# Supplementary material for: uORF-Tools—Workflow for the determination of translation-regulatory upstream open reading frames
Source: PLOS journal article supplement (doi:10.1371/journal.pone.0222459), 2019-09-12
Supplement: S2 (10.1371/journal.pone.0222459.s002) [file journal.pone.0222459.s002.pdf]

**S1 Table. Ribo-seq data series used for the generation of the comprehensive human uORF annotation file.** Data sets came from nine different data series and consisted of variable numbers of treatments and replicates. 35 data sets of individual samples each included ribo-seq and associated RNA-seq data.

| Data series # | Date series ID | Data set (ribo-seq IDs)                                                                                                                                                                                              |
|---------------|----------------|----------------------------------------------------------------------------------------------------------------------------------------------------------------------------------------------------------------------|
| 1             | GSE103719      | GSM2779669 / GSM2779661<br>GSM2779670 / GSM2779662<br>GSM2779671 / GSM2779663<br>GSM2779672 / GSM2779664<br>GSM2779673 / GSM2779665<br>GSM2779674 / GSM2779666<br>GSM2779675 / GSM2779667<br>GSM2779676 / GSM2779668 |
| 2             | GSE66929       | GSM1634443 / GSM1632189<br>GSM1634445 / GSM1632191<br>GSM1634449 / GSM1632193                                                                                                                                        |
|               | GSE96716       | GSM2538903 / GSM2538901<br>GSM2538904 / GSM2538902                                                                                                                                                                   |
| 4             | GSE42509       | GSM1047584 / GSM1041191<br>GSM1047585 / GSM1041192<br>GSM1047586 / GSM1041193<br>GSM1047587 / GSM1041194<br>GSM1047591 / GSM1041199                                                                                  |
| 5             | GSE69602       | GSM1704511 / GSM1704559<br>GSM1704513 / GSM1704561<br>GSM1704523 / GSM1704571<br>GSM1704525 / GSM1704573                                                                                                             |
| 6             | GSE56924       | GSM1371443 / GSM1371395<br>GSM1371449 / GSM1371401<br>GSM1371455 / GSM1371407<br>GSM1371461 / GSM1371413                                                                                                             |
| 7             | GSE96714       | GSM2538884 / GSM2538879                                                                                                                                                                                              |
| 8             | GSE114636      | GSM3146275 / GSM3146283<br>GSM3146276 / GSM3146284                                                                                                                                                                   |
| 9             | GSE98623       | GSM2602082 / GSM2602073<br>GSM2602083 / GSM2602074<br>GSM2602084 / GSM2602075<br>GSM2602085 / GSM2602076<br>GSM2602086 / GSM2602077<br>GSM2602087 / GSM2602078                                                       |
