# Supplementary material for: uORF-Tools—Workflow for the determination of translation-regulatory upstream open reading frames
Source: PLoS One. 2019 Sep 12;14(9):e0222459. doi: 10.1371/journal.pone.0222459 (PMC6742470; doi:10.1371/journal.pone.0222459)
Supplement: S2 Table — (XLSX) [file pone.0222459.s003.xlsx]

## Sheet: Comprehensive_annotation_file
	ORF_id_gen	chromosome	start	stop	gene_id	gene_symbol	strand	start_codon	ORF_length	transcript_id	uORFids
0	chr1:24415814-24419407:+	chr1	24415815	24419407	ENSG00000001461.16	NIPAL3	+	ATG	68	ENST00000003912.7	ENST00000003912.7.1
1	chr1:114716156-114716849:-	chr1	114716157	114716849	ENSG00000213281.4	NRAS	-	ATG	70	ENST00000369535.4	ENST00000369535.4.1
2	chr2:96208543-96208630:-	chr2	96208544	96208630	ENSG00000084090.13	STARD7	-	ATG	28	ENST00000337288.9	ENST00000337288.9.1
3	chr2:241268523-241315791:-	chr2	241268524	241315791	ENSG00000115677.16	HDLBP	-	ATG	79	ENST00000310931.8	ENST00000310931.8.1
4	chr3:132660317-132660422:+	chr3	132660318	132660422	ENSG00000081307.12	UBA5	+	ATG	34	ENST00000356232.8	ENST00000356232.8.1
5	chr6:24720331-24720439:-	chr6	24720332	24720439	ENSG00000112308.12	C6orf62	-	ATG	35	ENST00000378119.8	ENST00000378119.8.1
6	chr6:34425214-34426078:-	chr6	34425215	34426078	ENSG00000124614.14	RPS10	-	ATG	17	ENST00000326199.12	ENST00000326199.12.1
7	chr6:63572680-63576531:+	chr6	63572681	63576531	ENSG00000112245.10	PTP4A1	+	ATG	44	ENST00000370651.5	ENST00000370651.5.1
8	chr7:27179748-27179910:-	chr7	27179749	27179910	ENSG00000257184.3	HOXA10-HOXA9	-	ATG	53	ENST00000470747.4	ENST00000470747.4.1
9	chr8:144509076-144509445:+	chr8	144509077	144509445	ENSG00000167700.8	MFSD3	+	ATG	122	ENST00000301327.4	ENST00000301327.4.1
10	chr10:95693685-95694015:-	chr10	95693686	95694015	ENSG00000119977.20	TCTN3	-	ATG	109	ENST00000265993.13	ENST00000265993.13.1
11	chr11:112025173-112025509:+	chr11	112025174	112025509	ENSG00000150768.15	DLAT	+	ATG	111	ENST00000280346.10	ENST00000280346.10.1
12	chr12:2885284-2885512:+	chr12	2885285	2885512	ENSG00000171792.10	RHNO1	+	ATG	75	ENST00000489288.6	ENST00000489288.6.1
13	chr12:92145756-92145828:-	chr12	92145757	92145828	ENSG00000133639.4	BTG1	-	ATG	23	ENST00000256015.4	ENST00000256015.4.1
14	chr14:103334575-103335924:+	chr14	103334576	103335924	ENSG00000100664.10	EIF5	+	ATG	97	ENST00000216554.7	ENST00000216554.7.1
15	chr15:41096325-41116280:-	chr15	41096326	41116280	ENSG00000128908.15	INO80	-	ATG	111	ENST00000361937.7	ENST00000361937.7.1
16	chr16:19523960-19524023:+	chr16	19523961	19524023	ENSG00000103540.16	CCP110	+	ATG	20	ENST00000396212.6	ENST00000396212.6.1
17	chr18:65751093-65809714:+	chr18	65751094	65809714	ENSG00000081138.13	CDH7	+	ATG	157	ENST00000397968.3	ENST00000397968.3.1
18	chr19:32959971-32971914:-	chr19	32959972	32971914	ENSG00000121289.17	CEP89	-	ATG	90	ENST00000305768.9	ENST00000305768.9.1
19	chr19:37169899-37169965:-	chr19	37169900	37169965	ENSG00000196967.10	ZNF585A	-	ATG	21	ENST00000292841.9	ENST00000292841.9.1
20	chr19:40742432-40744683:-	chr19	40742433	40744683	ENSG00000188493.14	C19orf54	-	ATG	179	ENST00000470681.5	ENST00000470681.5.1
21	chr19:49929395-49930906:+	chr19	49929396	49930906	ENSG00000169136.10	ATF5	+	ATG	59	ENST00000423777.6	ENST00000423777.6.1
22	chrX:47218426-47218471:+	chrX	47218427	47218471	ENSG00000102225.15	CDK16	+	ATG	14	ENST00000457458.6	ENST00000457458.6.1
23	chr1:1375164-1375296:-	chr1	1375165	1375296	ENSG00000175756.13	AURKAIP1	-	ATG	43	ENST00000338338.9	ENST00000338338.9.1
24	chr1:9942630-9942735:-	chr1	9942631	9942735	ENSG00000162441.11	LZIC	-	ATG	34	ENST00000377223.5	ENST00000377223.5.1
25	chr1:36397811-36397868:-	chr1	36397812	36397868	ENSG00000181817.5	LSM10	-	ATG	18	ENST00000315732.2	ENST00000315732.2.1
26	chr1:53838275-53838407:-	chr1	53838276	53838407	ENSG00000058804.11	NDC1	-	ATG	43	ENST00000371429.3	ENST00000371429.3.1
27	chr1:53889352-53889463:-	chr1	53889353	53889463	ENSG00000058799.14	YIPF1	-	ATG	36	ENST00000072644.6	ENST00000072644.6.1
28	chr1:52055508-52055691:-	chr1	52055509	52055691	ENSG00000117862.11	TXNDC12	-	ATG	60	ENST00000371626.8	ENST00000371626.8.1
29	chr1:93180446-93180557:-	chr1	93180447	93180557	ENSG00000117500.12	TMED5	-	ATG	36	ENST00000370282.7	ENST00000370282.7.1
30	chr1:156728642-156728873:+	chr1	156728643	156728873	ENSG00000143303.11	RRNAD1	+	ATG	76	ENST00000368218.8	ENST00000368218.8.1
31	chr1:156194123-156194192:+	chr1	156194124	156194192	ENSG00000160785.13	SLC25A44	+	ATG	22	ENST00000359511.4	ENST00000359511.4.1
32	chr1:158076215-158078060:+	chr1	158076216	158078060	ENSG00000183853.17	KIRREL	+	ATG	38	ENST00000360089.8	ENST00000360089.8.1
33	chr1:165827833-165885147:+	chr1	165827834	165885147	ENSG00000143179.15	UCK2	+	ATG	34	ENST00000642653.1	ENST00000642653.1.1
34	chr1:168178961-168179081:+	chr1	168178962	168179081	ENSG00000143155.12	TIPRL	+	ATG	39	ENST00000367833.6	ENST00000367833.6.1
35	chr1:172442690-172442729:-	chr1	172442691	172442729	ENSG00000135845.9	PIGC	-	ATG	12	ENST00000367728.1	ENST00000367728.1.1
36	chr1:173811305-173823975:-	chr1	173811306	173823975	ENSG00000120334.15	CENPL	-	ATG	16	ENST00000356198.6	ENST00000356198.6.1
37	chr1:179852705-179852780:-	chr1	179852706	179852780	ENSG00000169905.12	TOR1AIP2	-	ATG	24	ENST00000367612.7	ENST00000367612.7.1
38	chr1:204411486-204411642:-	chr1	204411487	204411642	ENSG00000158615.8	PPP1R15B	-	ATG	51	ENST00000367188.4	ENST00000367188.4.1
39	chr1:204411663-204411690:-	chr1	204411664	204411690	ENSG00000158615.8	PPP1R15B	-	ATG	8	ENST00000367188.4	ENST00000367188.4.2
40	chr1:227563694-227650975:+	chr1	227563695	227650975	ENSG00000181450.17	ZNF678	+	ATG	89	ENST00000608949.5	ENST00000608949.5.1
41	chr1:233327785-233327887:+	chr1	233327786	233327887	ENSG00000143674.10	RP5-862P8.2	+	ATG	33	ENST00000366624.7	ENST00000366624.7.1
42	chr1:231241225-231241339:+	chr1	231241226	231241339	ENSG00000116906.12	GNPAT	+	ATG	37	ENST00000366647.8	ENST00000366647.8.1
43	chr1:235328581-235328719:+	chr1	235328582	235328719	ENSG00000152904.11	GGPS1	+	ATG	45	ENST00000282841.9	ENST00000282841.9.1
44	chr1:240091945-240092071:+	chr1	240091946	240092071	ENSG00000155816.19	FMN2	+	ATG	41	ENST00000319653.13	ENST00000319653.13.1
45	chr1:241848840-241848906:+	chr1	241848841	241848906	ENSG00000174371.16	EXO1	+	ATG	21	ENST00000366548.7	ENST00000366548.7.1
46	chr1:236795320-236803436:+	chr1	236795321	236803436	ENSG00000116984.12	MTR	+	ATG	141	ENST00000366577.9	ENST00000366577.9.1
47	chr1:244835527-244835566:+	chr1	244835528	244835566	ENSG00000203667.9	COX20	+	ATG	12	ENST00000411948.6	ENST00000411948.6.1
48	chr2:9423673-9423721:+	chr2	9423674	9423721	ENSG00000119203.13	CPSF3	+	ATG	15	ENST00000238112.7	ENST00000238112.7.1
49	chr2:27134485-27134578:-	chr2	27134486	27134578	ENSG00000138073.13	PREB	-	ATG	30	ENST00000260643.6	ENST00000260643.6.1
50	chr2:37316836-37316893:-	chr2	37316837	37316893	ENSG00000115825.9	PRKD3	-	ATG	18	ENST00000379066.5	ENST00000379066.5.1
51	chr2:44169013-44169133:+	chr2	44169014	44169133	ENSG00000138032.20	PPM1B	+	ATG	39	ENST00000378551.6	ENST00000378551.6.1
52	chr2:44168902-44168929:+	chr2	44168903	44168929	ENSG00000138032.20	PPM1B	+	ATG	8	ENST00000378551.6	ENST00000378551.6.2
53	chr2:55419163-55419202:-	chr2	55419164	55419202	ENSG00000115355.16	CCDC88A	-	ATG	12	ENST00000263630.13	ENST00000263630.13.1
54	chr2:112646592-112646670:+	chr2	112646593	112646670	ENSG00000144136.10	SLC20A1	+	ATG	25	ENST00000272542.7	ENST00000272542.7.1
55	chr2:113756463-113756490:-	chr2	113756464	113756490	ENSG00000115084.13	SLC35F5	-	ATG	8	ENST00000245680.6	ENST00000245680.6.1
56	chr2:175118339-175136443:-	chr2	175118340	175136443	ENSG00000115966.16	ATF2	-	ATG	43	ENST00000345739.9	ENST00000345739.9.1
57	chr2:189661520-189666111:+	chr2	189661521	189666111	ENSG00000138381.9	ASNSD1	+	ATG	96	ENST00000260952.8	ENST00000260952.8.1
58	chr2:191013637-191013661:-	chr2	191013638	191013661	ENSG00000115415.18	STAT1	-	ATG	7	ENST00000361099.7	ENST00000361099.7.1
59	chr2:218737595-218737664:+	chr2	218737596	218737664	ENSG00000135912.10	TTLL4	+	ATG	22	ENST00000392102.5	ENST00000392102.5.1
60	chr2:219245896-219245980:+	chr2	219245897	219245980	ENSG00000115661.13	STK16	+	ATG	27	ENST00000409638.7	ENST00000409638.7.1
61	chr2:241315603-241315645:-	chr2	241315604	241315645	ENSG00000115677.16	HDLBP	-	ATG	13	ENST00000310931.8	ENST00000310931.8.2
62	chr3:12663905-12663959:-	chr3	12663906	12663959	ENSG00000132155.11	RAF1	-	ATG	17	ENST00000251849.8	ENST00000251849.8.1
63	chr3:15096710-15098157:-	chr3	15096711	15098157	ENSG00000131381.12	RBSN	-	ATG	12	ENST00000253699.7	ENST00000253699.7.1
64	chr3:28348696-28348783:-	chr3	28348697	28348783	ENSG00000163512.13	AZI2	-	ATG	28	ENST00000479665.5	ENST00000479665.5.1
65	chr3:47805344-47805419:+	chr3	47805345	47805419	ENSG00000132153.14	DHX30	+	ATG	24	ENST00000445061.5	ENST00000445061.5.1
66	chr3:50613894-50617683:+	chr3	50613895	50617683	ENSG00000114738.10	MAPKAPK3	+	ATG	97	ENST00000446044.5	ENST00000446044.5.1
67	chr3:94063014-94064501:+	chr3	94063015	94064501	ENSG00000178694.9	NSUN3	+	ATG	62	ENST00000314622.8	ENST00000314622.8.1
68	chr3:88058138-88058216:-	chr3	88058139	88058216	ENSG00000163320.10	CGGBP1	-	ATG	25	ENST00000462901.5	ENST00000462901.5.1
69	chr3:99817948-99817978:+	chr3	99817949	99817978	ENSG00000184220.11	CMSS1	+	ATG	9	ENST00000421999.7	ENST00000421999.7.1
70	chr3:119498631-119498691:+	chr3	119498632	119498691	ENSG00000113845.9	TIMMDC1	+	ATG	19	ENST00000494664.5	ENST00000494664.5.1
71	chr3:152269025-152269076:+	chr3	152269026	152269076	ENSG00000152601.17	MBNL1	+	ATG	16	ENST00000355460.6	ENST00000355460.6.1
72	chr3:186570661-186570862:+	chr3	186570662	186570862	ENSG00000090520.11	DNAJB11	+	ATG	66	ENST00000439351.5	ENST00000439351.5.1
73	chr3:196503548-196503614:-	chr3	196503549	196503614	ENSG00000163961.4	RNF168	-	ATG	21	ENST00000318037.3	ENST00000318037.3.1
74	chr4:39366298-39366319:-	chr4	39366299	39366319	ENSG00000035928.15	RFC1	-	ATG	6	ENST00000381897.5	ENST00000381897.5.1
75	chr4:41990503-41990632:+	chr4	41990504	41990632	ENSG00000014824.13	SLC30A9	+	ATG	42	ENST00000264451.11	ENST00000264451.11.1
76	chr4:39527314-39527500:-	chr4	39527315	39527500	ENSG00000109814.11	UGDH	-	ATG	61	ENST00000316423.10	ENST00000316423.10.1
77	chr4:75630141-75630276:-	chr4	75630142	75630276	ENSG00000138769.10	CDKL2	-	ATG	44	ENST00000429927.6	ENST00000429927.6.1
78	chr4:82900166-82900435:-	chr4	82900167	82900435	ENSG00000138674.16	SEC31A	-	ATG	52	ENST00000355196.6	ENST00000355196.6.1
79	chr4:104491977-104492040:-	chr4	104491978	104492040	ENSG00000168772.10	CXXC4	-	ATG	20	ENST00000394767.2	ENST00000394767.2.1
80	chr4:145180009-145180147:-	chr4	145180010	145180147	ENSG00000164164.16	OTUD4	-	ATG	45	ENST00000447906.7	ENST00000447906.7.1
81	chr4:155667205-155696947:+	chr4	155667206	155696947	ENSG00000164116.16	GUCY1A3	+	ATG	33	ENST00000393832.7	ENST00000393832.7.1
82	chr4:183099457-183099499:+	chr4	183099458	183099499	ENSG00000151718.15	WWC2	+	ATG	13	ENST00000403733.7	ENST00000403733.7.1
83	chr5:5422785-5422881:+	chr5	5422786	5422881	ENSG00000164151.11	ICE1	+	ATG	31	ENST00000296564.8	ENST00000296564.8.1
84	chr5:61161109-61161196:-	chr5	61161110	61161196	ENSG00000188725.7	SMIM15	-	ATG	28	ENST00000339020.7	ENST00000339020.7.1
85	chr5:57175831-57175858:+	chr5	57175832	57175858	ENSG00000062194.15	GPBP1	+	ATG	8	ENST00000424459.7	ENST00000424459.7.1
86	chr5:62306472-62308343:+	chr5	62306473	62308343	ENSG00000068796.16	KIF2A	+	ATG	32	ENST00000381103.6	ENST00000381103.6.1
87	chr5:64768954-64768993:+	chr5	64768955	64768993	ENSG00000153015.15	CWC27	+	ATG	12	ENST00000381070.7	ENST00000381070.7.1
88	chr5:65624828-65624951:+	chr5	65624829	65624951	ENSG00000113597.17	TRAPPC13	+	ATG	40	ENST00000399438.7	ENST00000399438.7.1
89	chr5:77030624-77030723:+	chr5	77030625	77030723	ENSG00000164252.12	AGGF1	+	ATG	32	ENST00000312916.11	ENST00000312916.11.1
90	chr5:77077874-77078689:-	chr5	77077875	77078689	ENSG00000132846.5	ZBED3	-	ATG	38	ENST00000255198.2	ENST00000255198.2.1
91	chr5:90529456-90529525:-	chr5	90529457	90529525	ENSG00000176018.12	LYSMD3	-	ATG	22	ENST00000315948.10	ENST00000315948.10.1
92	chr5:138021109-138021157:-	chr5	138021110	138021157	ENSG00000031003.10	FAM13B	-	ATG	15	ENST00000033079.7	ENST00000033079.7.1
93	chr5:138542936-138543204:-	chr5	138542937	138543204	ENSG00000120705.12	ETF1	-	ATG	35	ENST00000360541.9	ENST00000360541.9.1
94	chr5:140564843-140566762:+	chr5	140564844	140566762	ENSG00000176087.14	SLC35A4	+	ATG	103	ENST00000323146.7	ENST00000323146.7.1
95	chr5:141320513-141320723:-	chr5	141320514	141320723	ENSG00000178913.7	TAF7	-	ATG	69	ENST00000313368.7	ENST00000313368.7.1
96	chr5:147671902-147782553:-	chr5	147671903	147782553	ENSG00000176049.15	JAKMIP2	-	ATG	49	ENST00000265272.9	ENST00000265272.9.1
97	chr5:176238508-176261111:+	chr5	176238509	176261111	ENSG00000170085.17	SIMC1	+	ATG	70	ENST00000443967.5	ENST00000443967.5.1
98	chr5:176361647-176361710:-	chr5	176361648	176361710	ENSG00000122203.14	KIAA1191	-	ATG	20	ENST00000298569.8	ENST00000298569.8.1
99	chr5:173328349-173328385:-	chr5	173328350	173328385	ENSG00000113739.10	STC2	-	ATG	11	ENST00000265087.8	ENST00000265087.8.1
100	chr5:180851346-180851466:-	chr5	180851347	180851466	ENSG00000196670.13	ZFP62	-	ATG	39	ENST00000512132.5	ENST00000512132.5.1
101	chr6:7389889-7389952:+	chr6	7389890	7389952	ENSG00000124784.8	RIOK1	+	ATG	20	ENST00000379834.6	ENST00000379834.6.1
102	chr6:24719329-24719554:-	chr6	24719330	24719554	ENSG00000112308.12	C6orf62	-	ATG	74	ENST00000378119.8	ENST00000378119.8.2
103	chr6:35281122-35281179:+	chr6	35281123	35281179	ENSG00000065029.14	ZNF76	+	ATG	18	ENST00000373953.7	ENST00000373953.7.1
104	chr6:35411046-35421847:+	chr6	35411047	35421847	ENSG00000112033.13	PPARD	+	ATG	117	ENST00000311565.4	ENST00000311565.4.1
105	chr6:34392524-34392644:-	chr6	34392525	34392644	ENSG00000272325.1	NUDT3	-	ATG	39	ENST00000607016.1	ENST00000607016.1.1
106	chr6:53065601-53065673:+	chr6	53065602	53065673	ENSG00000112146.16	FBXO9	+	ATG	23	ENST00000323557.11	ENST00000323557.11.1
107	chr6:127343373-127343427:-	chr6	127343374	127343427	ENSG00000093144.18	ECHDC1	-	ATG	17	ENST00000454859.7	ENST00000454859.7.1
108	chr6:133241609-133241675:+	chr6	133241610	133241675	ENSG00000112319.18	EYA4	+	ATG	21	ENST00000367895.9	ENST00000367895.9.1
109	chr6:152975614-152983469:-	chr6	152975615	152983469	ENSG00000112029.9	FBXO5	-	ATG	80	ENST00000367241.3	ENST00000367241.3.1
110	chr6:159790513-159790549:+	chr6	159790514	159790549	ENSG00000112110.9	MRPL18	+	ATG	11	ENST00000367034.4	ENST00000367034.4.1
111	chr7:17940324-17940483:-	chr7	17940325	17940483	ENSG00000071189.21	SNX13	-	ATG	52	ENST00000428135.7	ENST00000428135.7.1
112	chr7:35253937-35253970:-	chr7	35253938	35253970	ENSG00000164532.10	TBX20	-	ATG	10	ENST00000408931.3	ENST00000408931.3.1
113	chr7:35694433-35694487:-	chr7	35694434	35694487	ENSG00000122557.9	HERPUD2	-	ATG	17	ENST00000396081.5	ENST00000396081.5.1
114	chr7:66205482-66240404:+	chr7	66205483	66240404	ENSG00000169902.13	TPST1	+	ATG	39	ENST00000304842.5	ENST00000304842.5.1
115	chr7:64679198-64691247:+	chr7	64679199	64691247	ENSG00000196247.11	ZNF107	+	ATG	45	ENST00000344930.7	ENST00000344930.7.1
116	chr7:72879425-72879524:+	chr7	72879426	72879524	ENSG00000196313.11	POM121	+	ATG	32	ENST00000395270.5	ENST00000395270.5.1
117	chr7:75073752-75073776:-	chr7	75073753	75073776	ENSG00000274523.4	WBSCR16	-	ATG	7	ENST00000610322.4	ENST00000610322.4.1
118	chr7:83648741-83648792:-	chr7	83648742	83648792	ENSG00000170381.13	SEMA3E	-	ATG	16	ENST00000643230.1	ENST00000643230.1.1
119	chr7:99408834-99408885:+	chr7	99408835	99408885	ENSG00000106245.10	BUD31	+	ATG	16	ENST00000403633.6	ENST00000403633.6.1
120	chr7:98881102-98881126:+	chr7	98881103	98881126	ENSG00000196367.13	TRRAP	+	ATG	7	ENST00000355540.7	ENST00000355540.7.1
121	chr7:108569625-108569682:-	chr7	108569626	108569682	ENSG00000177683.13	THAP5	-	ATG	18	ENST00000415914.3	ENST00000415914.3.1
122	chr7:105532286-105536573:+	chr7	105532287	105536573	ENSG00000135249.7	RINT1	+	ATG	41	ENST00000257700.6	ENST00000257700.6.1
123	chr7:103344697-103344754:-	chr7	103344698	103344754	ENSG00000105821.14	DNAJC2	-	ATG	18	ENST00000379263.7	ENST00000379263.7.1
124	chr7:129054849-129054888:-	chr7	129054850	129054888	ENSG00000064419.13	TNPO3	-	ATG	12	ENST00000265388.9	ENST00000265388.9.1
125	chr7:134646838-134661464:+	chr7	134646839	134661464	ENSG00000172331.11	BPGM	+	ATG	38	ENST00000344924.7	ENST00000344924.7.1
126	chr8:17247067-17247109:+	chr8	17247068	17247109	ENSG00000155975.9	VPS37A	+	ATG	13	ENST00000324849.8	ENST00000324849.8.1
127	chr8:43097556-43102538:+	chr8	43097557	43102538	ENSG00000185900.9	POMK	+	ATG	30	ENST00000331373.9	ENST00000331373.9.1
128	chr8:55762965-55763007:-	chr8	55762966	55763007	ENSG00000167904.14	TMEM68	-	ATG	13	ENST00000334667.6	ENST00000334667.6.1
129	chr8:109540190-109540424:+	chr8	109540191	109540424	ENSG00000147654.14	EBAG9	+	ATG	77	ENST00000337573.9	ENST00000337573.9.1
130	chr8:120811833-120813121:-	chr8	120811834	120813121	ENSG00000172164.13	SNTB1	-	ATG	90	ENST00000395601.7	ENST00000395601.7.1
131	chr8:123347259-123356434:-	chr8	123347260	123356434	ENSG00000156802.12	ATAD2	-	ATG	138	ENST00000521903.5	ENST00000521903.5.1
132	chr9:34179060-34179147:+	chr9	34179061	34179147	ENSG00000165006.13	UBAP1	+	ATG	28	ENST00000297661.8	ENST00000297661.8.1
133	chr9:38068784-38068904:-	chr9	38068785	38068904	ENSG00000107338.9	SHB	-	ATG	39	ENST00000377707.3	ENST00000377707.3.1
134	chr9:38392734-38395780:+	chr9	38392735	38395780	ENSG00000137124.7	ALDH1B1	+	ATG	37	ENST00000377698.3	ENST00000377698.3.1
135	chr9:35732635-35732824:+	chr9	35732636	35732824	ENSG00000107175.11	CREB3	+	ATG	62	ENST00000353704.2	ENST00000353704.2.1
136	chr9:95875916-95880940:+	chr9	95875917	95880940	ENSG00000182150.15	ERCC6L2	+	ATG	79	ENST00000288985.11	ENST00000288985.11.1
137	chr9:93453254-93453491:-	chr9	93453255	93453491	ENSG00000188938.15	FAM120AOS	-	ATG	78	ENST00000375412.9	ENST00000375412.9.1
138	chr9:96777684-96777828:-	chr9	96777685	96777828	ENSG00000081386.12	ZNF510	-	ATG	47	ENST00000375231.5	ENST00000375231.5.1
139	chr9:105244803-105244827:+	chr9	105244804	105244827	ENSG00000070214.15	SLC44A1	+	ATG	7	ENST00000374724.1	ENST00000374724.1.1
140	chr9:105574979-105575033:+	chr9	105574980	105575033	ENSG00000106692.14	FKTN	+	ATG	17	ENST00000223528.6	ENST00000223528.6.1
141	chr9:107489437-107489620:-	chr9	107489438	107489620	ENSG00000136826.14	KLF4	-	ATG	60	ENST00000374672.4	ENST00000374672.4.1
142	chr9:112297861-112333477:-	chr9	112297862	112333477	ENSG00000119314.15	PTBP3	-	ATG	20	ENST00000374257.5	ENST00000374257.5.1
143	chr9:128127843-128128413:-	chr9	128127844	128128413	ENSG00000148334.14	PTGES2	-	ATG	189	ENST00000338961.10	ENST00000338961.10.1
144	chr9:128702572-128702839:+	chr9	128702573	128702839	ENSG00000160447.6	PKN3	+	ATG	88	ENST00000291906.4	ENST00000291906.4.1
145	chr9:128886027-128886105:+	chr9	128886028	128886105	ENSG00000136802.11	LRRC8A	+	ATG	25	ENST00000372600.8	ENST00000372600.8.1
146	chr9:125707113-125707143:-	chr9	125707114	125707143	ENSG00000119487.16	MAPKAP1	-	ATG	9	ENST00000373511.6	ENST00000373511.6.1
147	chr9:135484056-135484455:+	chr9	135484057	135484455	ENSG00000196422.10	PPP1R26	+	ATG	10	ENST00000605286.5	ENST00000605286.5.1
148	chr9:131530631-131531196:-	chr9	131530632	131531196	ENSG00000130717.12	UCK1	-	ATG	47	ENST00000372215.4	ENST00000372215.4.1
149	chr9:136116980-136118602:-	chr9	136116981	136118602	ENSG00000238227.7	C9orf69	-	ATG	53	ENST00000418388.5	ENST00000418388.5.1
150	chr9:134025862-134025988:+	chr9	134025863	134025988	ENSG00000235106.9	RP11-374P20.5	+	ATG	41	ENST00000603928.2	ENST00000603928.2.1
151	chr10:22321234-22321324:+	chr10	22321235	22321324	ENSG00000168283.13	BMI1	+	ATG	29	ENST00000376663.7	ENST00000376663.7.1
152	chr10:18651382-18651448:-	chr10	18651383	18651448	ENSG00000241058.3	NSUN6	-	ATG	21	ENST00000377304.6	ENST00000377304.6.1
153	chr10:28535610-28590796:+	chr10	28535611	28590796	ENSG00000095787.21	WAC	+	ATG	148	ENST00000375664.8	ENST00000375664.8.1
154	chr10:68721250-68722467:+	chr10	68721251	68722467	ENSG00000060339.13	CCAR1	+	ATG	14	ENST00000265872.10	ENST00000265872.10.1
155	chr10:92291216-92311190:+	chr10	92291217	92311190	ENSG00000198060.9	MARCH5	+	ATG	122	ENST00000358935.2	ENST00000358935.2.1
156	chr10:96832302-96833452:+	chr10	96832303	96833452	ENSG00000196233.13	LCOR	+	ATG	47	ENST00000421806.3	ENST00000421806.3.1
157	chr10:98443214-98445396:-	chr10	98443215	98445396	ENSG00000107521.18	HPS1	-	ATG	40	ENST00000325103.10	ENST00000325103.10.1
158	chr10:100987823-100987892:+	chr10	100987824	100987892	ENSG00000107815.8	TWNK	+	ATG	22	ENST00000370228.2	ENST00000370228.2.1
159	chr10:99659877-99659928:+	chr10	99659878	99659928	ENSG00000198018.6	ENTPD7	+	ATG	16	ENST00000370489.4	ENST00000370489.4.1
160	chr10:114174042-114174087:-	chr10	114174043	114174087	ENSG00000165813.18	CCDC186	-	ATG	14	ENST00000369287.7	ENST00000369287.7.1
161	chr11:2400608-2400794:+	chr11	2400609	2400794	ENSG00000184281.14	TSSC4	+	ATG	61	ENST00000380996.9	ENST00000380996.9.1
162	chr11:7020077-7020116:-	chr11	7020078	7020116	ENSG00000149050.9	ZNF214	-	ATG	12	ENST00000278314.4	ENST00000278314.4.1
163	chr11:7252173-7303165:+	chr11	7252174	7303165	ENSG00000170743.16	SYT9	+	ATG	94	ENST00000318881.10	ENST00000318881.10.1
164	chr11:13349986-13350007:+	chr11	13349987	13350007	ENSG00000133794.17	ARNTL	+	ATG	6	ENST00000401424.5	ENST00000401424.5.1
165	chr11:61364355-61366169:+	chr11	61364356	61366169	ENSG00000149483.11	TMEM138	+	ATG	95	ENST00000278826.10	ENST00000278826.10.1
166	chr11:64234537-64234792:+	chr11	64234538	64234792	ENSG00000173511.9	VEGFB	+	ATG	84	ENST00000309422.6	ENST00000309422.6.1
167	chr11:65041010-65041058:+	chr11	65041011	65041058	ENSG00000168061.14	SAC3D1	+	ATG	15	ENST00000531072.1	ENST00000531072.1.1
168	chr11:73981511-73983034:-	chr11	73981512	73983034	ENSG00000175567.8	UCP2	-	ATG	144	ENST00000310473.7	ENST00000310473.7.1
169	chr11:83285968-83286172:-	chr11	83285969	83286172	ENSG00000137500.9	CCDC90B	-	ATG	67	ENST00000529689.5	ENST00000529689.5.1
170	chr11:94494005-94496639:+	chr11	94494006	94496639	ENSG00000168876.8	ANKRD49	+	ATG	21	ENST00000544612.5	ENST00000544612.5.1
171	chr11:95924050-95924092:-	chr11	95924051	95924092	ENSG00000087053.18	MTMR2	-	ATG	13	ENST00000346299.9	ENST00000346299.9.1
172	chr11:124623042-124623087:+	chr11	124623043	124623087	ENSG00000154144.12	TBRG1	+	ATG	14	ENST00000441174.7	ENST00000441174.7.1
173	chr12:14803426-14803465:-	chr12	14803427	14803465	ENSG00000084463.7	WBP11	-	ATG	12	ENST00000261167.6	ENST00000261167.6.1
174	chr12:45990414-45990441:-	chr12	45990415	45990441	ENSG00000139218.17	SCAF11	-	ATG	8	ENST00000369367.7	ENST00000369367.7.1
175	chr12:47964211-47964298:+	chr12	47964212	47964298	ENSG00000134291.11	TMEM106C	+	ATG	28	ENST00000256686.10	ENST00000256686.10.1
176	chr12:49460794-49484661:+	chr12	49460795	49484661	ENSG00000123352.17	SPATS2	+	ATG	104	ENST00000553127.5	ENST00000553127.5.1
177	chr12:54183813-54183948:-	chr12	54183814	54183948	ENSG00000123415.15	SMUG1	-	ATG	44	ENST00000513838.5	ENST00000513838.5.1
178	chr12:56216532-56216574:-	chr12	56216533	56216574	ENSG00000181852.17	RNF41	-	ATG	13	ENST00000345093.8	ENST00000345093.8.1
179	chr12:96400192-96400222:-	chr12	96400193	96400222	ENSG00000059758.7	CDK17	-	ATG	9	ENST00000261211.7	ENST00000261211.7.1
180	chr12:107685781-107685889:+	chr12	107685782	107685889	ENSG00000136045.11	PWP1	+	ATG	35	ENST00000412830.7	ENST00000412830.7.1
181	chr12:107760610-107761008:-	chr12	107760611	107761008	ENSG00000110851.11	PRDM4	-	ATG	70	ENST00000228437.9	ENST00000228437.9.1
182	chr12:110583230-110583302:-	chr12	110583231	110583302	ENSG00000196850.5	PPTC7	-	ATG	23	ENST00000354300.4	ENST00000354300.4.1
183	chr12:111842236-111842371:+	chr12	111842237	111842371	ENSG00000089022.13	MAPKAPK5	+	ATG	44	ENST00000550735.6	ENST00000550735.6.1
184	chr12:118016827-118017690:+	chr12	118016828	118017690	ENSG00000111445.13	RFC5	+	ATG	21	ENST00000392542.6	ENST00000392542.6.1
185	chr12:120534696-120534957:+	chr12	120534697	120534957	ENSG00000022840.15	RNF10	+	ATG	86	ENST00000325954.8	ENST00000325954.8.1
186	chr12:120687179-120687227:+	chr12	120687180	120687227	ENSG00000110917.7	MLEC	+	ATG	15	ENST00000228506.7	ENST00000228506.7.1
187	chr12:124863595-124863901:-	chr12	124863596	124863901	ENSG00000073060.15	SCARB1	-	ATG	101	ENST00000339570.9	ENST00000339570.9.1
188	chr12:122483446-122492734:-	chr12	122483447	122492734	ENSG00000033030.13	ZCCHC8	-	ATG	106	ENST00000543897.5	ENST00000543897.5.1
189	chr13:39037785-39037938:-	chr13	39037786	39037938	ENSG00000120685.19	PROSER1	-	ATG	50	ENST00000352251.7	ENST00000352251.7.1
190	chr13:52024717-52028590:+	chr13	52024718	52028590	ENSG00000253797.2	UTP14C	+	ATG	163	ENST00000521776.2	ENST00000521776.2.1
191	chr13:71867109-71867181:-	chr13	71867110	71867181	ENSG00000276644.4	DACH1	-	ATG	23	ENST00000613252.4	ENST00000613252.4.1
192	chr13:97275991-97276057:+	chr13	97275992	97276057	ENSG00000139793.18	MBNL2	+	ATG	21	ENST00000397601.5	ENST00000397601.5.1
193	chr13:113491127-113495505:+	chr13	113491128	113495505	ENSG00000150403.17	TMCO3	+	ATG	49	ENST00000434316.6	ENST00000434316.6.1
194	chr14:20329246-20329366:-	chr14	20329247	20329366	ENSG00000100814.17	CCNB1IP1	-	ATG	39	ENST00000358932.8	ENST00000358932.8.1
195	chr14:24141267-24141547:-	chr14	24141268	24141547	ENSG00000100908.13	EMC9	-	ATG	52	ENST00000216799.8	ENST00000216799.8.1
196	chr14:28767104-28767299:+	chr14	28767105	28767299	ENSG00000176165.10	FOXG1	+	ATG	64	ENST00000313071.6	ENST00000313071.6.1
197	chr14:50668148-50668271:-	chr14	50668149	50668271	ENSG00000151748.14	SAV1	-	ATG	40	ENST00000324679.4	ENST00000324679.4.1
198	chr14:57268838-57268874:-	chr14	57268839	57268874	ENSG00000070367.15	EXOC5	-	ATG	11	ENST00000621441.4	ENST00000621441.4.1
199	chr14:57269195-57269291:+	chr14	57269196	57269291	ENSG00000053770.11	AP5M1	+	ATG	31	ENST00000261558.7	ENST00000261558.7.1
200	chr14:69398689-69398821:+	chr14	69398690	69398821	ENSG00000029364.11	SLC39A9	+	ATG	43	ENST00000556605.5	ENST00000556605.5.1
201	chr14:70342694-70359603:-	chr14	70342695	70359603	ENSG00000133983.14	COX16	-	ATG	39	ENST00000389912.6	ENST00000389912.6.1
202	chr14:77028549-77028597:-	chr14	77028550	77028597	ENSG00000119669.4	IRF2BPL	-	ATG	15	ENST00000238647.4	ENST00000238647.4.1
203	chr14:92121987-92122041:+	chr14	92121988	92122041	ENSG00000165934.12	CPSF2	+	ATG	17	ENST00000298875.8	ENST00000298875.8.1
204	chr15:22838747-22838861:+	chr15	22838748	22838861	ENSG00000140157.14	NIPA2	+	ATG	37	ENST00000337451.7	ENST00000337451.7.1
205	chr15:50908720-50912112:+	chr15	50908721	50912112	ENSG00000081014.10	AP4E1	+	ATG	80	ENST00000261842.9	ENST00000261842.9.1
206	chr15:68278130-68278184:+	chr15	68278131	68278184	ENSG00000169018.5	FEM1B	+	ATG	17	ENST00000306917.4	ENST00000306917.4.1
207	chr15:70097054-70097132:-	chr15	70097055	70097132	ENSG00000140332.15	TLE3	-	ATG	25	ENST00000558939.5	ENST00000558939.5.1
208	chr15:77252443-77252497:-	chr15	77252444	77252497	ENSG00000173517.10	PEAK1	-	ATG	17	ENST00000560626.6	ENST00000560626.6.1
209	chr15:81001167-81001221:+	chr15	81001168	81001221	ENSG00000140406.3	MESDC1	+	ATG	17	ENST00000267984.3	ENST00000267984.3.1
210	chr15:81001260-81001410:+	chr15	81001261	81001410	ENSG00000140406.3	MESDC1	+	ATG	49	ENST00000267984.3	ENST00000267984.3.2
211	chr15:89088485-89088539:+	chr15	89088486	89088539	ENSG00000140526.17	ABHD2	+	ATG	17	ENST00000352732.9	ENST00000352732.9.1
212	chr16:53951-55489:+	chr16	53952	55489	ENSG00000161981.10	SNRNP25	+	ATG	45	ENST00000293861.7	ENST00000293861.7.1
213	chr16:689833-689917:-	chr16	689834	689917	ENSG00000127580.15	WDR24	-	ATG	27	ENST00000293883.8	ENST00000293883.8.1
214	chr16:28491769-28491796:-	chr16	28491770	28491796	ENSG00000188603.19	CLN3	-	ATG	8	ENST00000569430.6	ENST00000569430.6.1
215	chr16:30700708-30704082:+	chr16	30700709	30704082	ENSG00000080603.16	SRCAP	+	ATG	62	ENST00000262518.8	ENST00000262518.8.1
216	chr16:47143754-47143856:-	chr16	47143755	47143856	ENSG00000171208.9	NETO2	-	ATG	33	ENST00000562435.5	ENST00000562435.5.1
217	chr16:57204541-57204658:+	chr16	57204542	57204658	ENSG00000159579.13	RSPRY1	+	ATG	38	ENST00000394420.8	ENST00000394420.8.1
218	chr16:66934549-66934678:+	chr16	66934550	66934678	ENSG00000172831.11	CES2	+	ATG	42	ENST00000317091.8	ENST00000317091.8.1
219	chr16:67227148-67227879:+	chr16	67227149	67227879	ENSG00000168701.18	TMEM208	+	ATG	39	ENST00000304800.13	ENST00000304800.13.1
220	chr16:67893275-67908685:+	chr16	67893276	67908685	ENSG00000159792.9	PSKH1	+	ATG	33	ENST00000291041.5	ENST00000291041.5.1
221	chr16:70398784-70398952:-	chr16	70398785	70398952	ENSG00000157350.12	ST3GAL2	-	ATG	55	ENST00000393640.8	ENST00000393640.8.1
222	chr16:70399325-70399433:-	chr16	70399326	70399433	ENSG00000157350.12	ST3GAL2	-	ATG	35	ENST00000393640.8	ENST00000393640.8.2
223	chr16:75644452-75647639:-	chr16	75644453	75647639	ENSG00000065427.14	KARS	-	ATG	23	ENST00000319410.9	ENST00000319410.9.1
224	chr16:70523834-70523873:+	chr16	70523835	70523873	ENSG00000189091.12	SF3B3	+	ATG	12	ENST00000302516.9	ENST00000302516.9.1
225	chr16:84102015-84102051:-	chr16	84102016	84102051	ENSG00000140943.16	MBTPS1	-	ATG	11	ENST00000343411.7	ENST00000343411.7.1
226	chr17:3668826-3668862:+	chr17	3668827	3668862	ENSG00000127774.6	TMEM93	+	ATG	11	ENST00000248378.5	ENST00000248378.5.1
227	chr17:15651674-15677212:-	chr17	15651675	15677212	ENSG00000221926.11	TRIM16	-	ATG	102	ENST00000578237.5	ENST00000578237.5.1
228	chr17:16380933-16380957:+	chr17	16380934	16380957	ENSG00000170315.13	UBB	+	ATG	7	ENST00000302182.7	ENST00000302182.7.1
229	chr17:18314780-18314822:-	chr17	18314781	18314822	ENSG00000177302.14	TOP3A	-	ATG	13	ENST00000321105.9	ENST00000321105.9.1
230	chr17:18315568-18315607:+	chr17	18315569	18315607	ENSG00000176994.10	SMCR8	+	ATG	12	ENST00000406438.4	ENST00000406438.4.1
231	chr17:28339417-28339453:+	chr17	28339418	28339453	ENSG00000109079.9	TNFAIP1	+	ATG	11	ENST00000226225.6	ENST00000226225.6.1
232	chr17:30832278-30832320:+	chr17	30832279	30832320	ENSG00000176208.8	ATAD5	+	ATG	13	ENST00000321990.4	ENST00000321990.4.1
233	chr17:32007988-32017986:+	chr17	32007989	32017986	ENSG00000185158.12	LRRC37B	+	ATG	52	ENST00000543378.6	ENST00000543378.6.1
234	chr17:42824188-42824248:-	chr17	42824189	42824248	ENSG00000126581.12	BECN1	-	ATG	19	ENST00000361523.8	ENST00000361523.8.1
235	chr17:47189181-47189250:-	chr17	47189182	47189250	ENSG00000004897.11	CDC27	-	ATG	22	ENST00000066544.7	ENST00000066544.7.1
236	chr17:49707822-49708086:-	chr17	49707823	49708086	ENSG00000121073.13	SLC35B1	-	ATG	87	ENST00000240333.10	ENST00000240333.10.1
237	chr17:58351501-58352135:-	chr17	58351502	58352135	ENSG00000213246.6	SUPT4H1	-	ATG	25	ENST00000577396.5	ENST00000577396.5.1
238	chr17:59699157-59699898:-	chr17	59699158	59699898	ENSG00000141378.14	PTRH2	-	ATG	246	ENST00000409433.2	ENST00000409433.2.1
239	chr17:77088764-77088881:+	chr17	77088765	77088881	ENSG00000129657.14	SEC14L1	+	ATG	38	ENST00000392476.6	ENST00000392476.6.1
240	chr17:80013492-80013576:-	chr17	80013493	80013576	ENSG00000167291.15	TBC1D16	-	ATG	27	ENST00000310924.6	ENST00000310924.6.1
241	chr17:81395488-81399608:+	chr17	81395489	81399608	ENSG00000266074.8	BAHCC1	+	ATG	73	ENST00000584436.7	ENST00000584436.7.1
242	chr18:2571272-2571296:-	chr18	2571273	2571296	ENSG00000101574.14	METTL4	-	ATG	7	ENST00000319888.10	ENST00000319888.10.1
243	chr18:59139642-59139930:+	chr18	59139643	59139930	ENSG00000166562.8	SEC11C	+	ATG	95	ENST00000587834.5	ENST00000587834.5.1
244	chr18:57621772-57621820:-	chr18	57621773	57621820	ENSG00000134440.11	NARS	-	ATG	15	ENST00000256854.9	ENST00000256854.9.1
245	chr19:893135-893162:-	chr19	893136	893162	ENSG00000175221.14	MED16	-	ATG	8	ENST00000395808.7	ENST00000395808.7.1
246	chr19:1911902-1912160:+	chr19	1911903	1912160	ENSG00000213638.5	ADAT3	+	ATG	85	ENST00000329478.3	ENST00000329478.3.1
247	chr19:11529065-11529122:-	chr19	11529066	11529122	ENSG00000130159.13	ECSIT	-	ATG	18	ENST00000270517.11	ENST00000270517.11.1
248	chr19:18557906-18562105:+	chr19	18557907	18562105	ENSG00000105700.10	KXD1	+	ATG	25	ENST00000222307.8	ENST00000222307.8.1
249	chr19:36114934-36115024:-	chr19	36114935	36115024	ENSG00000105258.8	POLR2I	-	ATG	29	ENST00000221859.8	ENST00000221859.8.1
250	chr19:36589619-36589691:-	chr19	36589620	36589691	ENSG00000186020.12	ZNF529	-	ATG	23	ENST00000586115.5	ENST00000586115.5.1
251	chr19:36236033-36236153:+	chr19	36236034	36236153	ENSG00000167635.11	ZNF146	+	ATG	39	ENST00000443387.2	ENST00000443387.2.1
252	chr19:36236265-36236337:+	chr19	36236266	36236337	ENSG00000167635.11	ZNF146	+	ATG	23	ENST00000443387.2	ENST00000443387.2.2
253	chr19:39168229-39168271:+	chr19	39168230	39168271	ENSG00000130669.17	PAK4	+	ATG	13	ENST00000599386.5	ENST00000599386.5.1
254	chr19:40800522-40800603:+	chr19	40800523	40800603	ENSG00000269858.5	EGLN2	+	ATG	26	ENST00000303961.8	ENST00000303961.8.1
255	chr19:41268222-41272087:+	chr19	41268223	41272087	ENSG00000105323.16	HNRNPUL1	+	ATG	42	ENST00000352456.7	ENST00000352456.7.1
256	chr19:43596714-43597139:+	chr19	43596715	43597139	ENSG00000124444.15	ZNF576	+	ATG	24	ENST00000336564.4	ENST00000336564.4.1
257	chr19:48872553-48872634:+	chr19	48872554	48872634	ENSG00000087074.7	PPP1R15A	+	ATG	26	ENST00000200453.5	ENST00000200453.5.1
258	chr19:49929358-49929397:-	chr19	49929359	49929397	ENSG00000104951.15	IL4I1	-	ATG	12	ENST00000595948.5	ENST00000595948.5.1
259	chr19:55599465-55599495:-	chr19	55599466	55599495	ENSG00000179943.7	FIZ1	-	ATG	9	ENST00000590714.1	ENST00000590714.1.1
260	chr19:56601558-56621291:+	chr19	56601559	56621291	ENSG00000197951.8	ZNF71	+	ATG	18	ENST00000328070.10	ENST00000328070.10.1
261	chr19:57389920-57390004:+	chr19	57389921	57390004	ENSG00000188785.11	ZNF548	+	ATG	27	ENST00000366197.9	ENST00000366197.9.1
262	chr19:57559747-57559786:-	chr19	57559748	57559786	ENSG00000251369.8	ZNF550	-	ATG	12	ENST00000601415.5	ENST00000601415.5.1
263	chr20:325669-325732:+	chr20	325670	325732	ENSG00000177732.8	SOX12	+	ATG	20	ENST00000342665.4	ENST00000342665.4.1
264	chr20:10420545-10420737:-	chr20	10420546	10420737	ENSG00000125863.19	MKKS	-	ATG	63	ENST00000347364.7	ENST00000347364.7.1
265	chr20:44521993-44522038:-	chr20	44521994	44522038	ENSG00000132824.13	SERINC3	-	ATG	14	ENST00000342374.4	ENST00000342374.4.1
266	chr21:36699296-36699383:+	chr21	36699297	36699383	ENSG00000159263.15	SIM2	+	ATG	28	ENST00000290399.10	ENST00000290399.10.1
267	chr21:46318040-46322905:-	chr21	46318041	46322905	ENSG00000160298.17	C21orf58	-	ATG	148	ENST00000291691.11	ENST00000291691.11.1
268	chr21:46636928-46644318:+	chr21	46636929	46644318	ENSG00000160310.17	PRMT2	+	ATG	59	ENST00000355680.7	ENST00000355680.7.1
269	chr22:21000770-21002150:-	chr22	21000771	21002150	ENSG00000184436.11	THAP7	-	ATG	105	ENST00000399133.2	ENST00000399133.2.1
270	chr22:20917764-20917812:+	chr22	20917765	20917812	ENSG00000099942.12	CRKL	+	ATG	15	ENST00000354336.7	ENST00000354336.7.1
271	chr22:26481762-26481792:-	chr22	26481763	26481792	ENSG00000100099.20	HPS4	-	ATG	9	ENST00000398145.6	ENST00000398145.6.1
272	chr22:28883593-28883683:+	chr22	28883594	28883683	ENSG00000183579.15	ZNRF3	+	ATG	29	ENST00000544604.6	ENST00000544604.6.1
273	chr22:40400700-40400757:+	chr22	40400701	40400757	ENSG00000100359.20	SGSM3	+	ATG	18	ENST00000248929.13	ENST00000248929.13.1
274	chr22:41092589-41092703:+	chr22	41092590	41092703	ENSG00000100393.12	EP300	+	ATG	37	ENST00000263253.8	ENST00000263253.8.1
275	chr22:50294745-50307627:-	chr22	50294746	50307627	ENSG00000196576.14	PLXNB2	-	ATG	35	ENST00000449103.5	ENST00000449103.5.1
276	chrX:13735071-13740108:+	chrX	13735072	13740108	ENSG00000046651.14	OFD1	+	ATG	143	ENST00000380567.5	ENST00000380567.5.1
277	chrX:17746075-17749445:+	chrX	17746076	17749445	ENSG00000047634.14	SCML1	+	ATG	22	ENST00000380045.7	ENST00000380045.7.1
278	chrX:23783277-23783367:+	chrX	23783278	23783367	ENSG00000130066.16	SAT1	+	ATG	29	ENST00000379270.4	ENST00000379270.4.1
279	chrX:38033670-38033766:+	chrX	38033671	38033766	ENSG00000147041.11	SYTL5	+	ATG	31	ENST00000297875.6	ENST00000297875.6.1
280	chrX:38327440-38327485:-	chrX	38327441	38327485	ENSG00000156313.13	RPGR	-	ATG	14	ENST00000318842.11	ENST00000318842.11.1
281	chrX:154092264-154097665:-	chrX	154092265	154097665	ENSG00000169057.21	MECP2	-	ATG	34	ENST00000303391.10	ENST00000303391.10.1
282	chrX:153447877-153454493:-	chrX	153447878	153454493	ENSG00000183479.12	TREX2	-	ATG	43	ENST00000370232.3	ENST00000370232.3.1
283	chr1:3856991-3857192:-	chr1	3856992	3857192	ENSG00000116198.12	CEP104	-	ATG	66	ENST00000378230.7	ENST00000378230.7.1
284	chr1:6349848-6393925:-	chr1	6349849	6393925	ENSG00000097021.19	ACOT7	-	ATG	228	ENST00000361521.8	ENST00000361521.8.1
285	chr1:38991223-38998204:+	chr1	38991224	38998204	ENSG00000174574.15	AKIRIN1	+	ATG	136	ENST00000432648.7	ENST00000432648.7.1
286	chr1:51236326-51236431:+	chr1	51236327	51236431	ENSG00000123091.4	RNF11	+	ATG	34	ENST00000242719.3	ENST00000242719.3.1
287	chr1:224616789-224617062:+	chr1	224616790	224617062	ENSG00000143786.7	CNIH3	+	ATG	90	ENST00000272133.3	ENST00000272133.3.1
288	chr2:24084306-24084753:-	chr2	24084307	24084753	ENSG00000115129.13	TP53I3	-	ATG	15	ENST00000335934.8	ENST00000335934.8.1
289	chr2:27370638-27370668:+	chr2	27370639	27370668	ENSG00000115234.10	SNX17	+	ATG	9	ENST00000233575.6	ENST00000233575.6.1
290	chr2:31234411-31234471:+	chr2	31234412	31234471	ENSG00000013016.15	EHD3	+	ATG	19	ENST00000322054.9	ENST00000322054.9.1
291	chr2:112645944-112645989:+	chr2	112645945	112645989	ENSG00000144136.10	SLC20A1	+	ATG	14	ENST00000272542.7	ENST00000272542.7.2
292	chr2:130181753-130182065:-	chr2	130181754	130182065	ENSG00000136699.19	SMPD4	-	ATG	103	ENST00000409031.5	ENST00000409031.5.1
293	chr2:188974383-188984766:+	chr2	188974384	188984766	ENSG00000168542.14	COL3A1	+	ATG	63	ENST00000304636.7	ENST00000304636.7.1
294	chr3:37861975-37862230:+	chr3	37861976	37862230	ENSG00000144677.14	CTDSPL	+	ATG	84	ENST00000443503.6	ENST00000443503.6.1
295	chr3:48989958-48990291:+	chr3	48989959	48990291	ENSG00000178467.17	P4HTM	+	ATG	110	ENST00000383729.8	ENST00000383729.8.1
296	chr3:49747825-49748086:-	chr3	49747826	49748086	ENSG00000176095.11	IP6K1	-	ATG	86	ENST00000321599.8	ENST00000321599.8.1
297	chr3:133661113-133661993:-	chr3	133661114	133661993	ENSG00000163781.13	TOPBP1	-	ATG	81	ENST00000642236.1	ENST00000642236.1.1
298	chr3:193593225-193614742:+	chr3	193593226	193614742	ENSG00000198836.9	OPA1	+	ATG	67	ENST00000392438.7	ENST00000392438.7.1
299	chr4:48341547-48341646:+	chr4	48341548	48341646	ENSG00000109171.14	SLAIN2	+	ATG	32	ENST00000264313.10	ENST00000264313.10.1
300	chr4:53377644-53377866:+	chr4	53377645	53377866	ENSG00000145216.15	FIP1L1	+	ATG	73	ENST00000358575.9	ENST00000358575.9.1
301	chr4:80266711-80266828:+	chr4	80266712	80266828	ENSG00000138675.16	FGF5	+	ATG	38	ENST00000456523.3	ENST00000456523.3.1
302	chr4:82798715-82798766:-	chr4	82798716	82798766	ENSG00000145284.11	SCD5	-	ATG	16	ENST00000319540.8	ENST00000319540.8.1
303	chr4:118352655-118352748:-	chr4	118352656	118352748	ENSG00000164099.3	PRSS12	-	ATG	30	ENST00000296498.3	ENST00000296498.3.1
304	chr5:87267983-87268064:+	chr5	87267984	87268064	ENSG00000145715.14	RASA1	+	ATG	26	ENST00000274376.10	ENST00000274376.10.1
305	chr5:128537690-128539509:-	chr5	128537691	128539509	ENSG00000138829.11	FBN2	-	ATG	136	ENST00000508053.5	ENST00000508053.5.1
306	chr5:172006479-172006845:-	chr5	172006480	172006845	ENSG00000072803.17	FBXW11	-	ATG	121	ENST00000296933.10	ENST00000296933.10.1
307	chr6:47309695-47309842:-	chr6	47309696	47309842	ENSG00000146072.6	TNFRSF21	-	ATG	48	ENST00000296861.2	ENST00000296861.2.1
308	chr6:63572553-63572688:+	chr6	63572554	63572688	ENSG00000112245.10	PTP4A1	+	ATG	44	ENST00000370651.5	ENST00000370651.5.2
309	chr6:116571560-116571644:+	chr6	116571561	116571644	ENSG00000111832.12	RWDD1	+	ATG	27	ENST00000466444.6	ENST00000466444.6.1
310	chr6:112086594-112087486:-	chr6	112086595	112087486	ENSG00000074935.13	TUBE1	-	ATG	54	ENST00000368662.9	ENST00000368662.9.1
311	chr7:116672444-116672492:+	chr7	116672445	116672492	ENSG00000105976.14	MET	+	ATG	15	ENST00000397752.7	ENST00000397752.7.1
312	chr7:94394948-94394969:+	chr7	94394949	94394969	ENSG00000164692.17	COL1A2	+	ATG	6	ENST00000297268.10	ENST00000297268.10.1
313	chr7:149195498-149198397:+	chr7	149195499	149198397	ENSG00000170265.11	ZNF282	+	ATG	106	ENST00000610704.4	ENST00000610704.4.1
314	chr8:38997000-38997039:+	chr8	38997001	38997039	ENSG00000168615.11	ADAM9	+	ATG	12	ENST00000487273.6	ENST00000487273.6.1
315	chr8:118110960-118111215:-	chr8	118110961	118111215	ENSG00000182197.10	EXT1	-	ATG	84	ENST00000378204.6	ENST00000378204.6.1
316	chr9:36249204-36277042:-	chr9	36249205	36277042	ENSG00000159921.15	GNE	-	ATG	113	ENST00000396594.7	ENST00000396594.7.1
317	chr9:128420877-128421078:+	chr9	128420878	128421078	ENSG00000167123.18	CERCAM	+	ATG	66	ENST00000372842.5	ENST00000372842.5.1
318	chr9:137459131-137459278:-	chr9	137459132	137459278	ENSG00000165802.22	NSMF	-	ATG	48	ENST00000265663.12	ENST00000265663.12.1
319	chr10:12069008-12081475:+	chr10	12069009	12081475	ENSG00000181192.11	DHTKD1	+	ATG	60	ENST00000263035.8	ENST00000263035.8.1
320	chr10:33334597-33334663:-	chr10	33334598	33334663	ENSG00000099250.17	NRP1	-	ATG	21	ENST00000265371.8	ENST00000265371.8.1
321	chr10:73785586-73785946:+	chr10	73785587	73785946	ENSG00000214655.10	ZSWIM8	+	ATG	119	ENST00000604729.5	ENST00000604729.5.1
322	chr10:132537840-132537864:+	chr10	132537841	132537864	ENSG00000068383.18	INPP5A	+	ATG	7	ENST00000368594.7	ENST00000368594.7.1
323	chr11:68268065-68268251:-	chr11	68268066	68268251	ENSG00000171067.10	C11orf24	-	ATG	61	ENST00000304271.10	ENST00000304271.10.1
324	chr11:111540743-111543965:+	chr11	111540744	111543965	ENSG00000204381.11	LAYN	+	ATG	75	ENST00000375614.6	ENST00000375614.6.1
325	chr12:8949516-8949729:-	chr12	8949517	8949729	ENSG00000003056.7	M6PR	-	ATG	70	ENST00000000412.7	ENST00000000412.7.1
326	chr12:22046268-22046448:+	chr12	22046269	22046448	ENSG00000111726.12	CMAS	+	ATG	59	ENST00000229329.6	ENST00000229329.6.1
327	chr12:27332864-27368265:+	chr12	27332865	27368265	ENSG00000029153.14	ARNTL2	+	ATG	80	ENST00000544915.5	ENST00000544915.5.1
328	chr12:88580274-88580388:-	chr12	88580275	88580388	ENSG00000049130.15	KITLG	-	ATG	37	ENST00000347404.10	ENST00000347404.10.1
329	chr12:95217837-95217867:+	chr12	95217838	95217867	ENSG00000028203.17	VEZT	+	ATG	9	ENST00000436874.5	ENST00000436874.5.1
330	chr13:49669818-49691459:-	chr13	49669819	49691459	ENSG00000123179.13	EBPL	-	ATG	77	ENST00000242827.10	ENST00000242827.10.1
331	chr14:22982204-22982432:-	chr14	22982205	22982432	ENSG00000129474.15	AJUBA	-	ATG	75	ENST00000262713.6	ENST00000262713.6.1
332	chr14:23095193-23097732:+	chr14	23095194	23097732	ENSG00000179933.5	C14orf119	+	ATG	166	ENST00000319074.5	ENST00000319074.5.1
333	chr14:60092236-60092413:+	chr14	60092237	60092413	ENSG00000126773.12	PCNX4	+	ATG	58	ENST00000406949.5	ENST00000406949.5.1
334	chr14:96502411-96502447:+	chr14	96502412	96502447	ENSG00000090060.17	PAPOLA	+	ATG	11	ENST00000216277.12	ENST00000216277.12.1
335	chr15:74675127-74695984:-	chr15	74675128	74695984	ENSG00000179151.11	EDC3	-	ATG	39	ENST00000315127.8	ENST00000315127.8.1
336	chr15:100602693-100603038:+	chr15	100602694	100603038	ENSG00000183475.12	ASB7	+	ATG	114	ENST00000332783.11	ENST00000332783.11.1
337	chr15:101251542-101251914:-	chr15	101251543	101251914	ENSG00000131873.6	CHSY1	-	ATG	123	ENST00000254190.3	ENST00000254190.3.1
338	chr16:249600-254383:+	chr16	249601	254383	ENSG00000167930.15	FAM234A	+	ATG	18	ENST00000301679.6	ENST00000301679.6.1
339	chr16:77046-79465:+	chr16	77047	79465	ENSG00000103152.11	MPG	+	ATG	39	ENST00000436333.5	ENST00000436333.5.1
340	chr16:75464539-75464611:-	chr16	75464540	75464611	ENSG00000261717.5	RP11-77K12.1	-	ATG	23	ENST00000567194.5	ENST00000567194.5.1
341	chr17:4999896-5000223:+	chr17	4999897	5000223	ENSG00000129250.11	KIF1C	+	ATG	25	ENST00000320785.9	ENST00000320785.9.1
342	chr17:19003970-19004162:-	chr17	19003971	19004162	ENSG00000188522.14	FAM83G	-	ATG	63	ENST00000388995.10	ENST00000388995.10.1
343	chr17:43545275-43579331:-	chr17	43545276	43579331	ENSG00000175832.12	ETV4	-	ATG	80	ENST00000586764.1	ENST00000586764.1.1
344	chr17:49675906-49678068:-	chr17	49675907	49678068	ENSG00000121067.17	SPOP	-	ATG	81	ENST00000393328.6	ENST00000393328.6.1
345	chr18:74291847-74291961:-	chr18	74291848	74291961	ENSG00000166347.18	CYB5A	-	ATG	37	ENST00000340533.8	ENST00000340533.8.1
346	chr19:9435159-9435486:-	chr19	9435160	9435486	ENSG00000174652.17	ZNF266	-	ATG	78	ENST00000588221.5	ENST00000588221.5.1
347	chr19:17101692-17102163:+	chr19	17101693	17102163	ENSG00000099331.13	MYO9B	+	ATG	156	ENST00000595618.5	ENST00000595618.5.1
348	chr19:50376775-50377598:+	chr19	50376776	50377598	ENSG00000131408.13	NR1H2	+	ATG	20	ENST00000600355.5	ENST00000600355.5.1
349	chr19:50507676-50511158:-	chr19	50507677	50511158	ENSG00000161677.11	JOSD2	-	ATG	75	ENST00000598418.5	ENST00000598418.5.1
350	chr20:4015263-4015353:-	chr20	4015264	4015353	ENSG00000101236.16	RNF24	-	ATG	29	ENST00000336095.10	ENST00000336095.10.1
351	chr20:33993688-33993982:+	chr20	33993689	33993982	ENSG00000125970.11	RALY	+	ATG	97	ENST00000375114.7	ENST00000375114.7.1
352	chr22:28772686-28772959:+	chr22	28772687	28772959	ENSG00000159873.9	CCDC117	+	ATG	90	ENST00000249064.8	ENST00000249064.8.1
353	chr22:29603841-29603943:+	chr22	29603842	29603943	ENSG00000186575.17	NF2	+	ATG	33	ENST00000338641.8	ENST00000338641.8.1
354	chr22:38303197-38361430:-	chr22	38303198	38361430	ENSG00000283900.1	RP1-5O6.7	-	ATG	89	ENST00000400206.7	ENST00000400206.7.1
355	chr22:38700481-38700544:-	chr22	38700482	38700544	ENSG00000100221.10	JOSD1	-	ATG	20	ENST00000216039.9	ENST00000216039.9.1
356	chr22:39520746-39521528:+	chr22	39520747	39521528	ENSG00000128272.14	ATF4	+	ATG	59	ENST00000404241.6	ENST00000404241.6.1
357	chrX:103254011-103255199:-	chrX	103254012	103255199	ENSG00000180964.16	TCEAL8	-	ATG	66	ENST00000372685.7	ENST00000372685.7.1
358	chrX:135973623-135973947:-	chrX	135973624	135973947	ENSG00000169446.5	MMGT1	-	ATG	107	ENST00000305963.2	ENST00000305963.2.1
359	chrX:149505195-149505243:-	chrX	149505196	149505243	ENSG00000010404.17	IDS	-	ATG	15	ENST00000340855.10	ENST00000340855.10.1
360	chr1:1349127-1349286:-	chr1	1349128	1349286	ENSG00000107404.19	DVL1	-	ATG	52	ENST00000378888.9	ENST00000378888.9.1
361	chr1:50968787-50969330:+	chr1	50968788	50969330	ENSG00000123080.10	CDKN2C	+	ATG	180	ENST00000262662.5	ENST00000262662.5.1
362	chr1:93079300-93079336:+	chr1	93079301	93079336	ENSG00000143033.17	MTF2	+	ATG	11	ENST00000370298.8	ENST00000370298.8.1
363	chr1:161124502-161132625:-	chr1	161124503	161132625	ENSG00000158796.16	DEDD	-	ATG	43	ENST00000368006.7	ENST00000368006.7.1
364	chr1:185045496-185087593:+	chr1	185045497	185087593	ENSG00000121481.10	RNF2	+	ATG	64	ENST00000367510.7	ENST00000367510.7.1
365	chr1:227318016-227318043:-	chr1	227318017	227318043	ENSG00000143776.18	CDC42BPA	-	ATG	8	ENST00000366769.7	ENST00000366769.7.1
366	chr2:178480486-178480711:+	chr2	178480487	178480711	ENSG00000116095.10	PLEKHA3	+	ATG	74	ENST00000234453.9	ENST00000234453.9.1
367	chr2:226799328-226799523:-	chr2	226799329	226799523	ENSG00000169047.5	IRS1	-	ATG	64	ENST00000305123.5	ENST00000305123.5.1
368	chr3:33439969-33440104:-	chr3	33439970	33440104	ENSG00000153560.11	UBP1	-	ATG	44	ENST00000283629.7	ENST00000283629.7.1
369	chr3:44959432-44976117:-	chr3	44959433	44976117	ENSG00000163812.13	ZDHHC3	-	ATG	70	ENST00000296127.7	ENST00000296127.7.1
370	chr3:143120062-143120200:+	chr3	143120063	143120200	ENSG00000175040.5	CHST2	+	ATG	45	ENST00000309575.4	ENST00000309575.4.1
371	chr3:179347748-179347793:+	chr3	179347749	179347793	ENSG00000171109.18	MFN1	+	ATG	14	ENST00000471841.5	ENST00000471841.5.1
372	chr3:184314609-184314672:+	chr3	184314610	184314672	ENSG00000114867.20	EIF4G1	+	ATG	20	ENST00000346169.6	ENST00000346169.6.1
373	chr5:16935893-16935944:-	chr5	16935894	16935944	ENSG00000145555.14	MYO10	-	ATG	16	ENST00000513610.5	ENST00000513610.5.1
374	chr5:141637040-141637283:+	chr5	141637041	141637283	ENSG00000164620.8	RELL2	+	ATG	80	ENST00000297164.7	ENST00000297164.7.1
375	chr5:159209353-159209449:-	chr5	159209354	159209449	ENSG00000145860.11	RNF145	-	ATG	31	ENST00000424310.6	ENST00000424310.6.1
376	chr5:179801905-179806626:-	chr5	179801906	179806626	ENSG00000161013.16	MGAT4B	-	ATG	67	ENST00000292591.11	ENST00000292591.11.1
377	chr7:91264690-91264888:+	chr7	91264691	91264888	ENSG00000157240.3	FZD1	+	ATG	65	ENST00000287934.3	ENST00000287934.3.1
378	chr8:56993688-56993727:-	chr8	56993689	56993727	ENSG00000104331.8	IMPAD1	-	ATG	12	ENST00000262644.8	ENST00000262644.8.1
379	chr8:144490047-144490194:+	chr8	144490048	144490194	ENSG00000160972.9	PPP1R16A	+	ATG	48	ENST00000292539.8	ENST00000292539.8.1
380	chr9:120788274-120793252:-	chr9	120788275	120793252	ENSG00000119402.16	FBXW2	-	ATG	35	ENST00000608872.5	ENST00000608872.5.1
381	chr10:12195809-12195911:-	chr10	12195810	12195911	ENSG00000165609.12	NUDT5	-	ATG	33	ENST00000491614.5	ENST00000491614.5.1
382	chr10:84328665-84328710:+	chr10	84328666	84328710	ENSG00000107771.16	CCSER2	+	ATG	14	ENST00000372088.7	ENST00000372088.7.1
383	chr10:103450013-103452185:-	chr10	103450014	103452185	ENSG00000138172.10	CALHM2	-	ATG	71	ENST00000369788.7	ENST00000369788.7.1
384	chr11:6655615-6655663:-	chr11	6655616	6655663	ENSG00000166341.7	DCHS1	-	ATG	15	ENST00000299441.4	ENST00000299441.4.1
385	chr11:10808853-10808904:-	chr11	10808854	10808904	ENSG00000110321.16	EIF4G2	-	ATG	16	ENST00000339995.9	ENST00000339995.9.1
386	chr11:14499642-14499663:-	chr11	14499643	14499663	ENSG00000129083.12	COPB1	-	ATG	6	ENST00000249923.7	ENST00000249923.7.1
387	chr11:128694217-128758133:+	chr11	128694218	128758133	ENSG00000151702.16	FLI1	+	ATG	25	ENST00000527786.6	ENST00000527786.6.1
388	chr12:78864692-78977816:+	chr12	78864693	78977816	ENSG00000067715.13	SYT1	+	ATG	144	ENST00000261205.8	ENST00000261205.8.1
389	chr12:121400162-121400216:+	chr12	121400163	121400216	ENSG00000170633.16	RNF34	+	ATG	17	ENST00000392464.3	ENST00000392464.3.1
390	chr13:51584551-51675194:+	chr13	51584552	51675194	ENSG00000139668.8	WDFY2	+	ATG	121	ENST00000298125.6	ENST00000298125.6.1
391	chr14:55027274-55027349:+	chr14	55027275	55027349	ENSG00000180008.8	SOCS4	+	ATG	24	ENST00000395472.2	ENST00000395472.2.1
392	chr15:25438952-25438976:-	chr15	25438953	25438976	ENSG00000114062.18	UBE3A	-	ATG	7	ENST00000614096.4	ENST00000614096.4.1
393	chr15:39920015-39920174:-	chr15	39920016	39920174	ENSG00000166073.10	GPR176	-	ATG	52	ENST00000299092.3	ENST00000299092.3.1
394	chr15:43792239-43792380:+	chr15	43792240	43792380	ENSG00000140264.19	SERF2	+	ATG	46	ENST00000381359.5	ENST00000381359.5.1
395	chr15:72117827-72117902:-	chr15	72117828	72117902	ENSG00000066933.15	MYO9A	-	ATG	24	ENST00000356056.9	ENST00000356056.9.1
396	chr16:20862557-20900279:-	chr16	20862558	20900279	ENSG00000188215.9	DCUN1D3	-	ATG	53	ENST00000324344.8	ENST00000324344.8.1
397	chr16:29862928-29863342:-	chr16	29862929	29863342	ENSG00000103502.13	CDIPT	-	ATG	137	ENST00000219789.10	ENST00000219789.10.1
398	chr16:57245318-57246094:+	chr16	57245319	57246094	ENSG00000102931.7	ARL2BP	+	ATG	33	ENST00000219204.7	ENST00000219204.7.1
399	chr17:63827461-63829497:+	chr17	63827462	63829497	ENSG00000087191.12	PSMC5	+	ATG	42	ENST00000310144.10	ENST00000310144.10.1
400	chr19:17301134-17303246:-	chr19	17301135	17303246	ENSG00000127220.5	ABHD8	-	ATG	164	ENST00000247706.3	ENST00000247706.3.1
401	chr19:55600397-55602378:+	chr19	55600398	55602378	ENSG00000171443.6	ZNF524	+	ATG	104	ENST00000301073.3	ENST00000301073.3.1
402	chrX:154379382-154379442:+	chrX	154379383	154379442	ENSG00000102119.10	EMD	+	ATG	19	ENST00000369842.8	ENST00000369842.8.1
403	chr1:17005067-17011757:-	chr1	17005068	17011757	ENSG00000159363.17	ATP13A2	-	ATG	103	ENST00000452699.5	ENST00000452699.5.1
404	chr1:45552482-45552542:+	chr1	45552483	45552542	ENSG00000117448.13	AKR1A1	+	ATG	19	ENST00000372070.7	ENST00000372070.7.1
405	chr1:51519203-51519245:-	chr1	51519204	51519245	ENSG00000085832.16	EPS15	-	ATG	13	ENST00000371733.7	ENST00000371733.7.1
406	chr1:53946094-53946448:+	chr1	53946095	53946448	ENSG00000116212.14	LRRC42	+	ATG	117	ENST00000371370.7	ENST00000371370.7.1
407	chr1:113979516-113980064:+	chr1	113979517	113980064	ENSG00000116774.11	OLFML3	+	ATG	67	ENST00000369551.5	ENST00000369551.5.1
408	chr1:114757933-114757960:-	chr1	114757934	114757960	ENSG00000009307.15	CSDE1	-	ATG	8	ENST00000339438.10	ENST00000339438.10.1
409	chr1:154272679-154272727:+	chr1	154272680	154272727	ENSG00000143575.14	HAX1	+	ATG	15	ENST00000328703.11	ENST00000328703.11.1
410	chr1:154961593-154961638:-	chr1	154961594	154961638	ENSG00000163348.3	PYGO2	-	ATG	14	ENST00000368457.2	ENST00000368457.2.1
411	chr1:161118156-161119198:+	chr1	161118157	161119198	ENSG00000158793.13	NIT1	+	ATG	60	ENST00000368008.5	ENST00000368008.5.1
412	chr1:156282708-156282801:-	chr1	156282709	156282801	ENSG00000198952.8	SMG5	-	ATG	30	ENST00000361813.5	ENST00000361813.5.1
413	chr1:205631704-205631815:-	chr1	205631705	205631815	ENSG00000158711.13	ELK4	-	ATG	36	ENST00000357992.8	ENST00000357992.8.1
414	chr1:248825092-248825269:-	chr1	248825093	248825269	ENSG00000175137.10	SH3BP5L	-	ATG	58	ENST00000366472.5	ENST00000366472.5.1
415	chr2:38778194-38778278:+	chr2	38778195	38778278	ENSG00000152147.10	GEMIN6	+	ATG	27	ENST00000409011.5	ENST00000409011.5.1
416	chr2:224585287-224585335:-	chr2	224585288	224585335	ENSG00000036257.12	CUL3	-	ATG	15	ENST00000264414.8	ENST00000264414.8.1
417	chr3:37243176-37243461:+	chr3	37243177	37243461	ENSG00000144674.16	GOLGA4	+	ATG	94	ENST00000361924.6	ENST00000361924.6.1
418	chr3:100401905-100401998:+	chr3	100401906	100401998	ENSG00000206535.7	LNP1	+	ATG	30	ENST00000383693.7	ENST00000383693.7.1
419	chr3:168095442-168095559:-	chr3	168095443	168095559	ENSG00000173905.8	GOLIM4	-	ATG	38	ENST00000470487.5	ENST00000470487.5.1
420	chr3:177064989-177098468:-	chr3	177064990	177098468	ENSG00000177565.16	TBL1XR1	-	ATG	11	ENST00000430069.5	ENST00000430069.5.1
421	chr4:128809814-128831762:+	chr4	128809815	128831762	ENSG00000077684.15	JADE1	+	ATG	30	ENST00000452328.6	ENST00000452328.6.1
422	chr5:112976904-112985968:+	chr5	112976905	112985968	ENSG00000172795.15	DCP2	+	ATG	71	ENST00000389063.2	ENST00000389063.2.1
423	chr5:138331092-138337968:-	chr5	138331093	138337968	ENSG00000158402.18	CDC25C	-	ATG	44	ENST00000513970.5	ENST00000513970.5.1
424	chr5:150520900-150520966:+	chr5	150520901	150520966	ENSG00000070614.14	NDST1	+	ATG	21	ENST00000523767.5	ENST00000523767.5.1
425	chr5:176359831-176361895:-	chr5	176359832	176361895	ENSG00000122203.14	KIAA1191	-	ATG	126	ENST00000298569.8	ENST00000298569.8.2
426	chr5:180808913-180815524:-	chr5	180808914	180815524	ENSG00000131446.16	MGAT1	-	ATG	87	ENST00000333055.8	ENST00000333055.8.1
427	chr6:10749201-10749623:+	chr6	10749202	10749623	ENSG00000137210.13	TMEM14B	+	ATG	22	ENST00000467317.5	ENST00000467317.5.1
428	chr6:35347086-35347131:+	chr6	35347087	35347131	ENSG00000112033.13	PPARD	+	ATG	14	ENST00000311565.4	ENST00000311565.4.2
429	chr6:73309964-73310120:-	chr6	73309965	73310120	ENSG00000135314.12	KHDC1	-	ATG	51	ENST00000370384.7	ENST00000370384.7.1
430	chr7:6331214-6348758:-	chr7	6331215	6348758	ENSG00000178397.12	FAM220A	-	ATG	68	ENST00000313324.8	ENST00000313324.8.1
431	chr7:27740206-27740236:+	chr7	27740207	27740236	ENSG00000106052.13	TAX1BP1	+	ATG	9	ENST00000396319.6	ENST00000396319.6.1
432	chr7:32879821-32879914:-	chr7	32879822	32879914	ENSG00000170852.10	KBTBD2	-	ATG	30	ENST00000304056.8	ENST00000304056.8.1
433	chr8:85220333-85220354:-	chr8	85220334	85220354	ENSG00000176731.11	C8orf59	-	ATG	6	ENST00000619594.4	ENST00000619594.4.1
434	chr8:144517670-144517784:-	chr8	144517671	144517784	ENSG00000160957.12	RECQL4	-	ATG	37	ENST00000621189.4	ENST00000621189.4.1
435	chr8:144104624-144104747:+	chr8	144104625	144104747	ENSG00000179632.9	MAF1	+	ATG	40	ENST00000322428.9	ENST00000322428.9.1
436	chr9:38068658-38068700:-	chr9	38068659	38068700	ENSG00000107338.9	SHB	-	ATG	13	ENST00000377707.3	ENST00000377707.3.2
437	chr9:136808119-136808155:+	chr9	136808120	136808155	ENSG00000196642.18	RABL6	+	ATG	11	ENST00000311502.11	ENST00000311502.11.1
438	chr10:71964629-72005757:+	chr10	71964630	72005757	ENSG00000122863.5	CHST3	+	ATG	28	ENST00000373115.4	ENST00000373115.4.1
439	chr10:96586864-96586930:-	chr10	96586865	96586930	ENSG00000077147.14	TM9SF3	-	ATG	21	ENST00000371142.8	ENST00000371142.8.1
440	chr10:102643934-102644075:+	chr10	102643935	102644075	ENSG00000171206.14	TRIM8	+	ATG	46	ENST00000643721.1	ENST00000643721.1.1
441	chr11:10854992-10855049:-	chr11	10854993	10855049	ENSG00000236287.7	ZBED5	-	ATG	18	ENST00000432999.6	ENST00000432999.6.1
442	chr11:11621863-11621950:-	chr11	11621864	11621950	ENSG00000110328.5	GALNT18	-	ATG	28	ENST00000227756.4	ENST00000227756.4.1
443	chr11:57567941-57568193:-	chr11	57567942	57568193	ENSG00000156587.15	UBE2L6	-	ATG	83	ENST00000340573.8	ENST00000340573.8.1
444	chr11:61357752-61357815:-	chr11	61357753	61357815	ENSG00000162144.9	CYB561A3	-	ATG	20	ENST00000294072.8	ENST00000294072.8.1
445	chr11:61362073-61364264:+	chr11	61362074	61364264	ENSG00000149483.11	TMEM138	+	ATG	119	ENST00000278826.10	ENST00000278826.10.2
446	chr11:70405280-70405331:+	chr11	70405281	70405331	ENSG00000085733.15	CTTN	+	ATG	16	ENST00000346329.7	ENST00000346329.7.1
447	chr11:125569470-125569539:+	chr11	125569471	125569539	ENSG00000149547.14	EI24	+	ATG	22	ENST00000278903.10	ENST00000278903.10.1
448	chr12:753275-753431:+	chr12	753276	753431	ENSG00000060237.16	WNK1	+	ATG	51	ENST00000535572.5	ENST00000535572.5.1
449	chr12:56257885-56258294:-	chr12	56257886	56258294	ENSG00000139645.9	ANKRD52	-	ATG	25	ENST00000267116.7	ENST00000267116.7.1
450	chr13:29849925-29850012:-	chr13	29849926	29850012	ENSG00000122042.9	UBL3	-	ATG	28	ENST00000380680.4	ENST00000380680.4.1
451	chr13:52028444-52028525:+	chr13	52028445	52028525	ENSG00000253797.2	UTP14C	+	ATG	26	ENST00000521776.2	ENST00000521776.2.2
452	chr14:22872185-22872257:+	chr14	22872186	22872257	ENSG00000197324.8	LRP10	+	ATG	23	ENST00000359591.8	ENST00000359591.8.1
453	chr15:50648801-50686717:-	chr15	50648802	50686717	ENSG00000092439.14	TRPM7	-	ATG	129	ENST00000313478.11	ENST00000313478.11.1
454	chr15:81001988-81002279:+	chr15	81001989	81002279	ENSG00000140406.3	MESDC1	+	ATG	96	ENST00000267984.3	ENST00000267984.3.3
455	chr16:30925868-30930145:+	chr16	30925869	30930145	ENSG00000099364.16	FBXL19	+	ATG	249	ENST00000471231.6	ENST00000471231.6.1
456	chr16:57186339-57204535:+	chr16	57186340	57204535	ENSG00000159579.13	RSPRY1	+	ATG	47	ENST00000394420.8	ENST00000394420.8.2
457	chr16:70800929-70801004:-	chr16	70800930	70801004	ENSG00000103043.14	VAC14	-	ATG	24	ENST00000261776.9	ENST00000261776.9.1
458	chr16:84116750-84116810:-	chr16	84116751	84116810	ENSG00000140943.16	MBTPS1	-	ATG	19	ENST00000343411.7	ENST00000343411.7.2
459	chr16:85750944-85751064:-	chr16	85750945	85751064	ENSG00000154102.10	C16orf74	-	ATG	39	ENST00000602719.5	ENST00000602719.5.1
460	chr17:68248451-68248553:+	chr17	68248452	68248553	ENSG00000196704.11	AMZ2	+	ATG	33	ENST00000359904.7	ENST00000359904.7.1
461	chr17:75471835-75485905:+	chr17	75471836	75485905	ENSG00000177728.16	KIAA0195	+	ATG	82	ENST00000577380.5	ENST00000577380.5.1
462	chr19:10500010-10503551:-	chr19	10500011	10503551	ENSG00000079999.13	KEAP1	-	ATG	126	ENST00000171111.9	ENST00000171111.9.1
463	chr19:15418919-15419048:-	chr19	15418920	15419048	ENSG00000011243.17	AKAP8L	-	ATG	42	ENST00000397410.9	ENST00000397410.9.1
464	chr19:48872454-48872523:+	chr19	48872455	48872523	ENSG00000087074.7	PPP1R15A	+	ATG	22	ENST00000200453.5	ENST00000200453.5.2
465	chr20:50903959-50928818:-	chr20	50903960	50928818	ENSG00000101126.16	ADNP	-	ATG	69	ENST00000396029.8	ENST00000396029.8.1
466	chr22:19431602-19431695:-	chr22	19431603	19431695	ENSG00000100084.14	HIRA	-	ATG	30	ENST00000263208.5	ENST00000263208.5.1
467	chr22:49853922-49883437:+	chr22	49853923	49883437	ENSG00000100426.6	ZBED4	+	ATG	56	ENST00000216268.5	ENST00000216268.5.1
468	chrX:48476241-48476274:+	chrX	48476242	48476274	ENSG00000068438.14	FTSJ1	+	ATG	10	ENST00000348411.2	ENST00000348411.2.1
469	chrX:49171995-49173144:+	chrX	49171996	49173144	ENSG00000102007.10	PLP2	+	ATG	38	ENST00000376327.5	ENST00000376327.5.1
470	chr22:40552165-40552297:-	chr22	40552166	40552297	ENSG00000196588.15	MKL1	-	ATG	43	ENST00000355630.7	ENST00000355630.7.1
471	chr1:1407245-1407275:-	chr1	1407246	1407275	ENSG00000242485.5	MRPL20	-	ATG	9	ENST00000344843.11	ENST00000344843.11.1
472	chr1:1839195-1839228:-	chr1	1839196	1839228	ENSG00000078369.17	GNB1	-	ATG	10	ENST00000378609.8	ENST00000378609.8.1
473	chr1:17054033-17054087:-	chr1	17054034	17054087	ENSG00000117118.9	SDHB	-	ATG	17	ENST00000375499.7	ENST00000375499.7.1
474	chr1:22451909-22490147:+	chr1	22451910	22490147	ENSG00000184677.16	ZBTB40	+	ATG	120	ENST00000375647.4	ENST00000375647.4.1
475	chr1:25338328-25338385:+	chr1	25338329	25338385	ENSG00000183726.10	TMEM50A	+	ATG	18	ENST00000374358.4	ENST00000374358.4.1
476	chr1:26306603-26306627:-	chr1	26306604	26306627	ENSG00000158062.20	UBXN11	-	ATG	7	ENST00000374222.5	ENST00000374222.5.1
477	chr1:25823028-25823747:+	chr1	25823029	25823747	ENSG00000117640.17	MTFR1L	+	ATG	67	ENST00000474295.5	ENST00000474295.5.1
478	chr1:27490097-27490145:-	chr1	27490098	27490145	ENSG00000158195.10	WASF2	-	ATG	15	ENST00000618852.4	ENST00000618852.4.1
479	chr1:29216766-29230906:-	chr1	29216767	29230906	ENSG00000116353.15	MECR	-	ATG	73	ENST00000373791.7	ENST00000373791.7.1
480	chr1:31764197-31764248:-	chr1	31764198	31764248	ENSG00000121753.12	ADGRB2	-	ATG	16	ENST00000398542.5	ENST00000398542.5.1
481	chr1:31919562-31938010:-	chr1	31919563	31938010	ENSG00000184007.19	PTP4A2	-	ATG	39	ENST00000647444.1	ENST00000647444.1.1
482	chr1:36156333-36156387:+	chr1	36156334	36156387	ENSG00000116871.15	MAP7D1	+	ATG	17	ENST00000316156.8	ENST00000316156.8.1
483	chr1:36259387-36259483:+	chr1	36259388	36259483	ENSG00000054118.13	THRAP3	+	ATG	31	ENST00000354618.9	ENST00000354618.9.1
484	chr1:36394088-36397776:-	chr1	36394089	36397776	ENSG00000181817.5	LSM10	-	ATG	24	ENST00000315732.2	ENST00000315732.2.2
485	chr1:32817299-32817353:-	chr1	32817300	32817353	ENSG00000134684.10	YARS	-	ATG	17	ENST00000373477.8	ENST00000373477.8.1
486	chr1:35931422-35945764:+	chr1	35931423	35945764	ENSG00000126070.19	AGO3	+	ATG	31	ENST00000373191.8	ENST00000373191.8.1
487	chr1:37857671-37859588:-	chr1	37857672	37859588	ENSG00000188786.9	MTF1	-	ATG	31	ENST00000373036.4	ENST00000373036.4.1
488	chr1:40979736-40979817:+	chr1	40979737	40979817	ENSG00000171793.13	CTPS1	+	ATG	26	ENST00000372621.8	ENST00000372621.8.1
489	chr1:41242087-41242108:-	chr1	41242088	41242108	ENSG00000010803.16	SCMH1	-	ATG	6	ENST00000372596.5	ENST00000372596.5.1
490	chr1:43365267-43368009:-	chr1	43365268	43368009	ENSG00000066322.14	ELOVL1	-	ATG	87	ENST00000372458.7	ENST00000372458.7.1
491	chr1:43531062-43538253:+	chr1	43531063	43538253	ENSG00000142949.16	PTPRF	+	ATG	27	ENST00000359947.8	ENST00000359947.8.1
492	chr1:54200201-54200228:+	chr1	54200202	54200228	ENSG00000116221.15	MRPL37	+	ATG	8	ENST00000605337.5	ENST00000605337.5.1
493	chr1:62803761-62803809:+	chr1	62803762	62803809	ENSG00000125703.14	ATG4C	+	ATG	15	ENST00000371120.7	ENST00000371120.7.1
494	chr1:66925028-66928889:+	chr1	66925029	66928889	ENSG00000198160.14	MIER1	+	ATG	56	ENST00000357692.6	ENST00000357692.6.1
495	chr1:74733176-74733233:+	chr1	74733177	74733233	ENSG00000162623.15	TYW3	+	ATG	18	ENST00000370867.7	ENST00000370867.7.1
496	chr1:86914149-86914248:-	chr1	86914150	86914248	ENSG00000183291.15	SEP15	-	ATG	32	ENST00000331835.9	ENST00000331835.9.1
497	chr1:100888796-100894756:-	chr1	100888797	100894756	ENSG00000162694.13	EXTL2	-	ATG	51	ENST00000370114.7	ENST00000370114.7.1
498	chr1:100038116-100038155:+	chr1	100038117	100038155	ENSG00000156875.13	MFSD14A	+	ATG	12	ENST00000370152.7	ENST00000370152.7.1
499	chr1:108885276-108885297:+	chr1	108885277	108885297	ENSG00000121957.13	GPSM2	+	ATG	6	ENST00000406462.6	ENST00000406462.6.1
500	chr1:111139633-111139705:-	chr1	111139634	111139705	ENSG00000156171.14	DRAM2	-	ATG	23	ENST00000286692.8	ENST00000286692.8.1
501	chr1:113905210-113905438:+	chr1	113905211	113905438	ENSG00000118655.4	DCLRE1B	+	ATG	75	ENST00000369563.3	ENST00000369563.3.1
502	chr1:114750173-114750206:-	chr1	114750174	114750206	ENSG00000009307.15	CSDE1	-	ATG	10	ENST00000339438.10	ENST00000339438.10.2
503	chr1:86387031-86387076:-	chr1	86387032	86387076	ENSG00000122417.15	ODF2L	-	ATG	14	ENST00000359242.7	ENST00000359242.7.1
504	chr1:117929487-117929520:-	chr1	117929488	117929520	ENSG00000196505.10	GDAP2	-	ATG	10	ENST00000369443.9	ENST00000369443.9.1
505	chr1:148640061-148679580:-	chr1	148640062	148679580	ENSG00000270629.5	NBPF14	-	ATG	48	ENST00000606877.2	ENST00000606877.2.1
506	chr1:150235976-150236063:-	chr1	150235977	150236063	ENSG00000143401.14	ANP32E	-	ATG	28	ENST00000583931.5	ENST00000583931.5.1
507	chr1:150236092-150236122:-	chr1	150236093	150236122	ENSG00000143401.14	ANP32E	-	ATG	9	ENST00000583931.5	ENST00000583931.5.2
508	chr1:116666735-116666852:-	chr1	116666736	116666852	ENSG00000143061.17	IGSF3	-	ATG	38	ENST00000369486.7	ENST00000369486.7.1
509	chr1:151327332-151327362:-	chr1	151327333	151327362	ENSG00000143393.16	PI4KB	-	ATG	9	ENST00000368874.8	ENST00000368874.8.1
510	chr1:151198654-151198732:+	chr1	151198655	151198732	ENSG00000143398.19	PIP5K1A	+	ATG	25	ENST00000349792.9	ENST00000349792.9.1
511	chr1:154220521-154220560:-	chr1	154220522	154220560	ENSG00000143612.19	C1orf43	-	ATG	12	ENST00000350592.7	ENST00000350592.7.1
512	chr1:120029962-120069461:-	chr1	120029963	120069461	ENSG00000134250.19	NOTCH2	-	ATG	50	ENST00000256646.6	ENST00000256646.6.1
513	chr1:153977528-153977570:-	chr1	153977529	153977570	ENSG00000143543.14	JTB	-	ATG	13	ENST00000271843.8	ENST00000271843.8.1
514	chr1:156282953-156285188:+	chr1	156282954	156285188	ENSG00000163472.18	TMEM79	+	ATG	38	ENST00000295694.9	ENST00000295694.9.1
515	chr1:161045937-161045964:-	chr1	161045938	161045964	ENSG00000158773.14	USF1	-	ATG	8	ENST00000368021.7	ENST00000368021.7.1
516	chr1:160098414-160098546:-	chr1	160098415	160098546	ENSG00000162729.13	IGSF8	-	ATG	43	ENST00000368086.5	ENST00000368086.5.1
517	chr1:161226009-161226132:+	chr1	161226010	161226132	ENSG00000158882.14	TOMM40L	+	ATG	40	ENST00000367988.7	ENST00000367988.7.1
518	chr1:161177443-161177485:-	chr1	161177444	161177485	ENSG00000158850.14	B4GALT3	-	ATG	13	ENST00000367998.5	ENST00000367998.5.1
519	chr1:162561683-162566079:+	chr1	162561684	162566079	ENSG00000117143.13	UAP1	+	ATG	53	ENST00000367926.8	ENST00000367926.8.1
520	chr1:167936712-167936784:+	chr1	167936713	167936784	ENSG00000143164.15	DCAF6	+	ATG	23	ENST00000367843.7	ENST00000367843.7.1
521	chr1:178725299-178725341:+	chr1	178725300	178725341	ENSG00000116191.17	RALGPS2	+	ATG	13	ENST00000367635.7	ENST00000367635.7.1
522	chr1:179882315-179882393:+	chr1	179882316	179882393	ENSG00000143337.18	TOR1AIP1	+	ATG	25	ENST00000606911.6	ENST00000606911.6.1
523	chr1:179954824-179954854:+	chr1	179954825	179954854	ENSG00000135837.15	CEP350	+	ATG	9	ENST00000367607.7	ENST00000367607.7.1
524	chr1:184477501-184507629:+	chr1	184477502	184507629	ENSG00000116667.12	C1orf21	+	ATG	47	ENST00000235307.6	ENST00000235307.6.1
525	chr1:203128314-203129005:+	chr1	203128315	203129005	ENSG00000163485.16	ADORA1	+	ATG	112	ENST00000309502.7	ENST00000309502.7.1
526	chr1:203626852-203626888:+	chr1	203626853	203626888	ENSG00000058668.14	ATP2B4	+	ATG	11	ENST00000357681.9	ENST00000357681.9.1
527	chr1:203796508-203796694:+	chr1	203796509	203796694	ENSG00000058673.16	ZC3H11A	+	ATG	61	ENST00000639812.1	ENST00000639812.1.1
528	chr1:205664689-205664788:-	chr1	205664690	205664788	ENSG00000158715.5	SLC45A3	-	ATG	32	ENST00000367145.3	ENST00000367145.3.1
529	chr1:206897739-206897790:+	chr1	206897740	206897790	ENSG00000162892.15	IL24	+	ATG	16	ENST00000367093.3	ENST00000367093.3.1
530	chr1:206897469-206897520:+	chr1	206897470	206897520	ENSG00000162892.15	IL24	+	ATG	16	ENST00000367093.3	ENST00000367093.3.2
531	chr1:205811032-205812896:-	chr1	205811033	205812896	ENSG00000133065.10	SLC41A1	-	ATG	47	ENST00000367137.3	ENST00000367137.3.1
532	chr1:207752090-207752192:+	chr1	207752091	207752192	ENSG00000117335.19	CD46	+	ATG	33	ENST00000367047.5	ENST00000367047.5.1
533	chr1:235328606-235328657:+	chr1	235328607	235328657	ENSG00000152904.11	GGPS1	+	ATG	16	ENST00000282841.9	ENST00000282841.9.2
534	chr1:244653168-244653210:+	chr1	244653169	244653210	ENSG00000121644.18	DESI2	+	ATG	13	ENST00000302550.15	ENST00000302550.15.1
535	chr1:247330020-247331607:-	chr1	247330021	247331607	ENSG00000162714.12	ZNF496	-	ATG	78	ENST00000294753.8	ENST00000294753.8.1
536	chr2:8837526-8837592:-	chr2	8837527	8837592	ENSG00000134313.15	KIDINS220	-	ATG	21	ENST00000256707.7	ENST00000256707.7.1
537	chr2:10448350-10448377:-	chr2	10448351	10448377	ENSG00000115758.12	ODC1	-	ATG	8	ENST00000234111.8	ENST00000234111.8.1
538	chr2:20447110-20447149:+	chr2	20447111	20447149	ENSG00000143878.9	RHOB	+	ATG	12	ENST00000272233.5	ENST00000272233.5.1
539	chr2:25878394-25878448:-	chr2	25878395	25878448	ENSG00000143970.16	ASXL2	-	ATG	17	ENST00000435504.8	ENST00000435504.8.1
540	chr2:24793409-24799726:+	chr2	24793410	24799726	ENSG00000138092.10	CENPO	+	ATG	47	ENST00000473706.5	ENST00000473706.5.1
541	chr2:27211485-27212205:-	chr2	27211486	27212205	ENSG00000138074.14	SLC5A6	-	ATG	77	ENST00000310574.7	ENST00000310574.7.1
542	chr2:27212028-27212094:+	chr2	27212029	27212094	ENSG00000138085.16	ATRAID	+	ATG	21	ENST00000380171.7	ENST00000380171.7.1
543	chr2:42494691-42494799:+	chr2	42494692	42494799	ENSG00000057935.13	MTA3	+	ATG	35	ENST00000405592.5	ENST00000405592.5.1
544	chr2:32277912-32277981:+	chr2	32277913	32277981	ENSG00000119820.10	YIPF4	+	ATG	22	ENST00000238831.8	ENST00000238831.8.1
545	chr2:33599234-33599351:-	chr2	33599235	33599351	ENSG00000119812.18	FAM98A	-	ATG	38	ENST00000238823.12	ENST00000238823.12.1
546	chr2:61145127-61162862:+	chr2	61145128	61162862	ENSG00000237651.6	C2orf74	+	ATG	29	ENST00000426997.5	ENST00000426997.5.1
547	chr2:64653757-64653796:-	chr2	64653758	64653796	ENSG00000179833.4	SERTAD2	-	ATG	12	ENST00000313349.3	ENST00000313349.3.1
548	chr2:71068683-71070744:+	chr2	71068684	71070744	ENSG00000124357.12	NAGK	+	ATG	10	ENST00000418807.7	ENST00000418807.7.1
549	chr2:74482860-74483013:-	chr2	74482861	74483013	ENSG00000135637.13	CCDC142	-	ATG	50	ENST00000393965.7	ENST00000393965.7.1
550	chr2:74421750-74422302:+	chr2	74421751	74422302	ENSG00000005448.16	WDR54	+	ATG	71	ENST00000348227.4	ENST00000348227.4.1
551	chr2:96637155-96637176:-	chr2	96637156	96637176	ENSG00000114982.17	KANSL3	-	ATG	6	ENST00000431828.5	ENST00000431828.5.1
552	chr2:132416878-132417157:+	chr2	132416879	132417157	ENSG00000183840.6	GPR39	+	ATG	92	ENST00000329321.3	ENST00000329321.3.1
553	chr2:134254265-134254310:+	chr2	134254266	134254310	ENSG00000152127.8	MGAT5	+	ATG	14	ENST00000409645.5	ENST00000409645.5.1
554	chr2:149587666-149587714:-	chr2	149587667	149587714	ENSG00000168288.12	MMADHC	-	ATG	15	ENST00000303319.9	ENST00000303319.9.1
555	chr2:151828232-151828403:-	chr2	151828233	151828403	ENSG00000162980.16	ARL5A	-	ATG	56	ENST00000295087.12	ENST00000295087.12.1
556	chr2:169573741-169573798:-	chr2	169573742	169573798	ENSG00000138399.17	FASTKD1	-	ATG	18	ENST00000453153.6	ENST00000453153.6.1
557	chr2:200811646-200811694:+	chr2	200811647	200811694	ENSG00000082153.17	BZW1	+	ATG	15	ENST00000409600.5	ENST00000409600.5.1
558	chr2:201420644-201451365:-	chr2	201420645	201451365	ENSG00000115993.12	TRAK2	-	ATG	25	ENST00000332624.7	ENST00000332624.7.1
559	chr2:206765614-206765653:+	chr2	206765615	206765653	ENSG00000118246.13	FASTKD2	+	ATG	12	ENST00000236980.10	ENST00000236980.10.1
560	chr2:202911915-202912002:-	chr2	202911916	202912002	ENSG00000138442.9	WDR12	-	ATG	28	ENST00000261015.4	ENST00000261015.4.1
561	chr2:208271514-208271619:+	chr2	208271515	208271619	ENSG00000115020.16	PIKFYVE	+	ATG	34	ENST00000264380.8	ENST00000264380.8.1
562	chr2:218568851-218568896:+	chr2	218568852	218568896	ENSG00000144580.13	RQCD1	+	ATG	14	ENST00000273064.10	ENST00000273064.10.1
563	chr2:219245985-219246679:+	chr2	219245986	219246679	ENSG00000115661.13	STK16	+	ATG	40	ENST00000409638.7	ENST00000409638.7.2
564	chr2:227328735-227328756:+	chr2	227328736	227328756	ENSG00000168958.19	MFF	+	ATG	6	ENST00000304593.13	ENST00000304593.13.1
565	chr3:9649540-9649564:+	chr3	9649541	9649564	ENSG00000163719.19	MTMR14	+	ATG	7	ENST00000353332.9	ENST00000353332.9.1
566	chr3:10249041-10249366:+	chr3	10249042	10249366	ENSG00000157014.10	TATDN2	+	ATG	65	ENST00000287652.8	ENST00000287652.8.1
567	chr3:5187782-5187944:+	chr3	5187783	5187944	ENSG00000134109.10	EDEM1	+	ATG	53	ENST00000256497.8	ENST00000256497.8.1
568	chr3:38630413-38633315:-	chr3	38630414	38633315	ENSG00000183873.15	SCN5A	-	ATG	98	ENST00000413689.5	ENST00000413689.5.1
569	chr3:42568978-42601044:-	chr3	42568979	42601044	ENSG00000093183.13	SEC22C	-	ATG	59	ENST00000417572.5	ENST00000417572.5.1
570	chr3:33440133-33440184:-	chr3	33440134	33440184	ENSG00000153560.11	UBP1	-	ATG	16	ENST00000283629.7	ENST00000283629.7.2
571	chr3:43081451-43081517:-	chr3	43081452	43081517	ENSG00000144647.5	POMGNT2	-	ATG	21	ENST00000344697.2	ENST00000344697.2.1
572	chr3:44338723-44354798:+	chr3	44338724	44354798	ENSG00000179152.19	TCAIM	+	ATG	56	ENST00000342649.8	ENST00000342649.8.1
573	chr3:45985003-45995804:-	chr3	45985004	45995804	ENSG00000163820.14	FYCO1	-	ATG	33	ENST00000296137.6	ENST00000296137.6.1
574	chr3:45388589-45388631:+	chr3	45388590	45388631	ENSG00000011376.10	LARS2	+	ATG	13	ENST00000415258.5	ENST00000415258.5.1
575	chr3:47443039-47443081:-	chr3	47443040	47443081	ENSG00000114650.18	SCAP	-	ATG	13	ENST00000265565.9	ENST00000265565.9.1
576	chr3:49411921-49412089:-	chr3	49411922	49412089	ENSG00000067560.10	RHOA	-	ATG	55	ENST00000418115.5	ENST00000418115.5.1
577	chr3:49426408-49429306:-	chr3	49426409	49429306	ENSG00000283189.2	RP11-949J7.8	-	ATG	72	ENST00000636166.1	ENST00000636166.1.1
578	chr3:50328141-50328165:-	chr3	50328142	50328165	ENSG00000114383.9	TUSC2	-	ATG	7	ENST00000232496.4	ENST00000232496.4.1
579	chr3:50292303-50292483:-	chr3	50292304	50292483	ENSG00000214706.10	IFRD2	-	ATG	41	ENST00000436390.5	ENST00000436390.5.1
580	chr3:51590394-51627693:+	chr3	51590395	51627693	ENSG00000164080.13	RAD54L2	+	ATG	101	ENST00000409535.6	ENST00000409535.6.1
581	chr3:52409874-52410099:-	chr3	52409875	52410099	ENSG00000163930.9	BAP1	-	ATG	74	ENST00000460680.5	ENST00000460680.5.1
582	chr3:52969226-53046065:-	chr3	52969227	53046065	ENSG00000163935.13	SFMBT1	-	ATG	93	ENST00000394752.7	ENST00000394752.7.1
583	chr3:87227522-87245727:+	chr3	87227523	87245727	ENSG00000083937.8	CHMP2B	+	ATG	15	ENST00000471660.5	ENST00000471660.5.1
584	chr3:97764778-97764880:+	chr3	97764779	97764880	ENSG00000113966.9	ARL6	+	ATG	33	ENST00000463745.5	ENST00000463745.5.1
585	chr3:112562062-112562236:+	chr3	112562063	112562236	ENSG00000138459.8	SLC35A5	+	ATG	57	ENST00000492406.5	ENST00000492406.5.1
586	chr3:119236963-119237056:-	chr3	119236964	119237056	ENSG00000121578.12	B4GALT4	-	ATG	30	ENST00000393765.6	ENST00000393765.6.1
587	chr3:107526337-107645906:+	chr3	107526338	107645906	ENSG00000114439.18	BBX	+	ATG	43	ENST00000415149.6	ENST00000415149.6.1
588	chr3:124887128-124887167:-	chr3	124887129	124887167	ENSG00000082781.11	ITGB5	-	ATG	12	ENST00000296181.8	ENST00000296181.8.1
589	chr3:130850770-130850905:+	chr3	130850771	130850905	ENSG00000017260.19	ATP2C1	+	ATG	44	ENST00000504381.5	ENST00000504381.5.1
590	chr3:136752324-136752363:-	chr3	136752325	136752363	ENSG00000118007.12	STAG1	-	ATG	12	ENST00000236698.9	ENST00000236698.9.1
591	chr3:136819291-136819342:+	chr3	136819292	136819342	ENSG00000168917.8	SLC35G2	+	ATG	16	ENST00000446465.2	ENST00000446465.2.1
592	chr3:141368672-141368720:+	chr3	141368673	141368720	ENSG00000177311.11	ZBTB38	+	ATG	15	ENST00000509842.5	ENST00000509842.5.1
593	chr3:149812901-149813291:+	chr3	149812902	149813291	ENSG00000082996.19	RNF13	+	ATG	129	ENST00000392894.7	ENST00000392894.7.1
594	chr3:152268948-152268990:+	chr3	152268949	152268990	ENSG00000152601.17	MBNL1	+	ATG	13	ENST00000355460.6	ENST00000355460.6.2
595	chr3:160399526-160399616:+	chr3	160399527	160399616	ENSG00000113810.15	SMC4	+	ATG	29	ENST00000357388.7	ENST00000357388.7.1
596	chr3:167720157-167720211:-	chr3	167720158	167720211	ENSG00000114209.14	PDCD10	-	ATG	17	ENST00000392750.6	ENST00000392750.6.1
597	chr3:180988213-180989646:-	chr3	180988214	180989646	ENSG00000205981.7	DNAJC19	-	ATG	20	ENST00000382564.7	ENST00000382564.7.1
598	chr3:182793507-182793579:+	chr3	182793508	182793579	ENSG00000058063.15	ATP11B	+	ATG	23	ENST00000323116.9	ENST00000323116.9.1
599	chr3:172750732-172750807:+	chr3	172750733	172750807	ENSG00000114346.13	ECT2	+	ATG	24	ENST00000232458.9	ENST00000232458.9.1
600	chr3:183884746-183884869:-	chr3	183884747	183884869	ENSG00000283765.1	RP11-449K6.5	-	ATG	40	ENST00000639401.1	ENST00000639401.1.1
601	chr3:184014433-184017956:-	chr3	184014434	184017956	ENSG00000114770.16	ABCC5	-	ATG	46	ENST00000334444.10	ENST00000334444.10.1
602	chr3:184315496-184315800:+	chr3	184315497	184315800	ENSG00000114867.20	EIF4G1	+	ATG	28	ENST00000346169.6	ENST00000346169.6.2
603	chr4:4248010-4248202:-	chr4	4248011	4248202	ENSG00000132406.11	TMEM128	-	ATG	63	ENST00000254742.6	ENST00000254742.6.1
604	chr4:1721083-1721245:-	chr4	1721084	1721245	ENSG00000168936.10	TMEM129	-	ATG	53	ENST00000303277.6	ENST00000303277.6.1
605	chr4:3074700-3074766:+	chr4	3074701	3074766	ENSG00000197386.11	HTT	+	ATG	21	ENST00000355072.10	ENST00000355072.10.1
606	chr4:44678570-44678603:+	chr4	44678571	44678603	ENSG00000151806.13	GUF1	+	ATG	10	ENST00000281543.5	ENST00000281543.5.1
607	chr4:48341491-48341551:+	chr4	48341492	48341551	ENSG00000109171.14	SLAIN2	+	ATG	19	ENST00000264313.10	ENST00000264313.10.2
608	chr4:55489407-55489452:-	chr4	55489408	55489452	ENSG00000134852.14	CLOCK	-	ATG	14	ENST00000513440.5	ENST00000513440.5.1
609	chr4:52659186-52659213:-	chr4	52659187	52659213	ENSG00000109189.12	USP46	-	ATG	8	ENST00000441222.7	ENST00000441222.7.1
610	chr4:52745896-52751611:-	chr4	52745897	52751611	ENSG00000226887.7	ERVMER34-1	-	ATG	151	ENST00000443173.5	ENST00000443173.5.1
611	chr4:54064449-54064503:-	chr4	54064450	54064503	ENSG00000109220.10	CHIC2	-	ATG	17	ENST00000263921.7	ENST00000263921.7.1
612	chr4:70688500-70688536:+	chr4	70688501	70688536	ENSG00000132467.3	UTP3	+	ATG	11	ENST00000254803.3	ENST00000254803.3.1
613	chr4:75724609-75724714:+	chr4	75724610	75724714	ENSG00000138768.14	USO1	+	ATG	34	ENST00000264904.8	ENST00000264904.8.1
614	chr4:72569077-72569122:-	chr4	72569078	72569122	ENSG00000156140.9	ADAMTS3	-	ATG	14	ENST00000286657.9	ENST00000286657.9.1
615	chr4:83455710-83455752:-	chr4	83455711	83455752	ENSG00000163312.10	HELQ	-	ATG	13	ENST00000295488.7	ENST00000295488.7.1
616	chr4:99088702-99088735:-	chr4	99088703	99088735	ENSG00000197894.10	ADH5	-	ATG	10	ENST00000296412.12	ENST00000296412.12.1
617	chr4:102344756-102344852:-	chr4	102344757	102344852	ENSG00000138821.12	SLC39A8	-	ATG	31	ENST00000424970.6	ENST00000424970.6.1
618	chr4:112231822-112231903:+	chr4	112231823	112231903	ENSG00000138660.11	AP1AR	+	ATG	26	ENST00000274000.9	ENST00000274000.9.1
619	chr4:112818124-112904458:+	chr4	112818125	112904458	ENSG00000145362.17	ANK2	+	ATG	47	ENST00000506722.5	ENST00000506722.5.1
620	chr4:99950301-99950346:-	chr4	99950302	99950346	ENSG00000164032.11	H2AFZ	-	ATG	14	ENST00000296417.5	ENST00000296417.5.1
621	chr4:129093185-129093236:-	chr4	129093186	129093236	ENSG00000151466.11	SCLT1	-	ATG	16	ENST00000281142.9	ENST00000281142.9.1
622	chr4:138242281-138242341:-	chr4	138242282	138242341	ENSG00000151012.13	SLC7A11	-	ATG	19	ENST00000280612.9	ENST00000280612.9.1
623	chr4:147617623-147617659:+	chr4	147617624	147617659	ENSG00000164168.7	TMEM184C	+	ATG	11	ENST00000508208.5	ENST00000508208.5.1
624	chr4:184649397-184649424:-	chr4	184649398	184649424	ENSG00000164305.18	CASP3	-	ATG	8	ENST00000523916.5	ENST00000523916.5.1
625	chr4:169621000-169635939:+	chr4	169621001	169635939	ENSG00000109572.13	CLCN3	+	ATG	29	ENST00000513761.5	ENST00000513761.5.1
626	chr5:14769084-14871478:-	chr5	14769085	14871478	ENSG00000154122.13	ANKH	-	ATG	77	ENST00000284268.7	ENST00000284268.7.1
627	chr5:32174130-32174184:-	chr5	32174131	32174184	ENSG00000113384.13	GOLPH3	-	ATG	17	ENST00000265070.6	ENST00000265070.6.1
628	chr5:36876983-36877073:+	chr5	36876984	36877073	ENSG00000164190.17	NIPBL	+	ATG	29	ENST00000282516.12	ENST00000282516.12.1
629	chr5:36953627-36953660:+	chr5	36953628	36953660	ENSG00000164190.17	NIPBL	+	ATG	10	ENST00000282516.12	ENST00000282516.12.2
630	chr5:50441337-50441358:-	chr5	50441338	50441358	ENSG00000170571.11	EMB	-	ATG	6	ENST00000303221.9	ENST00000303221.9.1
631	chr5:60928935-60945048:-	chr5	60928936	60945048	ENSG00000049167.14	ERCC8	-	ATG	46	ENST00000265038.9	ENST00000265038.9.1
632	chr5:55853330-55853456:+	chr5	55853331	55853456	ENSG00000164509.13	IL31RA	+	ATG	41	ENST00000396834.5	ENST00000396834.5.1
633	chr5:55982728-55982791:-	chr5	55982729	55982791	ENSG00000134352.19	IL6ST	-	ATG	20	ENST00000381298.6	ENST00000381298.6.1
634	chr5:115544580-115544652:-	chr5	115544581	115544652	ENSG00000145780.7	FEM1C	-	ATG	23	ENST00000274457.4	ENST00000274457.4.1
635	chr5:126918194-127030454:-	chr5	126918195	127030454	ENSG00000173926.5	MARCH3	-	ATG	45	ENST00000308660.5	ENST00000308660.5.1
636	chr5:134618203-134620981:-	chr5	134618204	134620981	ENSG00000152700.13	SAR1B	-	ATG	52	ENST00000507419.5	ENST00000507419.5.1
637	chr5:138338153-138341263:+	chr5	138338154	138341263	ENSG00000120709.10	FAM53C	+	ATG	77	ENST00000239906.9	ENST00000239906.9.1
638	chr5:140042446-140043082:-	chr5	140042447	140043082	ENSG00000158458.19	NRG2	-	ATG	211	ENST00000361474.5	ENST00000361474.5.1
639	chr5:140564479-140564560:+	chr5	140564480	140564560	ENSG00000176087.14	SLC35A4	+	ATG	26	ENST00000323146.7	ENST00000323146.7.2
640	chr5:145937882-145937927:+	chr5	145937883	145937927	ENSG00000156463.17	SH3RF2	+	ATG	14	ENST00000511217.1	ENST00000511217.1.1
641	chr5:149551339-149551360:-	chr5	149551340	149551360	ENSG00000113712.17	CSNK1A1	-	ATG	6	ENST00000261798.9	ENST00000261798.9.1
642	chr5:154039112-154039301:+	chr5	154039113	154039301	ENSG00000037749.11	MFAP3	+	ATG	62	ENST00000322602.9	ENST00000322602.9.1
643	chr5:149960856-149960886:+	chr5	149960857	149960886	ENSG00000155850.7	SLC26A2	+	ATG	9	ENST00000286298.4	ENST00000286298.4.1
644	chr5:176599820-176599844:-	chr5	176599821	176599844	ENSG00000169258.6	GPRIN1	-	ATG	7	ENST00000303991.4	ENST00000303991.4.1
645	chr5:177454875-177455034:+	chr5	177454876	177455034	ENSG00000131188.11	PRR7	+	ATG	52	ENST00000323249.7	ENST00000323249.7.1
646	chr5:168486490-168488623:+	chr5	168486491	168488623	ENSG00000113643.8	RARS	+	ATG	24	ENST00000231572.7	ENST00000231572.7.1
647	chr5:176388757-176388841:+	chr5	176388758	176388841	ENSG00000146066.2	HIGD2A	+	ATG	27	ENST00000274787.2	ENST00000274787.2.1
648	chr5:177303815-177303869:+	chr5	177303816	177303869	ENSG00000169230.9	PRELID1	+	ATG	17	ENST00000303204.8	ENST00000303204.8.1
649	chr5:178153835-178153880:-	chr5	178153836	178153880	ENSG00000145912.8	NHP2	-	ATG	14	ENST00000274606.7	ENST00000274606.7.1
650	chr5:180136411-180209064:-	chr5	180136412	180209064	ENSG00000146090.15	RASGEF1C	-	ATG	148	ENST00000361132.8	ENST00000361132.8.1
651	chr5:180793078-180808685:-	chr5	180793079	180808685	ENSG00000131446.16	MGAT1	-	ATG	18	ENST00000333055.8	ENST00000333055.8.2
652	chr6:7313116-7313197:-	chr6	7313117	7313197	ENSG00000124783.12	SSR1	-	ATG	26	ENST00000474597.5	ENST00000474597.5.1
653	chr6:13814440-13814464:-	chr6	13814441	13814464	ENSG00000050393.11	MCUR1	-	ATG	7	ENST00000379170.8	ENST00000379170.8.1
654	chr6:18155037-18155058:-	chr6	18155038	18155058	ENSG00000137364.4	TPMT	-	ATG	6	ENST00000309983.4	ENST00000309983.4.1
655	chr6:24403000-24405171:+	chr6	24403001	24405171	ENSG00000124532.14	MRS2	+	ATG	79	ENST00000378386.7	ENST00000378386.7.1
656	chr6:21593910-21594057:+	chr6	21593911	21594057	ENSG00000124766.6	SOX4	+	ATG	48	ENST00000244745.3	ENST00000244745.3.1
657	chr6:26383210-26383273:+	chr6	26383211	26383273	ENSG00000124508.16	BTN2A2	+	ATG	20	ENST00000469230.5	ENST00000469230.5.1
658	chr6:27388826-27389051:+	chr6	27388827	27389051	ENSG00000124613.8	ZNF391	+	ATG	74	ENST00000244576.8	ENST00000244576.8.1
659	chr6:33321931-33322914:-	chr6	33321932	33322914	ENSG00000204209.12	DAXX	-	ATG	32	ENST00000374542.9	ENST00000374542.9.1
660	chr6:49463394-49463418:+	chr6	49463395	49463418	ENSG00000031691.6	CENPQ	+	ATG	7	ENST00000335783.3	ENST00000335783.3.1
661	chr6:63635856-63635970:+	chr6	63635857	63635970	ENSG00000118482.11	PHF3	+	ATG	37	ENST00000262043.7	ENST00000262043.7.1
662	chr6:56843406-56843652:-	chr6	56843407	56843652	ENSG00000151914.19	DST	-	ATG	81	ENST00000370788.6	ENST00000370788.6.1
663	chr6:99562927-99568588:-	chr6	99562928	99568588	ENSG00000112237.12	CCNC	-	ATG	37	ENST00000520429.5	ENST00000520429.5.1
664	chr6:95577575-95586428:+	chr6	95577576	95586428	ENSG00000172469.15	MANEA	+	ATG	29	ENST00000358812.8	ENST00000358812.8.1
665	chr6:100881249-100881276:-	chr6	100881250	100881276	ENSG00000112249.13	ASCC3	-	ATG	8	ENST00000369162.6	ENST00000369162.6.1
666	chr6:110958714-110958744:+	chr6	110958715	110958744	ENSG00000155115.6	GTF3C6	+	ATG	9	ENST00000329970.7	ENST00000329970.7.1
667	chr6:133953303-133980088:+	chr6	133953304	133980088	ENSG00000028839.9	TBPL1	+	ATG	42	ENST00000237264.8	ENST00000237264.8.1
668	chr6:161232256-161273963:-	chr6	161232257	161273963	ENSG00000026652.13	AGPAT4	-	ATG	23	ENST00000320285.8	ENST00000320285.8.1
669	chr7:5190278-5190353:+	chr7	5190279	5190353	ENSG00000157954.14	WIPI2	+	ATG	24	ENST00000288828.8	ENST00000288828.8.1
670	chr7:518997-519093:-	chr7	518998	519093	ENSG00000197461.13	PDGFA	-	ATG	31	ENST00000402802.7	ENST00000402802.7.1
671	chr7:838814-838970:+	chr7	838815	838970	ENSG00000164828.17	SUN1	+	ATG	51	ENST00000389574.7	ENST00000389574.7.1
672	chr7:6641944-6642489:+	chr7	6641945	6642489	ENSG00000205903.6	ZNF316	+	ATG	41	ENST00000382252.5	ENST00000382252.5.1
673	chr7:7640851-7641076:-	chr7	7640852	7641076	ENSG00000106399.11	RPA3	-	ATG	74	ENST00000223129.8	ENST00000223129.8.1
674	chr7:2432574-2432604:+	chr7	2432575	2432604	ENSG00000136213.9	CHST12	+	ATG	9	ENST00000258711.7	ENST00000258711.7.1
675	chr7:12687014-12688204:+	chr7	12687015	12688204	ENSG00000122644.12	ARL4A	+	ATG	53	ENST00000396662.5	ENST00000396662.5.1
676	chr7:6578590-6578698:+	chr7	6578591	6578698	ENSG00000136247.14	ZDHHC4	+	ATG	35	ENST00000396706.2	ENST00000396706.2.1
677	chr7:43650550-43729464:-	chr7	43650551	43729464	ENSG00000106603.18	COA1	-	ATG	65	ENST00000310564.10	ENST00000310564.10.1
678	chr7:35801209-35832814:+	chr7	35801210	35832814	ENSG00000122545.19	SEPT7	+	ATG	25	ENST00000399034.7	ENST00000399034.7.1
679	chr7:44122042-44122129:-	chr7	44122043	44122129	ENSG00000106628.10	POLD2	-	ATG	28	ENST00000406581.6	ENST00000406581.6.1
680	chr7:41700505-41703076:-	chr7	41700506	41703076	ENSG00000122641.10	INHBA	-	ATG	27	ENST00000242208.4	ENST00000242208.4.1
681	chr7:66996843-66996897:+	chr7	66996844	66996897	ENSG00000198874.12	TYW1	+	ATG	17	ENST00000359626.9	ENST00000359626.9.1
682	chr7:56051336-56051357:-	chr7	56051337	56051357	ENSG00000146733.13	PSPH	-	ATG	6	ENST00000275605.7	ENST00000275605.7.1
683	chr7:77794287-77798348:-	chr7	77794288	77798348	ENSG00000135211.5	TMEM60	-	ATG	76	ENST00000257663.3	ENST00000257663.3.1
684	chr7:87858731-87876195:-	chr7	87858732	87876195	ENSG00000075303.12	SLC25A40	-	ATG	62	ENST00000341119.9	ENST00000341119.9.1
685	chr7:94004297-94004351:-	chr7	94004298	94004351	ENSG00000105829.11	BET1	-	ATG	17	ENST00000222547.7	ENST00000222547.7.1
686	chr7:98251445-98252250:-	chr7	98251446	98252250	ENSG00000205356.9	TECPR1	-	ATG	75	ENST00000447648.6	ENST00000447648.6.1
687	chr7:100478907-100478958:-	chr7	100478908	100478958	ENSG00000166925.8	TSC22D4	-	ATG	16	ENST00000300181.6	ENST00000300181.6.1
688	chr7:102436242-102436329:+	chr7	102436243	102436329	ENSG00000160991.15	ORAI2	+	ATG	28	ENST00000478730.6	ENST00000478730.6.1
689	chr7:107743911-107744013:+	chr7	107743912	107744013	ENSG00000105879.11	CBLL1	+	ATG	33	ENST00000440859.7	ENST00000440859.7.1
690	chr7:112790312-112790372:-	chr7	112790313	112790372	ENSG00000146802.12	TMEM168	-	ATG	19	ENST00000312814.10	ENST00000312814.10.1
691	chr7:101217411-101217579:-	chr7	101217412	101217579	ENSG00000106397.11	PLOD3	-	ATG	55	ENST00000223127.7	ENST00000223127.7.1
692	chr7:135148236-135164563:+	chr7	135148237	135164563	ENSG00000146859.6	TMEM140	+	ATG	59	ENST00000275767.3	ENST00000275767.3.1
693	chr7:151028466-151033613:+	chr7	151028467	151033613	ENSG00000197150.12	ABCB8	+	ATG	50	ENST00000358849.8	ENST00000358849.8.1
694	chr7:158693469-158701925:-	chr7	158693470	158701925	ENSG00000146918.19	NCAPG2	-	ATG	43	ENST00000356309.7	ENST00000356309.7.1
695	chr8:15540252-15540462:+	chr8	15540253	15540462	ENSG00000104723.20	TUSC3	+	ATG	69	ENST00000382020.8	ENST00000382020.8.1
696	chr8:17245235-17246782:-	chr8	17245236	17246782	ENSG00000198791.11	CNOT7	-	ATG	39	ENST00000361272.8	ENST00000361272.8.1
697	chr8:23084421-23084514:+	chr8	23084422	23084514	ENSG00000284956.1	RP11-875O11.4	+	ATG	30	ENST00000520607.1	ENST00000520607.1.1
698	chr8:26513832-26513859:-	chr8	26513833	26513859	ENSG00000240694.8	PNMA2	-	ATG	8	ENST00000522362.6	ENST00000522362.6.1
699	chr8:23449986-23457608:-	chr8	23449987	23457608	ENSG00000197217.12	ENTPD4	-	ATG	20	ENST00000356206.10	ENST00000356206.10.1
700	chr8:31033890-31058435:+	chr8	31033891	31058435	ENSG00000165392.9	WRN	+	ATG	48	ENST00000298139.5	ENST00000298139.5.1
701	chr8:41598381-41598468:+	chr8	41598382	41598468	ENSG00000158669.11	AGPAT6	+	ATG	28	ENST00000396987.7	ENST00000396987.7.1
702	chr8:42049692-42051975:-	chr8	42049693	42051975	ENSG00000083168.9	KAT6A	-	ATG	29	ENST00000406337.5	ENST00000406337.5.1
703	chr8:54022261-54022399:-	chr8	54022262	54022399	ENSG00000187735.13	TCEA1	-	ATG	45	ENST00000521604.6	ENST00000521604.6.1
704	chr8:52686897-52714133:-	chr8	52686898	52714133	ENSG00000023287.12	RB1CC1	-	ATG	42	ENST00000025008.9	ENST00000025008.9.1
705	chr8:65634009-65634036:-	chr8	65634010	65634036	ENSG00000104442.9	ARMC1	-	ATG	8	ENST00000276569.7	ENST00000276569.7.1
706	chr8:66667619-66667649:+	chr8	66667620	66667649	ENSG00000104205.13	SGK3	+	ATG	9	ENST00000519289.1	ENST00000519289.1.1
707	chr8:66429051-66429081:+	chr8	66429052	66429081	ENSG00000179041.3	RRS1	+	ATG	9	ENST00000320270.3	ENST00000320270.3.1
708	chr8:76984107-76986284:-	chr8	76984108	76986284	ENSG00000164751.14	PEX2	-	ATG	61	ENST00000357039.8	ENST00000357039.8.1
709	chr8:76988307-77000039:-	chr8	76988308	77000039	ENSG00000164751.14	PEX2	-	ATG	26	ENST00000357039.8	ENST00000357039.8.2
710	chr8:80485783-80486319:+	chr8	80485784	80486319	ENSG00000205189.11	ZBTB10	+	ATG	56	ENST00000430430.5	ENST00000430430.5.1
711	chr8:89757906-89757927:+	chr8	89757907	89757927	ENSG00000104312.7	RIPK2	+	ATG	6	ENST00000220751.4	ENST00000220751.4.1
712	chr8:100150622-100151346:+	chr8	100150623	100151346	ENSG00000147669.10	POLR2K	+	ATG	28	ENST00000353107.7	ENST00000353107.7.1
713	chr8:102412666-102412690:-	chr8	102412667	102412690	ENSG00000104517.12	UBR5	-	ATG	7	ENST00000520539.5	ENST00000520539.5.1
714	chr8:115623692-115668610:-	chr8	115623693	115668610	ENSG00000104447.12	TRPS1	-	ATG	43	ENST00000395715.7	ENST00000395715.7.1
715	chr8:119832774-119832825:-	chr8	119832775	119832825	ENSG00000064313.11	TAF2	-	ATG	16	ENST00000378164.6	ENST00000378164.6.1
716	chr8:123274237-123274258:-	chr8	123274238	123274258	ENSG00000259305.6	ZHX1-C8orf76	-	ATG	6	ENST00000622816.2	ENST00000622816.2.1
717	chr8:133571793-133571892:-	chr8	133571794	133571892	ENSG00000008513.14	ST3GAL1	-	ATG	32	ENST00000521180.5	ENST00000521180.5.1
718	chr8:132758897-132760502:-	chr8	132758898	132760502	ENSG00000165071.14	TMEM71	-	ATG	14	ENST00000377901.8	ENST00000377901.8.1
719	chr8:132775425-132775452:+	chr8	132775426	132775452	ENSG00000129292.20	PHF20L1	+	ATG	8	ENST00000395386.6	ENST00000395386.6.1
720	chr8:131904241-131904277:+	chr8	131904242	131904277	ENSG00000132294.14	EFR3A	+	ATG	11	ENST00000254624.9	ENST00000254624.9.1
721	chr8:142449442-142464202:+	chr8	142449443	142464202	ENSG00000181790.11	ADGRB1	+	ATG	294	ENST00000517894.5	ENST00000517894.5.1
722	chr9:12775043-12775085:+	chr9	12775044	12775085	ENSG00000153714.5	LURAP1L	+	ATG	13	ENST00000319264.3	ENST00000319264.3.1
723	chr9:5629184-5629265:+	chr9	5629185	5629265	ENSG00000107036.11	RIC1	+	ATG	26	ENST00000414202.6	ENST00000414202.6.1
724	chr9:33473877-33473898:-	chr9	33473878	33473898	ENSG00000165271.16	NOL6	-	ATG	6	ENST00000353159.6	ENST00000353159.6.1
725	chr9:70413867-70413942:-	chr9	70413868	70413942	ENSG00000119138.4	KLF9	-	ATG	24	ENST00000377126.3	ENST00000377126.3.1
726	chr9:94374736-94374823:+	chr9	94374737	94374823	ENSG00000148110.15	MFSD14B	+	ATG	28	ENST00000375344.7	ENST00000375344.7.1
727	chr9:107283286-107283313:+	chr9	107283287	107283313	ENSG00000119318.12	RAD23B	+	ATG	8	ENST00000358015.7	ENST00000358015.7.1
728	chr9:112380084-112404153:+	chr9	112380085	112404153	ENSG00000119471.14	HSDL2	+	ATG	84	ENST00000398805.7	ENST00000398805.7.1
729	chr9:115118001-115118229:-	chr9	115118002	115118229	ENSG00000041982.15	TNC	-	ATG	75	ENST00000350763.8	ENST00000350763.8.1
730	chr9:127916879-127916984:-	chr9	127916880	127916984	ENSG00000136840.18	ST6GALNAC4	-	ATG	34	ENST00000335791.9	ENST00000335791.9.1
731	chr9:128322626-128322656:+	chr9	128322627	128322656	ENSG00000167113.10	COQ4	+	ATG	9	ENST00000300452.7	ENST00000300452.7.1
732	chr9:130053918-130075645:+	chr9	130053919	130075645	ENSG00000148358.19	GPR107	+	ATG	54	ENST00000347136.10	ENST00000347136.10.1
733	chr9:137045992-137046016:-	chr9	137045993	137046016	ENSG00000107281.9	NPDC1	-	ATG	7	ENST00000371601.4	ENST00000371601.4.1
734	chr9:137086973-137087060:+	chr9	137086974	137087060	ENSG00000177239.14	MAN1B1	+	ATG	28	ENST00000371589.8	ENST00000371589.8.1
735	chr10:3782143-3785114:-	chr10	3782144	3785114	ENSG00000067082.14	KLF6	-	ATG	90	ENST00000497571.5	ENST00000497571.5.1
736	chr10:22321517-22321571:+	chr10	22321518	22321571	ENSG00000168283.13	BMI1	+	ATG	17	ENST00000376663.7	ENST00000376663.7.2
737	chr10:43644788-43646185:-	chr10	43644789	43646185	ENSG00000169740.13	ZNF32	-	ATG	44	ENST00000374433.6	ENST00000374433.6.1
738	chr10:43396536-43396575:-	chr10	43396537	43396575	ENSG00000169813.16	HNRNPF	-	ATG	12	ENST00000356053.7	ENST00000356053.7.1
739	chr10:34815111-34815162:-	chr10	34815112	34815162	ENSG00000148498.15	PARD3	-	ATG	16	ENST00000374790.7	ENST00000374790.7.1
740	chr10:50344158-50344278:-	chr10	50344159	50344278	ENSG00000198964.13	SGMS1	-	ATG	39	ENST00000361781.6	ENST00000361781.6.1
741	chr10:58385432-58386303:+	chr10	58385433	58386303	ENSG00000108064.10	TFAM	+	ATG	99	ENST00000487519.5	ENST00000487519.5.1
742	chr10:63133415-63152162:+	chr10	63133416	63152162	ENSG00000148572.15	NRBF2	+	ATG	60	ENST00000277746.10	ENST00000277746.10.1
743	chr10:72626041-72626068:-	chr10	72626042	72626068	ENSG00000107745.18	MICU1	-	ATG	8	ENST00000361114.9	ENST00000361114.9.1
744	chr10:86521592-86521730:-	chr10	86521593	86521730	ENSG00000062650.18	WAPL	-	ATG	45	ENST00000298767.9	ENST00000298767.9.1
745	chr10:73810897-73811581:-	chr10	73810898	73811581	ENSG00000166507.17	NDST2	-	ATG	37	ENST00000309979.10	ENST00000309979.10.1
746	chr10:91222690-91222720:+	chr10	91222691	91222720	ENSG00000180628.14	PCGF5	+	ATG	9	ENST00000336126.5	ENST00000336126.5.1
747	chr10:102424780-102432576:-	chr10	102424781	102432576	ENSG00000107874.10	CUEDC2	-	ATG	48	ENST00000369937.4	ENST00000369937.4.1
748	chr10:102644315-102644492:+	chr10	102644316	102644492	ENSG00000171206.14	TRIM8	+	ATG	58	ENST00000643721.1	ENST00000643721.1.2
749	chr10:112446762-112446804:-	chr10	112446763	112446804	ENSG00000023041.11	ZDHHC6	-	ATG	13	ENST00000626395.2	ENST00000626395.2.1
750	chr10:117375208-117375319:-	chr10	117375209	117375319	ENSG00000165650.11	PDZD8	-	ATG	36	ENST00000334464.6	ENST00000334464.6.1
751	chr10:123007146-123008786:-	chr10	123007147	123008786	ENSG00000095574.11	IKZF5	-	ATG	40	ENST00000368886.9	ENST00000368886.9.1
752	chr10:126330478-126388200:-	chr10	126330479	126388200	ENSG00000148848.14	ADAM12	-	ATG	57	ENST00000368679.8	ENST00000368679.8.1
753	chr11:534308-535504:-	chr11	534309	535504	ENSG00000174775.16	HRAS	-	ATG	51	ENST00000311189.7	ENST00000311189.7.1
754	chr11:207723-207768:+	chr11	207724	207768	ENSG00000177963.14	RIC8A	+	ATG	14	ENST00000526104.5	ENST00000526104.5.1
755	chr11:803397-804419:-	chr11	803398	804419	ENSG00000177595.17	PIDD1	-	ATG	171	ENST00000347755.9	ENST00000347755.9.1
756	chr11:904826-910780:-	chr11	904827	910780	ENSG00000177830.17	CHID1	-	ATG	12	ENST00000323578.12	ENST00000323578.12.1
757	chr11:9384690-9384747:+	chr11	9384691	9384747	ENSG00000205339.9	IPO7	+	ATG	18	ENST00000379719.7	ENST00000379719.7.1
758	chr11:10294145-10294196:-	chr11	10294146	10294196	ENSG00000133812.15	SBF2	-	ATG	16	ENST00000256190.12	ENST00000256190.12.1
759	chr11:33257633-33257789:+	chr11	33257634	33257789	ENSG00000110422.11	HIPK3	+	ATG	51	ENST00000379016.7	ENST00000379016.7.1
760	chr11:45650651-45650939:-	chr11	45650652	45650939	ENSG00000175264.7	CHST1	-	ATG	95	ENST00000308064.6	ENST00000308064.6.1
761	chr11:45805361-45805604:+	chr11	45805362	45805604	ENSG00000181830.8	SLC35C1	+	ATG	80	ENST00000314134.3	ENST00000314134.3.1
762	chr11:45804475-45804685:+	chr11	45804476	45804685	ENSG00000181830.8	SLC35C1	+	ATG	69	ENST00000314134.3	ENST00000314134.3.2
763	chr11:46084271-46121030:-	chr11	46084272	46121030	ENSG00000135365.15	PHF21A	-	ATG	55	ENST00000323180.10	ENST00000323180.10.1
764	chr11:60924572-60924599:+	chr11	60924573	60924599	ENSG00000006118.14	TMEM132A	+	ATG	8	ENST00000005286.8	ENST00000005286.8.1
765	chr11:63839071-63839188:+	chr11	63839072	63839188	ENSG00000072518.20	MARK2	+	ATG	38	ENST00000361128.9	ENST00000361128.9.1
766	chr11:66342181-66345124:-	chr11	66342182	66345124	ENSG00000174744.13	BRMS1	-	ATG	70	ENST00000359957.7	ENST00000359957.7.1
767	chr11:65615984-65616086:+	chr11	65615985	65616086	ENSG00000197136.4	PCNX3	+	ATG	33	ENST00000355703.3	ENST00000355703.3.1
768	chr11:66257782-66257824:+	chr11	66257783	66257824	ENSG00000174996.11	KLC2	+	ATG	13	ENST00000316924.9	ENST00000316924.9.1
769	chr11:66438782-66438821:-	chr11	66438783	66438821	ENSG00000174547.13	MRPL11	-	ATG	12	ENST00000430466.6	ENST00000430466.6.1
770	chr11:67373623-67373704:-	chr11	67373624	67373704	ENSG00000175505.10	CLCF1	-	ATG	26	ENST00000312438.7	ENST00000312438.7.1
771	chr11:67483052-67483085:+	chr11	67483053	67483085	ENSG00000110711.9	AIP	+	ATG	10	ENST00000279146.7	ENST00000279146.7.1
772	chr11:69294302-69294482:+	chr11	69294303	69294482	ENSG00000172927.7	MYEOV	+	ATG	59	ENST00000308946.3	ENST00000308946.3.1
773	chr11:69294196-69294265:+	chr11	69294197	69294265	ENSG00000172927.7	MYEOV	+	ATG	22	ENST00000308946.3	ENST00000308946.3.2
774	chr11:68460764-68460794:+	chr11	68460765	68460794	ENSG00000110075.14	PPP6R3	+	ATG	9	ENST00000393800.6	ENST00000393800.6.1
775	chr11:72793479-72793587:-	chr11	72793480	72793587	ENSG00000186635.14	ARAP1	-	ATG	35	ENST00000359373.9	ENST00000359373.9.1
776	chr11:74170788-74170860:-	chr11	74170789	74170860	ENSG00000168014.16	C2CD3	-	ATG	23	ENST00000313663.11	ENST00000313663.11.1
777	chr11:78127418-78139628:-	chr11	78127419	78139628	ENSG00000159063.12	ALG8	-	ATG	50	ENST00000299626.9	ENST00000299626.9.1
778	chr11:94129186-94129243:+	chr11	94129187	94129243	ENSG00000110218.8	PANX1	+	ATG	18	ENST00000227638.7	ENST00000227638.7.1
779	chr11:94768424-94768493:+	chr11	94768425	94768493	ENSG00000166025.17	AMOTL1	+	ATG	22	ENST00000317829.12	ENST00000317829.12.1
780	chr11:108009040-108009148:+	chr11	108009041	108009148	ENSG00000166266.13	CUL5	+	ATG	35	ENST00000393094.6	ENST00000393094.6.1
781	chr11:108197326-108222615:-	chr11	108197327	108222615	ENSG00000149308.16	NPAT	-	ATG	69	ENST00000278612.8	ENST00000278612.8.1
782	chr11:112074360-112074453:+	chr11	112074361	112074453	ENSG00000150776.17	C11orf57	+	ATG	30	ENST00000532163.5	ENST00000532163.5.1
783	chr11:114296440-114296464:+	chr11	114296441	114296464	ENSG00000166741.7	NNMT	+	ATG	7	ENST00000535401.5	ENST00000535401.5.1
784	chr11:117179159-117179435:+	chr11	117179160	117179435	ENSG00000149577.15	SIDT2	+	ATG	91	ENST00000324225.8	ENST00000324225.8.1
785	chr11:119334866-119335034:+	chr11	119334867	119335034	ENSG00000173456.4	RNF26	+	ATG	55	ENST00000311413.4	ENST00000311413.4.1
786	chr11:119334533-119334578:+	chr11	119334534	119334578	ENSG00000173456.4	RNF26	+	ATG	14	ENST00000311413.4	ENST00000311413.4.2
787	chr11:117229843-117232337:-	chr11	117229844	117232337	ENSG00000160613.12	PCSK7	-	ATG	147	ENST00000320934.7	ENST00000320934.7.1
788	chr11:117316026-117316098:-	chr11	117316027	117316098	ENSG00000186318.16	BACE1	-	ATG	23	ENST00000313005.10	ENST00000313005.10.1
789	chr11:127000554-127000623:-	chr11	127000555	127000623	ENSG00000149571.11	KIRREL3	-	ATG	22	ENST00000525144.6	ENST00000525144.6.1
790	chr12:6821871-6823525:+	chr12	6821872	6823525	ENSG00000250510.7	GPR162	+	ATG	28	ENST00000311268.7	ENST00000311268.7.1
791	chr12:6341823-6341955:-	chr12	6341824	6341955	ENSG00000067182.7	TNFRSF1A	-	ATG	43	ENST00000162749.6	ENST00000162749.6.1
792	chr12:12611921-12611999:+	chr12	12611922	12611999	ENSG00000111269.2	CREBL2	+	ATG	25	ENST00000228865.2	ENST00000228865.2.1
793	chr12:21773684-21774624:-	chr12	21773685	21774624	ENSG00000121361.3	KCNJ8	-	ATG	26	ENST00000240662.2	ENST00000240662.2.1
794	chr12:15882404-15882425:+	chr12	15882405	15882425	ENSG00000023734.10	STRAP	+	ATG	6	ENST00000419869.6	ENST00000419869.6.1
795	chr12:26938525-26938597:+	chr12	26938526	26938597	ENSG00000111790.13	FGFR1OP2	+	ATG	23	ENST00000229395.7	ENST00000229395.7.1
796	chr12:12662450-12695506:-	chr12	12662451	12695506	ENSG00000183150.7	GPR19	-	ATG	74	ENST00000540796.5	ENST00000540796.5.1
797	chr12:12891053-12891359:+	chr12	12891054	12891359	ENSG00000013588.7	GPRC5A	+	ATG	101	ENST00000014914.5	ENST00000014914.5.1
798	chr12:29371657-29381143:-	chr12	29371658	29381143	ENSG00000087502.17	ERGIC2	-	ATG	13	ENST00000360150.8	ENST00000360150.8.1
799	chr12:48852113-48852137:-	chr12	48852114	48852137	ENSG00000174243.9	DDX23	-	ATG	7	ENST00000308025.7	ENST00000308025.7.1
800	chr12:49566197-49568050:-	chr12	49566198	49568050	ENSG00000187778.13	MCRS1	-	ATG	46	ENST00000343810.8	ENST00000343810.8.1
801	chr12:56042107-56042425:+	chr12	56042108	56042425	ENSG00000197728.10	RPS26	+	ATG	20	ENST00000356464.10	ENST00000356464.10.1
802	chr12:46243229-46243274:-	chr12	46243230	46243274	ENSG00000111371.15	SLC38A1	-	ATG	14	ENST00000398637.9	ENST00000398637.9.1
803	chr12:47079626-47079713:-	chr12	47079627	47079713	ENSG00000139211.6	AMIGO2	-	ATG	28	ENST00000266581.4	ENST00000266581.4.1
804	chr12:57523001-57524039:+	chr12	57523002	57524039	ENSG00000166987.14	MBD6	+	ATG	6	ENST00000355673.7	ENST00000355673.7.1
805	chr12:58920380-58920407:-	chr12	58920381	58920407	ENSG00000139263.11	LRIG3	-	ATG	8	ENST00000320743.7	ENST00000320743.7.1
806	chr12:56153874-56153946:+	chr12	56153875	56153946	ENSG00000196465.10	MYL6B	+	ATG	23	ENST00000553066.5	ENST00000553066.5.1
807	chr12:67648866-67649076:+	chr12	67648867	67649076	ENSG00000127334.10	DYRK2	+	ATG	69	ENST00000344096.3	ENST00000344096.3.1
808	chr12:68746253-68746652:+	chr12	68746254	68746652	ENSG00000175782.9	SLC35E3	+	ATG	132	ENST00000398004.3	ENST00000398004.3.1
809	chr12:69359778-69359814:+	chr12	69359779	69359814	ENSG00000127337.6	YEATS4	+	ATG	11	ENST00000247843.6	ENST00000247843.6.1
810	chr12:71686547-71686595:+	chr12	71686548	71686595	ENSG00000139291.13	TMEM19	+	ATG	15	ENST00000266673.9	ENST00000266673.9.1
811	chr12:84912658-84912793:-	chr12	84912659	84912793	ENSG00000072041.16	SLC6A15	-	ATG	44	ENST00000266682.9	ENST00000266682.9.1
812	chr12:75480744-75480972:+	chr12	75480745	75480972	ENSG00000139278.9	GLIPR1	+	ATG	75	ENST00000266659.7	ENST00000266659.7.1
813	chr12:88141334-88142064:-	chr12	88141335	88142064	ENSG00000198707.14	CEP290	-	ATG	54	ENST00000552810.5	ENST00000552810.5.1
814	chr12:88142403-88142460:+	chr12	88142404	88142460	ENSG00000139324.11	TMTC3	+	ATG	18	ENST00000266712.10	ENST00000266712.10.1
815	chr12:98515560-98515671:+	chr12	98515561	98515671	ENSG00000120802.13	TMPO	+	ATG	36	ENST00000556029.5	ENST00000556029.5.1
816	chr12:107093196-107093238:-	chr12	107093197	107093238	ENSG00000008405.11	CRY1	-	ATG	13	ENST00000008527.9	ENST00000008527.9.1
817	chr12:109477650-109477710:+	chr12	109477651	109477710	ENSG00000151148.13	UBE3B	+	ATG	19	ENST00000434735.6	ENST00000434735.6.1
818	chr12:109093363-109093411:-	chr12	109093364	109093411	ENSG00000189046.10	ALKBH2	-	ATG	15	ENST00000343075.7	ENST00000343075.7.1
819	chr12:110281241-110281448:+	chr12	110281242	110281448	ENSG00000174437.16	ATP2A2	+	ATG	68	ENST00000308664.10	ENST00000308664.10.1
820	chr12:118061110-118061170:-	chr12	118061111	118061170	ENSG00000176871.8	WSB2	-	ATG	19	ENST00000315436.7	ENST00000315436.7.1
821	chr12:113185626-113185857:+	chr12	113185627	113185857	ENSG00000139405.15	RITA1	+	ATG	76	ENST00000548278.1	ENST00000548278.1.1
822	chr12:113226730-113226832:+	chr12	113226731	113226832	ENSG00000186815.12	TPCN1	+	ATG	33	ENST00000335509.10	ENST00000335509.10.1
823	chr12:114683414-114683447:-	chr12	114683415	114683447	ENSG00000135111.15	TBX3	-	ATG	10	ENST00000349155.6	ENST00000349155.6.1
824	chr12:121888771-121888981:+	chr12	121888772	121888981	ENSG00000110801.13	PSMD9	+	ATG	69	ENST00000541212.5	ENST00000541212.5.1
825	chr12:123671137-123671179:+	chr12	123671138	123671179	ENSG00000168778.11	TCTN2	+	ATG	13	ENST00000303372.6	ENST00000303372.6.1
826	chr12:124011641-124011851:+	chr12	124011642	124011851	ENSG00000179195.15	ZNF664	+	ATG	69	ENST00000539644.5	ENST00000539644.5.1
827	chr12:123973929-123973992:+	chr12	123973930	123973992	ENSG00000178882.14	FAM101A	+	ATG	20	ENST00000389727.8	ENST00000389727.8.1
828	chr12:131711104-131711152:+	chr12	131711105	131711152	ENSG00000061936.9	SFSWAP	+	ATG	15	ENST00000261674.8	ENST00000261674.8.1
829	chr12:131929292-131929409:+	chr12	131929293	131929409	ENSG00000177192.13	PUS1	+	ATG	38	ENST00000376649.7	ENST00000376649.7.1
830	chr12:132822200-132822248:-	chr12	132822201	132822248	ENSG00000090615.14	GOLGA3	-	ATG	15	ENST00000456883.6	ENST00000456883.6.1
831	chr13:26254461-26254539:+	chr13	26254462	26254539	ENSG00000132964.11	CDK8	+	ATG	25	ENST00000381527.7	ENST00000381527.7.1
832	chr13:25301686-25301713:+	chr13	25301687	25301713	ENSG00000139496.15	NUP58	+	ATG	8	ENST00000381736.7	ENST00000381736.7.1
833	chr13:27621925-27621961:+	chr13	27621926	27621961	ENSG00000186184.17	POLR1D	+	ATG	11	ENST00000636817.1	ENST00000636817.1.1
834	chr13:32522224-32538637:-	chr13	32522225	32538637	ENSG00000244754.8	N4BP2L2	-	ATG	46	ENST00000504114.5	ENST00000504114.5.1
835	chr13:30307422-30307470:-	chr13	30307423	30307470	ENSG00000102781.13	KATNAL1	-	ATG	15	ENST00000380615.7	ENST00000380615.7.1
836	chr13:48975931-48976012:+	chr13	48975932	48976012	ENSG00000102531.16	FNDC3A	+	ATG	26	ENST00000492622.6	ENST00000492622.6.1
837	chr13:102798845-102798974:-	chr13	102798846	102798974	ENSG00000134901.12	KDELC1	-	ATG	42	ENST00000376004.4	ENST00000376004.4.1
838	chr14:20461461-20461596:-	chr14	20461462	20461596	ENSG00000165782.10	TMEM55B	-	ATG	44	ENST00000250489.8	ENST00000250489.8.1
839	chr14:23299591-23307260:+	chr14	23299592	23307260	ENSG00000129473.9	BCL2L2	+	ATG	29	ENST00000553824.5	ENST00000553824.5.1
840	chr14:22982388-22982466:-	chr14	22982389	22982466	ENSG00000129474.15	AJUBA	-	ATG	25	ENST00000262713.6	ENST00000262713.6.2
841	chr14:22911368-22919182:-	chr14	22911369	22919182	ENSG00000100461.17	RBM23	-	ATG	72	ENST00000359890.7	ENST00000359890.7.1
842	chr14:31026330-31026360:-	chr14	31026331	31026360	ENSG00000196792.11	STRN3	-	ATG	9	ENST00000355683.9	ENST00000355683.9.1
843	chr14:49620883-49620925:+	chr14	49620884	49620925	ENSG00000168282.5	MGAT2	+	ATG	13	ENST00000305386.3	ENST00000305386.3.1
844	chr14:59484525-59486770:+	chr14	59484526	59486770	ENSG00000050130.17	JKAMP	+	ATG	41	ENST00000261247.13	ENST00000261247.13.1
845	chr14:63543325-63543346:-	chr14	63543326	63543346	ENSG00000154001.13	PPP2R5E	-	ATG	6	ENST00000337537.7	ENST00000337537.7.1
846	chr14:60249399-60249474:+	chr14	60249400	60249474	ENSG00000100614.17	PPM1A	+	ATG	24	ENST00000395076.8	ENST00000395076.8.1
847	chr14:57268708-57268816:-	chr14	57268709	57268816	ENSG00000070367.15	EXOC5	-	ATG	35	ENST00000621441.4	ENST00000621441.4.2
848	chr14:69398697-69398787:+	chr14	69398698	69398787	ENSG00000029364.11	SLC39A9	+	ATG	29	ENST00000556605.5	ENST00000556605.5.2
849	chr14:73355752-73366981:-	chr14	73355753	73366981	ENSG00000133961.20	NUMB	-	ATG	32	ENST00000554546.5	ENST00000554546.5.1
850	chr14:73147865-73148072:+	chr14	73147866	73148072	ENSG00000080815.18	PSEN1	+	ATG	38	ENST00000324501.9	ENST00000324501.9.1
851	chr14:67816002-67816576:-	chr14	67816003	67816576	ENSG00000072121.15	ZFYVE26	-	ATG	28	ENST00000347230.8	ENST00000347230.8.1
852	chr14:75657510-75660871:-	chr14	75657511	75660871	ENSG00000133935.6	C14orf1	-	ATG	39	ENST00000256319.6	ENST00000256319.6.1
853	chr14:99481425-99481458:+	chr14	99481426	99481458	ENSG00000090061.17	CCNK	+	ATG	10	ENST00000555049.5	ENST00000555049.5.1
854	chr14:105168070-105168794:-	chr14	105168071	105168794	ENSG00000184916.8	JAG2	-	ATG	158	ENST00000331782.7	ENST00000331782.7.1
855	chr15:34987641-34988197:-	chr15	34987642	34988197	ENSG00000198146.4	ZNF770	-	ATG	37	ENST00000356321.4	ENST00000356321.4.1
856	chr15:51622671-51622719:-	chr15	51622672	51622719	ENSG00000104093.13	DMXL2	-	ATG	15	ENST00000251076.9	ENST00000251076.9.1
857	chr15:52019250-52045844:+	chr15	52019251	52045844	ENSG00000069956.11	MAPK6	+	ATG	46	ENST00000261845.6	ENST00000261845.6.1
858	chr15:50424572-50439025:+	chr15	50424573	50439025	ENSG00000138592.13	USP8	+	ATG	32	ENST00000396444.7	ENST00000396444.7.1
859	chr15:57706727-57708746:+	chr15	57706728	57708746	ENSG00000255529.7	POLR2M	+	ATG	86	ENST00000299638.7	ENST00000299638.7.1
860	chr15:56918222-56918447:-	chr15	56918223	56918447	ENSG00000285253.1	RP11-566D24.2	-	ATG	74	ENST00000559000.6	ENST00000559000.6.1
861	chr15:63042693-63042897:+	chr15	63042694	63042897	ENSG00000140416.20	TPM1	+	ATG	67	ENST00000358278.7	ENST00000358278.7.1
862	chr15:69337390-69337423:+	chr15	69337391	69337423	ENSG00000137819.13	PAQR5	+	ATG	10	ENST00000395407.6	ENST00000395407.6.1
863	chr15:78540430-78541915:+	chr15	78540431	78541915	ENSG00000041357.15	PSMA4	+	ATG	39	ENST00000044462.11	ENST00000044462.11.1
864	chr15:83207716-83207875:-	chr15	83207717	83207875	ENSG00000166503.8	RP11-382A20.3	-	ATG	52	ENST00000299633.6	ENST00000299633.6.1
865	chr15:99731407-99731999:-	chr15	99731408	99731999	ENSG00000183060.15	LYSMD4	-	ATG	98	ENST00000344791.6	ENST00000344791.6.1
866	chr15:90875625-90875691:+	chr15	90875626	90875691	ENSG00000140564.11	FURIN	+	ATG	21	ENST00000268171.7	ENST00000268171.7.1
867	chr16:381842-381941:-	chr16	381843	381941	ENSG00000129925.10	TMEM8A	-	ATG	32	ENST00000431232.6	ENST00000431232.6.1
868	chr16:2155812-2163905:+	chr16	2155813	2163905	ENSG00000131653.12	TRAF7	+	ATG	22	ENST00000326181.10	ENST00000326181.10.1
869	chr16:3024154-3024238:+	chr16	3024155	3024238	ENSG00000131652.13	THOC6	+	ATG	27	ENST00000326266.12	ENST00000326266.12.1
870	chr16:10942339-10942432:-	chr16	10942340	10942432	ENSG00000182108.10	DEXI	-	ATG	30	ENST00000331808.4	ENST00000331808.4.1
871	chr16:3609375-3609543:-	chr16	3609376	3609543	ENSG00000188827.10	SLX4	-	ATG	55	ENST00000294008.3	ENST00000294008.3.1
872	chr16:27257536-27268723:-	chr16	27257537	27268723	ENSG00000169189.16	NSMCE1	-	ATG	20	ENST00000361439.8	ENST00000361439.8.1
873	chr16:24729736-24729790:+	chr16	24729737	24729790	ENSG00000090905.18	TNRC6A	+	ATG	17	ENST00000315183.11	ENST00000315183.11.1
874	chr16:30958721-30958859:+	chr16	30958722	30958859	ENSG00000099381.17	SETD1A	+	ATG	45	ENST00000262519.13	ENST00000262519.13.1
875	chr16:30610210-30610351:-	chr16	30610211	30610351	ENSG00000156853.12	ZNF689	-	ATG	46	ENST00000287461.7	ENST00000287461.7.1
876	chr16:50025273-50025297:+	chr16	50025274	50025297	ENSG00000205423.11	TMEM188	+	ATG	7	ENST00000458059.7	ENST00000458059.7.1
877	chr16:50742783-50742819:+	chr16	50742784	50742819	ENSG00000083799.17	CYLD	+	ATG	11	ENST00000427738.7	ENST00000427738.7.1
878	chr16:50266583-50288087:+	chr16	50266584	50288087	ENSG00000121281.12	ADCY7	+	ATG	59	ENST00000394697.6	ENST00000394697.6.1
879	chr16:56191568-56191607:+	chr16	56191569	56191607	ENSG00000087258.14	GNAO1	+	ATG	12	ENST00000262493.11	ENST00000262493.11.1
880	chr16:67183465-67183561:-	chr16	67183466	67183561	ENSG00000196123.12	KIAA0895L	-	ATG	31	ENST00000290881.11	ENST00000290881.11.1
881	chr16:71789414-71808832:-	chr16	71789415	71808832	ENSG00000166747.12	AP1G1	-	ATG	45	ENST00000299980.8	ENST00000299980.8.1
882	chr16:72093409-72093457:-	chr16	72093410	72093457	ENSG00000140830.8	TXNL4B	-	ATG	15	ENST00000562153.5	ENST00000562153.5.1
883	chr16:77191221-77193648:+	chr16	77191222	77193648	ENSG00000103111.14	MON1B	+	ATG	130	ENST00000248248.7	ENST00000248248.7.1
884	chr16:81007267-81011982:+	chr16	81007268	81011982	ENSG00000166451.13	CENPN	+	ATG	20	ENST00000393335.7	ENST00000393335.7.1
885	chr16:84995942-84995987:-	chr16	84995943	84995987	ENSG00000153786.12	ZDHHC7	-	ATG	14	ENST00000313732.8	ENST00000313732.8.1
886	chr16:84700023-84700050:+	chr16	84700024	84700050	ENSG00000103194.15	USP10	+	ATG	8	ENST00000219473.11	ENST00000219473.11.1
887	chr16:88570413-88570434:+	chr16	88570414	88570434	ENSG00000158545.15	ZC3H18	+	ATG	6	ENST00000301011.9	ENST00000301011.9.1
888	chr16:89954247-89955225:+	chr16	89954248	89955225	ENSG00000140995.16	DEF8	+	ATG	61	ENST00000563594.5	ENST00000563594.5.1
889	chr16:89949465-89954263:+	chr16	89949466	89954263	ENSG00000140995.16	DEF8	+	ATG	22	ENST00000563594.5	ENST00000563594.5.2
890	chr17:3636788-3637243:+	chr17	3636789	3637243	ENSG00000040531.14	CTNS	+	ATG	59	ENST00000046640.7	ENST00000046640.7.1
891	chr17:2511820-2511883:-	chr17	2511821	2511883	ENSG00000127804.12	METTL16	-	ATG	20	ENST00000263092.10	ENST00000263092.10.1
892	chr17:2593954-2638121:+	chr17	2593955	2638121	ENSG00000007168.12	PAFAH1B1	+	ATG	24	ENST00000397195.9	ENST00000397195.9.1
893	chr17:4833500-4833551:+	chr17	4833501	4833551	ENSG00000141503.15	MINK1	+	ATG	16	ENST00000355280.10	ENST00000355280.10.1
894	chr17:4986245-4987629:-	chr17	4986246	4987629	ENSG00000108509.20	CAMTA2	-	ATG	25	ENST00000348066.7	ENST00000348066.7.1
895	chr17:9836430-9842551:+	chr17	9836431	9842551	ENSG00000065325.12	GLP2R	+	ATG	33	ENST00000574745.5	ENST00000574745.5.1
896	chr17:14069533-14069557:+	chr17	14069534	14069557	ENSG00000006695.10	COX10	+	ATG	7	ENST00000261643.7	ENST00000261643.7.1
897	chr17:15945162-15945219:+	chr17	15945163	15945219	ENSG00000170425.3	ADORA2B	+	ATG	18	ENST00000304222.2	ENST00000304222.2.1
898	chr17:17232803-17232866:-	chr17	17232804	17232866	ENSG00000154803.12	FLCN	-	ATG	20	ENST00000285071.8	ENST00000285071.8.1
899	chr17:18039135-18039168:-	chr17	18039136	18039168	ENSG00000171953.15	ATPAF2	-	ATG	10	ENST00000585101.5	ENST00000585101.5.1
900	chr17:19282004-19282073:+	chr17	19282005	19282073	ENSG00000072134.15	EPN2	+	ATG	22	ENST00000314728.9	ENST00000314728.9.1
901	chr17:21284844-21284889:+	chr17	21284845	21284889	ENSG00000034152.18	MAP2K3	+	ATG	14	ENST00000342679.8	ENST00000342679.8.1
902	chr17:21126955-21178266:+	chr17	21126956	21178266	ENSG00000109016.17	DHRS7B	+	ATG	82	ENST00000395511.7	ENST00000395511.7.1
903	chr17:28598968-28598998:-	chr17	28598969	28598998	ENSG00000076382.16	SPAG5	-	ATG	9	ENST00000321765.9	ENST00000321765.9.1
904	chr17:29930000-29930033:-	chr17	29930001	29930033	ENSG00000141298.17	SSH2	-	ATG	10	ENST00000269033.7	ENST00000269033.7.1
905	chr17:40140435-40140516:+	chr17	40140436	40140516	ENSG00000108349.16	CASC3	+	ATG	26	ENST00000264645.11	ENST00000264645.11.1
906	chr17:40256394-40260559:+	chr17	40256395	40260559	ENSG00000171475.13	WIPF2	+	ATG	50	ENST00000323571.8	ENST00000323571.8.1
907	chr17:39451191-39451245:-	chr17	39451192	39451245	ENSG00000125686.11	MED1	-	ATG	17	ENST00000394287.7	ENST00000394287.7.1
908	chr17:44117682-44123592:-	chr17	44117683	44123592	ENSG00000108840.15	HDAC5	-	ATG	36	ENST00000225983.10	ENST00000225983.10.1
909	chr17:48728687-48728720:-	chr17	48728688	48728720	ENSG00000159184.7	HOXB13	-	ATG	10	ENST00000290295.7	ENST00000290295.7.1
910	chr17:44324716-44324764:-	chr17	44324717	44324764	ENSG00000013306.15	SLC25A39	-	ATG	15	ENST00000225308.12	ENST00000225308.12.1
911	chr17:49678054-49678099:-	chr17	49678055	49678099	ENSG00000121067.17	SPOP	-	ATG	14	ENST00000393328.6	ENST00000393328.6.2
912	chr17:59155749-59169748:+	chr17	59155750	59169748	ENSG00000068489.12	PRR11	+	ATG	18	ENST00000262293.8	ENST00000262293.8.1
913	chr17:59964610-59964694:-	chr17	59964611	59964694	ENSG00000189050.15	RNFT1	-	ATG	27	ENST00000305783.12	ENST00000305783.12.1
914	chr17:62065211-62065253:-	chr17	62065212	62065253	ENSG00000108510.9	MED13	-	ATG	13	ENST00000397786.6	ENST00000397786.6.1
915	chr17:64214235-64263190:-	chr17	64214236	64263190	ENSG00000136478.7	TEX2	-	ATG	9	ENST00000258991.7	ENST00000258991.7.1
916	chr17:68248377-68248410:+	chr17	68248378	68248410	ENSG00000196704.11	AMZ2	+	ATG	10	ENST00000359904.7	ENST00000359904.7.2
917	chr17:74987634-74987730:+	chr17	74987635	74987730	ENSG00000109089.7	CDR2L	+	ATG	31	ENST00000337231.5	ENST00000337231.5.1
918	chr17:73286554-73286608:-	chr17	73286555	73286608	ENSG00000179604.9	CDC42EP4	-	ATG	17	ENST00000335793.3	ENST00000335793.3.1
919	chr17:75514060-75514165:-	chr17	75514061	75514165	ENSG00000177303.9	CASKIN2	-	ATG	34	ENST00000321617.7	ENST00000321617.7.1
920	chr17:75979280-75979424:+	chr17	75979281	75979424	ENSG00000257949.6	TEN1	+	ATG	47	ENST00000397640.5	ENST00000397640.5.1
921	chr17:77089165-77093272:+	chr17	77089166	77093272	ENSG00000129657.14	SEC14L1	+	ATG	44	ENST00000392476.6	ENST00000392476.6.2
922	chr17:78997819-78997939:-	chr17	78997820	78997939	ENSG00000171302.16	CANT1	-	ATG	39	ENST00000302345.6	ENST00000302345.6.1
923	chr17:82023611-82023770:+	chr17	82023612	82023770	ENSG00000169683.7	LRRC45	+	ATG	52	ENST00000306688.7	ENST00000306688.7.1
924	chr17:81295141-81295186:-	chr17	81295142	81295186	ENSG00000157637.12	SLC38A10	-	ATG	14	ENST00000374759.7	ENST00000374759.7.1
925	chr18:5895103-5895286:-	chr18	5895104	5895286	ENSG00000206432.4	TMEM200C	-	ATG	60	ENST00000581347.2	ENST00000581347.2.1
926	chr18:2571529-2573062:+	chr18	2571530	2573062	ENSG00000080986.12	NDC80	+	ATG	79	ENST00000261597.8	ENST00000261597.8.1
927	chr18:9708368-9775333:+	chr18	9708369	9775333	ENSG00000168461.12	RAB31	+	ATG	43	ENST00000578921.5	ENST00000578921.5.1
928	chr17:81893566-81893587:+	chr17	81893567	81893587	ENSG00000141552.17	ANAPC11	+	ATG	6	ENST00000571570.5	ENST00000571570.5.1
929	chr18:25322174-25352151:-	chr18	25322175	25352151	ENSG00000198795.10	ZNF521	-	ATG	66	ENST00000361524.7	ENST00000361524.7.1
930	chr18:36067511-36067532:-	chr18	36067512	36067532	ENSG00000141425.17	RPRD1A	-	ATG	6	ENST00000399022.8	ENST00000399022.8.1
931	chr18:26226826-26226922:+	chr18	26226827	26226922	ENSG00000141384.12	TAF4B	+	ATG	31	ENST00000269142.9	ENST00000269142.9.1
932	chr18:32091999-32092050:+	chr18	32092000	32092050	ENSG00000134758.13	RNF138	+	ATG	16	ENST00000261593.7	ENST00000261593.7.1
933	chr18:36129220-36129250:-	chr18	36129221	36129250	ENSG00000141424.12	SLC39A6	-	ATG	9	ENST00000269187.9	ENST00000269187.9.1
934	chr18:49813751-49813823:-	chr18	49813752	49813823	ENSG00000167315.17	ACAA2	-	ATG	23	ENST00000285093.14	ENST00000285093.14.1
935	chr19:1652560-1652590:-	chr19	1652561	1652590	ENSG00000071564.14	TCF3	-	ATG	9	ENST00000453954.6	ENST00000453954.6.1
936	chr19:2737331-2737364:-	chr19	2737332	2737364	ENSG00000267001.1	AC006538.4	-	ATG	10	ENST00000586572.1	ENST00000586572.1.1
937	chr19:2785505-2790550:+	chr19	2785506	2790550	ENSG00000172009.14	THOP1	+	ATG	100	ENST00000307741.10	ENST00000307741.10.1
938	chr19:6372801-6374810:+	chr19	6372802	6374810	ENSG00000125652.7	ALKBH7	+	ATG	173	ENST00000245812.7	ENST00000245812.7.1
939	chr19:7070645-7075008:+	chr19	7070646	7075008	ENSG00000130544.11	ZNF557	+	ATG	6	ENST00000414706.2	ENST00000414706.2.1
940	chr19:9140443-9156000:+	chr19	9140444	9156000	ENSG00000130803.14	ZNF317	+	ATG	74	ENST00000247956.10	ENST00000247956.10.1
941	chr19:15410575-15418975:-	chr19	15410576	15418975	ENSG00000011243.17	AKAP8L	-	ATG	27	ENST00000397410.9	ENST00000397410.9.2
942	chr19:18155480-18155573:+	chr19	18155481	18155573	ENSG00000105647.16	PIK3R2	+	ATG	30	ENST00000222254.12	ENST00000222254.12.1
943	chr19:36115085-36115211:-	chr19	36115086	36115211	ENSG00000105258.8	POLR2I	-	ATG	41	ENST00000221859.8	ENST00000221859.8.2
944	chr19:40285183-40285231:-	chr19	40285184	40285231	ENSG00000105221.16	AKT2	-	ATG	15	ENST00000392038.6	ENST00000392038.6.1
945	chr19:40442048-40444434:-	chr19	40442049	40444434	ENSG00000167565.12	SERTAD3	-	ATG	85	ENST00000322354.3	ENST00000322354.3.1
946	chr19:43935004-43935106:-	chr19	43935005	43935106	ENSG00000124459.11	ZNF45	-	ATG	33	ENST00000269973.9	ENST00000269973.9.1
947	chr19:47221700-47232612:-	chr19	47221701	47232612	ENSG00000105327.17	BBC3	-	ATG	168	ENST00000341983.8	ENST00000341983.8.1
948	chr19:49877203-49877311:-	chr19	49877204	49877311	ENSG00000204673.10	AKT1S1	-	ATG	35	ENST00000391835.1	ENST00000391835.1.1
949	chr19:52025929-52028290:-	chr19	52025930	52028290	ENSG00000142556.18	ZNF614	-	ATG	26	ENST00000356322.10	ENST00000356322.10.1
950	chr19:55339858-55341838:+	chr19	55339859	55341838	ENSG00000133247.13	KMT5C	+	ATG	47	ENST00000255613.7	ENST00000255613.7.1
951	chr19:55247086-55258474:-	chr19	55247087	55258474	ENSG00000105063.18	PPP6R1	-	ATG	20	ENST00000412770.6	ENST00000412770.6.1
952	chr19:57435342-57435417:+	chr19	57435343	57435417	ENSG00000186230.6	ZNF749	+	ATG	24	ENST00000334181.4	ENST00000334181.4.1
953	chr20:448023-462500:-	chr20	448024	462500	ENSG00000125875.13	TBC1D20	-	ATG	71	ENST00000354200.4	ENST00000354200.4.1
954	chr20:408240-408705:+	chr20	408241	408705	ENSG00000125826.20	RBCK1	+	ATG	154	ENST00000356286.9	ENST00000356286.9.1
955	chr20:3149113-3149209:-	chr20	3149114	3149209	ENSG00000215251.3	FASTKD5	-	ATG	31	ENST00000380266.3	ENST00000380266.3.1
956	chr20:6006125-6006206:+	chr20	6006126	6006206	ENSG00000088766.11	CRLS1	+	ATG	26	ENST00000378863.8	ENST00000378863.8.1
957	chr20:10420618-10420750:-	chr20	10420619	10420750	ENSG00000125863.19	MKKS	-	ATG	43	ENST00000347364.7	ENST00000347364.7.2
958	chr20:5950801-5950846:+	chr20	5950802	5950846	ENSG00000125885.13	MCM8	+	ATG	14	ENST00000610722.4	ENST00000610722.4.1
959	chr20:17969074-17969119:+	chr20	17969075	17969119	ENSG00000125871.13	MGME1	+	ATG	14	ENST00000377710.9	ENST00000377710.9.1
960	chr20:21126036-21132099:+	chr20	21126037	21132099	ENSG00000088970.15	KIZ	+	ATG	56	ENST00000620891.4	ENST00000620891.4.1
961	chr20:31722819-31722855:-	chr20	31722820	31722855	ENSG00000171552.12	BCL2L1	-	ATG	11	ENST00000307677.4	ENST00000307677.4.1
962	chr20:32743437-32743488:-	chr20	32743438	32743488	ENSG00000285382.1	RP11-503P21.4	-	ATG	16	ENST00000642484.1	ENST00000642484.1.1
963	chr20:32743437-32743716:-	chr20	32743438	32743716	ENSG00000149600.11	COMMD7	-	ATG	92	ENST00000278980.10	ENST00000278980.10.1
964	chr20:33686269-33686320:-	chr20	33686270	33686320	ENSG00000101412.12	E2F1	-	ATG	16	ENST00000343380.5	ENST00000343380.5.1
965	chr20:35147273-35147315:-	chr20	35147274	35147315	ENSG00000088298.12	EDEM2	-	ATG	13	ENST00000374492.7	ENST00000374492.7.1
966	chr20:35394194-35411979:-	chr20	35394195	35411979	ENSG00000101019.21	UQCC1	-	ATG	13	ENST00000374385.9	ENST00000374385.9.1
967	chr20:34369398-34369449:+	chr20	34369399	34369449	ENSG00000078747.14	ITCH	+	ATG	16	ENST00000374864.8	ENST00000374864.8.1
968	chr20:43591012-43591033:+	chr20	43591013	43591033	ENSG00000101052.12	IFT52	+	ATG	6	ENST00000373030.7	ENST00000373030.7.1
969	chr20:46613525-46670106:-	chr20	46613526	46670106	ENSG00000158296.13	SLC13A3	-	ATG	87	ENST00000472148.5	ENST00000472148.5.1
970	chr20:45934707-45937464:+	chr20	45934708	45937464	ENSG00000100982.11	PCIF1	+	ATG	47	ENST00000372409.7	ENST00000372409.7.1
971	chr20:45881238-45882563:+	chr20	45881239	45882563	ENSG00000168612.4	ZSWIM1	+	ATG	17	ENST00000372523.1	ENST00000372523.1.1
972	chr20:46358686-46358725:-	chr20	46358687	46358725	ENSG00000080189.14	SLC35C2	-	ATG	12	ENST00000543605.5	ENST00000543605.5.1
973	chr20:58309738-58309789:+	chr20	58309739	58309789	ENSG00000124209.3	RAB22A	+	ATG	16	ENST00000244040.3	ENST00000244040.3.1
974	chr20:58651292-58651319:+	chr20	58651293	58651319	ENSG00000124222.22	STX16	+	ATG	8	ENST00000355957.9	ENST00000355957.9.1
975	chr20:57391531-57391564:+	chr20	57391532	57391564	ENSG00000132819.16	RBM38	+	ATG	10	ENST00000356208.9	ENST00000356208.9.1
976	chr20:63215581-63215899:-	chr20	63215582	63215899	ENSG00000149658.17	YTHDF1	-	ATG	17	ENST00000370339.7	ENST00000370339.7.1
977	chr20:63659282-63659357:+	chr20	63659283	63659357	ENSG00000258366.8	RTEL1	+	ATG	24	ENST00000370018.7	ENST00000370018.7.1
978	chr21:32279017-32279047:-	chr21	32279018	32279047	ENSG00000159055.3	MIS18A	-	ATG	9	ENST00000290130.3	ENST00000290130.3.1
979	chr21:42879413-42879524:-	chr21	42879414	42879524	ENSG00000160193.11	WDR4	-	ATG	36	ENST00000330317.6	ENST00000330317.6.1
980	chr22:20131925-20139484:+	chr22	20131926	20139484	ENSG00000099904.15	ZDHHC8	+	ATG	84	ENST00000334554.11	ENST00000334554.11.1
981	chr22:20394284-20394377:+	chr22	20394285	20394377	ENSG00000185252.18	ZNF74	+	ATG	30	ENST00000400451.6	ENST00000400451.6.1
982	chr22:26482167-26482227:-	chr22	26482168	26482227	ENSG00000100099.20	HPS4	-	ATG	19	ENST00000398145.6	ENST00000398145.6.2
983	chr22:26481911-26481983:-	chr22	26481912	26481983	ENSG00000100099.20	HPS4	-	ATG	23	ENST00000398145.6	ENST00000398145.6.3
984	chr22:26510617-26512432:-	chr22	26510618	26512432	ENSG00000100109.16	TFIP11	-	ATG	66	ENST00000407690.5	ENST00000407690.5.1
985	chr22:29267808-29267898:-	chr22	29267809	29267898	ENSG00000100263.13	RHBDD3	-	ATG	29	ENST00000216085.11	ENST00000216085.11.1
986	chr22:29603617-29603653:+	chr22	29603618	29603653	ENSG00000186575.17	NF2	+	ATG	11	ENST00000338641.8	ENST00000338641.8.2
987	chr22:35257507-35257555:+	chr22	35257508	35257555	ENSG00000100281.13	HMGXB4	+	ATG	15	ENST00000216106.5	ENST00000216106.5.1
988	chr22:37188190-37188235:-	chr22	37188191	37188235	ENSG00000133466.13	C1QTNF6	-	ATG	14	ENST00000337843.6	ENST00000337843.6.1
989	chr22:38872195-38872216:-	chr22	38872196	38872216	ENSG00000183741.11	CBX6	-	ATG	6	ENST00000407418.7	ENST00000407418.7.1
990	chr22:39152544-39152622:-	chr22	39152545	39152622	ENSG00000100307.12	CBX7	-	ATG	25	ENST00000216133.9	ENST00000216133.9.1
991	chr22:41621243-41621992:+	chr22	41621244	41621992	ENSG00000196419.12	XRCC6	+	ATG	34	ENST00000360079.7	ENST00000360079.7.1
992	chr22:41833193-41833232:+	chr22	41833194	41833232	ENSG00000198911.11	SREBF2	+	ATG	12	ENST00000361204.8	ENST00000361204.8.1
993	chr22:36233235-36239518:-	chr22	36233236	36239518	ENSG00000128335.13	APOL2	-	ATG	45	ENST00000249066.10	ENST00000249066.10.1
994	chr22:42695562-42695631:-	chr22	42695563	42695631	ENSG00000128274.16	A4GALT	-	ATG	22	ENST00000642412.1	ENST00000642412.1.1
995	chr22:46762773-46792558:+	chr22	46762774	46792558	ENSG00000054611.13	TBC1D22A	+	ATG	37	ENST00000337137.8	ENST00000337137.8.1
996	chr22:49883336-49883576:+	chr22	49883337	49883576	ENSG00000100426.6	ZBED4	+	ATG	79	ENST00000216268.5	ENST00000216268.5.2
997	chrX:3713350-3713575:-	chrX	3713351	3713575	ENSG00000183943.5	PRKX	-	ATG	74	ENST00000262848.5	ENST00000262848.5.1
998	chrX:14873458-14873705:+	chrX	14873459	14873705	ENSG00000130150.11	MOSPD2	+	ATG	31	ENST00000380492.7	ENST00000380492.7.1
999	chrX:13703849-13703876:+	chrX	13703850	13703876	ENSG00000123595.7	RAB9A	+	ATG	8	ENST00000464506.1	ENST00000464506.1.1
1000	chrX:47561218-47561248:+	chrX	47561219	47561248	ENSG00000078061.12	ARAF	+	ATG	9	ENST00000377045.8	ENST00000377045.8.1
1001	chrX:49922670-49923461:+	chrX	49922671	49923461	ENSG00000171365.16	CLCN5	+	ATG	58	ENST00000376088.7	ENST00000376088.7.1
1002	chrX:53225154-53225196:-	chrX	53225155	53225196	ENSG00000126012.11	KDM5C	-	ATG	13	ENST00000375401.7	ENST00000375401.7.1
1003	chrX:81121670-81201833:-	chrX	81121671	81201833	ENSG00000198157.10	HMGN5	-	ATG	32	ENST00000358130.6	ENST00000358130.6.1
1004	chrX:77786133-77786268:-	chrX	77786134	77786268	ENSG00000085224.21	ATRX	-	ATG	44	ENST00000373344.9	ENST00000373344.9.1
1005	chrX:53654124-53680074:-	chrX	53654125	53680074	ENSG00000086758.15	HUWE1	-	ATG	10	ENST00000342160.7	ENST00000342160.7.1
1006	chrX:103376402-103377041:+	chrX	103376403	103377041	ENSG00000166681.13	BEX3	+	ATG	74	ENST00000361298.8	ENST00000361298.8.1
1007	chrX:134373342-134377581:+	chrX	134373343	134377581	ENSG00000156531.16	PHF6	+	ATG	44	ENST00000370803.7	ENST00000370803.7.1
1008	chrX:154488984-154489035:-	chrX	154488985	154489035	ENSG00000126903.15	SLC10A3	-	ATG	16	ENST00000393587.4	ENST00000393587.4.1
1009	chrX:153971136-153971172:-	chrX	153971137	153971172	ENSG00000172534.13	HCFC1	-	ATG	11	ENST00000310441.11	ENST00000310441.11.1
1010	chrX:55182561-55182804:-	chrX	55182562	55182804	ENSG00000256045.2	MTRNR2L10	-	ATG	80	ENST00000545075.2	ENST00000545075.2.1
1011	chr2:65227758-65239880:+	chr2	65227759	65239880	ENSG00000138071.13	ACTR2	+	ATG	75	ENST00000260641.9	ENST00000260641.9.1
1012	chr2:74472443-74472706:-	chr2	74472444	74472706	ENSG00000204822.6	MRPL53	-	ATG	54	ENST00000258105.7	ENST00000258105.7.1
1013	chr2:161179642-161179744:+	chr2	161179643	161179744	ENSG00000136560.13	TANK	+	ATG	33	ENST00000259075.6	ENST00000259075.6.1
1014	chr3:5122293-5170519:+	chr3	5122294	5170519	ENSG00000134108.12	ARL8B	+	ATG	103	ENST00000256496.7	ENST00000256496.7.1
1015	chr3:17508512-17623884:-	chr3	17508513	17623884	ENSG00000131374.14	TBC1D5	-	ATG	42	ENST00000253692.11	ENST00000253692.11.1
1016	chr3:51385134-51386283:+	chr3	51385135	51386283	ENSG00000145050.15	MANF	+	ATG	125	ENST00000528157.5	ENST00000528157.5.1
1017	chr3:57757213-57757402:+	chr3	57757214	57757402	ENSG00000163681.14	SLMAP	+	ATG	62	ENST00000295951.7	ENST00000295951.7.1
1018	chr3:157159970-157160468:-	chr3	157159971	157160468	ENSG00000163660.11	CCNL1	-	ATG	165	ENST00000461804.5	ENST00000461804.5.1
1019	chr3:172112475-172133490:+	chr3	172112476	172133490	ENSG00000075420.12	FNDC3B	+	ATG	44	ENST00000336824.8	ENST00000336824.8.1
1020	chr4:39062588-39062669:+	chr4	39062589	39062669	ENSG00000109790.16	KLHL5	+	ATG	26	ENST00000261425.7	ENST00000261425.7.1
1021	chr4:65670116-65670155:-	chr4	65670117	65670155	ENSG00000145242.13	EPHA5	-	ATG	12	ENST00000273854.7	ENST00000273854.7.1
1022	chr5:54307913-54310479:-	chr5	54307914	54310479	ENSG00000185305.10	ARL15	-	ATG	26	ENST00000502271.5	ENST00000502271.5.1
1023	chr5:83065013-83077351:-	chr5	83065014	83077351	ENSG00000174695.9	TMEM167A	-	ATG	44	ENST00000502346.1	ENST00000502346.1.1
1024	chr5:134758801-134758837:+	chr5	134758802	134758837	ENSG00000145833.15	DDX46	+	ATG	11	ENST00000452510.6	ENST00000452510.6.1
1025	chr6:3118706-3127257:+	chr6	3118707	3127257	ENSG00000137274.12	BPHL	+	ATG	86	ENST00000380379.9	ENST00000380379.9.1
1026	chr6:2766139-2768712:+	chr6	2766140	2768712	ENSG00000124535.15	WRNIP1	+	ATG	108	ENST00000380769.8	ENST00000380769.8.1
1027	chr6:99416368-99416407:-	chr6	99416369	99416407	ENSG00000132424.14	PNISR	-	ATG	12	ENST00000369239.9	ENST00000369239.9.1
1028	chr9:70413817-70413976:-	chr9	70413818	70413976	ENSG00000119138.4	KLF9	-	ATG	52	ENST00000377126.3	ENST00000377126.3.2
1029	chr10:15102227-15103378:+	chr10	15102228	15103378	ENSG00000152464.14	RPP38	+	ATG	60	ENST00000378201.6	ENST00000378201.6.1
1030	chr10:110918149-110919128:-	chr10	110918150	110919128	ENSG00000214413.7	BBIP1	-	ATG	23	ENST00000448814.5	ENST00000448814.5.1
1031	chr11:65014116-65018639:+	chr11	65014117	65018639	ENSG00000213465.7	ARL2	+	ATG	111	ENST00000246747.8	ENST00000246747.8.1
1032	chr11:68263717-68268210:-	chr11	68263718	68268210	ENSG00000171067.10	C11orf24	-	ATG	101	ENST00000304271.10	ENST00000304271.10.2
1033	chr11:108009116-108009362:+	chr11	108009117	108009362	ENSG00000166266.13	CUL5	+	ATG	81	ENST00000393094.6	ENST00000393094.6.2
1034	chr14:64535967-64541454:+	chr14	64535968	64541454	ENSG00000126803.9	HSPA2	+	ATG	205	ENST00000394709.2	ENST00000394709.2.1
1035	chr16:58599464-58599506:-	chr16	58599465	58599506	ENSG00000125107.17	CNOT1	-	ATG	13	ENST00000317147.9	ENST00000317147.9.1
1036	chr16:70346831-70355524:+	chr16	70346832	70355524	ENSG00000168872.16	DDX19A	+	ATG	101	ENST00000302243.11	ENST00000302243.11.1
1037	chr16:84101691-84101805:-	chr16	84101692	84101805	ENSG00000140943.16	MBTPS1	-	ATG	37	ENST00000343411.7	ENST00000343411.7.3
1038	chr16:85799435-85799585:-	chr16	85799436	85799585	ENSG00000131148.8	EMC8	-	ATG	49	ENST00000435200.2	ENST00000435200.2.1
1039	chr17:28950181-28950964:-	chr17	28950182	28950964	ENSG00000109118.13	PHF12	-	ATG	44	ENST00000332830.8	ENST00000332830.8.1
1040	chr17:36532669-36533991:-	chr17	36532670	36533991	ENSG00000278259.4	MYO19	-	ATG	16	ENST00000614623.4	ENST00000614623.4.1
1041	chr18:74496281-74500007:+	chr18	74496282	74500007	ENSG00000133313.14	CNDP2	+	ATG	91	ENST00000324262.8	ENST00000324262.8.1
1042	chr20:2923258-2964894:+	chr20	2923259	2964894	ENSG00000132670.20	PTPRA	+	ATG	60	ENST00000380393.7	ENST00000380393.7.1
1043	chr20:47502006-47583223:+	chr20	47502007	47583223	ENSG00000124151.18	NCOA3	+	ATG	17	ENST00000372004.7	ENST00000372004.7.1
1044	chr20:63706706-63707113:-	chr20	63706707	63707113	ENSG00000101246.19	ARFRP1	-	ATG	48	ENST00000612256.4	ENST00000612256.4.1
1045	chrX:30859630-30859675:-	chrX	30859631	30859675	ENSG00000157625.15	TAB3	-	ATG	14	ENST00000378933.5	ENST00000378933.5.1
1046	chr1:16608532-16608640:-	chr1	16608533	16608640	ENSG00000219481.10	NBPF1	-	ATG	35	ENST00000430580.6	ENST00000430580.6.1
1047	chr1:23791022-23793721:+	chr1	23791023	23793721	ENSG00000011009.10	LYPLA2	+	ATG	148	ENST00000374514.7	ENST00000374514.7.1
1048	chr1:28516838-28529885:+	chr1	28516839	28529885	ENSG00000180198.15	RCC1	+	ATG	18	ENST00000373833.10	ENST00000373833.10.1
1049	chr1:93346149-93346221:+	chr1	93346150	93346221	ENSG00000117505.12	DR1	+	ATG	23	ENST00000370272.8	ENST00000370272.8.1
1050	chr2:38880599-38880650:+	chr2	38880600	38880650	ENSG00000188010.13	MORN2	+	ATG	16	ENST00000409077.2	ENST00000409077.2.1
1051	chr2:45009255-45009375:-	chr2	45009256	45009375	ENSG00000170577.7	SIX2	-	ATG	39	ENST00000303077.6	ENST00000303077.6.1
1052	chr3:127822643-127822781:-	chr3	127822644	127822781	ENSG00000074416.13	MGLL	-	ATG	45	ENST00000434178.6	ENST00000434178.6.1
1053	chr4:127880936-127881026:+	chr4	127880937	127881026	ENSG00000142731.10	PLK4	+	ATG	29	ENST00000270861.9	ENST00000270861.9.1
1054	chr5:6633524-6651928:+	chr5	6633525	6651928	ENSG00000145545.11	SRD5A1	+	ATG	143	ENST00000274192.6	ENST00000274192.6.1
1055	chr5:79619623-79619707:+	chr5	79619624	79619707	ENSG00000164329.13	PAPD4	+	ATG	27	ENST00000423041.6	ENST00000423041.6.1
1056	chr5:177351504-177351834:-	chr5	177351505	177351834	ENSG00000169223.14	LMAN2	-	ATG	109	ENST00000303127.11	ENST00000303127.11.1
1057	chr6:20152683-20212241:-	chr6	20152684	20212241	ENSG00000172197.10	MBOAT1	-	ATG	63	ENST00000324607.7	ENST00000324607.7.1
1058	chr6:99521074-99526107:+	chr6	99521075	99526107	ENSG00000228439.5	TSTD3	+	ATG	38	ENST00000452647.2	ENST00000452647.2.1
1059	chr6:159761942-159763024:+	chr6	159761943	159763024	ENSG00000120437.8	ACAT2	+	ATG	101	ENST00000367048.4	ENST00000367048.4.1
1060	chr7:7572438-7572495:+	chr7	7572439	7572495	ENSG00000164654.15	MIOS	+	ATG	18	ENST00000340080.8	ENST00000340080.8.1
1061	chr7:16646159-16665451:+	chr7	16646160	16665451	ENSG00000136261.14	BZW2	+	ATG	47	ENST00000258761.7	ENST00000258761.7.1
1062	chr7:23299309-23300860:+	chr7	23299310	23300860	ENSG00000156928.4	MALSU1	+	ATG	106	ENST00000466681.1	ENST00000466681.1.1
1063	chr7:43650675-43650711:-	chr7	43650676	43650711	ENSG00000106603.18	COA1	-	ATG	11	ENST00000310564.10	ENST00000310564.10.2
1064	chr8:38231803-38233065:+	chr8	38231804	38233065	ENSG00000085788.13	DDHD2	+	ATG	44	ENST00000397166.6	ENST00000397166.6.1
1065	chr8:65669880-65669952:+	chr8	65669881	65669952	ENSG00000066855.15	MTFR1	+	ATG	23	ENST00000262146.8	ENST00000262146.8.1
1066	chr8:142785326-142786553:-	chr8	142785327	142786553	ENSG00000167656.4	LY6D	-	ATG	105	ENST00000301263.4	ENST00000301263.4.1
1067	chr9:26947041-26947266:-	chr9	26947042	26947266	ENSG00000137055.14	PLAA	-	ATG	74	ENST00000397292.7	ENST00000397292.7.1
1068	chr9:128340762-128345319:+	chr9	128340763	128345319	ENSG00000167114.12	SLC27A4	+	ATG	135	ENST00000300456.4	ENST00000300456.4.1
1069	chr14:69879511-69952144:+	chr14	69879512	69952144	ENSG00000198732.10	SMOC1	+	ATG	90	ENST00000381280.4	ENST00000381280.4.1
1070	chr15:65133410-65133833:-	chr15	65133411	65133833	ENSG00000090470.14	PDCD7	-	ATG	140	ENST00000204549.8	ENST00000204549.8.1
1071	chr16:19521821-19522115:-	chr16	19521822	19522115	ENSG00000006007.11	GDE1	-	ATG	97	ENST00000353258.7	ENST00000353258.7.1
1072	chr19:10543919-10543991:+	chr19	10543920	10543991	ENSG00000130734.9	ATG4D	+	ATG	23	ENST00000309469.8	ENST00000309469.8.1
1073	chr19:17555646-17559337:+	chr19	17555647	17559337	ENSG00000130309.10	GLT25D1	+	ATG	117	ENST00000252599.8	ENST00000252599.8.1
1074	chrX:49062041-49062528:+	chrX	49062042	49062528	ENSG00000147144.12	CCDC120	+	ATG	75	ENST00000597275.5	ENST00000597275.5.1
1075	chr1:37794128-37794152:+	chr1	37794129	37794152	ENSG00000185090.14	MANEAL	+	ATG	7	ENST00000373045.10	ENST00000373045.10.1
1076	chr1:46594205-46594274:-	chr1	46594206	46594274	ENSG00000079277.19	MKNK1	-	ATG	22	ENST00000371945.8	ENST00000371945.8.1
1077	chr1:51878615-51878642:-	chr1	51878616	51878642	ENSG00000078618.21	NRDC	-	ATG	8	ENST00000354831.11	ENST00000354831.11.1
1078	chr1:113929846-113929921:+	chr1	113929847	113929921	ENSG00000163349.21	HIPK1	+	ATG	24	ENST00000369558.5	ENST00000369558.5.1
1079	chr1:153615900-153615933:-	chr1	153615901	153615933	ENSG00000189334.8	S100A14	-	ATG	10	ENST00000368702.5	ENST00000368702.5.1
1080	chr2:20447274-20447358:+	chr2	20447275	20447358	ENSG00000143878.9	RHOB	+	ATG	27	ENST00000272233.5	ENST00000272233.5.2
1081	chr2:234995350-235034919:+	chr2	234995351	235034919	ENSG00000130147.15	SH3BP4	+	ATG	24	ENST00000392011.6	ENST00000392011.6.1
1082	chr2:237590512-237590752:-	chr2	237590513	237590752	ENSG00000124839.12	RAB17	-	ATG	79	ENST00000264601.7	ENST00000264601.7.1
1083	chr3:129440161-129440359:+	chr3	129440162	129440359	ENSG00000163913.11	IFT122	+	ATG	65	ENST00000347300.6	ENST00000347300.6.1
1084	chr3:195442944-195442989:-	chr3	195442945	195442989	ENSG00000114331.13	ACAP2	-	ATG	14	ENST00000326793.10	ENST00000326793.10.1
1085	chr4:169620664-169620691:+	chr4	169620665	169620691	ENSG00000109572.13	CLCN3	+	ATG	8	ENST00000513761.5	ENST00000513761.5.2
1086	chr5:177600187-177604486:+	chr5	177600188	177604486	ENSG00000027847.13	B4GALT7	+	ATG	126	ENST00000029410.9	ENST00000029410.9.1
1087	chr8:97869105-97888201:+	chr8	97869106	97888201	ENSG00000132561.13	MATN2	+	ATG	102	ENST00000521689.5	ENST00000521689.5.1
1088	chr8:98944688-98944790:+	chr8	98944689	98944790	ENSG00000164920.9	OSR2	+	ATG	33	ENST00000297565.8	ENST00000297565.8.1
1089	chr8:124474803-124474857:+	chr8	124474804	124474857	ENSG00000170881.4	RNF139	+	ATG	17	ENST00000303545.3	ENST00000303545.3.1
1090	chr10:100912983-100913136:+	chr10	100912984	100913136	ENSG00000119906.11	SLF2	+	ATG	50	ENST00000238961.8	ENST00000238961.8.1
1091	chr10:103917593-103917656:-	chr10	103917594	103917656	ENSG00000107960.10	OBFC1	-	ATG	20	ENST00000224950.7	ENST00000224950.7.1
1092	chr11:44095656-44095806:+	chr11	44095657	44095806	ENSG00000151348.13	EXT2	+	ATG	49	ENST00000533608.5	ENST00000533608.5.1
1093	chr11:65111948-65111972:+	chr11	65111949	65111972	ENSG00000149809.14	TM7SF2	+	ATG	7	ENST00000279263.11	ENST00000279263.11.1
1094	chr11:86800567-86800609:+	chr11	86800568	86800609	ENSG00000150687.11	PRSS23	+	ATG	13	ENST00000533902.2	ENST00000533902.2.1
1095	chr11:125592875-125592905:+	chr11	125592876	125592905	ENSG00000134910.12	STT3A	+	ATG	9	ENST00000392708.8	ENST00000392708.8.1
1096	chr12:45216088-45216205:+	chr12	45216089	45216205	ENSG00000177119.15	ANO6	+	ATG	38	ENST00000425752.6	ENST00000425752.6.1
1097	chr12:116277127-116277166:-	chr12	116277128	116277166	ENSG00000123066.7	MED13L	-	ATG	12	ENST00000281928.7	ENST00000281928.7.1
1098	chr14:67674556-67674580:-	chr14	67674557	67674580	ENSG00000100568.10	VTI1B	-	ATG	7	ENST00000554659.5	ENST00000554659.5.1
1099	chr14:67241166-67269705:+	chr14	67241167	67269705	ENSG00000072415.8	MPP5	+	ATG	123	ENST00000261681.8	ENST00000261681.8.1
1100	chr15:64093700-64093784:-	chr15	64093701	64093784	ENSG00000166797.10	FAM96A	-	ATG	27	ENST00000300030.7	ENST00000300030.7.1
1101	chr15:63157429-63157486:-	chr15	63157430	63157486	ENSG00000185088.13	RPS27L	-	ATG	18	ENST00000330964.9	ENST00000330964.9.1
1102	chr15:70097510-70097540:-	chr15	70097511	70097540	ENSG00000140332.15	TLE3	-	ATG	9	ENST00000558939.5	ENST00000558939.5.2
1103	chr15:98649282-98649369:+	chr15	98649283	98649369	ENSG00000140443.13	IGF1R	+	ATG	28	ENST00000268035.10	ENST00000268035.10.1
1104	chrX:47467502-47467697:-	chrX	47467503	47467697	ENSG00000147124.12	ZNF41	-	ATG	64	ENST00000377065.8	ENST00000377065.8.1
1105	chrX:154536173-154547060:-	chrX	154536174	154547060	ENSG00000160211.16	G6PD	-	ATG	134	ENST00000621232.4	ENST00000621232.4.1
1106	chr6:106293079-106316208:-	chr6	106293080	106316208	ENSG00000057663.15	ATG5	-	ATG	44	ENST00000636437.1	ENST00000636437.1.1
1107	chr6:159688172-159730908:-	chr6	159688173	159730908	ENSG00000285441.1	RP1-56L9.7	-	ATG	98	ENST00000546087.5	ENST00000546087.5.1
1108	chr8:43102587-43122120:+	chr8	43102588	43122120	ENSG00000185900.9	POMK	+	ATG	109	ENST00000331373.9	ENST00000331373.9.2
1109	chr8:98045042-98045789:-	chr8	98045043	98045789	ENSG00000156482.10	RPL30	-	ATG	57	ENST00000521726.1	ENST00000521726.1.1
1110	chr20:5119692-5126538:-	chr20	5119693	5126538	ENSG00000132646.10	PCNA	-	ATG	86	ENST00000379160.3	ENST00000379160.3.1
1111	chr1:8871929-8878803:-	chr1	8871930	8878803	ENSG00000074800.14	ENO1	-	ATG	124	ENST00000646539.1	ENST00000646539.1.1
1112	chr3:9793006-9800190:+	chr3	9793007	9800190	ENSG00000241553.12	ARPC4	+	ATG	80	ENST00000397261.7	ENST00000397261.7.1
1113	chr12:122871041-122896189:-	chr12	122871042	122896189	ENSG00000139722.6	VPS37B	-	ATG	85	ENST00000267202.6	ENST00000267202.6.1
1114	chr15:72217470-72230987:-	chr15	72217471	72230987	ENSG00000067225.17	PKM	-	ATG	94	ENST00000319622.10	ENST00000319622.10.1
1115	chr17:15945055-15945469:+	chr17	15945056	15945469	ENSG00000170425.3	ADORA2B	+	ATG	137	ENST00000304222.2	ENST00000304222.2.2
1116	chr20:35284408-35284845:-	chr20	35284409	35284845	ENSG00000242372.7	EIF6	-	ATG	67	ENST00000374450.7	ENST00000374450.7.1
1117	chr20:4800983-4801049:-	chr20	4800984	4801049	ENSG00000101265.15	RASSF2	-	ATG	21	ENST00000379400.7	ENST00000379400.7.1
1118	chr1:43970019-43970097:+	chr1	43970020	43970097	ENSG00000132768.13	DPH2	+	ATG	25	ENST00000255108.7	ENST00000255108.7.1
1119	chr3:150762814-150762868:-	chr3	150762815	150762868	ENSG00000181788.3	SIAH2	-	ATG	17	ENST00000312960.3	ENST00000312960.3.1
1120	chr15:65607321-65611108:-	chr15	65607322	65611108	ENSG00000138614.14	INTS14	-	ATG	43	ENST00000313182.6	ENST00000313182.6.1
1121	chr20:5109386-5113033:-	chr20	5109387	5113033	ENSG00000089063.14	TMEM230	-	ATG	43	ENST00000612323.4	ENST00000612323.4.1
1122	chr1:11982068-11982092:+	chr1	11982069	11982092	ENSG00000116688.16	MFN2	+	ATG	7	ENST00000235329.9	ENST00000235329.9.1
1123	chr1:26111863-26111914:+	chr1	26111864	26111914	ENSG00000175087.9	PDIK1L	+	ATG	16	ENST00000374271.8	ENST00000374271.8.1
1124	chr1:35557212-35557269:-	chr1	35557213	35557269	ENSG00000142687.17	KIAA0319L	-	ATG	18	ENST00000325722.7	ENST00000325722.7.1
1125	chr1:45691012-45691060:+	chr1	45691013	45691060	ENSG00000159596.6	TMEM69	+	ATG	15	ENST00000372025.4	ENST00000372025.4.1
1126	chr1:52142373-52216464:+	chr1	52142374	52216464	ENSG00000157077.14	ZFYVE9	+	ATG	41	ENST00000357206.6	ENST00000357206.6.1
1127	chr1:112619385-112619493:+	chr1	112619386	112619493	ENSG00000116489.12	CAPZA1	+	ATG	35	ENST00000263168.3	ENST00000263168.3.1
1128	chr1:113905495-113905570:+	chr1	113905496	113905570	ENSG00000118655.4	DCLRE1B	+	ATG	24	ENST00000369563.3	ENST00000369563.3.2
1129	chr1:113759066-113759126:-	chr1	113759067	113759126	ENSG00000116793.15	PHTF1	-	ATG	19	ENST00000369604.5	ENST00000369604.5.1
1130	chr1:179082103-179082193:+	chr1	179082104	179082193	ENSG00000186283.13	TOR3A	+	ATG	29	ENST00000352445.10	ENST00000352445.10.1
1131	chr1:203802093-203802192:+	chr1	203802094	203802192	ENSG00000058673.16	ZC3H11A	+	ATG	32	ENST00000639812.1	ENST00000639812.1.2
1132	chr1:211829298-211830631:-	chr1	211829299	211830631	ENSG00000123684.12	LPGAT1	-	ATG	27	ENST00000366997.8	ENST00000366997.8.1
1133	chr1:222712693-222712714:+	chr1	222712694	222712714	ENSG00000162819.11	BROX	+	ATG	6	ENST00000340934.9	ENST00000340934.9.1
1134	chr1:241848809-241848917:+	chr1	241848810	241848917	ENSG00000174371.16	EXO1	+	ATG	35	ENST00000366548.7	ENST00000366548.7.2
1135	chr2:53765501-53859947:-	chr2	53765502	53859947	ENSG00000270898.5	GPR75-ASB3	-	ATG	67	ENST00000406625.5	ENST00000406625.5.1
1136	chr2:65431995-65432040:-	chr2	65431996	65432040	ENSG00000198369.9	SPRED2	-	ATG	14	ENST00000356388.8	ENST00000356388.8.1
1137	chr2:111121152-111123765:+	chr2	111121153	111123765	ENSG00000153094.22	BCL2L11	+	ATG	22	ENST00000393256.7	ENST00000393256.7.1
1138	chr2:166307064-166311764:-	chr2	166307065	166311764	ENSG00000169432.15	SCN9A	-	ATG	91	ENST00000409672.5	ENST00000409672.5.1
1139	chr2:175136458-175151079:-	chr2	175136459	175151079	ENSG00000115966.16	ATF2	-	ATG	15	ENST00000345739.9	ENST00000345739.9.2
1140	chr2:199955476-199955536:-	chr2	199955477	199955536	ENSG00000162971.10	TYW5	-	ATG	19	ENST00000354611.8	ENST00000354611.8.1
1141	chr2:201045506-201045566:-	chr2	201045507	201045566	ENSG00000155744.9	FAM126B	-	ATG	19	ENST00000418596.7	ENST00000418596.7.1
1142	chr2:207769431-207769509:-	chr2	207769432	207769509	ENSG00000163251.3	FZD5	-	ATG	25	ENST00000295417.3	ENST00000295417.3.1
1143	chr2:218562685-218562772:-	chr2	218562686	218562772	ENSG00000135913.10	USP37	-	ATG	28	ENST00000258399.7	ENST00000258399.7.1
1144	chr2:232550240-232550285:-	chr2	232550241	232550285	ENSG00000221944.6	TIGD1	-	ATG	14	ENST00000408957.4	ENST00000408957.4.1
1145	chr3:23945457-23945511:+	chr3	23945458	23945511	ENSG00000174738.12	NR1D2	+	ATG	17	ENST00000312521.8	ENST00000312521.8.1
1146	chr3:49510435-49510459:+	chr3	49510436	49510459	ENSG00000173402.11	DAG1	+	ATG	7	ENST00000308775.6	ENST00000308775.6.1
1147	chr3:52700483-52704854:-	chr3	52700484	52704854	ENSG00000016864.18	GLT8D1	-	ATG	47	ENST00000478968.6	ENST00000478968.6.1
1148	chr3:66500784-66500820:-	chr3	66500785	66500820	ENSG00000144749.13	LRIG1	-	ATG	11	ENST00000383703.3	ENST00000383703.3.1
1149	chr3:152299842-152299980:+	chr3	152299843	152299980	ENSG00000152601.17	MBNL1	+	ATG	45	ENST00000355460.6	ENST00000355460.6.3
1150	chr4:5711349-5719288:+	chr4	5711350	5719288	ENSG00000072840.12	EVC	+	ATG	81	ENST00000264956.10	ENST00000264956.10.1
1151	chr4:17804650-17804689:-	chr4	17804651	17804689	ENSG00000163257.10	DCAF16	-	ATG	12	ENST00000382247.5	ENST00000382247.5.1
1152	chr4:77066297-77075543:-	chr4	77066298	77075543	ENSG00000118816.9	CCNI	-	ATG	59	ENST00000237654.8	ENST00000237654.8.1
1153	chr4:105708817-105717738:+	chr4	105708818	105717738	ENSG00000138780.14	GSTCD	+	ATG	114	ENST00000394730.7	ENST00000394730.7.1
1154	chr4:147617704-147617833:+	chr4	147617705	147617833	ENSG00000164168.7	TMEM184C	+	ATG	42	ENST00000508208.5	ENST00000508208.5.2
1155	chr5:69094205-69094247:+	chr5	69094206	69094247	ENSG00000145740.18	SLC30A5	+	ATG	13	ENST00000396591.7	ENST00000396591.7.1
1156	chr5:150001014-150004883:+	chr5	150001015	150004883	ENSG00000113716.12	HMGXB3	+	ATG	65	ENST00000503427.5	ENST00000503427.5.1
1157	chr6:53041265-53041385:-	chr6	53041266	53041385	ENSG00000112144.15	ICK	-	ATG	39	ENST00000350082.9	ENST00000350082.9.1
1158	chr6:78867553-78867742:+	chr6	78867554	78867742	ENSG00000146243.13	IRAK1BP1	+	ATG	62	ENST00000369940.6	ENST00000369940.6.1
1159	chr6:97282439-97282520:-	chr6	97282440	97282520	ENSG00000146263.11	MMS22L	-	ATG	26	ENST00000275053.8	ENST00000275053.8.1
1160	chr6:95586431-95586506:+	chr6	95586432	95586506	ENSG00000172469.15	MANEA	+	ATG	24	ENST00000358812.8	ENST00000358812.8.2
1161	chr6:156777382-156777520:+	chr6	156777383	156777520	ENSG00000049618.22	ARID1B	+	ATG	45	ENST00000346085.9	ENST00000346085.9.1
1162	chr7:1158246-1160132:-	chr7	1158247	1160132	ENSG00000178381.11	ZFAND2A	-	ATG	59	ENST00000401903.5	ENST00000401903.5.1
1163	chr7:75486175-75486202:-	chr7	75486176	75486202	ENSG00000272391.5	POM121C	-	ATG	8	ENST00000615331.4	ENST00000615331.4.1
1164	chr7:101252018-101252120:-	chr7	101252019	101252120	ENSG00000214253.8	FIS1	-	ATG	33	ENST00000474120.5	ENST00000474120.5.1
1165	chr7:150368902-150388451:+	chr7	150368903	150388451	ENSG00000284041.1	RP11-511P7.7	+	ATG	22	ENST00000478789.5	ENST00000478789.5.1
1166	chr8:38176276-38176606:-	chr8	38176277	38176606	ENSG00000175324.9	LSM1	-	ATG	109	ENST00000311351.8	ENST00000311351.8.1
1167	chr8:33453499-33461642:-	chr8	33453500	33461642	ENSG00000172728.15	FUT10	-	ATG	93	ENST00000327671.9	ENST00000327671.9.1
1168	chr8:73294935-73294959:+	chr8	73294936	73294959	ENSG00000121039.9	RDH10	+	ATG	7	ENST00000240285.9	ENST00000240285.9.1
1169	chr8:144519619-144519967:+	chr8	144519620	144519967	ENSG00000160959.7	LRRC14	+	ATG	115	ENST00000292524.5	ENST00000292524.5.1
1170	chr10:38010753-38012345:+	chr10	38010754	38012345	ENSG00000189180.15	ZNF33A	+	ATG	25	ENST00000469037.2	ENST00000469037.2.1
1171	chr10:32056173-32056200:-	chr10	32056174	32056200	ENSG00000170759.10	KIF5B	-	ATG	8	ENST00000302418.4	ENST00000302418.4.1
1172	chr10:91222719-91222824:+	chr10	91222720	91222824	ENSG00000180628.14	PCGF5	+	ATG	34	ENST00000336126.5	ENST00000336126.5.2
1173	chr10:112445458-112445542:-	chr10	112445459	112445542	ENSG00000023041.11	ZDHHC6	-	ATG	27	ENST00000626395.2	ENST00000626395.2.2
1174	chr10:124046318-124046444:-	chr10	124046319	124046444	ENSG00000182022.17	CHST15	-	ATG	41	ENST00000346248.7	ENST00000346248.7.1
1175	chr11:207788-207950:+	chr11	207789	207950	ENSG00000177963.14	RIC8A	+	ATG	53	ENST00000526104.5	ENST00000526104.5.2
1176	chr11:68263865-68268196:-	chr11	68263866	68268196	ENSG00000171067.10	C11orf24	-	ATG	47	ENST00000304271.10	ENST00000304271.10.3
1177	chr12:46268860-46268905:-	chr12	46268861	46268905	ENSG00000111371.15	SLC38A1	-	ATG	14	ENST00000398637.9	ENST00000398637.9.2
1178	chr12:56041949-56041973:+	chr12	56041950	56041973	ENSG00000197728.10	RPS26	+	ATG	7	ENST00000356464.10	ENST00000356464.10.2
1179	chr12:56216458-56216524:-	chr12	56216459	56216524	ENSG00000181852.17	RNF41	-	ATG	21	ENST00000345093.8	ENST00000345093.8.2
1180	chr12:57755187-57755280:+	chr12	57755188	57755280	ENSG00000139266.5	MARCH9	+	ATG	30	ENST00000266643.5	ENST00000266643.5.1
1181	chr12:68808246-68808291:+	chr12	68808247	68808291	ENSG00000135679.23	MDM2	+	ATG	14	ENST00000258149.9	ENST00000258149.9.1
1182	chr12:89656025-89656094:-	chr12	89656026	89656094	ENSG00000070961.15	ATP2B1	-	ATG	22	ENST00000428670.7	ENST00000428670.7.1
1183	chr12:100142604-100142811:-	chr12	100142605	100142811	ENSG00000111647.12	UHRF1BP1L	-	ATG	68	ENST00000279907.11	ENST00000279907.11.1
1184	chr13:29850116-29850173:-	chr13	29850117	29850173	ENSG00000122042.9	UBL3	-	ATG	18	ENST00000380680.4	ENST00000380680.4.2
1185	chr13:39601049-39601355:-	chr13	39601050	39601355	ENSG00000183722.7	LHFP	-	ATG	101	ENST00000379589.3	ENST00000379589.3.1
1186	chr13:41311220-41311412:+	chr13	41311221	41311412	ENSG00000172766.18	NAA16	+	ATG	63	ENST00000379406.7	ENST00000379406.7.1
1187	chr13:106535381-106535444:-	chr13	106535382	106535444	ENSG00000125266.7	EFNB2	-	ATG	20	ENST00000646441.1	ENST00000646441.1.1
1188	chr13:102799221-102799323:+	chr13	102799222	102799323	ENSG00000134897.13	BIVM	+	ATG	33	ENST00000257336.5	ENST00000257336.5.1
1189	chr14:99971814-99971874:+	chr14	99971815	99971874	ENSG00000196405.12	EVL	+	ATG	19	ENST00000402714.6	ENST00000402714.6.1
1190	chr15:66703084-66703195:+	chr15	66703085	66703195	ENSG00000137834.14	SMAD6	+	ATG	36	ENST00000288840.9	ENST00000288840.9.1
1191	chr15:78123719-78131261:-	chr15	78123720	78131261	ENSG00000136425.13	CIB2	-	ATG	38	ENST00000258930.7	ENST00000258930.7.1
1192	chr15:82875400-82952621:-	chr15	82875401	82952621	ENSG00000103942.12	HOMER2	-	ATG	83	ENST00000304231.12	ENST00000304231.12.1
1193	chr15:89247637-89247730:+	chr15	89247638	89247730	ENSG00000140525.17	FANCI	+	ATG	30	ENST00000300027.12	ENST00000300027.12.1
1194	chr16:11668537-11676010:+	chr16	11668538	11676010	ENSG00000184602.5	SNN	+	ATG	12	ENST00000329565.5	ENST00000329565.5.1
1195	chr16:25111843-25111894:+	chr16	25111844	25111894	ENSG00000205629.11	LCMT1	+	ATG	16	ENST00000399069.7	ENST00000399069.7.1
1196	chr16:29995981-29996272:+	chr16	29995982	29996272	ENSG00000169592.14	INO80E	+	ATG	96	ENST00000563197.5	ENST00000563197.5.1
1197	chr16:30762115-30762223:+	chr16	30762116	30762223	ENSG00000103549.21	RNF40	+	ATG	35	ENST00000324685.10	ENST00000324685.10.1
1198	chr16:56451289-56451310:-	chr16	56451290	56451310	ENSG00000167005.13	NUDT21	-	ATG	6	ENST00000300291.9	ENST00000300291.9.1
1199	chr16:58599326-58599386:-	chr16	58599327	58599386	ENSG00000125107.17	CNOT1	-	ATG	19	ENST00000317147.9	ENST00000317147.9.2
1200	chr16:68266597-68274779:+	chr16	68266598	68274779	ENSG00000103064.13	SLC7A6	+	ATG	70	ENST00000219343.10	ENST00000219343.10.1
1201	chr16:89418324-89490305:-	chr16	89418325	89490305	ENSG00000167522.15	ANKRD11	-	ATG	34	ENST00000301030.9	ENST00000301030.9.1
1202	chr17:14301317-14301407:+	chr17	14301318	14301407	ENSG00000125430.8	HS3ST3B1	+	ATG	29	ENST00000360954.2	ENST00000360954.2.1
1203	chr17:19867473-19867560:-	chr17	19867474	19867560	ENSG00000083290.19	ULK2	-	ATG	28	ENST00000361658.6	ENST00000361658.6.1
1204	chr17:35735123-35740485:+	chr17	35735124	35740485	ENSG00000270885.1	RASL10B	+	ATG	117	ENST00000603017.1	ENST00000603017.1.1
1205	chr17:76729705-76729792:+	chr17	76729706	76729792	ENSG00000181038.13	METTL23	+	ATG	28	ENST00000588783.5	ENST00000588783.5.1
1206	chr18:10454632-10454866:+	chr18	10454633	10454866	ENSG00000154856.12	APCDD1	+	ATG	77	ENST00000355285.9	ENST00000355285.9.1
1207	chr18:50663190-50663238:+	chr18	50663191	50663238	ENSG00000141639.11	MAPK4	+	ATG	15	ENST00000400384.6	ENST00000400384.6.1
1208	chr18:74148596-74148623:+	chr18	74148597	74148623	ENSG00000075336.11	TIMM21	+	ATG	8	ENST00000169551.10	ENST00000169551.10.1
1209	chr19:35937227-35937341:+	chr19	35937228	35937341	ENSG00000126243.8	LRFN3	+	ATG	37	ENST00000588831.5	ENST00000588831.5.1
1210	chr19:38081398-38081497:+	chr19	38081399	38081497	ENSG00000105738.10	SIPA1L3	+	ATG	32	ENST00000222345.10	ENST00000222345.10.1
1211	chr19:38893847-38899521:-	chr19	38893848	38899521	ENSG00000068903.19	SIRT2	-	ATG	11	ENST00000392081.6	ENST00000392081.6.1
1212	chr19:39831874-39834198:-	chr19	39831875	39834198	ENSG00000105204.13	DYRK1B	-	ATG	89	ENST00000323039.9	ENST00000323039.9.1
1213	chr19:42325917-42325989:+	chr19	42325918	42325989	ENSG00000105429.12	MEGF8	+	ATG	23	ENST00000334370.8	ENST00000334370.8.1
1214	chr19:47352776-47352818:+	chr19	47352777	47352818	ENSG00000134815.18	DHX34	+	ATG	13	ENST00000328771.8	ENST00000328771.8.1
1215	chr19:49877134-49877185:-	chr19	49877135	49877185	ENSG00000204673.10	AKT1S1	-	ATG	16	ENST00000391835.1	ENST00000391835.1.2
1216	chr20:3854587-3854638:+	chr20	3854588	3854638	ENSG00000088888.17	MAVS	+	ATG	16	ENST00000428216.3	ENST00000428216.3.1
1217	chr20:6768277-6768589:+	chr20	6768278	6768589	ENSG00000125845.6	BMP2	+	ATG	103	ENST00000378827.4	ENST00000378827.4.1
1218	chr20:6768191-6768278:+	chr20	6768192	6768278	ENSG00000125845.6	BMP2	+	ATG	28	ENST00000378827.4	ENST00000378827.4.2
1219	chr21:31731896-31731953:-	chr21	31731897	31731953	ENSG00000156304.14	SCAF4	-	ATG	18	ENST00000399804.5	ENST00000399804.5.1
1220	chr21:46636502-46636913:+	chr21	46636503	46636913	ENSG00000160310.17	PRMT2	+	ATG	20	ENST00000355680.7	ENST00000355680.7.2
1221	chr22:18078019-18078348:+	chr22	18078020	18078348	ENSG00000215193.12	PEX26	+	ATG	26	ENST00000329627.11	ENST00000329627.11.1
1222	chr22:24548046-24555016:-	chr22	24548047	24555016	ENSG00000138867.16	GUCD1	-	ATG	59	ENST00000435822.5	ENST00000435822.5.1
1223	chr22:24035476-24035515:+	chr22	24035477	24035515	ENSG00000099991.17	CABIN1	+	ATG	12	ENST00000263119.9	ENST00000263119.9.1
1224	chr22:37608501-37608630:+	chr22	37608502	37608630	ENSG00000100083.18	GGA1	+	ATG	42	ENST00000343632.8	ENST00000343632.8.1
1225	chr22:38700353-38700404:-	chr22	38700354	38700404	ENSG00000100221.10	JOSD1	-	ATG	16	ENST00000216039.9	ENST00000216039.9.2
1226	chr22:41544136-41544262:-	chr22	41544137	41544262	ENSG00000100413.16	POLR3H	-	ATG	41	ENST00000355209.8	ENST00000355209.8.1
1227	chr22:49913704-49913842:-	chr22	49913705	49913842	ENSG00000182858.13	ALG12	-	ATG	45	ENST00000330817.10	ENST00000330817.10.1
1228	chr22:50343432-50372117:+	chr22	50343433	50372117	ENSG00000100239.15	PPP6R2	+	ATG	71	ENST00000359139.7	ENST00000359139.7.1
1229	chrX:24054923-24054947:+	chrX	24054924	24054947	ENSG00000130741.10	EIF2S3	+	ATG	7	ENST00000253039.8	ENST00000253039.8.1
1230	chr1:11980455-11980482:+	chr1	11980456	11980482	ENSG00000116688.16	MFN2	+	ATG	8	ENST00000235329.9	ENST00000235329.9.2
1231	chr1:26952288-26952387:-	chr1	26952289	26952387	ENSG00000175707.8	KDF1	-	ATG	32	ENST00000320567.5	ENST00000320567.5.1
1232	chr1:28516732-28516795:+	chr1	28516733	28516795	ENSG00000180198.15	RCC1	+	ATG	20	ENST00000373833.10	ENST00000373833.10.2
1233	chr1:41186178-41186250:-	chr1	41186179	41186250	ENSG00000010803.16	SCMH1	-	ATG	23	ENST00000372596.5	ENST00000372596.5.2
1234	chr1:43707549-43736241:+	chr1	43707550	43736241	ENSG00000126091.20	ST3GAL3	+	ATG	50	ENST00000347631.7	ENST00000347631.7.1
1235	chr1:50969470-50969611:+	chr1	50969471	50969611	ENSG00000123080.10	CDKN2C	+	ATG	46	ENST00000262662.5	ENST00000262662.5.2
1236	chr1:50969823-50970365:+	chr1	50969824	50970365	ENSG00000123080.10	CDKN2C	+	ATG	27	ENST00000262662.5	ENST00000262662.5.3
1237	chr1:50968728-50968788:+	chr1	50968729	50968788	ENSG00000123080.10	CDKN2C	+	ATG	19	ENST00000262662.5	ENST00000262662.5.4
1238	chr1:45660611-45660635:-	chr1	45660612	45660635	ENSG00000159592.10	GPBP1L1	-	ATG	7	ENST00000290795.7	ENST00000290795.7.1
1239	chr1:68497006-68497027:-	chr1	68497007	68497027	ENSG00000024526.16	DEPDC1	-	ATG	6	ENST00000370966.9	ENST00000370966.9.1
1240	chr1:74733207-74733324:+	chr1	74733208	74733324	ENSG00000162623.15	TYW3	+	ATG	38	ENST00000370867.7	ENST00000370867.7.2
1241	chr1:75724531-75724627:+	chr1	75724532	75724627	ENSG00000117054.13	ACADM	+	ATG	31	ENST00000370841.8	ENST00000370841.8.1
1242	chr1:70354487-70354559:-	chr1	70354488	70354559	ENSG00000118454.12	ANKRD13C	-	ATG	23	ENST00000370944.8	ENST00000370944.8.1
1243	chr1:77641540-77641579:-	chr1	77641541	77641579	ENSG00000036549.12	ZZZ3	-	ATG	12	ENST00000370798.5	ENST00000370798.5.1
1244	chr1:93079495-93079522:+	chr1	93079496	93079522	ENSG00000143033.17	MTF2	+	ATG	8	ENST00000370298.8	ENST00000370298.8.2
1245	chr1:100894689-100894770:-	chr1	100894690	100894770	ENSG00000162694.13	EXTL2	-	ATG	26	ENST00000370114.7	ENST00000370114.7.2
1246	chr1:100895425-100895641:-	chr1	100895426	100895641	ENSG00000162694.13	EXTL2	-	ATG	71	ENST00000370114.7	ENST00000370114.7.3
1247	chr1:111137545-111137566:-	chr1	111137546	111137566	ENSG00000156171.14	DRAM2	-	ATG	6	ENST00000286692.8	ENST00000286692.8.2
1248	chr1:112619719-112619776:+	chr1	112619720	112619776	ENSG00000116489.12	CAPZA1	+	ATG	18	ENST00000263168.3	ENST00000263168.3.2
1249	chr1:113073279-113073339:+	chr1	113073280	113073339	ENSG00000198799.11	LRIG2	+	ATG	19	ENST00000361127.5	ENST00000361127.5.1
1250	chr1:117367849-117367906:+	chr1	117367850	117367906	ENSG00000198162.12	MAN1A2	+	ATG	18	ENST00000356554.7	ENST00000356554.7.1
1251	chr1:117920401-117929466:-	chr1	117920402	117929466	ENSG00000196505.10	GDAP2	-	ATG	13	ENST00000369443.9	ENST00000369443.9.2
1252	chr1:116666531-116666588:-	chr1	116666532	116666588	ENSG00000143061.17	IGSF3	-	ATG	18	ENST00000369486.7	ENST00000369486.7.2
1253	chr1:119711901-119711946:+	chr1	119711902	119711946	ENSG00000092621.12	PHGDH	+	ATG	14	ENST00000641597.1	ENST00000641597.1.1
1254	chr1:147611589-147611796:+	chr1	147611590	147611796	ENSG00000116128.10	BCL9	+	ATG	68	ENST00000234739.7	ENST00000234739.7.1
1255	chr1:151006571-151006697:-	chr1	151006572	151006697	ENSG00000143409.15	FAM63A	-	ATG	41	ENST00000361936.9	ENST00000361936.9.1
1256	chr1:151055968-151059495:-	chr1	151055969	151059495	ENSG00000197622.12	CDC42SE1	-	ATG	13	ENST00000439374.6	ENST00000439374.6.1
1257	chr1:151165572-151165629:-	chr1	151165573	151165629	ENSG00000163155.11	LYSMD1	-	ATG	18	ENST00000368908.9	ENST00000368908.9.1
1258	chr1:154602508-154602583:-	chr1	154602509	154602583	ENSG00000160710.15	ADAR	-	ATG	24	ENST00000368471.7	ENST00000368471.7.1
1259	chr1:156601410-156601467:-	chr1	156601411	156601467	ENSG00000160818.16	GPATCH4	-	ATG	18	ENST00000368232.8	ENST00000368232.8.1
1260	chr1:156727994-156728312:-	chr1	156727995	156728312	ENSG00000143319.16	ISG20L2	-	ATG	105	ENST00000313146.10	ENST00000313146.10.1
1261	chr1:156727802-156727976:-	chr1	156727803	156727976	ENSG00000143319.16	ISG20L2	-	ATG	57	ENST00000313146.10	ENST00000313146.10.2
1262	chr1:156727692-156727749:-	chr1	156727693	156727749	ENSG00000143319.16	ISG20L2	-	ATG	18	ENST00000313146.10	ENST00000313146.10.3
1263	chr1:160031792-160031888:-	chr1	160031793	160031888	ENSG00000143315.7	PIGM	-	ATG	31	ENST00000368090.4	ENST00000368090.4.1
1264	chr1:161176439-161176505:-	chr1	161176440	161176505	ENSG00000158850.14	B4GALT3	-	ATG	21	ENST00000367998.5	ENST00000367998.5.2
1265	chr1:169368247-169368280:+	chr1	169368248	169368280	ENSG00000117475.13	BLZF1	+	ATG	10	ENST00000329281.6	ENST00000329281.6.1
1266	chr1:178776686-178776710:+	chr1	178776687	178776710	ENSG00000116191.17	RALGPS2	+	ATG	7	ENST00000367635.7	ENST00000367635.7.2
1267	chr1:174999604-174999652:+	chr1	174999605	174999652	ENSG00000116161.17	CACYBP	+	ATG	15	ENST00000613570.4	ENST00000613570.4.1
1268	chr1:184477466-184477505:+	chr1	184477467	184477505	ENSG00000116667.12	C1orf21	+	ATG	12	ENST00000235307.6	ENST00000235307.6.2
1269	chr1:203802307-203802565:+	chr1	203802308	203802565	ENSG00000058673.16	ZC3H11A	+	ATG	85	ENST00000639812.1	ENST00000639812.1.3
1270	chr1:206612388-206612442:-	chr1	206612389	206612442	ENSG00000143486.15	EIF2D	-	ATG	17	ENST00000367114.7	ENST00000367114.7.1
1271	chr1:213015723-213015804:-	chr1	213015724	213015804	ENSG00000174606.13	ANGEL2	-	ATG	26	ENST00000360506.6	ENST00000360506.6.1
1272	chr1:222712779-222712845:+	chr1	222712780	222712845	ENSG00000162819.11	BROX	+	ATG	21	ENST00000340934.9	ENST00000340934.9.2
1273	chr1:220046413-220046560:-	chr1	220046414	220046560	ENSG00000136628.17	EPRS	-	ATG	48	ENST00000366923.7	ENST00000366923.7.1
1274	chr1:226871352-226871379:+	chr1	226871353	226871379	ENSG00000143801.16	PSEN2	+	ATG	8	ENST00000366783.7	ENST00000366783.7.1
1275	chr1:227317542-227317677:-	chr1	227317543	227317677	ENSG00000143776.18	CDC42BPA	-	ATG	44	ENST00000366769.7	ENST00000366769.7.2
1276	chr1:227317866-227317920:-	chr1	227317867	227317920	ENSG00000143776.18	CDC42BPA	-	ATG	17	ENST00000366769.7	ENST00000366769.7.3
1277	chr1:241848754-241848802:+	chr1	241848755	241848802	ENSG00000174371.16	EXO1	+	ATG	15	ENST00000366548.7	ENST00000366548.7.3
1278	chr2:3377738-3377789:-	chr2	3377739	3377789	ENSG00000032389.12	TSSC1	-	ATG	16	ENST00000382125.8	ENST00000382125.8.1
1279	chr2:6940973-6941051:+	chr2	6940974	6941051	ENSG00000151692.14	RNF144A	+	ATG	25	ENST00000320892.10	ENST00000320892.10.1
1280	chr2:27052939-27053002:+	chr2	27052940	27053002	ENSG00000084693.15	AGBL5	+	ATG	20	ENST00000360131.4	ENST00000360131.4.1
1281	chr2:32063803-32063971:+	chr2	32063804	32063971	ENSG00000021574.12	SPAST	+	ATG	55	ENST00000315285.8	ENST00000315285.8.1
1282	chr2:37317028-37317127:-	chr2	37317029	37317127	ENSG00000115825.9	PRKD3	-	ATG	32	ENST00000379066.5	ENST00000379066.5.2
1283	chr2:38665975-38666032:+	chr2	38665976	38666032	ENSG00000143891.16	GALM	+	ATG	18	ENST00000272252.9	ENST00000272252.9.1
1284	chr2:65056477-65069398:+	chr2	65056478	65069398	ENSG00000011523.13	CEP68	+	ATG	16	ENST00000377990.6	ENST00000377990.6.1
1285	chr2:69829838-69829871:+	chr2	69829839	69829871	ENSG00000087338.4	GMCL1	+	ATG	10	ENST00000282570.3	ENST00000282570.3.1
1286	chr2:69829738-69829798:+	chr2	69829739	69829798	ENSG00000087338.4	GMCL1	+	ATG	19	ENST00000282570.3	ENST00000282570.3.2
1287	chr2:71130467-71130572:+	chr2	71130468	71130572	ENSG00000124383.8	MPHOSPH10	+	ATG	34	ENST00000244230.6	ENST00000244230.6.1
1288	chr2:74458483-74458594:+	chr2	74458484	74458594	ENSG00000239779.6	WBP1	+	ATG	36	ENST00000233615.6	ENST00000233615.6.1
1289	chr2:74529639-74529783:-	chr2	74529640	74529783	ENSG00000115307.16	AUP1	-	ATG	47	ENST00000377526.3	ENST00000377526.3.1
1290	chr2:102762608-102764388:+	chr2	102762609	102764388	ENSG00000170417.15	TMEM182	+	ATG	45	ENST00000640575.1	ENST00000640575.1.1
1291	chr2:111883960-111884068:-	chr2	111883961	111884068	ENSG00000153107.12	ANAPC1	-	ATG	35	ENST00000341068.7	ENST00000341068.7.1
1292	chr2:119760212-119760281:+	chr2	119760213	119760281	ENSG00000088179.8	PTPN4	+	ATG	22	ENST00000263708.6	ENST00000263708.6.1
1293	chr2:135531529-135531628:+	chr2	135531530	135531628	ENSG00000048991.16	R3HDM1	+	ATG	32	ENST00000409478.5	ENST00000409478.5.1
1294	chr2:152175695-152175872:-	chr2	152175696	152175872	ENSG00000115145.9	STAM2	-	ATG	58	ENST00000263904.4	ENST00000263904.4.1
1295	chr2:201129778-201129853:+	chr2	201129779	201129853	ENSG00000003402.19	CFLAR	+	ATG	24	ENST00000309955.7	ENST00000309955.7.1
1296	chr2:202377209-202377284:+	chr2	202377210	202377284	ENSG00000204217.13	BMPR2	+	ATG	24	ENST00000374580.8	ENST00000374580.8.1
1297	chr2:203016277-203016331:+	chr2	203016278	203016331	ENSG00000144426.18	NBEAL1	+	ATG	17	ENST00000449802.5	ENST00000449802.5.1
1298	chr2:218658797-218659398:-	chr2	218658798	218659398	ENSG00000115568.15	ZNF142	-	ATG	54	ENST00000449707.5	ENST00000449707.5.1
1299	chr2:230068580-230068676:-	chr2	230068581	230068676	ENSG00000163053.10	SLC16A14	-	ATG	31	ENST00000295190.8	ENST00000295190.8.1
1300	chr2:234952159-234995351:+	chr2	234952160	234995351	ENSG00000130147.15	SH3BP4	+	ATG	19	ENST00000392011.6	ENST00000392011.6.2
1301	chr2:240586889-240589377:+	chr2	240586890	240589377	ENSG00000142330.19	CAPN10	+	ATG	65	ENST00000270364.11	ENST00000270364.11.1
1302	chr2:241687288-241687420:+	chr2	241687289	241687420	ENSG00000168395.15	ING5	+	ATG	43	ENST00000636051.1	ENST00000636051.1.1
1303	chr3:9792726-9792798:+	chr3	9792727	9792798	ENSG00000241553.12	ARPC4	+	ATG	23	ENST00000397261.7	ENST00000397261.7.2
1304	chr3:12664058-12664088:-	chr3	12664059	12664088	ENSG00000132155.11	RAF1	-	ATG	9	ENST00000251849.8	ENST00000251849.8.2
1305	chr3:10248423-10248819:+	chr3	10248424	10248819	ENSG00000157014.10	TATDN2	+	ATG	131	ENST00000287652.8	ENST00000287652.8.2
1306	chr3:14122006-14124676:-	chr3	14122007	14124676	ENSG00000163528.12	CHCHD4	-	ATG	33	ENST00000295767.9	ENST00000295767.9.1
1307	chr3:39383449-39383491:+	chr3	39383450	39383491	ENSG00000144659.11	SLC25A38	+	ATG	13	ENST00000273158.9	ENST00000273158.9.1
1308	chr3:38453968-38454130:+	chr3	38453969	38454130	ENSG00000114739.13	ACVR2B	+	ATG	53	ENST00000352511.4	ENST00000352511.4.1
1309	chr3:40525110-40525785:+	chr3	40525111	40525785	ENSG00000172888.11	ZNF621	+	ATG	56	ENST00000339296.9	ENST00000339296.9.1
1310	chr3:66221015-66221072:+	chr3	66221016	66221072	ENSG00000144741.17	SLC25A26	+	ATG	18	ENST00000354883.10	ENST00000354883.10.1
1311	chr3:100400935-100401118:-	chr3	100400936	100401118	ENSG00000154174.7	TOMM70	-	ATG	60	ENST00000284320.5	ENST00000284320.5.1
1312	chr3:120094068-120094176:-	chr3	120094069	120094176	ENSG00000082701.14	GSK3B	-	ATG	35	ENST00000264235.12	ENST00000264235.12.1
1313	chr3:129439765-129440011:-	chr3	129439766	129440011	ENSG00000129071.9	MBD4	-	ATG	81	ENST00000429544.6	ENST00000429544.6.1
1314	chr3:150408669-150408696:+	chr3	150408670	150408696	ENSG00000196428.12	TSC22D2	+	ATG	8	ENST00000361875.7	ENST00000361875.7.1
1315	chr3:156674661-156674706:+	chr3	156674662	156674706	ENSG00000163659.12	TIPARP	+	ATG	14	ENST00000295924.11	ENST00000295924.11.1
1316	chr3:183643531-183650341:+	chr3	183643532	183650341	ENSG00000114796.15	KLHL24	+	ATG	18	ENST00000454652.6	ENST00000454652.6.1
1317	chr3:171460320-171460395:-	chr3	171460321	171460395	ENSG00000154310.16	TNIK	-	ATG	24	ENST00000436636.6	ENST00000436636.6.1
1318	chr3:183269702-183269780:+	chr3	183269703	183269780	ENSG00000176597.11	B3GNT5	+	ATG	25	ENST00000326505.3	ENST00000326505.3.1
1319	chr3:196503293-196503395:-	chr3	196503294	196503395	ENSG00000163961.4	RNF168	-	ATG	33	ENST00000318037.3	ENST00000318037.3.2
1320	chr3:196708680-196711953:-	chr3	196708681	196711953	ENSG00000174007.7	CEP19	-	ATG	23	ENST00000409690.3	ENST00000409690.3.1
1321	chr4:15686305-15686362:+	chr4	15686306	15686362	ENSG00000237765.6	FAM200B	+	ATG	18	ENST00000422728.2	ENST00000422728.2.1
1322	chr4:25026924-25030859:-	chr4	25026925	25030859	ENSG00000153012.11	LGI2	-	ATG	149	ENST00000382114.8	ENST00000382114.8.1
1323	chr4:39976607-39977467:-	chr4	39976608	39977467	ENSG00000121892.14	PDS5A	-	ATG	6	ENST00000303538.12	ENST00000303538.12.1
1324	chr4:56907926-56908046:+	chr4	56907927	56908046	ENSG00000084093.16	REST	+	ATG	39	ENST00000309042.11	ENST00000309042.11.1
1325	chr4:86594599-86594764:+	chr4	86594600	86594764	ENSG00000163629.12	PTPN13	+	ATG	54	ENST00000427191.6	ENST00000427191.6.1
1326	chr4:86594355-86594451:+	chr4	86594356	86594451	ENSG00000163629.12	PTPN13	+	ATG	31	ENST00000427191.6	ENST00000427191.6.2
1327	chr4:103076263-103076299:-	chr4	103076264	103076299	ENSG00000164038.14	SLC9B2	-	ATG	11	ENST00000362026.7	ENST00000362026.7.1
1328	chr4:112232017-112232161:+	chr4	112232018	112232161	ENSG00000138660.11	AP1AR	+	ATG	47	ENST00000274000.9	ENST00000274000.9.2
1329	chr4:174283857-174284253:-	chr4	174283858	174284253	ENSG00000164117.13	FBXO8	-	ATG	131	ENST00000393674.6	ENST00000393674.6.1
1330	chr5:14871634-14871766:-	chr5	14871635	14871766	ENSG00000154122.13	ANKH	-	ATG	43	ENST00000284268.7	ENST00000284268.7.2
1331	chr5:31529078-31530812:-	chr5	31529079	31530812	ENSG00000113360.16	DROSHA	-	ATG	13	ENST00000511367.6	ENST00000511367.6.1
1332	chr5:31530855-31530891:-	chr5	31530856	31530891	ENSG00000113360.16	DROSHA	-	ATG	11	ENST00000511367.6	ENST00000511367.6.2
1333	chr5:52788060-52788153:+	chr5	52788061	52788153	ENSG00000213949.8	ITGA1	+	ATG	30	ENST00000282588.6	ENST00000282588.6.1
1334	chr5:65988635-65992716:+	chr5	65988636	65992716	ENSG00000112851.14	ERBIN	+	ATG	17	ENST00000284037.9	ENST00000284037.9.1
1335	chr5:74763680-74766944:-	chr5	74763681	74766944	ENSG00000164347.17	GFM2	-	ATG	30	ENST00000296805.7	ENST00000296805.7.1
1336	chr5:77087114-77087249:-	chr5	77087115	77087249	ENSG00000132846.5	ZBED3	-	ATG	44	ENST00000255198.2	ENST00000255198.2.2
1337	chr5:79512921-79512990:-	chr5	79512922	79512990	ENSG00000152413.14	HOMER1	-	ATG	22	ENST00000334082.10	ENST00000334082.10.1
1338	chr5:102865829-102865907:+	chr5	102865830	102865907	ENSG00000145730.20	PAM	+	ATG	25	ENST00000438793.7	ENST00000438793.7.1
1339	chr5:103120412-103129364:+	chr5	103120413	103129364	ENSG00000145725.19	PPIP5K2	+	ATG	44	ENST00000321521.13	ENST00000321521.13.1
1340	chr5:116574364-116574397:-	chr5	116574365	116574397	ENSG00000092421.16	SEMA6A	-	ATG	10	ENST00000343348.10	ENST00000343348.10.1
1341	chr5:136147886-136153598:+	chr5	136147887	136153598	ENSG00000113658.17	SMAD5	+	ATG	8	ENST00000545279.5	ENST00000545279.5.1
1342	chr5:141970807-141970828:+	chr5	141970808	141970828	ENSG00000013561.17	RNF14	+	ATG	6	ENST00000394520.6	ENST00000394520.6.1
1343	chr5:141476010-141476052:+	chr5	141476011	141476052	ENSG00000240184.6	PCDHGC3	+	ATG	13	ENST00000617641.4	ENST00000617641.4.1
1344	chr5:173328563-173328977:-	chr5	173328564	173328977	ENSG00000113739.10	STC2	-	ATG	137	ENST00000265087.8	ENST00000265087.8.2
1345	chr5:173329206-173329407:-	chr5	173329207	173329407	ENSG00000113739.10	STC2	-	ATG	66	ENST00000265087.8	ENST00000265087.8.3
1346	chr5:181223338-181223509:+	chr5	181223339	181223509	ENSG00000146063.19	TRIM41	+	ATG	56	ENST00000315073.9	ENST00000315073.9.1
1347	chr6:16328341-16328431:-	chr6	16328342	16328431	ENSG00000124788.18	ATXN1	-	ATG	29	ENST00000244769.8	ENST00000244769.8.1
1348	chr6:24720243-24720330:-	chr6	24720244	24720330	ENSG00000112308.12	C6orf62	-	ATG	28	ENST00000378119.8	ENST00000378119.8.3
1349	chr6:28281798-28281843:+	chr6	28281799	28281843	ENSG00000137338.5	PGBD1	+	ATG	14	ENST00000259883.3	ENST00000259883.3.1
1350	chr6:37354078-37354141:+	chr6	37354079	37354141	ENSG00000112130.16	RNF8	+	ATG	20	ENST00000373479.8	ENST00000373479.8.1
1351	chr6:37697463-37697913:-	chr6	37697464	37697913	ENSG00000112139.14	MDGA1	-	ATG	149	ENST00000434837.7	ENST00000434837.7.1
1352	chr6:43171590-43171626:+	chr6	43171591	43171626	ENSG00000112658.7	SRF	+	ATG	11	ENST00000265354.5	ENST00000265354.5.1
1353	chr6:82247567-82247627:-	chr6	82247568	82247627	ENSG00000005700.14	IBTK	-	ATG	19	ENST00000306270.11	ENST00000306270.11.1
1354	chr6:98926881-98934770:-	chr6	98926882	98934770	ENSG00000112234.8	FBXL4	-	ATG	101	ENST00000369244.6	ENST00000369244.6.1
1355	chr6:105161968-105161992:-	chr6	105161969	105161992	ENSG00000132429.9	POPDC3	-	ATG	7	ENST00000254765.3	ENST00000254765.3.1
1356	chr6:105133518-105137168:-	chr6	105133519	105137168	ENSG00000112276.13	BVES	-	ATG	89	ENST00000314641.9	ENST00000314641.9.1
1357	chr6:109094387-109094471:-	chr6	109094388	109094471	ENSG00000080546.13	SESN1	-	ATG	27	ENST00000436639.6	ENST00000436639.6.1
1358	chr6:125781179-125781245:+	chr6	125781180	125781245	ENSG00000111912.19	NCOA7	+	ATG	21	ENST00000368357.7	ENST00000368357.7.1
1359	chr6:132814551-132814759:+	chr6	132814552	132814759	ENSG00000112306.7	RPS12	+	ATG	29	ENST00000230050.3	ENST00000230050.3.1
1360	chr7:519355-519397:-	chr7	519356	519397	ENSG00000197461.13	PDGFA	-	ATG	13	ENST00000402802.7	ENST00000402802.7.2
1361	chr7:30284931-30285066:+	chr7	30284932	30285066	ENSG00000180233.10	ZNRF2	+	ATG	44	ENST00000323037.4	ENST00000323037.4.1
1362	chr7:45109218-45111669:-	chr7	45109219	45111669	ENSG00000136270.13	TBRG4	-	ATG	24	ENST00000395655.8	ENST00000395655.8.1
1363	chr7:50674628-50674655:-	chr7	50674629	50674655	ENSG00000106070.18	GRB10	-	ATG	8	ENST00000335866.7	ENST00000335866.7.1
1364	chr7:98106981-98107083:+	chr7	98106982	98107083	ENSG00000164715.5	LMTK2	+	ATG	33	ENST00000297293.5	ENST00000297293.5.1
1365	chr7:100612768-100612915:+	chr7	100612769	100612915	ENSG00000106330.11	MOSPD3	+	ATG	48	ENST00000223054.8	ENST00000223054.8.1
1366	chr7:103029417-103074770:-	chr7	103029418	103074770	ENSG00000161040.16	FBXL13	-	ATG	59	ENST00000379305.7	ENST00000379305.7.1
1367	chr7:150325942-150325969:+	chr7	150325943	150325969	ENSG00000127399.14	LRRC61	+	ATG	8	ENST00000359623.8	ENST00000359623.8.1
1368	chr7:151080762-151080789:-	chr7	151080763	151080789	ENSG00000164896.19	FASTK	-	ATG	8	ENST00000482571.2	ENST00000482571.2.1
1369	chr7:151082585-151083545:-	chr7	151082586	151083545	ENSG00000164897.12	TMUB1	-	ATG	39	ENST00000297533.8	ENST00000297533.8.1
1370	chr7:156892999-156893047:-	chr7	156893000	156893047	ENSG00000105983.20	LMBR1	-	ATG	15	ENST00000353442.9	ENST00000353442.9.1
1371	chr8:17923003-17923036:+	chr8	17923004	17923036	ENSG00000078674.17	PCM1	+	ATG	10	ENST00000325083.12	ENST00000325083.12.1
1372	chr8:28502707-28502737:+	chr8	28502708	28502737	ENSG00000104290.10	FZD3	+	ATG	9	ENST00000240093.7	ENST00000240093.7.1
1373	chr8:41598860-41598998:+	chr8	41598861	41598998	ENSG00000158669.11	AGPAT6	+	ATG	45	ENST00000396987.7	ENST00000396987.7.2
1374	chr8:42049150-42049237:-	chr8	42049151	42049237	ENSG00000083168.9	KAT6A	-	ATG	28	ENST00000406337.5	ENST00000406337.5.2
1375	chr8:42049007-42049085:-	chr8	42049008	42049085	ENSG00000083168.9	KAT6A	-	ATG	25	ENST00000406337.5	ENST00000406337.5.3
1376	chr8:38457459-38457492:-	chr8	38457460	38457492	ENSG00000077782.19	FGFR1	-	ATG	10	ENST00000397091.9	ENST00000397091.9.1
1377	chr8:69832821-69832989:-	chr8	69832822	69832989	ENSG00000137571.10	SLCO5A1	-	ATG	55	ENST00000260126.8	ENST00000260126.8.1
1378	chr8:78516310-78516457:+	chr8	78516311	78516457	ENSG00000171033.12	PKIA	+	ATG	48	ENST00000396418.6	ENST00000396418.6.1
1379	chr8:81713961-81714875:-	chr8	81713962	81714875	ENSG00000104231.10	ZFAND1	-	ATG	49	ENST00000523361.5	ENST00000523361.5.1
1380	chr8:118111228-118111342:-	chr8	118111229	118111342	ENSG00000182197.10	EXT1	-	ATG	37	ENST00000378204.6	ENST00000378204.6.2
1381	chr8:118111551-118111599:-	chr8	118111552	118111599	ENSG00000182197.10	EXT1	-	ATG	15	ENST00000378204.6	ENST00000378204.6.3
1382	chr8:123256014-123256089:-	chr8	123256015	123256089	ENSG00000165156.14	ZHX1	-	ATG	24	ENST00000395571.7	ENST00000395571.7.1
1383	chr8:126558093-126558195:-	chr8	126558094	126558195	ENSG00000168672.3	FAM84B	-	ATG	33	ENST00000304916.3	ENST00000304916.3.1
1384	chr8:125083951-125084014:-	chr8	125083952	125084014	ENSG00000164961.15	WASHC5	-	ATG	20	ENST00000318410.11	ENST00000318410.11.1
1385	chr8:144497082-144497316:+	chr8	144497083	144497316	ENSG00000160972.9	PPP1R16A	+	ATG	77	ENST00000292539.8	ENST00000292539.8.2
1386	chr9:22009006-22009084:-	chr9	22009007	22009084	ENSG00000147883.10	CDKN2B	-	ATG	25	ENST00000276925.6	ENST00000276925.6.1
1387	chr9:32552341-32552386:+	chr9	32552342	32552386	ENSG00000235453.10	RP11-205M20.3	+	ATG	14	ENST00000451672.2	ENST00000451672.2.1
1388	chr9:20622328-20622508:-	chr9	20622329	20622508	ENSG00000171843.15	MLLT3	-	ATG	59	ENST00000380338.8	ENST00000380338.8.1
1389	chr9:34126411-34126504:-	chr9	34126412	34126504	ENSG00000198876.12	DCAF12	-	ATG	30	ENST00000361264.8	ENST00000361264.8.1
1390	chr9:34336279-34338812:+	chr9	34336280	34338812	ENSG00000164978.17	NUDT2	+	ATG	53	ENST00000379158.6	ENST00000379158.6.1
1391	chr9:35605548-35605593:+	chr9	35605549	35605593	ENSG00000107140.15	TESK1	+	ATG	14	ENST00000336395.5	ENST00000336395.5.1
1392	chr9:35748784-35748958:-	chr9	35748785	35748958	ENSG00000070610.14	GBA2	-	ATG	57	ENST00000378103.7	ENST00000378103.7.1
1393	chr9:86947059-86947134:-	chr9	86947060	86947134	ENSG00000180447.6	GAS1	-	ATG	24	ENST00000298743.8	ENST00000298743.8.1
1394	chr9:83980860-83999720:+	chr9	83980861	83999720	ENSG00000178966.16	RMI1	+	ATG	51	ENST00000325875.7	ENST00000325875.7.1
1395	chr9:79572190-79572214:+	chr9	79572191	79572214	ENSG00000106829.18	TLE4	+	ATG	7	ENST00000376552.6	ENST00000376552.6.1
1396	chr9:96776068-96777620:-	chr9	96776069	96777620	ENSG00000081386.12	ZNF510	-	ATG	71	ENST00000375231.5	ENST00000375231.5.2
1397	chr9:98119090-98119192:-	chr9	98119091	98119192	ENSG00000106785.14	TRIM14	-	ATG	33	ENST00000375098.7	ENST00000375098.7.1
1398	chr9:122264695-122264866:+	chr9	122264696	122264866	ENSG00000148187.17	MRRF	+	ATG	56	ENST00000344641.7	ENST00000344641.7.1
1399	chr9:128322700-128322745:+	chr9	128322701	128322745	ENSG00000167113.10	COQ4	+	ATG	14	ENST00000300452.7	ENST00000300452.7.2
1400	chr9:130714089-130714203:+	chr9	130714090	130714203	ENSG00000097007.17	ABL1	+	ATG	37	ENST00000372348.6	ENST00000372348.6.1
1401	chr9:130444942-130452317:+	chr9	130444943	130452317	ENSG00000130707.17	ASS1	+	ATG	48	ENST00000352480.9	ENST00000352480.9.1
1402	chr9:136944025-136944091:-	chr9	136944026	136944091	ENSG00000159069.13	FBXW5	-	ATG	21	ENST00000325285.7	ENST00000325285.7.1
1403	chr9:134026524-134026620:+	chr9	134026525	134026620	ENSG00000235106.9	RP11-374P20.5	+	ATG	31	ENST00000603928.2	ENST00000603928.2.2
1404	chr9:137301965-137302118:-	chr9	137301966	137302118	ENSG00000198435.3	NRARP	-	ATG	50	ENST00000356628.3	ENST00000356628.3.1
1405	chr10:6089166-6097053:+	chr10	6089167	6097053	ENSG00000134453.15	RBM17	+	ATG	10	ENST00000379888.8	ENST00000379888.8.1
1406	chr10:5685114-5712857:+	chr10	5685115	5712857	ENSG00000108021.20	FAM208B	+	ATG	31	ENST00000328090.9	ENST00000328090.9.1
1407	chr10:21497042-21497138:-	chr10	21497043	21497138	ENSG00000204682.5	CASC10	-	ATG	31	ENST00000377113.5	ENST00000377113.5.1
1408	chr10:15860286-15860352:-	chr10	15860287	15860352	ENSG00000148481.13	FAM188A	-	ATG	21	ENST00000277632.7	ENST00000277632.7.1
1409	chr10:30437365-30438964:+	chr10	30437366	30438964	ENSG00000107968.9	MAP3K8	+	ATG	29	ENST00000263056.5	ENST00000263056.5.1
1410	chr10:28532786-28532897:+	chr10	28532787	28532897	ENSG00000095787.21	WAC	+	ATG	36	ENST00000375664.8	ENST00000375664.8.2
1411	chr10:50460756-50460792:-	chr10	50460757	50460792	ENSG00000198964.13	SGMS1	-	ATG	11	ENST00000361781.6	ENST00000361781.6.2
1412	chr10:68572292-68572514:+	chr10	68572293	68572514	ENSG00000138336.8	TET1	+	ATG	73	ENST00000373644.4	ENST00000373644.4.1
1413	chr10:88880150-88901656:+	chr10	88880151	88901656	ENSG00000138134.11	STAMBPL1	+	ATG	162	ENST00000371927.7	ENST00000371927.7.1
1414	chr10:86521696-86521741:-	chr10	86521697	86521741	ENSG00000062650.18	WAPL	-	ATG	14	ENST00000298767.9	ENST00000298767.9.2
1415	chr10:87863708-87863846:+	chr10	87863709	87863846	ENSG00000171862.10	PTEN	+	ATG	45	ENST00000371953.7	ENST00000371953.7.1
1416	chr10:97619662-97633484:-	chr10	97619663	97633484	ENSG00000171160.17	MORN4	-	ATG	52	ENST00000478953.1	ENST00000478953.1.1
1417	chr10:96129898-96132617:+	chr10	96129899	96132617	ENSG00000177853.14	ZNF518A	+	ATG	41	ENST00000316045.9	ENST00000316045.9.1
1418	chr10:114938227-114938296:+	chr10	114938228	114938296	ENSG00000165832.5	TRUB1	+	ATG	22	ENST00000298746.4	ENST00000298746.4.1
1419	chr10:118046277-118046391:-	chr10	118046278	118046391	ENSG00000107560.10	RAB11FIP2	-	ATG	37	ENST00000355624.7	ENST00000355624.7.1
1420	chr10:121593864-121593897:-	chr10	121593865	121593897	ENSG00000066468.22	FGFR2	-	ATG	10	ENST00000358487.9	ENST00000358487.9.1
1421	chr10:133302945-133302966:-	chr10	133302946	133302966	ENSG00000130640.13	TUBGCP2	-	ATG	6	ENST00000252936.7	ENST00000252936.7.1
1422	chr11:208065-208119:+	chr11	208066	208119	ENSG00000177963.14	RIC8A	+	ATG	17	ENST00000526104.5	ENST00000526104.5.3
1423	chr11:2402314-2402338:+	chr11	2402315	2402338	ENSG00000184281.14	TSSC4	+	ATG	7	ENST00000380996.9	ENST00000380996.9.2
1424	chr11:9265172-9265274:-	chr11	9265173	9265274	ENSG00000184014.7	DENND5A	-	ATG	33	ENST00000328194.7	ENST00000328194.7.1
1425	chr11:10751054-10751171:+	chr11	10751055	10751171	ENSG00000198730.8	CTR9	+	ATG	38	ENST00000361367.6	ENST00000361367.6.1
1426	chr11:36296378-36401125:+	chr11	36296379	36401125	ENSG00000135362.13	PRR5L	+	ATG	62	ENST00000530639.5	ENST00000530639.5.1
1427	chr11:45805654-45805735:+	chr11	45805655	45805735	ENSG00000181830.8	SLC35C1	+	ATG	26	ENST00000314134.3	ENST00000314134.3.3
1428	chr11:57673055-57673163:+	chr11	57673056	57673163	ENSG00000156599.10	ZDHHC5	+	ATG	35	ENST00000287169.7	ENST00000287169.7.1
1429	chr11:57667926-57668016:+	chr11	57667927	57668016	ENSG00000156599.10	ZDHHC5	+	ATG	29	ENST00000287169.7	ENST00000287169.7.2
1430	chr11:57672203-57672269:+	chr11	57672204	57672269	ENSG00000156599.10	ZDHHC5	+	ATG	21	ENST00000287169.7	ENST00000287169.7.3
1431	chr11:61333295-61333316:+	chr11	61333296	61333316	ENSG00000149476.15	TKFC	+	ATG	6	ENST00000394900.7	ENST00000394900.7.1
1432	chr11:61362196-61362280:-	chr11	61362197	61362280	ENSG00000162144.9	CYB561A3	-	ATG	27	ENST00000294072.8	ENST00000294072.8.2
1433	chr11:63813414-63813462:+	chr11	63813415	63813462	ENSG00000168005.8	C11orf84	+	ATG	15	ENST00000294244.8	ENST00000294244.8.1
1434	chr11:65613870-65613930:-	chr11	65613871	65613930	ENSG00000173327.7	MAP3K11	-	ATG	19	ENST00000309100.7	ENST00000309100.7.1
1435	chr11:65640884-65640986:+	chr11	65640885	65640986	ENSG00000213445.9	SIPA1	+	ATG	33	ENST00000534313.5	ENST00000534313.5.1
1436	chr11:67505210-67505324:-	chr11	67505211	67505324	ENSG00000110697.12	PITPNM1	-	ATG	37	ENST00000436757.6	ENST00000436757.6.1
1437	chr11:73876792-73876840:-	chr11	73876793	73876840	ENSG00000181924.6	CHCHD8	-	ATG	15	ENST00000355693.4	ENST00000355693.4.1
1438	chr11:102348659-102348692:+	chr11	102348660	102348692	ENSG00000110330.8	BIRC2	+	ATG	10	ENST00000227758.6	ENST00000227758.6.1
1439	chr11:118365058-118365079:+	chr11	118365059	118365079	ENSG00000110344.9	UBE4A	+	ATG	6	ENST00000252108.7	ENST00000252108.7.1
1440	chr12:389167-389197:-	chr12	389168	389197	ENSG00000073614.12	KDM5A	-	ATG	9	ENST00000399788.6	ENST00000399788.6.1
1441	chr12:753222-753300:+	chr12	753223	753300	ENSG00000060237.16	WNK1	+	ATG	25	ENST00000535572.5	ENST00000535572.5.2
1442	chr12:7936124-7936205:-	chr12	7936125	7936205	ENSG00000059804.15	SLC2A3	-	ATG	26	ENST00000075120.11	ENST00000075120.11.1
1443	chr12:12343381-12350113:-	chr12	12343382	12350113	ENSG00000111261.13	MANSC1	-	ATG	22	ENST00000535902.5	ENST00000535902.5.1
1444	chr12:42325982-42326024:-	chr12	42325983	42326024	ENSG00000139168.7	ZCRB1	-	ATG	13	ENST00000266529.7	ENST00000266529.7.1
1445	chr12:49106993-49110569:-	chr12	49106994	49110569	ENSG00000139636.15	LMBR1L	-	ATG	45	ENST00000267102.12	ENST00000267102.12.1
1446	chr12:49348067-49348772:+	chr12	49348068	49348772	ENSG00000178401.14	DNAJC22	+	ATG	14	ENST00000549441.6	ENST00000549441.6.1
1447	chr12:49806032-49828372:-	chr12	49806033	49828372	ENSG00000167566.16	NCKAP5L	-	ATG	19	ENST00000335999.6	ENST00000335999.6.1
1448	chr12:50057628-50057655:+	chr12	50057629	50057655	ENSG00000110881.11	ASIC1	+	ATG	8	ENST00000228468.8	ENST00000228468.8.1
1449	chr12:54017295-54053923:+	chr12	54017296	54053923	ENSG00000198353.7	HOXC4	+	ATG	80	ENST00000303406.4	ENST00000303406.4.1
1450	chr12:55729434-55729596:-	chr12	55729435	55729596	ENSG00000135404.11	CD63	-	ATG	53	ENST00000549117.5	ENST00000549117.5.1
1451	chr12:57395760-57395793:-	chr12	57395761	57395793	ENSG00000179912.20	R3HDM2	-	ATG	10	ENST00000347140.7	ENST00000347140.7.1
1452	chr12:64409961-64410027:+	chr12	64409962	64410027	ENSG00000184575.11	XPOT	+	ATG	21	ENST00000332707.9	ENST00000332707.9.1
1453	chr12:69739456-69739555:+	chr12	69739457	69739555	ENSG00000127328.21	RAB3IP	+	ATG	32	ENST00000550536.5	ENST00000550536.5.1
1454	chr12:71686619-71686643:+	chr12	71686620	71686643	ENSG00000139291.13	TMEM19	+	ATG	7	ENST00000266673.9	ENST00000266673.9.2
1455	chr12:68808380-68808425:+	chr12	68808381	68808425	ENSG00000135679.23	MDM2	+	ATG	14	ENST00000258149.9	ENST00000258149.9.2
1456	chr12:98644740-98644896:-	chr12	98644741	98644896	ENSG00000166130.14	IKBIP	-	ATG	51	ENST00000342502.6	ENST00000342502.6.1
1457	chr12:111406242-111418149:+	chr12	111406243	111418149	ENSG00000111252.10	SH2B3	+	ATG	21	ENST00000341259.6	ENST00000341259.6.1
1458	chr12:110614105-110614186:+	chr12	110614106	110614186	ENSG00000204852.15	TCTN1	+	ATG	26	ENST00000551590.5	ENST00000551590.5.1
1459	chr12:111842023-111842197:+	chr12	111842024	111842197	ENSG00000089022.13	MAPKAPK5	+	ATG	57	ENST00000550735.6	ENST00000550735.6.2
1460	chr12:113186291-113186750:+	chr12	113186292	113186750	ENSG00000139405.15	RITA1	+	ATG	30	ENST00000548278.1	ENST00000548278.1.2
1461	chr12:113185914-113185989:+	chr12	113185915	113185989	ENSG00000139405.15	RITA1	+	ATG	24	ENST00000548278.1	ENST00000548278.1.3
1462	chr12:123230456-123230486:-	chr12	123230457	123230486	ENSG00000051825.14	MPHOSPH9	-	ATG	9	ENST00000606320.5	ENST00000606320.5.1
1463	chr12:124011953-124012040:+	chr12	124011954	124012040	ENSG00000179195.15	ZNF664	+	ATG	28	ENST00000539644.5	ENST00000539644.5.2
1464	chr12:123972553-123972616:-	chr12	123972554	123972616	ENSG00000119242.8	CCDC92	-	ATG	20	ENST00000238156.7	ENST00000238156.7.1
1465	chr12:133080976-133081272:+	chr12	133080977	133081272	ENSG00000196387.9	ZNF140	+	ATG	31	ENST00000355557.6	ENST00000355557.6.1
1466	chr13:26221270-26221330:-	chr13	26221271	26221330	ENSG00000127870.16	RNF6	-	ATG	19	ENST00000381588.8	ENST00000381588.8.1
1467	chr13:36283698-36297719:-	chr13	36283699	36297719	ENSG00000250709.1	CCDC169-SOHLH2	-	ATG	28	ENST00000511166.1	ENST00000511166.1.1
1468	chr13:67229884-67229983:-	chr13	67229885	67229983	ENSG00000184226.14	PCDH9	-	ATG	32	ENST00000544246.5	ENST00000544246.5.1
1469	chr13:102799339-102799420:+	chr13	102799340	102799420	ENSG00000134897.13	BIVM	+	ATG	26	ENST00000257336.5	ENST00000257336.5.2
1470	chr14:24114993-24115098:+	chr14	24114994	24115098	ENSG00000100897.17	DCAF11	+	ATG	34	ENST00000446197.7	ENST00000446197.7.1
1471	chr14:35121925-35121988:-	chr14	35121926	35121988	ENSG00000092020.10	PPP2R3C	-	ATG	20	ENST00000261475.9	ENST00000261475.9.1
1472	chr14:39103157-39103214:-	chr14	39103158	39103214	ENSG00000100934.14	SEC23A	-	ATG	18	ENST00000307712.10	ENST00000307712.10.1
1473	chr14:49852736-49852997:-	chr14	49852737	49852997	ENSG00000165525.17	NEMF	-	ATG	86	ENST00000298310.9	ENST00000298310.9.1
1474	chr14:44962384-44962525:+	chr14	44962385	44962525	ENSG00000198718.12	TOGARAM1	+	ATG	46	ENST00000361577.7	ENST00000361577.7.1
1475	chr14:50668006-50668138:-	chr14	50668007	50668138	ENSG00000151748.14	SAV1	-	ATG	43	ENST00000324679.4	ENST00000324679.4.2
1476	chr14:55027412-55043015:+	chr14	55027413	55043015	ENSG00000180008.8	SOCS4	+	ATG	40	ENST00000395472.2	ENST00000395472.2.2
1477	chr14:70907577-70907754:+	chr14	70907578	70907754	ENSG00000100731.15	PCNX1	+	ATG	58	ENST00000304743.6	ENST00000304743.6.1
1478	chr14:73892090-73892123:+	chr14	73892091	73892123	ENSG00000119725.18	ZNF410	+	ATG	10	ENST00000555044.5	ENST00000555044.5.1
1479	chr14:74692087-74692183:-	chr14	74692088	74692183	ENSG00000119682.16	AREL1	-	ATG	31	ENST00000356357.8	ENST00000356357.8.1
1480	chr14:80916495-80939464:-	chr14	80916496	80939464	ENSG00000100629.16	C14orf145	-	ATG	48	ENST00000555265.5	ENST00000555265.5.1
1481	chr14:104795514-104795553:-	chr14	104795515	104795553	ENSG00000142208.15	AKT1	-	ATG	12	ENST00000349310.7	ENST00000349310.7.1
1482	chr15:43777413-43777482:+	chr15	43777414	43777482	ENSG00000140264.19	SERF2	+	ATG	22	ENST00000381359.5	ENST00000381359.5.2
1483	chr15:45522419-45522467:-	chr15	45522420	45522467	ENSG00000104154.6	SLC30A4	-	ATG	15	ENST00000261867.4	ENST00000261867.4.1
1484	chr15:50424463-50424493:+	chr15	50424464	50424493	ENSG00000138592.13	USP8	+	ATG	9	ENST00000396444.7	ENST00000396444.7.2
1485	chr15:58771325-58771373:+	chr15	58771326	58771373	ENSG00000128923.10	FAM63B	+	ATG	15	ENST00000559228.5	ENST00000559228.5.1
1486	chr15:77690870-77734999:-	chr15	77690871	77734999	ENSG00000169783.12	LINGO1	-	ATG	12	ENST00000570216.5	ENST00000570216.5.1
1487	chr15:81001888-81001969:+	chr15	81001889	81001969	ENSG00000140406.3	MESDC1	+	ATG	26	ENST00000267984.3	ENST00000267984.3.4
1488	chr15:84982065-84982116:+	chr15	84982066	84982116	ENSG00000073417.14	PDE8A	+	ATG	16	ENST00000310298.8	ENST00000310298.8.1
1489	chr15:89333820-89333892:-	chr15	89333821	89333892	ENSG00000140521.12	POLG	-	ATG	23	ENST00000268124.9	ENST00000268124.9.1
1490	chr16:3443766-3476227:+	chr16	3443767	3476227	ENSG00000122390.17	NAA60	+	ATG	48	ENST00000407558.8	ENST00000407558.8.1
1491	chr16:19114390-19114510:+	chr16	19114391	19114510	ENSG00000205730.6	ITPRIPL2	+	ATG	39	ENST00000381440.4	ENST00000381440.4.1
1492	chr16:31073942-31074008:-	chr16	31073943	31074008	ENSG00000167394.12	ZNF668	-	ATG	21	ENST00000300849.4	ENST00000300849.4.1
1493	chr16:31109046-31109106:+	chr16	31109047	31109106	ENSG00000103507.13	BCKDK	+	ATG	19	ENST00000394951.5	ENST00000394951.5.1
1494	chr16:50749576-50749672:+	chr16	50749577	50749672	ENSG00000083799.17	CYLD	+	ATG	31	ENST00000427738.7	ENST00000427738.7.2
1495	chr16:57735794-57736988:+	chr16	57735795	57736988	ENSG00000140854.12	KATNB1	+	ATG	23	ENST00000379661.7	ENST00000379661.7.1
1496	chr16:67571148-67571187:+	chr16	67571149	67571187	ENSG00000102974.15	CTCF	+	ATG	12	ENST00000264010.9	ENST00000264010.9.1
1497	chr16:71454158-71456796:-	chr16	71454159	71456796	ENSG00000167377.17	ZNF23	-	ATG	30	ENST00000357254.8	ENST00000357254.8.1
1498	chr16:89490470-89490536:-	chr16	89490471	89490536	ENSG00000167522.15	ANKRD11	-	ATG	21	ENST00000301030.9	ENST00000301030.9.2
1499	chr17:3690956-3696054:-	chr17	3690957	3696054	ENSG00000083454.21	P2RX5	-	ATG	135	ENST00000552276.5	ENST00000552276.5.1
1500	chr17:7405578-7405605:+	chr17	7405579	7405605	ENSG00000169992.9	NLGN2	+	ATG	8	ENST00000575301.5	ENST00000575301.5.1
1501	chr17:7466736-7484023:-	chr17	7466737	7484023	ENSG00000174282.11	ZBTB4	-	ATG	54	ENST00000311403.4	ENST00000311403.4.1
1502	chr17:16215472-16215526:-	chr17	16215473	16215526	ENSG00000141027.20	NCOR1	-	ATG	17	ENST00000268712.7	ENST00000268712.7.1
1503	chr17:16567766-16567805:-	chr17	16567767	16567805	ENSG00000141040.14	ZNF287	-	ATG	12	ENST00000395825.3	ENST00000395825.3.1
1504	chr17:17681719-17681779:+	chr17	17681720	17681779	ENSG00000108557.18	RAI1	+	ATG	19	ENST00000353383.5	ENST00000353383.5.1
1505	chr17:19282952-19282997:+	chr17	19282953	19282997	ENSG00000072134.15	EPN2	+	ATG	14	ENST00000314728.9	ENST00000314728.9.2
1506	chr17:19977722-19977800:-	chr17	19977723	19977800	ENSG00000108599.14	AKAP10	-	ATG	25	ENST00000225737.10	ENST00000225737.10.1
1507	chr17:29451486-29451507:+	chr17	29451487	29451507	ENSG00000160551.11	TAOK1	+	ATG	6	ENST00000261716.7	ENST00000261716.7.1
1508	chr17:40100119-40100311:-	chr17	40100120	40100311	ENSG00000126368.5	NR1D1	-	ATG	63	ENST00000246672.3	ENST00000246672.3.1
1509	chr17:40122308-40122479:+	chr17	40122309	40122479	ENSG00000188895.11	MSL1	+	ATG	56	ENST00000398532.8	ENST00000398532.8.1
1510	chr17:56978109-56978229:+	chr17	56978110	56978229	ENSG00000121064.12	SCPEP1	+	ATG	39	ENST00000262288.7	ENST00000262288.7.1
1511	chr17:57085380-57105446:+	chr17	57085381	57105446	ENSG00000121057.12	AKAP1	+	ATG	7	ENST00000337714.7	ENST00000337714.7.1
1512	chr17:58417122-58417215:-	chr17	58417123	58417215	ENSG00000108375.12	RNF43	-	ATG	30	ENST00000407977.6	ENST00000407977.6.1
1513	chr17:63826928-63827159:-	chr17	63826929	63827159	ENSG00000108592.16	FTSJ3	-	ATG	35	ENST00000427159.6	ENST00000427159.6.1
1514	chr17:67239480-67243813:-	chr17	67239481	67243813	ENSG00000198265.11	HELZ	-	ATG	12	ENST00000358691.9	ENST00000358691.9.1
1515	chr17:68248064-68248157:+	chr17	68248065	68248157	ENSG00000196704.11	AMZ2	+	ATG	30	ENST00000359904.7	ENST00000359904.7.3
1516	chr17:76550879-76550948:-	chr17	76550880	76550948	ENSG00000161544.9	CYGB	-	ATG	22	ENST00000589145.1	ENST00000589145.1.1
1517	chr17:81239272-81239374:+	chr17	81239273	81239374	ENSG00000224877.3	C17orf89	+	ATG	33	ENST00000431388.2	ENST00000431388.2.1
1518	chr18:11689339-11689366:+	chr18	11689340	11689366	ENSG00000141404.15	GNAL	+	ATG	8	ENST00000334049.10	ENST00000334049.10.1
1519	chr18:32092046-32092082:+	chr18	32092047	32092082	ENSG00000134758.13	RNF138	+	ATG	11	ENST00000261593.7	ENST00000261593.7.2
1520	chr18:48950147-48950594:-	chr18	48950148	48950594	ENSG00000101665.8	SMAD7	-	ATG	148	ENST00000262158.6	ENST00000262158.6.1
1521	chr18:51046933-51047023:+	chr18	51046934	51047023	ENSG00000141646.13	SMAD4	+	ATG	29	ENST00000398417.6	ENST00000398417.6.1
1522	chr18:61816563-61892840:-	chr18	61816564	61892840	ENSG00000176641.10	RNF152	-	ATG	26	ENST00000312828.3	ENST00000312828.3.1
1523	chr19:1021083-1021110:-	chr19	1021084	1021110	ENSG00000182087.13	TMEM259	-	ATG	8	ENST00000356663.7	ENST00000356663.7.1
1524	chr19:6361456-6361534:+	chr19	6361457	6361534	ENSG00000125656.9	CLPP	+	ATG	25	ENST00000245816.9	ENST00000245816.9.1
1525	chr19:11356879-11356963:+	chr19	11356880	11356963	ENSG00000105520.10	PLPPR2	+	ATG	27	ENST00000251473.9	ENST00000251473.9.1
1526	chr19:17245469-17245544:-	chr19	17245470	17245544	ENSG00000160113.5	NR2F6	-	ATG	24	ENST00000291442.3	ENST00000291442.3.1
1527	chr19:18155599-18155623:+	chr19	18155600	18155623	ENSG00000105647.16	PIK3R2	+	ATG	7	ENST00000222254.12	ENST00000222254.12.2
1528	chr19:18155816-18155849:+	chr19	18155817	18155849	ENSG00000105647.16	PIK3R2	+	ATG	10	ENST00000222254.12	ENST00000222254.12.3
1529	chr19:18419576-18419612:+	chr19	18419577	18419612	ENSG00000130511.15	SSBP4	+	ATG	11	ENST00000348495.10	ENST00000348495.10.1
1530	chr19:34772938-34773073:-	chr19	34772939	34773073	ENSG00000153896.17	ZNF599	-	ATG	44	ENST00000329285.12	ENST00000329285.12.1
1531	chr19:35248565-35248868:+	chr19	35248566	35248868	ENSG00000105699.16	LSR	+	ATG	100	ENST00000602122.5	ENST00000602122.5.1
1532	chr19:36689412-36689439:+	chr19	36689413	36689439	ENSG00000189042.13	ZNF567	+	ATG	8	ENST00000536254.6	ENST00000536254.6.1
1533	chr19:36525202-36525301:-	chr19	36525203	36525301	ENSG00000254004.6	ZNF260	-	ATG	32	ENST00000523638.5	ENST00000523638.5.1
1534	chr19:36607613-36610665:+	chr19	36607614	36610665	ENSG00000161298.17	ZNF382	+	ATG	58	ENST00000292928.6	ENST00000292928.6.1
1535	chr19:37324921-37357996:+	chr19	37324922	37357996	ENSG00000181666.17	HKR1	+	ATG	90	ENST00000591471.5	ENST00000591471.5.1
1536	chr19:36235728-36235818:+	chr19	36235729	36235818	ENSG00000167635.11	ZNF146	+	ATG	29	ENST00000443387.2	ENST00000443387.2.3
1537	chr19:36115209-36115323:+	chr19	36115210	36115323	ENSG00000105254.11	TBCB	+	ATG	37	ENST00000221855.7	ENST00000221855.7.1
1538	chr19:40799195-40800370:+	chr19	40799196	40800370	ENSG00000269858.5	EGLN2	+	ATG	32	ENST00000303961.8	ENST00000303961.8.2
1539	chr19:40751110-40751140:+	chr19	40751111	40751140	ENSG00000077312.8	SNRPA	+	ATG	9	ENST00000243563.7	ENST00000243563.7.1
1540	chr19:42220296-42224285:+	chr19	42220297	42224285	ENSG00000167625.10	ZNF526	+	ATG	53	ENST00000301215.7	ENST00000301215.7.1
1541	chr19:43924248-43924408:-	chr19	43924249	43924408	ENSG00000124459.11	ZNF45	-	ATG	22	ENST00000269973.9	ENST00000269973.9.2
1542	chr19:44025436-44027063:+	chr19	44025437	44027063	ENSG00000159885.13	ZNF222	+	ATG	47	ENST00000187879.12	ENST00000187879.12.1
1543	chr19:45901688-45901811:-	chr19	45901689	45901811	ENSG00000176182.5	MYPOP	-	ATG	40	ENST00000322217.5	ENST00000322217.5.1
1544	chr19:48753004-48753347:-	chr19	48753005	48753347	ENSG00000174951.11	FUT1	-	ATG	46	ENST00000310160.7	ENST00000310160.7.1
1545	chr19:48753453-48753492:-	chr19	48753454	48753492	ENSG00000174951.11	FUT1	-	ATG	12	ENST00000310160.7	ENST00000310160.7.2
1546	chr19:48645935-48646025:-	chr19	48645936	48646025	ENSG00000063180.8	CA11	-	ATG	29	ENST00000084798.8	ENST00000084798.8.1
1547	chr19:46746068-46748085:+	chr19	46746069	46748085	ENSG00000181027.10	FKRP	+	ATG	26	ENST00000318584.9	ENST00000318584.9.1
1548	chr19:46755412-46755433:+	chr19	46755413	46755433	ENSG00000181027.10	FKRP	+	ATG	6	ENST00000318584.9	ENST00000318584.9.2
1549	chr19:49876982-49877072:-	chr19	49876983	49877072	ENSG00000204673.10	AKT1S1	-	ATG	29	ENST00000391835.1	ENST00000391835.1.3
1550	chr19:51974356-51974386:-	chr19	51974357	51974386	ENSG00000256683.6	ZNF350	-	ATG	9	ENST00000243644.8	ENST00000243644.8.1
1551	chr19:52025741-52025813:-	chr19	52025742	52025813	ENSG00000142556.18	ZNF614	-	ATG	23	ENST00000356322.10	ENST00000356322.10.2
1552	chr19:49813142-49813163:-	chr19	49813143	49813163	ENSG00000010361.13	FUZ	-	ATG	6	ENST00000313777.8	ENST00000313777.8.1
1553	chr19:50020614-50025399:-	chr19	50020615	50025399	ENSG00000105053.10	VRK3	-	ATG	28	ENST00000599538.5	ENST00000599538.5.1
1554	chr19:55280063-55280253:-	chr19	55280064	55280253	ENSG00000133265.10	HSPBP1	-	ATG	26	ENST00000255631.9	ENST00000255631.9.1
1555	chr19:55648946-55649054:+	chr19	55648947	55649054	ENSG00000173581.7	CCDC106	+	ATG	35	ENST00000592996.5	ENST00000592996.5.1
1556	chr19:57819912-57856116:+	chr19	57819913	57856116	ENSG00000268750.6	CTD-2583A14.10	+	ATG	32	ENST00000596498.2	ENST00000596498.2.1
1557	chr19:57819912-57839032:+	chr19	57819913	57839032	ENSG00000269343.6	ZNF587B	+	ATG	32	ENST00000594328.1	ENST00000594328.1.1
1558	chr19:58129468-58154871:-	chr19	58129469	58154871	ENSG00000181894.14	ZNF329	-	ATG	59	ENST00000601887.1	ENST00000601887.1.1
1559	chr19:58229567-58230432:+	chr19	58229568	58230432	ENSG00000198131.13	ZNF544	+	ATG	13	ENST00000595981.5	ENST00000595981.5.1
1560	chr20:349248-349290:+	chr20	349249	349290	ENSG00000125841.12	NRSN2	+	ATG	13	ENST00000608467.5	ENST00000608467.5.1
1561	chr20:24992684-24992834:-	chr20	24992685	24992834	ENSG00000101474.11	APMAP	-	ATG	49	ENST00000217456.2	ENST00000217456.2.1
1562	chr20:37519330-37527808:-	chr20	37519331	37527808	ENSG00000166619.12	BLCAP	-	ATG	11	ENST00000373537.6	ENST00000373537.6.1
1563	chr20:50115855-50115936:-	chr20	50115856	50115936	ENSG00000244687.11	UBE2V1	-	ATG	26	ENST00000371677.7	ENST00000371677.7.1
1564	chr21:15730120-15730153:+	chr21	15730121	15730153	ENSG00000155313.15	USP25	+	ATG	10	ENST00000285681.6	ENST00000285681.6.1
1565	chr21:33324990-33325029:+	chr21	33324991	33325029	ENSG00000142166.12	IFNAR1	+	ATG	12	ENST00000270139.7	ENST00000270139.7.1
1566	chr21:29024631-29027897:+	chr21	29024632	29027897	ENSG00000156256.14	USP16	+	ATG	56	ENST00000399976.6	ENST00000399976.6.1
1567	chr21:31276877-31339289:-	chr21	31276878	31339289	ENSG00000156299.13	TIAM1	-	ATG	25	ENST00000286827.7	ENST00000286827.7.1
1568	chr21:39313580-39313616:-	chr21	39313581	39313616	ENSG00000185658.13	BRWD1	-	ATG	11	ENST00000333229.6	ENST00000333229.6.1
1569	chr21:42010291-42010345:-	chr21	42010292	42010345	ENSG00000173276.13	ZBTB21	-	ATG	17	ENST00000310826.9	ENST00000310826.9.1
1570	chr21:42502330-42518408:+	chr21	42502331	42518408	ENSG00000160190.13	SLC37A1	+	ATG	72	ENST00000398341.7	ENST00000398341.7.1
1571	chr21:46323278-46323362:-	chr21	46323279	46323362	ENSG00000160298.17	C21orf58	-	ATG	27	ENST00000291691.11	ENST00000291691.11.2
1572	chr22:20982294-20982444:+	chr22	20982295	20982444	ENSG00000099949.19	LZTR1	+	ATG	49	ENST00000215739.12	ENST00000215739.12.1
1573	chr22:19432177-19432288:+	chr22	19432178	19432288	ENSG00000185608.8	MRPL40	+	ATG	36	ENST00000333130.3	ENST00000333130.3.1
1574	chr22:21945945-21946059:-	chr22	21945946	21946059	ENSG00000100034.13	PPM1F	-	ATG	37	ENST00000263212.9	ENST00000263212.9.1
1575	chr22:27801182-27801218:-	chr22	27801183	27801218	ENSG00000169184.5	MN1	-	ATG	11	ENST00000302326.4	ENST00000302326.4.1
1576	chr22:31754870-31754903:+	chr22	31754871	31754903	ENSG00000100150.17	DEPDC5	+	ATG	10	ENST00000642696.1	ENST00000642696.1.1
1577	chr22:37566186-37566228:+	chr22	37566187	37566228	ENSG00000128283.6	CDC42EP1	+	ATG	13	ENST00000249014.4	ENST00000249014.4.1
1578	chr22:41833136-41833163:+	chr22	41833137	41833163	ENSG00000198911.11	SREBF2	+	ATG	8	ENST00000361204.8	ENST00000361204.8.2
1579	chrX:10158460-10158490:+	chrX	10158461	10158490	ENSG00000073464.11	CLCN4	+	ATG	9	ENST00000380833.8	ENST00000380833.8.1
1580	chrX:13689127-13703850:+	chrX	13689128	13703850	ENSG00000123595.7	RAB9A	+	ATG	65	ENST00000464506.1	ENST00000464506.1.2
1581	chrX:24024878-24024899:-	chrX	24024879	24024899	ENSG00000174010.9	KLHL15	-	ATG	6	ENST00000328046.8	ENST00000328046.8.1
1582	chrX:55146232-55161176:-	chrX	55146233	55161176	ENSG00000182518.13	FAM104B	-	ATG	72	ENST00000358460.8	ENST00000358460.8.1
1583	chrX:47145446-47147425:+	chrX	47145447	47147425	ENSG00000182872.15	RBM10	+	ATG	35	ENST00000377604.7	ENST00000377604.7.1
1584	chrX:47218339-47218372:+	chrX	47218340	47218372	ENSG00000102225.15	CDK16	+	ATG	10	ENST00000457458.6	ENST00000457458.6.2
1585	chrX:70133722-70133848:+	chrX	70133723	70133848	ENSG00000089289.15	IGBP1	+	ATG	41	ENST00000342206.10	ENST00000342206.10.1
1586	chrX:68829156-68829222:+	chrX	68829157	68829222	ENSG00000090776.5	EFNB1	+	ATG	21	ENST00000204961.4	ENST00000204961.4.1
1587	chrX:80809619-80809643:-	chrX	80809620	80809643	ENSG00000165288.10	BRWD3	-	ATG	7	ENST00000373275.4	ENST00000373275.4.1
1588	chrX:119565223-119565355:-	chrX	119565224	119565355	ENSG00000018610.14	CXorf56	-	ATG	43	ENST00000320339.8	ENST00000320339.8.1
1589	chrX:129841979-129842060:-	chrX	129841980	129842060	ENSG00000188706.12	ZDHHC9	-	ATG	26	ENST00000357166.10	ENST00000357166.10.1
1590	chrX:134796810-134796933:-	chrX	134796811	134796933	ENSG00000156504.16	FAM122B	-	ATG	40	ENST00000370790.5	ENST00000370790.5.1
1591	chrX:153971557-153971590:-	chrX	153971558	153971590	ENSG00000172534.13	HCFC1	-	ATG	10	ENST00000310441.11	ENST00000310441.11.2
1592	chr1:67685114-67685381:+	chr1	67685115	67685381	ENSG00000116717.11	GADD45A	+	ATG	88	ENST00000370986.8	ENST00000370986.8.1
1593	chr10:100987566-100987617:+	chr10	100987567	100987617	ENSG00000107815.8	TWNK	+	ATG	16	ENST00000370228.2	ENST00000370228.2.2
1594	chr13:29553791-29595679:-	chr13	29553792	29595679	ENSG00000139514.12	SLC7A1	-	ATG	110	ENST00000380752.9	ENST00000380752.9.1
1595	chr1:38859473-38859800:-	chr1	38859474	38859800	ENSG00000116954.7	RRAGC	-	ATG	108	ENST00000373001.3	ENST00000373001.3.1
1596	chr5:135033972-135034029:-	chr5	135033973	135034029	ENSG00000069011.15	PITX1	-	ATG	18	ENST00000265340.11	ENST00000265340.11.1
1597	chr5:150778569-150795434:+	chr5	150778570	150795434	ENSG00000256235.1	SMIM3	+	ATG	135	ENST00000526627.1	ENST00000526627.1.1
1598	chr7:157139041-157139263:+	chr7	157139042	157139263	ENSG00000009335.17	UBE3C	+	ATG	73	ENST00000348165.9	ENST00000348165.9.1
1599	chr10:77637644-77637725:-	chr10	77637645	77637725	ENSG00000156113.22	KCNMA1	-	ATG	26	ENST00000639913.1	ENST00000639913.1.1
1600	chr14:103057231-103057387:-	chr14	103057232	103057387	ENSG00000198752.10	CDC42BPB	-	ATG	51	ENST00000361246.6	ENST00000361246.6.1
1601	chr16:83807952-83808090:+	chr16	83807953	83808090	ENSG00000230989.6	HSBP1	+	ATG	45	ENST00000433866.6	ENST00000433866.6.1
1602	chr17:4940111-4940141:+	chr17	4940112	4940141	ENSG00000108523.15	RNF167	+	ATG	9	ENST00000571816.5	ENST00000571816.5.1
1603	chr1:227318173-227318266:-	chr1	227318174	227318266	ENSG00000143776.18	CDC42BPA	-	ATG	30	ENST00000366769.7	ENST00000366769.7.4
1604	chr2:74958632-74958818:+	chr2	74958633	74958818	ENSG00000115350.11	POLE4	+	ATG	61	ENST00000483063.1	ENST00000483063.1.1
1605	chr3:57756321-57756583:+	chr3	57756322	57756583	ENSG00000163681.14	SLMAP	+	ATG	18	ENST00000295951.7	ENST00000295951.7.2
1606	chr4:54064502-54064532:-	chr4	54064503	54064532	ENSG00000109220.10	CHIC2	-	ATG	9	ENST00000263921.7	ENST00000263921.7.2
1607	chr5:160415296-160419053:-	chr5	160415297	160419053	ENSG00000164609.9	SLU7	-	ATG	14	ENST00000297151.8	ENST00000297151.8.1
1608	chr7:23246715-23246832:+	chr7	23246716	23246832	ENSG00000136235.15	GPNMB	+	ATG	38	ENST00000258733.8	ENST00000258733.8.1
1609	chr7:101321466-101321709:-	chr7	101321467	101321709	ENSG00000128581.15	IFT22	-	ATG	23	ENST00000517481.5	ENST00000517481.5.1
1610	chr8:89984613-89984649:-	chr8	89984614	89984649	ENSG00000104320.13	NBN	-	ATG	11	ENST00000265433.7	ENST00000265433.7.1
1611	chr9:93451735-93451780:+	chr9	93451736	93451780	ENSG00000048828.16	FAM120A	+	ATG	14	ENST00000277165.10	ENST00000277165.10.1
1612	chr10:91923922-91924042:+	chr10	91923923	91924042	ENSG00000095564.13	BTAF1	+	ATG	39	ENST00000265990.10	ENST00000265990.10.1
1613	chr10:118754789-118755218:-	chr10	118754790	118755218	ENSG00000151893.14	CACUL1	-	ATG	142	ENST00000369151.7	ENST00000369151.7.1
1614	chr11:126268739-126268958:-	chr11	126268740	126268958	ENSG00000182934.11	SRPRA	-	ATG	72	ENST00000332118.10	ENST00000332118.10.1
1615	chr12:123973623-123973992:+	chr12	123973624	123973992	ENSG00000179195.15	ZNF664	+	ATG	122	ENST00000539644.5	ENST00000539644.5.3
1616	chr13:72782191-72782233:+	chr13	72782192	72782233	ENSG00000083535.15	PIBF1	+	ATG	13	ENST00000326291.10	ENST00000326291.10.1
1617	chr14:52730245-52730341:+	chr14	52730246	52730341	ENSG00000198252.11	STYX	+	ATG	31	ENST00000354586.4	ENST00000354586.4.1
1618	chr17:42017385-42017481:-	chr17	42017386	42017481	ENSG00000168259.14	DNAJC7	-	ATG	31	ENST00000457167.8	ENST00000457167.8.1
1619	chr18:8609719-8609902:+	chr18	8609720	8609902	ENSG00000206418.3	RAB12	+	ATG	60	ENST00000329286.6	ENST00000329286.6.1
1620	chr19:48165573-48170328:-	chr19	48165574	48170328	ENSG00000105486.13	LIG1	-	ATG	45	ENST00000263274.11	ENST00000263274.11.1
1621	chr22:23095422-23095476:+	chr22	23095423	23095476	ENSG00000128266.8	GNAZ	+	ATG	17	ENST00000615612.1	ENST00000615612.1.1
1622	chrX:153972573-153982066:+	chrX	153972574	153982066	ENSG00000177854.7	TMEM187	+	ATG	167	ENST00000369982.4	ENST00000369982.4.1
1623	chr1:1087506-1092020:-	chr1	1087507	1092020	ENSG00000131591.17	C1orf159	-	ATG	96	ENST00000421241.6	ENST00000421241.6.1
1624	chr1:15210513-15215025:+	chr1	15210514	15215025	ENSG00000171729.13	TMEM51	+	ATG	59	ENST00000376014.7	ENST00000376014.7.1
1625	chr1:27558733-27558883:-	chr1	27558734	27558883	ENSG00000126705.14	AHDC1	-	ATG	49	ENST00000247087.10	ENST00000247087.10.1
1626	chr1:27914631-27914715:-	chr1	27914632	27914715	ENSG00000117748.9	RPA2	-	ATG	27	ENST00000373912.7	ENST00000373912.7.1
1627	chr1:37689876-37690398:-	chr1	37689877	37690398	ENSG00000116922.14	C1orf109	-	ATG	23	ENST00000358011.8	ENST00000358011.8.1
1628	chr1:45012157-45012229:+	chr1	45012158	45012229	ENSG00000126088.13	UROD	+	ATG	23	ENST00000246337.8	ENST00000246337.8.1
1629	chr1:52552946-52553096:-	chr1	52552947	52553096	ENSG00000134744.13	ZCCHC11	-	ATG	49	ENST00000371544.7	ENST00000371544.7.1
1630	chr1:89579591-89579654:+	chr1	89579592	89579654	ENSG00000197147.13	LRRC8B	+	ATG	20	ENST00000640258.1	ENST00000640258.1.1
1631	chr1:108885308-108885374:+	chr1	108885309	108885374	ENSG00000121957.13	GPSM2	+	ATG	21	ENST00000406462.6	ENST00000406462.6.2
1632	chr1:113073269-113073425:+	chr1	113073270	113073425	ENSG00000198799.11	LRIG2	+	ATG	51	ENST00000361127.5	ENST00000361127.5.2
1633	chr1:117367787-117367895:+	chr1	117367788	117367895	ENSG00000198162.12	MAN1A2	+	ATG	35	ENST00000356554.7	ENST00000356554.7.2
1634	chr1:149936676-149936790:-	chr1	149936677	149936790	ENSG00000014914.20	MTMR11	-	ATG	37	ENST00000439741.3	ENST00000439741.3.1
1635	chr1:154974745-154974829:+	chr1	154974746	154974829	ENSG00000173207.12	CKS1B	+	ATG	27	ENST00000368439.5	ENST00000368439.5.1
1636	chr1:154983875-154983896:+	chr1	154983876	154983896	ENSG00000160688.18	FLAD1	+	ATG	6	ENST00000315144.14	ENST00000315144.14.1
1637	chr1:153967922-153968048:+	chr1	153967923	153968048	ENSG00000143578.15	CREB3L4	+	ATG	41	ENST00000368607.7	ENST00000368607.7.1
1638	chr1:157045224-157045353:-	chr1	157045225	157045353	ENSG00000132694.18	ARHGEF11	-	ATG	42	ENST00000368194.7	ENST00000368194.7.1
1639	chr1:156738552-156741189:-	chr1	156738553	156741189	ENSG00000143314.12	MRPL24	-	ATG	73	ENST00000434558.5	ENST00000434558.5.1
1640	chr1:169367714-169367780:-	chr1	169367715	169367780	ENSG00000143156.13	NME7	-	ATG	21	ENST00000367811.7	ENST00000367811.7.1
1641	chr1:173825082-173825142:+	chr1	173825083	173825142	ENSG00000117593.9	DARS2	+	ATG	19	ENST00000361951.4	ENST00000361951.4.1
1642	chr1:179955103-179990520:+	chr1	179955104	179990520	ENSG00000135837.15	CEP350	+	ATG	61	ENST00000367607.7	ENST00000367607.7.2
1643	chr1:180632119-180632269:+	chr1	180632120	180632269	ENSG00000143324.13	XPR1	+	ATG	49	ENST00000367590.8	ENST00000367590.8.1
1644	chr1:185311280-185316985:-	chr1	185311281	185316985	ENSG00000116679.15	IVNS1ABP	-	ATG	24	ENST00000367498.7	ENST00000367498.7.1
1645	chr1:204213902-204214037:-	chr1	204213903	204214037	ENSG00000174567.7	GOLT1A	-	ATG	44	ENST00000308302.3	ENST00000308302.3.1
1646	chr1:223292641-223364073:-	chr1	223292642	223364073	ENSG00000143502.14	SUSD4	-	ATG	69	ENST00000494793.6	ENST00000494793.6.1
1647	chr1:222579849-222588563:-	chr1	222579850	222588563	ENSG00000143498.17	TAF1A	-	ATG	47	ENST00000366890.5	ENST00000366890.5.1
1648	chr1:246566183-246566222:-	chr1	246566184	246566222	ENSG00000162851.7	TFB2M	-	ATG	12	ENST00000366514.4	ENST00000366514.4.1
1649	chr2:9418665-9418710:-	chr2	9418666	9418710	ENSG00000119185.12	ITGB1BP1	-	ATG	14	ENST00000360635.7	ENST00000360635.7.1
1650	chr2:10303006-10303060:+	chr2	10303007	10303060	ENSG00000115756.12	HPCAL1	+	ATG	17	ENST00000307845.7	ENST00000307845.7.1
1651	chr2:25982383-25982422:-	chr2	25982384	25982422	ENSG00000084731.14	KIF3C	-	ATG	12	ENST00000264712.7	ENST00000264712.7.1
1652	chr2:27086785-27086863:+	chr2	27086786	27086863	ENSG00000138030.12	KHK	+	ATG	25	ENST00000260599.10	ENST00000260599.10.1
1653	chr2:27661295-27662199:-	chr2	27661296	27662199	ENSG00000119760.15	SUPT7L	-	ATG	37	ENST00000337768.9	ENST00000337768.9.1
1654	chr2:46542735-46542987:+	chr2	46542736	46542987	ENSG00000119729.11	RHOQ	+	ATG	83	ENST00000238738.8	ENST00000238738.8.1
1655	chr2:47170751-47176541:-	chr2	47170752	47176541	ENSG00000143933.16	CALM2	-	ATG	37	ENST00000272298.11	ENST00000272298.11.1
1656	chr2:63841113-63841158:+	chr2	63841114	63841158	ENSG00000169764.15	UGP2	+	ATG	14	ENST00000394417.6	ENST00000394417.6.1
1657	chr2:55617350-55617419:-	chr2	55617351	55617419	ENSG00000275052.4	PPP4R3B	-	ATG	22	ENST00000611717.4	ENST00000611717.4.1
1658	chr2:86623121-86623169:-	chr2	86623122	86623169	ENSG00000239305.6	RNF103	-	ATG	15	ENST00000237455.4	ENST00000237455.4.1
1659	chr2:105855056-105881487:+	chr2	105855057	105881487	ENSG00000071051.13	NCK2	+	ATG	130	ENST00000233154.8	ENST00000233154.8.1
1660	chr2:105816434-105816530:+	chr2	105816435	105816530	ENSG00000071051.13	NCK2	+	ATG	31	ENST00000233154.8	ENST00000233154.8.2
1661	chr2:120223292-120223388:-	chr2	120223293	120223388	ENSG00000226479.3	TMEM185B	-	ATG	31	ENST00000426077.2	ENST00000426077.2.1
1662	chr2:121605925-121606051:-	chr2	121605926	121606051	ENSG00000074054.18	CLASP1	-	ATG	41	ENST00000409078.7	ENST00000409078.7.1
1663	chr2:127526329-127526437:-	chr2	127526330	127526437	ENSG00000163166.14	IWS1	-	ATG	35	ENST00000295321.8	ENST00000295321.8.1
1664	chr2:157818422-157874894:-	chr2	157818423	157874894	ENSG00000115170.13	ACVR1	-	ATG	55	ENST00000263640.7	ENST00000263640.7.1
1665	chr2:156435522-156435606:+	chr2	156435523	156435606	ENSG00000115159.15	GPD2	+	ATG	27	ENST00000310454.10	ENST00000310454.10.1
1666	chr2:165295815-165297026:+	chr2	165295816	165297026	ENSG00000136531.15	SCN2A	+	ATG	94	ENST00000636071.2	ENST00000636071.2.1
1667	chr2:173965178-173965412:-	chr2	173965179	173965412	ENSG00000172845.14	SP3	-	ATG	77	ENST00000310015.10	ENST00000310015.10.1
1668	chr2:202911713-202911788:-	chr2	202911714	202911788	ENSG00000138442.9	WDR12	-	ATG	24	ENST00000261015.4	ENST00000261015.4.2
1669	chr2:203016182-203016209:+	chr2	203016183	203016209	ENSG00000144426.18	NBEAL1	+	ATG	8	ENST00000449802.5	ENST00000449802.5.2
1670	chr2:216371335-216371599:-	chr2	216371336	216371599	ENSG00000144583.4	MARCH4	-	ATG	87	ENST00000273067.4	ENST00000273067.4.1
1671	chr2:219279388-219279817:+	chr2	219279389	219279817	ENSG00000135924.15	DNAJB2	+	ATG	49	ENST00000336576.9	ENST00000336576.9.1
1672	chr3:9428830-9428911:+	chr3	9428831	9428911	ENSG00000168137.15	SETD5	+	ATG	26	ENST00000406341.5	ENST00000406341.5.1
1673	chr3:12557068-12568928:+	chr3	12557069	12568928	ENSG00000075975.15	MKRN2	+	ATG	53	ENST00000170447.11	ENST00000170447.11.1
1674	chr3:9950136-9952384:-	chr3	9950137	9952384	ENSG00000163704.11	PRRT3	-	ATG	32	ENST00000412055.5	ENST00000412055.5.1
1675	chr3:15099105-15099132:-	chr3	15099106	15099132	ENSG00000131381.12	RBSN	-	ATG	8	ENST00000253699.7	ENST00000253699.7.2
1676	chr3:40457311-40457350:+	chr3	40457312	40457350	ENSG00000188846.13	RPL14	+	ATG	12	ENST00000338970.10	ENST00000338970.10.1
1677	chr3:31981780-31988768:+	chr3	31981781	31988768	ENSG00000197385.5	ZNF860	+	ATG	76	ENST00000360311.4	ENST00000360311.4.1
1678	chr3:52198673-52198826:+	chr3	52198674	52198826	ENSG00000023330.14	ALAS1	+	ATG	50	ENST00000394965.6	ENST00000394965.6.1
1679	chr3:55487080-55487338:-	chr3	55487081	55487338	ENSG00000114251.14	WNT5A	-	ATG	85	ENST00000474267.5	ENST00000474267.5.1
1680	chr3:52770685-52770946:-	chr3	52770686	52770946	ENSG00000114904.12	NEK4	-	ATG	86	ENST00000233027.9	ENST00000233027.9.1
1681	chr3:100401645-100401672:+	chr3	100401646	100401672	ENSG00000206535.7	LNP1	+	ATG	8	ENST00000383693.7	ENST00000383693.7.2
1682	chr3:100492769-100492874:+	chr3	100492770	100492874	ENSG00000181458.10	TMEM45A	+	ATG	34	ENST00000323523.8	ENST00000323523.8.1
1683	chr3:101782156-101782231:+	chr3	101782157	101782231	ENSG00000144815.15	NXPE3	+	ATG	24	ENST00000491511.6	ENST00000491511.6.1
1684	chr3:113216211-113249796:+	chr3	113216212	113249796	ENSG00000144857.14	BOC	+	ATG	45	ENST00000495514.5	ENST00000495514.5.1
1685	chr3:114389060-114389105:-	chr3	114389061	114389105	ENSG00000181722.16	ZBTB20	-	ATG	14	ENST00000357258.8	ENST00000357258.8.1
1686	chr3:112561596-112561629:-	chr3	112561597	112561629	ENSG00000144848.10	ATG3	-	ATG	10	ENST00000283290.9	ENST00000283290.9.1
1687	chr3:120244342-120285033:-	chr3	120244343	120285033	ENSG00000175697.10	GPR156	-	ATG	46	ENST00000464295.5	ENST00000464295.5.1
1688	chr3:170172708-170181738:-	chr3	170172709	170181738	ENSG00000173889.15	PHC3	-	ATG	68	ENST00000495893.6	ENST00000495893.6.1
1689	chr3:172750791-172750824:+	chr3	172750792	172750824	ENSG00000114346.13	ECT2	+	ATG	10	ENST00000232458.9	ENST00000232458.9.2
1690	chr3:185282998-185285532:+	chr3	185282999	185285532	ENSG00000073803.13	MAP3K13	+	ATG	14	ENST00000446828.5	ENST00000446828.5.1
1691	chr4:26860716-26860944:+	chr4	26860717	26860944	ENSG00000109689.15	STIM2	+	ATG	75	ENST00000467087.5	ENST00000467087.5.1
1692	chr4:40750607-40750655:+	chr4	40750608	40750655	ENSG00000179299.16	NSUN7	+	ATG	15	ENST00000381782.6	ENST00000381782.6.1
1693	chr4:54229374-54229401:+	chr4	54229375	54229401	ENSG00000134853.11	PDGFRA	+	ATG	8	ENST00000257290.9	ENST00000257290.9.1
1694	chr4:54229228-54229288:+	chr4	54229229	54229288	ENSG00000134853.11	PDGFRA	+	ATG	19	ENST00000257290.9	ENST00000257290.9.2
1695	chr4:55510005-55546898:-	chr4	55510006	55546898	ENSG00000134852.14	CLOCK	-	ATG	58	ENST00000513440.5	ENST00000513440.5.2
1696	chr4:78057966-78237562:+	chr4	78057967	78237562	ENSG00000138759.18	FRAS1	+	ATG	67	ENST00000512123.3	ENST00000512123.3.1
1697	chr4:147617441-147617471:+	chr4	147617442	147617471	ENSG00000164168.7	TMEM184C	+	ATG	9	ENST00000508208.5	ENST00000508208.5.3
1698	chr4:170089686-170089710:-	chr4	170089687	170089710	ENSG00000109576.13	AADAT	-	ATG	7	ENST00000515480.5	ENST00000515480.5.1
1699	chr5:6713618-6713690:+	chr5	6713619	6713690	ENSG00000112941.13	PAPD7	+	ATG	23	ENST00000230859.7	ENST00000230859.7.1
1700	chr5:52800237-52800285:+	chr5	52800238	52800285	ENSG00000152684.10	PELO	+	ATG	15	ENST00000274311.2	ENST00000274311.2.1
1701	chr5:73562977-73565270:-	chr5	73562978	73565270	ENSG00000164331.9	ANKRA2	-	ATG	48	ENST00000296785.7	ENST00000296785.7.1
1702	chr5:87412777-87412846:-	chr5	87412778	87412846	ENSG00000134480.14	CCNH	-	ATG	22	ENST00000256897.8	ENST00000256897.8.1
1703	chr5:102866054-102866099:+	chr5	102866055	102866099	ENSG00000145730.20	PAM	+	ATG	14	ENST00000438793.7	ENST00000438793.7.2
1704	chr5:136153602-136153722:+	chr5	136153603	136153722	ENSG00000113658.17	SMAD5	+	ATG	39	ENST00000545279.5	ENST00000545279.5.2
1705	chr5:140827986-140828016:+	chr5	140827987	140828016	ENSG00000081842.17	PCDHA6	+	ATG	9	ENST00000529310.5	ENST00000529310.5.1
1706	chr5:141970731-141970848:+	chr5	141970732	141970848	ENSG00000013561.17	RNF14	+	ATG	38	ENST00000394520.6	ENST00000394520.6.2
1707	chr5:141637646-141637895:+	chr5	141637647	141637895	ENSG00000164620.8	RELL2	+	ATG	82	ENST00000297164.7	ENST00000297164.7.2
1708	chr5:159268904-159268937:+	chr5	159268905	159268937	ENSG00000164332.7	UBLCP1	+	ATG	10	ENST00000296786.7	ENST00000296786.7.1
1709	chr5:169583793-169583817:+	chr5	169583794	169583817	ENSG00000040275.16	SPDL1	+	ATG	7	ENST00000265295.8	ENST00000265295.8.1
1710	chr5:178113768-178119577:+	chr5	178113769	178119577	ENSG00000145911.5	RP11-889L3.3	+	ATG	8	ENST00000274605.5	ENST00000274605.5.1
1711	chr6:13974242-13976930:+	chr6	13974243	13976930	ENSG00000180537.12	RNF182	+	ATG	47	ENST00000488300.5	ENST00000488300.5.1
1712	chr6:26224904-26224937:+	chr6	26224905	26224937	ENSG00000274750.2	HIST1H3E	+	ATG	10	ENST00000634733.1	ENST00000634733.1.1
1713	chr6:26402284-26402365:+	chr6	26402285	26402365	ENSG00000026950.16	BTN3A1	+	ATG	26	ENST00000289361.10	ENST00000289361.10.1
1714	chr6:36874864-36874996:-	chr6	36874865	36874996	ENSG00000137168.7	PPIL1	-	ATG	43	ENST00000373699.5	ENST00000373699.5.1
1715	chr6:108260901-108261225:-	chr6	108260902	108261225	ENSG00000112335.14	SNX3	-	ATG	107	ENST00000230085.12	ENST00000230085.12.1
1716	chr6:135490726-135492275:-	chr6	135490727	135492275	ENSG00000135541.20	AHI1	-	ATG	22	ENST00000367800.8	ENST00000367800.8.1
1717	chr6:136289741-136289801:-	chr6	136289742	136289801	ENSG00000029363.16	BCLAF1	-	ATG	19	ENST00000531224.5	ENST00000531224.5.1
1718	chr6:142783547-142836971:-	chr6	142783548	142836971	ENSG00000010818.9	HIVEP2	-	ATG	34	ENST00000367604.6	ENST00000367604.6.1
1719	chr6:154733422-154733554:+	chr6	154733423	154733554	ENSG00000213079.9	SCAF8	+	ATG	43	ENST00000367178.7	ENST00000367178.7.1
1720	chr7:1709170-1709245:+	chr7	1709171	1709245	ENSG00000225968.7	ELFN1	+	ATG	24	ENST00000424383.4	ENST00000424383.4.1
1721	chr7:2232872-2232935:-	chr7	2232873	2232935	ENSG00000002822.15	MAD1L1	-	ATG	20	ENST00000406869.5	ENST00000406869.5.1
1722	chr7:2958516-3043893:-	chr7	2958517	3043893	ENSG00000198286.9	CARD11	-	ATG	113	ENST00000396946.8	ENST00000396946.8.1
1723	chr7:25179332-25180180:-	chr7	25179333	25180180	ENSG00000153790.11	C7orf31	-	ATG	36	ENST00000409280.5	ENST00000409280.5.1
1724	chr7:73829308-73829530:+	chr7	73829309	73829530	ENSG00000189143.9	CLDN4	+	ATG	73	ENST00000435050.1	ENST00000435050.1.1
1725	chr7:66921339-66921384:+	chr7	66921340	66921384	ENSG00000106609.16	TMEM248	+	ATG	14	ENST00000341567.8	ENST00000341567.8.1
1726	chr7:91940881-91940941:+	chr7	91940882	91940941	ENSG00000127914.16	AKAP9	+	ATG	19	ENST00000356239.7	ENST00000356239.7.1
1727	chr7:76404471-76409592:-	chr7	76404472	76409592	ENSG00000146700.8	SSC4D	-	ATG	70	ENST00000275560.3	ENST00000275560.3.1
1728	chr7:76409525-76409624:-	chr7	76409526	76409624	ENSG00000146700.8	SSC4D	-	ATG	32	ENST00000275560.3	ENST00000275560.3.2
1729	chr7:100478098-100478170:-	chr7	100478099	100478170	ENSG00000166925.8	TSC22D4	-	ATG	23	ENST00000300181.6	ENST00000300181.6.2
1730	chr7:101816020-101816077:+	chr7	101816021	101816077	ENSG00000257923.10	CUX1	+	ATG	18	ENST00000437600.9	ENST00000437600.9.1
1731	chr7:128476765-128479161:+	chr7	128476766	128479161	ENSG00000165055.15	METTL2B	+	ATG	37	ENST00000480046.5	ENST00000480046.5.1
1732	chr7:134316805-134316850:-	chr7	134316806	134316850	ENSG00000205060.10	SLC35B4	-	ATG	14	ENST00000378509.8	ENST00000378509.8.1
1733	chr7:152660748-152676132:-	chr7	152660749	152676132	ENSG00000196584.2	XRCC2	-	ATG	41	ENST00000359321.1	ENST00000359321.1.1
1734	chr8:33461509-33461599:-	chr8	33461510	33461599	ENSG00000172728.15	FUT10	-	ATG	29	ENST00000327671.9	ENST00000327671.9.2
1735	chr8:42472540-42472615:-	chr8	42472541	42472615	ENSG00000168575.9	SLC20A2	-	ATG	24	ENST00000342228.7	ENST00000342228.7.1
1736	chr8:38468283-38468310:-	chr8	38468284	38468310	ENSG00000077782.19	FGFR1	-	ATG	8	ENST00000397091.9	ENST00000397091.9.2
1737	chr8:41599015-41599084:+	chr8	41599016	41599084	ENSG00000158669.11	AGPAT6	+	ATG	22	ENST00000396987.7	ENST00000396987.7.3
1738	chr8:42271370-42272088:+	chr8	42271371	42272088	ENSG00000104365.13	IKBKB	+	ATG	34	ENST00000520810.5	ENST00000520810.5.1
1739	chr8:56212779-56212815:+	chr8	56212780	56212815	ENSG00000170791.17	CHCHD7	+	ATG	11	ENST00000523975.5	ENST00000523975.5.1
1740	chr8:103300009-103300102:+	chr8	103300010	103300102	ENSG00000164930.11	FZD6	+	ATG	30	ENST00000522566.5	ENST00000522566.5.1
1741	chr8:123267351-123274265:-	chr8	123267352	123274265	ENSG00000259305.6	ZHX1-C8orf76	-	ATG	27	ENST00000622816.2	ENST00000622816.2.2
1742	chr8:143247195-143247291:+	chr8	143247196	143247291	ENSG00000264668.1	RP13-582O9.6	+	ATG	31	ENST00000522452.1	ENST00000522452.1.1
1743	chr9:6757788-6757845:+	chr9	6757789	6757845	ENSG00000107077.18	KDM4C	+	ATG	18	ENST00000381309.7	ENST00000381309.7.1
1744	chr9:12775020-12775101:+	chr9	12775021	12775101	ENSG00000153714.5	LURAP1L	+	ATG	26	ENST00000319264.3	ENST00000319264.3.2
1745	chr9:35546445-35546529:+	chr9	35546446	35546529	ENSG00000198853.11	RUSC2	+	ATG	27	ENST00000361226.7	ENST00000361226.7.1
1746	chr9:70259007-70264305:+	chr9	70259008	70264305	ENSG00000198887.8	SMC5	+	ATG	85	ENST00000361138.6	ENST00000361138.6.1
1747	chr9:71768394-71768460:-	chr9	71768395	71768460	ENSG00000135048.13	TMEM2	-	ATG	21	ENST00000377044.8	ENST00000377044.8.1
1748	chr9:78236102-78236177:+	chr9	78236103	78236177	ENSG00000148019.13	CEP78	+	ATG	24	ENST00000424347.6	ENST00000424347.6.1
1749	chr9:92289378-92293461:-	chr9	92289379	92293461	ENSG00000196305.17	IARS	-	ATG	22	ENST00000375643.7	ENST00000375643.7.1
1750	chr9:122270866-122270998:+	chr9	122270867	122270998	ENSG00000148187.17	MRRF	+	ATG	43	ENST00000344641.7	ENST00000344641.7.2
1751	chr9:128683719-128691223:+	chr9	128683720	128691223	ENSG00000119335.16	SET	+	ATG	113	ENST00000372692.8	ENST00000372692.8.1
1752	chr9:128818475-128818565:+	chr9	128818476	128818565	ENSG00000167136.6	ENDOG	+	ATG	29	ENST00000372642.4	ENST00000372642.4.1
1753	chr9:134026304-134026505:+	chr9	134026305	134026505	ENSG00000235106.9	RP11-374P20.5	+	ATG	66	ENST00000603928.2	ENST00000603928.2.3
1754	chr10:26860838-26860880:-	chr10	26860839	26860880	ENSG00000136754.17	ABI1	-	ATG	13	ENST00000376138.7	ENST00000376138.7.1
1755	chr10:37838001-37856474:-	chr10	37838002	37856474	ENSG00000198105.13	ZNF248	-	ATG	63	ENST00000615949.6	ENST00000615949.6.1
1756	chr10:44959831-44970171:+	chr10	44959832	44970171	ENSG00000107551.20	RASSF4	+	ATG	13	ENST00000340258.9	ENST00000340258.9.1
1757	chr10:32305872-32378647:-	chr10	32305873	32378647	ENSG00000120616.15	EPC1	-	ATG	71	ENST00000375110.6	ENST00000375110.6.1
1758	chr10:58269074-58269185:+	chr10	58269075	58269185	ENSG00000122873.11	CISD1	+	ATG	36	ENST00000333926.5	ENST00000333926.5.1
1759	chr10:87096939-87151455:+	chr10	87096940	87151455	ENSG00000122376.11	FAM35A	+	ATG	51	ENST00000298786.4	ENST00000298786.4.1
1760	chr10:86364017-86366414:-	chr10	86364018	86366414	ENSG00000182771.18	GRID1	-	ATG	59	ENST00000327946.11	ENST00000327946.11.1
1761	chr10:113853776-113853818:-	chr10	113853777	113853818	ENSG00000198924.7	DCLRE1A	-	ATG	13	ENST00000369305.1	ENST00000369305.1.1
1762	chr11:28097933-28108069:-	chr11	28097934	28108069	ENSG00000121621.6	KIF18A	-	ATG	21	ENST00000263181.6	ENST00000263181.6.1
1763	chr11:47214993-47215017:+	chr11	47214994	47215017	ENSG00000134574.11	DDB2	+	ATG	7	ENST00000256996.8	ENST00000256996.8.1
1764	chr11:59142881-59143275:+	chr11	59142882	59143275	ENSG00000166801.15	FAM111A	+	ATG	85	ENST00000528737.5	ENST00000528737.5.1
1765	chr11:57753519-57791389:+	chr11	57753520	57791389	ENSG00000198561.13	CTNND1	+	ATG	48	ENST00000524630.5	ENST00000524630.5.1
1766	chr11:61333248-61334700:+	chr11	61333249	61334700	ENSG00000149476.15	TKFC	+	ATG	53	ENST00000394900.7	ENST00000394900.7.2
1767	chr11:61361819-61362095:-	chr11	61361820	61362095	ENSG00000162144.9	CYB561A3	-	ATG	91	ENST00000294072.8	ENST00000294072.8.3
1768	chr11:60913899-60914088:+	chr11	60913900	60914088	ENSG00000110108.9	TMEM109	+	ATG	62	ENST00000227525.7	ENST00000227525.7.1
1769	chr11:64305704-64307171:+	chr11	64305705	64307171	ENSG00000173153.13	ESRRA	+	ATG	11	ENST00000406310.5	ENST00000406310.5.1
1770	chr11:64317976-64318009:-	chr11	64317977	64318009	ENSG00000173113.6	TRMT112	-	ATG	10	ENST00000544844.5	ENST00000544844.5.1
1771	chr11:66288240-66289145:-	chr11	66288241	66289145	ENSG00000174851.15	YIF1A	-	ATG	80	ENST00000376901.8	ENST00000376901.8.1
1772	chr11:68030653-68032164:+	chr11	68030654	68032164	ENSG00000110717.12	NDUFS8	+	ATG	30	ENST00000313468.9	ENST00000313468.9.1
1773	chr11:106022143-106022182:-	chr11	106022144	106022182	ENSG00000170903.10	MSANTD4	-	ATG	12	ENST00000301919.8	ENST00000301919.8.1
1774	chr11:107565665-107565722:-	chr11	107565666	107565722	ENSG00000137760.14	ALKBH8	-	ATG	18	ENST00000428149.6	ENST00000428149.6.1
1775	chr11:111937376-111937409:+	chr11	111937377	111937409	ENSG00000150764.13	DIXDC1	+	ATG	10	ENST00000440460.6	ENST00000440460.6.1
1776	chr11:131370619-131370724:+	chr11	131370620	131370724	ENSG00000182667.14	NTM	+	ATG	34	ENST00000374791.7	ENST00000374791.7.1
1777	chr12:3697008-3733103:-	chr12	3697009	3733103	ENSG00000130038.9	EFCAB4B	-	ATG	89	ENST00000440314.6	ENST00000440314.6.1
1778	chr12:989953-990034:-	chr12	989954	990034	ENSG00000002016.17	RAD52	-	ATG	26	ENST00000430095.6	ENST00000430095.6.1
1779	chr12:2874477-2874504:-	chr12	2874478	2874504	ENSG00000111206.12	FOXM1	-	ATG	8	ENST00000361953.7	ENST00000361953.7.1
1780	chr12:10613518-10613599:-	chr12	10613519	10613599	ENSG00000111196.9	MAGOHB	-	ATG	26	ENST00000320756.6	ENST00000320756.6.1
1781	chr12:21501185-21501221:-	chr12	21501186	21501221	ENSG00000004700.15	RECQL	-	ATG	11	ENST00000444129.6	ENST00000444129.6.1
1782	chr12:39443085-39443109:-	chr12	39443086	39443109	ENSG00000139116.18	KIF21A	-	ATG	7	ENST00000361961.7	ENST00000361961.7.1
1783	chr12:6493497-6493617:+	chr12	6493498	6493617	ENSG00000010292.12	NCAPD2	+	ATG	39	ENST00000315579.9	ENST00000315579.9.1
1784	chr12:45729744-45729765:+	chr12	45729745	45729765	ENSG00000189079.15	ARID2	+	ATG	6	ENST00000334344.10	ENST00000334344.10.1
1785	chr12:49348788-49348869:+	chr12	49348789	49348869	ENSG00000178401.14	DNAJC22	+	ATG	26	ENST00000549441.6	ENST00000549441.6.2
1786	chr12:51246794-51270548:-	chr12	51246795	51270548	ENSG00000170545.16	SMAGP	-	ATG	133	ENST00000603798.5	ENST00000603798.5.1
1787	chr12:52949749-52949842:-	chr12	52949750	52949842	ENSG00000170421.12	KRT8	-	ATG	30	ENST00000552551.5	ENST00000552551.5.1
1788	chr12:53252110-53252845:+	chr12	53252111	53252845	ENSG00000182544.8	MFSD5	+	ATG	61	ENST00000329548.4	ENST00000329548.4.1
1789	chr12:56042015-56042063:+	chr12	56042016	56042063	ENSG00000197728.10	RPS26	+	ATG	15	ENST00000356464.10	ENST00000356464.10.3
1790	chr12:71686486-71686684:+	chr12	71686487	71686684	ENSG00000139291.13	TMEM19	+	ATG	65	ENST00000266673.9	ENST00000266673.9.3
1791	chr12:89524355-89524661:-	chr12	89524356	89524661	ENSG00000257594.3	GALNT4	-	ATG	101	ENST00000529983.2	ENST00000529983.2.1
1792	chr12:109469700-109477498:-	chr12	109469701	109477498	ENSG00000110906.12	KCTD10	-	ATG	88	ENST00000228495.10	ENST00000228495.10.1
1793	chr12:116737972-116737993:-	chr12	116737973	116737993	ENSG00000111412.5	C12orf49	-	ATG	6	ENST00000261318.4	ENST00000261318.4.1
1794	chr12:121804189-121804733:+	chr12	121804190	121804733	ENSG00000139718.10	SETD1B	+	ATG	17	ENST00000542440.5	ENST00000542440.5.1
1795	chr12:132828464-132828734:-	chr12	132828465	132828734	ENSG00000090615.14	GOLGA3	-	ATG	89	ENST00000456883.6	ENST00000456883.6.2
1796	chr13:25287295-25287598:-	chr13	25287296	25287598	ENSG00000139505.11	MTMR6	-	ATG	100	ENST00000381801.5	ENST00000381801.5.1
1797	chr13:27424543-27424780:+	chr13	27424544	27424780	ENSG00000122034.14	GTF3A	+	ATG	78	ENST00000381140.8	ENST00000381140.8.1
1798	chr13:36995540-36999307:-	chr13	36995541	36999307	ENSG00000120697.8	ALG5	-	ATG	42	ENST00000239891.3	ENST00000239891.3.1
1799	chr13:32586526-32648869:+	chr13	32586527	32648869	ENSG00000083642.18	PDS5B	+	ATG	60	ENST00000315596.14	ENST00000315596.14.1
1800	chr13:49433381-49434151:-	chr13	49433382	49434151	ENSG00000102547.18	CAB39L	-	ATG	25	ENST00000409308.5	ENST00000409308.5.1
1801	chr13:51791225-51804109:-	chr13	51791226	51804109	ENSG00000102796.10	DHRS12	-	ATG	73	ENST00000218981.5	ENST00000218981.5.1
1802	chr13:80337646-80337748:-	chr13	80337647	80337748	ENSG00000136158.11	SPRY2	-	ATG	33	ENST00000377104.3	ENST00000377104.3.1
1803	chr14:20684216-20693571:+	chr14	20684217	20693571	ENSG00000214274.9	ANG	+	ATG	188	ENST00000336811.10	ENST00000336811.10.1
1804	chr14:24430833-24430953:-	chr14	24430834	24430953	ENSG00000139899.10	CBLN3	-	ATG	39	ENST00000555436.1	ENST00000555436.1.1
1805	chr14:49620983-49621022:+	chr14	49620984	49621022	ENSG00000168282.5	MGAT2	+	ATG	12	ENST00000305386.3	ENST00000305386.3.2
1806	chr14:77105666-77105705:+	chr14	77105667	77105705	ENSG00000198894.7	CIPC	+	ATG	12	ENST00000361786.6	ENST00000361786.6.1
1807	chr14:103385545-103385662:+	chr14	103385546	103385662	ENSG00000075413.17	MARK3	+	ATG	38	ENST00000429436.6	ENST00000429436.6.1
1808	chr15:40323755-40323863:+	chr15	40323756	40323863	ENSG00000259330.2	INAFM2	+	ATG	35	ENST00000638170.1	ENST00000638170.1.1
1809	chr15:56917762-56918062:-	chr15	56917763	56918062	ENSG00000285253.1	RP11-566D24.2	-	ATG	99	ENST00000559000.6	ENST00000559000.6.2
1810	chr15:60479003-60479099:-	chr15	60479004	60479099	ENSG00000128915.11	ICE2	-	ATG	31	ENST00000261520.8	ENST00000261520.8.1
1811	chr15:65611464-65611605:+	chr15	65611465	65611605	ENSG00000074621.13	SLC24A1	+	ATG	46	ENST00000537259.5	ENST00000537259.5.1
1812	chr15:74956907-74957081:-	chr15	74956908	74957081	ENSG00000178718.6	RPP25	-	ATG	57	ENST00000322177.5	ENST00000322177.5.1
1813	chr15:79923576-79923735:-	chr15	79923577	79923735	ENSG00000259332.3	ST20-MTHFS	-	ATG	52	ENST00000479961.1	ENST00000479961.1.1
1814	chr15:90868703-90875750:+	chr15	90868704	90875750	ENSG00000140564.11	FURIN	+	ATG	58	ENST00000268171.7	ENST00000268171.7.2
1815	chr16:3609437-3609530:-	chr16	3609438	3609530	ENSG00000188827.10	SLX4	-	ATG	30	ENST00000294008.3	ENST00000294008.3.2
1816	chr16:30651024-30651111:+	chr16	30651025	30651111	ENSG00000156858.11	PRR14	+	ATG	28	ENST00000300835.8	ENST00000300835.8.1
1817	chr16:46884383-46884434:+	chr16	46884384	46884434	ENSG00000166123.13	GPT2	+	ATG	16	ENST00000340124.8	ENST00000340124.8.1
1818	chr16:67416269-67416335:-	chr16	67416270	67416335	ENSG00000159714.10	ZDHHC1	-	ATG	21	ENST00000348579.6	ENST00000348579.6.1
1819	chr16:67518572-67538469:+	chr16	67518573	67538469	ENSG00000039523.19	FAM65A	+	ATG	29	ENST00000562116.1	ENST00000562116.1.1
1820	chr16:70398884-70399052:-	chr16	70398885	70399052	ENSG00000157350.12	ST3GAL2	-	ATG	55	ENST00000393640.8	ENST00000393640.8.3
1821	chr16:72960131-73058643:-	chr16	72960132	73058643	ENSG00000140836.16	ZFHX3	-	ATG	58	ENST00000641206.2	ENST00000641206.2.1
1822	chr17:5419996-5420119:-	chr17	5419997	5420119	ENSG00000108559.11	NUP88	-	ATG	40	ENST00000573584.5	ENST00000573584.5.1
1823	chr17:6651781-6651835:+	chr17	6651782	6651835	ENSG00000256806.5	C17orf100	+	ATG	17	ENST00000542475.2	ENST00000542475.2.1
1824	chr17:19648909-19649098:+	chr17	19648910	19649098	ENSG00000072210.18	ALDH3A2	+	ATG	62	ENST00000176643.10	ENST00000176643.10.1
1825	chr17:28717319-28718267:-	chr17	28717320	28718267	ENSG00000109113.19	RAB34	-	ATG	83	ENST00000301043.10	ENST00000301043.10.1
1826	chr17:28902797-28902944:-	chr17	28902798	28902944	ENSG00000167536.13	DHRS13	-	ATG	48	ENST00000394901.7	ENST00000394901.7.1
1827	chr17:31094993-31095038:+	chr17	31094994	31095038	ENSG00000196712.17	NF1	+	ATG	14	ENST00000356175.7	ENST00000356175.7.1
1828	chr17:42730877-42745017:-	chr17	42730878	42745017	ENSG00000108799.12	EZH1	-	ATG	15	ENST00000415827.6	ENST00000415827.6.1
1829	chr17:42348526-42388559:-	chr17	42348527	42388559	ENSG00000168610.14	STAT3	-	ATG	97	ENST00000264657.9	ENST00000264657.9.1
1830	chr17:44216637-44221545:-	chr17	44216638	44221545	ENSG00000108312.14	UBTF	-	ATG	178	ENST00000302904.8	ENST00000302904.8.1
1831	chr17:59731441-59731486:+	chr17	59731442	59731486	ENSG00000062716.12	VMP1	+	ATG	14	ENST00000262291.8	ENST00000262291.8.1
1832	chr17:59155143-59155257:-	chr17	59155144	59155257	ENSG00000182628.12	SKA2	-	ATG	37	ENST00000330137.11	ENST00000330137.11.1
1833	chr17:60391887-60391950:-	chr17	60391888	60391950	ENSG00000170832.12	USP32	-	ATG	20	ENST00000300896.8	ENST00000300896.8.1
1834	chr17:64496980-64497001:-	chr17	64496981	64497001	ENSG00000256525.6	POLG2	-	ATG	6	ENST00000539111.6	ENST00000539111.6.1
1835	chr17:64661945-64662035:-	chr17	64661946	64662035	ENSG00000108854.15	SMURF2	-	ATG	29	ENST00000262435.13	ENST00000262435.13.1
1836	chr17:73088663-73092645:-	chr17	73088664	73092645	ENSG00000133195.11	SLC39A11	-	ATG	48	ENST00000255559.7	ENST00000255559.7.1
1837	chr17:80263576-80263621:+	chr17	80263577	80263621	ENSG00000173821.19	RNF213	+	ATG	14	ENST00000582970.5	ENST00000582970.5.1
1838	chr17:7251440-7251524:-	chr17	7251441	7251524	ENSG00000175826.11	CTDNEP1	-	ATG	27	ENST00000573600.5	ENST00000573600.5.1
1839	chr18:13730627-13730678:+	chr18	13730628	13730678	ENSG00000101654.17	RNMT	+	ATG	16	ENST00000383314.6	ENST00000383314.6.1
1840	chr18:21612288-21612318:+	chr18	21612289	21612318	ENSG00000167088.10	SNRPD1	+	ATG	9	ENST00000300413.9	ENST00000300413.9.1
1841	chr18:34493361-34493412:+	chr18	34493362	34493412	ENSG00000134769.21	DTNA	+	ATG	16	ENST00000596745.5	ENST00000596745.5.1
1842	chr18:75210938-75211181:+	chr18	75210939	75211181	ENSG00000179981.10	TSHZ1	+	ATG	80	ENST00000322038.5	ENST00000322038.5.1
1843	chr19:2737153-2737300:-	chr19	2737154	2737300	ENSG00000267001.1	AC006538.4	-	ATG	48	ENST00000586572.1	ENST00000586572.1.2
1844	chr19:4818331-4818478:-	chr19	4818332	4818478	ENSG00000127666.9	TICAM1	-	ATG	48	ENST00000248244.5	ENST00000248244.5.1
1845	chr19:12610921-12611047:+	chr19	12610922	12611047	ENSG00000173875.13	ZNF791	+	ATG	41	ENST00000446165.2	ENST00000446165.2.1
1846	chr19:13116704-13116725:-	chr19	13116705	13116725	ENSG00000104907.12	TRMT1	-	ATG	6	ENST00000592062.5	ENST00000592062.5.1
1847	chr19:43780881-43781151:-	chr19	43780882	43781151	ENSG00000104783.11	KCNN4	-	ATG	89	ENST00000262888.7	ENST00000262888.7.1
1848	chr19:43827441-43828267:+	chr19	43827442	43828267	ENSG00000167637.16	ZNF283	+	ATG	22	ENST00000618787.4	ENST00000618787.4.1
1849	chr19:45863090-45863225:-	chr19	45863091	45863225	ENSG00000125755.18	SYMPK	-	ATG	44	ENST00000245934.11	ENST00000245934.11.1
1850	chr19:48619443-48620427:+	chr19	48619444	48620427	ENSG00000063176.15	SPHK2	+	ATG	41	ENST00000245222.8	ENST00000245222.8.1
1851	chr19:48646236-48646275:-	chr19	48646237	48646275	ENSG00000063180.8	CA11	-	ATG	12	ENST00000084798.8	ENST00000084798.8.2
1852	chr19:52619052-52660824:-	chr19	52619053	52660824	ENSG00000167766.18	ZNF83	-	ATG	95	ENST00000601257.5	ENST00000601257.5.1
1853	chr19:55675401-55675425:+	chr19	55675402	55675425	ENSG00000063245.14	EPN1	+	ATG	7	ENST00000270460.10	ENST00000270460.10.1
1854	chr20:4801061-4823600:-	chr20	4801062	4823600	ENSG00000101265.15	RASSF2	-	ATG	39	ENST00000379400.7	ENST00000379400.7.2
1855	chr20:16526146-16573282:-	chr20	16526147	16573282	ENSG00000089177.18	KIF16B	-	ATG	60	ENST00000636835.1	ENST00000636835.1.1
1856	chr20:23350761-23354094:+	chr20	23350762	23354094	ENSG00000132661.3	NXT1	+	ATG	137	ENST00000254998.2	ENST00000254998.2.1
1857	chr20:34792472-34792514:-	chr20	34792473	34792514	ENSG00000198646.13	NCOA6	-	ATG	13	ENST00000359003.6	ENST00000359003.6.1
1858	chr20:32277680-32309720:+	chr20	32277681	32309720	ENSG00000101350.7	KIF3B	+	ATG	30	ENST00000375712.3	ENST00000375712.3.1
1859	chr20:35801512-35801542:+	chr20	35801513	35801542	ENSG00000025293.16	PHF20	+	ATG	9	ENST00000374012.7	ENST00000374012.7.1
1860	chr20:37365247-37365271:+	chr20	37365248	37365271	ENSG00000197122.11	SRC	+	ATG	7	ENST00000373578.6	ENST00000373578.6.1
1861	chr20:41269043-41269076:-	chr20	41269044	41269076	ENSG00000174306.21	ZHX3	-	ATG	10	ENST00000559234.5	ENST00000559234.5.1
1862	chr20:44589837-44589861:+	chr20	44589838	44589861	ENSG00000168734.13	PKIG	+	ATG	7	ENST00000372887.5	ENST00000372887.5.1
1863	chr20:45363229-45363271:+	chr20	45363230	45363271	ENSG00000204070.9	SYS1	+	ATG	13	ENST00000426004.5	ENST00000426004.5.1
1864	chr20:53582970-53583036:-	chr20	53582971	53583036	ENSG00000171940.13	ZNF217	-	ATG	21	ENST00000371471.6	ENST00000371471.6.1
1865	chr21:36057197-36058888:-	chr21	36057198	36058888	ENSG00000185917.13	SETD4	-	ATG	57	ENST00000399201.5	ENST00000399201.5.1
1866	chr22:20117118-20117376:-	chr22	20117119	20117376	ENSG00000099899.14	TRMT2A	-	ATG	85	ENST00000403707.7	ENST00000403707.7.1
1867	chr22:25360096-25360183:-	chr22	25360097	25360183	ENSG00000100068.11	LRP5L	-	ATG	28	ENST00000444995.7	ENST00000444995.7.1
1868	chr22:41301577-41301661:+	chr22	41301578	41301661	ENSG00000100403.11	ZC3H7B	+	ATG	27	ENST00000352645.4	ENST00000352645.4.1
1869	chr22:44702270-44702381:+	chr22	44702271	44702381	ENSG00000248405.10	PRR5-ARHGAP8	+	ATG	36	ENST00000361473.9	ENST00000361473.9.1
1870	chr22:50474910-50475012:-	chr22	50474911	50475012	ENSG00000100241.20	SBF1	-	ATG	33	ENST00000380817.7	ENST00000380817.7.1
1871	chr22:50508249-50508276:+	chr22	50508250	50508276	ENSG00000025770.18	NCAPH2	+	ATG	8	ENST00000420993.6	ENST00000420993.6.1
1872	chrX:48696762-48698992:+	chrX	48696763	48698992	ENSG00000101945.16	SUV39H1	+	ATG	43	ENST00000376687.3	ENST00000376687.3.1
1873	chrX:52369056-52369119:+	chrX	52369057	52369119	ENSG00000155622.6	XAGE2	+	ATG	20	ENST00000286049.2	ENST00000286049.2.1
1874	chrX:48476177-48476318:+	chrX	48476178	48476318	ENSG00000068438.14	FTSJ1	+	ATG	46	ENST00000348411.2	ENST00000348411.2.2
1875	chrX:78138920-78139631:-	chrX	78138921	78139631	ENSG00000187325.4	TAF9B	-	ATG	24	ENST00000341864.5	ENST00000341864.5.1
1876	chrX:153971731-153971788:-	chrX	153971732	153971788	ENSG00000172534.13	HCFC1	-	ATG	18	ENST00000310441.11	ENST00000310441.11.3
1877	chr1:154405344-154405410:+	chr1	154405345	154405410	ENSG00000160712.12	IL6R	+	ATG	21	ENST00000368485.7	ENST00000368485.7.1
1878	chr2:231463308-231464585:-	chr2	231463309	231464585	ENSG00000115053.15	NCL	-	ATG	85	ENST00000322723.8	ENST00000322723.8.1
1879	chr3:47513573-47513702:-	chr3	47513574	47513702	ENSG00000163832.15	ELP6	-	ATG	42	ENST00000296149.8	ENST00000296149.8.1
1880	chr4:145098284-145098362:+	chr4	145098285	145098362	ENSG00000164163.10	ABCE1	+	ATG	25	ENST00000296577.8	ENST00000296577.8.1
1881	chr5:36225563-36225620:-	chr5	36225564	36225620	ENSG00000152620.12	NADK2	-	ATG	18	ENST00000397338.5	ENST00000397338.5.1
1882	chr5:177351520-177351703:-	chr5	177351521	177351703	ENSG00000169223.14	LMAN2	-	ATG	60	ENST00000303127.11	ENST00000303127.11.2
1883	chr6:46652572-46652761:-	chr6	46652573	46652761	ENSG00000146233.7	CYP39A1	-	ATG	62	ENST00000275016.2	ENST00000275016.2.1
1884	chr6:166999258-167000064:+	chr6	166999259	167000064	ENSG00000213066.12	FGFR1OP	+	ATG	86	ENST00000366847.8	ENST00000366847.8.1
1885	chr7:6578663-6580647:+	chr7	6578664	6580647	ENSG00000136247.14	ZDHHC4	+	ATG	49	ENST00000396706.2	ENST00000396706.2.2
1886	chr7:50565304-50565358:-	chr7	50565305	50565358	ENSG00000132437.17	DDC	-	ATG	17	ENST00000444124.6	ENST00000444124.6.1
1887	chr14:95534986-95543953:+	chr14	95534987	95543953	ENSG00000182512.4	GLRX5	+	ATG	134	ENST00000331334.4	ENST00000331334.4.1
1888	chr15:34969746-34969830:-	chr15	34969747	34969830	ENSG00000021776.10	AQR	-	ATG	27	ENST00000156471.9	ENST00000156471.9.1
1889	chr16:84101898-84101973:-	chr16	84101899	84101973	ENSG00000140943.16	MBTPS1	-	ATG	24	ENST00000343411.7	ENST00000343411.7.4
1890	chr19:929279-929321:+	chr19	929280	929321	ENSG00000116017.10	ARID3A	+	ATG	13	ENST00000263620.7	ENST00000263620.7.1
1891	chr19:10565026-10566030:-	chr19	10565027	10566030	ENSG00000129347.19	KRI1	-	ATG	68	ENST00000312962.10	ENST00000312962.10.1
1892	chr20:35742131-35742260:-	chr20	35742132	35742260	ENSG00000131051.22	RBM39	-	ATG	42	ENST00000361162.10	ENST00000361162.10.1
1893	chr21:14968518-15014422:-	chr21	14968519	15014422	ENSG00000180530.10	NRIP1	-	ATG	28	ENST00000400202.5	ENST00000400202.5.1
1894	chr22:18149904-18157584:+	chr22	18149905	18157584	ENSG00000184979.9	USP18	+	ATG	114	ENST00000215794.7	ENST00000215794.7.1
1895	chr5:82277824-82278483:-	chr5	82277825	82278483	ENSG00000186468.12	RPS23	-	ATG	63	ENST00000296674.12	ENST00000296674.12.1
1896	chr8:19313628-19313790:+	chr8	19313629	19313790	ENSG00000104611.11	SH2D4A	+	ATG	53	ENST00000265807.7	ENST00000265807.7.1
1897	chr8:70608258-70608336:-	chr8	70608259	70608336	ENSG00000067167.7	TRAM1	-	ATG	25	ENST00000262213.6	ENST00000262213.6.1
1898	chr10:90871973-90872027:+	chr10	90871974	90872027	ENSG00000148688.13	RPP30	+	ATG	17	ENST00000371703.7	ENST00000371703.7.1
1899	chr11:75563727-75566413:+	chr11	75563728	75566413	ENSG00000149257.13	SERPINH1	+	ATG	46	ENST00000533603.5	ENST00000533603.5.1
1900	chr12:113185700-113185823:+	chr12	113185701	113185823	ENSG00000139405.15	RITA1	+	ATG	40	ENST00000548278.1	ENST00000548278.1.4
1901	chr16:47132016-47143971:-	chr16	47132017	47143971	ENSG00000171208.9	NETO2	-	ATG	133	ENST00000562435.5	ENST00000562435.5.2
1902	chr16:88803674-88804775:+	chr16	88803675	88804775	ENSG00000167513.8	CDT1	+	ATG	173	ENST00000301019.8	ENST00000301019.8.1
1903	chr3:62319752-62319827:+	chr3	62319753	62319827	ENSG00000114405.10	C3orf14	+	ATG	24	ENST00000494481.5	ENST00000494481.5.1
1904	chr9:12775114-12775216:+	chr9	12775115	12775216	ENSG00000153714.5	LURAP1L	+	ATG	33	ENST00000319264.3	ENST00000319264.3.3
1905	chr19:11435437-11436071:+	chr19	11435438	11436071	ENSG00000130175.9	PRKCSH	+	ATG	32	ENST00000591462.5	ENST00000591462.5.1
1906	chrX:151601549-151604709:+	chrX	151601550	151604709	ENSG00000166049.10	PASD1	+	ATG	31	ENST00000370357.4	ENST00000370357.4.1
1907	chr1:156194133-156200131:+	chr1	156194134	156200131	ENSG00000160785.13	SLC25A44	+	ATG	136	ENST00000359511.4	ENST00000359511.4.2
1908	chr2:157443884-157443986:-	chr2	157443885	157443986	ENSG00000115165.9	CYTIP	-	ATG	33	ENST00000439355.5	ENST00000439355.5.1
1909	chr4:61201682-61201724:+	chr4	61201683	61201724	ENSG00000150471.16	ADGRL3	+	ATG	13	ENST00000512091.6	ENST00000512091.6.1
1910	chr16:3397471-3397627:-	chr16	3397472	3397627	ENSG00000140987.19	ZSCAN32	-	ATG	51	ENST00000396852.8	ENST00000396852.8.1
1911	chr16:18801485-18801623:-	chr16	18801486	18801623	ENSG00000170540.14	ARL6IP1	-	ATG	45	ENST00000304414.11	ENST00000304414.11.1
1912	chr16:28489348-28491764:-	chr16	28489349	28491764	ENSG00000188603.19	CLN3	-	ATG	55	ENST00000569430.6	ENST00000569430.6.2
1913	chr19:579562-579601:+	chr19	579563	579601	ENSG00000172270.19	BSG	+	ATG	12	ENST00000545507.6	ENST00000545507.6.1
1914	chr1:45660664-45660745:-	chr1	45660665	45660745	ENSG00000159592.10	GPBP1L1	-	ATG	26	ENST00000290795.7	ENST00000290795.7.2
1915	chr1:244451726-244451903:-	chr1	244451727	244451903	ENSG00000035687.9	ADSS	-	ATG	58	ENST00000366535.3	ENST00000366535.3.1
1916	chr3:185285537-185285564:+	chr3	185285538	185285564	ENSG00000073803.13	MAP3K13	+	ATG	8	ENST00000446828.5	ENST00000446828.5.2
1917	chr5:65554878-65561511:-	chr5	65554879	65561511	ENSG00000123219.12	CENPK	-	ATG	38	ENST00000396679.5	ENST00000396679.5.1
1918	chr6:132814561-132814991:+	chr6	132814562	132814991	ENSG00000112306.7	RPS12	+	ATG	40	ENST00000230050.3	ENST00000230050.3.2
1919	chr7:124898354-124928937:-	chr7	124898355	124928937	ENSG00000128513.14	POT1	-	ATG	71	ENST00000357628.7	ENST00000357628.7.1
1920	chr7:130204087-130205421:-	chr7	130204088	130205421	ENSG00000146842.16	TMEM209	-	ATG	23	ENST00000397622.6	ENST00000397622.6.1
1921	chr10:84139504-84141585:+	chr10	84139505	84141585	ENSG00000165678.20	GHITM	+	ATG	70	ENST00000372134.5	ENST00000372134.5.1
1922	chr11:70203251-70206151:+	chr11	70203252	70206151	ENSG00000168040.4	FADD	+	ATG	170	ENST00000301838.4	ENST00000301838.4.1
1923	chr16:31202478-31202979:-	chr16	31202479	31202979	ENSG00000103490.13	PYCARD	-	ATG	166	ENST00000247470.9	ENST00000247470.9.1
1924	chr19:36139982-36141025:+	chr19	36139983	36141025	ENSG00000126247.10	CAPNS1	+	ATG	67	ENST00000246533.7	ENST00000246533.7.1
1925	chr3:52270714-52270780:-	chr3	52270715	52270780	ENSG00000164091.11	WDR82	-	ATG	21	ENST00000463624.1	ENST00000463624.1.1
1926	chr6:10406821-10419490:-	chr6	10406822	10419490	ENSG00000137203.11	TFAP2A	-	ATG	176	ENST00000319516.8	ENST00000319516.8.1
1927	chr7:56051681-56051861:+	chr7	56051682	56051861	ENSG00000146731.10	CCT6A	+	ATG	59	ENST00000275603.8	ENST00000275603.8.1
1928	chr11:73234128-73234188:+	chr11	73234129	73234188	ENSG00000175591.11	P2RY2	+	ATG	19	ENST00000311131.6	ENST00000311131.6.1
1929	chr12:7093735-7109194:-	chr12	7093736	7109194	ENSG00000139178.10	C1RL	-	ATG	138	ENST00000545280.5	ENST00000545280.5.1
1930	chr19:6590122-6603965:-	chr19	6590123	6603965	ENSG00000125726.10	CD70	-	ATG	137	ENST00000597430.2	ENST00000597430.2.1
1931	chr19:10379647-10379767:-	chr19	10379648	10379767	ENSG00000105397.13	TYK2	-	ATG	39	ENST00000525621.5	ENST00000525621.5.1
1932	chr19:36236068-36236134:+	chr19	36236069	36236134	ENSG00000167635.11	ZNF146	+	ATG	21	ENST00000443387.2	ENST00000443387.2.4

## Sheet: Experiment_specific_annotation
	ORF_id_gen	chromosome	start	stop	gene_id	gene_symbol	strand	start_codon	ORF_length	transcript_id	uORFids
0	chr1:24415814-24419407:+	chr1	24415815	24419407	ENSG00000001461.16	NIPAL3	+	ATG	68	ENST00000003912.7	ENST00000003912.7.1
1	chr1:114716156-114716849:-	chr1	114716157	114716849	ENSG00000213281.4	NRAS	-	ATG	70	ENST00000369535.4	ENST00000369535.4.1
2	chr2:96208543-96208630:-	chr2	96208544	96208630	ENSG00000084090.13	STARD7	-	ATG	28	ENST00000337288.9	ENST00000337288.9.1
3	chr2:241268523-241315791:-	chr2	241268524	241315791	ENSG00000115677.16	HDLBP	-	ATG	79	ENST00000310931.8	ENST00000310931.8.1
4	chr3:132660317-132660422:+	chr3	132660318	132660422	ENSG00000081307.12	UBA5	+	ATG	34	ENST00000356232.8	ENST00000356232.8.1
5	chr6:24720331-24720439:-	chr6	24720332	24720439	ENSG00000112308.12	C6orf62	-	ATG	35	ENST00000378119.8	ENST00000378119.8.1
6	chr6:34425214-34426078:-	chr6	34425215	34426078	ENSG00000124614.14	RPS10	-	ATG	17	ENST00000326199.12	ENST00000326199.12.1
7	chr6:63572680-63576531:+	chr6	63572681	63576531	ENSG00000112245.10	PTP4A1	+	ATG	44	ENST00000370651.5	ENST00000370651.5.1
8	chr7:27179748-27179910:-	chr7	27179749	27179910	ENSG00000257184.3	HOXA10-HOXA9	-	ATG	53	ENST00000470747.4	ENST00000470747.4.1
9	chr8:144509076-144509445:+	chr8	144509077	144509445	ENSG00000167700.8	MFSD3	+	ATG	122	ENST00000301327.4	ENST00000301327.4.1
10	chr10:95693685-95694015:-	chr10	95693686	95694015	ENSG00000119977.20	TCTN3	-	ATG	109	ENST00000265993.13	ENST00000265993.13.1
11	chr11:112025173-112025509:+	chr11	112025174	112025509	ENSG00000150768.15	DLAT	+	ATG	111	ENST00000280346.10	ENST00000280346.10.1
12	chr12:2885284-2885512:+	chr12	2885285	2885512	ENSG00000171792.10	RHNO1	+	ATG	75	ENST00000489288.6	ENST00000489288.6.1
13	chr12:92145756-92145828:-	chr12	92145757	92145828	ENSG00000133639.4	BTG1	-	ATG	23	ENST00000256015.4	ENST00000256015.4.1
14	chr14:103334575-103335924:+	chr14	103334576	103335924	ENSG00000100664.10	EIF5	+	ATG	97	ENST00000216554.7	ENST00000216554.7.1
15	chr15:41096325-41116280:-	chr15	41096326	41116280	ENSG00000128908.15	INO80	-	ATG	111	ENST00000361937.7	ENST00000361937.7.1
16	chr16:19523960-19524023:+	chr16	19523961	19524023	ENSG00000103540.16	CCP110	+	ATG	20	ENST00000396212.6	ENST00000396212.6.1
17	chr18:65751093-65809714:+	chr18	65751094	65809714	ENSG00000081138.13	CDH7	+	ATG	157	ENST00000397968.3	ENST00000397968.3.1
18	chr19:32959971-32971914:-	chr19	32959972	32971914	ENSG00000121289.17	CEP89	-	ATG	90	ENST00000305768.9	ENST00000305768.9.1
19	chr19:37169899-37169965:-	chr19	37169900	37169965	ENSG00000196967.10	ZNF585A	-	ATG	21	ENST00000292841.9	ENST00000292841.9.1
20	chr19:40742432-40744683:-	chr19	40742433	40744683	ENSG00000188493.14	C19orf54	-	ATG	179	ENST00000470681.5	ENST00000470681.5.1
21	chr19:49929395-49930906:+	chr19	49929396	49930906	ENSG00000169136.10	ATF5	+	ATG	59	ENST00000423777.6	ENST00000423777.6.1
22	chrX:47218426-47218471:+	chrX	47218427	47218471	ENSG00000102225.15	CDK16	+	ATG	14	ENST00000457458.6	ENST00000457458.6.1
23	chr1:1375164-1375296:-	chr1	1375165	1375296	ENSG00000175756.13	AURKAIP1	-	ATG	43	ENST00000338338.9	ENST00000338338.9.1
24	chr1:9942630-9942735:-	chr1	9942631	9942735	ENSG00000162441.11	LZIC	-	ATG	34	ENST00000377223.5	ENST00000377223.5.1
25	chr1:36397811-36397868:-	chr1	36397812	36397868	ENSG00000181817.5	LSM10	-	ATG	18	ENST00000315732.2	ENST00000315732.2.1
26	chr1:53838275-53838407:-	chr1	53838276	53838407	ENSG00000058804.11	NDC1	-	ATG	43	ENST00000371429.3	ENST00000371429.3.1
27	chr1:53889352-53889463:-	chr1	53889353	53889463	ENSG00000058799.14	YIPF1	-	ATG	36	ENST00000072644.6	ENST00000072644.6.1
28	chr1:52055508-52055691:-	chr1	52055509	52055691	ENSG00000117862.11	TXNDC12	-	ATG	60	ENST00000371626.8	ENST00000371626.8.1
29	chr1:93180446-93180557:-	chr1	93180447	93180557	ENSG00000117500.12	TMED5	-	ATG	36	ENST00000370282.7	ENST00000370282.7.1
30	chr1:156194123-156194192:+	chr1	156194124	156194192	ENSG00000160785.13	SLC25A44	+	ATG	22	ENST00000359511.4	ENST00000359511.4.1
31	chr1:158076215-158078060:+	chr1	158076216	158078060	ENSG00000183853.17	KIRREL	+	ATG	38	ENST00000360089.8	ENST00000360089.8.1
32	chr1:156728642-156728873:+	chr1	156728643	156728873	ENSG00000143303.11	RRNAD1	+	ATG	76	ENST00000368218.8	ENST00000368218.8.1
33	chr1:165827833-165885147:+	chr1	165827834	165885147	ENSG00000143179.15	UCK2	+	ATG	34	ENST00000642653.1	ENST00000642653.1.1
34	chr1:168178961-168179081:+	chr1	168178962	168179081	ENSG00000143155.12	TIPRL	+	ATG	39	ENST00000367833.6	ENST00000367833.6.1
35	chr1:172442690-172442729:-	chr1	172442691	172442729	ENSG00000135845.9	PIGC	-	ATG	12	ENST00000367728.1	ENST00000367728.1.1
36	chr1:173811305-173823975:-	chr1	173811306	173823975	ENSG00000120334.15	CENPL	-	ATG	16	ENST00000356198.6	ENST00000356198.6.1
37	chr1:179852705-179852780:-	chr1	179852706	179852780	ENSG00000169905.12	TOR1AIP2	-	ATG	24	ENST00000367612.7	ENST00000367612.7.1
38	chr1:204411486-204411642:-	chr1	204411487	204411642	ENSG00000158615.8	PPP1R15B	-	ATG	51	ENST00000367188.4	ENST00000367188.4.1
39	chr1:204411663-204411690:-	chr1	204411664	204411690	ENSG00000158615.8	PPP1R15B	-	ATG	8	ENST00000367188.4	ENST00000367188.4.2
40	chr1:227563694-227650975:+	chr1	227563695	227650975	ENSG00000181450.17	ZNF678	+	ATG	89	ENST00000608949.5	ENST00000608949.5.1
41	chr1:233327785-233327887:+	chr1	233327786	233327887	ENSG00000143674.10	RP5-862P8.2	+	ATG	33	ENST00000366624.7	ENST00000366624.7.1
42	chr1:235328581-235328719:+	chr1	235328582	235328719	ENSG00000152904.11	GGPS1	+	ATG	45	ENST00000282841.9	ENST00000282841.9.1
43	chr1:231241225-231241339:+	chr1	231241226	231241339	ENSG00000116906.12	GNPAT	+	ATG	37	ENST00000366647.8	ENST00000366647.8.1
44	chr1:241848840-241848906:+	chr1	241848841	241848906	ENSG00000174371.16	EXO1	+	ATG	21	ENST00000366548.7	ENST00000366548.7.1
45	chr1:240091945-240092071:+	chr1	240091946	240092071	ENSG00000155816.19	FMN2	+	ATG	41	ENST00000319653.13	ENST00000319653.13.1
46	chr1:236795320-236803436:+	chr1	236795321	236803436	ENSG00000116984.12	MTR	+	ATG	141	ENST00000366577.9	ENST00000366577.9.1
47	chr1:244835527-244835566:+	chr1	244835528	244835566	ENSG00000203667.9	COX20	+	ATG	12	ENST00000411948.6	ENST00000411948.6.1
48	chr2:9423673-9423721:+	chr2	9423674	9423721	ENSG00000119203.13	CPSF3	+	ATG	15	ENST00000238112.7	ENST00000238112.7.1
49	chr2:27134485-27134578:-	chr2	27134486	27134578	ENSG00000138073.13	PREB	-	ATG	30	ENST00000260643.6	ENST00000260643.6.1
50	chr2:37316836-37316893:-	chr2	37316837	37316893	ENSG00000115825.9	PRKD3	-	ATG	18	ENST00000379066.5	ENST00000379066.5.1
51	chr2:44169013-44169133:+	chr2	44169014	44169133	ENSG00000138032.20	PPM1B	+	ATG	39	ENST00000378551.6	ENST00000378551.6.1
52	chr2:44168902-44168929:+	chr2	44168903	44168929	ENSG00000138032.20	PPM1B	+	ATG	8	ENST00000378551.6	ENST00000378551.6.2
53	chr2:55419163-55419202:-	chr2	55419164	55419202	ENSG00000115355.16	CCDC88A	-	ATG	12	ENST00000263630.13	ENST00000263630.13.1
54	chr2:113756463-113756490:-	chr2	113756464	113756490	ENSG00000115084.13	SLC35F5	-	ATG	8	ENST00000245680.6	ENST00000245680.6.1
55	chr2:112646592-112646670:+	chr2	112646593	112646670	ENSG00000144136.10	SLC20A1	+	ATG	25	ENST00000272542.7	ENST00000272542.7.1
56	chr2:175118339-175136443:-	chr2	175118340	175136443	ENSG00000115966.16	ATF2	-	ATG	43	ENST00000345739.9	ENST00000345739.9.1
57	chr2:189661520-189666111:+	chr2	189661521	189666111	ENSG00000138381.9	ASNSD1	+	ATG	96	ENST00000260952.8	ENST00000260952.8.1
58	chr2:191013637-191013661:-	chr2	191013638	191013661	ENSG00000115415.18	STAT1	-	ATG	7	ENST00000361099.7	ENST00000361099.7.1
59	chr2:218737595-218737664:+	chr2	218737596	218737664	ENSG00000135912.10	TTLL4	+	ATG	22	ENST00000392102.5	ENST00000392102.5.1
60	chr2:219245896-219245980:+	chr2	219245897	219245980	ENSG00000115661.13	STK16	+	ATG	27	ENST00000409638.7	ENST00000409638.7.1
61	chr2:241315603-241315645:-	chr2	241315604	241315645	ENSG00000115677.16	HDLBP	-	ATG	13	ENST00000310931.8	ENST00000310931.8.2
62	chr3:12663905-12663959:-	chr3	12663906	12663959	ENSG00000132155.11	RAF1	-	ATG	17	ENST00000251849.8	ENST00000251849.8.1
63	chr3:15096710-15098157:-	chr3	15096711	15098157	ENSG00000131381.12	RBSN	-	ATG	12	ENST00000253699.7	ENST00000253699.7.1
64	chr3:28348696-28348783:-	chr3	28348697	28348783	ENSG00000163512.13	AZI2	-	ATG	28	ENST00000479665.5	ENST00000479665.5.1
65	chr3:47805344-47805419:+	chr3	47805345	47805419	ENSG00000132153.14	DHX30	+	ATG	24	ENST00000445061.5	ENST00000445061.5.1
66	chr3:50613894-50617683:+	chr3	50613895	50617683	ENSG00000114738.10	MAPKAPK3	+	ATG	97	ENST00000446044.5	ENST00000446044.5.1
67	chr3:88058138-88058216:-	chr3	88058139	88058216	ENSG00000163320.10	CGGBP1	-	ATG	25	ENST00000462901.5	ENST00000462901.5.1
68	chr3:94063014-94064501:+	chr3	94063015	94064501	ENSG00000178694.9	NSUN3	+	ATG	62	ENST00000314622.8	ENST00000314622.8.1
69	chr3:99817948-99817978:+	chr3	99817949	99817978	ENSG00000184220.11	CMSS1	+	ATG	9	ENST00000421999.7	ENST00000421999.7.1
70	chr3:119498631-119498691:+	chr3	119498632	119498691	ENSG00000113845.9	TIMMDC1	+	ATG	19	ENST00000494664.5	ENST00000494664.5.1
71	chr3:152269025-152269076:+	chr3	152269026	152269076	ENSG00000152601.17	MBNL1	+	ATG	16	ENST00000355460.6	ENST00000355460.6.1
72	chr3:186570661-186570862:+	chr3	186570662	186570862	ENSG00000090520.11	DNAJB11	+	ATG	66	ENST00000439351.5	ENST00000439351.5.1
73	chr3:196503548-196503614:-	chr3	196503549	196503614	ENSG00000163961.4	RNF168	-	ATG	21	ENST00000318037.3	ENST00000318037.3.1
74	chr4:39366298-39366319:-	chr4	39366299	39366319	ENSG00000035928.15	RFC1	-	ATG	6	ENST00000381897.5	ENST00000381897.5.1
75	chr4:39527314-39527500:-	chr4	39527315	39527500	ENSG00000109814.11	UGDH	-	ATG	61	ENST00000316423.10	ENST00000316423.10.1
76	chr4:41990503-41990632:+	chr4	41990504	41990632	ENSG00000014824.13	SLC30A9	+	ATG	42	ENST00000264451.11	ENST00000264451.11.1
77	chr4:75630141-75630276:-	chr4	75630142	75630276	ENSG00000138769.10	CDKL2	-	ATG	44	ENST00000429927.6	ENST00000429927.6.1
78	chr4:82900166-82900435:-	chr4	82900167	82900435	ENSG00000138674.16	SEC31A	-	ATG	52	ENST00000355196.6	ENST00000355196.6.1
79	chr4:104491977-104492040:-	chr4	104491978	104492040	ENSG00000168772.10	CXXC4	-	ATG	20	ENST00000394767.2	ENST00000394767.2.1
80	chr4:145180009-145180147:-	chr4	145180010	145180147	ENSG00000164164.16	OTUD4	-	ATG	45	ENST00000447906.7	ENST00000447906.7.1
81	chr4:155667205-155696947:+	chr4	155667206	155696947	ENSG00000164116.16	GUCY1A3	+	ATG	33	ENST00000393832.7	ENST00000393832.7.1
82	chr4:183099457-183099499:+	chr4	183099458	183099499	ENSG00000151718.15	WWC2	+	ATG	13	ENST00000403733.7	ENST00000403733.7.1
83	chr5:5422785-5422881:+	chr5	5422786	5422881	ENSG00000164151.11	ICE1	+	ATG	31	ENST00000296564.8	ENST00000296564.8.1
84	chr5:57175831-57175858:+	chr5	57175832	57175858	ENSG00000062194.15	GPBP1	+	ATG	8	ENST00000424459.7	ENST00000424459.7.1
85	chr5:61161109-61161196:-	chr5	61161110	61161196	ENSG00000188725.7	SMIM15	-	ATG	28	ENST00000339020.7	ENST00000339020.7.1
86	chr5:62306472-62308343:+	chr5	62306473	62308343	ENSG00000068796.16	KIF2A	+	ATG	32	ENST00000381103.6	ENST00000381103.6.1
87	chr5:64768954-64768993:+	chr5	64768955	64768993	ENSG00000153015.15	CWC27	+	ATG	12	ENST00000381070.7	ENST00000381070.7.1
88	chr5:65624828-65624951:+	chr5	65624829	65624951	ENSG00000113597.17	TRAPPC13	+	ATG	40	ENST00000399438.7	ENST00000399438.7.1
89	chr5:77030624-77030723:+	chr5	77030625	77030723	ENSG00000164252.12	AGGF1	+	ATG	32	ENST00000312916.11	ENST00000312916.11.1
90	chr5:77077874-77078689:-	chr5	77077875	77078689	ENSG00000132846.5	ZBED3	-	ATG	38	ENST00000255198.2	ENST00000255198.2.1
91	chr5:90529456-90529525:-	chr5	90529457	90529525	ENSG00000176018.12	LYSMD3	-	ATG	22	ENST00000315948.10	ENST00000315948.10.1
92	chr5:138542936-138543204:-	chr5	138542937	138543204	ENSG00000120705.12	ETF1	-	ATG	35	ENST00000360541.9	ENST00000360541.9.1
93	chr5:138021109-138021157:-	chr5	138021110	138021157	ENSG00000031003.10	FAM13B	-	ATG	15	ENST00000033079.7	ENST00000033079.7.1
94	chr5:140564843-140566762:+	chr5	140564844	140566762	ENSG00000176087.14	SLC35A4	+	ATG	103	ENST00000323146.7	ENST00000323146.7.1
95	chr5:141320513-141320723:-	chr5	141320514	141320723	ENSG00000178913.7	TAF7	-	ATG	69	ENST00000313368.7	ENST00000313368.7.1
96	chr5:147671902-147782553:-	chr5	147671903	147782553	ENSG00000176049.15	JAKMIP2	-	ATG	49	ENST00000265272.9	ENST00000265272.9.1
97	chr5:173328349-173328385:-	chr5	173328350	173328385	ENSG00000113739.10	STC2	-	ATG	11	ENST00000265087.8	ENST00000265087.8.1
98	chr5:176238508-176261111:+	chr5	176238509	176261111	ENSG00000170085.17	SIMC1	+	ATG	70	ENST00000443967.5	ENST00000443967.5.1
99	chr5:176361647-176361710:-	chr5	176361648	176361710	ENSG00000122203.14	KIAA1191	-	ATG	20	ENST00000298569.8	ENST00000298569.8.1
100	chr5:180851346-180851466:-	chr5	180851347	180851466	ENSG00000196670.13	ZFP62	-	ATG	39	ENST00000512132.5	ENST00000512132.5.1
101	chr6:7389889-7389952:+	chr6	7389890	7389952	ENSG00000124784.8	RIOK1	+	ATG	20	ENST00000379834.6	ENST00000379834.6.1
102	chr6:24719329-24719554:-	chr6	24719330	24719554	ENSG00000112308.12	C6orf62	-	ATG	74	ENST00000378119.8	ENST00000378119.8.2
103	chr6:34392524-34392644:-	chr6	34392525	34392644	ENSG00000272325.1	NUDT3	-	ATG	39	ENST00000607016.1	ENST00000607016.1.1
104	chr6:35281122-35281179:+	chr6	35281123	35281179	ENSG00000065029.14	ZNF76	+	ATG	18	ENST00000373953.7	ENST00000373953.7.1
105	chr6:35411046-35421847:+	chr6	35411047	35421847	ENSG00000112033.13	PPARD	+	ATG	117	ENST00000311565.4	ENST00000311565.4.1
106	chr6:53065601-53065673:+	chr6	53065602	53065673	ENSG00000112146.16	FBXO9	+	ATG	23	ENST00000323557.11	ENST00000323557.11.1
107	chr6:127343373-127343427:-	chr6	127343374	127343427	ENSG00000093144.18	ECHDC1	-	ATG	17	ENST00000454859.7	ENST00000454859.7.1
108	chr6:133241609-133241675:+	chr6	133241610	133241675	ENSG00000112319.18	EYA4	+	ATG	21	ENST00000367895.9	ENST00000367895.9.1
109	chr6:152975614-152983469:-	chr6	152975615	152983469	ENSG00000112029.9	FBXO5	-	ATG	80	ENST00000367241.3	ENST00000367241.3.1
110	chr6:159790513-159790549:+	chr6	159790514	159790549	ENSG00000112110.9	MRPL18	+	ATG	11	ENST00000367034.4	ENST00000367034.4.1
111	chr7:17940324-17940483:-	chr7	17940325	17940483	ENSG00000071189.21	SNX13	-	ATG	52	ENST00000428135.7	ENST00000428135.7.1
112	chr7:35253937-35253970:-	chr7	35253938	35253970	ENSG00000164532.10	TBX20	-	ATG	10	ENST00000408931.3	ENST00000408931.3.1
113	chr7:35694433-35694487:-	chr7	35694434	35694487	ENSG00000122557.9	HERPUD2	-	ATG	17	ENST00000396081.5	ENST00000396081.5.1
114	chr7:66205482-66240404:+	chr7	66205483	66240404	ENSG00000169902.13	TPST1	+	ATG	39	ENST00000304842.5	ENST00000304842.5.1
115	chr7:64679198-64691247:+	chr7	64679199	64691247	ENSG00000196247.11	ZNF107	+	ATG	45	ENST00000344930.7	ENST00000344930.7.1
116	chr7:72879425-72879524:+	chr7	72879426	72879524	ENSG00000196313.11	POM121	+	ATG	32	ENST00000395270.5	ENST00000395270.5.1
117	chr7:75073752-75073776:-	chr7	75073753	75073776	ENSG00000274523.4	WBSCR16	-	ATG	7	ENST00000610322.4	ENST00000610322.4.1
118	chr7:83648741-83648792:-	chr7	83648742	83648792	ENSG00000170381.13	SEMA3E	-	ATG	16	ENST00000643230.1	ENST00000643230.1.1
119	chr7:99408834-99408885:+	chr7	99408835	99408885	ENSG00000106245.10	BUD31	+	ATG	16	ENST00000403633.6	ENST00000403633.6.1
120	chr7:98881102-98881126:+	chr7	98881103	98881126	ENSG00000196367.13	TRRAP	+	ATG	7	ENST00000355540.7	ENST00000355540.7.1
121	chr7:108569625-108569682:-	chr7	108569626	108569682	ENSG00000177683.13	THAP5	-	ATG	18	ENST00000415914.3	ENST00000415914.3.1
122	chr7:105532286-105536573:+	chr7	105532287	105536573	ENSG00000135249.7	RINT1	+	ATG	41	ENST00000257700.6	ENST00000257700.6.1
123	chr7:103344697-103344754:-	chr7	103344698	103344754	ENSG00000105821.14	DNAJC2	-	ATG	18	ENST00000379263.7	ENST00000379263.7.1
124	chr7:134646838-134661464:+	chr7	134646839	134661464	ENSG00000172331.11	BPGM	+	ATG	38	ENST00000344924.7	ENST00000344924.7.1
125	chr7:129054849-129054888:-	chr7	129054850	129054888	ENSG00000064419.13	TNPO3	-	ATG	12	ENST00000265388.9	ENST00000265388.9.1
126	chr8:17247067-17247109:+	chr8	17247068	17247109	ENSG00000155975.9	VPS37A	+	ATG	13	ENST00000324849.8	ENST00000324849.8.1
127	chr8:43097556-43102538:+	chr8	43097557	43102538	ENSG00000185900.9	POMK	+	ATG	30	ENST00000331373.9	ENST00000331373.9.1
128	chr8:55762965-55763007:-	chr8	55762966	55763007	ENSG00000167904.14	TMEM68	-	ATG	13	ENST00000334667.6	ENST00000334667.6.1
129	chr8:120811833-120813121:-	chr8	120811834	120813121	ENSG00000172164.13	SNTB1	-	ATG	90	ENST00000395601.7	ENST00000395601.7.1
130	chr8:123347259-123356434:-	chr8	123347260	123356434	ENSG00000156802.12	ATAD2	-	ATG	138	ENST00000521903.5	ENST00000521903.5.1
131	chr8:109540190-109540424:+	chr8	109540191	109540424	ENSG00000147654.14	EBAG9	+	ATG	77	ENST00000337573.9	ENST00000337573.9.1
132	chr9:34179060-34179147:+	chr9	34179061	34179147	ENSG00000165006.13	UBAP1	+	ATG	28	ENST00000297661.8	ENST00000297661.8.1
133	chr9:38068784-38068904:-	chr9	38068785	38068904	ENSG00000107338.9	SHB	-	ATG	39	ENST00000377707.3	ENST00000377707.3.1
134	chr9:38392734-38395780:+	chr9	38392735	38395780	ENSG00000137124.7	ALDH1B1	+	ATG	37	ENST00000377698.3	ENST00000377698.3.1
135	chr9:35732635-35732824:+	chr9	35732636	35732824	ENSG00000107175.11	CREB3	+	ATG	62	ENST00000353704.2	ENST00000353704.2.1
136	chr9:93453254-93453491:-	chr9	93453255	93453491	ENSG00000188938.15	FAM120AOS	-	ATG	78	ENST00000375412.9	ENST00000375412.9.1
137	chr9:96777684-96777828:-	chr9	96777685	96777828	ENSG00000081386.12	ZNF510	-	ATG	47	ENST00000375231.5	ENST00000375231.5.1
138	chr9:95875916-95880940:+	chr9	95875917	95880940	ENSG00000182150.15	ERCC6L2	+	ATG	79	ENST00000288985.11	ENST00000288985.11.1
139	chr9:105244803-105244827:+	chr9	105244804	105244827	ENSG00000070214.15	SLC44A1	+	ATG	7	ENST00000374724.1	ENST00000374724.1.1
140	chr9:105574979-105575033:+	chr9	105574980	105575033	ENSG00000106692.14	FKTN	+	ATG	17	ENST00000223528.6	ENST00000223528.6.1
141	chr9:107489437-107489620:-	chr9	107489438	107489620	ENSG00000136826.14	KLF4	-	ATG	60	ENST00000374672.4	ENST00000374672.4.1
142	chr9:112297861-112333477:-	chr9	112297862	112333477	ENSG00000119314.15	PTBP3	-	ATG	20	ENST00000374257.5	ENST00000374257.5.1
143	chr9:128127843-128128413:-	chr9	128127844	128128413	ENSG00000148334.14	PTGES2	-	ATG	189	ENST00000338961.10	ENST00000338961.10.1
144	chr9:128886027-128886105:+	chr9	128886028	128886105	ENSG00000136802.11	LRRC8A	+	ATG	25	ENST00000372600.8	ENST00000372600.8.1
145	chr9:128702572-128702839:+	chr9	128702573	128702839	ENSG00000160447.6	PKN3	+	ATG	88	ENST00000291906.4	ENST00000291906.4.1
146	chr9:125707113-125707143:-	chr9	125707114	125707143	ENSG00000119487.16	MAPKAP1	-	ATG	9	ENST00000373511.6	ENST00000373511.6.1
147	chr9:131530631-131531196:-	chr9	131530632	131531196	ENSG00000130717.12	UCK1	-	ATG	47	ENST00000372215.4	ENST00000372215.4.1
148	chr9:135484056-135484455:+	chr9	135484057	135484455	ENSG00000196422.10	PPP1R26	+	ATG	10	ENST00000605286.5	ENST00000605286.5.1
149	chr9:136116980-136118602:-	chr9	136116981	136118602	ENSG00000238227.7	C9orf69	-	ATG	53	ENST00000418388.5	ENST00000418388.5.1
150	chr9:134025862-134025988:+	chr9	134025863	134025988	ENSG00000235106.9	RP11-374P20.5	+	ATG	41	ENST00000603928.2	ENST00000603928.2.1
151	chr10:22321234-22321324:+	chr10	22321235	22321324	ENSG00000168283.13	BMI1	+	ATG	29	ENST00000376663.7	ENST00000376663.7.1
152	chr10:18651382-18651448:-	chr10	18651383	18651448	ENSG00000241058.3	NSUN6	-	ATG	21	ENST00000377304.6	ENST00000377304.6.1
153	chr10:28535610-28590796:+	chr10	28535611	28590796	ENSG00000095787.21	WAC	+	ATG	148	ENST00000375664.8	ENST00000375664.8.1
154	chr10:68721250-68722467:+	chr10	68721251	68722467	ENSG00000060339.13	CCAR1	+	ATG	14	ENST00000265872.10	ENST00000265872.10.1
155	chr10:92291216-92311190:+	chr10	92291217	92311190	ENSG00000198060.9	MARCH5	+	ATG	122	ENST00000358935.2	ENST00000358935.2.1
156	chr10:98443214-98445396:-	chr10	98443215	98445396	ENSG00000107521.18	HPS1	-	ATG	40	ENST00000325103.10	ENST00000325103.10.1
157	chr10:96832302-96833452:+	chr10	96832303	96833452	ENSG00000196233.13	LCOR	+	ATG	47	ENST00000421806.3	ENST00000421806.3.1
158	chr10:100987823-100987892:+	chr10	100987824	100987892	ENSG00000107815.8	TWNK	+	ATG	22	ENST00000370228.2	ENST00000370228.2.1
159	chr10:99659877-99659928:+	chr10	99659878	99659928	ENSG00000198018.6	ENTPD7	+	ATG	16	ENST00000370489.4	ENST00000370489.4.1
160	chr10:114174042-114174087:-	chr10	114174043	114174087	ENSG00000165813.18	CCDC186	-	ATG	14	ENST00000369287.7	ENST00000369287.7.1
161	chr11:2400608-2400794:+	chr11	2400609	2400794	ENSG00000184281.14	TSSC4	+	ATG	61	ENST00000380996.9	ENST00000380996.9.1
162	chr11:7020077-7020116:-	chr11	7020078	7020116	ENSG00000149050.9	ZNF214	-	ATG	12	ENST00000278314.4	ENST00000278314.4.1
163	chr11:7252173-7303165:+	chr11	7252174	7303165	ENSG00000170743.16	SYT9	+	ATG	94	ENST00000318881.10	ENST00000318881.10.1
164	chr11:13349986-13350007:+	chr11	13349987	13350007	ENSG00000133794.17	ARNTL	+	ATG	6	ENST00000401424.5	ENST00000401424.5.1
165	chr11:61364355-61366169:+	chr11	61364356	61366169	ENSG00000149483.11	TMEM138	+	ATG	95	ENST00000278826.10	ENST00000278826.10.1
166	chr11:64234537-64234792:+	chr11	64234538	64234792	ENSG00000173511.9	VEGFB	+	ATG	84	ENST00000309422.6	ENST00000309422.6.1
167	chr11:65041010-65041058:+	chr11	65041011	65041058	ENSG00000168061.14	SAC3D1	+	ATG	15	ENST00000531072.1	ENST00000531072.1.1
168	chr11:73981511-73983034:-	chr11	73981512	73983034	ENSG00000175567.8	UCP2	-	ATG	144	ENST00000310473.7	ENST00000310473.7.1
169	chr11:83285968-83286172:-	chr11	83285969	83286172	ENSG00000137500.9	CCDC90B	-	ATG	67	ENST00000529689.5	ENST00000529689.5.1
170	chr11:94494005-94496639:+	chr11	94494006	94496639	ENSG00000168876.8	ANKRD49	+	ATG	21	ENST00000544612.5	ENST00000544612.5.1
171	chr11:95924050-95924092:-	chr11	95924051	95924092	ENSG00000087053.18	MTMR2	-	ATG	13	ENST00000346299.9	ENST00000346299.9.1
172	chr11:124623042-124623087:+	chr11	124623043	124623087	ENSG00000154144.12	TBRG1	+	ATG	14	ENST00000441174.7	ENST00000441174.7.1
173	chr12:14803426-14803465:-	chr12	14803427	14803465	ENSG00000084463.7	WBP11	-	ATG	12	ENST00000261167.6	ENST00000261167.6.1
174	chr12:47964211-47964298:+	chr12	47964212	47964298	ENSG00000134291.11	TMEM106C	+	ATG	28	ENST00000256686.10	ENST00000256686.10.1
175	chr12:45990414-45990441:-	chr12	45990415	45990441	ENSG00000139218.17	SCAF11	-	ATG	8	ENST00000369367.7	ENST00000369367.7.1
176	chr12:49460794-49484661:+	chr12	49460795	49484661	ENSG00000123352.17	SPATS2	+	ATG	104	ENST00000553127.5	ENST00000553127.5.1
177	chr12:54183813-54183948:-	chr12	54183814	54183948	ENSG00000123415.15	SMUG1	-	ATG	44	ENST00000513838.5	ENST00000513838.5.1
178	chr12:56216532-56216574:-	chr12	56216533	56216574	ENSG00000181852.17	RNF41	-	ATG	13	ENST00000345093.8	ENST00000345093.8.1
179	chr12:107685781-107685889:+	chr12	107685782	107685889	ENSG00000136045.11	PWP1	+	ATG	35	ENST00000412830.7	ENST00000412830.7.1
180	chr12:107760610-107761008:-	chr12	107760611	107761008	ENSG00000110851.11	PRDM4	-	ATG	70	ENST00000228437.9	ENST00000228437.9.1
181	chr12:96400192-96400222:-	chr12	96400193	96400222	ENSG00000059758.7	CDK17	-	ATG	9	ENST00000261211.7	ENST00000261211.7.1
182	chr12:110583230-110583302:-	chr12	110583231	110583302	ENSG00000196850.5	PPTC7	-	ATG	23	ENST00000354300.4	ENST00000354300.4.1
183	chr12:111842236-111842371:+	chr12	111842237	111842371	ENSG00000089022.13	MAPKAPK5	+	ATG	44	ENST00000550735.6	ENST00000550735.6.1
184	chr12:118016827-118017690:+	chr12	118016828	118017690	ENSG00000111445.13	RFC5	+	ATG	21	ENST00000392542.6	ENST00000392542.6.1
185	chr12:120687179-120687227:+	chr12	120687180	120687227	ENSG00000110917.7	MLEC	+	ATG	15	ENST00000228506.7	ENST00000228506.7.1
186	chr12:120534696-120534957:+	chr12	120534697	120534957	ENSG00000022840.15	RNF10	+	ATG	86	ENST00000325954.8	ENST00000325954.8.1
187	chr12:122483446-122492734:-	chr12	122483447	122492734	ENSG00000033030.13	ZCCHC8	-	ATG	106	ENST00000543897.5	ENST00000543897.5.1
188	chr12:124863595-124863901:-	chr12	124863596	124863901	ENSG00000073060.15	SCARB1	-	ATG	101	ENST00000339570.9	ENST00000339570.9.1
189	chr13:39037785-39037938:-	chr13	39037786	39037938	ENSG00000120685.19	PROSER1	-	ATG	50	ENST00000352251.7	ENST00000352251.7.1
190	chr13:52024717-52028590:+	chr13	52024718	52028590	ENSG00000253797.2	UTP14C	+	ATG	163	ENST00000521776.2	ENST00000521776.2.1
191	chr13:71867109-71867181:-	chr13	71867110	71867181	ENSG00000276644.4	DACH1	-	ATG	23	ENST00000613252.4	ENST00000613252.4.1
192	chr13:97275991-97276057:+	chr13	97275992	97276057	ENSG00000139793.18	MBNL2	+	ATG	21	ENST00000397601.5	ENST00000397601.5.1
193	chr13:113491127-113495505:+	chr13	113491128	113495505	ENSG00000150403.17	TMCO3	+	ATG	49	ENST00000434316.6	ENST00000434316.6.1
194	chr14:20329246-20329366:-	chr14	20329247	20329366	ENSG00000100814.17	CCNB1IP1	-	ATG	39	ENST00000358932.8	ENST00000358932.8.1
195	chr14:24141267-24141547:-	chr14	24141268	24141547	ENSG00000100908.13	EMC9	-	ATG	52	ENST00000216799.8	ENST00000216799.8.1
196	chr14:28767104-28767299:+	chr14	28767105	28767299	ENSG00000176165.10	FOXG1	+	ATG	64	ENST00000313071.6	ENST00000313071.6.1
197	chr14:50668148-50668271:-	chr14	50668149	50668271	ENSG00000151748.14	SAV1	-	ATG	40	ENST00000324679.4	ENST00000324679.4.1
198	chr14:57268838-57268874:-	chr14	57268839	57268874	ENSG00000070367.15	EXOC5	-	ATG	11	ENST00000621441.4	ENST00000621441.4.1
199	chr14:57269195-57269291:+	chr14	57269196	57269291	ENSG00000053770.11	AP5M1	+	ATG	31	ENST00000261558.7	ENST00000261558.7.1
200	chr14:69398689-69398821:+	chr14	69398690	69398821	ENSG00000029364.11	SLC39A9	+	ATG	43	ENST00000556605.5	ENST00000556605.5.1
201	chr14:70342694-70359603:-	chr14	70342695	70359603	ENSG00000133983.14	COX16	-	ATG	39	ENST00000389912.6	ENST00000389912.6.1
202	chr14:77028549-77028597:-	chr14	77028550	77028597	ENSG00000119669.4	IRF2BPL	-	ATG	15	ENST00000238647.4	ENST00000238647.4.1
203	chr14:92121987-92122041:+	chr14	92121988	92122041	ENSG00000165934.12	CPSF2	+	ATG	17	ENST00000298875.8	ENST00000298875.8.1
204	chr15:22838747-22838861:+	chr15	22838748	22838861	ENSG00000140157.14	NIPA2	+	ATG	37	ENST00000337451.7	ENST00000337451.7.1
205	chr15:50908720-50912112:+	chr15	50908721	50912112	ENSG00000081014.10	AP4E1	+	ATG	80	ENST00000261842.9	ENST00000261842.9.1
206	chr15:68278130-68278184:+	chr15	68278131	68278184	ENSG00000169018.5	FEM1B	+	ATG	17	ENST00000306917.4	ENST00000306917.4.1
207	chr15:70097054-70097132:-	chr15	70097055	70097132	ENSG00000140332.15	TLE3	-	ATG	25	ENST00000558939.5	ENST00000558939.5.1
208	chr15:77252443-77252497:-	chr15	77252444	77252497	ENSG00000173517.10	PEAK1	-	ATG	17	ENST00000560626.6	ENST00000560626.6.1
209	chr15:81001167-81001221:+	chr15	81001168	81001221	ENSG00000140406.3	MESDC1	+	ATG	17	ENST00000267984.3	ENST00000267984.3.1
210	chr15:81001260-81001410:+	chr15	81001261	81001410	ENSG00000140406.3	MESDC1	+	ATG	49	ENST00000267984.3	ENST00000267984.3.2
211	chr15:89088485-89088539:+	chr15	89088486	89088539	ENSG00000140526.17	ABHD2	+	ATG	17	ENST00000352732.9	ENST00000352732.9.1
212	chr16:53951-55489:+	chr16	53952	55489	ENSG00000161981.10	SNRNP25	+	ATG	45	ENST00000293861.7	ENST00000293861.7.1
213	chr16:689833-689917:-	chr16	689834	689917	ENSG00000127580.15	WDR24	-	ATG	27	ENST00000293883.8	ENST00000293883.8.1
214	chr16:28491769-28491796:-	chr16	28491770	28491796	ENSG00000188603.19	CLN3	-	ATG	8	ENST00000569430.6	ENST00000569430.6.1
215	chr16:30700708-30704082:+	chr16	30700709	30704082	ENSG00000080603.16	SRCAP	+	ATG	62	ENST00000262518.8	ENST00000262518.8.1
216	chr16:47143754-47143856:-	chr16	47143755	47143856	ENSG00000171208.9	NETO2	-	ATG	33	ENST00000562435.5	ENST00000562435.5.1
217	chr16:57204541-57204658:+	chr16	57204542	57204658	ENSG00000159579.13	RSPRY1	+	ATG	38	ENST00000394420.8	ENST00000394420.8.1
218	chr16:66934549-66934678:+	chr16	66934550	66934678	ENSG00000172831.11	CES2	+	ATG	42	ENST00000317091.8	ENST00000317091.8.1
219	chr16:67227148-67227879:+	chr16	67227149	67227879	ENSG00000168701.18	TMEM208	+	ATG	39	ENST00000304800.13	ENST00000304800.13.1
220	chr16:67893275-67908685:+	chr16	67893276	67908685	ENSG00000159792.9	PSKH1	+	ATG	33	ENST00000291041.5	ENST00000291041.5.1
221	chr16:70398784-70398952:-	chr16	70398785	70398952	ENSG00000157350.12	ST3GAL2	-	ATG	55	ENST00000393640.8	ENST00000393640.8.1
222	chr16:70399325-70399433:-	chr16	70399326	70399433	ENSG00000157350.12	ST3GAL2	-	ATG	35	ENST00000393640.8	ENST00000393640.8.2
223	chr16:70523834-70523873:+	chr16	70523835	70523873	ENSG00000189091.12	SF3B3	+	ATG	12	ENST00000302516.9	ENST00000302516.9.1
224	chr16:75644452-75647639:-	chr16	75644453	75647639	ENSG00000065427.14	KARS	-	ATG	23	ENST00000319410.9	ENST00000319410.9.1
225	chr16:84102015-84102051:-	chr16	84102016	84102051	ENSG00000140943.16	MBTPS1	-	ATG	11	ENST00000343411.7	ENST00000343411.7.1
226	chr17:3668826-3668862:+	chr17	3668827	3668862	ENSG00000127774.6	TMEM93	+	ATG	11	ENST00000248378.5	ENST00000248378.5.1
227	chr17:15651674-15677212:-	chr17	15651675	15677212	ENSG00000221926.11	TRIM16	-	ATG	102	ENST00000578237.5	ENST00000578237.5.1
228	chr17:16380933-16380957:+	chr17	16380934	16380957	ENSG00000170315.13	UBB	+	ATG	7	ENST00000302182.7	ENST00000302182.7.1
229	chr17:18314780-18314822:-	chr17	18314781	18314822	ENSG00000177302.14	TOP3A	-	ATG	13	ENST00000321105.9	ENST00000321105.9.1
230	chr17:18315568-18315607:+	chr17	18315569	18315607	ENSG00000176994.10	SMCR8	+	ATG	12	ENST00000406438.4	ENST00000406438.4.1
231	chr17:28339417-28339453:+	chr17	28339418	28339453	ENSG00000109079.9	TNFAIP1	+	ATG	11	ENST00000226225.6	ENST00000226225.6.1
232	chr17:30832278-30832320:+	chr17	30832279	30832320	ENSG00000176208.8	ATAD5	+	ATG	13	ENST00000321990.4	ENST00000321990.4.1
233	chr17:32007988-32017986:+	chr17	32007989	32017986	ENSG00000185158.12	LRRC37B	+	ATG	52	ENST00000543378.6	ENST00000543378.6.1
234	chr17:42824188-42824248:-	chr17	42824189	42824248	ENSG00000126581.12	BECN1	-	ATG	19	ENST00000361523.8	ENST00000361523.8.1
235	chr17:47189181-47189250:-	chr17	47189182	47189250	ENSG00000004897.11	CDC27	-	ATG	22	ENST00000066544.7	ENST00000066544.7.1
236	chr17:49707822-49708086:-	chr17	49707823	49708086	ENSG00000121073.13	SLC35B1	-	ATG	87	ENST00000240333.10	ENST00000240333.10.1
237	chr17:58351501-58352135:-	chr17	58351502	58352135	ENSG00000213246.6	SUPT4H1	-	ATG	25	ENST00000577396.5	ENST00000577396.5.1
238	chr17:59699157-59699898:-	chr17	59699158	59699898	ENSG00000141378.14	PTRH2	-	ATG	246	ENST00000409433.2	ENST00000409433.2.1
239	chr17:77088764-77088881:+	chr17	77088765	77088881	ENSG00000129657.14	SEC14L1	+	ATG	38	ENST00000392476.6	ENST00000392476.6.1
240	chr17:80013492-80013576:-	chr17	80013493	80013576	ENSG00000167291.15	TBC1D16	-	ATG	27	ENST00000310924.6	ENST00000310924.6.1
241	chr17:81395488-81399608:+	chr17	81395489	81399608	ENSG00000266074.8	BAHCC1	+	ATG	73	ENST00000584436.7	ENST00000584436.7.1
242	chr18:2571272-2571296:-	chr18	2571273	2571296	ENSG00000101574.14	METTL4	-	ATG	7	ENST00000319888.10	ENST00000319888.10.1
243	chr18:59139642-59139930:+	chr18	59139643	59139930	ENSG00000166562.8	SEC11C	+	ATG	95	ENST00000587834.5	ENST00000587834.5.1
244	chr18:57621772-57621820:-	chr18	57621773	57621820	ENSG00000134440.11	NARS	-	ATG	15	ENST00000256854.9	ENST00000256854.9.1
245	chr19:893135-893162:-	chr19	893136	893162	ENSG00000175221.14	MED16	-	ATG	8	ENST00000395808.7	ENST00000395808.7.1
246	chr19:1911902-1912160:+	chr19	1911903	1912160	ENSG00000213638.5	ADAT3	+	ATG	85	ENST00000329478.3	ENST00000329478.3.1
247	chr19:11529065-11529122:-	chr19	11529066	11529122	ENSG00000130159.13	ECSIT	-	ATG	18	ENST00000270517.11	ENST00000270517.11.1
248	chr19:18557906-18562105:+	chr19	18557907	18562105	ENSG00000105700.10	KXD1	+	ATG	25	ENST00000222307.8	ENST00000222307.8.1
249	chr19:36236033-36236153:+	chr19	36236034	36236153	ENSG00000167635.11	ZNF146	+	ATG	39	ENST00000443387.2	ENST00000443387.2.1
250	chr19:36236265-36236337:+	chr19	36236266	36236337	ENSG00000167635.11	ZNF146	+	ATG	23	ENST00000443387.2	ENST00000443387.2.2
251	chr19:36589619-36589691:-	chr19	36589620	36589691	ENSG00000186020.12	ZNF529	-	ATG	23	ENST00000586115.5	ENST00000586115.5.1
252	chr19:36114934-36115024:-	chr19	36114935	36115024	ENSG00000105258.8	POLR2I	-	ATG	29	ENST00000221859.8	ENST00000221859.8.1
253	chr19:39168229-39168271:+	chr19	39168230	39168271	ENSG00000130669.17	PAK4	+	ATG	13	ENST00000599386.5	ENST00000599386.5.1
254	chr19:40800522-40800603:+	chr19	40800523	40800603	ENSG00000269858.5	EGLN2	+	ATG	26	ENST00000303961.8	ENST00000303961.8.1
255	chr19:41268222-41272087:+	chr19	41268223	41272087	ENSG00000105323.16	HNRNPUL1	+	ATG	42	ENST00000352456.7	ENST00000352456.7.1
256	chr19:43596714-43597139:+	chr19	43596715	43597139	ENSG00000124444.15	ZNF576	+	ATG	24	ENST00000336564.4	ENST00000336564.4.1
257	chr19:48872553-48872634:+	chr19	48872554	48872634	ENSG00000087074.7	PPP1R15A	+	ATG	26	ENST00000200453.5	ENST00000200453.5.1
258	chr19:49929358-49929397:-	chr19	49929359	49929397	ENSG00000104951.15	IL4I1	-	ATG	12	ENST00000595948.5	ENST00000595948.5.1
259	chr19:55599465-55599495:-	chr19	55599466	55599495	ENSG00000179943.7	FIZ1	-	ATG	9	ENST00000590714.1	ENST00000590714.1.1
260	chr19:56601558-56621291:+	chr19	56601559	56621291	ENSG00000197951.8	ZNF71	+	ATG	18	ENST00000328070.10	ENST00000328070.10.1
261	chr19:57389920-57390004:+	chr19	57389921	57390004	ENSG00000188785.11	ZNF548	+	ATG	27	ENST00000366197.9	ENST00000366197.9.1
262	chr19:57559747-57559786:-	chr19	57559748	57559786	ENSG00000251369.8	ZNF550	-	ATG	12	ENST00000601415.5	ENST00000601415.5.1
263	chr20:325669-325732:+	chr20	325670	325732	ENSG00000177732.8	SOX12	+	ATG	20	ENST00000342665.4	ENST00000342665.4.1
264	chr20:10420545-10420737:-	chr20	10420546	10420737	ENSG00000125863.19	MKKS	-	ATG	63	ENST00000347364.7	ENST00000347364.7.1
265	chr20:44521993-44522038:-	chr20	44521994	44522038	ENSG00000132824.13	SERINC3	-	ATG	14	ENST00000342374.4	ENST00000342374.4.1
266	chr21:36699296-36699383:+	chr21	36699297	36699383	ENSG00000159263.15	SIM2	+	ATG	28	ENST00000290399.10	ENST00000290399.10.1
267	chr21:46318040-46322905:-	chr21	46318041	46322905	ENSG00000160298.17	C21orf58	-	ATG	148	ENST00000291691.11	ENST00000291691.11.1
268	chr21:46636928-46644318:+	chr21	46636929	46644318	ENSG00000160310.17	PRMT2	+	ATG	59	ENST00000355680.7	ENST00000355680.7.1
269	chr22:21000770-21002150:-	chr22	21000771	21002150	ENSG00000184436.11	THAP7	-	ATG	105	ENST00000399133.2	ENST00000399133.2.1
270	chr22:20917764-20917812:+	chr22	20917765	20917812	ENSG00000099942.12	CRKL	+	ATG	15	ENST00000354336.7	ENST00000354336.7.1
271	chr22:28883593-28883683:+	chr22	28883594	28883683	ENSG00000183579.15	ZNRF3	+	ATG	29	ENST00000544604.6	ENST00000544604.6.1
272	chr22:26481762-26481792:-	chr22	26481763	26481792	ENSG00000100099.20	HPS4	-	ATG	9	ENST00000398145.6	ENST00000398145.6.1
273	chr22:40400700-40400757:+	chr22	40400701	40400757	ENSG00000100359.20	SGSM3	+	ATG	18	ENST00000248929.13	ENST00000248929.13.1
274	chr22:41092589-41092703:+	chr22	41092590	41092703	ENSG00000100393.12	EP300	+	ATG	37	ENST00000263253.8	ENST00000263253.8.1
275	chr22:50294745-50307627:-	chr22	50294746	50307627	ENSG00000196576.14	PLXNB2	-	ATG	35	ENST00000449103.5	ENST00000449103.5.1
276	chrX:13735071-13740108:+	chrX	13735072	13740108	ENSG00000046651.14	OFD1	+	ATG	143	ENST00000380567.5	ENST00000380567.5.1
277	chrX:23783277-23783367:+	chrX	23783278	23783367	ENSG00000130066.16	SAT1	+	ATG	29	ENST00000379270.4	ENST00000379270.4.1
278	chrX:17746075-17749445:+	chrX	17746076	17749445	ENSG00000047634.14	SCML1	+	ATG	22	ENST00000380045.7	ENST00000380045.7.1
279	chrX:38033670-38033766:+	chrX	38033671	38033766	ENSG00000147041.11	SYTL5	+	ATG	31	ENST00000297875.6	ENST00000297875.6.1
280	chrX:38327440-38327485:-	chrX	38327441	38327485	ENSG00000156313.13	RPGR	-	ATG	14	ENST00000318842.11	ENST00000318842.11.1
281	chrX:153447877-153454493:-	chrX	153447878	153454493	ENSG00000183479.12	TREX2	-	ATG	43	ENST00000370232.3	ENST00000370232.3.1
282	chr1:3856991-3857192:-	chr1	3856992	3857192	ENSG00000116198.12	CEP104	-	ATG	66	ENST00000378230.7	ENST00000378230.7.1
283	chr1:11982068-11982092:+	chr1	11982069	11982092	ENSG00000116688.16	MFN2	+	ATG	7	ENST00000235329.9	ENST00000235329.9.1
284	chr1:17005067-17011757:-	chr1	17005068	17011757	ENSG00000159363.17	ATP13A2	-	ATG	103	ENST00000452699.5	ENST00000452699.5.1
285	chr1:26111863-26111914:+	chr1	26111864	26111914	ENSG00000175087.9	PDIK1L	+	ATG	16	ENST00000374271.8	ENST00000374271.8.1
286	chr1:31919562-31938010:-	chr1	31919563	31938010	ENSG00000184007.19	PTP4A2	-	ATG	39	ENST00000647444.1	ENST00000647444.1.1
287	chr1:35557212-35557269:-	chr1	35557213	35557269	ENSG00000142687.17	KIAA0319L	-	ATG	18	ENST00000325722.7	ENST00000325722.7.1
288	chr1:45691012-45691060:+	chr1	45691013	45691060	ENSG00000159596.6	TMEM69	+	ATG	15	ENST00000372025.4	ENST00000372025.4.1
289	chr1:50968787-50969330:+	chr1	50968788	50969330	ENSG00000123080.10	CDKN2C	+	ATG	180	ENST00000262662.5	ENST00000262662.5.1
290	chr1:52142373-52216464:+	chr1	52142374	52216464	ENSG00000157077.14	ZFYVE9	+	ATG	41	ENST00000357206.6	ENST00000357206.6.1
291	chr1:113759066-113759126:-	chr1	113759067	113759126	ENSG00000116793.15	PHTF1	-	ATG	19	ENST00000369604.5	ENST00000369604.5.1
292	chr1:113905495-113905570:+	chr1	113905496	113905570	ENSG00000118655.4	DCLRE1B	+	ATG	24	ENST00000369563.3	ENST00000369563.3.1
293	chr1:113929846-113929921:+	chr1	113929847	113929921	ENSG00000163349.21	HIPK1	+	ATG	24	ENST00000369558.5	ENST00000369558.5.1
294	chr1:112619385-112619493:+	chr1	112619386	112619493	ENSG00000116489.12	CAPZA1	+	ATG	35	ENST00000263168.3	ENST00000263168.3.1
295	chr1:154272679-154272727:+	chr1	154272680	154272727	ENSG00000143575.14	HAX1	+	ATG	15	ENST00000328703.11	ENST00000328703.11.1
296	chr1:179082103-179082193:+	chr1	179082104	179082193	ENSG00000186283.13	TOR3A	+	ATG	29	ENST00000352445.10	ENST00000352445.10.1
297	chr1:203802093-203802192:+	chr1	203802094	203802192	ENSG00000058673.16	ZC3H11A	+	ATG	32	ENST00000639812.1	ENST00000639812.1.1
298	chr1:211829298-211830631:-	chr1	211829299	211830631	ENSG00000123684.12	LPGAT1	-	ATG	27	ENST00000366997.8	ENST00000366997.8.1
299	chr1:222712693-222712714:+	chr1	222712694	222712714	ENSG00000162819.11	BROX	+	ATG	6	ENST00000340934.9	ENST00000340934.9.1
300	chr1:241848809-241848917:+	chr1	241848810	241848917	ENSG00000174371.16	EXO1	+	ATG	35	ENST00000366548.7	ENST00000366548.7.2
301	chr2:24793409-24799726:+	chr2	24793410	24799726	ENSG00000138092.10	CENPO	+	ATG	47	ENST00000473706.5	ENST00000473706.5.1
302	chr2:27211485-27212205:-	chr2	27211486	27212205	ENSG00000138074.14	SLC5A6	-	ATG	77	ENST00000310574.7	ENST00000310574.7.1
303	chr2:38778194-38778278:+	chr2	38778195	38778278	ENSG00000152147.10	GEMIN6	+	ATG	27	ENST00000409011.5	ENST00000409011.5.1
304	chr2:53765501-53859947:-	chr2	53765502	53859947	ENSG00000270898.5	GPR75-ASB3	-	ATG	67	ENST00000406625.5	ENST00000406625.5.1
305	chr2:65431995-65432040:-	chr2	65431996	65432040	ENSG00000198369.9	SPRED2	-	ATG	14	ENST00000356388.8	ENST00000356388.8.1
306	chr2:111121152-111123765:+	chr2	111121153	111123765	ENSG00000153094.22	BCL2L11	+	ATG	22	ENST00000393256.7	ENST00000393256.7.1
307	chr2:149587666-149587714:-	chr2	149587667	149587714	ENSG00000168288.12	MMADHC	-	ATG	15	ENST00000303319.9	ENST00000303319.9.1
308	chr2:134254265-134254310:+	chr2	134254266	134254310	ENSG00000152127.8	MGAT5	+	ATG	14	ENST00000409645.5	ENST00000409645.5.1
309	chr2:166307064-166311764:-	chr2	166307065	166311764	ENSG00000169432.15	SCN9A	-	ATG	91	ENST00000409672.5	ENST00000409672.5.1
310	chr2:175136458-175151079:-	chr2	175136459	175151079	ENSG00000115966.16	ATF2	-	ATG	15	ENST00000345739.9	ENST00000345739.9.2
311	chr2:199955476-199955536:-	chr2	199955477	199955536	ENSG00000162971.10	TYW5	-	ATG	19	ENST00000354611.8	ENST00000354611.8.1
312	chr2:201045506-201045566:-	chr2	201045507	201045566	ENSG00000155744.9	FAM126B	-	ATG	19	ENST00000418596.7	ENST00000418596.7.1
313	chr2:207769431-207769509:-	chr2	207769432	207769509	ENSG00000163251.3	FZD5	-	ATG	25	ENST00000295417.3	ENST00000295417.3.1
314	chr2:218562685-218562772:-	chr2	218562686	218562772	ENSG00000135913.10	USP37	-	ATG	28	ENST00000258399.7	ENST00000258399.7.1
315	chr2:232550240-232550285:-	chr2	232550241	232550285	ENSG00000221944.6	TIGD1	-	ATG	14	ENST00000408957.4	ENST00000408957.4.1
316	chr3:23945457-23945511:+	chr3	23945458	23945511	ENSG00000174738.12	NR1D2	+	ATG	17	ENST00000312521.8	ENST00000312521.8.1
317	chr3:50292303-50292483:-	chr3	50292304	50292483	ENSG00000214706.10	IFRD2	-	ATG	41	ENST00000436390.5	ENST00000436390.5.1
318	chr3:49510435-49510459:+	chr3	49510436	49510459	ENSG00000173402.11	DAG1	+	ATG	7	ENST00000308775.6	ENST00000308775.6.1
319	chr3:52700483-52704854:-	chr3	52700484	52704854	ENSG00000016864.18	GLT8D1	-	ATG	47	ENST00000478968.6	ENST00000478968.6.1
320	chr3:66500784-66500820:-	chr3	66500785	66500820	ENSG00000144749.13	LRIG1	-	ATG	11	ENST00000383703.3	ENST00000383703.3.1
321	chr3:149812901-149813291:+	chr3	149812902	149813291	ENSG00000082996.19	RNF13	+	ATG	129	ENST00000392894.7	ENST00000392894.7.1
322	chr3:152299842-152299980:+	chr3	152299843	152299980	ENSG00000152601.17	MBNL1	+	ATG	45	ENST00000355460.6	ENST00000355460.6.2
323	chr3:179347748-179347793:+	chr3	179347749	179347793	ENSG00000171109.18	MFN1	+	ATG	14	ENST00000471841.5	ENST00000471841.5.1
324	chr4:5711349-5719288:+	chr4	5711350	5719288	ENSG00000072840.12	EVC	+	ATG	81	ENST00000264956.10	ENST00000264956.10.1
325	chr4:17804650-17804689:-	chr4	17804651	17804689	ENSG00000163257.10	DCAF16	-	ATG	12	ENST00000382247.5	ENST00000382247.5.1
326	chr4:77066297-77075543:-	chr4	77066298	77075543	ENSG00000118816.9	CCNI	-	ATG	59	ENST00000237654.8	ENST00000237654.8.1
327	chr4:105708817-105717738:+	chr4	105708818	105717738	ENSG00000138780.14	GSTCD	+	ATG	114	ENST00000394730.7	ENST00000394730.7.1
328	chr4:147617623-147617659:+	chr4	147617624	147617659	ENSG00000164168.7	TMEM184C	+	ATG	11	ENST00000508208.5	ENST00000508208.5.1
329	chr4:147617704-147617833:+	chr4	147617705	147617833	ENSG00000164168.7	TMEM184C	+	ATG	42	ENST00000508208.5	ENST00000508208.5.2
330	chr5:69094205-69094247:+	chr5	69094206	69094247	ENSG00000145740.18	SLC30A5	+	ATG	13	ENST00000396591.7	ENST00000396591.7.1
331	chr5:79619623-79619707:+	chr5	79619624	79619707	ENSG00000164329.13	PAPD4	+	ATG	27	ENST00000423041.6	ENST00000423041.6.1
332	chr5:112976904-112985968:+	chr5	112976905	112985968	ENSG00000172795.15	DCP2	+	ATG	71	ENST00000389063.2	ENST00000389063.2.1
333	chr5:134618203-134620981:-	chr5	134618204	134620981	ENSG00000152700.13	SAR1B	-	ATG	52	ENST00000507419.5	ENST00000507419.5.1
334	chr5:134758801-134758837:+	chr5	134758802	134758837	ENSG00000145833.15	DDX46	+	ATG	11	ENST00000452510.6	ENST00000452510.6.1
335	chr5:150001014-150004883:+	chr5	150001015	150004883	ENSG00000113716.12	HMGXB3	+	ATG	65	ENST00000503427.5	ENST00000503427.5.1
336	chr6:24403000-24405171:+	chr6	24403001	24405171	ENSG00000124532.14	MRS2	+	ATG	79	ENST00000378386.7	ENST00000378386.7.1
337	chr6:21593910-21594057:+	chr6	21593911	21594057	ENSG00000124766.6	SOX4	+	ATG	48	ENST00000244745.3	ENST00000244745.3.1
338	chr6:53041265-53041385:-	chr6	53041266	53041385	ENSG00000112144.15	ICK	-	ATG	39	ENST00000350082.9	ENST00000350082.9.1
339	chr6:78867553-78867742:+	chr6	78867554	78867742	ENSG00000146243.13	IRAK1BP1	+	ATG	62	ENST00000369940.6	ENST00000369940.6.1
340	chr6:97282439-97282520:-	chr6	97282440	97282520	ENSG00000146263.11	MMS22L	-	ATG	26	ENST00000275053.8	ENST00000275053.8.1
341	chr6:95586431-95586506:+	chr6	95586432	95586506	ENSG00000172469.15	MANEA	+	ATG	24	ENST00000358812.8	ENST00000358812.8.1
342	chr6:156777382-156777520:+	chr6	156777383	156777520	ENSG00000049618.22	ARID1B	+	ATG	45	ENST00000346085.9	ENST00000346085.9.1
343	chr7:1158246-1160132:-	chr7	1158247	1160132	ENSG00000178381.11	ZFAND2A	-	ATG	59	ENST00000401903.5	ENST00000401903.5.1
344	chr7:66996843-66996897:+	chr7	66996844	66996897	ENSG00000198874.12	TYW1	+	ATG	17	ENST00000359626.9	ENST00000359626.9.1
345	chr7:75486175-75486202:-	chr7	75486176	75486202	ENSG00000272391.5	POM121C	-	ATG	8	ENST00000615331.4	ENST00000615331.4.1
346	chr7:101252018-101252120:-	chr7	101252019	101252120	ENSG00000214253.8	FIS1	-	ATG	33	ENST00000474120.5	ENST00000474120.5.1
347	chr7:150368902-150388451:+	chr7	150368903	150388451	ENSG00000284041.1	RP11-511P7.7	+	ATG	22	ENST00000478789.5	ENST00000478789.5.1
348	chr8:23449986-23457608:-	chr8	23449987	23457608	ENSG00000197217.12	ENTPD4	-	ATG	20	ENST00000356206.10	ENST00000356206.10.1
349	chr8:33453499-33461642:-	chr8	33453500	33461642	ENSG00000172728.15	FUT10	-	ATG	93	ENST00000327671.9	ENST00000327671.9.1
350	chr8:38176276-38176606:-	chr8	38176277	38176606	ENSG00000175324.9	LSM1	-	ATG	109	ENST00000311351.8	ENST00000311351.8.1
351	chr8:43102587-43122120:+	chr8	43102588	43122120	ENSG00000185900.9	POMK	+	ATG	109	ENST00000331373.9	ENST00000331373.9.2
352	chr8:73294935-73294959:+	chr8	73294936	73294959	ENSG00000121039.9	RDH10	+	ATG	7	ENST00000240285.9	ENST00000240285.9.1
353	chr8:144517670-144517784:-	chr8	144517671	144517784	ENSG00000160957.12	RECQL4	-	ATG	37	ENST00000621189.4	ENST00000621189.4.1
354	chr8:144519619-144519967:+	chr8	144519620	144519967	ENSG00000160959.7	LRRC14	+	ATG	115	ENST00000292524.5	ENST00000292524.5.1
355	chr9:120788274-120793252:-	chr9	120788275	120793252	ENSG00000119402.16	FBXW2	-	ATG	35	ENST00000608872.5	ENST00000608872.5.1
356	chr9:137459131-137459278:-	chr9	137459132	137459278	ENSG00000165802.22	NSMF	-	ATG	48	ENST00000265663.12	ENST00000265663.12.1
357	chr10:12195809-12195911:-	chr10	12195810	12195911	ENSG00000165609.12	NUDT5	-	ATG	33	ENST00000491614.5	ENST00000491614.5.1
358	chr10:38010753-38012345:+	chr10	38010754	38012345	ENSG00000189180.15	ZNF33A	+	ATG	25	ENST00000469037.2	ENST00000469037.2.1
359	chr10:32056173-32056200:-	chr10	32056174	32056200	ENSG00000170759.10	KIF5B	-	ATG	8	ENST00000302418.4	ENST00000302418.4.1
360	chr10:71964629-72005757:+	chr10	71964630	72005757	ENSG00000122863.5	CHST3	+	ATG	28	ENST00000373115.4	ENST00000373115.4.1
361	chr10:91222719-91222824:+	chr10	91222720	91222824	ENSG00000180628.14	PCGF5	+	ATG	34	ENST00000336126.5	ENST00000336126.5.1
362	chr10:100912983-100913136:+	chr10	100912984	100913136	ENSG00000119906.11	SLF2	+	ATG	50	ENST00000238961.8	ENST00000238961.8.1
363	chr10:102424780-102432576:-	chr10	102424781	102432576	ENSG00000107874.10	CUEDC2	-	ATG	48	ENST00000369937.4	ENST00000369937.4.1
364	chr10:112445458-112445542:-	chr10	112445459	112445542	ENSG00000023041.11	ZDHHC6	-	ATG	27	ENST00000626395.2	ENST00000626395.2.1
365	chr10:124046318-124046444:-	chr10	124046319	124046444	ENSG00000182022.17	CHST15	-	ATG	41	ENST00000346248.7	ENST00000346248.7.1
366	chr11:207788-207950:+	chr11	207789	207950	ENSG00000177963.14	RIC8A	+	ATG	53	ENST00000526104.5	ENST00000526104.5.1
367	chr11:803397-804419:-	chr11	803398	804419	ENSG00000177595.17	PIDD1	-	ATG	171	ENST00000347755.9	ENST00000347755.9.1
368	chr11:10808853-10808904:-	chr11	10808854	10808904	ENSG00000110321.16	EIF4G2	-	ATG	16	ENST00000339995.9	ENST00000339995.9.1
369	chr11:66438782-66438821:-	chr11	66438783	66438821	ENSG00000174547.13	MRPL11	-	ATG	12	ENST00000430466.6	ENST00000430466.6.1
370	chr11:68263865-68268196:-	chr11	68263866	68268196	ENSG00000171067.10	C11orf24	-	ATG	47	ENST00000304271.10	ENST00000304271.10.1
371	chr11:108009040-108009148:+	chr11	108009041	108009148	ENSG00000166266.13	CUL5	+	ATG	35	ENST00000393094.6	ENST00000393094.6.1
372	chr11:117229843-117232337:-	chr11	117229844	117232337	ENSG00000160613.12	PCSK7	-	ATG	147	ENST00000320934.7	ENST00000320934.7.1
373	chr12:29371657-29381143:-	chr12	29371658	29381143	ENSG00000087502.17	ERGIC2	-	ATG	13	ENST00000360150.8	ENST00000360150.8.1
374	chr12:49566197-49568050:-	chr12	49566198	49568050	ENSG00000187778.13	MCRS1	-	ATG	46	ENST00000343810.8	ENST00000343810.8.1
375	chr12:46268860-46268905:-	chr12	46268861	46268905	ENSG00000111371.15	SLC38A1	-	ATG	14	ENST00000398637.9	ENST00000398637.9.1
376	chr12:56041949-56041973:+	chr12	56041950	56041973	ENSG00000197728.10	RPS26	+	ATG	7	ENST00000356464.10	ENST00000356464.10.1
377	chr12:56216458-56216524:-	chr12	56216459	56216524	ENSG00000181852.17	RNF41	-	ATG	21	ENST00000345093.8	ENST00000345093.8.2
378	chr12:57755187-57755280:+	chr12	57755188	57755280	ENSG00000139266.5	MARCH9	+	ATG	30	ENST00000266643.5	ENST00000266643.5.1
379	chr12:68808246-68808291:+	chr12	68808247	68808291	ENSG00000135679.23	MDM2	+	ATG	14	ENST00000258149.9	ENST00000258149.9.1
380	chr12:89656025-89656094:-	chr12	89656026	89656094	ENSG00000070961.15	ATP2B1	-	ATG	22	ENST00000428670.7	ENST00000428670.7.1
381	chr12:100142604-100142811:-	chr12	100142605	100142811	ENSG00000111647.12	UHRF1BP1L	-	ATG	68	ENST00000279907.11	ENST00000279907.11.1
382	chr12:121400162-121400216:+	chr12	121400163	121400216	ENSG00000170633.16	RNF34	+	ATG	17	ENST00000392464.3	ENST00000392464.3.1
383	chr13:29850116-29850173:-	chr13	29850117	29850173	ENSG00000122042.9	UBL3	-	ATG	18	ENST00000380680.4	ENST00000380680.4.1
384	chr13:39601049-39601355:-	chr13	39601050	39601355	ENSG00000183722.7	LHFP	-	ATG	101	ENST00000379589.3	ENST00000379589.3.1
385	chr13:32522224-32538637:-	chr13	32522225	32538637	ENSG00000244754.8	N4BP2L2	-	ATG	46	ENST00000504114.5	ENST00000504114.5.1
386	chr13:41311220-41311412:+	chr13	41311221	41311412	ENSG00000172766.18	NAA16	+	ATG	63	ENST00000379406.7	ENST00000379406.7.1
387	chr13:106535381-106535444:-	chr13	106535382	106535444	ENSG00000125266.7	EFNB2	-	ATG	20	ENST00000646441.1	ENST00000646441.1.1
388	chr13:102799221-102799323:+	chr13	102799222	102799323	ENSG00000134897.13	BIVM	+	ATG	33	ENST00000257336.5	ENST00000257336.5.1
389	chr14:57268708-57268816:-	chr14	57268709	57268816	ENSG00000070367.15	EXOC5	-	ATG	35	ENST00000621441.4	ENST00000621441.4.2
390	chr14:99971814-99971874:+	chr14	99971815	99971874	ENSG00000196405.12	EVL	+	ATG	19	ENST00000402714.6	ENST00000402714.6.1
391	chr15:52019250-52045844:+	chr15	52019251	52045844	ENSG00000069956.11	MAPK6	+	ATG	46	ENST00000261845.6	ENST00000261845.6.1
392	chr15:50648801-50686717:-	chr15	50648802	50686717	ENSG00000092439.14	TRPM7	-	ATG	129	ENST00000313478.11	ENST00000313478.11.1
393	chr15:66703084-66703195:+	chr15	66703085	66703195	ENSG00000137834.14	SMAD6	+	ATG	36	ENST00000288840.9	ENST00000288840.9.1
394	chr15:78123719-78131261:-	chr15	78123720	78131261	ENSG00000136425.13	CIB2	-	ATG	38	ENST00000258930.7	ENST00000258930.7.1
395	chr15:82875400-82952621:-	chr15	82875401	82952621	ENSG00000103942.12	HOMER2	-	ATG	83	ENST00000304231.12	ENST00000304231.12.1
396	chr15:81001988-81002279:+	chr15	81001989	81002279	ENSG00000140406.3	MESDC1	+	ATG	96	ENST00000267984.3	ENST00000267984.3.3
397	chr15:89247637-89247730:+	chr15	89247638	89247730	ENSG00000140525.17	FANCI	+	ATG	30	ENST00000300027.12	ENST00000300027.12.1
398	chr16:11668537-11676010:+	chr16	11668538	11676010	ENSG00000184602.5	SNN	+	ATG	12	ENST00000329565.5	ENST00000329565.5.1
399	chr16:25111843-25111894:+	chr16	25111844	25111894	ENSG00000205629.11	LCMT1	+	ATG	16	ENST00000399069.7	ENST00000399069.7.1
400	chr16:29862928-29863342:-	chr16	29862929	29863342	ENSG00000103502.13	CDIPT	-	ATG	137	ENST00000219789.10	ENST00000219789.10.1
401	chr16:29995981-29996272:+	chr16	29995982	29996272	ENSG00000169592.14	INO80E	+	ATG	96	ENST00000563197.5	ENST00000563197.5.1
402	chr16:30925868-30930145:+	chr16	30925869	30930145	ENSG00000099364.16	FBXL19	+	ATG	249	ENST00000471231.6	ENST00000471231.6.1
403	chr16:30762115-30762223:+	chr16	30762116	30762223	ENSG00000103549.21	RNF40	+	ATG	35	ENST00000324685.10	ENST00000324685.10.1
404	chr16:56451289-56451310:-	chr16	56451290	56451310	ENSG00000167005.13	NUDT21	-	ATG	6	ENST00000300291.9	ENST00000300291.9.1
405	chr16:58599326-58599386:-	chr16	58599327	58599386	ENSG00000125107.17	CNOT1	-	ATG	19	ENST00000317147.9	ENST00000317147.9.1
406	chr16:68266597-68274779:+	chr16	68266598	68274779	ENSG00000103064.13	SLC7A6	+	ATG	70	ENST00000219343.10	ENST00000219343.10.1
407	chr16:77191221-77193648:+	chr16	77191222	77193648	ENSG00000103111.14	MON1B	+	ATG	130	ENST00000248248.7	ENST00000248248.7.1
408	chr16:89418324-89490305:-	chr16	89418325	89490305	ENSG00000167522.15	ANKRD11	-	ATG	34	ENST00000301030.9	ENST00000301030.9.1
409	chr17:4999896-5000223:+	chr17	4999897	5000223	ENSG00000129250.11	KIF1C	+	ATG	25	ENST00000320785.9	ENST00000320785.9.1
410	chr17:14301317-14301407:+	chr17	14301318	14301407	ENSG00000125430.8	HS3ST3B1	+	ATG	29	ENST00000360954.2	ENST00000360954.2.1
411	chr17:19867473-19867560:-	chr17	19867474	19867560	ENSG00000083290.19	ULK2	-	ATG	28	ENST00000361658.6	ENST00000361658.6.1
412	chr17:35735123-35740485:+	chr17	35735124	35740485	ENSG00000270885.1	RASL10B	+	ATG	117	ENST00000603017.1	ENST00000603017.1.1
413	chr17:44324716-44324764:-	chr17	44324717	44324764	ENSG00000013306.15	SLC25A39	-	ATG	15	ENST00000225308.12	ENST00000225308.12.1
414	chr17:68248451-68248553:+	chr17	68248452	68248553	ENSG00000196704.11	AMZ2	+	ATG	33	ENST00000359904.7	ENST00000359904.7.1
415	chr17:76729705-76729792:+	chr17	76729706	76729792	ENSG00000181038.13	METTL23	+	ATG	28	ENST00000588783.5	ENST00000588783.5.1
416	chr17:78997819-78997939:-	chr17	78997820	78997939	ENSG00000171302.16	CANT1	-	ATG	39	ENST00000302345.6	ENST00000302345.6.1
417	chr17:81893566-81893587:+	chr17	81893567	81893587	ENSG00000141552.17	ANAPC11	+	ATG	6	ENST00000571570.5	ENST00000571570.5.1
418	chr18:10454632-10454866:+	chr18	10454633	10454866	ENSG00000154856.12	APCDD1	+	ATG	77	ENST00000355285.9	ENST00000355285.9.1
419	chr18:26226826-26226922:+	chr18	26226827	26226922	ENSG00000141384.12	TAF4B	+	ATG	31	ENST00000269142.9	ENST00000269142.9.1
420	chr18:36129220-36129250:-	chr18	36129221	36129250	ENSG00000141424.12	SLC39A6	-	ATG	9	ENST00000269187.9	ENST00000269187.9.1
421	chr18:50663190-50663238:+	chr18	50663191	50663238	ENSG00000141639.11	MAPK4	+	ATG	15	ENST00000400384.6	ENST00000400384.6.1
422	chr18:74148596-74148623:+	chr18	74148597	74148623	ENSG00000075336.11	TIMM21	+	ATG	8	ENST00000169551.10	ENST00000169551.10.1
423	chr19:35937227-35937341:+	chr19	35937228	35937341	ENSG00000126243.8	LRFN3	+	ATG	37	ENST00000588831.5	ENST00000588831.5.1
424	chr19:36115085-36115211:-	chr19	36115086	36115211	ENSG00000105258.8	POLR2I	-	ATG	41	ENST00000221859.8	ENST00000221859.8.2
425	chr19:38893847-38899521:-	chr19	38893848	38899521	ENSG00000068903.19	SIRT2	-	ATG	11	ENST00000392081.6	ENST00000392081.6.1
426	chr19:38081398-38081497:+	chr19	38081399	38081497	ENSG00000105738.10	SIPA1L3	+	ATG	32	ENST00000222345.10	ENST00000222345.10.1
427	chr19:39831874-39834198:-	chr19	39831875	39834198	ENSG00000105204.13	DYRK1B	-	ATG	89	ENST00000323039.9	ENST00000323039.9.1
428	chr19:42325917-42325989:+	chr19	42325918	42325989	ENSG00000105429.12	MEGF8	+	ATG	23	ENST00000334370.8	ENST00000334370.8.1
429	chr19:47352776-47352818:+	chr19	47352777	47352818	ENSG00000134815.18	DHX34	+	ATG	13	ENST00000328771.8	ENST00000328771.8.1
430	chr19:50507676-50511158:-	chr19	50507677	50511158	ENSG00000161677.11	JOSD2	-	ATG	75	ENST00000598418.5	ENST00000598418.5.1
431	chr19:49877134-49877185:-	chr19	49877135	49877185	ENSG00000204673.10	AKT1S1	-	ATG	16	ENST00000391835.1	ENST00000391835.1.1
432	chr20:408240-408705:+	chr20	408241	408705	ENSG00000125826.20	RBCK1	+	ATG	154	ENST00000356286.9	ENST00000356286.9.1
433	chr20:3854587-3854638:+	chr20	3854588	3854638	ENSG00000088888.17	MAVS	+	ATG	16	ENST00000428216.3	ENST00000428216.3.1
434	chr20:6768277-6768589:+	chr20	6768278	6768589	ENSG00000125845.6	BMP2	+	ATG	103	ENST00000378827.4	ENST00000378827.4.1
435	chr20:6768191-6768278:+	chr20	6768192	6768278	ENSG00000125845.6	BMP2	+	ATG	28	ENST00000378827.4	ENST00000378827.4.2
436	chr20:32743437-32743716:-	chr20	32743438	32743716	ENSG00000149600.11	COMMD7	-	ATG	92	ENST00000278980.10	ENST00000278980.10.1
437	chr21:31731896-31731953:-	chr21	31731897	31731953	ENSG00000156304.14	SCAF4	-	ATG	18	ENST00000399804.5	ENST00000399804.5.1
438	chr21:46636502-46636913:+	chr21	46636503	46636913	ENSG00000160310.17	PRMT2	+	ATG	20	ENST00000355680.7	ENST00000355680.7.2
439	chr22:18078019-18078348:+	chr22	18078020	18078348	ENSG00000215193.12	PEX26	+	ATG	26	ENST00000329627.11	ENST00000329627.11.1
440	chr22:24035476-24035515:+	chr22	24035477	24035515	ENSG00000099991.17	CABIN1	+	ATG	12	ENST00000263119.9	ENST00000263119.9.1
441	chr22:24548046-24555016:-	chr22	24548047	24555016	ENSG00000138867.16	GUCD1	-	ATG	59	ENST00000435822.5	ENST00000435822.5.1
442	chr22:29603841-29603943:+	chr22	29603842	29603943	ENSG00000186575.17	NF2	+	ATG	33	ENST00000338641.8	ENST00000338641.8.1
443	chr22:37608501-37608630:+	chr22	37608502	37608630	ENSG00000100083.18	GGA1	+	ATG	42	ENST00000343632.8	ENST00000343632.8.1
444	chr22:39520746-39521528:+	chr22	39520747	39521528	ENSG00000128272.14	ATF4	+	ATG	59	ENST00000404241.6	ENST00000404241.6.1
445	chr22:38700353-38700404:-	chr22	38700354	38700404	ENSG00000100221.10	JOSD1	-	ATG	16	ENST00000216039.9	ENST00000216039.9.1
446	chr22:41544136-41544262:-	chr22	41544137	41544262	ENSG00000100413.16	POLR3H	-	ATG	41	ENST00000355209.8	ENST00000355209.8.1
447	chr22:49913704-49913842:-	chr22	49913705	49913842	ENSG00000182858.13	ALG12	-	ATG	45	ENST00000330817.10	ENST00000330817.10.1
448	chr22:50343432-50372117:+	chr22	50343433	50372117	ENSG00000100239.15	PPP6R2	+	ATG	71	ENST00000359139.7	ENST00000359139.7.1
449	chrX:24054923-24054947:+	chrX	24054924	24054947	ENSG00000130741.10	EIF2S3	+	ATG	7	ENST00000253039.8	ENST00000253039.8.1
450	chrX:134796810-134796933:-	chrX	134796811	134796933	ENSG00000156504.16	FAM122B	-	ATG	40	ENST00000370790.5	ENST00000370790.5.1
451	chrX:135973623-135973947:-	chrX	135973624	135973947	ENSG00000169446.5	MMGT1	-	ATG	107	ENST00000305963.2	ENST00000305963.2.1
452	chrX:154092264-154097665:-	chrX	154092265	154097665	ENSG00000169057.21	MECP2	-	ATG	34	ENST00000303391.10	ENST00000303391.10.1
453	chr1:11980455-11980482:+	chr1	11980456	11980482	ENSG00000116688.16	MFN2	+	ATG	8	ENST00000235329.9	ENST00000235329.9.2
454	chr1:16608532-16608640:-	chr1	16608533	16608640	ENSG00000219481.10	NBPF1	-	ATG	35	ENST00000430580.6	ENST00000430580.6.1
455	chr1:25338328-25338385:+	chr1	25338329	25338385	ENSG00000183726.10	TMEM50A	+	ATG	18	ENST00000374358.4	ENST00000374358.4.1
456	chr1:26952288-26952387:-	chr1	26952289	26952387	ENSG00000175707.8	KDF1	-	ATG	32	ENST00000320567.5	ENST00000320567.5.1
457	chr1:28516732-28516795:+	chr1	28516733	28516795	ENSG00000180198.15	RCC1	+	ATG	20	ENST00000373833.10	ENST00000373833.10.1
458	chr1:41186178-41186250:-	chr1	41186179	41186250	ENSG00000010803.16	SCMH1	-	ATG	23	ENST00000372596.5	ENST00000372596.5.1
459	chr1:43531062-43538253:+	chr1	43531063	43538253	ENSG00000142949.16	PTPRF	+	ATG	27	ENST00000359947.8	ENST00000359947.8.1
460	chr1:43707549-43736241:+	chr1	43707550	43736241	ENSG00000126091.20	ST3GAL3	+	ATG	50	ENST00000347631.7	ENST00000347631.7.1
461	chr1:50969470-50969611:+	chr1	50969471	50969611	ENSG00000123080.10	CDKN2C	+	ATG	46	ENST00000262662.5	ENST00000262662.5.2
462	chr1:50969823-50970365:+	chr1	50969824	50970365	ENSG00000123080.10	CDKN2C	+	ATG	27	ENST00000262662.5	ENST00000262662.5.3
463	chr1:50968728-50968788:+	chr1	50968729	50968788	ENSG00000123080.10	CDKN2C	+	ATG	19	ENST00000262662.5	ENST00000262662.5.4
464	chr1:51236326-51236431:+	chr1	51236327	51236431	ENSG00000123091.4	RNF11	+	ATG	34	ENST00000242719.3	ENST00000242719.3.1
465	chr1:45660611-45660635:-	chr1	45660612	45660635	ENSG00000159592.10	GPBP1L1	-	ATG	7	ENST00000290795.7	ENST00000290795.7.1
466	chr1:51519203-51519245:-	chr1	51519204	51519245	ENSG00000085832.16	EPS15	-	ATG	13	ENST00000371733.7	ENST00000371733.7.1
467	chr1:53946094-53946448:+	chr1	53946095	53946448	ENSG00000116212.14	LRRC42	+	ATG	117	ENST00000371370.7	ENST00000371370.7.1
468	chr1:68497006-68497027:-	chr1	68497007	68497027	ENSG00000024526.16	DEPDC1	-	ATG	6	ENST00000370966.9	ENST00000370966.9.1
469	chr1:70354487-70354559:-	chr1	70354488	70354559	ENSG00000118454.12	ANKRD13C	-	ATG	23	ENST00000370944.8	ENST00000370944.8.1
470	chr1:74733207-74733324:+	chr1	74733208	74733324	ENSG00000162623.15	TYW3	+	ATG	38	ENST00000370867.7	ENST00000370867.7.1
471	chr1:75724531-75724627:+	chr1	75724532	75724627	ENSG00000117054.13	ACADM	+	ATG	31	ENST00000370841.8	ENST00000370841.8.1
472	chr1:77641540-77641579:-	chr1	77641541	77641579	ENSG00000036549.12	ZZZ3	-	ATG	12	ENST00000370798.5	ENST00000370798.5.1
473	chr1:93079495-93079522:+	chr1	93079496	93079522	ENSG00000143033.17	MTF2	+	ATG	8	ENST00000370298.8	ENST00000370298.8.1
474	chr1:100894689-100894770:-	chr1	100894690	100894770	ENSG00000162694.13	EXTL2	-	ATG	26	ENST00000370114.7	ENST00000370114.7.1
475	chr1:100895425-100895641:-	chr1	100895426	100895641	ENSG00000162694.13	EXTL2	-	ATG	71	ENST00000370114.7	ENST00000370114.7.2
476	chr1:93346149-93346221:+	chr1	93346150	93346221	ENSG00000117505.12	DR1	+	ATG	23	ENST00000370272.8	ENST00000370272.8.1
477	chr1:111137545-111137566:-	chr1	111137546	111137566	ENSG00000156171.14	DRAM2	-	ATG	6	ENST00000286692.8	ENST00000286692.8.1
478	chr1:112619719-112619776:+	chr1	112619720	112619776	ENSG00000116489.12	CAPZA1	+	ATG	18	ENST00000263168.3	ENST00000263168.3.2
479	chr1:113073279-113073339:+	chr1	113073280	113073339	ENSG00000198799.11	LRIG2	+	ATG	19	ENST00000361127.5	ENST00000361127.5.1
480	chr1:117367849-117367906:+	chr1	117367850	117367906	ENSG00000198162.12	MAN1A2	+	ATG	18	ENST00000356554.7	ENST00000356554.7.1
481	chr1:117920401-117929466:-	chr1	117920402	117929466	ENSG00000196505.10	GDAP2	-	ATG	13	ENST00000369443.9	ENST00000369443.9.1
482	chr1:116666531-116666588:-	chr1	116666532	116666588	ENSG00000143061.17	IGSF3	-	ATG	18	ENST00000369486.7	ENST00000369486.7.1
483	chr1:147611589-147611796:+	chr1	147611590	147611796	ENSG00000116128.10	BCL9	+	ATG	68	ENST00000234739.7	ENST00000234739.7.1
484	chr1:119711901-119711946:+	chr1	119711902	119711946	ENSG00000092621.12	PHGDH	+	ATG	14	ENST00000641597.1	ENST00000641597.1.1
485	chr1:151006571-151006697:-	chr1	151006572	151006697	ENSG00000143409.15	FAM63A	-	ATG	41	ENST00000361936.9	ENST00000361936.9.1
486	chr1:151055968-151059495:-	chr1	151055969	151059495	ENSG00000197622.12	CDC42SE1	-	ATG	13	ENST00000439374.6	ENST00000439374.6.1
487	chr1:151165572-151165629:-	chr1	151165573	151165629	ENSG00000163155.11	LYSMD1	-	ATG	18	ENST00000368908.9	ENST00000368908.9.1
488	chr1:154220521-154220560:-	chr1	154220522	154220560	ENSG00000143612.19	C1orf43	-	ATG	12	ENST00000350592.7	ENST00000350592.7.1
489	chr1:154602508-154602583:-	chr1	154602509	154602583	ENSG00000160710.15	ADAR	-	ATG	24	ENST00000368471.7	ENST00000368471.7.1
490	chr1:156282708-156282801:-	chr1	156282709	156282801	ENSG00000198952.8	SMG5	-	ATG	30	ENST00000361813.5	ENST00000361813.5.1
491	chr1:156601410-156601467:-	chr1	156601411	156601467	ENSG00000160818.16	GPATCH4	-	ATG	18	ENST00000368232.8	ENST00000368232.8.1
492	chr1:156727994-156728312:-	chr1	156727995	156728312	ENSG00000143319.16	ISG20L2	-	ATG	105	ENST00000313146.10	ENST00000313146.10.1
493	chr1:156727802-156727976:-	chr1	156727803	156727976	ENSG00000143319.16	ISG20L2	-	ATG	57	ENST00000313146.10	ENST00000313146.10.2
494	chr1:156727692-156727749:-	chr1	156727693	156727749	ENSG00000143319.16	ISG20L2	-	ATG	18	ENST00000313146.10	ENST00000313146.10.3
495	chr1:160031792-160031888:-	chr1	160031793	160031888	ENSG00000143315.7	PIGM	-	ATG	31	ENST00000368090.4	ENST00000368090.4.1
496	chr1:161045937-161045964:-	chr1	161045938	161045964	ENSG00000158773.14	USF1	-	ATG	8	ENST00000368021.7	ENST00000368021.7.1
497	chr1:161176439-161176505:-	chr1	161176440	161176505	ENSG00000158850.14	B4GALT3	-	ATG	21	ENST00000367998.5	ENST00000367998.5.1
498	chr1:169368247-169368280:+	chr1	169368248	169368280	ENSG00000117475.13	BLZF1	+	ATG	10	ENST00000329281.6	ENST00000329281.6.1
499	chr1:167936712-167936784:+	chr1	167936713	167936784	ENSG00000143164.15	DCAF6	+	ATG	23	ENST00000367843.7	ENST00000367843.7.1
500	chr1:178776686-178776710:+	chr1	178776687	178776710	ENSG00000116191.17	RALGPS2	+	ATG	7	ENST00000367635.7	ENST00000367635.7.1
501	chr1:174999604-174999652:+	chr1	174999605	174999652	ENSG00000116161.17	CACYBP	+	ATG	15	ENST00000613570.4	ENST00000613570.4.1
502	chr1:184477466-184477505:+	chr1	184477467	184477505	ENSG00000116667.12	C1orf21	+	ATG	12	ENST00000235307.6	ENST00000235307.6.1
503	chr1:185045496-185087593:+	chr1	185045497	185087593	ENSG00000121481.10	RNF2	+	ATG	64	ENST00000367510.7	ENST00000367510.7.1
504	chr1:203802307-203802565:+	chr1	203802308	203802565	ENSG00000058673.16	ZC3H11A	+	ATG	85	ENST00000639812.1	ENST00000639812.1.2
505	chr1:206612388-206612442:-	chr1	206612389	206612442	ENSG00000143486.15	EIF2D	-	ATG	17	ENST00000367114.7	ENST00000367114.7.1
506	chr1:205811032-205812896:-	chr1	205811033	205812896	ENSG00000133065.10	SLC41A1	-	ATG	47	ENST00000367137.3	ENST00000367137.3.1
507	chr1:213015723-213015804:-	chr1	213015724	213015804	ENSG00000174606.13	ANGEL2	-	ATG	26	ENST00000360506.6	ENST00000360506.6.1
508	chr1:222712779-222712845:+	chr1	222712780	222712845	ENSG00000162819.11	BROX	+	ATG	21	ENST00000340934.9	ENST00000340934.9.2
509	chr1:220046413-220046560:-	chr1	220046414	220046560	ENSG00000136628.17	EPRS	-	ATG	48	ENST00000366923.7	ENST00000366923.7.1
510	chr1:226871352-226871379:+	chr1	226871353	226871379	ENSG00000143801.16	PSEN2	+	ATG	8	ENST00000366783.7	ENST00000366783.7.1
511	chr1:227317542-227317677:-	chr1	227317543	227317677	ENSG00000143776.18	CDC42BPA	-	ATG	44	ENST00000366769.7	ENST00000366769.7.1
512	chr1:227318016-227318043:-	chr1	227318017	227318043	ENSG00000143776.18	CDC42BPA	-	ATG	8	ENST00000366769.7	ENST00000366769.7.2
513	chr1:227317866-227317920:-	chr1	227317867	227317920	ENSG00000143776.18	CDC42BPA	-	ATG	17	ENST00000366769.7	ENST00000366769.7.3
514	chr1:241848754-241848802:+	chr1	241848755	241848802	ENSG00000174371.16	EXO1	+	ATG	15	ENST00000366548.7	ENST00000366548.7.3
515	chr1:248825092-248825269:-	chr1	248825093	248825269	ENSG00000175137.10	SH3BP5L	-	ATG	58	ENST00000366472.5	ENST00000366472.5.1
516	chr2:3377738-3377789:-	chr2	3377739	3377789	ENSG00000032389.12	TSSC1	-	ATG	16	ENST00000382125.8	ENST00000382125.8.1
517	chr2:6940973-6941051:+	chr2	6940974	6941051	ENSG00000151692.14	RNF144A	+	ATG	25	ENST00000320892.10	ENST00000320892.10.1
518	chr2:27052939-27053002:+	chr2	27052940	27053002	ENSG00000084693.15	AGBL5	+	ATG	20	ENST00000360131.4	ENST00000360131.4.1
519	chr2:27370638-27370668:+	chr2	27370639	27370668	ENSG00000115234.10	SNX17	+	ATG	9	ENST00000233575.6	ENST00000233575.6.1
520	chr2:32063803-32063971:+	chr2	32063804	32063971	ENSG00000021574.12	SPAST	+	ATG	55	ENST00000315285.8	ENST00000315285.8.1
521	chr2:38665975-38666032:+	chr2	38665976	38666032	ENSG00000143891.16	GALM	+	ATG	18	ENST00000272252.9	ENST00000272252.9.1
522	chr2:38880599-38880650:+	chr2	38880600	38880650	ENSG00000188010.13	MORN2	+	ATG	16	ENST00000409077.2	ENST00000409077.2.1
523	chr2:37317028-37317127:-	chr2	37317029	37317127	ENSG00000115825.9	PRKD3	-	ATG	32	ENST00000379066.5	ENST00000379066.5.2
524	chr2:61145127-61162862:+	chr2	61145128	61162862	ENSG00000237651.6	C2orf74	+	ATG	29	ENST00000426997.5	ENST00000426997.5.1
525	chr2:64653757-64653796:-	chr2	64653758	64653796	ENSG00000179833.4	SERTAD2	-	ATG	12	ENST00000313349.3	ENST00000313349.3.1
526	chr2:65056477-65069398:+	chr2	65056478	65069398	ENSG00000011523.13	CEP68	+	ATG	16	ENST00000377990.6	ENST00000377990.6.1
527	chr2:69829838-69829871:+	chr2	69829839	69829871	ENSG00000087338.4	GMCL1	+	ATG	10	ENST00000282570.3	ENST00000282570.3.1
528	chr2:69829738-69829798:+	chr2	69829739	69829798	ENSG00000087338.4	GMCL1	+	ATG	19	ENST00000282570.3	ENST00000282570.3.2
529	chr2:71130467-71130572:+	chr2	71130468	71130572	ENSG00000124383.8	MPHOSPH10	+	ATG	34	ENST00000244230.6	ENST00000244230.6.1
530	chr2:74529639-74529783:-	chr2	74529640	74529783	ENSG00000115307.16	AUP1	-	ATG	47	ENST00000377526.3	ENST00000377526.3.1
531	chr2:74458483-74458594:+	chr2	74458484	74458594	ENSG00000239779.6	WBP1	+	ATG	36	ENST00000233615.6	ENST00000233615.6.1
532	chr2:102762608-102764388:+	chr2	102762609	102764388	ENSG00000170417.15	TMEM182	+	ATG	45	ENST00000640575.1	ENST00000640575.1.1
533	chr2:112645944-112645989:+	chr2	112645945	112645989	ENSG00000144136.10	SLC20A1	+	ATG	14	ENST00000272542.7	ENST00000272542.7.2
534	chr2:111883960-111884068:-	chr2	111883961	111884068	ENSG00000153107.12	ANAPC1	-	ATG	35	ENST00000341068.7	ENST00000341068.7.1
535	chr2:119760212-119760281:+	chr2	119760213	119760281	ENSG00000088179.8	PTPN4	+	ATG	22	ENST00000263708.6	ENST00000263708.6.1
536	chr2:135531529-135531628:+	chr2	135531530	135531628	ENSG00000048991.16	R3HDM1	+	ATG	32	ENST00000409478.5	ENST00000409478.5.1
537	chr2:151828232-151828403:-	chr2	151828233	151828403	ENSG00000162980.16	ARL5A	-	ATG	56	ENST00000295087.12	ENST00000295087.12.1
538	chr2:152175695-152175872:-	chr2	152175696	152175872	ENSG00000115145.9	STAM2	-	ATG	58	ENST00000263904.4	ENST00000263904.4.1
539	chr2:161179642-161179744:+	chr2	161179643	161179744	ENSG00000136560.13	TANK	+	ATG	33	ENST00000259075.6	ENST00000259075.6.1
540	chr2:201129778-201129853:+	chr2	201129779	201129853	ENSG00000003402.19	CFLAR	+	ATG	24	ENST00000309955.7	ENST00000309955.7.1
541	chr2:202377209-202377284:+	chr2	202377210	202377284	ENSG00000204217.13	BMPR2	+	ATG	24	ENST00000374580.8	ENST00000374580.8.1
542	chr2:203016277-203016331:+	chr2	203016278	203016331	ENSG00000144426.18	NBEAL1	+	ATG	17	ENST00000449802.5	ENST00000449802.5.1
543	chr2:218658797-218659398:-	chr2	218658798	218659398	ENSG00000115568.15	ZNF142	-	ATG	54	ENST00000449707.5	ENST00000449707.5.1
544	chr2:230068580-230068676:-	chr2	230068581	230068676	ENSG00000163053.10	SLC16A14	-	ATG	31	ENST00000295190.8	ENST00000295190.8.1
545	chr2:234952159-234995351:+	chr2	234952160	234995351	ENSG00000130147.15	SH3BP4	+	ATG	19	ENST00000392011.6	ENST00000392011.6.1
546	chr2:240586889-240589377:+	chr2	240586890	240589377	ENSG00000142330.19	CAPN10	+	ATG	65	ENST00000270364.11	ENST00000270364.11.1
547	chr2:241687288-241687420:+	chr2	241687289	241687420	ENSG00000168395.15	ING5	+	ATG	43	ENST00000636051.1	ENST00000636051.1.1
548	chr3:9649540-9649564:+	chr3	9649541	9649564	ENSG00000163719.19	MTMR14	+	ATG	7	ENST00000353332.9	ENST00000353332.9.1
549	chr3:9792726-9792798:+	chr3	9792727	9792798	ENSG00000241553.12	ARPC4	+	ATG	23	ENST00000397261.7	ENST00000397261.7.1
550	chr3:12664058-12664088:-	chr3	12664059	12664088	ENSG00000132155.11	RAF1	-	ATG	9	ENST00000251849.8	ENST00000251849.8.2
551	chr3:10248423-10248819:+	chr3	10248424	10248819	ENSG00000157014.10	TATDN2	+	ATG	131	ENST00000287652.8	ENST00000287652.8.1
552	chr3:10249041-10249366:+	chr3	10249042	10249366	ENSG00000157014.10	TATDN2	+	ATG	65	ENST00000287652.8	ENST00000287652.8.2
553	chr3:14122006-14124676:-	chr3	14122007	14124676	ENSG00000163528.12	CHCHD4	-	ATG	33	ENST00000295767.9	ENST00000295767.9.1
554	chr3:39383449-39383491:+	chr3	39383450	39383491	ENSG00000144659.11	SLC25A38	+	ATG	13	ENST00000273158.9	ENST00000273158.9.1
555	chr3:38453968-38454130:+	chr3	38453969	38454130	ENSG00000114739.13	ACVR2B	+	ATG	53	ENST00000352511.4	ENST00000352511.4.1
556	chr3:40525110-40525785:+	chr3	40525111	40525785	ENSG00000172888.11	ZNF621	+	ATG	56	ENST00000339296.9	ENST00000339296.9.1
557	chr3:44959432-44976117:-	chr3	44959433	44976117	ENSG00000163812.13	ZDHHC3	-	ATG	70	ENST00000296127.7	ENST00000296127.7.1
558	chr3:52409874-52410099:-	chr3	52409875	52410099	ENSG00000163930.9	BAP1	-	ATG	74	ENST00000460680.5	ENST00000460680.5.1
559	chr3:87227522-87245727:+	chr3	87227523	87245727	ENSG00000083937.8	CHMP2B	+	ATG	15	ENST00000471660.5	ENST00000471660.5.1
560	chr3:66221015-66221072:+	chr3	66221016	66221072	ENSG00000144741.17	SLC25A26	+	ATG	18	ENST00000354883.10	ENST00000354883.10.1
561	chr3:100400935-100401118:-	chr3	100400936	100401118	ENSG00000154174.7	TOMM70	-	ATG	60	ENST00000284320.5	ENST00000284320.5.1
562	chr3:120094068-120094176:-	chr3	120094069	120094176	ENSG00000082701.14	GSK3B	-	ATG	35	ENST00000264235.12	ENST00000264235.12.1
563	chr3:129439765-129440011:-	chr3	129439766	129440011	ENSG00000129071.9	MBD4	-	ATG	81	ENST00000429544.6	ENST00000429544.6.1
564	chr3:150408669-150408696:+	chr3	150408670	150408696	ENSG00000196428.12	TSC22D2	+	ATG	8	ENST00000361875.7	ENST00000361875.7.1
565	chr3:156674661-156674706:+	chr3	156674662	156674706	ENSG00000163659.12	TIPARP	+	ATG	14	ENST00000295924.11	ENST00000295924.11.1
566	chr3:167720157-167720211:-	chr3	167720158	167720211	ENSG00000114209.14	PDCD10	-	ATG	17	ENST00000392750.6	ENST00000392750.6.1
567	chr3:168095442-168095559:-	chr3	168095443	168095559	ENSG00000173905.8	GOLIM4	-	ATG	38	ENST00000470487.5	ENST00000470487.5.1
568	chr3:171460320-171460395:-	chr3	171460321	171460395	ENSG00000154310.16	TNIK	-	ATG	24	ENST00000436636.6	ENST00000436636.6.1
569	chr3:180988213-180989646:-	chr3	180988214	180989646	ENSG00000205981.7	DNAJC19	-	ATG	20	ENST00000382564.7	ENST00000382564.7.1
570	chr3:183269702-183269780:+	chr3	183269703	183269780	ENSG00000176597.11	B3GNT5	+	ATG	25	ENST00000326505.3	ENST00000326505.3.1
571	chr3:183643531-183650341:+	chr3	183643532	183650341	ENSG00000114796.15	KLHL24	+	ATG	18	ENST00000454652.6	ENST00000454652.6.1
572	chr3:184315496-184315800:+	chr3	184315497	184315800	ENSG00000114867.20	EIF4G1	+	ATG	28	ENST00000346169.6	ENST00000346169.6.1
573	chr3:196503293-196503395:-	chr3	196503294	196503395	ENSG00000163961.4	RNF168	-	ATG	33	ENST00000318037.3	ENST00000318037.3.2
574	chr3:196708680-196711953:-	chr3	196708681	196711953	ENSG00000174007.7	CEP19	-	ATG	23	ENST00000409690.3	ENST00000409690.3.1
575	chr4:1721083-1721245:-	chr4	1721084	1721245	ENSG00000168936.10	TMEM129	-	ATG	53	ENST00000303277.6	ENST00000303277.6.1
576	chr4:4248010-4248202:-	chr4	4248011	4248202	ENSG00000132406.11	TMEM128	-	ATG	63	ENST00000254742.6	ENST00000254742.6.1
577	chr4:15686305-15686362:+	chr4	15686306	15686362	ENSG00000237765.6	FAM200B	+	ATG	18	ENST00000422728.2	ENST00000422728.2.1
578	chr4:25026924-25030859:-	chr4	25026925	25030859	ENSG00000153012.11	LGI2	-	ATG	149	ENST00000382114.8	ENST00000382114.8.1
579	chr4:39976607-39977467:-	chr4	39976608	39977467	ENSG00000121892.14	PDS5A	-	ATG	6	ENST00000303538.12	ENST00000303538.12.1
580	chr4:56907926-56908046:+	chr4	56907927	56908046	ENSG00000084093.16	REST	+	ATG	39	ENST00000309042.11	ENST00000309042.11.1
581	chr4:80266711-80266828:+	chr4	80266712	80266828	ENSG00000138675.16	FGF5	+	ATG	38	ENST00000456523.3	ENST00000456523.3.1
582	chr4:86594599-86594764:+	chr4	86594600	86594764	ENSG00000163629.12	PTPN13	+	ATG	54	ENST00000427191.6	ENST00000427191.6.1
583	chr4:86594355-86594451:+	chr4	86594356	86594451	ENSG00000163629.12	PTPN13	+	ATG	31	ENST00000427191.6	ENST00000427191.6.2
584	chr4:103076263-103076299:-	chr4	103076264	103076299	ENSG00000164038.14	SLC9B2	-	ATG	11	ENST00000362026.7	ENST00000362026.7.1
585	chr4:112232017-112232161:+	chr4	112232018	112232161	ENSG00000138660.11	AP1AR	+	ATG	47	ENST00000274000.9	ENST00000274000.9.1
586	chr4:112231822-112231903:+	chr4	112231823	112231903	ENSG00000138660.11	AP1AR	+	ATG	26	ENST00000274000.9	ENST00000274000.9.2
587	chr4:129093185-129093236:-	chr4	129093186	129093236	ENSG00000151466.11	SCLT1	-	ATG	16	ENST00000281142.9	ENST00000281142.9.1
588	chr4:127880936-127881026:+	chr4	127880937	127881026	ENSG00000142731.10	PLK4	+	ATG	29	ENST00000270861.9	ENST00000270861.9.1
589	chr4:174283857-174284253:-	chr4	174283858	174284253	ENSG00000164117.13	FBXO8	-	ATG	131	ENST00000393674.6	ENST00000393674.6.1
590	chr4:169621000-169635939:+	chr4	169621001	169635939	ENSG00000109572.13	CLCN3	+	ATG	29	ENST00000513761.5	ENST00000513761.5.1
591	chr5:14871634-14871766:-	chr5	14871635	14871766	ENSG00000154122.13	ANKH	-	ATG	43	ENST00000284268.7	ENST00000284268.7.1
592	chr5:16935893-16935944:-	chr5	16935894	16935944	ENSG00000145555.14	MYO10	-	ATG	16	ENST00000513610.5	ENST00000513610.5.1
593	chr5:31529078-31530812:-	chr5	31529079	31530812	ENSG00000113360.16	DROSHA	-	ATG	13	ENST00000511367.6	ENST00000511367.6.1
594	chr5:31530855-31530891:-	chr5	31530856	31530891	ENSG00000113360.16	DROSHA	-	ATG	11	ENST00000511367.6	ENST00000511367.6.2
595	chr5:32174130-32174184:-	chr5	32174131	32174184	ENSG00000113384.13	GOLPH3	-	ATG	17	ENST00000265070.6	ENST00000265070.6.1
596	chr5:52788060-52788153:+	chr5	52788061	52788153	ENSG00000213949.8	ITGA1	+	ATG	30	ENST00000282588.6	ENST00000282588.6.1
597	chr5:65988635-65992716:+	chr5	65988636	65992716	ENSG00000112851.14	ERBIN	+	ATG	17	ENST00000284037.9	ENST00000284037.9.1
598	chr5:74763680-74766944:-	chr5	74763681	74766944	ENSG00000164347.17	GFM2	-	ATG	30	ENST00000296805.7	ENST00000296805.7.1
599	chr5:77087114-77087249:-	chr5	77087115	77087249	ENSG00000132846.5	ZBED3	-	ATG	44	ENST00000255198.2	ENST00000255198.2.2
600	chr5:79512921-79512990:-	chr5	79512922	79512990	ENSG00000152413.14	HOMER1	-	ATG	22	ENST00000334082.10	ENST00000334082.10.1
601	chr5:102865829-102865907:+	chr5	102865830	102865907	ENSG00000145730.20	PAM	+	ATG	25	ENST00000438793.7	ENST00000438793.7.1
602	chr5:103120412-103129364:+	chr5	103120413	103129364	ENSG00000145725.19	PPIP5K2	+	ATG	44	ENST00000321521.13	ENST00000321521.13.1
603	chr5:116574364-116574397:-	chr5	116574365	116574397	ENSG00000092421.16	SEMA6A	-	ATG	10	ENST00000343348.10	ENST00000343348.10.1
604	chr5:136147886-136153598:+	chr5	136147887	136153598	ENSG00000113658.17	SMAD5	+	ATG	8	ENST00000545279.5	ENST00000545279.5.1
605	chr5:141476010-141476052:+	chr5	141476011	141476052	ENSG00000240184.6	PCDHGC3	+	ATG	13	ENST00000617641.4	ENST00000617641.4.1
606	chr5:141637040-141637283:+	chr5	141637041	141637283	ENSG00000164620.8	RELL2	+	ATG	80	ENST00000297164.7	ENST00000297164.7.1
607	chr5:141970807-141970828:+	chr5	141970808	141970828	ENSG00000013561.17	RNF14	+	ATG	6	ENST00000394520.6	ENST00000394520.6.1
608	chr5:173328563-173328977:-	chr5	173328564	173328977	ENSG00000113739.10	STC2	-	ATG	137	ENST00000265087.8	ENST00000265087.8.2
609	chr5:173329206-173329407:-	chr5	173329207	173329407	ENSG00000113739.10	STC2	-	ATG	66	ENST00000265087.8	ENST00000265087.8.3
610	chr5:179801905-179806626:-	chr5	179801906	179806626	ENSG00000161013.16	MGAT4B	-	ATG	67	ENST00000292591.11	ENST00000292591.11.1
611	chr5:180793078-180808685:-	chr5	180793079	180808685	ENSG00000131446.16	MGAT1	-	ATG	18	ENST00000333055.8	ENST00000333055.8.1
612	chr5:181223338-181223509:+	chr5	181223339	181223509	ENSG00000146063.19	TRIM41	+	ATG	56	ENST00000315073.9	ENST00000315073.9.1
613	chr6:16328341-16328431:-	chr6	16328342	16328431	ENSG00000124788.18	ATXN1	-	ATG	29	ENST00000244769.8	ENST00000244769.8.1
614	chr6:24720243-24720330:-	chr6	24720244	24720330	ENSG00000112308.12	C6orf62	-	ATG	28	ENST00000378119.8	ENST00000378119.8.3
615	chr6:28281798-28281843:+	chr6	28281799	28281843	ENSG00000137338.5	PGBD1	+	ATG	14	ENST00000259883.3	ENST00000259883.3.1
616	chr6:37354078-37354141:+	chr6	37354079	37354141	ENSG00000112130.16	RNF8	+	ATG	20	ENST00000373479.8	ENST00000373479.8.1
617	chr6:37697463-37697913:-	chr6	37697464	37697913	ENSG00000112139.14	MDGA1	-	ATG	149	ENST00000434837.7	ENST00000434837.7.1
618	chr6:43171590-43171626:+	chr6	43171591	43171626	ENSG00000112658.7	SRF	+	ATG	11	ENST00000265354.5	ENST00000265354.5.1
619	chr6:47309695-47309842:-	chr6	47309696	47309842	ENSG00000146072.6	TNFRSF21	-	ATG	48	ENST00000296861.2	ENST00000296861.2.1
620	chr6:63572553-63572688:+	chr6	63572554	63572688	ENSG00000112245.10	PTP4A1	+	ATG	44	ENST00000370651.5	ENST00000370651.5.2
621	chr6:82247567-82247627:-	chr6	82247568	82247627	ENSG00000005700.14	IBTK	-	ATG	19	ENST00000306270.11	ENST00000306270.11.1
622	chr6:99521074-99526107:+	chr6	99521075	99526107	ENSG00000228439.5	TSTD3	+	ATG	38	ENST00000452647.2	ENST00000452647.2.1
623	chr6:95577575-95586428:+	chr6	95577576	95586428	ENSG00000172469.15	MANEA	+	ATG	29	ENST00000358812.8	ENST00000358812.8.2
624	chr6:105161968-105161992:-	chr6	105161969	105161992	ENSG00000132429.9	POPDC3	-	ATG	7	ENST00000254765.3	ENST00000254765.3.1
625	chr6:106293079-106316208:-	chr6	106293080	106316208	ENSG00000057663.15	ATG5	-	ATG	44	ENST00000636437.1	ENST00000636437.1.1
626	chr6:98926881-98934770:-	chr6	98926882	98934770	ENSG00000112234.8	FBXL4	-	ATG	101	ENST00000369244.6	ENST00000369244.6.1
627	chr6:105133518-105137168:-	chr6	105133519	105137168	ENSG00000112276.13	BVES	-	ATG	89	ENST00000314641.9	ENST00000314641.9.1
628	chr6:109094387-109094471:-	chr6	109094388	109094471	ENSG00000080546.13	SESN1	-	ATG	27	ENST00000436639.6	ENST00000436639.6.1
629	chr6:125781179-125781245:+	chr6	125781180	125781245	ENSG00000111912.19	NCOA7	+	ATG	21	ENST00000368357.7	ENST00000368357.7.1
630	chr6:132814551-132814759:+	chr6	132814552	132814759	ENSG00000112306.7	RPS12	+	ATG	29	ENST00000230050.3	ENST00000230050.3.1
631	chr7:519355-519397:-	chr7	519356	519397	ENSG00000197461.13	PDGFA	-	ATG	13	ENST00000402802.7	ENST00000402802.7.1
632	chr7:30284931-30285066:+	chr7	30284932	30285066	ENSG00000180233.10	ZNRF2	+	ATG	44	ENST00000323037.4	ENST00000323037.4.1
633	chr7:43650550-43729464:-	chr7	43650551	43729464	ENSG00000106603.18	COA1	-	ATG	65	ENST00000310564.10	ENST00000310564.10.1
634	chr7:45109218-45111669:-	chr7	45109219	45111669	ENSG00000136270.13	TBRG4	-	ATG	24	ENST00000395655.8	ENST00000395655.8.1
635	chr7:50674628-50674655:-	chr7	50674629	50674655	ENSG00000106070.18	GRB10	-	ATG	8	ENST00000335866.7	ENST00000335866.7.1
636	chr7:91264690-91264888:+	chr7	91264691	91264888	ENSG00000157240.3	FZD1	+	ATG	65	ENST00000287934.3	ENST00000287934.3.1
637	chr7:87858731-87876195:-	chr7	87858732	87876195	ENSG00000075303.12	SLC25A40	-	ATG	62	ENST00000341119.9	ENST00000341119.9.1
638	chr7:98106981-98107083:+	chr7	98106982	98107083	ENSG00000164715.5	LMTK2	+	ATG	33	ENST00000297293.5	ENST00000297293.5.1
639	chr7:100478907-100478958:-	chr7	100478908	100478958	ENSG00000166925.8	TSC22D4	-	ATG	16	ENST00000300181.6	ENST00000300181.6.1
640	chr7:100612768-100612915:+	chr7	100612769	100612915	ENSG00000106330.11	MOSPD3	+	ATG	48	ENST00000223054.8	ENST00000223054.8.1
641	chr7:103029417-103074770:-	chr7	103029418	103074770	ENSG00000161040.16	FBXL13	-	ATG	59	ENST00000379305.7	ENST00000379305.7.1
642	chr7:150325942-150325969:+	chr7	150325943	150325969	ENSG00000127399.14	LRRC61	+	ATG	8	ENST00000359623.8	ENST00000359623.8.1
643	chr7:151080762-151080789:-	chr7	151080763	151080789	ENSG00000164896.19	FASTK	-	ATG	8	ENST00000482571.2	ENST00000482571.2.1
644	chr7:151082585-151083545:-	chr7	151082586	151083545	ENSG00000164897.12	TMUB1	-	ATG	39	ENST00000297533.8	ENST00000297533.8.1
645	chr7:156892999-156893047:-	chr7	156893000	156893047	ENSG00000105983.20	LMBR1	-	ATG	15	ENST00000353442.9	ENST00000353442.9.1
646	chr8:17245235-17246782:-	chr8	17245236	17246782	ENSG00000198791.11	CNOT7	-	ATG	39	ENST00000361272.8	ENST00000361272.8.1
647	chr8:17923003-17923036:+	chr8	17923004	17923036	ENSG00000078674.17	PCM1	+	ATG	10	ENST00000325083.12	ENST00000325083.12.1
648	chr8:28502707-28502737:+	chr8	28502708	28502737	ENSG00000104290.10	FZD3	+	ATG	9	ENST00000240093.7	ENST00000240093.7.1
649	chr8:38231803-38233065:+	chr8	38231804	38233065	ENSG00000085788.13	DDHD2	+	ATG	44	ENST00000397166.6	ENST00000397166.6.1
650	chr8:38457459-38457492:-	chr8	38457460	38457492	ENSG00000077782.19	FGFR1	-	ATG	10	ENST00000397091.9	ENST00000397091.9.1
651	chr8:41598860-41598998:+	chr8	41598861	41598998	ENSG00000158669.11	AGPAT6	+	ATG	45	ENST00000396987.7	ENST00000396987.7.1
652	chr8:42049150-42049237:-	chr8	42049151	42049237	ENSG00000083168.9	KAT6A	-	ATG	28	ENST00000406337.5	ENST00000406337.5.1
653	chr8:42049007-42049085:-	chr8	42049008	42049085	ENSG00000083168.9	KAT6A	-	ATG	25	ENST00000406337.5	ENST00000406337.5.2
654	chr8:69832821-69832989:-	chr8	69832822	69832989	ENSG00000137571.10	SLCO5A1	-	ATG	55	ENST00000260126.8	ENST00000260126.8.1
655	chr8:81713961-81714875:-	chr8	81713962	81714875	ENSG00000104231.10	ZFAND1	-	ATG	49	ENST00000523361.5	ENST00000523361.5.1
656	chr8:78516310-78516457:+	chr8	78516311	78516457	ENSG00000171033.12	PKIA	+	ATG	48	ENST00000396418.6	ENST00000396418.6.1
657	chr8:118111228-118111342:-	chr8	118111229	118111342	ENSG00000182197.10	EXT1	-	ATG	37	ENST00000378204.6	ENST00000378204.6.1
658	chr8:118111551-118111599:-	chr8	118111552	118111599	ENSG00000182197.10	EXT1	-	ATG	15	ENST00000378204.6	ENST00000378204.6.2
659	chr8:123256014-123256089:-	chr8	123256015	123256089	ENSG00000165156.14	ZHX1	-	ATG	24	ENST00000395571.7	ENST00000395571.7.1
660	chr8:126558093-126558195:-	chr8	126558094	126558195	ENSG00000168672.3	FAM84B	-	ATG	33	ENST00000304916.3	ENST00000304916.3.1
661	chr8:125083951-125084014:-	chr8	125083952	125084014	ENSG00000164961.15	WASHC5	-	ATG	20	ENST00000318410.11	ENST00000318410.11.1
662	chr8:144104624-144104747:+	chr8	144104625	144104747	ENSG00000179632.9	MAF1	+	ATG	40	ENST00000322428.9	ENST00000322428.9.1
663	chr8:144497082-144497316:+	chr8	144497083	144497316	ENSG00000160972.9	PPP1R16A	+	ATG	77	ENST00000292539.8	ENST00000292539.8.1
664	chr9:20622328-20622508:-	chr9	20622329	20622508	ENSG00000171843.15	MLLT3	-	ATG	59	ENST00000380338.8	ENST00000380338.8.1
665	chr9:22009006-22009084:-	chr9	22009007	22009084	ENSG00000147883.10	CDKN2B	-	ATG	25	ENST00000276925.6	ENST00000276925.6.1
666	chr9:34126411-34126504:-	chr9	34126412	34126504	ENSG00000198876.12	DCAF12	-	ATG	30	ENST00000361264.8	ENST00000361264.8.1
667	chr9:34336279-34338812:+	chr9	34336280	34338812	ENSG00000164978.17	NUDT2	+	ATG	53	ENST00000379158.6	ENST00000379158.6.1
668	chr9:32552341-32552386:+	chr9	32552342	32552386	ENSG00000235453.10	RP11-205M20.3	+	ATG	14	ENST00000451672.2	ENST00000451672.2.1
669	chr9:35605548-35605593:+	chr9	35605549	35605593	ENSG00000107140.15	TESK1	+	ATG	14	ENST00000336395.5	ENST00000336395.5.1
670	chr9:35748784-35748958:-	chr9	35748785	35748958	ENSG00000070610.14	GBA2	-	ATG	57	ENST00000378103.7	ENST00000378103.7.1
671	chr9:86947059-86947134:-	chr9	86947060	86947134	ENSG00000180447.6	GAS1	-	ATG	24	ENST00000298743.8	ENST00000298743.8.1
672	chr9:79572190-79572214:+	chr9	79572191	79572214	ENSG00000106829.18	TLE4	+	ATG	7	ENST00000376552.6	ENST00000376552.6.1
673	chr9:83980860-83999720:+	chr9	83980861	83999720	ENSG00000178966.16	RMI1	+	ATG	51	ENST00000325875.7	ENST00000325875.7.1
674	chr9:96776068-96777620:-	chr9	96776069	96777620	ENSG00000081386.12	ZNF510	-	ATG	71	ENST00000375231.5	ENST00000375231.5.2
675	chr9:98119090-98119192:-	chr9	98119091	98119192	ENSG00000106785.14	TRIM14	-	ATG	33	ENST00000375098.7	ENST00000375098.7.1
676	chr9:122264695-122264866:+	chr9	122264696	122264866	ENSG00000148187.17	MRRF	+	ATG	56	ENST00000344641.7	ENST00000344641.7.1
677	chr9:115118001-115118229:-	chr9	115118002	115118229	ENSG00000041982.15	TNC	-	ATG	75	ENST00000350763.8	ENST00000350763.8.1
678	chr9:128322700-128322745:+	chr9	128322701	128322745	ENSG00000167113.10	COQ4	+	ATG	14	ENST00000300452.7	ENST00000300452.7.1
679	chr9:130714089-130714203:+	chr9	130714090	130714203	ENSG00000097007.17	ABL1	+	ATG	37	ENST00000372348.6	ENST00000372348.6.1
680	chr9:130444942-130452317:+	chr9	130444943	130452317	ENSG00000130707.17	ASS1	+	ATG	48	ENST00000352480.9	ENST00000352480.9.1
681	chr9:134026524-134026620:+	chr9	134026525	134026620	ENSG00000235106.9	RP11-374P20.5	+	ATG	31	ENST00000603928.2	ENST00000603928.2.2
682	chr9:136944025-136944091:-	chr9	136944026	136944091	ENSG00000159069.13	FBXW5	-	ATG	21	ENST00000325285.7	ENST00000325285.7.1
683	chr9:136808119-136808155:+	chr9	136808120	136808155	ENSG00000196642.18	RABL6	+	ATG	11	ENST00000311502.11	ENST00000311502.11.1
684	chr9:137301965-137302118:-	chr9	137301966	137302118	ENSG00000198435.3	NRARP	-	ATG	50	ENST00000356628.3	ENST00000356628.3.1
685	chr10:6089166-6097053:+	chr10	6089167	6097053	ENSG00000134453.15	RBM17	+	ATG	10	ENST00000379888.8	ENST00000379888.8.1
686	chr10:5685114-5712857:+	chr10	5685115	5712857	ENSG00000108021.20	FAM208B	+	ATG	31	ENST00000328090.9	ENST00000328090.9.1
687	chr10:15860286-15860352:-	chr10	15860287	15860352	ENSG00000148481.13	FAM188A	-	ATG	21	ENST00000277632.7	ENST00000277632.7.1
688	chr10:21497042-21497138:-	chr10	21497043	21497138	ENSG00000204682.5	CASC10	-	ATG	31	ENST00000377113.5	ENST00000377113.5.1
689	chr10:30437365-30438964:+	chr10	30437366	30438964	ENSG00000107968.9	MAP3K8	+	ATG	29	ENST00000263056.5	ENST00000263056.5.1
690	chr10:28532786-28532897:+	chr10	28532787	28532897	ENSG00000095787.21	WAC	+	ATG	36	ENST00000375664.8	ENST00000375664.8.2
691	chr10:43644788-43646185:-	chr10	43644789	43646185	ENSG00000169740.13	ZNF32	-	ATG	44	ENST00000374433.6	ENST00000374433.6.1
692	chr10:33334597-33334663:-	chr10	33334598	33334663	ENSG00000099250.17	NRP1	-	ATG	21	ENST00000265371.8	ENST00000265371.8.1
693	chr10:50460756-50460792:-	chr10	50460757	50460792	ENSG00000198964.13	SGMS1	-	ATG	11	ENST00000361781.6	ENST00000361781.6.1
694	chr10:68572292-68572514:+	chr10	68572293	68572514	ENSG00000138336.8	TET1	+	ATG	73	ENST00000373644.4	ENST00000373644.4.1
695	chr10:86521592-86521730:-	chr10	86521593	86521730	ENSG00000062650.18	WAPL	-	ATG	45	ENST00000298767.9	ENST00000298767.9.1
696	chr10:86521696-86521741:-	chr10	86521697	86521741	ENSG00000062650.18	WAPL	-	ATG	14	ENST00000298767.9	ENST00000298767.9.2
697	chr10:88880150-88901656:+	chr10	88880151	88901656	ENSG00000138134.11	STAMBPL1	+	ATG	162	ENST00000371927.7	ENST00000371927.7.1
698	chr10:87863708-87863846:+	chr10	87863709	87863846	ENSG00000171862.10	PTEN	+	ATG	45	ENST00000371953.7	ENST00000371953.7.1
699	chr10:97619662-97633484:-	chr10	97619663	97633484	ENSG00000171160.17	MORN4	-	ATG	52	ENST00000478953.1	ENST00000478953.1.1
700	chr10:96129898-96132617:+	chr10	96129899	96132617	ENSG00000177853.14	ZNF518A	+	ATG	41	ENST00000316045.9	ENST00000316045.9.1
701	chr10:118046277-118046391:-	chr10	118046278	118046391	ENSG00000107560.10	RAB11FIP2	-	ATG	37	ENST00000355624.7	ENST00000355624.7.1
702	chr10:114938227-114938296:+	chr10	114938228	114938296	ENSG00000165832.5	TRUB1	+	ATG	22	ENST00000298746.4	ENST00000298746.4.1
703	chr10:121593864-121593897:-	chr10	121593865	121593897	ENSG00000066468.22	FGFR2	-	ATG	10	ENST00000358487.9	ENST00000358487.9.1
704	chr10:133302945-133302966:-	chr10	133302946	133302966	ENSG00000130640.13	TUBGCP2	-	ATG	6	ENST00000252936.7	ENST00000252936.7.1
705	chr11:208065-208119:+	chr11	208066	208119	ENSG00000177963.14	RIC8A	+	ATG	17	ENST00000526104.5	ENST00000526104.5.2
706	chr11:904826-910780:-	chr11	904827	910780	ENSG00000177830.17	CHID1	-	ATG	12	ENST00000323578.12	ENST00000323578.12.1
707	chr11:2402314-2402338:+	chr11	2402315	2402338	ENSG00000184281.14	TSSC4	+	ATG	7	ENST00000380996.9	ENST00000380996.9.2
708	chr11:9265172-9265274:-	chr11	9265173	9265274	ENSG00000184014.7	DENND5A	-	ATG	33	ENST00000328194.7	ENST00000328194.7.1
709	chr11:10751054-10751171:+	chr11	10751055	10751171	ENSG00000198730.8	CTR9	+	ATG	38	ENST00000361367.6	ENST00000361367.6.1
710	chr11:36296378-36401125:+	chr11	36296379	36401125	ENSG00000135362.13	PRR5L	+	ATG	62	ENST00000530639.5	ENST00000530639.5.1
711	chr11:45805361-45805604:+	chr11	45805362	45805604	ENSG00000181830.8	SLC35C1	+	ATG	80	ENST00000314134.3	ENST00000314134.3.1
712	chr11:45805654-45805735:+	chr11	45805655	45805735	ENSG00000181830.8	SLC35C1	+	ATG	26	ENST00000314134.3	ENST00000314134.3.2
713	chr11:57673055-57673163:+	chr11	57673056	57673163	ENSG00000156599.10	ZDHHC5	+	ATG	35	ENST00000287169.7	ENST00000287169.7.1
714	chr11:57667926-57668016:+	chr11	57667927	57668016	ENSG00000156599.10	ZDHHC5	+	ATG	29	ENST00000287169.7	ENST00000287169.7.2
715	chr11:57672203-57672269:+	chr11	57672204	57672269	ENSG00000156599.10	ZDHHC5	+	ATG	21	ENST00000287169.7	ENST00000287169.7.3
716	chr11:61333295-61333316:+	chr11	61333296	61333316	ENSG00000149476.15	TKFC	+	ATG	6	ENST00000394900.7	ENST00000394900.7.1
717	chr11:61362196-61362280:-	chr11	61362197	61362280	ENSG00000162144.9	CYB561A3	-	ATG	27	ENST00000294072.8	ENST00000294072.8.1
718	chr11:63813414-63813462:+	chr11	63813415	63813462	ENSG00000168005.8	C11orf84	+	ATG	15	ENST00000294244.8	ENST00000294244.8.1
719	chr11:65613870-65613930:-	chr11	65613871	65613930	ENSG00000173327.7	MAP3K11	-	ATG	19	ENST00000309100.7	ENST00000309100.7.1
720	chr11:65640884-65640986:+	chr11	65640885	65640986	ENSG00000213445.9	SIPA1	+	ATG	33	ENST00000534313.5	ENST00000534313.5.1
721	chr11:67505210-67505324:-	chr11	67505211	67505324	ENSG00000110697.12	PITPNM1	-	ATG	37	ENST00000436757.6	ENST00000436757.6.1
722	chr11:73876792-73876840:-	chr11	73876793	73876840	ENSG00000181924.6	CHCHD8	-	ATG	15	ENST00000355693.4	ENST00000355693.4.1
723	chr11:94768424-94768493:+	chr11	94768425	94768493	ENSG00000166025.17	AMOTL1	+	ATG	22	ENST00000317829.12	ENST00000317829.12.1
724	chr11:102348659-102348692:+	chr11	102348660	102348692	ENSG00000110330.8	BIRC2	+	ATG	10	ENST00000227758.6	ENST00000227758.6.1
725	chr11:118365058-118365079:+	chr11	118365059	118365079	ENSG00000110344.9	UBE4A	+	ATG	6	ENST00000252108.7	ENST00000252108.7.1
726	chr11:119334866-119335034:+	chr11	119334867	119335034	ENSG00000173456.4	RNF26	+	ATG	55	ENST00000311413.4	ENST00000311413.4.1
727	chr11:119334533-119334578:+	chr11	119334534	119334578	ENSG00000173456.4	RNF26	+	ATG	14	ENST00000311413.4	ENST00000311413.4.2
728	chr11:128694217-128758133:+	chr11	128694218	128758133	ENSG00000151702.16	FLI1	+	ATG	25	ENST00000527786.6	ENST00000527786.6.1
729	chr12:389167-389197:-	chr12	389168	389197	ENSG00000073614.12	KDM5A	-	ATG	9	ENST00000399788.6	ENST00000399788.6.1
730	chr12:753222-753300:+	chr12	753223	753300	ENSG00000060237.16	WNK1	+	ATG	25	ENST00000535572.5	ENST00000535572.5.1
731	chr12:753275-753431:+	chr12	753276	753431	ENSG00000060237.16	WNK1	+	ATG	51	ENST00000535572.5	ENST00000535572.5.2
732	chr12:7936124-7936205:-	chr12	7936125	7936205	ENSG00000059804.15	SLC2A3	-	ATG	26	ENST00000075120.11	ENST00000075120.11.1
733	chr12:12343381-12350113:-	chr12	12343382	12350113	ENSG00000111261.13	MANSC1	-	ATG	22	ENST00000535902.5	ENST00000535902.5.1
734	chr12:15882404-15882425:+	chr12	15882405	15882425	ENSG00000023734.10	STRAP	+	ATG	6	ENST00000419869.6	ENST00000419869.6.1
735	chr12:42325982-42326024:-	chr12	42325983	42326024	ENSG00000139168.7	ZCRB1	-	ATG	13	ENST00000266529.7	ENST00000266529.7.1
736	chr12:48852113-48852137:-	chr12	48852114	48852137	ENSG00000174243.9	DDX23	-	ATG	7	ENST00000308025.7	ENST00000308025.7.1
737	chr12:49348067-49348772:+	chr12	49348068	49348772	ENSG00000178401.14	DNAJC22	+	ATG	14	ENST00000549441.6	ENST00000549441.6.1
738	chr12:46243229-46243274:-	chr12	46243230	46243274	ENSG00000111371.15	SLC38A1	-	ATG	14	ENST00000398637.9	ENST00000398637.9.2
739	chr12:49106993-49110569:-	chr12	49106994	49110569	ENSG00000139636.15	LMBR1L	-	ATG	45	ENST00000267102.12	ENST00000267102.12.1
740	chr12:49806032-49828372:-	chr12	49806033	49828372	ENSG00000167566.16	NCKAP5L	-	ATG	19	ENST00000335999.6	ENST00000335999.6.1
741	chr12:50057628-50057655:+	chr12	50057629	50057655	ENSG00000110881.11	ASIC1	+	ATG	8	ENST00000228468.8	ENST00000228468.8.1
742	chr12:54017295-54053923:+	chr12	54017296	54053923	ENSG00000198353.7	HOXC4	+	ATG	80	ENST00000303406.4	ENST00000303406.4.1
743	chr12:55729434-55729596:-	chr12	55729435	55729596	ENSG00000135404.11	CD63	-	ATG	53	ENST00000549117.5	ENST00000549117.5.1
744	chr12:57395760-57395793:-	chr12	57395761	57395793	ENSG00000179912.20	R3HDM2	-	ATG	10	ENST00000347140.7	ENST00000347140.7.1
745	chr12:64409961-64410027:+	chr12	64409962	64410027	ENSG00000184575.11	XPOT	+	ATG	21	ENST00000332707.9	ENST00000332707.9.1
746	chr12:69739456-69739555:+	chr12	69739457	69739555	ENSG00000127328.21	RAB3IP	+	ATG	32	ENST00000550536.5	ENST00000550536.5.1
747	chr12:68746253-68746652:+	chr12	68746254	68746652	ENSG00000175782.9	SLC35E3	+	ATG	132	ENST00000398004.3	ENST00000398004.3.1
748	chr12:68808380-68808425:+	chr12	68808381	68808425	ENSG00000135679.23	MDM2	+	ATG	14	ENST00000258149.9	ENST00000258149.9.2
749	chr12:71686619-71686643:+	chr12	71686620	71686643	ENSG00000139291.13	TMEM19	+	ATG	7	ENST00000266673.9	ENST00000266673.9.1
750	chr12:88141334-88142064:-	chr12	88141335	88142064	ENSG00000198707.14	CEP290	-	ATG	54	ENST00000552810.5	ENST00000552810.5.1
751	chr12:88142403-88142460:+	chr12	88142404	88142460	ENSG00000139324.11	TMTC3	+	ATG	18	ENST00000266712.10	ENST00000266712.10.1
752	chr12:98644740-98644896:-	chr12	98644741	98644896	ENSG00000166130.14	IKBIP	-	ATG	51	ENST00000342502.6	ENST00000342502.6.1
753	chr12:109093363-109093411:-	chr12	109093364	109093411	ENSG00000189046.10	ALKBH2	-	ATG	15	ENST00000343075.7	ENST00000343075.7.1
754	chr12:113186291-113186750:+	chr12	113186292	113186750	ENSG00000139405.15	RITA1	+	ATG	30	ENST00000548278.1	ENST00000548278.1.1
755	chr12:113185914-113185989:+	chr12	113185915	113185989	ENSG00000139405.15	RITA1	+	ATG	24	ENST00000548278.1	ENST00000548278.1.2
756	chr12:111406242-111418149:+	chr12	111406243	111418149	ENSG00000111252.10	SH2B3	+	ATG	21	ENST00000341259.6	ENST00000341259.6.1
757	chr12:110614105-110614186:+	chr12	110614106	110614186	ENSG00000204852.15	TCTN1	+	ATG	26	ENST00000551590.5	ENST00000551590.5.1
758	chr12:111842023-111842197:+	chr12	111842024	111842197	ENSG00000089022.13	MAPKAPK5	+	ATG	57	ENST00000550735.6	ENST00000550735.6.2
759	chr12:123230456-123230486:-	chr12	123230457	123230486	ENSG00000051825.14	MPHOSPH9	-	ATG	9	ENST00000606320.5	ENST00000606320.5.1
760	chr12:124011641-124011851:+	chr12	124011642	124011851	ENSG00000179195.15	ZNF664	+	ATG	69	ENST00000539644.5	ENST00000539644.5.1
761	chr12:124011953-124012040:+	chr12	124011954	124012040	ENSG00000179195.15	ZNF664	+	ATG	28	ENST00000539644.5	ENST00000539644.5.2
762	chr12:123671137-123671179:+	chr12	123671138	123671179	ENSG00000168778.11	TCTN2	+	ATG	13	ENST00000303372.6	ENST00000303372.6.1
763	chr12:123972553-123972616:-	chr12	123972554	123972616	ENSG00000119242.8	CCDC92	-	ATG	20	ENST00000238156.7	ENST00000238156.7.1
764	chr12:132822200-132822248:-	chr12	132822201	132822248	ENSG00000090615.14	GOLGA3	-	ATG	15	ENST00000456883.6	ENST00000456883.6.1
765	chr12:133080976-133081272:+	chr12	133080977	133081272	ENSG00000196387.9	ZNF140	+	ATG	31	ENST00000355557.6	ENST00000355557.6.1
766	chr13:26221270-26221330:-	chr13	26221271	26221330	ENSG00000127870.16	RNF6	-	ATG	19	ENST00000381588.8	ENST00000381588.8.1
767	chr13:27621925-27621961:+	chr13	27621926	27621961	ENSG00000186184.17	POLR1D	+	ATG	11	ENST00000636817.1	ENST00000636817.1.1
768	chr13:36283698-36297719:-	chr13	36283699	36297719	ENSG00000250709.1	CCDC169-SOHLH2	-	ATG	28	ENST00000511166.1	ENST00000511166.1.1
769	chr13:48975931-48976012:+	chr13	48975932	48976012	ENSG00000102531.16	FNDC3A	+	ATG	26	ENST00000492622.6	ENST00000492622.6.1
770	chr13:67229884-67229983:-	chr13	67229885	67229983	ENSG00000184226.14	PCDH9	-	ATG	32	ENST00000544246.5	ENST00000544246.5.1
771	chr13:102799339-102799420:+	chr13	102799340	102799420	ENSG00000134897.13	BIVM	+	ATG	26	ENST00000257336.5	ENST00000257336.5.2
772	chr14:23299591-23307260:+	chr14	23299592	23307260	ENSG00000129473.9	BCL2L2	+	ATG	29	ENST00000553824.5	ENST00000553824.5.1
773	chr14:24114993-24115098:+	chr14	24114994	24115098	ENSG00000100897.17	DCAF11	+	ATG	34	ENST00000446197.7	ENST00000446197.7.1
774	chr14:35121925-35121988:-	chr14	35121926	35121988	ENSG00000092020.10	PPP2R3C	-	ATG	20	ENST00000261475.9	ENST00000261475.9.1
775	chr14:39103157-39103214:-	chr14	39103158	39103214	ENSG00000100934.14	SEC23A	-	ATG	18	ENST00000307712.10	ENST00000307712.10.1
776	chr14:49620883-49620925:+	chr14	49620884	49620925	ENSG00000168282.5	MGAT2	+	ATG	13	ENST00000305386.3	ENST00000305386.3.1
777	chr14:44962384-44962525:+	chr14	44962385	44962525	ENSG00000198718.12	TOGARAM1	+	ATG	46	ENST00000361577.7	ENST00000361577.7.1
778	chr14:50668006-50668138:-	chr14	50668007	50668138	ENSG00000151748.14	SAV1	-	ATG	43	ENST00000324679.4	ENST00000324679.4.2
779	chr14:49852736-49852997:-	chr14	49852737	49852997	ENSG00000165525.17	NEMF	-	ATG	86	ENST00000298310.9	ENST00000298310.9.1
780	chr14:55027412-55043015:+	chr14	55027413	55043015	ENSG00000180008.8	SOCS4	+	ATG	40	ENST00000395472.2	ENST00000395472.2.1
781	chr14:73892090-73892123:+	chr14	73892091	73892123	ENSG00000119725.18	ZNF410	+	ATG	10	ENST00000555044.5	ENST00000555044.5.1
782	chr14:70907577-70907754:+	chr14	70907578	70907754	ENSG00000100731.15	PCNX1	+	ATG	58	ENST00000304743.6	ENST00000304743.6.1
783	chr14:74692087-74692183:-	chr14	74692088	74692183	ENSG00000119682.16	AREL1	-	ATG	31	ENST00000356357.8	ENST00000356357.8.1
784	chr14:80916495-80939464:-	chr14	80916496	80939464	ENSG00000100629.16	C14orf145	-	ATG	48	ENST00000555265.5	ENST00000555265.5.1
785	chr14:99481425-99481458:+	chr14	99481426	99481458	ENSG00000090061.17	CCNK	+	ATG	10	ENST00000555049.5	ENST00000555049.5.1
786	chr14:96502411-96502447:+	chr14	96502412	96502447	ENSG00000090060.17	PAPOLA	+	ATG	11	ENST00000216277.12	ENST00000216277.12.1
787	chr14:104795514-104795553:-	chr14	104795515	104795553	ENSG00000142208.15	AKT1	-	ATG	12	ENST00000349310.7	ENST00000349310.7.1
788	chr15:43777413-43777482:+	chr15	43777414	43777482	ENSG00000140264.19	SERF2	+	ATG	22	ENST00000381359.5	ENST00000381359.5.1
789	chr15:45522419-45522467:-	chr15	45522420	45522467	ENSG00000104154.6	SLC30A4	-	ATG	15	ENST00000261867.4	ENST00000261867.4.1
790	chr15:50424572-50439025:+	chr15	50424573	50439025	ENSG00000138592.13	USP8	+	ATG	32	ENST00000396444.7	ENST00000396444.7.1
791	chr15:50424463-50424493:+	chr15	50424464	50424493	ENSG00000138592.13	USP8	+	ATG	9	ENST00000396444.7	ENST00000396444.7.2
792	chr15:57706727-57708746:+	chr15	57706728	57708746	ENSG00000255529.7	POLR2M	+	ATG	86	ENST00000299638.7	ENST00000299638.7.1
793	chr15:58771325-58771373:+	chr15	58771326	58771373	ENSG00000128923.10	FAM63B	+	ATG	15	ENST00000559228.5	ENST00000559228.5.1
794	chr15:72117827-72117902:-	chr15	72117828	72117902	ENSG00000066933.15	MYO9A	-	ATG	24	ENST00000356056.9	ENST00000356056.9.1
795	chr15:77690870-77734999:-	chr15	77690871	77734999	ENSG00000169783.12	LINGO1	-	ATG	12	ENST00000570216.5	ENST00000570216.5.1
796	chr15:81001888-81001969:+	chr15	81001889	81001969	ENSG00000140406.3	MESDC1	+	ATG	26	ENST00000267984.3	ENST00000267984.3.4
797	chr15:84982065-84982116:+	chr15	84982066	84982116	ENSG00000073417.14	PDE8A	+	ATG	16	ENST00000310298.8	ENST00000310298.8.1
798	chr15:89333820-89333892:-	chr15	89333821	89333892	ENSG00000140521.12	POLG	-	ATG	23	ENST00000268124.9	ENST00000268124.9.1
799	chr15:99731407-99731999:-	chr15	99731408	99731999	ENSG00000183060.15	LYSMD4	-	ATG	98	ENST00000344791.6	ENST00000344791.6.1
800	chr15:90875625-90875691:+	chr15	90875626	90875691	ENSG00000140564.11	FURIN	+	ATG	21	ENST00000268171.7	ENST00000268171.7.1
801	chr16:249600-254383:+	chr16	249601	254383	ENSG00000167930.15	FAM234A	+	ATG	18	ENST00000301679.6	ENST00000301679.6.1
802	chr16:3024154-3024238:+	chr16	3024155	3024238	ENSG00000131652.13	THOC6	+	ATG	27	ENST00000326266.12	ENST00000326266.12.1
803	chr16:3443766-3476227:+	chr16	3443767	3476227	ENSG00000122390.17	NAA60	+	ATG	48	ENST00000407558.8	ENST00000407558.8.1
804	chr16:19114390-19114510:+	chr16	19114391	19114510	ENSG00000205730.6	ITPRIPL2	+	ATG	39	ENST00000381440.4	ENST00000381440.4.1
805	chr16:20862557-20900279:-	chr16	20862558	20900279	ENSG00000188215.9	DCUN1D3	-	ATG	53	ENST00000324344.8	ENST00000324344.8.1
806	chr16:31073942-31074008:-	chr16	31073943	31074008	ENSG00000167394.12	ZNF668	-	ATG	21	ENST00000300849.4	ENST00000300849.4.1
807	chr16:31109046-31109106:+	chr16	31109047	31109106	ENSG00000103507.13	BCKDK	+	ATG	19	ENST00000394951.5	ENST00000394951.5.1
808	chr16:50749576-50749672:+	chr16	50749577	50749672	ENSG00000083799.17	CYLD	+	ATG	31	ENST00000427738.7	ENST00000427738.7.1
809	chr16:57735794-57736988:+	chr16	57735795	57736988	ENSG00000140854.12	KATNB1	+	ATG	23	ENST00000379661.7	ENST00000379661.7.1
810	chr16:57186339-57204535:+	chr16	57186340	57204535	ENSG00000159579.13	RSPRY1	+	ATG	47	ENST00000394420.8	ENST00000394420.8.2
811	chr16:67571148-67571187:+	chr16	67571149	67571187	ENSG00000102974.15	CTCF	+	ATG	12	ENST00000264010.9	ENST00000264010.9.1
812	chr16:71789414-71808832:-	chr16	71789415	71808832	ENSG00000166747.12	AP1G1	-	ATG	45	ENST00000299980.8	ENST00000299980.8.1
813	chr16:71454158-71456796:-	chr16	71454159	71456796	ENSG00000167377.17	ZNF23	-	ATG	30	ENST00000357254.8	ENST00000357254.8.1
814	chr16:81007267-81011982:+	chr16	81007268	81011982	ENSG00000166451.13	CENPN	+	ATG	20	ENST00000393335.7	ENST00000393335.7.1
815	chr16:84116750-84116810:-	chr16	84116751	84116810	ENSG00000140943.16	MBTPS1	-	ATG	19	ENST00000343411.7	ENST00000343411.7.2
816	chr16:84995942-84995987:-	chr16	84995943	84995987	ENSG00000153786.12	ZDHHC7	-	ATG	14	ENST00000313732.8	ENST00000313732.8.1
817	chr16:89490470-89490536:-	chr16	89490471	89490536	ENSG00000167522.15	ANKRD11	-	ATG	21	ENST00000301030.9	ENST00000301030.9.2
818	chr16:89954247-89955225:+	chr16	89954248	89955225	ENSG00000140995.16	DEF8	+	ATG	61	ENST00000563594.5	ENST00000563594.5.1
819	chr16:89949465-89954263:+	chr16	89949466	89954263	ENSG00000140995.16	DEF8	+	ATG	22	ENST00000563594.5	ENST00000563594.5.2
820	chr17:3690956-3696054:-	chr17	3690957	3696054	ENSG00000083454.21	P2RX5	-	ATG	135	ENST00000552276.5	ENST00000552276.5.1
821	chr17:7466736-7484023:-	chr17	7466737	7484023	ENSG00000174282.11	ZBTB4	-	ATG	54	ENST00000311403.4	ENST00000311403.4.1
822	chr17:7405578-7405605:+	chr17	7405579	7405605	ENSG00000169992.9	NLGN2	+	ATG	8	ENST00000575301.5	ENST00000575301.5.1
823	chr17:15945055-15945469:+	chr17	15945056	15945469	ENSG00000170425.3	ADORA2B	+	ATG	137	ENST00000304222.2	ENST00000304222.2.1
824	chr17:16215472-16215526:-	chr17	16215473	16215526	ENSG00000141027.20	NCOR1	-	ATG	17	ENST00000268712.7	ENST00000268712.7.1
825	chr17:16567766-16567805:-	chr17	16567767	16567805	ENSG00000141040.14	ZNF287	-	ATG	12	ENST00000395825.3	ENST00000395825.3.1
826	chr17:17681719-17681779:+	chr17	17681720	17681779	ENSG00000108557.18	RAI1	+	ATG	19	ENST00000353383.5	ENST00000353383.5.1
827	chr17:19282952-19282997:+	chr17	19282953	19282997	ENSG00000072134.15	EPN2	+	ATG	14	ENST00000314728.9	ENST00000314728.9.1
828	chr17:21284844-21284889:+	chr17	21284845	21284889	ENSG00000034152.18	MAP2K3	+	ATG	14	ENST00000342679.8	ENST00000342679.8.1
829	chr17:19977722-19977800:-	chr17	19977723	19977800	ENSG00000108599.14	AKAP10	-	ATG	25	ENST00000225737.10	ENST00000225737.10.1
830	chr17:29451486-29451507:+	chr17	29451487	29451507	ENSG00000160551.11	TAOK1	+	ATG	6	ENST00000261716.7	ENST00000261716.7.1
831	chr17:39451191-39451245:-	chr17	39451192	39451245	ENSG00000125686.11	MED1	-	ATG	17	ENST00000394287.7	ENST00000394287.7.1
832	chr17:40122308-40122479:+	chr17	40122309	40122479	ENSG00000188895.11	MSL1	+	ATG	56	ENST00000398532.8	ENST00000398532.8.1
833	chr17:40100119-40100311:-	chr17	40100120	40100311	ENSG00000126368.5	NR1D1	-	ATG	63	ENST00000246672.3	ENST00000246672.3.1
834	chr17:44117682-44123592:-	chr17	44117683	44123592	ENSG00000108840.15	HDAC5	-	ATG	36	ENST00000225983.10	ENST00000225983.10.1
835	chr17:58417122-58417215:-	chr17	58417123	58417215	ENSG00000108375.12	RNF43	-	ATG	30	ENST00000407977.6	ENST00000407977.6.1
836	chr17:56978109-56978229:+	chr17	56978110	56978229	ENSG00000121064.12	SCPEP1	+	ATG	39	ENST00000262288.7	ENST00000262288.7.1
837	chr17:57085380-57105446:+	chr17	57085381	57105446	ENSG00000121057.12	AKAP1	+	ATG	7	ENST00000337714.7	ENST00000337714.7.1
838	chr17:59964610-59964694:-	chr17	59964611	59964694	ENSG00000189050.15	RNFT1	-	ATG	27	ENST00000305783.12	ENST00000305783.12.1
839	chr17:63826928-63827159:-	chr17	63826929	63827159	ENSG00000108592.16	FTSJ3	-	ATG	35	ENST00000427159.6	ENST00000427159.6.1
840	chr17:67239480-67243813:-	chr17	67239481	67243813	ENSG00000198265.11	HELZ	-	ATG	12	ENST00000358691.9	ENST00000358691.9.1
841	chr17:68248064-68248157:+	chr17	68248065	68248157	ENSG00000196704.11	AMZ2	+	ATG	30	ENST00000359904.7	ENST00000359904.7.2
842	chr17:75471835-75485905:+	chr17	75471836	75485905	ENSG00000177728.16	KIAA0195	+	ATG	82	ENST00000577380.5	ENST00000577380.5.1
843	chr17:75979280-75979424:+	chr17	75979281	75979424	ENSG00000257949.6	TEN1	+	ATG	47	ENST00000397640.5	ENST00000397640.5.1
844	chr17:77089165-77093272:+	chr17	77089166	77093272	ENSG00000129657.14	SEC14L1	+	ATG	44	ENST00000392476.6	ENST00000392476.6.2
845	chr17:76550879-76550948:-	chr17	76550880	76550948	ENSG00000161544.9	CYGB	-	ATG	22	ENST00000589145.1	ENST00000589145.1.1
846	chr17:82023611-82023770:+	chr17	82023612	82023770	ENSG00000169683.7	LRRC45	+	ATG	52	ENST00000306688.7	ENST00000306688.7.1
847	chr17:81239272-81239374:+	chr17	81239273	81239374	ENSG00000224877.3	C17orf89	+	ATG	33	ENST00000431388.2	ENST00000431388.2.1
848	chr18:9708368-9775333:+	chr18	9708369	9775333	ENSG00000168461.12	RAB31	+	ATG	43	ENST00000578921.5	ENST00000578921.5.1
849	chr18:11689339-11689366:+	chr18	11689340	11689366	ENSG00000141404.15	GNAL	+	ATG	8	ENST00000334049.10	ENST00000334049.10.1
850	chr18:2571529-2573062:+	chr18	2571530	2573062	ENSG00000080986.12	NDC80	+	ATG	79	ENST00000261597.8	ENST00000261597.8.1
851	chr18:32092046-32092082:+	chr18	32092047	32092082	ENSG00000134758.13	RNF138	+	ATG	11	ENST00000261593.7	ENST00000261593.7.1
852	chr18:48950147-48950594:-	chr18	48950148	48950594	ENSG00000101665.8	SMAD7	-	ATG	148	ENST00000262158.6	ENST00000262158.6.1
853	chr18:49813751-49813823:-	chr18	49813752	49813823	ENSG00000167315.17	ACAA2	-	ATG	23	ENST00000285093.14	ENST00000285093.14.1
854	chr18:51046933-51047023:+	chr18	51046934	51047023	ENSG00000141646.13	SMAD4	+	ATG	29	ENST00000398417.6	ENST00000398417.6.1
855	chr18:61816563-61892840:-	chr18	61816564	61892840	ENSG00000176641.10	RNF152	-	ATG	26	ENST00000312828.3	ENST00000312828.3.1
856	chr19:1021083-1021110:-	chr19	1021084	1021110	ENSG00000182087.13	TMEM259	-	ATG	8	ENST00000356663.7	ENST00000356663.7.1
857	chr19:2737331-2737364:-	chr19	2737332	2737364	ENSG00000267001.1	AC006538.4	-	ATG	10	ENST00000586572.1	ENST00000586572.1.1
858	chr19:6361456-6361534:+	chr19	6361457	6361534	ENSG00000125656.9	CLPP	+	ATG	25	ENST00000245816.9	ENST00000245816.9.1
859	chr19:10500010-10503551:-	chr19	10500011	10503551	ENSG00000079999.13	KEAP1	-	ATG	126	ENST00000171111.9	ENST00000171111.9.1
860	chr19:11356879-11356963:+	chr19	11356880	11356963	ENSG00000105520.10	PLPPR2	+	ATG	27	ENST00000251473.9	ENST00000251473.9.1
861	chr19:17245469-17245544:-	chr19	17245470	17245544	ENSG00000160113.5	NR2F6	-	ATG	24	ENST00000291442.3	ENST00000291442.3.1
862	chr19:18155480-18155573:+	chr19	18155481	18155573	ENSG00000105647.16	PIK3R2	+	ATG	30	ENST00000222254.12	ENST00000222254.12.1
863	chr19:18155599-18155623:+	chr19	18155600	18155623	ENSG00000105647.16	PIK3R2	+	ATG	7	ENST00000222254.12	ENST00000222254.12.2
864	chr19:18155816-18155849:+	chr19	18155817	18155849	ENSG00000105647.16	PIK3R2	+	ATG	10	ENST00000222254.12	ENST00000222254.12.3
865	chr19:18419576-18419612:+	chr19	18419577	18419612	ENSG00000130511.15	SSBP4	+	ATG	11	ENST00000348495.10	ENST00000348495.10.1
866	chr19:34772938-34773073:-	chr19	34772939	34773073	ENSG00000153896.17	ZNF599	-	ATG	44	ENST00000329285.12	ENST00000329285.12.1
867	chr19:35248565-35248868:+	chr19	35248566	35248868	ENSG00000105699.16	LSR	+	ATG	100	ENST00000602122.5	ENST00000602122.5.1
868	chr19:36689412-36689439:+	chr19	36689413	36689439	ENSG00000189042.13	ZNF567	+	ATG	8	ENST00000536254.6	ENST00000536254.6.1
869	chr19:36235728-36235818:+	chr19	36235729	36235818	ENSG00000167635.11	ZNF146	+	ATG	29	ENST00000443387.2	ENST00000443387.2.3
870	chr19:37324921-37357996:+	chr19	37324922	37357996	ENSG00000181666.17	HKR1	+	ATG	90	ENST00000591471.5	ENST00000591471.5.1
871	chr19:36525202-36525301:-	chr19	36525203	36525301	ENSG00000254004.6	ZNF260	-	ATG	32	ENST00000523638.5	ENST00000523638.5.1
872	chr19:36607613-36610665:+	chr19	36607614	36610665	ENSG00000161298.17	ZNF382	+	ATG	58	ENST00000292928.6	ENST00000292928.6.1
873	chr19:36115209-36115323:+	chr19	36115210	36115323	ENSG00000105254.11	TBCB	+	ATG	37	ENST00000221855.7	ENST00000221855.7.1
874	chr19:40799195-40800370:+	chr19	40799196	40800370	ENSG00000269858.5	EGLN2	+	ATG	32	ENST00000303961.8	ENST00000303961.8.2
875	chr19:40751110-40751140:+	chr19	40751111	40751140	ENSG00000077312.8	SNRPA	+	ATG	9	ENST00000243563.7	ENST00000243563.7.1
876	chr19:42220296-42224285:+	chr19	42220297	42224285	ENSG00000167625.10	ZNF526	+	ATG	53	ENST00000301215.7	ENST00000301215.7.1
877	chr19:43935004-43935106:-	chr19	43935005	43935106	ENSG00000124459.11	ZNF45	-	ATG	33	ENST00000269973.9	ENST00000269973.9.1
878	chr19:43924248-43924408:-	chr19	43924249	43924408	ENSG00000124459.11	ZNF45	-	ATG	22	ENST00000269973.9	ENST00000269973.9.2
879	chr19:44025436-44027063:+	chr19	44025437	44027063	ENSG00000159885.13	ZNF222	+	ATG	47	ENST00000187879.12	ENST00000187879.12.1
880	chr19:45901688-45901811:-	chr19	45901689	45901811	ENSG00000176182.5	MYPOP	-	ATG	40	ENST00000322217.5	ENST00000322217.5.1
881	chr19:48753004-48753347:-	chr19	48753005	48753347	ENSG00000174951.11	FUT1	-	ATG	46	ENST00000310160.7	ENST00000310160.7.1
882	chr19:48753453-48753492:-	chr19	48753454	48753492	ENSG00000174951.11	FUT1	-	ATG	12	ENST00000310160.7	ENST00000310160.7.2
883	chr19:48645935-48646025:-	chr19	48645936	48646025	ENSG00000063180.8	CA11	-	ATG	29	ENST00000084798.8	ENST00000084798.8.1
884	chr19:46746068-46748085:+	chr19	46746069	46748085	ENSG00000181027.10	FKRP	+	ATG	26	ENST00000318584.9	ENST00000318584.9.1
885	chr19:46755412-46755433:+	chr19	46755413	46755433	ENSG00000181027.10	FKRP	+	ATG	6	ENST00000318584.9	ENST00000318584.9.2
886	chr19:50020614-50025399:-	chr19	50020615	50025399	ENSG00000105053.10	VRK3	-	ATG	28	ENST00000599538.5	ENST00000599538.5.1
887	chr19:49876982-49877072:-	chr19	49876983	49877072	ENSG00000204673.10	AKT1S1	-	ATG	29	ENST00000391835.1	ENST00000391835.1.2
888	chr19:51974356-51974386:-	chr19	51974357	51974386	ENSG00000256683.6	ZNF350	-	ATG	9	ENST00000243644.8	ENST00000243644.8.1
889	chr19:49813142-49813163:-	chr19	49813143	49813163	ENSG00000010361.13	FUZ	-	ATG	6	ENST00000313777.8	ENST00000313777.8.1
890	chr19:52025741-52025813:-	chr19	52025742	52025813	ENSG00000142556.18	ZNF614	-	ATG	23	ENST00000356322.10	ENST00000356322.10.1
891	chr19:55280063-55280253:-	chr19	55280064	55280253	ENSG00000133265.10	HSPBP1	-	ATG	26	ENST00000255631.9	ENST00000255631.9.1
892	chr19:55648946-55649054:+	chr19	55648947	55649054	ENSG00000173581.7	CCDC106	+	ATG	35	ENST00000592996.5	ENST00000592996.5.1
893	chr19:57819912-57856116:+	chr19	57819913	57856116	ENSG00000268750.6	CTD-2583A14.10	+	ATG	32	ENST00000596498.2	ENST00000596498.2.1
894	chr19:57819912-57839032:+	chr19	57819913	57839032	ENSG00000269343.6	ZNF587B	+	ATG	32	ENST00000594328.1	ENST00000594328.1.1
895	chr19:58129468-58154871:-	chr19	58129469	58154871	ENSG00000181894.14	ZNF329	-	ATG	59	ENST00000601887.1	ENST00000601887.1.1
896	chr19:58229567-58230432:+	chr19	58229568	58230432	ENSG00000198131.13	ZNF544	+	ATG	13	ENST00000595981.5	ENST00000595981.5.1
897	chr20:349248-349290:+	chr20	349249	349290	ENSG00000125841.12	NRSN2	+	ATG	13	ENST00000608467.5	ENST00000608467.5.1
898	chr20:24992684-24992834:-	chr20	24992685	24992834	ENSG00000101474.11	APMAP	-	ATG	49	ENST00000217456.2	ENST00000217456.2.1
899	chr20:33686269-33686320:-	chr20	33686270	33686320	ENSG00000101412.12	E2F1	-	ATG	16	ENST00000343380.5	ENST00000343380.5.1
900	chr20:33993688-33993982:+	chr20	33993689	33993982	ENSG00000125970.11	RALY	+	ATG	97	ENST00000375114.7	ENST00000375114.7.1
901	chr20:34369398-34369449:+	chr20	34369399	34369449	ENSG00000078747.14	ITCH	+	ATG	16	ENST00000374864.8	ENST00000374864.8.1
902	chr20:37519330-37527808:-	chr20	37519331	37527808	ENSG00000166619.12	BLCAP	-	ATG	11	ENST00000373537.6	ENST00000373537.6.1
903	chr20:50903959-50928818:-	chr20	50903960	50928818	ENSG00000101126.16	ADNP	-	ATG	69	ENST00000396029.8	ENST00000396029.8.1
904	chr20:50115855-50115936:-	chr20	50115856	50115936	ENSG00000244687.11	UBE2V1	-	ATG	26	ENST00000371677.7	ENST00000371677.7.1
905	chr20:47502006-47583223:+	chr20	47502007	47583223	ENSG00000124151.18	NCOA3	+	ATG	17	ENST00000372004.7	ENST00000372004.7.1
906	chr21:29024631-29027897:+	chr21	29024632	29027897	ENSG00000156256.14	USP16	+	ATG	56	ENST00000399976.6	ENST00000399976.6.1
907	chr21:15730120-15730153:+	chr21	15730121	15730153	ENSG00000155313.15	USP25	+	ATG	10	ENST00000285681.6	ENST00000285681.6.1
908	chr21:33324990-33325029:+	chr21	33324991	33325029	ENSG00000142166.12	IFNAR1	+	ATG	12	ENST00000270139.7	ENST00000270139.7.1
909	chr21:31276877-31339289:-	chr21	31276878	31339289	ENSG00000156299.13	TIAM1	-	ATG	25	ENST00000286827.7	ENST00000286827.7.1
910	chr21:42502330-42518408:+	chr21	42502331	42518408	ENSG00000160190.13	SLC37A1	+	ATG	72	ENST00000398341.7	ENST00000398341.7.1
911	chr21:39313580-39313616:-	chr21	39313581	39313616	ENSG00000185658.13	BRWD1	-	ATG	11	ENST00000333229.6	ENST00000333229.6.1
912	chr21:42010291-42010345:-	chr21	42010292	42010345	ENSG00000173276.13	ZBTB21	-	ATG	17	ENST00000310826.9	ENST00000310826.9.1
913	chr21:46323278-46323362:-	chr21	46323279	46323362	ENSG00000160298.17	C21orf58	-	ATG	27	ENST00000291691.11	ENST00000291691.11.2
914	chr22:19432177-19432288:+	chr22	19432178	19432288	ENSG00000185608.8	MRPL40	+	ATG	36	ENST00000333130.3	ENST00000333130.3.1
915	chr22:20982294-20982444:+	chr22	20982295	20982444	ENSG00000099949.19	LZTR1	+	ATG	49	ENST00000215739.12	ENST00000215739.12.1
916	chr22:20394284-20394377:+	chr22	20394285	20394377	ENSG00000185252.18	ZNF74	+	ATG	30	ENST00000400451.6	ENST00000400451.6.1
917	chr22:21945945-21946059:-	chr22	21945946	21946059	ENSG00000100034.13	PPM1F	-	ATG	37	ENST00000263212.9	ENST00000263212.9.1
918	chr22:27801182-27801218:-	chr22	27801183	27801218	ENSG00000169184.5	MN1	-	ATG	11	ENST00000302326.4	ENST00000302326.4.1
919	chr22:31754870-31754903:+	chr22	31754871	31754903	ENSG00000100150.17	DEPDC5	+	ATG	10	ENST00000642696.1	ENST00000642696.1.1
920	chr22:37566186-37566228:+	chr22	37566187	37566228	ENSG00000128283.6	CDC42EP1	+	ATG	13	ENST00000249014.4	ENST00000249014.4.1
921	chr22:40552165-40552297:-	chr22	40552166	40552297	ENSG00000196588.15	MKL1	-	ATG	43	ENST00000355630.7	ENST00000355630.7.1
922	chr22:38700481-38700544:-	chr22	38700482	38700544	ENSG00000100221.10	JOSD1	-	ATG	20	ENST00000216039.9	ENST00000216039.9.2
923	chr22:41833136-41833163:+	chr22	41833137	41833163	ENSG00000198911.11	SREBF2	+	ATG	8	ENST00000361204.8	ENST00000361204.8.1
924	chrX:10158460-10158490:+	chrX	10158461	10158490	ENSG00000073464.11	CLCN4	+	ATG	9	ENST00000380833.8	ENST00000380833.8.1
925	chrX:13689127-13703850:+	chrX	13689128	13703850	ENSG00000123595.7	RAB9A	+	ATG	65	ENST00000464506.1	ENST00000464506.1.1
926	chrX:24024878-24024899:-	chrX	24024879	24024899	ENSG00000174010.9	KLHL15	-	ATG	6	ENST00000328046.8	ENST00000328046.8.1
927	chrX:47145446-47147425:+	chrX	47145447	47147425	ENSG00000182872.15	RBM10	+	ATG	35	ENST00000377604.7	ENST00000377604.7.1
928	chrX:47218339-47218372:+	chrX	47218340	47218372	ENSG00000102225.15	CDK16	+	ATG	10	ENST00000457458.6	ENST00000457458.6.2
929	chrX:55146232-55161176:-	chrX	55146233	55161176	ENSG00000182518.13	FAM104B	-	ATG	72	ENST00000358460.8	ENST00000358460.8.1
930	chrX:70133722-70133848:+	chrX	70133723	70133848	ENSG00000089289.15	IGBP1	+	ATG	41	ENST00000342206.10	ENST00000342206.10.1
931	chrX:68829156-68829222:+	chrX	68829157	68829222	ENSG00000090776.5	EFNB1	+	ATG	21	ENST00000204961.4	ENST00000204961.4.1
932	chrX:80809619-80809643:-	chrX	80809620	80809643	ENSG00000165288.10	BRWD3	-	ATG	7	ENST00000373275.4	ENST00000373275.4.1
933	chrX:103376402-103377041:+	chrX	103376403	103377041	ENSG00000166681.13	BEX3	+	ATG	74	ENST00000361298.8	ENST00000361298.8.1
934	chrX:119565223-119565355:-	chrX	119565224	119565355	ENSG00000018610.14	CXorf56	-	ATG	43	ENST00000320339.8	ENST00000320339.8.1
935	chrX:129841979-129842060:-	chrX	129841980	129842060	ENSG00000188706.12	ZDHHC9	-	ATG	26	ENST00000357166.10	ENST00000357166.10.1
936	chrX:153723240-153724411:-	chrX	153723241	153724411	ENSG00000185825.16	BCAP31	-	ATG	41	ENST00000345046.11	ENST00000345046.11.1
937	chrX:154488984-154489035:-	chrX	154488985	154489035	ENSG00000126903.15	SLC10A3	-	ATG	16	ENST00000393587.4	ENST00000393587.4.1
938	chrX:154379382-154379442:+	chrX	154379383	154379442	ENSG00000102119.10	EMD	+	ATG	19	ENST00000369842.8	ENST00000369842.8.1
