# Supplementary material for: uORF-Tools—Workflow for the determination of translation-regulatory upstream open reading frames
Source: PLoS One. 2019 Sep 12;14(9):e0222459. doi: 10.1371/journal.pone.0222459 (PMC6742470; doi:10.1371/journal.pone.0222459)
Supplement: S3 Table — (XLSX) [file pone.0222459.s004.xlsx]

## Sheet: Comprehensive_results
coordinates	gene_symbol	transcript_id	uORF_id	Ratio-A-1	Ratio-A-2	Ratio-A-3	Ratio-A-4	Ratio-B-1	Ratio-B-2	Ratio-B-3	Ratio-B-4	std_main_ORF_to_uORF_ratios	log2FC_main_ORF_to_uORF_ratios
chr1:24415814-24419407:+	NIPAL3	ENST00000003912.7	ENST00000003912.7.1	2.23523	1.71193	2.73451	1.93973	1.86664	2.033	1.2029	2.00956	0.565242	0.400007
chr1:114716156-114716849:-	NRAS	ENST00000369535.4	ENST00000369535.4.1	1.92642	5.11895	4.09167	3.36858	6.77755	5.8248	3.56428	2.33951	0.42628	-0.0927701
chr2:96208543-96208630:-	STARD7	ENST00000337288.9	ENST00000337288.9.1	2.0535	2.94792	2.82789	4.0167	2.4965	4.74497	2.08023	2.92225	0.330329	0.06273
chr2:241268523-241315791:-	HDLBP	ENST00000310931.8	ENST00000310931.8.1	14.9637	20.2684	14.1295	13.5013	42.0639	25.2533	25.6451	40.5325	0.18867	-0.969733
chr3:132660317-132660422:+	UBA5	ENST00000356232.8	ENST00000356232.8.1	2.65162	12.5331	7.14034	8.23541	6.27325	30.7112	7.97195	11.2198	0.20781	-0.701067
chr6:24720331-24720439:-	C6orf62	ENST00000378119.8	ENST00000378119.8.1	0.358796	0.688852	0.273224	0.593759	0.544596	0.342439	0.171657	0.190824	0.880776	0.882383
chr6:34425214-34426078:-	RPS10	ENST00000326199.12	ENST00000326199.12.1	0.0194686	0.176209	0.165385	0.163373	0.164682	0.187299	0.0876893	0.08449	0.749125	0.28649
chr6:63572680-63576531:+	PTP4A1	ENST00000370651.5	ENST00000370651.5.1	1.09882	2.19601	1.15909	1.28889	0.752463	0.949349	0.567773	0.528663	0.376475	1.04491
chr7:27179748-27179910:-	HOXA10-HOXA9	ENST00000470747.4	ENST00000470747.4.1	3.47046	52.4258	5.2	3.84018	1.7602	2.90336	2.96598	3.0786	7.10608	2.52539
chr8:144509076-144509445:+	MFSD3	ENST00000301327.4	ENST00000301327.4.1	1	0.0665547	1.85965	0.753175	0.634548	1.47815	1.17995	1.98438	0.692029	-0.161435
chr10:95693685-95694015:-	TCTN3	ENST00000265993.13	ENST00000265993.13.1	5.32331	2.24459	2.7973	2.53813	2.71501	3.60987	3.02276	2.70884	0.506467	0.152144
chr11:112025173-112025509:+	DLAT	ENST00000280346.10	ENST00000280346.10.1	5.96348	9.08986	10.7008	14.0656	11.1432	22.4716	9.29219	15.8846	0.29369	-0.426263
chr12:2885284-2885512:+	RHNO1	ENST00000489288.6	ENST00000489288.6.1	1.1603	1	1.39773	1.92383	1.63009	1.64255	1.32941	1.40971	0.29766	-0.098236
chr12:92145756-92145828:-	BTG1	ENST00000256015.4	ENST00000256015.4.1	6.89864	13.6474	5.96913	6.11633	7.11423	14.4292	6.04843	4.738	0.140813	0.0680893
chr14:103334575-103335924:+	EIF5	ENST00000216554.7	ENST00000216554.7.1	2.9576	4.43871	5.35206	7.45954	2.56931	2.02692	2.55346	3.41907	0.436622	0.929554
chr15:41096325-41116280:-	INO80	ENST00000361937.7	ENST00000361937.7.1	2.7871	33.7255	6.37209	8.70278	17.4592	12.2184	10.8521	10.8107	0.998592	0.108376
chr16:19523960-19524023:+	CCP110	ENST00000396212.6	ENST00000396212.6.1	5.63211	131.902	12.7209	3.17937	9.53644	17.2615	15.2279	7.5982	3.04622	1.24577
chr18:65751093-65809714:+	CDH7	ENST00000397968.3	ENST00000397968.3.1	2.88757	2.86689	2.93283	3.61404	3.40154	2.05422	2.45199	3.16336	0.195637	0.196318
chr19:32959971-32971914:-	CEP89	ENST00000305768.9	ENST00000305768.9.1	1	2.33763	1.18421	2.07986	1.79649	2.43017	1.76996	1.92858	0.211556	-0.292448
chr19:37169899-37169965:-	ZNF585A	ENST00000292841.9	ENST00000292841.9.1	1	3.47137	1.69014	1.5279	0.721718	1.11457	0.68026	0.968214	0.698816	1.09807
chr19:40742432-40744683:-	C19orf54	ENST00000470681.5	ENST00000470681.5.1	0.264601	0.197425	0.342609	0.439303	0.302691	0.32392	0.377344	0.359482	0.217253	-0.146547
chr19:49929395-49930906:+	ATF5	ENST00000423777.6	ENST00000423777.6.1	1.07023	1.94924	1.2561	1.48358	0.277787	0.687963	0.552715	0.591704	0.60321	1.51928
chrX:47218426-47218471:+	CDK16	ENST00000457458.6	ENST00000457458.6.1	72.0674	52.075	82.7725	41.5483	25.3117	18.3417	27.2932	15.8263	0.144255	1.5039
chr1:1375164-1375296:-	AURKAIP1	ENST00000338338.9	ENST00000338338.9.1	27.6503	21.5948	38.1162	61.2344	48.7709	44.8285	53.954	65.4125	0.171895	-0.571726
chr1:9942630-9942735:-	LZIC	ENST00000377223.5	ENST00000377223.5.1	1	1.45169	4.28125	2.34897	1.95014	3.45682	3.69127	5.2019	0.304251	-0.652832
chr1:36397811-36397868:-	LSM10	ENST00000315732.2	ENST00000315732.2.1	7.46067	0.176209	1.71795	4.4922	2.34897	9.2362	2.92059	3.40768	1.19009	0.350978
chr1:53838275-53838407:-	NDC1	ENST00000371429.3	ENST00000371429.3.1	12.1694	16.652	30.931	29.1633	27.3228	43.4347	37.8911	65.6103	0.171544	-0.936788
chr1:53889352-53889463:-	YIPF1	ENST00000072644.6	ENST00000072644.6.1	21.9853	43.0757	9.44826	20.9597	30.2429	25.8772	25.7168	26.2007	0.476403	-0.168551
chr1:52055508-52055691:-	TXNDC12	ENST00000371626.8	ENST00000371626.8.1	9.93551	52.4258	14.6316	12.4754	52.6743	126.764	25.4258	20.7564	0.164381	-1.16918
chr1:93180446-93180557:-	TMED5	ENST00000370282.7	ENST00000370282.7.1	59.7589	75.8012	24.6551	21.3712	100.621	159.547	112.648	77.4555	0.150926	-1.35496
chr1:156728642-156728873:+	RRNAD1	ENST00000368218.8	ENST00000368218.8.1	2.7871	5.11895	2.75	4.29819	3.59978	3.01154	1.672	3.87106	0.384332	0.386562
chr1:156194123-156194192:+	SLC25A44	ENST00000359511.4	ENST00000359511.4.1	6.65309	2.35507	4.92	6.73079	3.71614	11.1244	3.59835	6.25584	0.578171	0.15226
chr1:158076215-158078060:+	KIRREL	ENST00000360089.8	ENST00000360089.8.1	13.5912	5.11895	10.5454	6.82033	6.05492	9.24632	4.18414	5.61321	0.790762	0.707891
chr1:165827833-165885147:+	UCK2	ENST00000642653.1	ENST00000642653.1.1	47.1677	75.8012	15	15.1173	11.2281	15.6906	17.7211	16.8412	1.83561	1.42975
chr1:168178961-168179081:+	TIPRL	ENST00000367833.6	ENST00000367833.6.1	13.9213	23.2424	12.0353	24.8634	14.3955	25.9551	24.6536	34.7179	0.184974	-0.38323
chr1:172442690-172442729:-	PIGC	ENST00000367728.1	ENST00000367728.1.1	21.9853	29.0505	5.10344	4.88022	6.23827	5.01646	10.5792	6.88611	2.18491	1.3932
chr1:173811305-173823975:-	CENPL	ENST00000356198.6	ENST00000356198.6.1	34.5765	5.94275	6.05555	3.06808	8.92551	3.64355	4.69953	6.79188	1.26575	0.857026
chr1:179852705-179852780:-	TOR1AIP2	ENST00000367612.7	ENST00000367612.7.1	7.46067	10.0617	7.85999	14.9613	20.0161	19.8468	16.9517	24.2311	0.0879971	-1.02855
chr1:204411486-204411642:-	PPP1R15B	ENST00000367188.4	ENST00000367188.4.1	5.6883	9.64388	5.45293	8.5745	4.5629	4.17698	4.31397	4.77812	0.437769	0.725525
chr1:204411663-204411690:-	PPP1R15B	ENST00000367188.4	ENST00000367188.4.2	244.43	370.331	97.4088	151.858	65.9841	24.2307	114.854	65.7745	5.71755	2.4689
chr1:227563694-227650975:+	ZNF678	ENST00000608949.5	ENST00000608949.5.1	1	0.195352	0.820513	0.461795	0.11867	0.446634	0.529973	0.493489	3.25112	1.50438
chr1:233327785-233327887:+	RP5-862P8.2	ENST00000366624.7	ENST00000366624.7.1	4.5742	61.776	3.35869	4.06585	5.9308	8.21297	8.53075	10.851	3.0389	1.17974
chr1:231241225-231241339:+	GNPAT	ENST00000366647.8	ENST00000366647.8.1	7.48496	19.9472	8.08235	15.956	7.99501	5.94746	7.35509	5.97423	1.02784	1.01074
chr1:235328581-235328719:+	GGPS1	ENST00000282841.9	ENST00000282841.9.1	5.0145	4.11148	7.31521	4.75894	5.25714	5.43581	4.58837	3.63057	0.322729	0.206427
chr1:240091945-240092071:+	FMN2	ENST00000319653.13	ENST00000319653.13.1	17.7883	19.7003	2.38028	11.7788	15.8535	22.9632	6.28485	7.29317	0.446979	-0.00950885
chr1:241848840-241848906:+	EXO1	ENST00000366548.7	ENST00000366548.7.1	9.029	24.0661	52.7998	25.0574	8.97893	11.0345	15.9387	20.0192	0.906811	0.954364
chr1:236795320-236803436:+	MTR	ENST00000366577.9	ENST00000366577.9.1	12.3814	22.1581	11.2445	15.4527	12.1883	17.9331	15.2921	16.0878	0.177958	-0.0191443
chr1:244835527-244835566:+	COX20	ENST00000411948.6	ENST00000411948.6.1	5.19707	19.7003	1	0.518576	1.63404	1.81401	1.59395	1.57361	4.2523	1.90665
chr2:9423673-9423721:+	CPSF3	ENST00000238112.7	ENST00000238112.7.1	303.189	225.404	100.272	297.273	121.685	119.601	98.8551	132.886	0.558574	0.931231
chr2:27134485-27134578:-	PREB	ENST00000260643.6	ENST00000260643.6.1	9.48873	19.1234	7.00885	8.71	31.751	26.5778	8.44992	10.7061	0.215728	-0.587823
chr2:37316836-37316893:-	PRKD3	ENST00000379066.5	ENST00000379066.5.1	84.9413	52.4258	23.909	44.6328	20.979	24.8227	35.6796	40.9522	1.3044	0.98566
chr2:44169013-44169133:+	PPM1B	ENST00000378551.6	ENST00000378551.6.1	76.5472	94.5015	19.48	24.0731	42.7755	35.1038	18.2943	21.6757	0.659153	0.734869
chr2:44168902-44168929:+	PPM1B	ENST00000378551.6	ENST00000378551.6.2	76.5472	94.5015	22.6511	68.7701	17.8789	45.2583	26.7752	44.7346	1.28617	1.12974
chr2:55419163-55419202:-	CCDC88A	ENST00000263630.13	ENST00000263630.13.1	89.1384	89.8264	26.4545	24.1083	21.5651	55.3827	51.8434	49.6588	1.48473	0.755131
chr2:112646592-112646670:+	SLC20A1	ENST00000272542.7	ENST00000272542.7.1	17.9593	20.771	12.7935	8.75255	19.2188	26.3781	8.05322	12.7658	0.351701	-0.00139296
chr2:113756463-113756490:-	SLC35F5	ENST00000245680.6	ENST00000245680.6.1	26.1824	29.0505	11.6207	6.43231	98.0225	136.211	41.2326	30.7037	0.0319963	-2.0414
chr2:175118339-175136443:-	ATF2	ENST00000345739.9	ENST00000345739.9.1	5.02098	8.67876	1.95789	3.04562	3.89663	3.92147	2.95949	2.88268	0.57025	0.383987
chr2:189661520-189666111:+	ASNSD1	ENST00000260952.8	ENST00000260952.8.1	4.39688	1.22703	1.29915	1.0391	1.27368	1.09049	1.04485	1.37077	1.05875	0.717811
chr2:191013637-191013661:-	STAT1	ENST00000361099.7	ENST00000361099.7.1	30.073	192.678	50.4827	115.188	72.9636	283.776	101.077	101.133	0.280614	-0.551326
chr2:218737595-218737664:+	TTLL4	ENST00000392102.5	ENST00000392102.5.1	8.1484	75.8012	15.1944	20.257	17.2486	20.9687	19.7011	27.4772	1.28463	0.48436
chr2:219245896-219245980:+	STK16	ENST00000409638.7	ENST00000409638.7.1	3.42275	19.7003	2.4	2.2999	3.92475	1.31723	1.45902	2.9473	6.00955	2.19008
chr2:241315603-241315645:-	HDLBP	ENST00000310931.8	ENST00000310931.8.2	61.7614	120.45	55.0909	48.2472	134.916	153.655	76.4746	101.773	0.144974	-0.715412
chr3:12663905-12663959:-	RAF1	ENST00000251849.8	ENST00000251849.8.1	13.9213	12.5331	9.30231	15.9001	19.625	50.2474	12.732	18.2361	0.234174	-0.643111
chr3:15096710-15098157:-	RBSN	ENST00000253699.7	ENST00000253699.7.1	55.5619	43.0757	13.3103	14.632	39.9823	12.5708	21.8689	19.4978	1.12615	0.626533
chr3:28348696-28348783:-	AZI2	ENST00000479665.5	ENST00000479665.5.1	17.7883	2.80677	2.41414	2.52407	4.35459	4.48949	2.07693	2.36681	1.37193	0.794714
chr3:47805344-47805419:+	DHX30	ENST00000445061.5	ENST00000445061.5.1	286.4	22.2295	40.5438	42.9326	30.3849	14.9796	21.5659	28.5473	3.38253	1.8373
chr3:50613894-50617683:+	MAPKAPK3	ENST00000446044.5	ENST00000446044.5.1	1.80758	2.64758	2.28169	7.34047	2.55208	2.53719	2.04534	3.85539	0.438392	0.25438
chr3:94063014-94064501:+	NSUN3	ENST00000314622.8	ENST00000314622.8.1	2.7871	24.3754	1.39623	4.80166	4.07504	3.3518	3.85071	4.19608	2.84637	1.24232
chr3:88058138-88058216:-	CGGBP1	ENST00000462901.5	ENST00000462901.5.1	2.61517	2.80677	5.8125	3.5847	8.2875	4.96871	4.47963	5.27979	0.361504	-0.485533
chr3:99817948-99817978:+	CMSS1	ENST00000421999.7	ENST00000421999.7.1	47.1677	80.4763	5.31313	4.87705	12.0586	11.0455	8.94818	8.71067	2.77998	1.62657
chr3:119498631-119498691:+	TIMMDC1	ENST00000494664.5	ENST00000494664.5.1	2.85285	5.96861	11.3055	4.4468	4.78912	17.3094	5.2035	8.86224	0.738085	-0.146019
chr3:152269025-152269076:+	MBNL1	ENST00000355460.6	ENST00000355460.6.1	101.73	127.227	32.4999	14.4864	19.5347	18.2256	13.7275	10.7751	2.23927	1.99098
chr3:186570661-186570862:+	DNAJB11	ENST00000439351.5	ENST00000439351.5.1	189.868	272.154	16.7376	13.6837	27.9727	29.4446	15.4108	33.3022	3.74327	2.13155
chr3:196503548-196503614:-	RNF168	ENST00000318037.3	ENST00000318037.3.1	7.46067	33.7255	14.6818	8.56644	9.55955	26.395	8.15341	9.66797	0.400219	0.246385
chr4:39366298-39366319:-	RFC1	ENST00000381897.5	ENST00000381897.5.1	101.73	183.328	70.0664	39.0325	141.336	50.3608	83.5402	77.1597	1.28388	0.512137
chr4:41990503-41990632:+	SLC30A9	ENST00000264451.11	ENST00000264451.11.1	14.7289	7.77537	7.25882	10.5037	13.5086	41.2085	6.44017	11.5966	0.378504	-0.272344
chr4:39527314-39527500:-	UGDH	ENST00000316423.10	ENST00000316423.10.1	93.3354	103.852	9.82608	17.9128	8.14939	22.9845	7.26431	11.9967	4.0965	2.23398
chr4:75630141-75630276:-	CDKL2	ENST00000429927.6	ENST00000429927.6.1	5.19707	5.67508	1.72414	2.26809	6.57007	6.20685	6.22406	6.60524	0.27572	-0.782313
chr4:82900166-82900435:-	SEC31A	ENST00000355196.6	ENST00000355196.6.1	9.20883	30.3599	15.4179	5.85937	61.4183	97.0375	54.7246	37.2695	0.0727465	-2.14919
chr4:104491977-104492040:-	CXXC4	ENST00000394767.2	ENST00000394767.2.1	21.9853	5.11895	3.60465	14.4612	18.3254	8.81028	7.91378	9.51378	0.438034	-0.0907065
chr4:145180009-145180147:-	OTUD4	ENST00000447906.7	ENST00000447906.7.1	21.9853	10.3502	3.65517	23.5236	9.81928	29.8267	19.6678	16.3843	0.837176	0.0729957
chr4:155667205-155696947:+	GUCY1A3	ENST00000393832.7	ENST00000393832.7.1	2.61517	3.47137	3.89655	1.98616	2.53752	2.37465	2.81349	2.38745	0.257341	0.235517
chr4:183099457-183099499:+	WWC2	ENST00000403733.7	ENST00000403733.7.1	21.9853	52.4258	15.3181	19.5671	38.2497	56.5944	35.3411	45.7962	0.202702	-0.760095
chr5:5422785-5422881:+	ICE1	ENST00000296564.8	ENST00000296564.8.1	15.5365	5.66723	17.38	13.8593	15.5934	74.6676	24.5034	43.6708	0.353886	-0.930367
chr5:61161109-61161196:-	SMIM15	ENST00000339020.7	ENST00000339020.7.1	3.42275	3.47137	1.76562	1.98616	3.76226	2.83294	5.1856	3.24032	0.330156	-0.373067
chr5:57175831-57175858:+	GPBP1	ENST00000424459.7	ENST00000424459.7.1	59.7589	89.8264	39.1817	131.81	58.174	89.5392	66.3373	71.2289	0.457193	0.160796
chr5:62306472-62308343:+	KIF2A	ENST00000381103.6	ENST00000381103.6.1	80.7443	141.252	24.3333	22.1233	89.1928	33.78	35.101	46.1842	1.51829	0.645949
chr5:64768954-64768993:+	CWC27	ENST00000381070.7	ENST00000381070.7.1	63.956	47.7508	23.75	72.9024	59.9065	51.8754	75.2297	53.7462	0.379911	-0.128075
chr5:65624828-65624951:+	TRAPPC13	ENST00000399438.7	ENST00000399438.7.1	76.5472	14.1807	8.69999	7.4012	23.8255	20.2956	8.50646	10.4552	1.0487	0.496253
chr5:77030624-77030723:+	AGGF1	ENST00000312916.11	ENST00000312916.11.1	9.07584	7.59033	7.01999	7.70921	7.62221	22.406	3.98878	8.17977	0.51014	0.081299
chr5:77077874-77078689:-	ZBED3	ENST00000255198.2	ENST00000255198.2.1	0.519097	0.548308	1.68478	1.63585	0.837514	0.551266	0.956113	0.554992	0.889927	0.660854
chr5:90529456-90529525:-	LYSMD3	ENST00000315948.10	ENST00000315948.10.1	59.7589	6.4203	15.1628	26.5155	7.97445	17.1991	11.7582	14.9316	2.79433	1.45054
chr5:138021109-138021157:-	FAM13B	ENST00000033079.7	ENST00000033079.7.1	51.3648	14.1807	14.0454	16.7149	4.85136	9.52595	12.7019	5.82908	3.85238	2.00447
chr5:138542936-138543204:-	ETF1	ENST00000360541.9	ENST00000360541.9.1	17.9593	159.953	18.3521	17.4949	16.9487	60.4573	27.4799	26.7312	0.818173	0.329885
chr5:140564843-140566762:+	SLC35A4	ENST00000323146.7	ENST00000323146.7.1	0.822037	2.12651	0.594203	0.28184	0.0766473	0.133215	0.0475446	0.0492333	3.69367	3.48897
chr5:141320513-141320723:-	TAF7	ENST00000313368.7	ENST00000313368.7.1	7.21696	46.3085	22.8053	17.9299	20.1051	16.4959	19.341	30.269	0.95598	0.303839
chr5:147671902-147782553:-	JAKMIP2	ENST00000265272.9	ENST00000265272.9.1	26.1824	5.11895	6.0465	10.8692	4.85136	5.71171	3.26819	4.81627	1.68862	1.37851
chr5:176238508-176261111:+	SIMC1	ENST00000443967.5	ENST00000443967.5.1	72.3501	66.4511	22.6363	36.7418	18.6386	55.908	34.8128	19.5577	1.22432	0.925846
chr5:176361647-176361710:-	KIAA1191	ENST00000298569.8	ENST00000298569.8.1	4.12743	7.59033	8.16278	1.27542	2.16546	2.79761	1.83363	1.34062	1.28506	1.32513
chr5:173328349-173328385:-	STC2	ENST00000265087.8	ENST00000265087.8.1	24.4694	173.978	125.055	50.7374	79.8308	35.3175	138.915	84.0775	1.88352	0.751959
chr5:180851346-180851466:-	ZFP62	ENST00000512132.5	ENST00000512132.5.1	17.7883	6.76654	12.6666	6.43231	4.36994	4.11527	11.3707	7.5011	1.27276	0.942295
chr6:7389889-7389952:+	RIOK1	ENST00000379834.6	ENST00000379834.6.1	16.3441	220.729	65.9089	30.8976	11.2419	40.713	37.6868	24.0239	1.70776	1.30895
chr6:24719329-24719554:-	C6orf62	ENST00000378119.8	ENST00000378119.8.2	1.80758	1.82379	1.38889	3.16641	2.55208	0.741217	0.705704	0.811036	1.14417	1.17649
chr6:35281122-35281179:+	ZNF76	ENST00000373953.7	ENST00000373953.7.1	4.5742	5.11895	7.71999	7.25851	13.9978	9.75032	7.67366	7.66231	0.284925	-0.511936
chr6:35411046-35421847:+	PPARD	ENST00000311565.4	ENST00000311565.4.1	3.42275	15.0252	2.20312	1.53791	2.6773	3.93202	1.79178	1.64261	1.16488	0.861065
chr6:34392524-34392644:-	NUDT3	ENST00000607016.1	ENST00000607016.1.1	1.89355	19.7003	2.4	1.7358	11.1447	20.5362	6.89147	4.09928	0.294257	-1.07331
chr6:53065601-53065673:+	FBXO9	ENST00000323557.11	ENST00000323557.11.1	6.24973	3.61041	2.56081	1.19259	4.11992	2.62521	2.06217	1.11006	0.163573	0.380835
chr6:127343373-127343427:-	ECHDC1	ENST00000454859.7	ENST00000454859.7.1	12.3062	26.5375	19.5581	29.1633	47.602	177.392	29.0004	63.3315	0.200539	-1.37425
chr6:133241609-133241675:+	EYA4	ENST00000367895.9	ENST00000367895.9.1	47.1677	61.776	5.15625	7.88198	13.0355	14.6864	8.50733	6.89157	1.54463	1.2592
chr6:152975614-152983469:-	FBXO5	ENST00000367241.3	ENST00000367241.3.1	12.6451	4.43871	6.4416	8.06366	4.07017	5.92929	8.54507	5.42232	0.961887	0.607943
chr6:159790513-159790549:+	MRPL18	ENST00000367034.4	ENST00000367034.4.1	76.5472	145.927	17.2436	26.6305	18.478	39.1163	15.9401	21.4145	1.39577	1.35029
chr7:17940324-17940483:-	SNX13	ENST00000428135.7	ENST00000428135.7.1	1.92642	38.4006	3.73437	6.68704	4.12645	9.31436	5.52237	7.01296	1.49259	0.63676
chr7:35253937-35253970:-	TBX20	ENST00000408931.3	ENST00000408931.3.1	13.5912	15.0252	8.46664	19.1922	13.9941	5.04977	16.0778	18.6295	0.943804	0.460335
chr7:35694433-35694487:-	HERPUD2	ENST00000396081.5	ENST00000396081.5.1	26.1824	5.11895	6.86046	13.3639	4.93255	7.5035	8.90683	11.4333	1.92885	0.987212
chr7:66205482-66240404:+	TPST1	ENST00000304842.5	ENST00000304842.5.1	9.39413	5.94275	8.24136	6.53638	4.49437	4.80671	5.30173	8.24251	0.472782	0.504371
chr7:64679198-64691247:+	ZNF107	ENST00000344930.7	ENST00000344930.7.1	10.691	29.0505	6.2093	6.03709	13.0468	11.7696	6.0067	6.84636	0.678521	0.379404
chr7:72879425-72879524:+	POM121	ENST00000395270.5	ENST00000395270.5.1	1.89355	3.47137	6.0909	2.95685	4.85136	3.01154	9.3585	13.4273	0.352211	-0.728541
chr7:75073752-75073776:-	WBSCR16	ENST00000610322.4	ENST00000610322.4.1	59.7589	5.11895	22.4666	21.4239	61.6391	69.635	16.2055	50.9987	0.503472	-0.489318
chr7:83648741-83648792:-	SEMA3E	ENST00000643230.1	ENST00000643230.1.1	21.9853	5.94275	7.75861	6.87056	46.0462	9.30158	8.95809	16.4796	0.173824	-0.737343
chr7:99408834-99408885:+	BUD31	ENST00000403633.6	ENST00000403633.6.1	68.1531	18.2996	12.4844	5.87489	27.7188	28.5971	7.82874	5.15616	0.669126	0.544167
chr7:98881102-98881126:+	TRRAP	ENST00000355540.7	ENST00000355540.7.1	496.254	449.807	171.227	204.31	423.741	404.574	208.082	230.482	0.146658	-0.00279474
chr7:108569625-108569682:-	THAP5	ENST00000415914.3	ENST00000415914.3.1	5.91453	3.71015	17.8636	16.6463	11.1447	19.8468	10.7353	20.9729	0.546527	-0.333079
chr7:105532286-105536573:+	RINT1	ENST00000257700.6	ENST00000257700.6.1	7.70163	5.27158	14.72	14.2786	5.9075	15.6624	14.2748	13.6218	0.359174	-0.104819
chr7:103344697-103344754:-	DNAJC2	ENST00000379263.7	ENST00000379263.7.1	101.73	131.902	16.54	45.3833	17.3683	60.0155	32.7567	46.9744	2.09994	1.25188
chr7:129054849-129054888:-	TNPO3	ENST00000265388.9	ENST00000265388.9.1	215.05	173.978	33.7209	20.893	72.4826	132.779	35.9542	35.023	0.909834	0.538945
chr7:134646838-134661464:+	BPGM	ENST00000344924.7	ENST00000344924.7.1	1.80758	2.80677	4.36	2.67245	4.08724	3.01017	2.73488	3.98506	0.431494	-0.136255
chr8:17247067-17247109:+	VPS37A	ENST00000324849.8	ENST00000324849.8.1	13.5912	24.3754	8.95452	9.8194	8.89093	30.5131	16.5856	16.022	0.391784	-0.200799
chr8:43097556-43102538:+	POMK	ENST00000331373.9	ENST00000331373.9.1	4.39688	6.4203	8.30434	5.72184	12.3217	6.03874	6.38692	3.70081	0.443923	0.0929989
chr8:55762965-55763007:-	TMEM68	ENST00000334667.6	ENST00000334667.6.1	5.19707	33.7255	4.09302	7.4985	6.57007	7.07466	2.52333	10.4168	1.65057	0.981857
chr8:109540190-109540424:+	EBAG9	ENST00000337573.9	ENST00000337573.9.1	17.7883	19.7003	3.52777	5.33282	4.49218	12.8031	3.78736	5.16044	1.23063	0.899834
chr8:120811833-120813121:-	SNTB1	ENST00000395601.7	ENST00000395601.7.1	9.39413	19.7003	4.31579	18.1746	9.55955	16.0997	8.66491	10.3367	0.453784	0.157908
chr8:123347259-123356434:-	ATAD2	ENST00000521903.5	ENST00000521903.5.1	5.96933	6.35677	6.85789	6.3194	3.61703	4.8889	5.19036	5.44382	0.179597	0.44167
chr9:34179060-34179147:+	UBAP1	ENST00000297661.8	ENST00000297661.8.1	97.5325	17.4758	16.9535	22.5352	18.4361	66.2033	9.74217	10.6219	1.83172	1.23512
chr9:38068784-38068904:-	SHB	ENST00000377707.3	ENST00000377707.3.1	2.34033	47.7508	7.51162	6.82033	25.2556	15.6521	7.86103	11.4205	1.12604	0.231484
chr9:38392734-38395780:+	ALDH1B1	ENST00000377698.3	ENST00000377698.3.1	10.691	15.8282	16.4	10.7495	16.1112	9.29189	12.3214	14.2453	0.426201	0.154661
chr9:35732635-35732824:+	CREB3	ENST00000353704.2	ENST00000353704.2.1	2.88757	43.0757	2.68518	5.84116	2.982	4.36418	2.77316	4.73579	3.81794	1.70491
chr9:95875916-95880940:+	ERCC6L2	ENST00000288985.11	ENST00000288985.11.1	3.23388	1.6223	3.82456	4.54528	1.15662	2.1759	2.19551	2.93696	0.730892	0.772127
chr9:93453254-93453491:-	FAM120AOS	ENST00000375412.9	ENST00000375412.9.1	5.19707	0.176209	0.517242	0.675026	1	1.70947	1.91059	2.37419	2.15659	0.549715
chr9:96777684-96777828:-	ZNF510	ENST00000375231.5	ENST00000375231.5.1	93.3354	15.8282	15.2414	70.3035	15.7266	33.2585	14.1646	17.5915	2.21429	1.52146
chr9:105244803-105244827:+	SLC44A1	ENST00000374724.1	ENST00000374724.1.1	51.3648	117.877	37.3999	10.0993	58.5574	188.374	23.9931	27.0035	0.441487	-0.219394
chr9:105574979-105575033:+	FKTN	ENST00000223528.6	ENST00000223528.6.1	9.88342	43.0757	6.37209	3.18476	4.89967	2.09983	2.84986	5.25218	8.20526	2.66524
chr9:107489437-107489620:-	KLF4	ENST00000374672.4	ENST00000374672.4.1	7.46067	3.47137	7.38596	19.3873	11.2118	11.9891	11.4717	17.2536	0.296149	-0.555076
chr9:112297861-112333477:-	PTBP3	ENST00000374257.5	ENST00000374257.5.1	12.3062	5.35608	8.88732	13.7195	11.8879	9.99589	15.0808	10.4242	0.322787	-0.202385
chr9:128127843-128128413:-	PTGES2	ENST00000338961.10	ENST00000338961.10.1	5.8455	29.0505	8.36841	8.23541	13.5114	10.9236	15.0002	10.8729	0.906699	0.139919
chr9:128702572-128702839:+	PKN3	ENST00000291906.4	ENST00000291906.4.1	51.3648	3.25846	20.409	14.7206	10.7005	19.8025	10.6478	18.973	1.78089	0.93685
chr9:128886027-128886105:+	LRRC8A	ENST00000372600.8	ENST00000372600.8.1	13.1138	71.1261	9.8421	8.48068	17.0861	15.4831	12.8073	11.8993	1.66476	0.774521
chr9:125707113-125707143:-	MAPKAP1	ENST00000373511.6	ENST00000373511.6.1	38.7736	24.3754	5.33999	6.2383	22.1825	18.4089	7.68271	11.8504	0.489942	0.102166
chr9:135484056-135484455:+	PPP1R26	ENST00000605286.5	ENST00000605286.5.1	5.91453	4.29516	15	5.46226	24.3894	6.83354	11.8892	7.6317	0.363839	-0.489836
chr9:131530631-131531196:-	UCK1	ENST00000372215.4	ENST00000372215.4.1	30.3795	89.8264	5.96063	5.95223	4.43623	6.09825	6.52207	8.95122	5.72458	2.53336
chr9:136116980-136118602:-	C9orf69	ENST00000418388.5	ENST00000418388.5.1	0.764054	1	0.416667	0.72045	0.243655	0.584976	0.292004	0.645211	0.772958	0.885342
chr9:134025862-134025988:+	RP11-374P20.5	ENST00000603928.2	ENST00000603928.2.1	9.39413	1	0.156029	0.315815	0.222855	0.149297	0.252299	0.128779	16.9868	3.69829
chr10:22321234-22321324:+	BMI1	ENST00000376663.7	ENST00000376663.7.1	13.1138	9.23791	19.7727	20.3384	19.625	25.5557	26.5602	14.6176	0.374889	-0.337561
chr10:18651382-18651448:-	NSUN6	ENST00000377304.6	ENST00000377304.6.1	34.5765	19.7003	5.27777	17.2463	6.38935	11.9816	12.6232	14.901	1.92862	1.10958
chr10:28535610-28590796:+	WAC	ENST00000375664.8	ENST00000375664.8.1	1.89882	2.30238	2.03779	1.67494	2.25069	2.11491	2.16406	2.67781	0.168319	-0.192873
chr10:68721250-68722467:+	CCAR1	ENST00000265872.10	ENST00000265872.10.1	29.5936	61.9605	31.6923	22.4523	34.3174	61.7095	35.6718	35.7315	0.136401	-0.241603
chr10:92291216-92311190:+	MARCH5	ENST00000358935.2	ENST00000358935.2.1	7.25485	2.44837	3.2037	3.32007	3.88882	3.46221	3.27324	3.9527	0.453518	0.134695
chr10:96832302-96833452:+	LCOR	ENST00000421806.3	ENST00000421806.3.1	13.1138	7.77537	18.907	7.84185	21.2197	12.4698	11.6997	9.4053	0.409555	-0.115862
chr10:98443214-98445396:-	HPS1	ENST00000325103.10	ENST00000325103.10.1	5.19707	1	6.44444	3.71616	7.01431	2.74333	6.89147	6.5627	0.210991	-0.617703
chr10:100987823-100987892:+	TWNK	ENST00000370228.2	ENST00000370228.2.1	19.5744	38.4006	35.0665	7.79512	12.6043	7.28228	8.70659	7.1954	1.7313	1.57738
chr10:99659877-99659928:+	ENTPD7	ENST00000370489.4	ENST00000370489.4.1	26.1824	33.7255	7.03447	2.52407	12.7948	7.34972	6.94421	5.00652	1.57396	1.02718
chr10:114174042-114174087:-	CCDC186	ENST00000369287.7	ENST00000369287.7.1	76.5472	9.58214	35.0665	27.63	18.7531	53.9104	39.2401	31.0264	1.51269	0.595443
chr11:2400608-2400794:+	TSSC4	ENST00000380996.9	ENST00000380996.9.1	3.68065	4.61353	5.43662	2.322	8.94344	6.60918	3.3623	6.59177	0.506328	-0.377637
chr11:7020077-7020116:-	ZNF214	ENST00000278314.4	ENST00000278314.4.1	13.5912	1.82379	1.48276	13.9944	2.39252	8.54985	5.30795	4.58735	2.25997	1.2054
chr11:7252173-7303165:+	SYT9	ENST00000318881.10	ENST00000318881.10.1	1.89355	19.7003	2.96875	3.2364	2.52041	2.30925	2.47369	2.82712	3.25177	1.53944
chr11:13349986-13350007:+	ARNTL	ENST00000401424.5	ENST00000401424.5.1	1	19.7003	2.93103	4.48726	7.96259	9.92255	9.45321	7.77642	0.731367	-0.415959
chr11:61364355-61366169:+	TMEM138	ENST00000278826.10	ENST00000278826.10.1	1.89355	2.24459	2.16667	2.72778	1.43332	1.53155	1.25598	1.57202	0.176017	0.643153
chr11:64234537-64234792:+	VEGFB	ENST00000309422.6	ENST00000309422.6.1	1	3.47137	0.461539	0.5076	0.543878	0.702757	0.467228	0.563003	1.64219	1.11565
chr11:65041010-65041058:+	SAC3D1	ENST00000531072.1	ENST00000531072.1.1	5.8455	47.7508	20.0909	8.26831	7.66193	9.42957	13.6718	25.5416	1.86905	0.929811
chr11:73981511-73983034:-	UCP2	ENST00000310473.7	ENST00000310473.7.1	1.44678	0.688852	1.58333	1.10924	0.462094	0.365548	0.305207	0.659865	1.39501	1.57096
chr11:83285968-83286172:-	CCDC90B	ENST00000529689.5	ENST00000529689.5.1	21.9853	38.4006	5.72092	3.59979	49.5112	14.462	8.21222	5.60452	0.897353	0.149993
chr11:94494005-94496639:+	ANKRD49	ENST00000544612.5	ENST00000544612.5.1	38.7736	3.25846	5.08333	12.6045	5.5735	4.84828	7.91378	11.7621	2.67336	1.22386
chr11:95924050-95924092:-	MTMR2	ENST00000346299.9	ENST00000346299.9.1	59.7589	15.8282	26.1363	32.5642	22.1825	55.1314	17.04	31.5625	0.875459	0.471609
chr11:124623042-124623087:+	TBRG1	ENST00000441174.7	ENST00000441174.7.1	5.8455	5.11895	4.71875	7.33579	3.65572	16.8731	3.94526	5.56093	0.484972	0.143263
chr12:14803426-14803465:-	WBP11	ENST00000261167.6	ENST00000261167.6.1	30.8806	23.2424	23.3023	20.8481	39.0424	49.8404	27.6428	23.0503	0.169293	-0.412767
chr12:45990414-45990441:-	SCAF11	ENST00000369367.7	ENST00000369367.7.1	257.021	496.558	48.4035	43.1658	143.965	146.213	96.947	45.2443	1.10402	0.730044
chr12:47964211-47964298:+	TMEM106C	ENST00000256686.10	ENST00000256686.10.1	2.90903	38.4006	4.22124	4.49735	3.77855	3.57595	4.14834	3.17047	4.19359	1.80163
chr12:49460794-49484661:+	SPATS2	ENST00000553127.5	ENST00000553127.5.1	26.1824	7.59033	5.06	9.14847	8.96182	3.78191	6.29214	8.70807	0.838245	0.761989
chr12:54183813-54183948:-	SMUG1	ENST00000513838.5	ENST00000513838.5.1	2.61517	1.93345	2.30232	2.59424	2.62486	3.24367	2.52038	3.39003	0.152436	-0.290218
chr12:56216532-56216574:-	RNF41	ENST00000345093.8	ENST00000345093.8.1	4.23033	6.76654	5.89999	4.04814	3.84017	6.91227	7.69573	7.93008	0.224552	-0.252547
chr12:96400192-96400222:-	CDK17	ENST00000261211.7	ENST00000261211.7.1	10.691	19.1234	14.0278	7.55427	30.1659	53.5034	31.3126	24.3855	0.0502062	-1.44457
chr12:107685781-107685889:+	PWP1	ENST00000412830.7	ENST00000412830.7.1	8.55027	9.08986	10.7559	10.815	14.8222	26.4375	15.0696	15.8578	0.144982	-0.788096
chr12:107760610-107761008:-	PRDM4	ENST00000228437.9	ENST00000228437.9.1	4.5742	2.80677	7.57999	7.20836	10.6284	6.73023	11.182	10.4702	0.129871	-0.853506
chr12:110583230-110583302:-	PPTC7	ENST00000354300.4	ENST00000354300.4.1	21.9853	1	3.65517	6.70642	13.9968	9.67809	5.07953	13.2289	0.536032	-0.463648
chr12:111842236-111842371:+	MAPKAPK5	ENST00000550735.6	ENST00000550735.6.1	8.26825	33.7255	2.42187	13.0686	4.31111	7.36393	6.34306	5.90338	1.5023	1.1848
chr12:118016827-118017690:+	RFC5	ENST00000392542.6	ENST00000392542.6.1	32.4958	13.6474	7.04734	10.973	10.9303	15.1337	10.3916	10.0307	0.913329	0.497457
chr12:120534696-120534957:+	RNF10	ENST00000325954.8	ENST00000325954.8.1	11.4986	11.7093	12.8276	9.7305	5.03429	10.3872	7.27204	8.56956	0.482718	0.657815
chr12:120687179-120687227:+	MLEC	ENST00000228506.7	ENST00000228506.7.1	7.25485	13.3569	11.7187	9.21022	12.8476	22.0541	6.98333	14.729	0.467973	-0.20351
chr12:124863595-124863901:-	SCARB1	ENST00000339570.9	ENST00000339570.9.1	5.46775	43.0757	11.8889	7.49948	9.47432	7.10981	10.3533	9.72151	2.27237	1.09685
chr12:122483446-122492734:-	ZCCHC8	ENST00000543897.5	ENST00000543897.5.1	6.24973	3.67839	5.82432	6.69062	4.49694	5.98157	6.65042	8.76525	0.291514	-0.134547
chr13:39037785-39037938:-	PROSER1	ENST00000352251.7	ENST00000352251.7.1	3.23388	4.61353	2.75	2.08725	14.7205	13.0946	7.76052	10.5647	0.0727815	-1.83144
chr13:52024717-52028590:+	UTP14C	ENST00000521776.2	ENST00000521776.2.1	1	0.377703	1.14894	0.751915	0.619898	0.673766	0.728154	0.485323	0.442049	0.406247
chr13:71867109-71867181:-	DACH1	ENST00000613252.4	ENST00000613252.4.1	14.7289	4.11148	6.8169	9.24674	13.9984	27.8622	13.459	14.5754	0.32335	-0.773087
chr13:97275991-97276057:+	MBNL2	ENST00000397601.5	ENST00000397601.5.1	30.3795	61.776	17.4138	33.0283	16.5929	6.20685	15.7931	11.0731	3.52019	1.98815
chr13:113491127-113495505:+	TMCO3	ENST00000434316.6	ENST00000434316.6.1	1	33.7255	6.79309	9.2426	11.7787	23.8523	12.5476	24.4581	0.495101	-0.72612
chr14:20329246-20329366:-	CCNB1IP1	ENST00000358932.8	ENST00000358932.8.1	1.96181	1.41586	1.08861	0.704867	0.50635	1.32111	0.247759	0.314819	1.31913	1.53343
chr14:24141267-24141547:-	EMC9	ENST00000216799.8	ENST00000216799.8.1	2.65162	1.93345	2.73759	2.7366	3.94941	6.4982	2.18991	2.71559	0.358667	-0.309914
chr14:28767104-28767299:+	FOXG1	ENST00000313071.6	ENST00000313071.6.1	7.46067	61.776	8.72412	9.66563	9.24253	11.4137	6.74751	24.6986	2.00953	0.98257
chr14:50668148-50668271:-	SAV1	ENST00000324679.4	ENST00000324679.4.1	1	1	1.49495	3.76228	2.09237	5.76454	2.25087	2.8853	0.413653	-0.610702
chr14:57268838-57268874:-	EXOC5	ENST00000621441.4	ENST00000621441.4.1	17.7883	43.0757	8.9655	14.9254	34.7846	36.4093	7.49283	16.5494	0.278301	-0.0767014
chr14:57269195-57269291:+	AP5M1	ENST00000261558.7	ENST00000261558.7.1	8.26825	8.41412	5.47999	7.86751	15.8535	6.4982	4.31405	6.4633	0.321329	0.105646
chr14:69398689-69398821:+	SLC39A9	ENST00000556605.5	ENST00000556605.5.1	1.92642	29.0505	3.33333	1.44067	13.2762	6.73779	3.39102	4.23259	1.68379	0.531078
chr14:70342694-70359603:-	COX16	ENST00000389912.6	ENST00000389912.6.1	7.46067	2.24459	4.18182	3.75341	1.55828	1.62449	1.78135	1.66082	1.26633	1.42989
chr14:77028549-77028597:-	IRF2BPL	ENST00000238647.4	ENST00000238647.4.1	6.80808	14.1807	7.38596	8.4744	43.4473	29.8972	55.9458	20.3417	0.152176	-1.76166
chr14:92121987-92122041:+	CPSF2	ENST00000298875.8	ENST00000298875.8.1	76.5472	99.1766	23.9444	26.6095	69.2334	110.077	40.2192	54.5367	0.244876	-0.372448
chr15:22838747-22838861:+	NIPA2	ENST00000337451.7	ENST00000337451.7.1	6.65309	0.176209	3.94737	5.05348	11.1098	7.02729	7.41349	3.51045	0.507532	-0.623748
chr15:50908720-50912112:+	AP4E1	ENST00000261842.9	ENST00000261842.9.1	2.34033	4.61353	9.20688	5.90536	7.40233	14.0171	5.19498	13.262	0.61207	-0.482551
chr15:68278130-68278184:+	FEM1B	ENST00000306917.4	ENST00000306917.4.1	122.715	11.8406	29	22.2858	20.7082	154.742	53.8904	72.6706	2.43848	0.775517
chr15:70097054-70097132:-	TLE3	ENST00000558939.5	ENST00000558939.5.1	19.5285	11.579	21.9239	17.233	30.4454	17.6268	18.9727	22.2493	0.207656	-0.309175
chr15:77252443-77252497:-	PEAK1	ENST00000560626.6	ENST00000560626.6.1	72.3501	47.7508	15.3181	24.2089	20.9723	36.8163	14.0731	27.4701	1.0328	0.747721
chr15:81001167-81001221:+	MESDC1	ENST00000267984.3	ENST00000267984.3.1	21.9853	1	2.13953	0.580674	2.92568	2.15708	1.83445	2.26299	3.00063	1.23283
chr15:81001260-81001410:+	MESDC1	ENST00000267984.3	ENST00000267984.3.2	4.23033	1	0.621622	0.315815	0.92398	0.788516	0.908196	1.65005	1.7159	0.748986
chr15:89088485-89088539:+	ABHD2	ENST00000352732.9	ENST00000352732.9.1	10.691	80.4763	22.7777	18.8736	77.5885	135.525	44.5943	29.9184	0.195711	-1.09448
chr16:53951-55489:+	SNRNP25	ENST00000293861.7	ENST00000293861.7.1	1.1909	1.45169	1	0.900766	0.880736	0.817707	0.957011	0.922541	0.315349	0.364238
chr16:689833-689917:-	WDR24	ENST00000293883.8	ENST00000293883.8.1	59.7589	38.4006	6.2093	3.06808	5.65624	10.2566	12.7898	16.0132	4.17628	1.90556
chr16:28491769-28491796:-	CLN3	ENST00000569430.6	ENST00000569430.6.1	72.3501	43.0757	13.25	8.63688	11.6706	10.2923	6.5808	9.88402	2.04514	1.7303
chr16:30700708-30704082:+	SRCAP	ENST00000262518.8	ENST00000262518.8.1	11.744	8.73456	14.2959	11.2249	7.14433	6.23572	7.79517	8.1652	0.188227	0.644598
chr16:47143754-47143856:-	NETO2	ENST00000562435.5	ENST00000562435.5.1	5.03792	19.7003	3.52777	1.49054	7.86748	5.31428	3.72306	7.00978	1.3704	0.461419
chr16:57204541-57204658:+	RSPRY1	ENST00000394420.8	ENST00000394420.8.1	51.3648	3.71015	5.21795	5.26027	8.95441	4.19537	5.13749	9.46947	2.13604	1.03417
chr16:66934549-66934678:+	CES2	ENST00000317091.8	ENST00000317091.8.1	9.39413	10.3502	3.44186	1.65543	2.92568	2.73562	1.80867	2.13759	1.16831	1.27379
chr16:67227148-67227879:+	TMEM208	ENST00000304800.13	ENST00000304800.13.1	10.3823	7.32368	6.43529	4.30499	5.80417	5.27687	3.54546	4.17533	0.322105	0.590429
chr16:67893275-67908685:+	PSKH1	ENST00000291041.5	ENST00000291041.5.1	17.7883	1	1.84	0.5076	1.1793	1.80462	0.911205	1.83758	6.15585	2.16458
chr16:70398784-70398952:-	ST3GAL2	ENST00000393640.8	ENST00000393640.8.1	2.61517	1	0.505051	1.58203	2.25797	1.73301	1.37753	1.87399	0.296503	-0.441211
chr16:70399325-70399433:-	ST3GAL2	ENST00000393640.8	ENST00000393640.8.2	13.5912	1	1	1.96285	3.88852	2.73562	2.96137	2.64439	1.31458	0.304717
chr16:75644452-75647639:-	KARS	ENST00000319410.9	ENST00000319410.9.1	46.2247	39.7182	15.5355	28.7148	18.9571	47.4761	18.0474	45.9082	0.72636	0.251348
chr16:70523834-70523873:+	SF3B3	ENST00000302516.9	ENST00000302516.9.1	65.8851	1249.25	178.442	229.933	555.686	518.214	377.974	353.241	0.885611	-0.131209
chr16:84102015-84102051:-	MBTPS1	ENST00000343411.7	ENST00000343411.7.1	110.124	99.1766	42.6817	48.2365	37.4573	34.2063	21.8513	26.1221	0.511465	1.26891
chr17:3668826-3668862:+	TMEM93	ENST00000248378.5	ENST00000248378.5.1	1.47189	4.29516	0.65407	0.501203	5.08059	2.94764	1.09365	1.11677	0.451415	-0.517812
chr17:15651674-15677212:-	TRIM16	ENST00000578237.5	ENST00000578237.5.1	0.691192	15.0252	1.63636	7.03432	1.92834	1.407	4.23096	2.39316	4.22432	1.84433
chr17:16380933-16380957:+	UBB	ENST00000302182.7	ENST00000302182.7.1	86.6039	304.88	361.265	305.976	560.612	420.36	553.892	932.761	0.233444	-1.10468
chr17:18314780-18314822:-	TOP3A	ENST00000321105.9	ENST00000321105.9.1	23.7855	155.278	47.1362	77.5895	49.7381	55.1314	54.7034	22.0865	1.27868	0.939106
chr17:18315568-18315607:+	SMCR8	ENST00000406438.4	ENST00000406438.4.1	51.3648	10.8855	44.7497	55.5765	59.0402	60.7125	43.0019	49.2051	0.373012	-0.313197
chr17:28339417-28339453:+	TNFAIP1	ENST00000226225.6	ENST00000226225.6.1	51.3648	5.94275	4.92	8.40809	5.26026	12.8915	3.87919	9.57531	3.86245	1.62902
chr17:30832278-30832320:+	ATAD5	ENST00000321990.4	ENST00000321990.4.1	13.9565	16.8092	12.6941	23.9326	13.89	58.8539	16.7431	19.0351	0.358676	-0.274979
chr17:32007988-32017986:+	LRRC37B	ENST00000543378.6	ENST00000543378.6.1	0.691192	1	0.805556	1.31702	0.80599	2.22101	1	0.585065	0.687804	0.125797
chr17:42824188-42824248:-	BECN1	ENST00000361523.8	ENST00000361523.8.1	47.1677	15.8282	15.6363	8.54786	17.1276	62.7715	12.6562	12.9787	0.949326	0.292821
chr17:47189181-47189250:-	CDC27	ENST00000066544.7	ENST00000066544.7.1	168.883	150.602	68.4544	26.8584	103.118	105.193	32.4418	62.4649	0.612915	0.487869
chr17:49707822-49708086:-	SLC35B1	ENST00000240333.10	ENST00000240333.10.1	5.95486	21.5948	7.8761	12.3607	15.5286	21.92	17.5702	33.0292	0.254126	-0.868318
chr17:58351501-58352135:-	SUPT4H1	ENST00000577396.5	ENST00000577396.5.1	5.8455	5.06522	4.11111	4.26888	2.61211	3.56977	5.14351	7.18532	0.639744	0.33633
chr17:59699157-59699898:-	PTRH2	ENST00000409433.2	ENST00000409433.2.1	1.75772	3.49334	5.75373	5.80245	14.4184	28.1212	36.4503	27.4267	0.0362098	-2.70006
chr17:77088764-77088881:+	SEC14L1	ENST00000392476.6	ENST00000392476.6.1	55.5619	12.5331	3.60177	7.28989	19.2369	22.9902	7.13924	13.2762	1.02006	0.165763
chr17:80013492-80013576:-	TBC1D16	ENST00000310924.6	ENST00000310924.6.1	13.5912	15.0252	9.27271	7.4985	10.1936	6.20685	7.39745	5.55647	0.48143	0.668361
chr17:81395488-81399608:+	BAHCC1	ENST00000584436.7	ENST00000584436.7.1	13.1138	9.23791	8.13999	7.01034	7.33517	10.7123	8.64666	19.7101	0.514164	-0.0191597
chr18:2571272-2571296:-	METTL4	ENST00000319888.10	ENST00000319888.10.1	5.19707	5.67508	12.2	7.73994	21.7905	21.5905	8.51598	13.2708	0.483326	-0.668193
chr18:59139642-59139930:+	SEC11C	ENST00000587834.5	ENST00000587834.5.1	42.9707	57.1009	38.5454	59.4865	26.8033	52.6894	70.7935	35.7509	0.45242	0.291398
chr18:57621772-57621820:-	NARS	ENST00000256854.9	ENST00000256854.9.1	128.598	477.858	126.125	166.075	211.502	182.064	115.355	137.583	0.751192	0.468098
chr19:893135-893162:-	MED16	ENST00000395808.7	ENST00000395808.7.1	5.46775	5.94275	9.79069	7.01034	6.70153	60.7125	12.8102	16.0958	0.288212	-0.920294
chr19:1911902-1912160:+	ADAT3	ENST00000329478.3	ENST00000329478.3.1	4.23033	15.0252	4.3793	4.36997	1.44825	1.46461	1.95583	2.1144	3.41408	2.1281
chr19:11529065-11529122:-	ECSIT	ENST00000270517.11	ENST00000270517.11.1	5.91453	38.4006	9.13952	9.90634	8.26828	10.7681	6.53617	14.5252	1.17595	0.669433
chr19:18557906-18562105:+	KXD1	ENST00000222307.8	ENST00000222307.8.1	2.21385	2.52483	2.45201	1.81513	1.33219	1.37398	1.2538	1.28643	0.20506	0.779484
chr19:36114934-36115024:-	POLR2I	ENST00000221859.8	ENST00000221859.8.1	3.5954	5.51692	5.88679	5.07218	4.61766	13.6523	11.1933	5.84186	0.187018	-0.634369
chr19:36589619-36589691:-	ZNF529	ENST00000586115.5	ENST00000586115.5.1	17.7883	15.0252	3.17241	3.13412	2.16406	4.47124	3.24821	3.74838	2.98613	1.74341
chr19:36236033-36236153:+	ZNF146	ENST00000443387.2	ENST00000443387.2.1	3.27315	6.91182	10.5068	10.7174	4.75487	3.15029	8.34732	10.3279	0.557618	0.372622
chr19:36236265-36236337:+	ZNF146	ENST00000443387.2	ENST00000443387.2.2	5.77258	18.2996	16.9022	12.3127	10.3473	9.31012	9.69401	12.3726	0.566221	0.395657
chr19:39168229-39168271:+	PAK4	ENST00000599386.5	ENST00000599386.5.1	6.42675	6.87199	9.0566	6.01133	16.0614	10.834	5.10692	4.48047	0.548377	0.0529394
chr19:40800522-40800603:+	EGLN2	ENST00000303961.8	ENST00000303961.8.1	7.70163	57.1009	2.47368	2.36541	4.52846	7.38526	4.81098	3.7981	2.97474	1.40182
chr19:41268222-41272087:+	HNRNPUL1	ENST00000352456.7	ENST00000352456.7.1	13.5464	10.8984	9.07045	9.71156	8.29842	5.97382	9.68948	11.3394	0.422494	0.392134
chr19:43596714-43597139:+	ZNF576	ENST00000336564.4	ENST00000336564.4.1	1.95452	1.12174	2.38272	1.5563	1.84349	1.52018	2.87594	3.19965	0.205452	-0.361683
chr19:48872553-48872634:+	PPP1R15A	ENST00000200453.5	ENST00000200453.5.1	47.0323	24.9584	6.46341	7.99907	6.05492	7.7803	4.64609	3.56448	2.46115	1.86896
chr19:49929358-49929397:-	IL4I1	ENST00000595948.5	ENST00000595948.5.1	0.073577	1	0.211268	0.103488	0.277869	0.290527	0.285099	0.117451	1.23932	0.413855
chr19:55599465-55599495:-	FIZ1	ENST00000590714.1	ENST00000590714.1.1	5.19707	1.82379	3.86363	3.21916	5.17755	3.7454	3.76551	3.94902	0.215932	-0.263634
chr19:56601558-56621291:+	ZNF71	ENST00000328070.10	ENST00000328070.10.1	38.7736	29.0505	4.28125	4.49438	5.09208	3.54795	8.62616	3.63458	3.53294	2.13219
chr19:57389920-57390004:+	ZNF548	ENST00000366197.9	ENST00000366197.9.1	17.1517	85.1514	26.4545	17.5737	17.246	33.2585	29.5296	16.4796	0.684547	0.463903
chr19:57559747-57559786:-	ZNF550	ENST00000601415.5	ENST00000601415.5.1	5.19707	10.3502	1.77778	2.68498	3.59882	1.81401	2.05665	1.1548	1.87539	1.37006
chr20:325669-325732:+	SOX12	ENST00000342665.4	ENST00000342665.4.1	26.1824	61.776	4.41025	5.78273	3.42058	14.8849	7.07666	4.71899	2.78843	1.77117
chr20:10420545-10420737:-	MKKS	ENST00000347364.7	ENST00000347364.7.1	0.528108	0.52538	0.464481	0.738963	0.336437	0.251735	0.256636	0.245573	0.545583	1.08334
chr20:44521993-44522038:-	SERINC3	ENST00000342374.4	ENST00000342374.4.1	9.93551	113.202	17.52	7.93312	44.0871	34.7	15.4842	15.4177	1.18846	0.359994
chr21:36699296-36699383:+	SIM2	ENST00000290399.10	ENST00000290399.10.1	5.8455	19.7003	2.8421	3.33093	5.26822	5.71171	3.90825	4.0954	1.12001	0.608627
chr21:46318040-46322905:-	C21orf58	ENST00000291691.11	ENST00000291691.11.1	0.555091	0.83907	0.573604	0.622698	0.228836	0.287096	0.559747	0.568097	0.826155	0.900953
chr21:46636928-46644318:+	PRMT2	ENST00000355680.7	ENST00000355680.7.1	21.9853	10.8855	3.82456	4.41222	5.33311	14.462	4.30494	4.77543	1.41627	0.741461
chr22:21000770-21002150:-	THAP7	ENST00000399133.2	ENST00000399133.2.1	1.6412	1.76718	1.77778	1.88133	1.04514	1.16974	1.12114	1.15492	0.0423474	0.654375
chr22:20917764-20917812:+	CRKL	ENST00000354336.7	ENST00000354336.7.1	21.1896	16.652	11.8889	13.293	31.2224	27.872	23.289	62.376	0.175949	-1.0002
chr22:26481762-26481792:-	HPS4	ENST00000398145.6	ENST00000398145.6.1	3.42275	3.71015	8.24136	12.6045	7.02339	7.59705	8.62616	4.95186	0.845292	0.162369
chr22:28883593-28883683:+	ZNRF3	ENST00000544604.6	ENST00000544604.6.1	9.39413	24.3754	8.9655	11.4618	19.1917	7.6532	10.5064	9.20419	1.04049	0.529344
chr22:40400700-40400757:+	SGSM3	ENST00000248929.13	ENST00000248929.13.1	9.07584	85.1514	14.2222	8.53741	10.1759	13.2348	9.32309	9.14148	2.31583	1.2906
chr22:41092589-41092703:+	EP300	ENST00000263253.8	ENST00000263253.8.1	78.528	49.7827	42.4531	49.3178	72.0095	79.9814	41.0344	42.9282	0.207014	-0.0378707
chr22:50294745-50307627:-	PLXNB2	ENST00000449103.5	ENST00000449103.5.1	13.2692	57.8416	12.5294	24.3383	41.2908	24.7744	23.4428	28.0543	0.786682	0.0208031
chrX:13735071-13740108:+	OFD1	ENST00000380567.5	ENST00000380567.5.1	3.77927	14.0991	5.95283	9.33666	8.35802	5.57419	6.59308	8.84111	0.779498	0.304645
chrX:17746075-17749445:+	SCML1	ENST00000380045.7	ENST00000380045.7.1	6.3613	5.35608	6.78261	6.1299	8.30904	2.74895	5.95387	4.83431	0.427597	0.356479
chrX:23783277-23783367:+	SAT1	ENST00000379270.4	ENST00000379270.4.1	8.52081	13.2749	5.00872	2.73678	3.97133	2.59092	2.36163	1.62878	1.3728	1.46863
chrX:38033670-38033766:+	SYTL5	ENST00000297875.6	ENST00000297875.6.1	9.39413	29.0505	4.4186	8.29154	9.3551	9.38882	4.63408	7.9739	0.907674	0.606836
chrX:38327440-38327485:-	RPGR	ENST00000318842.11	ENST00000318842.11.1	13.5912	3.47137	6.72726	11.6761	7.34041	19.3152	7.02433	28.4558	0.643682	-0.234756
chrX:154092264-154097665:-	MECP2	ENST00000303391.10	ENST00000303391.10.1	59.7589	5.11895	6.2807	4.92429	4.38636	3.96078	5.87788	6.47407	5.45199	2.06569
chrX:153447877-153454493:-	TREX2	ENST00000370232.3	ENST00000370232.3.1	1	0.176209	0.0707969	0.0714571	0.113682	0.0942605	0.07784	0.0876863	3.31601	1.63114
chr1:3856991-3857192:-	CEP104	ENST00000378230.7	ENST00000378230.7.1	4.5742	8.41412	4.10377	8.64664	6.81031	24.7201	9.73012	7.99133	0.288654	-0.668984
chr1:6349848-6393925:-	ACOT7	ENST00000361521.8	ENST00000361521.8.1	12.3254	33.1278	8.1327	17.455	9.96704	15.6651	8.88923	17.6116	0.477161	0.394341
chr1:38991223-38998204:+	AKIRIN1	ENST00000432648.7	ENST00000432648.7.1	1.55262	3.61041	1.40339	1.86836	1.78195	2.72039	1.57124	1.91148	0.183252	0.0247042
chr1:51236326-51236431:+	RNF11	ENST00000242719.3	ENST00000242719.3.1	5.19707	1	0.835294	2.9257	3.51594	20.9042	2.74299	3.12635	0.557349	-0.532033
chr1:224616789-224617062:+	CNIH3	ENST00000272133.3	ENST00000272133.3.1	1	5.67508	1.32558	2.26809	2.5851	2.22101	1.70392	1.16051	0.873763	0.504458
chr2:24084306-24084753:-	TP53I3	ENST00000335934.8	ENST00000335934.8.1	3.42275	5.67508	5.19998	5.17761	9.66272	3.81615	10.774	8.27541	0.443366	-0.439459
chr2:27370638-27370668:+	SNX17	ENST00000233575.6	ENST00000233575.6.1	84.9413	117.877	61.6664	20.0131	177.72	100.716	38.1642	41.7129	0.483487	-0.0954408
chr2:31234411-31234471:+	EHD3	ENST00000322054.9	ENST00000322054.9.1	9.39413	1	14.1249	3.59888	10.2834	16.7861	12.8469	7.22698	0.400928	-0.637921
chr2:112645944-112645989:+	SLC20A1	ENST00000272542.7	ENST00000272542.7.2	17.9593	117.877	147.124	44.5689	37.8619	55.9699	78.0756	124.99	0.794855	0.269443
chr2:130181753-130182065:-	SMPD4	ENST00000409031.5	ENST00000409031.5.1	5.94092	61.776	37.8665	16.887	30.1659	11.3259	13.0449	15.6358	2.01108	1.26816
chr2:188974383-188984766:+	COL3A1	ENST00000304636.7	ENST00000304636.7.1	1	5.67508	2.74999	1.86629	6.19763	4.43175	1.359	1.57802	0.662955	0.21665
chr3:37861975-37862230:+	CTDSPL	ENST00000443503.6	ENST00000443503.6.1	13.5912	15.0252	2.5909	2.73259	2.73254	7.8635	1.76365	3.54688	1.60698	1.18968
chr3:48989958-48990291:+	P4HTM	ENST00000383729.8	ENST00000383729.8.1	4.0673	8.41412	13.7931	8.96719	11.6706	9.20817	7.68734	8.15055	0.516387	0.0554487
chr3:49747825-49748086:-	IP6K1	ENST00000321599.8	ENST00000321599.8.1	5.94092	8.41412	6.30303	7.00608	8.42815	11.4685	9.69796	6.9723	0.137006	-0.370832
chr3:133661113-133661993:-	TOPBP1	ENST00000642236.1	ENST00000642236.1.1	28.4578	145.927	22	19.1985	75.7318	160.233	43.7716	46.454	0.212961	-0.860937
chr3:193593225-193614742:+	OPA1	ENST00000392438.7	ENST00000392438.7.1	13.0629	18.2996	27.5348	17.2764	14.2683	43.5896	21.388	34.829	0.348634	-0.359024
chr4:48341547-48341646:+	SLAIN2	ENST00000264313.10	ENST00000264313.10.1	42.9707	9.23791	7.01999	19.5671	13.2226	21.5381	16.556	19.3146	1.16279	0.354954
chr4:53377644-53377866:+	FIP1L1	ENST00000358575.9	ENST00000358575.9.1	110.124	16.3575	11.1038	11.7261	11.2419	26.2113	11.2063	26.0811	3.94857	1.56807
chr4:80266711-80266828:+	FGF5	ENST00000456523.3	ENST00000456523.3.1	1	1	1.87499	1.86629	2.26808	1.68635	1	2.73405	0.570718	-0.155412
chr4:82798715-82798766:-	SCD5	ENST00000319540.8	ENST00000319540.8.1	72.3501	10.0617	22.9332	23.2806	104.086	53.5034	40.8886	29.8199	0.22652	-0.846369
chr4:118352655-118352748:-	PRSS12	ENST00000296498.3	ENST00000296498.3.1	21.9853	19.7003	18.4999	7.4985	10.8276	29.1404	10.8521	17.8157	0.675596	0.272664
chr5:87267983-87268064:+	RASA1	ENST00000274376.10	ENST00000274376.10.1	55.5619	47.7508	35.0665	62.5069	51.2438	60.0261	57.7214	36.8967	0.411255	0.0639804
chr5:128537690-128539509:-	FBN2	ENST00000508053.5	ENST00000508053.5.1	18.9449	454.482	20.6142	25.3449	46.357	23.6977	28.5933	31.4702	8.02654	2.40008
chr5:172006479-172006845:-	FBXW11	ENST00000296933.10	ENST00000296933.10.1	8.26825	38.4006	15.9333	7.15011	7.70918	19.5084	6.92481	8.3625	0.602059	0.631536
chr6:47309695-47309842:-	TNFRSF21	ENST00000296861.2	ENST00000296861.2.1	63.956	2.15077	4.60937	4.93256	3.37555	10.1626	6.64595	6.27856	7.96315	2.36721
chr6:63572553-63572688:+	PTP4A1	ENST00000370651.5	ENST00000370651.5.2	6.86735	25.7137	25.5	25.373	6.22807	9.81558	5.67656	5.53012	1.44329	1.67837
chr6:116571560-116571644:+	RWDD1	ENST00000466444.6	ENST00000466444.6.1	5.03792	4.16184	4.80701	3.11161	3.3523	4.09937	4.63807	5.02668	0.313054	0.0612594
chr6:112086594-112087486:-	TUBE1	ENST00000368662.9	ENST00000368662.9.1	9.39413	4.61353	15.9545	5.26027	8.29147	15.6521	8.55162	10.9584	0.616844	-0.0841224
chr7:116672444-116672492:+	MET	ENST00000397752.7	ENST00000397752.7.1	84.9413	89.8264	44.3998	43.2403	111.017	105.325	62.8529	87.3207	0.131811	-0.504525
chr7:94394948-94394969:+	COL1A2	ENST00000297268.10	ENST00000297268.10.1	1	1	1.87499	1	1	1	1	1.28901	0.421309	0.217474
chr7:149195498-149198397:+	ZNF282	ENST00000610704.4	ENST00000610704.4.1	4.17756	15.4541	6.79012	7.69421	8.60204	11.4685	6.30553	6.45353	0.326185	0.0364262
chr8:38997000-38997039:+	ADAM9	ENST00000487273.6	ENST00000487273.6.1	51.3648	19.1234	111.249	10.7907	55.3082	56.5398	41.7487	27.1845	0.94221	0.113903
chr8:118110960-118111215:-	EXT1	ENST00000378204.6	ENST00000378204.6.1	9.07584	38.4006	4.19298	2.72778	5.7121	5.39897	5.34661	2.9778	2.6229	1.37875
chr9:36249204-36277042:-	GNE	ENST00000396594.7	ENST00000396594.7.1	5.94092	10.0233	6.34645	3.86539	5.72183	6.63534	5.82138	4.78938	0.253853	0.152559
chr9:128420877-128421078:+	CERCAM	ENST00000372842.5	ENST00000372842.5.1	2.52722	43.0757	8.24561	6.03191	4.10142	7.98098	6.55835	11.8883	2.01394	0.959422
chr9:137459131-137459278:-	NSMF	ENST00000265663.12	ENST00000265663.12.1	12.3062	61.776	4.14102	4.21483	1.61903	5.29128	1.91152	3.23447	4.21704	2.50751
chr10:12069008-12081475:+	DHTKD1	ENST00000263035.8	ENST00000263035.8.1	11.2758	12.2923	11.9375	12.7977	18.3311	18.3456	12.7111	14.5385	0.136559	-0.365613
chr10:33334597-33334663:-	NRP1	ENST00000265371.8	ENST00000265371.8.1	11.2758	145.927	41.409	32.2358	39.802	38.7498	26.3626	33.0168	1.30431	0.721652
chr10:73785586-73785946:+	ZSWIM8	ENST00000604729.5	ENST00000604729.5.1	84.9413	80.4763	10.782	10.6823	11.5373	13.061	16.9587	23.511	3.13794	1.86928
chr10:132537840-132537864:+	INPP5A	ENST00000368594.7	ENST00000368594.7.1	9.39413	10.3502	6.13331	8.79665	26.1219	27.0813	17.508	40.3051	0.0641845	-1.61001
chr11:68268065-68268251:-	C11orf24	ENST00000304271.10	ENST00000304271.10.1	2.61517	0.377703	1.23333	1.11017	1.14885	3.88034	2.10441	1.83179	0.825109	-0.165776
chr11:111540743-111543965:+	LAYN	ENST00000375614.6	ENST00000375614.6.1	5.19707	15.0252	7.12496	9.66294	1.97005	1	3.41982	4.66293	5.53025	2.44751
chr12:8949516-8949729:-	M6PR	ENST00000000412.7	ENST00000000412.7.1	12.3062	9.13045	14.44	14.9775	28.7851	41.7311	21.2321	18.0052	0.234855	-0.890133
chr12:22046268-22046448:+	CMAS	ENST00000229329.6	ENST00000229329.6.1	19.5744	17.4758	9.57746	5.31378	17.8789	19.8943	5.33151	6.06841	0.377281	0.215773
chr12:27332864-27368265:+	ARNTL2	ENST00000544915.5	ENST00000544915.5.1	17.7883	1	3.33332	2.26809	13.1278	9.67809	7.26888	5.25526	0.464871	-0.768265
chr12:88580274-88580388:-	KITLG	ENST00000347404.10	ENST00000347404.10.1	3.42275	15.0252	5.34482	5.06217	7.66193	7.97648	3.5271	8.62433	0.607537	0.148197
chr12:95217837-95217867:+	VEZT	ENST00000436874.5	ENST00000436874.5.1	21.1896	8.22706	13.46	27.719	16.6462	21.3409	13.8395	11.1299	0.768109	0.35657
chr13:49669818-49691459:-	EBPL	ENST00000242827.10	ENST00000242827.10.1	2.61517	1	1.98823	3.07552	2.5837	3.8689	2.8412	2.3247	0.393584	-0.280418
chr14:22982204-22982432:-	AJUBA	ENST00000262713.6	ENST00000262713.6.1	5.8455	47.7508	10.8965	9.62978	20.058	8.52101	11.3579	8.37381	2.10432	1.00084
chr14:23095193-23097732:+	C14orf119	ENST00000319074.5	ENST00000319074.5.1	0.585536	3.71015	4.5	2.3164	1.51826	2.74788	3.07642	3.61272	0.457303	-0.0589809
chr14:60092236-60092413:+	PCNX4	ENST00000406949.5	ENST00000406949.5.1	5.8455	2.18655	2.96875	5.46226	1.7358	4.66503	1.16868	1.15893	1.53963	1.47116
chr14:96502411-96502447:+	PAPOLA	ENST00000216277.12	ENST00000216277.12.1	68.1531	99.1766	76.2495	37.6701	86.4077	70.1354	53.0195	64.1358	0.375934	0.0800779
chr15:74675127-74695984:-	EDC3	ENST00000315127.8	ENST00000315127.8.1	31.6882	230.079	40.0833	31.385	18.6965	18.4474	21.0183	25.513	4.70951	2.11305
chr15:100602693-100603038:+	ASB7	ENST00000332783.11	ENST00000332783.11.1	2.23523	19.7003	2.88461	1.8478	5.26822	3.53781	2.20222	3.54153	2.1137	0.967981
chr15:101251542-101251914:-	CHSY1	ENST00000254190.3	ENST00000254190.3.1	2.85285	38.4006	2.37162	3.24358	15.7448	17.4884	5.28773	5.64305	0.789835	-0.234346
chr16:249600-254383:+	FAM234A	ENST00000301679.6	ENST00000301679.6.1	9.07584	15.0252	8.38888	8.22136	12.0422	33.9673	20.9273	30.3561	0.177232	-1.09874
chr16:77046-79465:+	MPG	ENST00000436333.5	ENST00000436333.5.1	30.3795	11.7093	9.68964	16.3179	22.1825	41.4947	10.6985	18.4417	0.386065	-0.216646
chr16:75464539-75464611:-	RP11-77K12.1	ENST00000567194.5	ENST00000567194.5.1	5.8455	33.7255	27.2498	10.5107	18.3254	11.9922	15.7931	9.66766	0.913415	0.571407
chr17:4999896-5000223:+	KIF1C	ENST00000320785.9	ENST00000320785.9.1	76.5472	43.0757	31.3332	13.0469	14.3867	23.2738	12.3699	14.8312	1.65219	1.40385
chr17:19003970-19004162:-	FAM83G	ENST00000388995.10	ENST00000388995.10.1	84.9413	15.8282	18.1111	15.1364	9.92446	13.4386	29.865	13.5653	3.29494	1.51839
chr17:43545275-43579331:-	ETV4	ENST00000586764.1	ENST00000586764.1.1	1	1	0.363638	0.535821	1	1	0.582075	0.408991	0.242864	-0.0236981
chr17:49675906-49678068:-	SPOP	ENST00000393328.6	ENST00000393328.6.1	122.715	10.9372	17.0877	17.058	18.3321	36.2909	25.0136	22.5074	2.65275	1.07663
chr18:74291847-74291961:-	CYB5A	ENST00000340533.8	ENST00000340533.8.1	4.23033	1.82379	8.95452	15.8537	14.3867	31.6626	8.97937	12.3217	0.500804	-0.601908
chr19:9435159-9435486:-	ZNF266	ENST00000588221.5	ENST00000588221.5.1	1.61762	2.35507	3.42308	5.47281	2.53752	3.63281	2.87712	3.77244	0.351048	-0.0268476
chr19:17101692-17102163:+	MYO9B	ENST00000595618.5	ENST00000595618.5.1	23.6123	17.4758	14.5625	13.5623	7.85301	10.874	8.29345	13.7898	0.734214	0.878396
chr19:50376775-50377598:+	NR1H2	ENST00000600355.5	ENST00000600355.5.1	1.44678	19.7003	10.6249	1.22806	4.24921	1.15487	1.81753	1.06566	6.66714	2.60864
chr19:50507676-50511158:-	JOSD2	ENST00000598418.5	ENST00000598418.5.1	0.691192	3.47137	1.19811	1.24809	2.25511	1.64221	1.26029	1.31027	0.65194	0.112215
chr20:4015263-4015353:-	RNF24	ENST00000336095.10	ENST00000336095.10.1	13.5912	15.0252	6.13331	12.2618	11.3953	12.668	15.0008	12.2713	0.320097	-0.0789908
chr20:33993688-33993982:+	RALY	ENST00000375114.7	ENST00000375114.7.1	105.927	27.3613	11.859	25.4454	68.2083	74.4745	34.0728	35.7345	0.488387	-0.424449
chr22:28772686-28772959:+	CCDC117	ENST00000249064.8	ENST00000249064.8.1	4.39688	7.53412	3.59259	5.18113	6.90879	13.0692	4.72681	5.69598	0.127611	-0.472653
chr22:29603841-29603943:+	NF2	ENST00000338641.8	ENST00000338641.8.1	5.91453	1.71193	4.45882	3.71479	3.48524	14.3617	6.05957	5.13392	0.564947	-0.288228
chr22:38303197-38361430:-	RP1-5O6.7	ENST00000400206.7	ENST00000400206.7.1	7.60648	7.23796	7.13018	7.08586	6.18214	7.64085	8.72149	8.98421	0.174733	-0.0801227
chr22:38700481-38700544:-	JOSD1	ENST00000216039.9	ENST00000216039.9.1	13.5912	10.3502	6.0909	8.42686	9.3551	13.6171	7.92649	12.2599	0.310857	-0.124742
chr22:39520746-39521528:+	ATF4	ENST00000404241.6	ENST00000404241.6.1	8.9442	22.6728	20.3018	18.7892	3.46825	3.27974	14.9641	16.9605	2.33287	1.57971
chrX:103254011-103255199:-	TCEAL8	ENST00000372685.7	ENST00000372685.7.1	51.3648	10.8855	7.50877	10.2852	18.2669	9.79861	11.3455	10.108	0.831899	0.485989
chrX:135973623-135973947:-	MMGT1	ENST00000305963.2	ENST00000305963.2.1	1.89355	6.76654	2.04054	1.76734	4.95306	7.19798	2.88092	3.78416	0.217977	-0.679405
chrX:149505195-149505243:-	IDS	ENST00000340855.10	ENST00000340855.10.1	2.61517	24.3754	14.1249	9.66294	9.66272	11.9816	11.0519	11.4043	0.643479	0.147439
chr1:1349127-1349286:-	DVL1	ENST00000378888.9	ENST00000378888.9.1	30.3795	1	19.3749	8.42686	21.4236	23.6496	21.8963	16.944	0.505707	-0.492836
chr1:50968787-50969330:+	CDKN2C	ENST00000262662.5	ENST00000262662.5.1	0.719067	1.96558	1.01781	1.3381	0.978334	1.21072	0.837783	0.992829	0.321698	0.298987
chr1:93079300-93079336:+	MTF2	ENST00000370298.8	ENST00000370298.8.1	126.912	131.902	31.5454	57.6298	71.1681	75.1258	78.5431	64.0029	0.586468	0.275328
chr1:161124502-161132625:-	DEDD	ENST00000368006.7	ENST00000368006.7.1	1.61762	3.47137	5.42105	2.20104	3.76226	5.76454	3.0173	3.86723	0.550651	-0.235332
chr1:185045496-185087593:+	RNF2	ENST00000367510.7	ENST00000367510.7.1	30.3795	24.3754	8.49122	13.674	7.89358	20.9784	8.02107	12.5384	1.18918	0.839907
chr1:227318016-227318043:-	CDC42BPA	ENST00000366769.7	ENST00000366769.7.1	126.912	113.202	75.1997	123.147	55.7724	38.0206	148.547	71.2774	0.904274	0.904364
chr2:178480486-178480711:+	PLEKHA3	ENST00000234453.9	ENST00000234453.9.1	1.44678	33.7255	3.65517	5.1213	3.32812	9.14007	2.26355	3.36936	1.17765	0.859835
chr2:226799328-226799523:-	IRS1	ENST00000305123.5	ENST00000305123.5.1	8.26825	71.1261	5.47999	12.2526	14.6319	8.87981	6.17274	13.3677	3.12942	1.37564
chr3:33439969-33440104:-	UBP1	ENST00000283629.7	ENST00000283629.7.1	47.1677	15.0252	20.2499	6.53638	6.04426	13.1493	16.7289	16.6834	3.00017	1.39899
chr3:44959432-44976117:-	ZDHHC3	ENST00000296127.7	ENST00000296127.7.1	5.19707	1.82379	4.81817	1.77604	1.65542	3.11484	2.18073	3.20965	1.10272	0.697708
chr3:143120062-143120200:+	CHST2	ENST00000309575.4	ENST00000309575.4.1	5.19707	1	1	1	1.86627	1.68635	1.359	1.28901	0.904603	0.289644
chr3:179347748-179347793:+	MFN1	ENST00000471841.5	ENST00000471841.5.1	14.7289	52.4258	51.3998	48.8104	17.609	80.6166	25.6611	29.1497	0.563724	0.368559
chr3:184314609-184314672:+	EIF4G1	ENST00000346169.6	ENST00000346169.6.1	82.834	231.661	130.679	157.865	128.589	117.61	109.627	147.333	0.478676	0.286124
chr5:16935893-16935944:-	MYO10	ENST00000513610.5	ENST00000513610.5.1	27.6503	145.927	25.5814	62.2716	41.9361	110.484	51.9942	59.3462	0.324883	-0.183833
chr5:141637040-141637283:+	RELL2	ENST00000297164.7	ENST00000297164.7.1	0.192416	0.176209	1.31818	0.518576	1	1.81401	0.852628	1	0.574468	-0.764793
chr5:159209353-159209449:-	RNF145	ENST00000424310.6	ENST00000424310.6.1	47.1677	6.76654	10.8965	13.7577	23.8255	97.7754	15.7823	14.669	0.68918	-0.121381
chr5:179801905-179806626:-	MGAT4B	ENST00000292591.11	ENST00000292591.11.1	2.28241	5.96861	2.92035	4.24984	2.45626	5.21941	3.37518	3.0425	0.208095	0.115975
chr7:91264690-91264888:+	FZD1	ENST00000287934.3	ENST00000287934.3.1	26.1824	4.29516	5.8611	2.87112	18.1744	8.87981	5.11769	4.69544	0.389659	-0.119881
chr8:56993688-56993727:-	IMPAD1	ENST00000262644.8	ENST00000262644.8.1	4.5742	1.45169	16.931	28.8507	12.0297	47.5724	27.1143	71.1451	0.2127	-1.47322
chr8:144490047-144490194:+	PPP1R16A	ENST00000292539.8	ENST00000292539.8.1	0.553225	5.67508	5.19998	4.24925	1.58203	1.86781	3.76551	5.64388	1.0253	0.465164
chr9:120788274-120793252:-	FBXW2	ENST00000608872.5	ENST00000608872.5.1	3.23388	3.71015	2.69697	3.9648	1.991	12.3056	2.52015	5.12814	0.479749	-0.0857966
chr10:12195809-12195911:-	NUDT5	ENST00000491614.5	ENST00000491614.5.1	29.2654	11.3889	28.72	81.7671	46.9836	50.3497	28.4736	67.8405	0.375407	-0.385045
chr10:84328665-84328710:+	CCSER2	ENST00000372088.7	ENST00000372088.7.1	26.1824	10.3502	7.53331	20.0585	33.0521	19.3152	30.4377	33.0799	0.195858	-0.87443
chr10:103450013-103452185:-	CALHM2	ENST00000369788.7	ENST00000369788.7.1	1.61762	10.3502	3.41379	1	1.43695	1.26821	1.76019	1.10541	2.98591	1.60064
chr11:6655615-6655663:-	DCHS1	ENST00000299441.4	ENST00000299441.4.1	17.7883	5.67508	25.4998	7.93035	22.6568	18.8451	19.3088	11.7621	0.364836	-0.376543
chr11:10808853-10808904:-	EIF4G2	ENST00000339995.9	ENST00000339995.9.1	22.3244	33.1859	21.6337	27.1658	25.8907	61.2317	28.5524	47.5233	0.132289	-0.549229
chr11:14499642-14499663:-	COPB1	ENST00000249923.7	ENST00000249923.7.1	471.071	664.861	595.996	609.138	539.821	690.782	493.184	499.828	0.151424	0.091626
chr11:128694217-128758133:+	FLI1	ENST00000527786.6	ENST00000527786.6.1	26.1824	38.4006	14.5333	20.0585	13.9968	16.0997	6.39461	9.24514	0.191322	1.12071
chr12:78864692-78977816:+	SYT1	ENST00000261205.8	ENST00000261205.8.1	1	5.67508	1	1	1	2.3727	1.359	1	0.649817	0.3583
chr12:121400162-121400216:+	RNF34	ENST00000392464.3	ENST00000392464.3.1	4.08808	5.35608	14.0232	8.75409	11.5913	35.5953	8.97937	22.5814	0.555098	-0.705722
chr13:51584551-51675194:+	WDFY2	ENST00000298125.6	ENST00000298125.6.1	3.42275	3.47137	1.97674	5.75535	3.64781	1.34913	2.48794	2.30475	0.836323	0.766181
chr14:55027274-55027349:+	SOCS4	ENST00000395472.2	ENST00000395472.2.1	21.9853	5.06522	11.862	12.7949	9.87657	37.3766	4.40937	6.49733	0.970188	0.811671
chr15:25438952-25438976:-	UBE3A	ENST00000614096.4	ENST00000614096.4.1	51.3648	15.0252	70.1245	32.5642	91.9586	79.2439	57.795	54.1125	0.367305	-0.642003
chr15:39920015-39920174:-	GPR176	ENST00000299092.3	ENST00000299092.3.1	1	1	1.87499	1	3.59882	3.03502	3.87197	3.69051	0.0859397	-1.55367
chr15:43792239-43792380:+	SERF2	ENST00000381359.5	ENST00000381359.5.1	114.321	16.652	5.23134	6.50935	12.2663	12.4237	6.74021	13.6903	3.67466	1.57433
chr15:72117827-72117902:-	MYO9A	ENST00000356056.9	ENST00000356056.9.1	93.3354	155.278	20.3103	46.4895	41.383	102.58	40.076	30.905	0.621535	0.531118
chr16:20862557-20900279:-	DCUN1D3	ENST00000324344.8	ENST00000324344.8.1	9.39413	15.0252	2.90909	7.96268	1.72213	2.44635	1.34147	1.48154	1.53975	2.25852
chr16:29862928-29863342:-	CDIPT	ENST00000219789.10	ENST00000219789.10.1	9.93551	6.28952	2.61274	4.42358	5.23505	7.92715	2.78677	4.71651	0.440548	0.191165
chr16:57245318-57246094:+	ARL2BP	ENST00000219204.7	ENST00000219204.7.1	6.65309	2.24459	4.92	7.01435	9.82962	22.5392	5.65377	9.23682	0.297796	-0.733345
chr17:63827461-63829497:+	PSMC5	ENST00000310144.10	ENST00000310144.10.1	24.8305	23.5444	15.9304	9.25652	20.7981	13.5817	15.3131	11.8639	0.348473	0.247306
chr19:17301134-17303246:-	ABHD8	ENST00000247706.3	ENST00000247706.3.1	1.70784	1.45169	1.91304	2.13741	1.89311	2.57988	2.14872	1.95719	0.19035	-0.214562
chr19:55600397-55602378:+	ZNF524	ENST00000301073.3	ENST00000301073.3.1	13.5912	1	1	2.85671	1.16249	1.68635	1.52921	1.39396	4.62363	1.90571
chrX:154379382-154379442:+	EMD	ENST00000369842.8	ENST00000369842.8.1	19.5744	127.227	32.1817	10.6445	15.0752	44.9759	13.4669	26.679	0.948727	0.789917
chr1:17005067-17011757:-	ATP13A2	ENST00000452699.5	ENST00000452699.5.1	3.47046	1.48698	4.61666	3.71508	3.24794	2.23464	3.10049	2.60777	0.328343	0.216477
chr1:45552482-45552542:+	AKR1A1	ENST00000372070.7	ENST00000372070.7.1	80.7443	127.227	32.1379	33.7368	156.063	135.525	105.344	81.4939	0.240076	-0.878844
chr1:51519203-51519245:-	EPS15	ENST00000371733.7	ENST00000371733.7.1	168.883	225.404	74.733	41.6803	51.4062	61.7466	30.9557	45.1409	1.05056	1.36082
chr1:53946094-53946448:+	LRRC42	ENST00000371370.7	ENST00000371370.7.1	68.1531	57.1009	33.7726	14.5808	56.2365	29.9537	20.723	24.9963	0.498349	0.414472
chr1:113979516-113980064:+	OLFML3	ENST00000369551.5	ENST00000369551.5.1	1	1	1	1	1	1.68635	1	1	0.176238	-0.154812
chr1:114757933-114757960:-	CSDE1	ENST00000339438.10	ENST00000339438.10.1	215.05	286.18	270.498	88.8154	327.313	364.861	275.823	439.778	0.286382	-0.608221
chr1:154272679-154272727:+	HAX1	ENST00000328703.11	ENST00000328703.11.1	9.93551	71.1261	5.52941	10.3271	3.88882	3.9799	4.47495	6.78652	6.98901	2.53503
chr1:154961593-154961638:-	PYGO2	ENST00000368457.2	ENST00000368457.2.1	9.88342	38.4006	14.5333	23.5236	26.1219	21.5905	31.5147	15.8604	0.615198	0.0360712
chr1:161118156-161119198:+	NIT1	ENST00000368008.5	ENST00000368008.5.1	1.94378	2.55574	2.15748	2.25377	4.24983	4.5786	2.65554	4.38673	0.13584	-0.772391
chr1:156282708-156282801:-	SMG5	ENST00000361813.5	ENST00000361813.5.1	51.3648	47.7508	6.52112	10.7006	81.5633	55.908	17.1327	12.3699	0.197913	-0.551353
chr1:205631704-205631815:-	ELK4	ENST00000357992.8	ENST00000357992.8.1	26.1824	24.3754	16.7499	13.1281	19.1917	8.52101	14.7365	20.9547	0.831372	0.582076
chr1:248825092-248825269:-	SH3BP5L	ENST00000366472.5	ENST00000366472.5.1	0.447381	0.28807	0.923913	1.7358	1.32497	1.93872	1.4766	3.60044	0.176614	-1.3273
chr2:38778194-38778278:+	GEMIN6	ENST00000409011.5	ENST00000409011.5.1	0.691192	19.7003	1.97674	4.68621	1.14885	4.06652	2.34709	2.49114	1.68776	1.03025
chr2:224585287-224585335:-	CUL3	ENST00000264414.8	ENST00000264414.8.1	12.4259	188.003	25.141	25.5215	39.9971	119.89	39.402	56.7564	0.491121	-0.431222
chr3:37243176-37243461:+	GOLGA4	ENST00000361924.6	ENST00000361924.6.1	59.7589	164.628	99.8743	45.7003	33.0191	75.0746	72.3239	113.713	0.667937	0.532443
chr3:100401905-100401998:+	LNP1	ENST00000383693.7	ENST00000383693.7.1	1	5.67508	1.87499	1.46418	1	0.592997	2.07699	2.15603	3.77314	1.60312
chr3:168095442-168095559:-	GOLIM4	ENST00000470487.5	ENST00000470487.5.1	10.3823	23.1329	20.2051	15.2712	31.8476	46.6805	25.1057	32.2924	0.174264	-0.930116
chr3:177064989-177098468:-	TBL1XR1	ENST00000430069.5	ENST00000430069.5.1	84.9413	57.1009	26.1363	32.5642	55.5752	33.3982	32.9762	40.7826	0.416725	0.271774
chr4:128809814-128831762:+	JADE1	ENST00000452328.6	ENST00000452328.6.1	6.80808	38.4006	18.6207	29.5321	33.9183	14.3064	21.3957	15.2446	0.955822	0.509036
chr5:112976904-112985968:+	DCP2	ENST00000389063.2	ENST00000389063.2.1	72.3501	2.66346	2.94444	3.07054	1.92856	2.21342	2.04352	1.79262	15.6166	3.38792
chr5:138331092-138337968:-	CDC25C	ENST00000513970.5	ENST00000513970.5.1	9.93551	4.64411	5.95575	7.38572	10.9406	10.3923	8.5219	10.8438	0.163318	-0.548467
chr5:150520900-150520966:+	NDST1	ENST00000523767.5	ENST00000523767.5.1	55.5619	29.0505	22.9332	9.2426	7.20832	9.09955	12.6424	8.94058	2.58413	1.78118
chr5:176359831-176361895:-	KIAA1191	ENST00000298569.8	ENST00000298569.8.2	2.17973	2.86689	1.56	0.743214	0.728543	0.725704	0.700334	0.790725	1.10125	1.33769
chr5:180808913-180815524:-	MGAT1	ENST00000333055.8	ENST00000333055.8.1	4.23033	10.3502	3.43478	3.07552	3.13915	2.95048	3.42248	3.92886	1.08546	0.731608
chr6:10749201-10749623:+	TMEM14B	ENST00000467317.5	ENST00000467317.5.1	26.1824	24.3754	10.6249	13.9944	36.5172	38.7493	15.0008	23.2536	0.0496419	-0.590664
chr6:35347086-35347131:+	PPARD	ENST00000311565.4	ENST00000311565.4.2	1.89355	15.0252	4.86206	5.43833	3.71614	14.727	5.08766	6.35367	0.196998	-0.259552
chr6:73309964-73310120:-	KHDC1	ENST00000370384.7	ENST00000370384.7.1	1	5.67508	1.14	1	1.95106	1.44873	0.705704	1.45278	1.35608	0.751368
chr7:6331214-6348758:-	FAM220A	ENST00000313324.8	ENST00000313324.8.1	5.19707	10.3502	1.32558	2.85671	5.43829	1.95168	2.69699	6.36185	2.0324	0.847875
chr7:27740206-27740236:+	TAX1BP1	ENST00000396319.6	ENST00000396319.6.1	26.4662	54.5464	61.2325	70.0569	143.501	353.098	141.151	68.6972	0.347409	-1.15802
chr7:32879821-32879914:-	KBTBD2	ENST00000304056.8	ENST00000304056.8.1	12.3062	61.776	20.7931	15.2988	24.2086	7.89536	15.6492	29.6048	3.06645	1.3474
chr8:85220333-85220354:-	C8orf59	ENST00000619594.4	ENST00000619594.4.1	21.9853	80.4763	57.8746	55.5765	119.679	38.3833	42.8284	44.4057	0.682031	0.287835
chr8:144517670-144517784:-	RECQL4	ENST00000621189.4	ENST00000621189.4.1	4.23033	2.35507	9.59089	5.85028	8.92551	8.32606	3.47392	5.79948	0.977538	0.178364
chr8:144104624-144104747:+	MAF1	ENST00000322428.9	ENST00000322428.9.1	8.26825	43.0757	5.03846	5.69722	5.55314	9.04615	4.96619	7.5706	1.61367	1.00321
chr9:38068658-38068700:-	SHB	ENST00000377707.3	ENST00000377707.3.2	21.9853	47.7508	40.3747	30.454	7.01776	15.6521	17.717	34.5249	0.903177	1.22412
chr9:136808119-136808155:+	RABL6	ENST00000311502.11	ENST00000311502.11.1	122.715	113.202	68.3745	48.6462	130.941	83.2147	72.2119	172.96	0.386319	-0.182109
chr10:71964629-72005757:+	CHST3	ENST00000373115.4	ENST00000373115.4.1	17.7883	10.3502	3.54545	11.3955	7.01776	9.92255	6.87671	4.85229	0.854352	0.687486
chr10:96586864-96586930:-	TM9SF3	ENST00000371142.8	ENST00000371142.8.1	143.7	46.3085	92.9543	305.935	170.423	145.717	252.483	237.259	0.394992	-0.505014
chr10:102643934-102644075:+	TRIM8	ENST00000643721.1	ENST00000643721.1.1	42.9707	38.4006	9.27271	25.2562	35.6509	19.5315	29.0017	16.3248	0.605824	0.332921
chr11:10854992-10855049:-	ZBED5	ENST00000432999.6	ENST00000432999.6.1	51.3648	61.776	16.4482	52.1113	36.5172	60.0261	30.5862	21.8787	0.676396	0.420979
chr11:11621863-11621950:-	GALNT18	ENST00000227756.4	ENST00000227756.4.1	5.19707	10.3502	9.74994	10.5292	4.71338	10.6089	7.6868	12.8493	0.164979	0.0586865
chr11:57567941-57568193:-	UBE2L6	ENST00000340573.8	ENST00000340573.8.1	1	1	1	3.59888	3.59882	2.3727	1	2.12105	0.559119	-0.236131
chr11:61357752-61357815:-	CYB561A3	ENST00000294072.8	ENST00000294072.8.1	1.80758	2.64758	8.9333	12.2618	18.3254	3.46804	12.075	8.90873	0.451883	-0.42553
chr11:61362073-61364264:+	TMEM138	ENST00000278826.10	ENST00000278826.10.2	17.7883	3.25846	2.38028	2.18778	3.76226	15.2451	3.58637	4.85229	1.8624	0.598458
chr11:70405280-70405331:+	CTTN	ENST00000346329.7	ENST00000346329.7.1	240.233	21.5358	107.909	38.5778	49.9308	33.0244	34.4599	43.8611	1.71117	1.24404
chr11:125569470-125569539:+	EI24	ENST00000278903.10	ENST00000278903.10.1	34.5765	38.4006	5.66666	12.1403	9.52626	28.7699	20.6518	23.1176	1.32297	0.527045
chr12:753275-753431:+	WNK1	ENST00000535572.5	ENST00000535572.5.1	143.7	113.202	52.2271	40.7175	55.3724	74.1173	70.297	75.6437	0.807662	0.433954
chr12:56257885-56258294:-	ANKRD52	ENST00000267116.7	ENST00000267116.7.1	26.8427	94.5015	25.2558	20.1309	23.5024	50.2946	25.7531	24.0579	0.401247	0.274572
chr13:29849925-29850012:-	UBL3	ENST00000380680.4	ENST00000380680.4.1	5.19707	1	2.5909	6.10597	7.96259	2.37465	2.10165	3.10165	0.597749	0.0959974
chr13:52028444-52028525:+	UTP14C	ENST00000521776.2	ENST00000521776.2.2	5.19707	5.67508	3.76744	7.03432	2.5851	4.18197	2.73726	2.22163	0.734959	0.983691
chr14:22872185-22872257:+	LRP10	ENST00000359591.8	ENST00000359591.8.1	21.9853	33.7255	11.7333	5.1213	33.4921	17.1991	9.87822	16.8175	0.623958	0.0390122
chr15:50648801-50686717:-	TRPM7	ENST00000313478.11	ENST00000313478.11.1	14.7289	7.32368	5.04687	3.9619	4.04813	4.43702	4.64266	3.78763	1.05672	0.89183
chr15:81001988-81002279:+	MESDC1	ENST00000267984.3	ENST00000267984.3.3	4.23033	5.67508	3.17241	1.92836	1.69887	5.1181	1.43524	3.60044	0.796596	0.66559
chr16:30925868-30930145:+	FBXL19	ENST00000471231.6	ENST00000471231.6.1	0.691192	10.3502	1.77778	1.8739	0.507601	2.0841	1.52109	1.53148	1.61014	1.12437
chr16:57186339-57204535:+	RSPRY1	ENST00000394420.8	ENST00000394420.8.2	5.46775	1.94924	6.35937	4.31709	3.04561	4.92774	3.98669	4.18449	0.54449	0.268343
chr16:70800929-70801004:-	VAC14	ENST00000261776.9	ENST00000261776.9.1	55.5619	61.776	23.5908	31.6358	39.0621	34.3743	39.1694	20.3163	0.449189	0.427336
chr16:84116750-84116810:-	MBTPS1	ENST00000343411.7	ENST00000343411.7.2	11.7226	9.58214	32.3792	36.6254	22.9231	44.1012	23.2355	42.8937	0.437463	-0.426601
chr16:85750944-85751064:-	C16orf74	ENST00000602719.5	ENST00000602719.5.1	1	1	2.74999	1.86629	1	1.68635	1.52833	1.89684	0.438599	0.129692
chr17:68248451-68248553:+	AMZ2	ENST00000359904.7	ENST00000359904.7.1	42.9707	47.7508	35.9997	33.9192	14.5807	36.8163	39.5678	12.6927	0.869504	0.968321
chr17:75471835-75485905:+	KIAA0195	ENST00000577380.5	ENST00000577380.5.1	0.553225	2.64758	0.801887	0.72045	0.781525	1	0.77049	0.880455	0.785144	0.382523
chr19:10500010-10503551:-	KEAP1	ENST00000171111.9	ENST00000171111.9.1	47.1677	6.91182	7.50877	5.53746	9.77425	9.51106	6.86137	7.8286	1.73153	0.878552
chr19:15418919-15419048:-	AKAP8L	ENST00000397410.9	ENST00000397410.9.1	38.1489	211.378	71.6362	62.863	51.5948	22.5905	44.4138	40.3539	3.50442	1.72978
chr19:48872454-48872523:+	PPP1R15A	ENST00000200453.5	ENST00000200453.5.2	244.43	24.9584	21.2654	29.7635	3.51594	12.2815	6.25396	15.5536	29.0488	4.26428
chr20:50903959-50928818:-	ADNP	ENST00000396029.8	ENST00000396029.8.1	5.69726	12.1536	25.7187	12.5124	18.8248	18.6085	16.5513	15.0452	0.456419	-0.259594
chr22:19431602-19431695:-	HIRA	ENST00000263208.5	ENST00000263208.5.1	59.7589	9.23791	12.6666	10.7492	13.9987	16.0266	19.2652	21.5932	1.59953	0.585108
chr22:49853922-49883437:+	ZBED4	ENST00000216268.5	ENST00000216268.5.1	6.80808	7.59033	10.9167	52.1113	9.66603	15.5839	8.20858	15.8182	1.10673	0.539951
chrX:48476241-48476274:+	FTSJ1	ENST00000348411.2	ENST00000348411.2.1	42.9707	38.4006	40.3747	10.8692	38.2497	21.7572	36.1336	29.3877	0.493961	0.129486
chrX:49171995-49173144:+	PLP2	ENST00000376327.5	ENST00000376327.5.1	1.88982	3.68513	3.60056	3.71774	4.24466	2.55398	4.71186	4.0591	0.360561	-0.164815
chr22:40552165-40552297:-	MKL1	ENST00000355630.7	ENST00000355630.7.1	9.04196	4.11148	13.5349	7.27558	6.51487	10.3458	11.1556	6.81689	0.375006	0.023565
chr1:1407245-1407275:-	MRPL20	ENST00000344843.11	ENST00000344843.11.1	17.1517	15.8282	62.1331	31.8111	98.4762	160.92	134.402	57.4475	0.190561	-1.63423
chr1:1839195-1839228:-	GNB1	ENST00000378609.8	ENST00000378609.8.1	24.2323	323.58	40.338	19.4292	60.5576	116.408	36.9721	45.332	0.966911	0.23251
chr1:17054033-17054087:-	SDHB	ENST00000375499.7	ENST00000375499.7.1	206.656	211.378	327.373	299.871	292.067	163.394	265.163	209.604	0.274415	0.222342
chr1:22451909-22490147:+	ZBTB40	ENST00000375647.4	ENST00000375647.4.1	16.3441	80.4763	39.8181	23.1173	20.3382	8.91205	19.6243	15.2856	3.31168	1.74147
chr1:25338328-25338385:+	TMEM50A	ENST00000374358.4	ENST00000374358.4.1	4.12743	6.91182	20.0689	11.3388	46.735	78.4066	20.5809	24.7716	0.363481	-1.31354
chr1:26306603-26306627:-	UBXN11	ENST00000374222.5	ENST00000374222.5.1	42.9707	80.4763	34.2498	32.1866	22.6568	15.4134	17.6422	21.5196	1.50107	1.39983
chr1:25823028-25823747:+	MTFR1L	ENST00000474295.5	ENST00000474295.5.1	2.71813	15.0252	3.1875	2.39906	1.64783	2.11852	2.35282	2.36028	2.50078	1.47418
chr1:27490097-27490145:-	WASF2	ENST00000618852.4	ENST00000618852.4.1	47.1677	52.4258	56.9996	62.5069	48.645	27.8622	67.0553	63.1367	0.412696	0.229989
chr1:29216766-29230906:-	MECR	ENST00000373791.7	ENST00000373791.7.1	1.44678	15.0252	4.30555	2.47161	2.62486	3.81615	5.6928	4.64849	1.44211	0.530188
chr1:31764197-31764248:-	ADGRB2	ENST00000398542.5	ENST00000398542.5.1	9.39413	5.67508	4.26665	1	13.1278	11.2953	7.10293	6.15682	0.206454	-1.01368
chr1:31919562-31938010:-	PTP4A2	ENST00000647444.1	ENST00000647444.1.1	13.5912	1	0.704226	0.80304	1.22033	3.00751	1.43946	1.30272	4.6161	1.65254
chr1:36156333-36156387:+	MAP7D1	ENST00000316156.8	ENST00000316156.8.1	97.5325	117.877	68.6664	38.4087	65.0558	40.8863	55.675	41.9246	0.750685	0.707466
chr1:36259387-36259483:+	THRAP3	ENST00000354618.9	ENST00000354618.9.1	538.224	89.9694	104.046	311.536	145.244	58.5236	133.031	129.533	1.08678	1.07556
chr1:36394088-36397776:-	LSM10	ENST00000315732.2	ENST00000315732.2.2	2.17973	1	1.45652	2.28024	1.57592	1.80462	2.78008	2.74643	0.344802	-0.281278
chr1:32817299-32817353:-	YARS	ENST00000373477.8	ENST00000373477.8.1	96.2949	70.1984	84.1126	117.712	139.89	187.408	126.108	165.876	0.136694	-0.713373
chr1:35931422-35945764:+	AGO3	ENST00000373191.8	ENST00000373191.8.1	55.5619	19.7003	19.1363	9.77429	12.0727	12.9113	7.20821	11.6741	1.42489	1.26606
chr1:37857671-37859588:-	MTF1	ENST00000373036.4	ENST00000373036.4.1	17.7883	43.0757	2.7193	5.26825	6.70637	18.8451	11.5665	5.20646	0.971499	0.628818
chr1:40979736-40979817:+	CTPS1	ENST00000372621.8	ENST00000372621.8.1	37.3413	197.353	107.866	239.231	126.791	159.324	172.442	190.457	0.410758	-0.228194
chr1:41242087-41242108:-	SCMH1	ENST00000372596.5	ENST00000372596.5.1	38.7736	24.3754	22.8748	24.3899	19.1917	16.0997	13.6798	20.6525	0.302004	0.675248
chr1:43365267-43368009:-	ELOVL1	ENST00000372458.7	ENST00000372458.7.1	4.43625	3.3731	3.06557	4.91975	3.7453	3.85669	4.18845	3.51579	0.260785	0.0670652
chr1:43531062-43538253:+	PTPRF	ENST00000359947.8	ENST00000359947.8.1	101.73	61.776	38.5454	21.4605	39.507	36.7101	41.6948	46.3824	0.80074	0.496957
chr1:54200201-54200228:+	MRPL37	ENST00000605337.5	ENST00000605337.5.1	164.686	19.9472	22.28	11.5312	263.48	75.9208	24.9108	26.1112	0.233645	-0.846983
chr1:62803761-62803809:+	ATG4C	ENST00000371120.7	ENST00000371120.7.1	13.5912	2.64758	14.9999	7.9844	18.3254	5.64613	6.84115	11.2165	0.680225	0.0409009
chr1:66925028-66928889:+	MIER1	ENST00000357692.6	ENST00000357692.6.1	30.3795	127.227	15.7241	61.6406	12.2526	22.0905	13.1608	18.3994	1.6668	1.67623
chr1:74733176-74733233:+	TYW3	ENST00000370867.7	ENST00000370867.7.1	7.46067	8.41412	9.3611	5.47875	6.15061	8.21297	4.85577	6.74211	0.419184	0.315547
chr1:86914149-86914248:-	2015-09-01	ENST00000331835.9	ENST00000331835.9.1	89.1384	85.1514	11.3906	12.4362	132.673	46.6296	24.5025	18.1522	0.534949	-0.132905
chr1:100888796-100894756:-	EXTL2	ENST00000370114.7	ENST00000370114.7.1	4.23033	15.0252	11.5	5.65627	7.79035	6.4982	2.76578	10.0821	1.49184	0.921095
chr1:100038116-100038155:+	MFSD14A	ENST00000370152.7	ENST00000370152.7.1	47.1677	71.1261	12.8276	36.518	93.6911	97.089	21.0295	52.5682	0.0880614	-0.654784
chr1:108885276-108885297:+	GPSM2	ENST00000406462.6	ENST00000406462.6.1	30.3795	38.4006	48.2497	46.0473	43.4473	52.4763	56.6444	52.5682	0.0755603	-0.340647
chr1:111139633-111139705:-	DRAM2	ENST00000286692.8	ENST00000286692.8.1	21.9853	33.7255	14.5333	24.3899	38.2497	62.7715	23.1897	22.7483	0.215642	-0.508949
chr1:113905210-113905438:+	DCLRE1B	ENST00000369563.3	ENST00000369563.3.1	9.07584	57.1009	30.8666	30.7074	22.8161	23.7922	27.6804	35.0799	0.74096	0.259492
chr1:114750173-114750206:-	CSDE1	ENST00000339438.10	ENST00000339438.10.2	215.05	19.0466	21.8586	21.2975	63.2178	94.7931	70.035	77.0405	1.35964	0.0673711
chr1:86387031-86387076:-	ODF2L	ENST00000359242.7	ENST00000359242.7.1	34.5765	43.0757	8.72412	36.518	11.2118	19.7222	15.8363	15.2854	0.928616	1.03704
chr1:117929487-117929520:-	GDAP2	ENST00000369443.9	ENST00000369443.9.1	17.7883	33.7255	9.13952	9.92451	15.2019	20.0918	11.927	12.2926	0.366246	0.144812
chr1:148640061-148679580:-	NBPF14	ENST00000606877.2	ENST00000606877.2.1	1	1	1	1	1	1	0.582075	1	0.3109	0.238173
chr1:150235976-150236063:-	ANP32E	ENST00000583931.5	ENST00000583931.5.1	19.5744	17.7126	43.5833	34.7244	61.1776	120.758	44.5842	59.018	0.313388	-0.976703
chr1:150236092-150236122:-	ANP32E	ENST00000583931.5	ENST00000583931.5.2	101.73	183.328	36.4883	68.1586	117.971	286.522	44.5842	82.7007	0.0861609	-0.34706
chr1:116666735-116666852:-	IGSF3	ENST00000369486.7	ENST00000369486.7.1	1.70784	15.0252	12.8276	5.47281	11.832	6.76641	9.18367	11.4495	0.812017	0.0839548
chr1:151327332-151327362:-	PI4KB	ENST00000368874.8	ENST00000368874.8.1	15.7436	127.227	40.1363	58.5582	55.7724	39.4729	43.5198	54.4046	1.10723	0.46049
chr1:151198654-151198732:+	PIP5K1A	ENST00000349792.9	ENST00000349792.9.1	80.7443	14.1807	13.6977	43.2403	36.7413	14.4103	14.8148	21.0763	0.587798	0.622442
chr1:154220521-154220560:-	C1orf43	ENST00000350592.7	ENST00000350592.7.1	17.9593	5.96861	6.25	4.9392	10.1759	21.8661	10.6351	11.0145	0.585974	-0.379911
chr1:120029962-120069461:-	NOTCH2	ENST00000256646.6	ENST00000256646.6.1	131.109	178.653	100.866	144.805	132.361	236.418	136.251	93.6259	0.326254	0.0119016
chr1:153977528-153977570:-	JTB	ENST00000271843.8	ENST00000271843.8.1	26.1824	5.67508	27.2498	11.4618	41.8472	73.0668	33.5692	27.4267	0.27247	-1.04917
chr1:156282953-156285188:+	TMEM79	ENST00000295694.9	ENST00000295694.9.1	3.42275	10.3502	1.96552	2.34897	1.46417	1	0.843573	1.94561	3.66276	2.02016
chr1:161045937-161045964:-	USF1	ENST00000368021.7	ENST00000368021.7.1	55.5619	52.4258	47.3747	49.5125	53.8426	40.122	20.4531	55.0445	0.555359	0.473618
chr1:160098414-160098546:-	IGSF8	ENST00000368086.5	ENST00000368086.5.1	38.7736	24.3754	21.9999	22.3522	17.4851	16.042	39.5678	36.2009	0.687107	0.295856
chr1:161226009-161226132:+	TOMM40L	ENST00000367988.7	ENST00000367988.7.1	13.5912	1	12.3749	5.1213	13.1278	5.07003	6.38494	4.81156	0.615653	0.0823793
chr1:161177443-161177485:-	B4GALT3	ENST00000367998.5	ENST00000367998.5.1	26.1824	29.0505	10.8636	10.2836	15.8535	29.1404	20.548	15.7451	0.435813	-0.0625589
chr1:162561683-162566079:+	UAP1	ENST00000367926.8	ENST00000367926.8.1	72.3501	10.9372	18.1111	9.33911	12.8615	10.3393	15.1857	21.8411	2.06954	1.0537
chr1:167936712-167936784:+	DCAF6	ENST00000367843.7	ENST00000367843.7.1	6.65309	29.0505	12.2	17.2463	30.707	32.7463	17.2109	18.8485	0.280012	-0.552343
chr1:178725299-178725341:+	RALGPS2	ENST00000367635.7	ENST00000367635.7.1	21.9853	33.7255	29.8748	16.7821	33.4921	66.8896	51.2594	41.1335	0.0923039	-0.8947
chr1:179882315-179882393:+	TOR1AIP1	ENST00000606911.6	ENST00000606911.6.1	168.883	206.703	72.8664	34.7579	82.2302	108.042	54.1755	52.3736	0.547891	0.579088
chr1:179954824-179954854:+	CEP350	ENST00000367607.7	ENST00000367607.7.1	122.715	197.353	71.4664	47.2854	89.3598	52.2007	45.2482	90.8815	1.20319	0.858708
chr1:184477501-184507629:+	C1orf21	ENST00000235307.6	ENST00000235307.6.1	2.61517	1	2.8421	5.85028	2.20161	2.62571	3.5271	4.70842	0.345865	-0.145208
chr1:203128314-203129005:+	ADORA1	ENST00000309502.7	ENST00000309502.7.1	1.44678	1	1	1	1	1	1.359	1.36629	0.291306	-0.0311645
chr1:203626852-203626888:+	ATP2B4	ENST00000357681.9	ENST00000357681.9.1	30.3795	52.4258	38.6247	40.8495	46.0462	62.0852	44.4385	53.3104	0.0816265	-0.349415
chr1:203796508-203796694:+	ZC3H11A	ENST00000639812.1	ENST00000639812.1.1	4.12743	61.776	38.3332	11.3434	17.168	6.67578	11.3213	14.4248	3.57349	1.77257
chr1:205664689-205664788:-	SLC45A3	ENST00000367145.3	ENST00000367145.3.1	5.19707	15.0252	5.66665	1.63405	4.71338	6.4908	4.55236	8.2252	0.75102	0.281225
chr1:206897739-206897790:+	IL24	ENST00000367093.3	ENST00000367093.3.1	1	1	1	1	1	1	1	1	0	0
chr1:206897469-206897520:+	IL24	ENST00000367093.3	ENST00000367093.3.2	1	1	1	1	1	1	1	1	0	0
chr1:205811032-205812896:-	SLC41A1	ENST00000367137.3	ENST00000367137.3.1	59.7589	4.29516	9.39997	14.9254	20.4952	10.5459	13.272	6.87824	1.03246	0.632553
chr1:207752090-207752192:+	CD46	ENST00000367047.5	ENST00000367047.5.1	47.1677	61.776	12.9219	14.9775	17.2139	25.4067	13.0691	14.3401	0.792395	0.848954
chr1:235328606-235328657:+	GGPS1	ENST00000282841.9	ENST00000282841.9.2	68.1531	10.8855	30.5908	17.685	16.6462	13.8543	10.0554	15.2856	1.35702	1.18255
chr1:244653168-244653210:+	DESI2	ENST00000302550.15	ENST00000302550.15.1	3.42275	33.7255	37.7497	34.7855	42.5811	49.7309	29.2099	44.0622	0.430955	-0.493924
chr1:247330020-247331607:-	ZNF496	ENST00000294753.8	ENST00000294753.8.1	1	10.3502	4.49999	1.96285	4.48722	2.57057	3.61794	3.86804	1.50537	0.585086
chr2:8837526-8837592:-	KIDINS220	ENST00000256707.7	ENST00000256707.7.1	23.6123	225.404	56.0453	88.7298	76.6601	38.1464	31.1329	48.8006	2.08406	1.29797
chr2:10448350-10448377:-	ODC1	ENST00000234111.8	ENST00000234111.8.1	126.912	75.8012	133.999	56.2373	219.161	214.27	336.661	330.469	0.145416	-1.41403
chr2:20447110-20447149:+	RHOB	ENST00000272233.5	ENST00000272233.5.1	110.124	141.252	78.933	42.3244	72.0343	79.9303	101.519	92.9045	0.534816	0.179209
chr2:25878394-25878448:-	ASXL2	ENST00000435504.8	ENST00000435504.8.1	143.7	178.653	53.2665	124.88	26.9937	58.6534	29.2099	46.5145	1.29339	1.6868
chr2:24793409-24799726:+	CENPO	ENST00000473706.5	ENST00000473706.5.1	17.1517	4.73378	8.69999	3.45375	3.42058	3.97022	3.53599	3.25544	1.58789	1.28213
chr2:27211485-27212205:-	SLC5A6	ENST00000310574.7	ENST00000310574.7.1	55.5619	10.0617	10.7674	3.73674	8.38598	6.53366	5.35478	4.80131	2.2868	1.45347
chr2:27212028-27212094:+	ATRAID	ENST00000380171.7	ENST00000380171.7.1	30.073	131.902	39.3055	18.1688	58.7705	141.823	48.7883	29.3316	0.161951	-0.480555
chr2:42494691-42494799:+	MTA3	ENST00000405592.5	ENST00000405592.5.1	47.1677	52.4258	69.2495	57.3091	41.7148	47.8054	62.0293	71.2289	0.134784	0.0525364
chr2:32277912-32277981:+	YIPF4	ENST00000238831.8	ENST00000238831.8.1	25.2275	127.227	150.624	46.976	99.4046	50.5851	48.1229	109.606	1.2611	0.661629
chr2:33599234-33599351:-	FAM98A	ENST00000238823.12	ENST00000238823.12.1	51.3648	94.5015	35.0454	30.8483	103.22	60.0155	31.3908	35.7033	0.391765	0.0188771
chr2:61145127-61162862:+	C2orf74	ENST00000426997.5	ENST00000426997.5.1	1	1.82379	2.5909	1.27955	1.19401	1.3665	1.67634	1.32102	0.282516	0.22846
chr2:64653757-64653796:-	SERTAD2	ENST00000313349.3	ENST00000313349.3.1	3.42275	29.0505	49.9996	40.8495	17.246	29.1404	21.7413	15.3978	0.988749	0.620136
chr2:71068683-71070744:+	NAGK	ENST00000418807.7	ENST00000418807.7.1	9.07584	1.69311	3.05882	3.0883	15.4426	5.0871	3.5621	3.22864	0.243616	-0.548046
chr2:74482860-74483013:-	CCDC142	ENST00000393965.7	ENST00000393965.7.1	4.12743	24.3754	4.69444	7.97451	2.44426	4.47124	4.97029	4.27692	1.74592	1.31459
chr2:74421750-74422302:+	WDR54	ENST00000348227.4	ENST00000348227.4.1	21.9853	13.3569	15	6.028	6.02798	7.54623	7.77262	7.67851	1.02991	1.02363
chr2:96637155-96637176:-	KANSL3	ENST00000431828.5	ENST00000431828.5.1	114.321	99.1766	15	24.5898	50.6665	13.3718	18.0548	22.5074	2.66293	1.53562
chr2:132416878-132417157:+	GPR39	ENST00000329321.3	ENST00000329321.3.1	1	1	1.48276	1.86629	1.46417	3.05905	1.71799	1.89684	0.24793	-0.485574
chr2:134254265-134254310:+	MGAT5	ENST00000409645.5	ENST00000409645.5.1	47.1677	5.94275	17.5454	5.38715	25.0935	36.4093	14.2585	6.08581	0.619286	0.0561045
chr2:149587666-149587714:-	MMADHC	ENST00000303319.9	ENST00000303319.9.1	13.0629	26.5375	32.36	50.8609	36.7469	95.8804	66.1982	46.8187	0.317754	-0.857631
chr2:151828232-151828403:-	ARL5A	ENST00000295087.12	ENST00000295087.12.1	0.192416	0.176209	0.758621	0.860225	1	0.775633	0.211647	0.701621	1.37852	0.386817
chr2:169573741-169573798:-	FASTKD1	ENST00000453153.6	ENST00000453153.6.1	51.3648	38.4006	13.7272	14.315	16.3177	29.0832	18.9631	17.8157	0.979151	0.583895
chr2:200811646-200811694:+	BZW1	ENST00000409600.5	ENST00000409600.5.1	122.715	94.5015	99.8743	128.345	150.865	204.16	97.9477	81.035	0.406491	-0.044024
chr2:201420644-201451365:-	TRAK2	ENST00000332624.7	ENST00000332624.7.1	5.03792	1.64372	3.21052	6.29566	9.87657	11.4137	4.65222	4.91005	0.411312	-0.606909
chr2:206765614-206765653:+	FASTKD2	ENST00000236980.10	ENST00000236980.10.1	97.5325	164.628	63.0664	137.874	94.5574	62.8645	56.3751	48.3676	0.834399	0.929693
chr2:202911915-202912002:-	WDR12	ENST00000261015.4	ENST00000261015.4.1	93.3354	131.902	84.9994	103.223	83.2959	57.9805	29.0005	59.4237	0.667809	1.0114
chr2:208271514-208271619:+	PIKFYVE	ENST00000264380.8	ENST00000264380.8.1	17.9593	9.13045	20.8333	17.4112	8.12666	9.86331	12.6908	19.2259	0.543601	0.506611
chr2:218568851-218568896:+	RQCD1	ENST00000273064.10	ENST00000273064.10.1	126.912	17.4758	43.9544	76.3676	59.9499	132.093	111.212	87.7691	0.762272	-0.186642
chr2:219245985-219246679:+	STK16	ENST00000409638.7	ENST00000409638.7.2	17.7883	19.7003	7.99997	2.2999	3.92475	3.60343	2.01359	2.39794	1.68805	1.90029
chr2:227328735-227328756:+	MFF	ENST00000304593.13	ENST00000304593.13.1	6.65309	43.0757	16.5909	23.7448	59.9065	81.303	44.2553	34.5693	0.212505	-1.23223
chr3:9649540-9649564:+	MTMR14	ENST00000353332.9	ENST00000353332.9.1	8.26825	19.7003	4.0625	5.61258	6.76378	20.0918	8.98077	9.77568	0.309309	-0.308717
chr3:10249041-10249366:+	TATDN2	ENST00000287652.8	ENST00000287652.8.1	34.5765	5.94275	6.73999	2.72778	6.39588	5.42538	3.4096	3.44398	1.83548	1.21261
chr3:5187782-5187944:+	EDEM1	ENST00000256497.8	ENST00000256497.8.1	5.8455	29.0505	5.26087	10.0854	6.39588	4.88897	3.43115	5.16939	1.97296	1.3702
chr3:38630413-38633315:-	SCN5A	ENST00000413689.5	ENST00000413689.5.1	5.19707	5.67508	2.44827	2.20356	8.79645	3.60343	2.7982	1.69156	0.379387	0.118808
chr3:42568978-42601044:-	SEC22C	ENST00000417572.5	ENST00000417572.5.1	13.5912	5.11895	5.47222	6.3894	2.67416	5.44116	3.88089	4.73779	1.67652	1.13453
chr3:33440133-33440184:-	UBP1	ENST00000283629.7	ENST00000283629.7.2	3.47046	15.0252	20.2499	23.5236	9.87657	31.1994	14.2635	22.7944	0.429738	-0.284256
chr3:43081451-43081517:-	POMGNT2	ENST00000344697.2	ENST00000344697.2.1	21.9853	19.7003	11.2666	7.96268	36.5172	10.7681	12.062	9.39232	0.464376	0.074987
chr3:44338723-44354798:+	TCAIM	ENST00000342649.8	ENST00000342649.8.1	34.5765	1.82379	4.25581	1.82275	7.02339	4.19263	2.56427	1.55453	1.71646	1.03391
chr3:45985003-45995804:-	FYCO1	ENST00000296137.6	ENST00000296137.6.1	12.3062	4.29516	22.9332	10.9117	21.4236	30.3042	12.9691	10.9691	0.600053	-0.201233
chr3:45388589-45388631:+	LARS2	ENST00000415258.5	ENST00000415258.5.1	21.9853	71.1261	18.2666	13.7577	21.8878	49.0445	19.3256	31.4023	0.35878	-0.0596411
chr3:47443039-47443081:-	SCAP	ENST00000265565.9	ENST00000265565.9.1	72.3501	38.4006	19.3448	49.5125	19.431	43.3283	30.7988	42.1758	1.2394	0.680723
chr3:49411921-49412089:-	RHOA	ENST00000418115.5	ENST00000418115.5.1	50.2626	309.555	28.6195	126.541	42.302	63.8563	58.2915	84.2051	1.68022	1.00533
chr3:49426408-49429306:-	RP11-949J7.8	ENST00000636166.1	ENST00000636166.1.1	5.19707	1	7.12496	3.59888	1.95106	3.0193	1.58949	2.4799	1.53899	1.15845
chr3:50328141-50328165:-	TUSC2	ENST00000232496.4	ENST00000232496.4.1	13.5912	15.0252	3.79999	8.42686	13.1278	18.1588	11.2392	14.0054	0.25947	-0.513272
chr3:50292303-50292483:-	IFRD2	ENST00000436390.5	ENST00000436390.5.1	9.07584	2.64758	12.8276	9.90634	4.49437	7.7803	2.98016	5.98279	1.42809	1.05655
chr3:51590394-51627693:+	RAD54L2	ENST00000409535.6	ENST00000409535.6.1	5.94092	19.7003	4.45882	4.04418	8.64662	5.49547	5.03606	8.42909	1.26422	0.494946
chr3:52409874-52410099:-	BAP1	ENST00000460680.5	ENST00000460680.5.1	38.7736	52.4258	8.97999	11.3506	21.4604	25.2986	9.21646	10.0792	0.457598	0.580028
chr3:52969226-53046065:-	SFMBT1	ENST00000394752.7	ENST00000394752.7.1	4.23033	38.4006	5.27777	9.2426	5.5735	9.30158	9.64223	9.20236	1.46309	0.686868
chr3:87227522-87245727:+	CHMP2B	ENST00000471660.5	ENST00000471660.5.1	2.65162	2.28744	2.8806	1.02691	2.54071	2.57834	2.29844	2.27971	0.294702	-0.138217
chr3:97764778-97764880:+	ARL6	ENST00000463745.5	ENST00000463745.5.1	9.39413	33.7255	3.86363	2.78736	14.9252	11.4137	4.5767	3.69707	0.96099	0.373613
chr3:112562062-112562236:+	SLC35A5	ENST00000492406.5	ENST00000492406.5.1	1.89355	8.41412	6.06896	2.52933	2.63856	5.39897	2.24101	4.57528	0.854205	0.469124
chr3:119236963-119237056:-	B4GALT4	ENST00000393765.6	ENST00000393765.6.1	26.1824	5.11895	32.4998	14.9254	8.94344	17.6871	9.84232	10.9365	1.21264	0.978881
chr3:107526337-107645906:+	BBX	ENST00000415149.6	ENST00000415149.6.1	131.109	11.579	14.9176	17.6751	13.1254	25.4067	16.9004	40.227	4.07263	1.55665
chr3:124887128-124887167:-	ITGB5	ENST00000296181.8	ENST00000296181.8.1	26.1824	29.0505	24.6248	28.7214	58.174	52.4763	39.8319	37.263	0.116313	-0.741386
chr3:130850770-130850905:+	ATP2C1	ENST00000504381.5	ENST00000504381.5.1	51.3648	29.0505	57.8746	50.3788	91.9586	137.584	63.3424	70.2808	0.257374	-0.736838
chr3:136752324-136752363:-	STAG1	ENST00000236698.9	ENST00000236698.9.1	47.1677	23.2424	4.95652	13.7195	25.0935	22.0739	22.7403	19.4248	0.606085	-0.052573
chr3:136819291-136819342:+	SLC35G2	ENST00000446465.2	ENST00000446465.2.1	13.5912	15.0252	18.4999	23.5236	6.1059	16.0997	10.3339	15.5736	0.468937	0.691504
chr3:141368672-141368720:+	ZBTB38	ENST00000509842.5	ENST00000509842.5.1	1	1	3.62498	5.33147	1	6.4908	1.83585	4.13893	0.65287	0.142983
chr3:149812901-149813291:+	RNF13	ENST00000392894.7	ENST00000392894.7.1	4.23033	47.7508	21.9998	3.92476	7.49918	15.4635	13.9687	12.9384	1.09316	0.467372
chr3:152268948-152268990:+	MBNL1	ENST00000355460.6	ENST00000355460.6.2	101.73	127.227	47.6665	41.3835	70.3018	68.2623	16.5331	23.3042	0.537169	0.994531
chr3:160399526-160399616:+	SMC4	ENST00000357388.7	ENST00000357388.7.1	676.728	954.716	782.369	320.559	482.647	821.188	412.037	541.734	0.470175	0.337777
chr3:167720157-167720211:-	PDCD10	ENST00000392750.6	ENST00000392750.6.1	63.956	66.4511	15.4884	25.6394	28.5808	26.2887	10.4839	16.4936	0.446203	0.962979
chr3:180988213-180989646:-	DNAJC19	ENST00000382564.7	ENST00000382564.7.1	9.39413	1	2.27272	4.46518	2.39252	3.84902	1.8991	2.47451	1.34703	0.845485
chr3:182793507-182793579:+	ATP11B	ENST00000323116.9	ENST00000323116.9.1	7.46067	29.0505	11.3055	13.4167	28.2638	25.7794	13.8756	41.0798	0.356032	-0.659591
chr3:172750732-172750807:+	ECT2	ENST00000232458.9	ENST00000232458.9.1	48.6474	262.804	64.4826	63.2776	69.1594	52.1075	79.5493	66.5825	1.8303	0.908405
chr3:183884746-183884869:-	RP11-449K6.5	ENST00000639401.1	ENST00000639401.1.1	30.3795	38.4006	31.6248	12.7299	5.46223	25.7086	14.309	11.465	1.75832	1.37516
chr3:184014433-184017956:-	ABCC5	ENST00000334444.10	ENST00000334444.10.1	11.4986	14.1807	53.4996	21.9235	11.1098	15.3595	17.926	12.6634	0.820436	0.738547
chr3:184315496-184315800:+	EIF4G1	ENST00000346169.6	ENST00000346169.6.2	32.5601	38.9822	25.4825	23.6313	37.7846	47.3507	26.226	29.9364	0.0685487	-0.215066
chr4:4248010-4248202:-	TMEM128	ENST00000254742.6	ENST00000254742.6.1	5.19707	1	3.65517	0.860225	3.71614	2.70358	1.82354	2.83244	0.715563	0.0273424
chr4:1721083-1721245:-	TMEM129	ENST00000303277.6	ENST00000303277.6.1	17.7883	5.67508	5.13635	2.9257	5.65624	13.6171	4.19175	5.41409	1.09113	0.413428
chr4:3074700-3074766:+	HTT	ENST00000355072.10	ENST00000355072.10.1	20.382	99.1766	16.96	51.1313	70.7445	184.255	28.9369	42.0844	0.341519	-0.606344
chr4:44678570-44678603:+	GUF1	ENST00000281543.5	ENST00000281543.5.1	8.26825	19.7003	7.15999	19.5671	36.5172	24.1992	18.2114	15.4819	0.402112	-0.568352
chr4:48341491-48341551:+	SLAIN2	ENST00000264313.10	ENST00000264313.10.2	42.9707	52.4258	43.8747	36.518	59.0402	51.1036	34.3866	30.4788	0.210462	0.0798945
chr4:55489407-55489452:-	CLOCK	ENST00000513440.5	ENST00000513440.5.1	3.42275	24.3754	23.7498	13.0686	10.7476	13.6171	13.5378	16.6064	0.631966	0.217177
chr4:52659186-52659213:-	USP46	ENST00000441222.7	ENST00000441222.7.1	3.42275	1	5.66665	11.3955	26.1219	27.0813	11.3707	15.5736	0.280037	-1.5166
chr4:52745896-52751611:-	ERVMER34-1	ENST00000443173.5	ENST00000443173.5.1	5.19707	15.0252	4.81817	3.88854	7.65743	8.52101	3.23191	7.8557	0.532929	0.146597
chr4:54064449-54064503:-	CHIC2	ENST00000263921.7	ENST00000263921.7.1	13.5912	29.0505	6.72726	2.85704	27.8544	10.7681	8.32126	4.03029	0.886381	0.233613
chr4:70688500-70688536:+	UTP3	ENST00000254803.3	ENST00000254803.3.1	135.306	178.653	154.999	162.131	93.6911	106.012	65.4557	96.6616	0.345436	0.842917
chr4:75724609-75724714:+	USO1	ENST00000264904.8	ENST00000264904.8.1	143.7	131.902	66.8635	48.9017	153.464	72.4496	63.9154	67.8719	0.415075	0.177474
chr4:72569077-72569122:-	ADAMTS3	ENST00000286657.9	ENST00000286657.9.1	13.5912	15.0252	11.4999	8.42686	20.058	18.8451	12.4879	13.7163	0.117317	-0.410165
chr4:83455710-83455752:-	HELQ	ENST00000295488.7	ENST00000295488.7.1	21.9853	7.59033	7.53331	7.25851	8.79645	9.95407	11.4109	5.65111	0.730904	0.380315
chr4:99088702-99088735:-	ADH5	ENST00000296412.12	ENST00000296412.12.1	34.5765	4.16184	4.28125	6.02494	11.0885	20.0582	9.0484	13.0291	1.19001	0.0912892
chr4:102344756-102344852:-	SLC39A8	ENST00000424970.6	ENST00000424970.6.1	5.03792	2.35507	15.4666	8.46207	7.37695	33.5603	15.6918	14.475	0.329805	-0.783793
chr4:112231822-112231903:+	AP1AR	ENST00000274000.9	ENST00000274000.9.1	17.7883	29.0505	2.96	9.55963	4.61065	5.03153	5.66673	6.93362	2.07016	1.52768
chr4:112818124-112904458:+	ANK2	ENST00000506722.5	ENST00000506722.5.1	51.3648	5.94275	55.2496	27.9224	18.7531	49.0445	49.3418	52.344	0.995312	0.174195
chr4:99950301-99950346:-	H2AFZ	ENST00000296417.5	ENST00000296417.5.1	244.43	206.703	159.666	443.676	564.077	428.761	397.772	483.591	0.209189	-0.840187
chr4:129093185-129093236:-	SCLT1	ENST00000281142.9	ENST00000281142.9.1	13.5912	10.8855	13.6	17.2463	14.461	13.1493	9.99102	14.2706	0.211396	0.116839
chr4:138242281-138242341:-	SLC7A11	ENST00000280612.9	ENST00000280612.9.1	42.9707	57.1009	25.36	77.5895	29.7787	28.454	40.2416	27.2792	0.807798	0.791657
chr4:147617623-147617659:+	TMEM184C	ENST00000508208.5	ENST00000508208.5.1	1.80758	5.67508	5.45453	3.21916	7.25847	10.2566	4.98547	9.42473	0.32776	-0.837796
chr4:184649397-184649424:-	CASP3	ENST00000523916.5	ENST00000523916.5.1	42.9707	127.227	99.8743	37.5882	117.08	92.9828	64.5246	54.6185	0.483077	-0.0103711
chr4:169621000-169635939:+	CLCN3	ENST00000513761.5	ENST00000513761.5.1	42.9707	5.11895	15.1944	24.4597	20.2568	15.2149	8.90396	8.30554	0.943783	0.829688
chr5:14769084-14871478:-	ANKH	ENST00000284268.7	ENST00000284268.7.1	55.5619	2.80677	5.78947	3.94942	3.43123	2.74744	3.18215	2.73779	6.39971	2.3559
chr5:32174130-32174184:-	GOLPH3	ENST00000265070.6	ENST00000265070.6.1	17.1517	33.9516	12.1717	13.8016	30.41	40.3991	12.8394	18.5163	0.141065	-0.368758
chr5:36876983-36877073:+	NIPBL	ENST00000282516.12	ENST00000282516.12.1	31.3807	379.681	42.8772	88.1377	119.364	124.229	98.83	63.8266	1.10859	0.360068
chr5:36953627-36953660:+	NIPBL	ENST00000282516.12	ENST00000282516.12.2	31.3807	66.9033	56.8371	59.4953	61.8997	96.356	65.0825	35.7505	0.440637	-0.0974316
chr5:50441337-50441358:-	EMB	ENST00000303221.9	ENST00000303221.9.1	5.19707	24.3754	16.7499	15.727	48.645	25.8272	31.3787	43.4842	0.30458	-1.03942
chr5:60928935-60945048:-	ERCC8	ENST00000265038.9	ENST00000265038.9.1	4.23033	19.7003	4.62068	2.52933	2.7478	2.65838	2.36051	1.91649	2.52408	1.61205
chr5:55853330-55853456:+	IL31RA	ENST00000396834.5	ENST00000396834.5.1	1	1	1.87499	2.73259	1	3.05905	1	1.28901	0.713459	0.411916
chr5:55982728-55982791:-	IL6ST	ENST00000381298.6	ENST00000381298.6.1	42.9707	57.1009	76.2495	37.2059	77.232	66.1205	62.2857	56.8597	0.255986	-0.278187
chr5:115544580-115544652:-	FEM1C	ENST00000274457.4	ENST00000274457.4.1	122.715	99.1766	56.5331	137.008	33.4921	62.7715	32.1354	30.6697	1.23284	1.51984
chr5:126918194-127030454:-	MARCH3	ENST00000308660.5	ENST00000308660.5.1	1	10.3502	6.24996	1.95107	8.42676	4.66303	1.93856	2.57067	1.21671	0.660218
chr5:134618203-134620981:-	SAR1B	ENST00000507419.5	ENST00000507419.5.1	1.44678	4.11148	3.28261	8.82741	3.07304	2.82477	5.43168	6.79283	0.426202	-0.0625915
chr5:138338153-138341263:+	FAM53C	ENST00000239906.9	ENST00000239906.9.1	3.16165	2.77022	5.94565	4.87013	5.66008	3.56884	6.27001	7.29596	0.143902	-0.438995
chr5:140042446-140043082:-	NRG2	ENST00000361474.5	ENST00000361474.5.1	5.19707	1	2.27272	5.17761	4.24921	3.44202	4.62974	2.79702	0.618766	-0.0530416
chr5:140564479-140564560:+	SLC35A4	ENST00000323146.7	ENST00000323146.7.2	38.7736	5.96861	11.1818	10.7478	2.73254	3.05905	3.15398	2.34526	4.78221	2.60103
chr5:145937882-145937927:+	SH3RF2	ENST00000511217.1	ENST00000511217.1.1	5.19707	1	2.74999	2.73259	1	2.3727	2.07699	1.86702	1.83142	1.07145
chr5:149551339-149551360:-	CSNK1A1	ENST00000261798.9	ENST00000261798.9.1	72.3501	71.1261	15.4884	21.9419	70.7445	206.905	17.6508	30.4385	0.253074	-0.432061
chr5:154039112-154039301:+	MFAP3	ENST00000322602.9	ENST00000322602.9.1	38.7736	85.1514	35.3635	115.351	72.9006	46.0978	33.8949	29.3592	1.29515	0.878006
chr5:149960856-149960886:+	SLC26A2	ENST00000286298.4	ENST00000286298.4.1	42.9707	47.7508	15.6363	43.4484	81.5633	53.0964	43.5302	51.5764	0.22289	-0.606158
chr5:176599820-176599844:-	GPRIN1	ENST00000303991.4	ENST00000303991.4.1	9.39413	10.3502	16.7499	6.07237	26.9882	21.5905	25.7707	28.1667	0.160718	-1.24041
chr5:177454875-177455034:+	PRR7	ENST00000323249.7	ENST00000323249.7.1	5.19707	5.67508	2.86666	2.39254	6.57007	3.05905	2.03707	3.32194	0.466231	0.255098
chr5:168486490-168488623:+	RARS	ENST00000231572.7	ENST00000231572.7.1	15.8228	63.6081	26.2823	47.6849	52.0246	47.3522	29.9605	36.8169	0.417185	-0.0664796
chr5:176388757-176388841:+	HIGD2A	ENST00000274787.2	ENST00000274787.2.1	3.08391	33.7255	3.60256	4.15705	7.38571	3.07082	4.63736	4.69635	4.4588	1.70732
chr5:177303815-177303869:+	PRELID1	ENST00000303204.8	ENST00000303204.8.1	47.1677	19.7003	28.1248	8.89104	51.2438	39.4356	17.7659	16.8175	0.437059	-0.179609
chr5:178153835-178153880:-	NHP2	ENST00000274606.7	ENST00000274606.7.1	101.73	57.1009	36.7777	98.9417	144.801	60.4225	82.433	51.9555	0.551386	-0.000691542
chr5:180136411-180209064:-	RASGEF1C	ENST00000361132.8	ENST00000361132.8.1	0.171072	0.176209	0.533335	1.86629	0.68298	1	1.79249	1.13405	0.60961	-0.755161
chr5:180793078-180808685:-	MGAT1	ENST00000333055.8	ENST00000333055.8.2	21.9853	1.82379	10.8965	3.93528	12.0957	15.7528	9.23042	13.8963	0.690265	-0.235704
chr6:7313116-7313197:-	SSR1	ENST00000474597.5	ENST00000474597.5.1	131.109	20.4227	30.7193	30.0643	72.2017	45.8635	32.0639	26.4938	0.490392	0.12234
chr6:13814440-13814464:-	MCUR1	ENST00000379170.8	ENST00000379170.8.1	5.19707	19.7003	7.36362	26.1225	20.4952	40.122	12.1746	16.944	0.489492	-0.468372
chr6:18155037-18155058:-	TPMT	ENST00000309983.4	ENST00000309983.4.1	9.39413	10.3502	18.4999	19.1922	13.9968	26.395	18.1706	13.5385	0.383933	-0.193052
chr6:24403000-24405171:+	MRS2	ENST00000378386.7	ENST00000378386.7.1	15.5365	4.08503	3.54545	2.9904	2.30663	2.75842	2.04179	1.95262	2.23321	1.52161
chr6:21593910-21594057:+	SOX4	ENST00000244745.3	ENST00000244745.3.1	6.03996	7.54289	8.56757	7.63894	7.37957	4.98971	9.298	7.4502	0.265716	0.0965773
chr6:26383210-26383273:+	BTN2A2	ENST00000469230.5	ENST00000469230.5.1	17.7883	29.0505	10.8	10.5107	17.4592	7.36393	8.08663	11.9905	1.25293	0.843166
chr6:27388826-27389051:+	ZNF391	ENST00000244576.8	ENST00000244576.8.1	4.23033	5.94275	3.72222	7.02344	1.63404	2.23897	1.40877	1.20747	1.38077	1.77631
chr6:33321931-33322914:-	DAXX	ENST00000374542.9	ENST00000374542.9.1	1	1	0.533335	1	1	1	1	1	0.202072	-0.178969
chr6:49463394-49463418:+	CENPQ	ENST00000335783.3	ENST00000335783.3.1	21.9853	85.1514	77.9994	90.2283	60.7728	132.779	43.8373	70.0729	0.553358	0.0250255
chr6:63635856-63635970:+	PHF3	ENST00000262043.7	ENST00000262043.7.1	340.962	552.659	77.8054	69.082	86.9125	227.701	110.305	106.707	1.35685	0.94541
chr6:56843406-56843652:-	DST	ENST00000370788.6	ENST00000370788.6.1	19.3178	304.88	52.5453	67.5749	22.4232	83.4418	37.1958	40.3877	1.05395	0.926214
chr6:99562927-99568588:-	CCNC	ENST00000520429.5	ENST00000520429.5.1	2.85285	5.96861	2.91878	4.38534	2.85221	2.87222	3.28014	3.2851	0.464226	0.406815
chr6:95577575-95586428:+	MANEA	ENST00000358812.8	ENST00000358812.8.1	63.956	117.877	66.7997	26.9969	24.2812	18.5003	13.3324	31.0172	2.12108	1.89592
chr6:100881249-100881276:-	ASCC3	ENST00000369162.6	ENST00000369162.6.1	206.656	51.2512	42.2222	30.7351	188.115	134.932	51.7652	96.2361	0.320512	-0.614064
chr6:110958714-110958744:+	GTF3C6	ENST00000329970.7	ENST00000329970.7.1	30.3795	29.0505	27.2498	8.46207	18.6386	9.52595	7.76336	4.65092	0.797253	1.32323
chr6:133953303-133980088:+	TBPL1	ENST00000237264.8	ENST00000237264.8.1	3.42275	4.29516	8.46664	5.43833	6.8203	10.1626	11.5323	4.23739	0.336408	-0.443168
chr6:161232256-161273963:-	AGPAT4	ENST00000320285.8	ENST00000320285.8.1	34.5765	14.1807	17.7999	31.6358	23.2803	8.40411	10.8739	11.6382	0.488554	0.912227
chr7:5190278-5190353:+	WIPI2	ENST00000288828.8	ENST00000288828.8.1	22.8048	117.877	42.9999	19.036	74.3393	44.7516	26.0862	40.7268	0.94546	0.338161
chr7:518997-519093:-	PDGFA	ENST00000402802.7	ENST00000402802.7.1	13.5912	1.90338	3.86363	4.46518	3.91015	10.6089	4.98547	4.12999	1.25394	0.462426
chr7:838814-838970:+	SUN1	ENST00000389574.7	ENST00000389574.7.1	5.48843	4.46553	4.43046	2.68647	10.2235	10.4568	7.27381	8.8768	0.115829	-1.09263
chr7:6641944-6642489:+	ZNF316	ENST00000382252.5	ENST00000382252.5.1	42.9707	3.71015	26.6666	14.315	9.14842	7.4138	9.71537	11.3593	1.60182	1.20202
chr7:7640851-7641076:-	RPA3	ENST00000223129.8	ENST00000223129.8.1	30.3795	43.0757	50.8746	53.8439	114.482	86.1074	41.6185	98.6847	0.356304	-0.658787
chr7:2432574-2432604:+	CHST12	ENST00000258711.7	ENST00000258711.7.1	34.5765	24.3754	10.8636	5.81424	13.0468	18.9081	10.6425	11.0348	0.787116	0.456022
chr7:12687014-12688204:+	ARL4A	ENST00000396662.5	ENST00000396662.5.1	0.192416	1	1.93333	1.38802	5.33136	3.02489	2.20991	2.08357	0.320118	-1.06816
chr7:6578590-6578698:+	ZDHHC4	ENST00000396706.2	ENST00000396706.2.1	38.7736	1.45169	0.929293	1.4239	1.39593	4.84045	2.28989	1.58759	11.7983	2.87671
chr7:43650550-43729464:-	COA1	ENST00000310564.10	ENST00000310564.10.1	55.5619	6.76654	5.57692	5.48256	2.44441	3.00466	3.82237	5.57292	9.176	2.77742
chr7:35801209-35832814:+	2007-09-01	ENST00000399034.7	ENST00000399034.7.1	3.77927	80.4763	2.12385	2.78896	3.70331	7.05863	4.95942	3.96364	4.6309	1.76059
chr7:44122042-44122129:-	POLD2	ENST00000406581.6	ENST00000406581.6.1	14.85	5.98351	7.55319	9.68991	11.1621	9.28955	11.3953	9.71976	0.281101	-0.138332
chr7:41700505-41703076:-	INHBA	ENST00000242208.4	ENST00000242208.4.1	1	1	3.62498	1	1	1	1.71799	1.28901	0.521112	0.288595
chr7:66996843-66996897:+	TYW1	ENST00000359626.9	ENST00000359626.9.1	3.42275	2.64758	7.27585	4.68621	2.25797	11.9891	6.80499	11.0731	0.515292	-0.308874
chr7:56051336-56051357:-	PSPH	ENST00000275605.7	ENST00000275605.7.1	42.9707	24.3754	35.0665	22.9048	21.8878	25.0223	32.2849	29.723	0.455756	0.261273
chr7:77794287-77798348:-	TMEM60	ENST00000257663.3	ENST00000257663.3.1	1	0.76269	2.52564	2.55429	2.29996	2.68209	1.70535	1.6734	0.574758	-0.102149
chr7:87858731-87876195:-	SLC25A40	ENST00000341119.9	ENST00000341119.9.1	38.7736	0.861379	2.57746	3.75744	1.90502	1.80153	1.63467	3.34603	8.36369	2.5565
chr7:94004297-94004351:-	BET1	ENST00000222547.7	ENST00000222547.7.1	9.39413	24.3754	8.97221	5.06217	28.7207	7.38526	19.8066	16.4796	1.27347	0.133498
chr7:98251445-98252250:-	TECPR1	ENST00000447648.6	ENST00000447648.6.1	21.9853	2.64758	6.55171	6.3894	13.0468	11.9891	8.12737	8.3033	0.524407	-0.200259
chr7:100478907-100478958:-	TSC22D4	ENST00000300181.6	ENST00000300181.6.1	7.46067	19.7003	19.3749	6.70642	7.73989	5.62831	4.12853	5.09306	1.54214	1.38872
chr7:102436242-102436329:+	ORAI2	ENST00000478730.6	ENST00000478730.6.1	17.7883	15.0252	4.26665	2.58512	7.96259	5.07003	7.26888	3.39003	0.997907	0.710846
chr7:107743911-107744013:+	CBLL1	ENST00000440859.7	ENST00000440859.7.1	21.9972	15.8282	11.7187	11.8328	33.4921	19.3981	15.0002	11.5091	0.13367	-0.285374
chr7:112790312-112790372:-	TMEM168	ENST00000312814.10	ENST00000312814.10.1	17.7883	29.0505	42.1247	31.3203	13.0468	14.9271	16.9017	22.9776	0.469543	0.840965
chr7:101217411-101217579:-	PLOD3	ENST00000223127.7	ENST00000223127.7.1	84.9413	75.8012	11.8451	111.886	86.761	104.639	34.3144	40.8774	0.917652	0.258738
chr7:135148236-135164563:+	TMEM140	ENST00000275767.3	ENST00000275767.3.1	1	1	1	1	1	1	1	1	0	0
chr7:151028466-151033613:+	ABCB8	ENST00000358849.8	ENST00000358849.8.1	80.7443	33.7255	10.3333	11.6706	31.1712	11.7696	10.6202	9.13282	0.81429	0.94611
chr7:158693469-158701925:-	NCAPG2	ENST00000356309.7	ENST00000356309.7.1	198.262	10.967	17.169	12.023	12.0717	17.7312	14.5778	12.2616	6.71387	2.26307
chr8:15540252-15540462:+	TUSC3	ENST00000382020.8	ENST00000382020.8.1	16.3441	89.8264	17.4418	26.5155	12.9352	39.5629	12.1799	22.9055	0.438058	0.614386
chr8:17245235-17246782:-	CNOT7	ENST00000361272.8	ENST00000361272.8.1	17.7883	29.0505	22.8748	8.42686	7.34041	8.62848	5.64254	7.50074	1.09919	1.45518
chr8:23084421-23084514:+	RP11-875O11.4	ENST00000520607.1	ENST00000520607.1.1	1	1	0.363638	1	1	3.05905	1.71799	1	0.367624	-0.655988
chr8:26513832-26513859:-	PNMA2	ENST00000522362.6	ENST00000522362.6.1	72.3501	66.4511	119.999	151.735	47.8814	112.875	161.471	142.028	0.35319	-0.0323704
chr8:23449986-23457608:-	ENTPD4	ENST00000356206.10	ENST00000356206.10.1	4.23033	47.7508	21.9998	25.2562	15.2659	39.4356	25.8313	30.1472	0.333985	-0.332153
chr8:31033890-31058435:+	WRN	ENST00000298139.5	ENST00000298139.5.1	55.5619	13.3569	17.4138	12.5366	14.7205	20.0712	24.8525	37.8124	1.39679	0.452111
chr8:41598381-41598468:+	AGPAT6	ENST00000396987.7	ENST00000396987.7.1	9.88342	1.45169	9.90907	7.34047	15.2659	8.62848	9.9897	7.42049	0.337044	-0.51622
chr8:42049692-42051975:-	KAT6A	ENST00000406337.5	ENST00000406337.5.1	8.10258	155.278	53.4999	70.6268	44.7488	56.3525	42.5589	45.0892	0.91717	0.526067
chr8:54022261-54022399:-	TCEA1	ENST00000521604.6	ENST00000521604.6.1	9.39413	2.64758	5.66665	4.17023	21.7905	11.2953	9.14954	7.14649	0.151805	-1.09821
chr8:52686897-52714133:-	RB1CC1	ENST00000025008.9	ENST00000025008.9.1	9.07584	11.7093	15.9545	39.9832	36.7413	107.384	60.9649	32.903	0.441063	-1.12584
chr8:65634009-65634036:-	ARMC1	ENST00000276569.7	ENST00000276569.7.1	42.9707	38.4006	15.3181	24.2089	35.8129	46.9914	13.3313	24.9934	0.151681	0.0477814
chr8:66667619-66667649:+	SGK3	ENST00000519289.1	ENST00000519289.1.1	26.1824	10.3502	24.6248	17.4596	12.6043	16.3313	13.5378	25.5657	0.65155	0.382093
chr8:66429051-66429081:+	RRS1	ENST00000320270.3	ENST00000320270.3.1	80.7443	80.4763	145.374	50.1386	38.1338	52.4763	105.468	22.7494	0.357908	0.854653
chr8:76984107-76986284:-	PEX2	ENST00000357039.8	ENST00000357039.8.1	3.42275	15.0252	1.47015	2.85704	2.81707	3.12842	1.81441	1.69407	1.57477	1.08994
chr8:76988307-77000039:-	PEX2	ENST00000357039.8	ENST00000357039.8.2	3.42275	2.64758	8.95452	4.24974	4.85136	3.54795	4.3378	4.10476	0.549795	0.186301
chr8:80485783-80486319:+	ZBTB10	ENST00000430430.5	ENST00000430430.5.1	23.6123	32.3041	19.2982	24.3005	24.3489	36.0013	22.4304	41.0629	0.14294	-0.269165
chr8:89757906-89757927:+	RIPK2	ENST00000220751.4	ENST00000220751.4.1	13.5912	24.3754	15.4666	13.5328	26.1219	27.0813	20.7448	24.4096	0.153308	-0.556207
chr8:100150622-100151346:+	POLR2K	ENST00000353107.7	ENST00000353107.7.1	8.26825	1.82379	9.74999	11.3506	31.1712	25.6804	23.0734	17.7071	0.209148	-1.51472
chr8:102412666-102412690:-	UBR5	ENST00000520539.5	ENST00000520539.5.1	177.277	155.278	153.249	169.061	119.679	180.137	122.7	133.077	0.223457	0.28174
chr8:115623692-115668610:-	TRPS1	ENST00000395715.7	ENST00000395715.7.1	72.3501	75.8012	28.0454	50.6671	59.0402	17.6759	51.6184	37.0798	1.43849	0.892117
chr8:119832774-119832825:-	TAF2	ENST00000378164.6	ENST00000378164.6.1	97.5325	127.227	22.9655	32.0683	26.6786	79.9303	39.0394	47.8598	1.23613	0.70174
chr8:123274237-123274258:-	ZHX1-C8orf76	ENST00000622816.2	ENST00000622816.2.1	13.5912	15.0252	4.73332	17.4596	13.1278	16.0997	15.7188	16.0284	0.315979	-0.25198
chr8:133571793-133571892:-	ST3GAL1	ENST00000521180.5	ENST00000521180.5.1	5.19707	1	6.24996	2.73259	7.93018	4.43175	3.90579	4.17909	0.50284	-0.351512
chr8:132758897-132760502:-	TMEM71	ENST00000377901.8	ENST00000377901.8.1	1	1	1	1	1	1	1	1	0	0
chr8:132775425-132775452:+	PHF20L1	ENST00000395386.6	ENST00000395386.6.1	26.1824	43.0757	8.16278	14.4799	30.707	36.2909	18.7813	26.6498	0.293071	-0.406614
chr8:131904241-131904277:+	EFR3A	ENST00000254624.9	ENST00000254624.9.1	17.7883	15.0252	11.5	19.1922	38.598	57.9805	28.8533	24.0493	0.198064	-1.06145
chr8:142449442-142464202:+	ADGRB1	ENST00000517894.5	ENST00000517894.5.1	9.39413	10.3502	4.73332	7.06406	12.2615	2.3727	4.43411	7.06917	1.4842	0.847012
chr9:12775043-12775085:+	LURAP1L	ENST00000319264.3	ENST00000319264.3.1	5.19707	24.3754	6.24996	12.2618	3.32086	1.81401	3.90579	3.01789	4.88144	2.36915
chr9:5629184-5629265:+	RIC1	ENST00000414202.6	ENST00000414202.6.1	80.7443	99.1766	42.0665	84.1642	85.8947	89.5392	70.6452	38.4606	0.595422	0.272457
chr9:33473877-33473898:-	NOL6	ENST00000353159.6	ENST00000353159.6.1	122.715	80.4763	46.7332	26.3619	62.5053	23.563	42.2094	22.5642	0.93053	0.936235
chr9:70413867-70413942:-	KLF9	ENST00000377126.3	ENST00000377126.3.1	63.956	15.0044	6.65656	4.58041	19.5234	11.3259	11.5873	9.30594	1.12127	0.502668
chr9:94374736-94374823:+	MFSD14B	ENST00000375344.7	ENST00000375344.7.1	9.07584	66.4511	12.2325	13.0287	8.72592	22.3149	27.8446	38.1511	1.06091	0.262674
chr9:107283286-107283313:+	RAD23B	ENST00000358015.7	ENST00000358015.7.1	32.4958	230.079	120.933	54.4381	83.0663	366.825	172.807	135.036	0.135689	-0.915004
chr9:112380084-112404153:+	HSDL2	ENST00000398805.7	ENST00000398805.7.1	4.70569	7.53412	3.83684	4.38534	4.24073	4.97954	5.61202	6.61166	0.349434	-0.0110012
chr9:115118001-115118229:-	TNC	ENST00000350763.8	ENST00000350763.8.1	28.4578	36.6836	70.3859	40.6345	70.1617	55.982	55.1451	45.3988	0.321015	-0.307434
chr9:127916879-127916984:-	ST6GALNAC4	ENST00000335791.9	ENST00000335791.9.1	5.19707	1	0.681819	1	1.46417	1	2.58498	1.36629	1.27641	0.471229
chr9:128322626-128322656:+	COQ4	ENST00000300452.7	ENST00000300452.7.1	51.3648	66.4511	31.7999	11.0886	63.3716	41.4947	26.4317	19.2372	0.390234	0.0674593
chr9:130053918-130075645:+	GPR107	ENST00000347136.10	ENST00000347136.10.1	13.0629	5.79488	10.0442	26.6729	10.503	13.3733	10.2428	13.2325	0.569915	0.224465
chr9:137045992-137046016:-	NPDC1	ENST00000371601.4	ENST00000371601.4.1	72.3501	61.776	18.5	9.44932	17.1276	41.4947	24.1198	13.4837	1.43603	0.844135
chr9:137086973-137087060:+	MAN1B1	ENST00000371589.8	ENST00000371589.8.1	51.3648	75.8012	23.2069	19.8191	15.7448	21.6418	14.4924	43.49	1.2476	1.14109
chr10:3782143-3785114:-	KLF6	ENST00000497571.5	ENST00000497571.5.1	5.46775	5.04493	6.21698	5.66401	3.86883	3.18752	4.3352	6.71738	0.281989	0.398693
chr10:22321517-22321571:+	BMI1	ENST00000376663.7	ENST00000376663.7.2	68.1531	52.4258	28.9999	15.4427	46.9531	56.7595	43.2104	82.2112	0.455745	-0.306619
chr10:43644788-43646185:-	ZNF32	ENST00000374433.6	ENST00000374433.6.1	0.192416	5.67508	6.72726	3.78507	4.49218	3.19902	4.40937	5.30206	0.684224	0.0202003
chr10:43396536-43396575:-	HNRNPF	ENST00000356053.7	ENST00000356053.7.1	441.692	97.3835	325.332	94.0792	195.975	418.178	276.254	244.453	0.801543	0.0176378
chr10:34815111-34815162:-	PARD3	ENST00000374790.7	ENST00000374790.7.1	63.956	122.552	98.1243	89.362	121.412	136.897	128.085	139.146	0.137471	-0.499051
chr10:50344158-50344278:-	SGMS1	ENST00000361781.6	ENST00000361781.6.1	4.23033	38.4006	8.48274	7.40237	18.3254	3.38227	7.30473	5.01103	4.52531	1.83014
chr10:58385432-58386303:+	TFAM	ENST00000487519.5	ENST00000487519.5.1	1.98436	3.71329	3.30137	4.86073	2.68425	3.28523	2.68801	2.98632	0.316006	0.24044
chr10:63133415-63152162:+	NRBF2	ENST00000277746.10	ENST00000277746.10.1	5.19707	15.0252	2.36111	2.39254	2.90212	1.81401	2.62109	1.86041	3.02897	1.61595
chr10:72626041-72626068:-	MICU1	ENST00000361114.9	ENST00000361114.9.1	97.5325	89.8264	144.499	26.1595	141.336	171.215	74.8046	75.6637	0.623225	-0.19589
chr10:86521592-86521730:-	WAPL	ENST00000298767.9	ENST00000298767.9.1	21.5517	26.2947	8.76303	7.05436	27.1603	27.4355	11.6941	16.1628	0.18886	-0.445298
chr10:73810897-73811581:-	NDST2	ENST00000309979.10	ENST00000309979.10.1	6.65309	5.67508	13.2499	9.35522	7.96259	11.5821	5.90519	5.37421	0.69889	0.408729
chr10:91222690-91222720:+	PCGF5	ENST00000336126.5	ENST00000336126.5.1	17.7883	2.64758	7.6818	13.0686	14.3149	52.4763	18.803	26.3866	0.433678	-0.864521
chr10:102424780-102432576:-	CUEDC2	ENST00000369937.4	ENST00000369937.4.1	3.62494	3.3731	5.10059	7.00431	7.36443	7.12234	6.27631	8.35032	0.171791	-0.611923
chr10:102644315-102644492:+	TRIM8	ENST00000643721.1	ENST00000643721.1.2	8.26825	6.76654	7.03447	9.2426	7.98436	11.5821	8.2556	11.1479	0.160512	-0.277116
chr10:112446762-112446804:-	ZDHHC6	ENST00000626395.2	ENST00000626395.2.1	30.3795	24.3754	24.6248	7.33699	5.07421	8.62848	9.69495	11.6809	1.92291	1.58257
chr10:117375208-117375319:-	PDZD8	ENST00000334464.6	ENST00000334464.6.1	5.19707	10.3502	5.88371	29.5877	73.7669	16.3931	13.4043	17.3899	0.606549	-0.492994
chr10:123007146-123008786:-	IKZF5	ENST00000368886.9	ENST00000368886.9.1	68.1531	4.29516	23.3999	34.4209	11.676	11.5821	5.26497	6.17964	2.19064	2.01991
chr10:126330478-126388200:-	ADAM12	ENST00000368679.8	ENST00000368679.8.1	1	1	4.49997	3.32089	7.06391	9.92255	8.39656	3.81497	0.31447	-1.27861
chr11:534308-535504:-	HRAS	ENST00000311189.7	ENST00000311189.7.1	1	1	1	1	1	2.3727	1	1.57802	0.247841	-0.388748
chr11:207723-207768:+	RIC8A	ENST00000526104.5	ENST00000526104.5.1	80.7443	85.1514	92.8743	98.8912	36.2771	62.7715	82.8511	79.4733	0.434641	0.572308
chr11:803397-804419:-	PIDD1	ENST00000347755.9	ENST00000347755.9.1	1.4809	2.55574	1.58333	2.31085	1.9848	2.05742	2.10305	1.73313	0.271069	0.0266387
chr11:904826-910780:-	CHID1	ENST00000323578.12	ENST00000323578.12.1	3.24421	15.0044	6.81132	5.51683	11.7581	24.3338	9.55989	10.5996	0.162363	-0.912207
chr11:9384690-9384747:+	IPO7	ENST00000379719.7	ENST00000379719.7.1	35.7261	29.0049	62.0555	36.393	51.6957	176.825	59.5042	182.386	0.364692	-0.931309
chr11:10294145-10294196:-	SBF2	ENST00000256190.12	ENST00000256190.12.1	6.65309	24.3754	12.6666	24.3899	8.70273	38.7493	18.5529	22.6113	0.174199	-0.342392
chr11:33257633-33257789:+	HIPK3	ENST00000379016.7	ENST00000379016.7.1	38.7736	43.0757	15	22.3522	39.9905	27.6997	12.0305	24.19	0.252397	0.231287
chr11:45650651-45650939:-	CHST1	ENST00000308064.6	ENST00000308064.6.1	1	1	1	1	1.86627	1	1.359	1	0.195333	-0.289975
chr11:45805361-45805604:+	SLC35C1	ENST00000314134.3	ENST00000314134.3.1	1.80758	5.67508	4.18181	5.17761	1.96284	2.79494	5.17925	5.48909	0.496297	0.233292
chr11:45804475-45804685:+	SLC35C1	ENST00000314134.3	ENST00000314134.3.2	1.80758	5.67508	6.13331	9.66294	7.06391	8.54985	6.54742	4.75329	0.658513	-0.0404896
chr11:46084271-46121030:-	PHF21A	ENST00000323180.10	ENST00000323180.10.1	5.8455	4.29516	4.92	8.46207	26.1219	2.9126	6.57734	4.78897	0.605851	0.0750107
chr11:60924572-60924599:+	TMEM132A	ENST00000005286.8	ENST00000005286.8.1	17.7883	43.0757	15.9545	15.5831	16.3268	26.8022	12.4982	19.6933	0.29605	0.25233
chr11:63839071-63839188:+	MARK2	ENST00000361128.9	ENST00000361128.9.1	55.5619	5.51692	16.931	13.8047	17.8497	29.927	31.8008	29.2238	1.18356	0.104972
chr11:66342181-66345124:-	BRMS1	ENST00000359957.7	ENST00000359957.7.1	5.02098	3.48919	4.26667	5.39291	5.18112	6.4509	3.58273	4.37399	0.274479	-0.0240689
chr11:65615984-65616086:+	PCNX3	ENST00000355703.3	ENST00000355703.3.1	10.691	52.4258	20.0909	12.7299	22.1825	31.9323	14.3473	23.3915	0.511638	0.0244161
chr11:66257782-66257824:+	KLC2	ENST00000316924.9	ENST00000316924.9.1	118.518	85.1514	51.8665	39.0428	125.743	87.4801	48.1866	68.581	0.191896	-0.167482
chr11:66438782-66438821:-	MRPL11	ENST00000430466.6	ENST00000430466.6.1	3.23388	2.55574	2.85841	2.37088	4.6201	11.9951	3.80001	3.72767	0.213154	-0.797578
chr11:67373623-67373704:-	CLCF1	ENST00000312438.7	ENST00000312438.7.1	1	1	1	1.86629	1	2.3727	2.07699	1.86702	0.27499	-0.462686
chr11:67483052-67483085:+	AIP	ENST00000279146.7	ENST00000279146.7.1	126.912	25.7137	54.7726	96.1566	160.394	111.502	80.6147	59.5782	0.499505	-0.27088
chr11:69294302-69294482:+	MYEOV	ENST00000308946.3	ENST00000308946.3.1	1	1	1	1	1	1	1	1	0	0
chr11:69294196-69294265:+	MYEOV	ENST00000308946.3	ENST00000308946.3.2	1	1	1	1	1	1	1	1	0	0
chr11:68460764-68460794:+	PPP6R3	ENST00000393800.6	ENST00000393800.6.1	135.306	300.205	86.9089	47.6337	224.498	274.854	171.649	114.403	0.261228	-0.611742
chr11:72793479-72793587:-	ARAP1	ENST00000359373.9	ENST00000359373.9.1	47.1677	47.7508	34.2498	23.2806	58.174	43.5537	51.9774	55.3335	0.245119	-0.421381
chr11:74170788-74170860:-	C2CD3	ENST00000313663.11	ENST00000313663.11.1	63.956	57.1009	14.0454	4.74224	26.9882	14.2377	7.53343	8.16885	1.22903	1.14164
chr11:78127418-78139628:-	ALG8	ENST00000299626.9	ENST00000299626.9.1	11.8083	9.71216	9.925	6.43624	9.98068	13.491	11.3223	7.50733	0.169275	-0.137279
chr11:94129186-94129243:+	PANX1	ENST00000227638.7	ENST00000227638.7.1	38.7736	33.7255	25.2666	33.9192	18.1191	57.9671	31.3787	37.0977	0.606409	0.150971
chr11:94768424-94768493:+	AMOTL1	ENST00000317829.12	ENST00000317829.12.1	143.7	150.602	25.2558	21.6867	74.3393	59.4325	41.9764	98.4339	0.945372	0.403002
chr11:108009040-108009148:+	CUL5	ENST00000393094.6	ENST00000393094.6.1	84.9413	17.4758	6.07086	7.4998	24.6692	40.5823	12.94	13.1759	1.27992	0.296368
chr11:108197326-108222615:-	NPAT	ENST00000278612.8	ENST00000278612.8.1	147.897	178.653	16.8594	21.4799	21.7011	11.4778	18.3634	19.6933	5.9591	2.60816
chr11:112074360-112074453:+	C11orf57	ENST00000532163.5	ENST00000532163.5.1	21.9853	19.7003	16.1666	16.3269	32.1858	10.199	14.3871	15.5314	0.455619	0.259895
chr11:114296440-114296464:+	NNMT	ENST00000535401.5	ENST00000535401.5.1	1	1	1	1	1	1	1	1	0	0
chr11:117179159-117179435:+	SIDT2	ENST00000324225.8	ENST00000324225.8.1	2.61517	10.3502	5.45453	13.1281	3.69794	4.56204	3.77298	3.0039	1.37046	1.13619
chr11:119334866-119335034:+	RNF26	ENST00000311413.4	ENST00000311413.4.1	8.1484	9.23791	7.67441	7.59638	7.01031	7.03052	3.71059	4.56881	0.349013	0.633948
chr11:119334533-119334578:+	RNF26	ENST00000311413.4	ENST00000311413.4.2	5.63211	52.4258	15	9.42492	23.2803	40.8083	19.5689	19.4207	0.387973	-0.525727
chr11:117229843-117232337:-	PCSK7	ENST00000320934.7	ENST00000320934.7.1	4.23033	47.7508	2.4	6.04429	2.4716	3.22058	3.81568	3.24856	5.83318	2.25005
chr11:117316026-117316098:-	BACE1	ENST00000313005.10	ENST00000313005.10.1	26.1824	4.29516	1.82353	2.81708	3.82057	6.8851	4.20485	5.47342	2.74134	1.07471
chr11:127000554-127000623:-	KIRREL3	ENST00000525144.6	ENST00000525144.6.1	1	1	1	1	1	1	1	1	0	0
chr12:6821871-6823525:+	GPR162	ENST00000311268.7	ENST00000311268.7.1	5.19707	1	1.93333	4.46518	4.46509	0.592997	1.62689	1.59101	0.665803	0.775082
chr12:6341823-6341955:-	TNFRSF1A	ENST00000162749.6	ENST00000162749.6.1	3.29084	4.61353	3.1	4.77607	4.44569	5.45143	3.3662	3.34727	0.263858	-0.0238923
chr12:12611921-12611999:+	CREBL2	ENST00000228865.2	ENST00000228865.2.1	5.19707	1	2.27272	2.35808	2.5851	3.24367	3.76551	4.05407	0.665206	-0.191037
chr12:21773684-21774624:-	KCNJ8	ENST00000240662.2	ENST00000240662.2.1	9.39413	5.67508	2.74999	4.46518	3.21914	7.8635	3.51297	5.25998	0.925032	0.398244
chr12:15882404-15882425:+	STRAP	ENST00000419869.6	ENST00000419869.6.1	13.9565	29.0089	24.625	27.7342	154.641	89.4314	74.5647	84.2256	0.102959	-1.8968
chr12:26938525-26938597:+	FGFR1OP2	ENST00000229395.7	ENST00000229395.7.1	6.65309	43.0757	35.9997	31.3203	72.9006	45.7704	19.4215	38.443	0.626467	-0.112198
chr12:12662450-12695506:-	GPR19	ENST00000540796.5	ENST00000540796.5.1	1	1	1	1	0.68298	1	0.582075	0.471465	0.406669	0.656087
chr12:12891053-12891359:+	GPRC5A	ENST00000014914.5	ENST00000014914.5.1	15.5365	99.1766	133.124	68.7701	50.2023	127.975	74.1369	39.1323	0.638855	0.21334
chr12:29371657-29381143:-	ERGIC2	ENST00000360150.8	ENST00000360150.8.1	47.1677	57.1009	12.8276	9.7305	13.9987	24.3342	14.0616	14.9695	1.1035	0.863589
chr12:48852113-48852137:-	DDX23	ENST00000308025.7	ENST00000308025.7.1	164.686	127.227	42.0453	154.334	175.121	178.765	53.7901	112.719	0.255409	-0.0728783
chr12:49566197-49568050:-	MCRS1	ENST00000343810.8	ENST00000343810.8.1	5.48843	3.55664	4.69919	4.6913	3.58858	1.5303	2.55648	2.18358	0.303463	0.97088
chr12:56042107-56042425:+	RPS26	ENST00000356464.10	ENST00000356464.10.1	1	1	1.24138	3.21916	1.46417	0.71073	3.15398	1.46439	0.69885	0.227086
chr12:46243229-46243274:-	SLC38A1	ENST00000398637.9	ENST00000398637.9.1	14.85	145.927	16.75	22.4738	30.735	29.0242	20.3011	33.0433	1.89399	0.810682
chr12:47079626-47079713:-	AMIGO2	ENST00000266581.4	ENST00000266581.4.1	9.39413	1	3.62498	4.46518	2.73254	6.4908	7.46193	3.91472	1.28179	0.383591
chr12:57523001-57524039:+	MBD6	ENST00000355673.7	ENST00000355673.7.1	1.80758	19.7003	1.49412	4.29819	2.39775	4.36551	3.15739	5.6062	1.67041	0.701878
chr12:58920380-58920407:-	LRIG3	ENST00000320743.7	ENST00000320743.7.1	105.927	103.852	60.2664	28.7436	71.1681	36.5802	45.9077	38.9113	0.77004	0.673305
chr12:56153874-56153946:+	MYL6B	ENST00000553066.5	ENST00000553066.5.1	1.76361	2.86689	1.89865	2.20928	2.53813	2.8837	2.26543	2.60111	0.105902	-0.244482
chr12:67648866-67649076:+	DYRK2	ENST00000344096.3	ENST00000344096.3.1	8.26825	4.29516	19.6666	8.4744	4.34831	7.95538	6.83836	9.36785	0.910809	0.637365
chr12:68746253-68746652:+	SLC35E3	ENST00000398004.3	ENST00000398004.3.1	2.61517	2.18655	2.61538	5.33282	2.52407	3.07026	2.63276	3.31735	0.325125	0.120755
chr12:69359778-69359814:+	YEATS4	ENST00000247843.6	ENST00000247843.6.1	38.7736	7.59033	39.2665	19.5348	34.6042	103.953	56.793	35.2253	0.373714	-0.713431
chr12:71686547-71686595:+	TMEM19	ENST00000266673.9	ENST00000266673.9.1	26.1824	1	12.2	7.65749	34.8846	18.0424	35.6878	26.768	0.250537	-1.48007
chr12:84912658-84912793:-	SLC6A15	ENST00000266682.9	ENST00000266682.9.1	17.7883	38.4006	13.0689	26.5298	31.6354	32.5304	15.9387	27.1226	0.226021	-0.17591
chr12:75480744-75480972:+	GLIPR1	ENST00000266659.7	ENST00000266659.7.1	1	5.67508	2.74999	2.73259	1	7.51205	4.43411	5.62413	0.189968	-0.483218
chr12:88141334-88142064:-	CEP290	ENST00000552810.5	ENST00000552810.5.1	15.5365	131.902	49.5331	51.5955	13.6107	14.1252	13.1867	14.3447	3.002	2.15645
chr12:88142403-88142460:+	TMTC3	ENST00000266712.10	ENST00000266712.10.1	12.3062	113.202	21.6316	43.8467	59.9658	192.492	32.0411	22.681	0.64966	-0.233777
chr12:98515560-98515671:+	TMPO	ENST00000556029.5	ENST00000556029.5.1	20.7637	29.4566	29.3962	28.6315	70.1885	34.6828	61.7634	56.1709	0.200063	-0.908598
chr12:107093196-107093238:-	CRY1	ENST00000008527.9	ENST00000008527.9.1	13.5912	29.0505	23.7498	28.7214	26.9882	43.5537	32.2327	21.8787	0.305103	-0.312857
chr12:109477650-109477710:+	UBE3B	ENST00000434735.6	ENST00000434735.6.1	42.9707	3.25846	7.67441	7.9844	26.5295	18.3562	14.8864	20.6615	0.558728	-0.567461
chr12:109093363-109093411:-	ALKBH2	ENST00000343075.7	ENST00000343075.7.1	38.7736	19.7003	31.6248	23.5236	27.8544	24.3359	11.2392	16.3174	0.735818	0.690853
chr12:110281241-110281448:+	ATP2A2	ENST00000308664.10	ENST00000308664.10.1	25.2055	155.049	28.1506	22.2748	90.0285	143.417	46.6044	108.212	0.345015	-0.88167
chr12:118061110-118061170:-	WSB2	ENST00000315436.7	ENST00000315436.7.1	13.5912	19.7003	10.6249	4.71343	20.9243	11.5821	9.45321	7.04383	0.428307	0.0508772
chr12:113185626-113185857:+	RITA1	ENST00000548278.1	ENST00000548278.1.1	3.42275	0.688852	0.704226	1.16249	1.64994	2.57057	2.4797	1.52006	0.735811	-0.238203
chr12:113226730-113226832:+	TPCN1	ENST00000335509.10	ENST00000335509.10.1	9.39413	2.64758	3.54545	8.89104	4.24921	6.78539	4.72485	5.95347	0.700937	0.276433
chr12:114683414-114683447:-	TBX3	ENST00000349155.6	ENST00000349155.6.1	68.1531	57.1009	56.1246	17.4852	38.2497	25.8272	32.9506	23.8694	0.540644	0.684483
chr12:121888771-121888981:+	PSMD9	ENST00000541212.5	ENST00000541212.5.1	5.46775	2.66117	5.23943	6.4164	3.45812	6.92155	4.46509	6.48545	0.430887	0.045578
chr12:123671137-123671179:+	TCTN2	ENST00000303372.6	ENST00000303372.6.1	34.5765	4.29516	8.95452	5.85028	29.587	24.1992	7.52858	11.8985	0.436648	-0.402008
chr12:124011641-124011851:+	ZNF664	ENST00000539644.5	ENST00000539644.5.1	2.61517	1.31115	2.23529	2.28024	3.50665	4.66605	2.13931	2.33915	0.298718	-0.39287
chr12:123973929-123973992:+	FAM101A	ENST00000389727.8	ENST00000389727.8.1	1	1	0.363638	0.365953	1.24071	1	0.430883	0.633707	0.151074	-0.309625
chr12:131711104-131711152:+	SFSWAP	ENST00000261674.8	ENST00000261674.8.1	15.5365	99.1766	32.4999	56.7014	85.8947	68.2623	87.159	47.9032	0.533658	-0.326307
chr12:131929292-131929409:+	PUS1	ENST00000376649.7	ENST00000376649.7.1	24.4199	13.3569	10.3662	21.1484	16.4055	12.2184	11.5142	13.2968	0.282133	0.342695
chr12:132822200-132822248:-	GOLGA3	ENST00000456883.6	ENST00000456883.6.1	126.912	141.252	123.499	74.8044	44.1148	98.4617	65.9874	59.0574	0.625932	0.897172
chr13:26254461-26254539:+	CDK8	ENST00000381527.7	ENST00000381527.7.1	26.1824	5.11895	7.36362	26.1225	9.87657	40.8083	14.309	13.5385	1.02685	0.384192
chr13:25301686-25301713:+	NUP58	ENST00000381736.7	ENST00000381736.7.1	22.8048	122.552	62.5998	98.0249	154.33	149.938	92.1361	94.2712	0.328364	-0.57542
chr13:27621925-27621961:+	POLR1D	ENST00000636817.1	ENST00000636817.1.1	0.192416	5.67508	2.90909	1.27955	0.837514	1.15487	2.01677	0.655619	1.72237	1.09388
chr13:32522224-32538637:-	N4BP2L2	ENST00000504114.5	ENST00000504114.5.1	0.308241	0.851587	0.301109	0.263774	0.302844	0.31758	0.368189	0.410061	0.814182	0.367477
chr13:30307422-30307470:-	KATNAL1	ENST00000380615.7	ENST00000380615.7.1	13.5912	24.3754	12.3749	6.57014	25.2556	29.1404	9.77643	20.0745	0.35243	-0.430652
chr13:48975931-48976012:+	FNDC3A	ENST00000492622.6	ENST00000492622.6.1	105.927	141.252	97.2493	63.1999	42.7755	46.3221	34.1587	93.7715	0.939398	1.17738
chr13:102798845-102798974:-	KDELC1	ENST00000376004.4	ENST00000376004.4.1	2.61517	43.0757	9.93102	8.63688	12.7298	33.5603	15.3417	8.961	0.398424	-0.367676
chr14:20461461-20461596:-	TMEM55B	ENST00000250489.8	ENST00000250489.8.1	63.956	66.4511	46.4997	57.3091	15.8535	40.122	31.5147	33.3689	1.05071	1.1511
chr14:23299591-23307260:+	BCL2L2	ENST00000553824.5	ENST00000553824.5.1	1	1	0.385966	0.301124	0.440901	0.172282	0.38152	0.417857	2.02145	1.29349
chr14:22982388-22982466:-	AJUBA	ENST00000262713.6	ENST00000262713.6.2	30.3795	47.7508	14.3636	27.947	10.7476	20.2178	35.8226	29.0262	0.99031	0.711984
chr14:22911368-22919182:-	RBM23	ENST00000359890.7	ENST00000359890.7.1	6.53619	5.01414	9.98333	5.77893	10.1363	9.20713	9.09472	9.7916	0.221319	-0.475274
chr14:31026330-31026360:-	STRN3	ENST00000355683.9	ENST00000355683.9.1	9.88342	47.7508	12.8276	31.6358	21.4236	28.7699	26.0755	25.9222	0.506261	-0.061362
chr14:49620883-49620925:+	MGAT2	ENST00000305386.3	ENST00000305386.3.1	3.23388	29.0505	17.2272	7.98065	15.9	26.1665	27.1203	19.2598	0.33652	-0.759265
chr14:59484525-59486770:+	JKAMP	ENST00000261247.13	ENST00000261247.13.1	1.47189	15.0252	6.83332	5.38715	7.49958	4.83681	6.26403	9.22195	1.12085	0.315492
chr14:63543325-63543346:-	PPP2R5E	ENST00000337537.7	ENST00000337537.7.1	34.5765	29.0505	18.7333	12.0958	45.1799	43.5537	26.2845	14.0018	0.0732486	-0.410763
chr14:60249399-60249474:+	PPM1A	ENST00000395076.8	ENST00000395076.8.1	5.8455	10.0617	8.27999	5.72704	27.6297	38.8943	16.0952	9.50313	0.165528	-1.33338
chr14:57268708-57268816:-	EXOC5	ENST00000621441.4	ENST00000621441.4.2	3.42275	7.59033	8.9655	6.2383	6.52453	36.4093	8.03636	9.17229	0.326769	-0.66154
chr14:69398697-69398787:+	SLC39A9	ENST00000556605.5	ENST00000556605.5.2	2.7871	29.0505	9.16665	3.20741	17.4851	15.8082	4.73044	6.1901	0.785599	0.154789
chr14:73355752-73366981:-	NUMB	ENST00000554546.5	ENST00000554546.5.1	42.9707	47.7508	12.1034	24.6731	10.6284	11.841	12.2685	15.4819	1.39053	1.41358
chr14:73147865-73148072:+	PSEN1	ENST00000324501.9	ENST00000324501.9.1	4.70569	61.776	7.29293	6.92381	9.69614	5.68944	5.82959	7.17595	4.32045	1.7612
chr14:67816002-67816576:-	ZFYVE26	ENST00000347230.8	ENST00000347230.8.1	34.5765	29.0505	11.1818	10.5107	8.70273	19.3152	17.9388	14.3125	1.35061	0.772898
chr14:75657510-75660871:-	C14orf1	ENST00000256319.6	ENST00000256319.6.1	5.03792	24.3754	24.6248	11.6761	22.2404	32.2411	14.6588	29.754	0.562545	-0.388901
chr14:99481425-99481458:+	CCNK	ENST00000555049.5	ENST00000555049.5.1	30.3795	43.0757	63.9995	8.4744	18.1744	64.1442	32.6995	17.9028	0.633013	0.255094
chr14:105168070-105168794:-	JAG2	ENST00000331782.7	ENST00000331782.7.1	5.19707	1	2.5909	3.85321	23.5231	9.14007	7.74094	11.0731	0.0966217	-1.98133
chr15:34987641-34988197:-	ZNF770	ENST00000356321.4	ENST00000356321.4.1	38.7736	7.59033	5.78947	8.14942	30.2429	18.1907	25.4638	22.4147	0.415441	-0.804479
chr15:51622671-51622719:-	DMXL2	ENST00000251076.9	ENST00000251076.9.1	30.3795	85.1514	48.2497	62.5069	67.703	66.8896	31.1145	42.4788	0.437514	0.246081
chr15:52019250-52045844:+	MAPK6	ENST00000261845.6	ENST00000261845.6.1	9.39413	1.82379	4.86206	4.80428	2.63856	2.69187	3.15387	5.08615	1.12922	0.749328
chr15:50424572-50439025:+	USP8	ENST00000396444.7	ENST00000396444.7.1	51.3648	18.2996	18.8889	16.7612	6.31791	20.6686	12.0764	16.7179	3.03301	1.53383
chr15:57706727-57708746:+	POLR2M	ENST00000299638.7	ENST00000299638.7.1	1	1	3.65517	1.39392	1.95106	1.09563	1.18361	0.935428	0.980091	0.585817
chr15:56918222-56918447:-	RP11-566D24.2	ENST00000559000.6	ENST00000559000.6.1	30.3795	24.3754	5.66665	19.1922	7.03424	8.73306	10.774	9.07154	1.36216	1.28563
chr15:63042693-63042897:+	TPM1	ENST00000358278.7	ENST00000358278.7.1	72.3501	35.5992	8.24778	13.8139	14.5581	12.7558	10.1695	12.056	1.64702	1.28057
chr15:69337390-69337423:+	PAQR5	ENST00000395407.6	ENST00000395407.6.1	5.19707	1	1.87499	2.73259	6.19763	7.8635	4.58996	4.13893	0.268033	-0.975368
chr15:78540430-78541915:+	PSMA4	ENST00000044462.11	ENST00000044462.11.1	15.2668	32.1148	24.9836	22.4614	49.7175	54.6736	28.4215	29.7395	0.214355	-0.661564
chr15:83207716-83207875:-	RP11-382A20.3	ENST00000299633.6	ENST00000299633.6.1	3.42275	19.7003	8.9655	2.43442	12.8346	9.98666	12.7006	21.3314	0.730394	-0.386761
chr15:99731407-99731999:-	LYSMD4	ENST00000344791.6	ENST00000344791.6.1	2.34033	2.80677	2.39999	2.20356	3.4071	3.31416	2.91584	2.05161	0.139015	-0.221392
chr15:90875625-90875691:+	FURIN	ENST00000268171.7	ENST00000268171.7.1	68.1531	5.94275	8.81394	14.4612	46.4889	78.5576	16.7278	45.7714	0.526992	-0.746312
chr16:381842-381941:-	TMEM8A	ENST00000431232.6	ENST00000431232.6.1	5.03792	0.176209	18.4999	17.4596	4.24972	13.2101	16.5856	18.2641	0.471699	-0.290632
chr16:2155812-2163905:+	TRAF7	ENST00000326181.10	ENST00000326181.10.1	9.07584	5.94275	20.5999	3.69795	17.8497	21.5381	8.82133	4.21488	0.800596	-0.00109293
chr16:3024154-3024238:+	THOC6	ENST00000326266.12	ENST00000326266.12.1	16.3441	10.9372	18.7442	12.4616	19.6859	25.7389	18.2172	26.2807	0.250691	-0.536236
chr16:10942339-10942432:-	DEXI	ENST00000331808.4	ENST00000331808.4.1	0.192416	0.176209	0.681819	0.675026	1.63404	1.407	0.545122	0.421196	0.664361	-0.36941
chr16:3609375-3609543:-	SLX4	ENST00000294008.3	ENST00000294008.3.1	21.9853	2.80677	7.75861	9.90634	4.36994	5.21478	14.3736	11.8357	1.90598	0.796189
chr16:27257536-27268723:-	NSMCE1	ENST00000361439.8	ENST00000361439.8.1	4.39688	94.5015	14.16	22.4234	10.772	13.3356	14.5671	19.5727	2.71764	1.26488
chr16:24729736-24729790:+	TNRC6A	ENST00000315183.11	ENST00000315183.11.1	72.3501	57.1009	27.5999	25.4108	46.0247	97.089	41.2728	73.1955	0.464489	-0.332791
chr16:30958721-30958859:+	SETD1A	ENST00000262519.13	ENST00000262519.13.1	139.503	122.552	35.6817	31.4342	26.9957	17.6759	19.4972	29.2238	2.39693	1.90753
chr16:30610210-30610351:-	ZNF689	ENST00000287461.7	ENST00000287461.7.1	7.48496	4.11148	6.12676	3.50665	6.53634	4.40716	3.21308	3.49265	0.388406	0.318712
chr16:50025273-50025297:+	TMEM188	ENST00000458059.7	ENST00000458059.7.1	13.5912	5.67508	7.99995	6.57014	15.7266	11.2953	8.66072	7.59327	0.167138	-0.342081
chr16:50742783-50742819:+	CYLD	ENST00000427738.7	ENST00000427738.7.1	30.3795	43.0757	46.4997	9.90634	46.0462	55.908	50.1825	43.824	0.260185	-0.631011
chr16:50266583-50288087:+	ADCY7	ENST00000394697.6	ENST00000394697.6.1	1.61762	10.3502	4.11111	8.42686	12.1401	4.58987	4.33683	4.87272	0.802673	0.34073
chr16:56191568-56191607:+	GNAO1	ENST00000262493.11	ENST00000262493.11.1	5.19707	1	1.46666	1.86629	2.73254	2.3727	1.26416	3.02306	0.573953	0.035946
chr16:67183465-67183561:-	KIAA0895L	ENST00000290881.11	ENST00000290881.11.1	2.61517	10.3502	6.24996	9.66294	1.63404	2.62801	4.55236	5.25998	1.02429	1.12908
chr16:71789414-71808832:-	AP1G1	ENST00000299980.8	ENST00000299980.8.1	8.37385	8.72462	10.9848	5.30252	8.45284	17.8322	9.75998	9.58199	0.273517	-0.340627
chr16:72093409-72093457:-	TXNL4B	ENST00000562153.5	ENST00000562153.5.1	2.61517	15.0252	12.3749	6.07237	11.3953	9.92255	6.01909	5.76181	0.669683	0.279053
chr16:77191221-77193648:+	MON1B	ENST00000248248.7	ENST00000248248.7.1	2.38155	3.30154	2.84052	1.97787	1.8086	1.41326	1.64184	1.65391	0.445621	0.717838
chr16:81007267-81011982:+	CENPN	ENST00000393335.7	ENST00000393335.7.1	2.92361	9.13045	6.74528	10.3703	4.52075	3.16248	4.31982	5.00316	0.812854	0.841578
chr16:84995942-84995987:-	ZDHHC7	ENST00000313732.8	ENST00000313732.8.1	13.5912	24.3754	3.72222	7.65749	15.3893	12.5708	5.86962	5.75479	0.495932	0.259117
chr16:84700023-84700050:+	USP10	ENST00000219473.11	ENST00000219473.11.1	139.503	117.877	133.124	37.5882	91.9586	62.8645	45.9396	40.243	0.714257	0.852789
chr16:88570413-88570434:+	ZC3H18	ENST00000301011.9	ENST00000301011.9.1	156.291	169.303	171.624	173.392	164.725	114.248	118.024	135.75	0.212334	0.367965
chr16:89954247-89955225:+	DEF8	ENST00000563594.5	ENST00000563594.5.1	5.91453	5.11895	4.29412	3.35231	2.20763	3.0807	3.30868	3.06355	0.609859	0.751215
chr16:89949465-89954263:+	DEF8	ENST00000563594.5	ENST00000563594.5.2	5.91453	29.0505	4.67948	2.68698	5.5722	5.55949	5.13118	5.21643	1.91392	0.947459
chr17:3636788-3637243:+	CTNS	ENST00000046640.7	ENST00000046640.7.1	1.80758	3.47137	3.8	10.5107	5.85025	8.43381	6.94421	5.92955	0.590642	-0.395743
chr17:2511820-2511883:-	METTL16	ENST00000263092.10	ENST00000263092.10.1	72.3501	75.8012	28.0454	48.3462	19.7754	13.5446	23.9923	38.7702	1.84214	1.54485
chr17:2593954-2638121:+	PAFAH1B1	ENST00000397195.9	ENST00000397195.9.1	177.277	48.7799	57.5832	131.898	72.9724	178.86	103.129	122.714	0.828336	0.116132
chr17:4833500-4833551:+	MINK1	ENST00000355280.10	ENST00000355280.10.1	51.3648	3.47137	12.7727	39.9832	23.8255	51.1036	29.7937	24.5921	0.851985	0.0970593
chr17:4986245-4987629:-	CAMTA2	ENST00000348066.7	ENST00000348066.7.1	5.03792	5.94275	7.03447	3.7955	13.3638	16.0591	6.34553	6.58927	0.300658	-0.718082
chr17:9836430-9842551:+	GLP2R	ENST00000574745.5	ENST00000574745.5.1	1	1	1.87499	5.33147	1	1	1.52833	3.02306	0.31197	0.319165
chr17:14069533-14069557:+	COX10	ENST00000261643.7	ENST00000261643.7.1	30.3795	1.82379	4.69444	2.37872	6.62629	14.727	4.91067	8.77468	1.81757	0.569389
chr17:15945162-15945219:+	ADORA2B	ENST00000304222.2	ENST00000304222.2.1	5.19707	5.67508	7.12496	8.79665	17.4592	13.3543	8.52265	8.17471	0.312498	-0.602353
chr17:17232803-17232866:-	FLCN	ENST00000285071.8	ENST00000285071.8.1	26.1824	1.90338	33.3748	35.6518	21.8878	19.7222	20.0156	26.4573	0.591052	0.10691
chr17:18039135-18039168:-	ATPAF2	ENST00000585101.5	ENST00000585101.5.1	2.61517	15.0252	4.62068	9.8194	7.03424	9.14007	6.6515	7.70231	0.494461	-0.00534452
chr17:19282004-19282073:+	EPN2	ENST00000314728.9	ENST00000314728.9.1	1.89355	47.7508	18.7333	12.1403	9.34243	11.1244	22.1052	22.0523	1.64356	0.559023
chr17:21284844-21284889:+	MAP2K3	ENST00000342679.8	ENST00000342679.8.1	11.4986	57.1009	13.3103	9.12434	7.98873	10.1626	7.90505	6.64455	1.78774	1.33844
chr17:21126955-21178266:+	DHRS7B	ENST00000395511.7	ENST00000395511.7.1	5.46775	5.96861	5.02362	5.60525	5.457	4.72344	5.63874	5.16103	0.136102	0.0849377
chr17:28598968-28598998:-	SPAG5	ENST00000321765.9	ENST00000321765.9.1	36.5129	702.261	92.4882	23.6483	54.2542	53.871	34.6627	25.8537	5.08904	2.11203
chr17:29930000-29930033:-	SSH2	ENST00000269033.7	ENST00000269033.7.1	63.956	47.7508	12.2778	16.8512	6.87054	39.6653	19.7163	20.3851	3.65379	1.58038
chr17:40140435-40140516:+	CASC3	ENST00000264645.11	ENST00000264645.11.1	131.109	192.678	171.624	98.0134	50.7722	90.9477	58.1804	100.265	0.741975	1.10907
chr17:40256394-40260559:+	WIPF2	ENST00000323571.8	ENST00000323571.8.1	84.9413	43.0757	6.43529	4.39349	6.78958	5.29128	7.90505	7.40217	5.05352	2.4633
chr17:39451191-39451245:-	MED1	ENST00000394287.7	ENST00000394287.7.1	13.1138	14.1807	11.6944	7.62224	22.8744	18.7754	11.9456	11.5433	0.151217	-0.430575
chr17:44117682-44123592:-	HDAC5	ENST00000225983.10	ENST00000225983.10.1	34.5765	2.35507	4.07017	4.77393	5.54961	3.68205	11.6108	7.12825	2.46143	0.980084
chr17:48728687-48728720:-	HOXB13	ENST00000290295.7	ENST00000290295.7.1	21.9853	15.0252	5.37497	4.46518	6.19763	9.2362	9.6159	3.16714	1.09258	0.836522
chr17:44324716-44324764:-	SLC25A39	ENST00000225308.12	ENST00000225308.12.1	17.9593	6.76654	4.69811	1.81018	13.5069	20.204	5.19036	3.40744	0.380018	-0.36729
chr17:49678054-49678099:-	SPOP	ENST00000393328.6	ENST00000393328.6.2	122.715	113.202	121.749	135.276	113.615	51.0614	96.8519	50.3799	0.665197	0.855838
chr17:59155749-59169748:+	PRR11	ENST00000262293.8	ENST00000262293.8.1	8.59518	61.776	11.5	50.6671	9.5903	19.3294	10.1551	20.5785	0.947406	0.942376
chr17:59964610-59964694:-	RNFT1	ENST00000305783.12	ENST00000305783.12.1	5.03792	5.11895	7.99998	8.29154	18.1744	15.7528	6.72273	8.92802	0.390593	-0.55594
chr17:62065211-62065253:-	MED13	ENST00000397786.6	ENST00000397786.6.1	44.6095	323.58	109.733	59.0116	93.8345	109.263	169.01	103.013	1.03917	0.220025
chr17:64214235-64263190:-	TEX2	ENST00000258991.7	ENST00000258991.7.1	9.88342	3.47137	17.7999	13.0469	35.6509	9.75032	15.0003	22.0618	0.356331	-0.730208
chr17:68248377-68248410:+	AMZ2	ENST00000359904.7	ENST00000359904.7.2	42.9707	47.7508	35.9997	33.9192	65.1041	62.0852	53.7724	42.0391	0.063129	-0.461225
chr17:74987634-74987730:+	CDR2L	ENST00000337231.5	ENST00000337231.5.1	5.19707	5.67508	13.2499	4.71343	7.96259	15.4134	9.14954	12.2713	0.439076	-0.487455
chr17:73286554-73286608:-	CDC42EP4	ENST00000335793.3	ENST00000335793.3.1	26.1824	8.41412	4.5	7.25851	39.116	5.71171	7.10064	11.9947	0.363168	-0.242388
chr17:75514060-75514165:-	CASKIN2	ENST00000321617.7	ENST00000321617.7.1	47.1677	47.7508	7.51162	13.0469	34.7846	16.8731	24.2463	29.0262	1.00395	0.30605
chr17:75979280-75979424:+	TEN1	ENST00000397640.5	ENST00000397640.5.1	0.553225	5.67508	1.48276	3.32089	4.46509	3.7454	2.03707	1.61081	0.739621	0.146859
chr17:77089165-77093272:+	SEC14L1	ENST00000392476.6	ENST00000392476.6.2	0.398284	0.387972	0.853249	1.33202	2.1959	4.9282	4.16374	5.82603	0.057165	-2.5277
chr17:78997819-78997939:-	CANT1	ENST00000302345.6	ENST00000302345.6.1	5.02098	5.94275	30.3999	26.994	17.609	9.20817	23.4374	19.7579	0.452194	-0.154484
chr17:82023611-82023770:+	LRRC45	ENST00000306688.7	ENST00000306688.7.1	10.691	15.8282	4.80701	7.01034	6.03707	4.75487	4.16724	3.59356	0.794804	1.03634
chr17:81295141-81295186:-	SLC38A10	ENST00000374759.7	ENST00000374759.7.1	80.7443	127.227	55.0908	58.5582	69.1594	49.8866	47.9377	83.0286	0.693298	0.47828
chr18:5895103-5895286:-	TMEM200C	ENST00000581347.2	ENST00000581347.2.1	9.39413	5.67508	1.97674	3.59888	3.78503	2.44635	3.80004	2.03492	0.769922	0.825883
chr18:2571529-2573062:+	NDC80	ENST00000261597.8	ENST00000261597.8.1	59.9536	15.0013	26.3982	17.4983	32.1489	21.5309	21.3684	21.8754	0.459985	0.200659
chr18:9708368-9775333:+	RAB31	ENST00000578921.5	ENST00000578921.5.1	1.47189	1	1.9899	2.06958	1.52702	2.11852	2.02217	1.97585	0.230026	-0.206143
chr17:81893566-81893587:+	ANAPC11	ENST00000571570.5	ENST00000571570.5.1	2.33632	15.8282	2.28198	1.65408	8.69064	3.2493	1.86073	3.13383	1.85076	0.785406
chr18:25322174-25352151:-	ZNF521	ENST00000361524.7	ENST00000361524.7.1	10.691	5.94275	5.33999	8.26831	5.09208	2.89193	6.23587	4.45779	0.505043	0.779389
chr18:36067511-36067532:-	RPRD1A	ENST00000399022.8	ENST00000399022.8.1	51.3648	103.852	22.4666	20.9725	114.482	111.502	73.8762	39.6053	0.232677	-0.853536
chr18:26226826-26226922:+	TAF4B	ENST00000269142.9	ENST00000269142.9.1	17.7883	38.4006	10.5454	11.6761	4.21482	10.3611	5.73435	11.7237	1.31994	1.42782
chr18:32091999-32092050:+	RNF138	ENST00000261593.7	ENST00000261593.7.1	42.9707	10.8855	3.68687	6.13418	6.37906	7.36371	2.56951	4.9002	2.31727	1.44641
chr18:36129220-36129250:-	SLC39A6	ENST00000269187.9	ENST00000269187.9.1	93.3354	113.202	13.2807	29.404	30.0731	110.891	53.814	31.7809	1.06985	0.405027
chr18:49813751-49813823:-	ACAA2	ENST00000285093.14	ENST00000285093.14.1	38.7736	5.51692	6.65656	6.84153	42.7755	11.7105	11.4322	11.1716	0.160915	-0.636987
chr19:1652560-1652590:-	TCF3	ENST00000453954.6	ENST00000453954.6.1	34.5765	29.0505	17.7999	13.5328	80.697	23.3852	28.828	42.9405	0.358129	-0.619637
chr19:2737331-2737364:-	AC006538.4	ENST00000586572.1	ENST00000586572.1.1	2.61517	10.3502	7.53331	3.16641	7.02339	5.33904	4.47451	7.23671	0.709201	0.147984
chr19:2785505-2790550:+	THOP1	ENST00000307741.10	ENST00000307741.10.1	11.4995	8.35661	9.5433	12.0859	11.901	9.01532	12.401	10.7728	0.125343	-0.0798411
chr19:6372801-6374810:+	ALKBH7	ENST00000245812.7	ENST00000245812.7.1	1.4809	0.76269	1.36129	1	1.07819	1.10679	1.22009	1.1095	0.253826	0.0284438
chr19:7070645-7075008:+	ZNF557	ENST00000414706.2	ENST00000414706.2.1	10.691	89.8264	16.2727	48.6462	21.7905	27.0813	29.0017	17.3673	1.27986	0.841904
chr19:9140443-9156000:+	ZNF317	ENST00000247956.10	ENST00000247956.10.1	8.59518	3.7358	7.42353	9.1342	8.63685	5.44116	4.06135	5.45954	0.470884	0.373696
chr19:15410575-15418975:-	AKAP8L	ENST00000397410.9	ENST00000397410.9.2	21.1049	37.2468	31.52	21.4865	21.5651	16.1095	27.045	25.0519	0.578382	0.409772
chr19:18155480-18155573:+	PIK3R2	ENST00000222254.12	ENST00000222254.12.1	30.3795	5.11895	4.22	5.81424	8.26828	12.2184	6.50907	11.6318	1.36726	0.38994
chr19:36115085-36115211:-	POLR2I	ENST00000221859.8	ENST00000221859.8.2	12.3062	10.0617	4.65671	8.71	4.80883	9.26846	3.96261	5.45984	0.584145	0.681474
chr19:40285183-40285231:-	AKT2	ENST00000392038.6	ENST00000392038.6.1	12.6162	89.8264	28.2758	21.9532	34.4721	58.7945	32.5849	42.0785	0.446757	-0.284869
chr19:40442048-40444434:-	SERTAD3	ENST00000322354.3	ENST00000322354.3.1	4.05445	6.76654	5.94117	5.52158	20.4952	21.3502	7.8417	5.98864	0.299936	-0.866172
chr19:43935004-43935106:-	ZNF45	ENST00000269973.9	ENST00000269973.9.1	6.24973	4.11148	5.025	6.79328	5.12394	5.01502	5.59945	5.73144	0.174533	0.0434214
chr19:47221700-47232612:-	BBC3	ENST00000341983.8	ENST00000341983.8.1	0.716696	0.648232	0.646067	0.664176	0.744096	0.5492	0.610175	0.677504	0.0857004	0.0644163
chr19:49877203-49877311:-	AKT1S1	ENST00000391835.1	ENST00000391835.1.1	38.7736	61.776	7.21126	5.02703	5.88308	6.41155	5.49902	8.48416	3.7474	2.18028
chr19:52025929-52028290:-	ZNF614	ENST00000356322.10	ENST00000356322.10.1	13.5912	10.3502	12.3749	10.5292	9.66272	7.17715	4.80258	4.40551	0.533766	0.966318
chr19:55339858-55341838:+	KMT5C	ENST00000255613.7	ENST00000255613.7.1	47.1677	8.41412	4.19298	5.71212	8.60849	5.91758	6.10958	14.0029	2.04326	0.999155
chr19:55247086-55258474:-	PPP6R1	ENST00000412770.6	ENST00000412770.6.1	41.3792	178.653	24.1875	27.3663	52.0306	15.5357	27.4565	17.3741	4.52025	1.88272
chr19:57435342-57435417:+	ZNF749	ENST00000334181.4	ENST00000334181.4.1	2.33632	3.80034	4.89622	2.37611	2.63856	2.04035	1.86478	2.34244	0.702563	0.675375
chr20:448023-462500:-	TBC1D20	ENST00000354200.4	ENST00000354200.4.1	5.91453	2.64758	14.0454	7.66196	5.53744	6.43929	6.94826	5.46486	0.581506	0.293586
chr20:408240-408705:+	RBCK1	ENST00000356286.9	ENST00000356286.9.1	1.13815	1.23731	1.98823	3.06808	1.60591	1	1.48207	1.40737	0.527206	0.450902
chr20:3149113-3149209:-	FASTKD5	ENST00000380266.3	ENST00000380266.3.1	131.109	108.527	20.0351	26.0274	63.6633	28.3045	23.7397	24.5953	1.18121	0.962707
chr20:6006125-6006206:+	CRLS1	ENST00000378863.8	ENST00000378863.8.1	5.02098	3.71015	3.07042	2.60947	3.71507	3.80967	5.62448	3.86723	0.310126	-0.173783
chr20:10420618-10420750:-	MKKS	ENST00000347364.7	ENST00000347364.7.2	0.528108	0.52538	0.858586	0.934012	0.553447	0.296038	0.341175	0.359591	0.663702	0.971389
chr20:5950801-5950846:+	MCM8	ENST00000610722.4	ENST00000610722.4.1	63.956	5.66723	8.59154	7.82883	33.0279	13.9005	9.4405	11.017	0.574289	-0.012749
chr20:17969074-17969119:+	MGME1	ENST00000377710.9	ENST00000377710.9.1	10.691	5.06522	20.25	28.9226	66.8367	90.9119	25.9059	49.1675	0.298836	-1.33498
chr20:21126036-21132099:+	KIZ	ENST00000620891.4	ENST00000620891.4.1	21.9853	4.29516	6.55171	15.3895	4.41221	28.2692	10.1944	7.87095	1.8801	0.95097
chr20:31722819-31722855:-	BCL2L1	ENST00000307677.4	ENST00000307677.4.1	9.39413	33.7255	17.6249	12.6045	12.2615	11.2953	14.2829	7.56827	0.827382	0.733655
chr20:32743437-32743488:-	RP11-503P21.4	ENST00000642484.1	ENST00000642484.1.1	5.19707	5.67508	15.8749	13.1281	20.9243	15.2451	8.08663	12.1719	0.682685	-0.127253
chr20:32743437-32743716:-	COMMD7	ENST00000278980.10	ENST00000278980.10.1	9.39413	10.3502	5.5862	6.3894	5.07421	12.8601	9.81507	7.02088	0.48786	0.0480193
chr20:33686269-33686320:-	E2F1	ENST00000343380.5	ENST00000343380.5.1	5.8455	33.7255	7.99997	9.55963	20.9594	25.0132	8.56217	11.9935	0.382086	-0.252135
chr20:35147273-35147315:-	EDEM2	ENST00000374492.7	ENST00000374492.7.1	9.39413	15.0252	13.2499	5.64179	11.3953	8.73306	11.8661	12.3551	0.462416	0.0419959
chr20:35394194-35411979:-	UQCC1	ENST00000374385.9	ENST00000374385.9.1	10.691	12.5331	28.5332	20.3384	12.0727	61.3988	14.7726	16.3275	0.623847	0.0931635
chr20:34369398-34369449:+	ITCH	ENST00000374864.8	ENST00000374864.8.1	13.9213	8.67876	10.2235	5.40666	17.3536	6.79088	11.5947	11.9085	0.292923	-0.227702
chr20:43591012-43591033:+	IFT52	ENST00000373030.7	ENST00000373030.7.1	26.1824	29.0505	6.55171	13.5328	19.7042	66.2033	29.0012	11.1925	0.476181	-0.320763
chr20:46613525-46670106:-	SLC13A3	ENST00000472148.5	ENST00000472148.5.1	1	1	1	0.535821	1	1	1.359	1.28901	0.240431	-0.343951
chr20:45934707-45937464:+	PCIF1	ENST00000372409.7	ENST00000372409.7.1	13.5912	9.23791	13.0909	6.2383	9.87657	8.81028	6.21177	7.80622	0.491813	0.414466
chr20:45881238-45882563:+	ZSWIM1	ENST00000372523.1	ENST00000372523.1.1	13.9213	52.4258	57.8746	8.12854	19.1027	38.0629	12.2685	13.1748	1.67497	0.895383
chr20:46358686-46358725:-	SLC35C2	ENST00000543605.5	ENST00000543605.5.1	1.89355	29.0505	7.53331	4.12926	25.2556	16.7861	5.08766	5.0128	0.64199	0.0391556
chr20:58309738-58309789:+	RAB22A	ENST00000244040.3	ENST00000244040.3.1	9.39413	15.0252	8.87494	7.06406	18.3254	23.6496	21.8218	16.3174	0.0889376	-1.00899
chr20:58651292-58651319:+	STX16	ENST00000355957.9	ENST00000355957.9.1	38.7736	5.94275	9.39997	10.2836	11.676	39.4356	16.5856	14.9316	1.25099	0.240914
chr20:57391531-57391564:+	RBM38	ENST00000356208.9	ENST00000356208.9.1	26.1824	5.67508	7.53331	7.93035	18.1744	19.5315	21.8218	9.57896	0.462511	-0.461812
chr20:63215581-63215899:-	YTHDF1	ENST00000370339.7	ENST00000370339.7.1	3.48174	2.87268	4.9421	4.25852	5.12438	9.24885	7.8184	10.061	0.150747	-0.9676
chr20:63659282-63659357:+	RTEL1	ENST00000370018.7	ENST00000370018.7.1	26.1824	24.3754	17.6249	13.9944	13.1278	12.668	13.944	10.8899	0.343366	0.693243
chr21:32279017-32279047:-	MIS18A	ENST00000290130.3	ENST00000290130.3.1	59.7589	89.8264	28.5332	38.1343	52.9763	40.122	21.1467	39.2776	0.490515	0.507682
chr21:42879413-42879524:-	WDR4	ENST00000330317.6	ENST00000330317.6.1	15.5365	71.1261	13.2093	11.4831	12.3134	11.9922	11.4457	8.47993	2.02529	1.27813
chr22:20131925-20139484:+	ZDHHC8	ENST00000334554.11	ENST00000334554.11.1	5.8455	19.7003	3.86363	1.97843	5.09208	2.41895	2.45079	1.81256	2.98165	1.58016
chr22:20394284-20394377:+	ZNF74	ENST00000400451.6	ENST00000400451.6.1	26.1824	47.7508	4.58139	4.7372	5.43829	3.38227	6.39461	4.92666	5.42532	2.3653
chr22:26482167-26482227:-	HPS4	ENST00000398145.6	ENST00000398145.6.2	17.7883	38.4006	15.9333	12.6045	19.1917	16.8731	20.0197	24.9877	0.681382	0.170894
chr22:26481911-26481983:-	HPS4	ENST00000398145.6	ENST00000398145.6.3	17.7883	38.4006	15.9333	12.6045	10.2834	7.59705	8.62616	13.3837	1.57547	1.25902
chr22:26510617-26512432:-	TFIP11	ENST00000407690.5	ENST00000407690.5.1	31.6882	6.79346	11.2083	9.58376	16.5745	10.4793	7.96136	13.492	0.522118	0.225989
chr22:29267808-29267898:-	RHBDD3	ENST00000216085.11	ENST00000216085.11.1	4.23033	24.3754	10.3333	1.98107	18.6386	10.5459	8.81072	6.32499	0.83944	0.00875626
chr22:29603617-29603653:+	NF2	ENST00000338641.8	ENST00000338641.8.2	55.5619	33.7255	47.3747	61.6406	78.9645	83.362	75.6712	61.5366	0.213748	-0.547959
chr22:35257507-35257555:+	HMGXB4	ENST00000216106.5	ENST00000216106.5.1	101.73	155.278	124.374	46.2539	54.7089	79.9303	39.9062	54.2956	0.802336	0.958041
chr22:37188190-37188235:-	C1QTNF6	ENST00000337843.6	ENST00000337843.6.1	1	1	1.87499	1.86629	2.73254	3.05905	1.52833	2.44504	0.363634	-0.576161
chr22:38872195-38872216:-	CBX6	ENST00000407418.7	ENST00000407418.7.1	76.5472	66.4511	47.3747	44.3147	127.476	93.6573	56.3102	49.2566	0.11628	-0.390726
chr22:39152544-39152622:-	CBX7	ENST00000216133.9	ENST00000216133.9.1	1	5.67508	1.87499	2.73259	1	3.05905	2.07699	3.02306	0.400159	0.220899
chr22:41621243-41621992:+	XRCC6	ENST00000360079.7	ENST00000360079.7.1	64.8889	552.659	118.32	105.213	57.852	76.4999	82.2258	139.122	2.66046	1.39796
chr22:41833193-41833232:+	SREBF2	ENST00000361204.8	ENST00000361204.8.1	189.868	178.653	79.8664	130.078	233.161	136.939	107.571	109.202	0.239505	0.0188307
chr22:36233235-36239518:-	APOL2	ENST00000249066.10	ENST00000249066.10.1	4.23033	38.4006	12.1363	12.4128	12.7948	7.70513	6.48091	6.44704	1.68835	1.18783
chr22:42695562-42695631:-	A4GALT	ENST00000642412.1	ENST00000642412.1.1	1	15.0252	3.62498	5.33147	7.93018	4.43175	3.90579	3.46631	1.20307	0.580784
chr22:46762773-46792558:+	TBC1D22A	ENST00000337137.8	ENST00000337137.8.1	10.691	57.1009	8.77777	6.87056	9.14842	10.6478	5.23634	7.80433	1.80703	1.18396
chr22:49883336-49883576:+	ZBED4	ENST00000216268.5	ENST00000216268.5.2	63.956	43.0757	10.9167	19.0703	8.48065	15.5839	7.74705	10.7024	2.45636	1.75452
chrX:3713350-3713575:-	PRKX	ENST00000262848.5	ENST00000262848.5.1	1	1	1	1	1	2.3727	1	1	0.250515	-0.225388
chrX:14873458-14873705:+	MOSPD2	ENST00000380492.7	ENST00000380492.7.1	68.1531	12.5331	10.4561	10.4541	9.44928	11.5941	12.2627	13.448	2.73409	1.31086
chrX:13703849-13703876:+	RAB9A	ENST00000464506.1	ENST00000464506.1.1	18.7668	188.003	61.7726	17.9386	153.464	66.5152	56.0905	69.7934	1.07762	0.106711
chrX:47561218-47561248:+	ARAF	ENST00000377045.8	ENST00000377045.8.1	6.80808	47.7508	9.68964	12.0728	22.8161	44.9264	9.56982	11.2728	0.325701	-0.215605
chrX:49922670-49923461:+	CLCN5	ENST00000376088.7	ENST00000376088.7.1	6.3613	9.23791	10.7674	23.1916	18.061	14.6785	22.6637	24.6784	0.219825	-0.739123
chrX:53225154-53225196:-	KDM5C	ENST00000375401.7	ENST00000375401.7.1	286.4	16.2463	50.5599	37.6211	134.354	196.546	89.1266	83.5022	0.784858	-0.307495
chrX:81121670-81201833:-	HMGN5	ENST00000358130.6	ENST00000358130.6.1	17.7883	24.3754	21.1249	13.5328	25.2556	25.8272	34.7456	43.1952	0.225922	-0.63857
chrX:77786133-77786268:-	ATRX	ENST00000373344.9	ENST00000373344.9.1	202.459	318.905	49.0344	55.9052	114.722	166.65	61.7536	118.031	0.615484	0.306285
chrX:53654124-53680074:-	HUWE1	ENST00000342160.7	ENST00000342160.7.1	915.96	188.001	188.833	164.137	301.535	235.379	253.574	270.882	1.00757	0.374898
chrX:103376402-103377041:+	BEX3	ENST00000361298.8	ENST00000361298.8.1	4.17756	11.579	8	12.1925	14.3966	33.8561	12.8118	27.782	0.127496	-1.23831
chrX:134373342-134377581:+	PHF6	ENST00000370803.7	ENST00000370803.7.1	22.8048	8.67876	13.1739	10.91	11.36	19.1148	14.8276	19.102	0.61397	-0.0287393
chrX:154488984-154489035:-	SLC10A3	ENST00000393587.4	ENST00000393587.4.1	17.7883	1	13.2499	2.58512	5.75531	7.10505	5.42116	9.713	1.30297	0.570891
chrX:153971136-153971172:-	HCFC1	ENST00000310441.11	ENST00000310441.11.1	311.583	43.0133	176.466	78.3537	169.655	325.644	169.741	380.756	0.69481	-0.315603
chrX:55182561-55182804:-	MTRNR2L10	ENST00000545075.2	ENST00000545075.2.1	1	1	1	1	1	1	0.735837	1	0.15545	0.123996
chr2:65227758-65239880:+	ACTR2	ENST00000260641.9	ENST00000260641.9.1	4.35561	7.11532	9.08889	11.5571	4.72265	15.4554	8.63638	9.82876	0.27067	-0.147641
chr2:74472443-74472706:-	MRPL53	ENST00000258105.7	ENST00000258105.7.1	2.52722	1.57539	2.2844	1.61356	2.1516	2.04757	2.05713	2.00376	0.179489	-0.0515046
chr2:161179642-161179744:+	TANK	ENST00000259075.6	ENST00000259075.6.1	51.3648	57.1009	6.03508	6.24341	4.04813	4.73522	4.5736	4.2422	5.49378	2.78338
chr3:5122293-5170519:+	ARL8B	ENST00000256496.7	ENST00000256496.7.1	0.764054	1	3.84375	4.89969	2.322	5.69359	2.75323	5.27424	0.487162	-0.499322
chr3:17508512-17623884:-	TBC1D5	ENST00000253692.11	ENST00000253692.11.1	30.3795	8.41412	9.30231	7.33699	7.18592	8.93065	5.33096	7.38697	1.33771	0.983312
chr3:51385134-51386283:+	MANF	ENST00000528157.5	ENST00000528157.5.1	2.80736	4.31128	4.23135	5.59109	3.96529	4.31362	4.69992	4.82467	0.163423	-0.0867384
chr3:57757213-57757402:+	SLMAP	ENST00000295951.7	ENST00000295951.7.1	2.61517	2.55574	8.63634	2.59424	4.67901	6.06242	6.65963	10.424	0.399498	-0.663043
chr3:157159970-157160468:-	CCNL1	ENST00000461804.5	ENST00000461804.5.1	13.9213	9.13045	4.43396	10.9334	6.23827	36.6902	6.70957	10.4079	0.739839	0.0675629
chr3:172112475-172133490:+	FNDC3B	ENST00000336824.8	ENST00000336824.8.1	13.9213	11.3889	23.931	28.9226	23.5084	10.7937	16.6972	28.1376	0.29786	0.0385978
chr4:39062588-39062669:+	KLHL5	ENST00000261425.7	ENST00000261425.7.1	5.19707	10.3502	8.87494	11.3955	18.3254	15.6521	18.5908	14.901	0.183506	-0.871051
chr4:65670116-65670155:-	EPHA5	ENST00000273854.7	ENST00000273854.7.1	9.39413	29.0505	26.3748	31.3203	5.26822	5.96179	12.4077	27.8777	1.42973	1.30817
chr5:54307913-54310479:-	ARL15	ENST00000502271.5	ENST00000502271.5.1	1	1	3.33332	1	2.73254	1.22437	1	1.31712	1.17594	0.399243
chr5:83065013-83077351:-	TMEM167A	ENST00000502346.1	ENST00000502346.1.1	1	1	1	1	1.86627	1.68635	1	0.845204	0.272169	-0.27231
chr5:134758801-134758837:+	DDX46	ENST00000452510.6	ENST00000452510.6.1	282.203	337.605	305.498	124.005	157.426	234.62	199.305	352.434	0.550772	0.355078
chr6:3118706-3127257:+	BPHL	ENST00000380379.9	ENST00000380379.9.1	1	4.29516	2.77465	5.0921	3.06197	3.48856	2.81951	2.82307	0.52994	0.119568
chr6:2766139-2768712:+	WRNIP1	ENST00000380769.8	ENST00000380769.8.1	9.93551	2.93115	3.90341	6.19984	4.85023	4.74298	4.48843	3.90933	0.568052	0.356714
chr6:99416368-99416407:-	PNISR	ENST00000369239.9	ENST00000369239.9.1	72.0674	491.883	118.133	176.46	151.731	163.665	63.0512	51.2108	1.14923	1.13746
chr9:70413817-70413976:-	KLF9	ENST00000377126.3	ENST00000377126.3.2	12.3062	15.0044	4.67376	3.30576	16.7945	7.37166	8.12236	6.83694	0.629102	-0.0637464
chr10:15102227-15103378:+	RPP38	ENST00000378201.6	ENST00000378201.6.1	26.1824	19.7003	3.82456	4.43375	6.77705	3.22058	3.59731	3.97174	2.10679	1.60406
chr10:110918149-110919128:-	BBIP1	ENST00000448814.5	ENST00000448814.5.1	13.5912	10.3502	7.04544	9.18421	4.8802	10.4234	8.80617	14.9408	0.868756	0.376485
chr11:65014116-65018639:+	ARL2	ENST00000246747.8	ENST00000246747.8.1	2.24339	1.83173	2.29288	1.57216	2.20618	2.17948	2.12207	2.34498	0.160051	-0.148707
chr11:68263717-68268210:-	C11orf24	ENST00000304271.10	ENST00000304271.10.2	0.618194	0.23282	0.954839	0.952728	1.04514	2.17319	1.38473	1.27981	0.251989	-0.907384
chr11:108009116-108009362:+	CUL5	ENST00000393094.6	ENST00000393094.6.2	84.9413	9.58214	4.21311	7.99469	30.6074	34.2973	10.6924	9.73474	1.00642	0.0941892
chr14:64535967-64541454:+	HSPA2	ENST00000394709.2	ENST00000394709.2.1	3.23388	2.91795	4.08	7.28989	3.4872	3.42102	4.68548	4.57956	0.307862	0.0850537
chr16:58599464-58599506:-	CNOT1	ENST00000317147.9	ENST00000317147.9.1	52.8259	100.679	124.472	41.6083	311.531	379.92	41.1516	49.0244	1.15418	0.107022
chr16:70346831-70355524:+	DDX19A	ENST00000302243.11	ENST00000302243.11.1	2.71813	0.918126	2.20988	2.47491	2.98722	2.23019	3.19757	3.06014	0.186404	-0.503555
chr16:84101691-84101805:-	MBTPS1	ENST00000343411.7	ENST00000343411.7.3	11.7226	17.4758	21.8372	24.7231	9.72114	23.6112	26.6065	19.4631	0.231699	0.0132959
chr16:85799435-85799585:-	EMC8	ENST00000435200.2	ENST00000435200.2.1	34.5765	5.11895	7.99998	8.70278	13.5169	4.87178	5.58188	9.98333	0.655468	0.564058
chr17:28950181-28950964:-	PHF12	ENST00000332830.8	ENST00000332830.8.1	12.1694	94.5015	15.7778	9.24674	13.0286	14.7835	12.5756	18.1618	2.39323	1.18431
chr17:36532669-36533991:-	MYO19	ENST00000614623.4	ENST00000614623.4.1	1	5.67508	1	1	1	1	1	1.57802	2.08261	1.05464
chr18:74496281-74500007:+	CNDP2	ENST00000324262.8	ENST00000324262.8.1	15.2052	23.1329	37.2817	30.6425	50.2007	32.5111	52.1564	71.4126	0.179238	-0.89009
chr20:2923258-2964894:+	PTPRA	ENST00000380393.7	ENST00000380393.7.1	8.26825	5.11895	12.4545	8.70278	17.7361	9.02557	17.1214	9.71952	0.162845	-0.590659
chr20:47502006-47583223:+	NCOA3	ENST00000372004.7	ENST00000372004.7.1	9.07584	75.8012	8.38888	6.15063	23.8255	45.3634	12.752	20.3851	0.546312	-0.409528
chr20:63706706-63707113:-	ARFRP1	ENST00000612256.4	ENST00000612256.4.1	26.1824	15.0252	3.94737	5.38715	2.39775	2.70358	3.29954	3.89745	3.95871	2.25215
chrX:30859630-30859675:-	TAB3	ENST00000378933.5	ENST00000378933.5.1	34.5765	47.7508	13.1333	12.1403	15.5829	7.43692	12.7898	20.5967	2.30519	1.35839
chr1:16608532-16608640:-	NBPF1	ENST00000430580.6	ENST00000430580.6.1	0.073577	0.176209	0.300001	0.208148	0.301127	0.225644	0.0967689	0.100409	1.11499	0.631902
chr1:23791022-23793721:+	LYPLA2	ENST00000374514.7	ENST00000374514.7.1	1	1	2.75	1.26895	1.74047	2.08839	2.00697	2.17609	0.359452	-0.411793
chr1:28516838-28529885:+	RCC1	ENST00000373833.10	ENST00000373833.10.1	7.17615	9.08986	5.8125	8.75314	11.3855	13.187	10.9779	19.0702	0.0889334	-0.793319
chr1:93346149-93346221:+	DR1	ENST00000370272.8	ENST00000370272.8.1	47.1677	7.59033	7.99999	17.7104	14.4863	14.7439	25.7895	34.6148	1.21978	0.199333
chr2:38880599-38880650:+	MORN2	ENST00000409077.2	ENST00000409077.2.1	1	0.176209	0.416667	0.242174	0.293504	0.554135	0.35247	0.297918	1.18192	0.516045
chr2:45009255-45009375:-	SIX2	ENST00000303077.6	ENST00000303077.6.1	9.39413	5.67508	1.93333	0.682977	4.46509	2.22101	2.17898	2.64832	0.920164	0.537107
chr3:127822643-127822781:-	MGLL	ENST00000434178.6	ENST00000434178.6.1	1	1	1	1	2.73254	2.3727	3.51297	2.15603	0.067022	-1.38092
chr4:127880936-127881026:+	PLK4	ENST00000270861.9	ENST00000270861.9.1	4.5742	57.1009	19.7727	52.1113	7.65743	10.2566	10.1059	19.7303	1.81644	1.42792
chr5:6633524-6651928:+	SRD5A1	ENST00000274192.6	ENST00000274192.6.1	1	5.67508	1.28	1	0.731047	1.15487	1	1	1.60706	1.09794
chr5:79619623-79619707:+	PAPD4	ENST00000423041.6	ENST00000423041.6.1	38.7736	61.776	31.7999	17.6091	7.37695	6.72194	12.4455	8.78918	2.84307	2.2483
chr5:177351504-177351834:-	LMAN2	ENST00000303127.11	ENST00000303127.11.1	12.0524	7.93946	6.87356	5.11706	7.83536	7.73439	11.431	8.95888	0.392412	-0.0980428
chr6:20152683-20212241:-	MBOAT1	ENST00000324607.7	ENST00000324607.7.1	21.9853	10.3502	5.13635	3.21916	4.85136	10.8352	4.4147	3.9754	1.54475	0.899225
chr6:99521074-99526107:+	TSTD3	ENST00000452647.2	ENST00000452647.2.1	1	1	1	0.518576	1	0.551266	1	0.731908	0.412099	0.177131
chr6:159761942-159763024:+	ACAT2	ENST00000367048.4	ENST00000367048.4.1	3.6188	6.19262	5.91391	4.22659	4.70267	7.74	6.0082	6.00392	0.104021	-0.296067
chr7:7572438-7572495:+	MIOS	ENST00000340080.8	ENST00000340080.8.1	26.1824	19.7003	10.1724	36.518	21.4236	22.9845	12.3823	11.9947	0.913189	0.571748
chr7:16646159-16665451:+	BZW2	ENST00000258761.7	ENST00000258761.7.1	17.1517	6.93275	15.42	19.686	9.13418	10.575	7.34083	12.4195	0.550382	0.636681
chr7:23299309-23300860:+	MALSU1	ENST00000466681.1	ENST00000466681.1.1	2.38155	3.80034	3.84956	3.97449	4.02134	10.0712	3.99413	2.98948	0.363323	-0.293858
chr7:43650675-43650711:-	COA1	ENST00000310564.10	ENST00000310564.10.2	55.5619	38.4006	54.3746	9.93678	25.137	8.58868	10.6985	15.5876	1.77943	1.63243
chr8:38231803-38233065:+	DDHD2	ENST00000397166.6	ENST00000397166.6.1	21.9853	5.11895	7.34883	11.4618	17.168	21.2489	11.9456	11.7373	0.389549	-0.361594
chr8:65669880-65669952:+	MTFR1	ENST00000262146.8	ENST00000262146.8.1	26.1824	5.94275	5.88371	6.84953	3.59978	2.93208	6.63136	5.49618	2.58204	1.51521
chr8:142785326-142786553:-	LY6D	ENST00000301263.4	ENST00000301263.4.1	1	1	1	1	1	1	1	1	0	0
chr9:26947041-26947266:-	PLAA	ENST00000397292.7	ENST00000397292.7.1	17.9593	15.4541	12.2609	22.2157	15.8563	60.0085	15.3785	21.2581	0.340845	-0.30736
chr9:128340762-128345319:+	SLC27A4	ENST00000300456.4	ENST00000300456.4.1	5.46775	2.72616	4.69811	3.0883	3.74175	2.80583	3.56895	2.93863	0.19761	0.263096
chr14:69879511-69952144:+	SMOC1	ENST00000381280.4	ENST00000381280.4.1	8.26825	5.11895	42.9997	11.3506	14.9738	10.2923	13.0586	18.3757	1.18596	0.310359
chr15:65133410-65133833:-	PDCD7	ENST00000204549.8	ENST00000204549.8.1	3.47046	17.4758	4.03773	3.53383	5.85025	9.75032	4.51334	4.75126	0.466338	0.00860806
chr16:19521821-19522115:-	GDE1	ENST00000353258.7	ENST00000353258.7.1	4.12743	2.80677	3.40625	2.21633	6.21943	11.46	3.59835	4.01798	0.251298	-0.732903
chr19:10543919-10543991:+	ATG4D	ENST00000309469.8	ENST00000309469.8.1	9.39413	1.90338	7.99998	4.80428	26.9882	18.1588	7.43807	8.71661	0.357608	-0.943686
chr19:17555646-17559337:+	GLT25D1	ENST00000252599.8	ENST00000252599.8.1	105.927	8.67876	5.21986	4.73446	6.10533	5.32231	5.31231	5.64504	7.02081	2.37864
chrX:49062041-49062528:+	CCDC120	ENST00000597275.5	ENST00000597275.5.1	13.5912	2.64758	7.06664	4.71343	3.85318	3.03502	5.59718	4.75329	1.08533	0.73417
chr1:37794128-37794152:+	MANEAL	ENST00000373045.10	ENST00000373045.10.1	6.65309	29.0505	18.2666	15.8537	49.5112	9.09955	9.56982	18.9563	1.15497	0.60217
chr1:46594205-46594274:-	MKNK1	ENST00000371945.8	ENST00000371945.8.1	26.1824	5.94275	12.2	11.3506	12.1401	5.58129	9.17532	11.3216	0.460248	0.473438
chr1:51878615-51878642:-	NRDC	ENST00000354831.11	ENST00000354831.11.1	156.291	267.479	205.749	104.048	275.608	387.415	268.093	135.518	0.0819916	-0.518324
chr1:113929846-113929921:+	HIPK1	ENST00000369558.5	ENST00000369558.5.1	89.1384	16.652	13.46	21.9419	13.0121	55.2968	22.4304	31.096	2.73841	1.08019
chr1:153615900-153615933:-	S100A14	ENST00000368702.5	ENST00000368702.5.1	1	1	1	1	1	1	1	0.77579	0.125144	0.100644
chr2:20447274-20447358:+	RHOB	ENST00000272233.5	ENST00000272233.5.2	110.124	141.252	13.9294	12.7171	13.5114	47.3984	15.8997	18.4111	3.01037	1.66645
chr2:234995350-235034919:+	SH3BP4	ENST00000392011.6	ENST00000392011.6.1	51.3648	8.41412	63.9995	45.5612	29.7787	60.7125	57.2667	38.925	0.571102	0.0536428
chr2:237590512-237590752:-	RAB17	ENST00000264601.7	ENST00000264601.7.1	0.192416	1	1.87499	2.39254	1	0.592997	1.34569	1	0.794415	0.501983
chr3:129440161-129440359:+	IFT122	ENST00000347300.6	ENST00000347300.6.1	26.1824	52.4258	25.7332	16.5341	34.7846	14.9108	10.8104	20.3495	1.15502	0.899485
chr3:195442944-195442989:-	ACAP2	ENST00000326793.10	ENST00000326793.10.1	55.5619	178.653	72.7495	62.5069	76.3657	99.1481	49.0776	69.2059	0.432995	0.297189
chr4:169620664-169620691:+	CLCN3	ENST00000513761.5	ENST00000513761.5.2	42.9707	29.0505	68.3745	66.8383	72.9006	77.8712	76.0302	61.1136	0.277386	-0.436608
chr5:177600187-177604486:+	B4GALT7	ENST00000029410.9	ENST00000029410.9.1	2.54404	5.67508	1.61403	1.3801	1.78784	2.05193	1.75579	1.95882	0.801436	0.539163
chr8:97869105-97888201:+	MATN2	ENST00000521689.5	ENST00000521689.5.1	5.19707	24.3754	19.3749	11.4618	7.73989	19.224	15.8363	17.4084	0.290848	-0.0659438
chr8:98944688-98944790:+	OSR2	ENST00000297565.8	ENST00000297565.8.1	1	24.3754	6.13331	8.79665	10.529	12.668	6.28325	11.6933	0.655587	-0.0940443
chr8:124474803-124474857:+	RNF139	ENST00000303545.3	ENST00000303545.3.1	21.9853	43.0757	28.9998	27.8551	44.3136	36.0023	28.2837	22.2071	0.299007	-0.0100416
chr10:100912983-100913136:+	SLF2	ENST00000238961.8	ENST00000238961.8.1	34.1109	15.0024	17.7344	55.211	7.3027	27.6997	20.2851	17.874	1.68586	1.19783
chr10:103917593-103917656:-	OBFC1	ENST00000224950.7	ENST00000224950.7.1	21.9853	1	7.99995	12.2618	7.65743	9.95407	7.74094	7.70231	1.00302	0.484654
chr11:44095656-44095806:+	EXT2	ENST00000533608.5	ENST00000533608.5.1	5.2828	9.71216	7.22936	10.5961	12.8261	17.0281	14.1286	25.5061	0.0669875	-1.06691
chr11:65111948-65111972:+	TM7SF2	ENST00000279263.11	ENST00000279263.11.1	9.07584	43.0757	3.86363	6.10597	31.1712	29.4902	12.075	12.528	0.47982	-0.644311
chr11:86800567-86800609:+	PRSS23	ENST00000533902.2	ENST00000533902.2.1	0.106449	0.176209	0.805556	0.350052	0.518579	0.71073	0.344674	0.308442	0.866312	-0.0272145
chr11:125592875-125592905:+	STT3A	ENST00000392708.8	ENST00000392708.8.1	353.554	543.309	269.332	283.221	274.862	738.826	228.463	215.182	0.233034	0.175283
chr12:45216088-45216205:+	ANO6	ENST00000425752.6	ENST00000425752.6.1	13.1138	94.5015	28.3636	35.2385	41.2616	125.229	56.6559	50.329	0.17279	-0.815251
chr12:116277127-116277166:-	MED13L	ENST00000281928.7	ENST00000281928.7.1	84.9413	141.252	40.1998	28.264	20.4975	110.13	48.0166	51.7731	1.43384	0.767592
chr14:67674556-67674580:-	VTI1B	ENST00000554659.5	ENST00000554659.5.1	1.80758	15.0252	2.86666	9.66294	5.43829	7.73101	13.7467	8.91952	0.693283	-0.16498
chr14:67241166-67269705:+	MPP5	ENST00000261681.8	ENST00000261681.8.1	42.9707	99.1766	56.9996	30.2433	22.3519	32.3393	15.5141	18.1245	0.821097	1.36903
chr15:64093700-64093784:-	FAM96A	ENST00000300030.7	ENST00000300030.7.1	2.12211	2.18655	6.73999	10.2852	1.55656	2.21529	3.72102	6.60079	0.301045	0.51598
chr15:63157429-63157486:-	RPS27L	ENST00000330964.9	ENST00000330964.9.1	76.5472	66.4511	121.749	40.9449	59.3317	21.5604	25.4118	19.9288	1.3114	1.48773
chr15:70097510-70097540:-	TLE3	ENST00000558939.5	ENST00000558939.5.2	19.5285	8.83122	10.6158	7.22332	21.8416	32.2168	20.9812	22.2493	0.243472	-1.00084
chr15:98649282-98649369:+	IGF1R	ENST00000268035.10	ENST00000268035.10.1	135.306	127.227	32.6944	33.2059	76.6601	82.8077	29.9472	46.0219	0.402592	0.354646
chrX:47467502-47467697:-	ZNF41	ENST00000377065.8	ENST00000377065.8.1	9.39413	19.7003	8.31816	27.8551	5.33136	5.88404	6.01249	5.64388	1.40813	1.51464
chrX:154536173-154547060:-	G6PD	ENST00000621232.4	ENST00000621232.4.1	12.6162	8.77871	13.1484	12.329	22.2716	10.0923	15.8978	14.974	0.119882	-0.373918
chr6:106293079-106316208:-	ATG5	ENST00000636437.1	ENST00000636437.1.1	1.61762	1.23731	2.90909	2.10166	1.5524	1.27746	1.7251	1.66276	0.27958	0.310594
chr6:159688172-159730908:-	RP1-56L9.7	ENST00000546087.5	ENST00000546087.5.1	1.4447	1.10409	1.12227	1.36111	1.51905	2.14884	1.37768	1.53091	0.167799	-0.336174
chr8:43102587-43122120:+	POMK	ENST00000331373.9	ENST00000331373.9.2	2.28241	3.3731	3.2931	2.50686	2.7416	2.30012	3.67072	2.82966	0.258639	0.0292922
chr8:98045042-98045789:-	RPL30	ENST00000521726.1	ENST00000521726.1.1	2.63422	3.49334	2.44084	3.08673	3.22856	2.9909	2.86288	2.91485	0.145417	-0.0382115
chr20:5119692-5126538:-	PCNA	ENST00000379160.3	ENST00000379160.3.1	4.69537	5.6391	4.494	4.7426	6.31357	9.26348	4.67974	6.98893	0.131629	-0.419208
chr1:8871929-8878803:-	ENO1	ENST00000646539.1	ENST00000646539.1.1	6.33815	7.04748	6.30881	5.74742	5.29811	6.41775	5.73212	6.29758	0.102775	0.106909
chr3:9793006-9800190:+	ARPC4	ENST00000397261.7	ENST00000397261.7.1	2.44271	6.22082	4.53977	4.13025	3.83443	4.69786	4.24655	4.27563	0.246348	-0.00134405
chr12:122871041-122896189:-	VPS37B	ENST00000267202.6	ENST00000267202.6.1	5.03792	10.8855	7.51162	10.8277	4.60484	6.55754	3.98435	6.09206	0.305104	0.681827
chr15:72217470-72230987:-	PKM	ENST00000319622.10	ENST00000319622.10.1	5.65061	7.28125	4.72017	5.62103	5.07499	5.13245	5.00092	5.68797	0.185454	0.158397
chr17:15945055-15945469:+	ADORA2B	ENST00000304222.2	ENST00000304222.2.2	5.19707	5.67508	2.5909	3.21916	3.27481	7.91906	3.46064	4.30965	0.36809	-0.07428
chr20:35284408-35284845:-	EIF6	ENST00000374450.7	ENST00000374450.7.1	2.56277	5.29726	4.98611	4.29051	5.10202	2.87525	5.06052	6.39398	0.516168	0.000355442
chr20:4800983-4801049:-	RASSF2	ENST00000379400.7	ENST00000379400.7.1	13.5912	29.0505	16.7499	23.5236	23.5231	10.2566	9.46938	12.9193	0.798588	0.807314
chr1:43970019-43970097:+	DPH2	ENST00000255108.7	ENST00000255108.7.1	76.5472	15.0044	4.59292	3.644	9.18415	6.11075	2.8111	4.08892	2.94265	1.735
chr3:150762814-150762868:-	SIAH2	ENST00000312960.3	ENST00000312960.3.1	26.1824	5.11895	10.5454	10.7478	9.66272	6.29104	8.10473	20.9415	0.842293	0.416216
chr15:65607321-65611108:-	INTS14	ENST00000313182.6	ENST00000313182.6.1	11.1907	8.77871	8.10447	9.24878	13.8474	8.64833	11.8546	11.2021	0.118455	-0.263393
chr20:5109386-5113033:-	TMEM230	ENST00000612323.4	ENST00000612323.4.1	0.382385	0.548308	1.07609	0.462093	0.322933	0.29137	0.640101	1.02902	0.552563	0.377433
chr1:11982068-11982092:+	MFN2	ENST00000235329.9	ENST00000235329.9.1	21.9972	6.93275	15.5326	21.8478	21.2611	13.1049	32.4556	17.9526	0.31811	-0.295487
chr1:26111863-26111914:+	PDIK1L	ENST00000374271.8	ENST00000374271.8.1	30.3795	7.59033	7.99999	12.3135	9.87657	11.703	11.4235	14.3191	1.01608	0.401831
chr1:35557212-35557269:-	KIAA0319L	ENST00000325722.7	ENST00000325722.7.1	89.1384	11.7093	21.5172	31.1172	30.6074	45.2583	20.1403	31.1044	0.978116	0.389516
chr1:45691012-45691060:+	TMEM69	ENST00000372025.4	ENST00000372025.4.1	5.03792	2.64758	12.2	9.2426	10.7476	12.8601	7.0293	15.2854	0.584726	-0.4079
chr1:52142373-52216464:+	ZFYVE9	ENST00000357206.6	ENST00000357206.6.1	13.5912	10.3502	9.59089	9.18421	5.7515	4.94969	9.86887	11.5633	0.681757	0.636967
chr1:112619385-112619493:+	CAPZA1	ENST00000263168.3	ENST00000263168.3.1	13.9213	15.8282	45.8635	65.5208	31.2656	25.2149	67.718	60.6919	0.231559	-0.499284
chr1:113905495-113905570:+	DCLRE1B	ENST00000369563.3	ENST00000369563.3.2	2.65162	57.1009	7.23437	12.8347	4.40674	7.83923	8.89102	6.96613	2.72455	1.39805
chr1:113759066-113759126:-	PHTF1	ENST00000369604.5	ENST00000369604.5.1	30.3795	4.29516	5.39534	5.57353	13.6808	12.2815	4.71985	6.67077	0.686457	0.185533
chr1:179082103-179082193:+	TOR3A	ENST00000352445.10	ENST00000352445.10.1	59.7589	5.51692	10.5454	7.33699	6.21943	3.96453	10.7353	10.9475	3.72998	1.66135
chr1:203802093-203802192:+	ZC3H11A	ENST00000639812.1	ENST00000639812.1.2	4.12743	10.8855	11.5	3.8363	5.91568	2.63117	3.98716	1.9367	1.25729	1.27797
chr1:211829298-211830631:-	LPGAT1	ENST00000366997.8	ENST00000366997.8.1	21.9853	5.11895	3.24	7.49922	4.53782	16.1774	4.79379	8.45569	1.83802	0.74934
chr1:222712693-222712714:+	BROX	ENST00000340934.9	ENST00000340934.9.1	72.3501	94.5015	124.374	123.147	74.3393	82.8077	76.0145	111.311	0.251543	0.280061
chr1:241848809-241848917:+	EXO1	ENST00000366548.7	ENST00000366548.7.2	4.68692	13.1957	18.4186	12.7191	6.60894	7.87404	10.848	14.5969	0.452016	0.30867
chr2:53765501-53859947:-	GPR75-ASB3	ENST00000406625.5	ENST00000406625.5.1	3.88542	2.86689	6.70652	7.28782	5.59222	7.06816	5.29517	6.27115	0.349404	-0.180719
chr2:65431995-65432040:-	SPRED2	ENST00000356388.8	ENST00000356388.8.1	38.7736	2.64758	4.62068	8.29154	9.81928	7.10505	5.24248	8.37254	1.40538	0.630655
chr2:111121152-111123765:+	BCL2L11	ENST00000393256.7	ENST00000393256.7.1	2.17973	5.94275	2.0566	2.38574	2.61372	1.84104	1.36542	1.87767	0.909141	0.773716
chr2:166307064-166311764:-	SCN9A	ENST00000409672.5	ENST00000409672.5.1	9.88342	7.59033	10.6552	6.45123	4.02803	6.499	4.68092	5.36637	0.593415	0.827827
chr2:175136458-175151079:-	ATF2	ENST00000345739.9	ENST00000345739.9.2	47.1677	89.8264	16.909	14.632	6.02492	5.0871	11.7301	6.20032	6.4476	2.87223
chr2:199955476-199955536:-	TYW5	ENST00000354611.8	ENST00000354611.8.1	4.23033	29.0505	11.7333	11.7788	3.52213	7.6532	8.73162	10.8899	1.12406	0.891871
chr2:201045506-201045566:-	FAM126B	ENST00000418596.7	ENST00000418596.7.1	9.39413	5.11895	14.1249	8.46207	8.42676	9.54707	3.80007	13.5557	1.29994	0.583094
chr2:207769431-207769509:-	FZD5	ENST00000295417.3	ENST00000295417.3.1	17.7883	15.0252	14.9999	11.3955	9.66557	11.5821	5.26497	8.78484	0.633607	0.864699
chr2:218562685-218562772:-	USP37	ENST00000258399.7	ENST00000258399.7.1	34.5765	9.23791	35.9999	22.6641	16.8869	27.924	42.1656	37.9963	0.656125	-0.0631773
chr2:232550240-232550285:-	TIGD1	ENST00000408957.4	ENST00000408957.4.1	0.192416	5.67508	2.86666	2.26809	1.46417	4.43175	2.88066	2.47451	0.425963	-0.267215
chr3:23945457-23945511:+	NR1D2	ENST00000312521.8	ENST00000312521.8.1	55.5619	66.4511	15.9655	32.5642	29.8489	108.757	82.8511	87.9914	0.653687	-0.398194
chr3:49510435-49510459:+	DAG1	ENST00000308775.6	ENST00000308775.6.1	23.6123	159.953	47.1034	51.4067	127.719	162.292	123.034	156.377	0.306052	-1.0877
chr3:52700483-52704854:-	GLT8D1	ENST00000478968.6	ENST00000478968.6.1	30.3795	43.0757	11.8182	14.9254	21.8878	19.1737	10.675	13.6848	0.47034	0.544066
chr3:66500784-66500820:-	LRIG1	ENST00000383703.3	ENST00000383703.3.1	38.7736	43.0757	17.3333	7.25851	20.3382	14.3064	21.2694	26.5599	1.05146	0.586309
chr3:152299842-152299980:+	MBNL1	ENST00000355460.6	ENST00000355460.6.3	101.73	22.4186	32.4999	17.2969	15.7448	22.3149	13.7275	23.3042	2.28864	1.40266
chr4:5711349-5719288:+	EVC	ENST00000264956.10	ENST00000264956.10.1	1.80758	15.0252	1.46666	2.58512	1.8739	4.36551	2.32849	6.15682	1.21523	0.44789
chr4:17804650-17804689:-	DCAF16	ENST00000382247.5	ENST00000382247.5.1	17.7883	5.11895	10.2272	6.77709	11.4617	23.563	25.8665	30.4788	0.556149	-0.744824
chr4:77066297-77075543:-	CCNI	ENST00000237654.8	ENST00000237654.8.1	11.4986	1.82379	7.51723	7.03432	4.9132	5.79365	3.6607	5.97918	0.793509	0.557067
chr4:105708817-105717738:+	GSTCD	ENST00000394730.7	ENST00000394730.7.1	2.17973	6.76654	4.67948	4.92429	2.16588	4.14219	2.65662	3.68787	0.291394	0.520213
chr4:147617704-147617833:+	TMEM184C	ENST00000508208.5	ENST00000508208.5.2	9.39413	0.548308	7.99997	3.21916	7.25847	10.2566	4.52323	2.78764	0.628272	0.0946176
chr5:69094205-69094247:+	SLC30A5	ENST00000396591.7	ENST00000396591.7.1	51.3648	8.22706	14.2222	14.7206	10.6881	22.6237	12.3624	15.1769	1.74692	0.865885
chr5:150001014-150004883:+	HMGXB3	ENST00000503427.5	ENST00000503427.5.1	10.3823	89.8264	5.77647	10.2252	3.96728	8.37564	4.41276	8.80047	3.95038	1.98301
chr6:53041265-53041385:-	ICK	ENST00000350082.9	ENST00000350082.9.1	5.03792	2.80677	4.88888	3.71616	1.16455	1.6874	3.75651	3.13712	1.2865	1.08329
chr6:78867553-78867742:+	IRAK1BP1	ENST00000369940.6	ENST00000369940.6.1	3.68065	1.82379	5.5862	2.96214	1.82275	2.37465	2.10792	3.0039	0.766065	0.683362
chr6:97282439-97282520:-	MMS22L	ENST00000275053.8	ENST00000275053.8.1	18.4242	13.7571	18.36	17.4949	17.0579	39.2532	37.8632	20.4243	0.290359	-0.529049
chr6:95586431-95586506:+	MANEA	ENST00000358812.8	ENST00000358812.8.2	63.956	11.3889	23.3023	18.2236	11.2202	9.01604	22.0365	15.1517	1.96108	1.2053
chr6:156777382-156777520:+	ARID1B	ENST00000346085.9	ENST00000346085.9.1	21.9972	150.602	15.0986	14.9842	27.3854	36.45	38.9131	38.3191	1.56983	0.514512
chr7:1158246-1160132:-	ZFAND2A	ENST00000401903.5	ENST00000401903.5.1	1.80758	1	0.708333	0.642209	0.56305	0.894258	0.746604	0.42113	0.896465	0.766021
chr7:75486175-75486202:-	POM121C	ENST00000615331.4	ENST00000615331.4.1	5.03792	24.3754	11.7333	6.70642	6.70637	10.6089	8.94058	6.67754	0.586764	0.423723
chr7:101252018-101252120:-	FIS1	ENST00000474120.5	ENST00000474120.5.1	4.23033	29.0505	5.06	1.99045	5.69721	24.1992	5.2132	7.26595	0.342596	-0.32755
chr7:150368902-150388451:+	RP11-511P7.7	ENST00000478789.5	ENST00000478789.5.1	0.1572	0.0966169	0.0402195	0.100547	0.0816154	0.199081	0.0666657	0.0828518	0.57283	0.0800783
chr8:38176276-38176606:-	LSM1	ENST00000311351.8	ENST00000311351.8.1	1.92642	3.47137	2.61538	2.39868	3.43265	7.38526	3.10788	3.07308	0.152714	-0.592198
chr8:33453499-33461642:-	FUT10	ENST00000327671.9	ENST00000327671.9.1	9.39413	1	2.12	2.37872	1.85844	1	0.74807	0.795586	1.43583	1.57031
chr8:73294935-73294959:+	RDH10	ENST00000240285.9	ENST00000240285.9.1	1	15.0252	14.1249	9.66294	19.1027	32.5721	13.1198	25.8547	0.370804	-1.02621
chr8:144519619-144519967:+	LRRC14	ENST00000292524.5	ENST00000292524.5.1	4.12743	3.25846	5.08333	4.38637	4.49218	4.09742	2.83712	2.96386	0.407057	0.317802
chr10:38010753-38012345:+	ZNF33A	ENST00000469037.2	ENST00000469037.2.1	9.39413	0.688852	13.2499	6.07237	11.3953	1.93872	1.92717	2.81642	2.58157	1.35207
chr10:32056173-32056200:-	KIF5B	ENST00000302418.4	ENST00000302418.4.1	29.2654	272.154	67.4999	51.6959	94.5129	61.3425	137.732	81.5958	1.71808	0.553342
chr10:91222719-91222824:+	PCGF5	ENST00000336126.5	ENST00000336126.5.2	17.7883	2.64758	3.38	3.45268	4.93255	6.6734	4.21886	5.41829	1.30465	0.443986
chr10:112445458-112445542:-	ZDHHC6	ENST00000626395.2	ENST00000626395.2.2	30.3795	24.3754	6.79309	8.76045	6.29563	4.54736	3.32493	7.97666	1.80247	1.7363
chr10:124046318-124046444:-	CHST15	ENST00000346248.7	ENST00000346248.7.1	17.7883	10.3502	5.19998	4.48726	5.09208	5.33904	12.8873	8.37254	1.25129	0.671598
chr11:207788-207950:+	RIC8A	ENST00000526104.5	ENST00000526104.5.2	15.5365	85.1514	49.5331	13.9992	10.924	20.5199	19.5821	33.8868	1.38631	1.08993
chr11:68263865-68268196:-	C11orf24	ENST00000304271.10	ENST00000304271.10.3	1	0.28807	1.23333	1.32994	1.20883	5.96179	2.41868	1.95206	0.292813	-0.952612
chr12:46268860-46268905:-	SLC38A1	ENST00000398637.9	ENST00000398637.9.2	14.85	145.927	91.3634	52.995	30.735	99.9018	69.2395	130.489	0.476144	-0.124406
chr12:56041949-56041973:+	RPS26	ENST00000356464.10	ENST00000356464.10.2	1	1	0.83721	1.64995	0.440901	0.259806	0.369365	0.440823	0.765221	1.6001
chr12:56216458-56216524:-	RNF41	ENST00000345093.8	ENST00000345093.8.2	21.9853	3.71015	13.4091	10.8692	16.3177	40.122	16.7688	11.1123	0.45602	-0.314028
chr12:57755187-57755280:+	MARCH9	ENST00000266643.5	ENST00000266643.5.1	5.8455	24.3754	3.22727	4.17023	0.672288	3.8927	2.27275	1.82987	2.95861	2.22155
chr12:68808246-68808291:+	MDM2	ENST00000258149.9	ENST00000258149.9.1	74.4901	25.9334	51.7192	29.4672	15.6557	79.515	29.576	37.999	1.72719	0.927577
chr12:89656025-89656094:-	ATP2B1	ENST00000428670.7	ENST00000428670.7.1	28.4578	216.054	59.6551	23.2845	39.5778	90.61	119.744	62.3412	0.812367	-0.00898763
chr12:100142604-100142811:-	UHRF1BP1L	ENST00000279907.11	ENST00000279907.11.1	13.1138	9.23791	13.0689	5.52513	7.44501	24.4308	17.5044	12.2829	0.552981	-0.261891
chr13:29850116-29850173:-	UBL3	ENST00000380680.4	ENST00000380680.4.2	1	5.67508	3.79999	4.17023	5.43829	9.14007	12.0948	14.2284	0.162379	-1.5022
chr13:39601049-39601355:-	LHFP	ENST00000379589.3	ENST00000379589.3.1	9.39413	5.67508	1.36842	1.16249	0.92935	1.04263	1.42042	1.64695	3.84361	2.10606
chr13:41311220-41311412:+	NAA16	ENST00000379406.7	ENST00000379406.7.1	51.3648	66.4511	6.44444	6.35265	12.5541	60.7125	20.1584	15.6933	1.53873	0.563278
chr13:106535381-106535444:-	EFNB2	ENST00000646441.1	ENST00000646441.1.1	3.68065	9.23791	8.41999	25.6015	20.0161	14.5444	15.0002	19.5392	0.405969	-0.572056
chr13:102799221-102799323:+	BIVM	ENST00000257336.5	ENST00000257336.5.1	5.02098	5.11895	2.96491	8.29154	2.4716	10.5459	4.05032	2.76183	1.01765	0.644102
chr14:99971814-99971874:+	EVL	ENST00000402714.6	ENST00000402714.6.1	4.23033	71.1261	6.72726	9.8194	7.65743	18.1588	7.14646	13.2708	1.38053	0.620732
chr15:66703084-66703195:+	SMAD6	ENST00000288840.9	ENST00000288840.9.1	17.7883	5.67508	1.58333	4.80428	1.81243	4.25603	3.06321	3.09422	3.77843	1.72438
chr15:78123719-78131261:-	CIB2	ENST00000258930.7	ENST00000258930.7.1	1.80758	15.0252	2.93103	5.64179	3.06197	3.01577	3.29094	2.51379	1.73537	1.12226
chr15:82875400-82952621:-	HOMER2	ENST00000304231.12	ENST00000304231.12.1	17.7883	3.47137	3.27907	17.4596	1.91224	4.59523	4.90309	4.71454	3.5075	1.85098
chr15:89247637-89247730:+	FANCI	ENST00000300027.12	ENST00000300027.12.1	13.0138	31.3036	26.8523	19.1107	14.8395	19.0669	11.4975	13.4285	0.52273	0.650161
chr16:11668537-11676010:+	SNN	ENST00000329565.5	ENST00000329565.5.1	1	1	2.74999	2.39254	3.78503	3.7454	2.88066	5.64388	0.282993	-1.06662
chr16:25111843-25111894:+	LCMT1	ENST00000399069.7	ENST00000399069.7.1	59.7589	57.1009	31.7999	15.9389	14.1614	22.988	18.987	29.0112	1.33759	1.15834
chr16:29995981-29996272:+	INO80E	ENST00000563197.5	ENST00000563197.5.1	19.5744	15.0044	20.5517	23.1173	21.2197	46.5844	23.9937	31.2789	0.233417	-0.494023
chr16:30762115-30762223:+	RNF40	ENST00000324685.10	ENST00000324685.10.1	68.0295	290.855	333.498	161.606	118.932	151.591	208.896	125.127	0.498178	0.427256
chr16:56451289-56451310:-	NUDT21	ENST00000300291.9	ENST00000300291.9.1	131.109	10.967	27.7969	26.3407	26.9091	73.7894	25.3507	39.7157	1.86475	0.761422
chr16:58599326-58599386:-	CNOT1	ENST00000317147.9	ENST00000317147.9.2	95.4873	100.679	33.4403	51.0975	55.2192	98.7056	37.1157	28.4899	0.403299	0.444598
chr16:68266597-68274779:+	SLC7A6	ENST00000219343.10	ENST00000219343.10.1	5.03792	24.3754	4.28125	5.89213	7.99012	8.92245	4.78381	5.98905	0.830994	0.389896
chr16:89418324-89490305:-	ANKRD11	ENST00000301030.9	ENST00000301030.9.1	28.4578	33.9516	24.9531	32.8688	23.2606	52.49	34.8386	31.9035	0.234185	-0.145302
chr17:14301317-14301407:+	HS3ST3B1	ENST00000360954.2	ENST00000360954.2.1	5.19707	1	7.06664	2.58512	2.26808	3.44202	2.94164	2.38312	0.876708	0.60145
chr17:19867473-19867560:-	ULK2	ENST00000361658.6	ENST00000361658.6.1	84.9413	52.4258	28.9998	28.7214	17.2968	57.2807	29.8368	29.6373	1.71432	0.957373
chr17:35735123-35740485:+	RASL10B	ENST00000603017.1	ENST00000603017.1.1	1.80758	1	1.72414	1.24071	1.12957	0.94582	1.35745	1.21313	0.22981	0.307544
chr17:76729705-76729792:+	METTL23	ENST00000588783.5	ENST00000588783.5.1	3.16165	2.80677	1.55118	2.3164	1.991	2.33682	1.48455	1.6397	0.206124	0.391399
chr18:10454632-10454866:+	APCDD1	ENST00000355285.9	ENST00000355285.9.1	13.5912	1	5.19998	3.59888	5.81421	4.25229	5.59862	3.62792	0.761305	0.167854
chr18:50663190-50663238:+	MAPK4	ENST00000400384.6	ENST00000400384.6.1	13.5912	5.67508	1.95454	3.59888	6.07233	3.02489	6.28325	5.02922	0.795427	0.362053
chr18:74148596-74148623:+	TIMM21	ENST00000169551.10	ENST00000169551.10.1	34.5765	15.0252	13.5517	18.7533	13.2762	8.33122	13.5168	9.88402	0.567781	0.869437
chr19:35937227-35937341:+	LRFN3	ENST00000588831.5	ENST00000588831.5.1	30.3795	15.0252	7.53331	2.20356	8.63685	3.8927	3.83035	6.77844	1.40282	1.27338
chr19:38081398-38081497:+	SIPA1L3	ENST00000222345.10	ENST00000222345.10.1	13.1138	14.1807	6.55434	10.9334	6.07603	5.80057	9.39199	10.4104	0.731554	0.667002
chr19:38893847-38899521:-	SIRT2	ENST00000392081.6	ENST00000392081.6.1	6.86735	6.4203	14.8906	11.7343	13.0132	9.89358	14.8077	17.3559	0.177059	-0.484814
chr19:39831874-39834198:-	DYRK1B	ENST00000323039.9	ENST00000323039.9.1	8.78621	5.66696	4.97633	4.01907	3.45077	3.09722	2.40651	3.37546	0.488234	0.932511
chr19:42325917-42325989:+	MEGF8	ENST00000334370.8	ENST00000334370.8.1	51.3648	43.0757	16.3999	11.6761	21.0565	24.7673	20.4881	26.4345	0.785037	0.438493
chr19:47352776-47352818:+	DHX34	ENST00000328771.8	ENST00000328771.8.1	29.2654	89.8264	49.5331	35.2385	17.3683	19.5133	11.637	12.7384	1.17299	1.73457
chr19:49877134-49877185:-	AKT1S1	ENST00000391835.1	ENST00000391835.1.2	7.46067	61.776	14.2222	7.77274	28.2638	21.2489	14.2748	17.9389	1.05004	0.201895
chr20:3854587-3854638:+	MAVS	ENST00000428216.3	ENST00000428216.3.1	7.17615	89.8264	95.4993	34.4209	35.1809	17.6759	33.0982	57.6554	1.95757	1.13228
chr20:6768277-6768589:+	BMP2	ENST00000378827.4	ENST00000378827.4.1	1.61762	1	3.60465	5.0921	2.9696	9.75032	2.96789	5.72183	0.412705	-0.539635
chr20:6768191-6768278:+	BMP2	ENST00000378827.4	ENST00000378827.4.2	21.9853	1.82379	10.3333	5.0921	13.9968	12.5708	6.77994	11.8577	0.638263	-0.124476
chr21:31731896-31731953:-	SCAF4	ENST00000399804.5	ENST00000399804.5.1	38.9564	230.079	35.8772	53.577	42.3241	163.665	49.0272	76.4748	0.281966	-0.0898101
chr21:46636502-46636913:+	PRMT2	ENST00000355680.7	ENST00000355680.7.2	21.9853	61.776	9.90907	5.26825	17.168	18.6454	13.8214	12.6927	1.12997	0.517475
chr22:18078019-18078348:+	PEX26	ENST00000329627.11	ENST00000329627.11.1	3.23388	1	0.732241	2.85704	1.23318	4.78386	0.822302	2.65409	0.88265	0.262546
chr22:24548046-24555016:-	GUCD1	ENST00000435822.5	ENST00000435822.5.1	2.33632	3.80034	4.74747	5.38028	4.40674	3.05582	5.46525	5.76032	0.253409	-0.161452
chr22:24035476-24035515:+	CABIN1	ENST00000263119.9	ENST00000263119.9.1	147.897	131.902	53.2665	76.3676	30.6074	28.1212	46.2853	66.9327	1.80839	1.56247
chr22:37608501-37608630:+	GGA1	ENST00000343632.8	ENST00000343632.8.1	8.1484	131.902	19.6666	22.4234	16.5208	21.8274	21.5405	19.6721	2.26111	1.1025
chr22:38700353-38700404:-	JOSD1	ENST00000216039.9	ENST00000216039.9.2	2.61517	1	3.11628	2.53753	2.20161	4.48667	2.71843	4.69988	0.40879	-0.369132
chr22:41544136-41544262:-	POLR3H	ENST00000355209.8	ENST00000355209.8.1	34.5765	43.0757	4.07017	5.85028	6.87054	20.9596	5.57048	6.73156	1.73	1.11894
chr22:49913704-49913842:-	ALG12	ENST00000330817.10	ENST00000330817.10.1	72.3501	6.87199	12.2	7.82883	8.26828	9.15894	11.0895	8.28246	3.38775	1.52932
chr22:50343432-50372117:+	PPP6R2	ENST00000359139.7	ENST00000359139.7.1	2.85285	1.93345	4.5	7.56944	5.25714	10.3872	4.69981	6.08581	0.402052	-0.449065
chrX:24054923-24054947:+	EIF2S3	ENST00000253039.8	ENST00000253039.8.1	194.065	253.454	26.9412	30.1159	29.4194	86.334	12.7176	23.9877	2.03435	1.68999
chr1:11980455-11980482:+	MFN2	ENST00000235329.9	ENST00000235329.9.2	114.321	13.1957	178.624	154.334	110.081	130.034	94.1632	154.808	0.635036	0.0121742
chr1:26952288-26952387:-	KDF1	ENST00000320567.5	ENST00000320567.5.1	13.5912	1	13.2499	5.43833	5.64172	2.62801	3.61794	3.94113	1.21765	0.969333
chr1:28516732-28516795:+	RCC1	ENST00000373833.10	ENST00000373833.10.2	97.5325	136.577	127.874	47.6024	31.2656	72.2256	48.4643	72.2062	0.928262	1.05454
chr1:41186178-41186250:-	SCMH1	ENST00000372596.5	ENST00000372596.5.2	38.7736	24.3754	5.08333	8.92558	7.02339	4.29853	5.29204	13.0877	2.3898	1.68188
chr1:43707549-43736241:+	ST3GAL3	ENST00000347631.7	ENST00000347631.7.1	5.19707	1	1.87499	1.24071	1	1.407	1.51853	2.23837	1.90632	0.944264
chr1:50969470-50969611:+	CDKN2C	ENST00000262662.5	ENST00000262662.5.2	8.26825	5.51692	18.1818	25.0938	8.7604	10.5291	6.00365	8.41186	1.14572	0.90292
chr1:50969823-50970365:+	CDKN2C	ENST00000262662.5	ENST00000262662.5.3	8.26825	3.80034	5.1282	7.79512	6.31144	4.61243	8.0339	5.90194	0.299445	0.0331834
chr1:50968728-50968788:+	CDKN2C	ENST00000262662.5	ENST00000262662.5.4	42.9707	57.1009	13.7931	15.3568	39.116	12.8915	15.2572	8.41186	1.40796	1.04572
chr1:45660611-45660635:-	GPBP1L1	ENST00000290795.7	ENST00000290795.7.1	26.1824	24.3754	3.70175	4.93256	8.29147	5.02035	8.12737	5.05163	1.761	1.23955
chr1:68497006-68497027:-	DEPDC1	ENST00000370966.9	ENST00000370966.9.1	1.6412	2.24459	2.39007	2.83689	3.72894	10.6011	3.07168	4.97973	0.205474	-1.00026
chr1:74733207-74733324:+	TYW3	ENST00000370867.7	ENST00000370867.7.2	38.7736	1.95898	5.26562	3.81276	5.47873	9.31436	4.10251	4.2247	2.74568	1.24389
chr1:75724531-75724627:+	ACADM	ENST00000370841.8	ENST00000370841.8.1	47.1677	117.877	27.0908	81.5653	51.5948	131.407	41.9642	37.0515	0.607997	0.219775
chr1:70354487-70354559:-	ANKRD13C	ENST00000370944.8	ENST00000370944.8.1	17.7883	4.16184	5.61999	6.7638	5.90534	7.57102	5.41829	4.79478	0.923583	0.587322
chr1:77641540-77641579:-	ZZZ3	ENST00000370798.5	ENST00000370798.5.1	21.9853	1.90338	4.69444	4.61068	23.5231	4.25229	4.98547	6.91009	0.205593	-0.419322
chr1:93079495-93079522:+	MTF2	ENST00000370298.8	ENST00000370298.8.2	13.5097	23.2424	10.8437	11.1306	19.7754	75.1258	15.8706	12.1679	0.216967	-0.626745
chr1:100894689-100894770:-	EXTL2	ENST00000370114.7	ENST00000370114.7.2	4.23033	15.0252	11.5	5.65627	9.66557	7.50459	3.69882	14.1365	1.13787	0.572652
chr1:100895425-100895641:-	EXTL2	ENST00000370114.7	ENST00000370114.7.3	21.9853	2.64758	16.8666	13.5328	18.6386	19.7222	13.7467	19.3146	0.441313	-0.303377
chr1:111137545-111137566:-	DRAM2	ENST00000286692.8	ENST00000286692.8.2	21.9853	33.7255	27.2498	24.3899	38.2497	62.7715	23.1897	18.5821	0.347565	-0.152125
chr1:112619719-112619776:+	CAPZA1	ENST00000263168.3	ENST00000263168.3.2	72.3501	89.8264	126.124	65.5208	74.8034	163.665	67.718	60.6919	0.474967	0.15643
chr1:113073279-113073339:+	LRIG2	ENST00000361127.5	ENST00000361127.5.1	42.9707	103.852	59.6246	36.7418	19.1027	44.9264	12.1746	22.9725	1.26268	1.46701
chr1:117367849-117367906:+	MAN1A2	ENST00000356554.7	ENST00000356554.7.1	59.7589	9.23791	10.3333	26.0657	18.4361	42.1073	17.7817	19.3244	1.16692	0.430488
chr1:117920401-117929466:-	GDAP2	ENST00000369443.9	ENST00000369443.9.2	17.7883	33.7255	49.1247	44.3147	29.3145	15.5839	21.8963	22.1793	0.667726	0.809924
chr1:116666531-116666588:-	IGSF3	ENST00000369486.7	ENST00000369486.7.2	30.3795	15.0252	12.8276	6.36207	22.8161	34.6312	11.5214	34.5158	0.471463	-0.38503
chr1:119711901-119711946:+	PHGDH	ENST00000641597.1	ENST00000641597.1.1	1100.63	618.11	379.777	233.882	493.333	201.809	216.097	298.185	0.823546	0.970055
chr1:147611589-147611796:+	BCL9	ENST00000234739.7	ENST00000234739.7.1	8.26825	2.80677	38.6247	8.95446	11.1447	21.3502	9.06072	9.90843	1.61526	0.59454
chr1:151006571-151006697:-	FAM63A	ENST00000361936.9	ENST00000361936.9.1	9.39413	1	8.46664	7.96268	4.36994	24.3359	6.3497	11.0617	0.777191	0.0854376
chr1:151055968-151059495:-	CDC42SE1	ENST00000439374.6	ENST00000439374.6.1	2.54404	9.23791	4.31579	2.5837	5.43159	28.6762	6.42971	8.91362	0.15057	-1.19132
chr1:151165572-151165629:-	LYSMD1	ENST00000368908.9	ENST00000368908.9.1	30.3795	47.7508	13.4091	12.0958	12.6043	8.32606	15.2095	18.3989	2.02875	1.27566
chr1:154602508-154602583:-	ADAR	ENST00000368471.7	ENST00000368471.7.1	34.9549	60.3129	33.5652	43.4935	94.877	42.5467	59.0246	56.8323	0.393945	-0.358476
chr1:156601410-156601467:-	GPATCH4	ENST00000368232.8	ENST00000368232.8.1	105.927	150.602	15.3281	12.4031	10.8945	9.20817	8.28532	11.5966	6.25259	2.85787
chr1:156727994-156728312:-	ISG20L2	ENST00000313146.10	ENST00000313146.10.1	5.46775	29.0505	11.6207	13.2763	3.82057	11.1244	4.99243	4.90542	0.503505	1.18216
chr1:156727802-156727976:-	ISG20L2	ENST00000313146.10	ENST00000313146.10.2	51.3648	29.0505	22.4666	25.6015	26.9882	26.395	13.8214	21.4031	0.325026	0.542381
chr1:156727692-156727749:-	ISG20L2	ENST00000313146.10	ENST00000313146.10.3	51.3648	29.0505	15.3181	8.96186	6.04426	11.1244	12.0461	9.12611	3.04036	1.74019
chr1:160031792-160031888:-	PIGM	ENST00000368090.4	ENST00000368090.4.1	5.8455	85.1514	13.0555	30.2433	22.2404	80.6166	12.2272	27.2731	0.353362	-0.194403
chr1:161176439-161176505:-	B4GALT3	ENST00000367998.5	ENST00000367998.5.2	2.7871	2.80677	2.81176	1.37142	4.18847	2.18209	2.17366	3.05408	0.374253	-0.114699
chr1:169368247-169368280:+	BLZF1	ENST00000329281.6	ENST00000329281.6.1	51.3648	71.1261	20.7931	16.5209	35.3488	60.7125	24.5795	36.1641	0.371535	-0.0264284
chr1:178776686-178776710:+	RALGPS2	ENST00000367635.7	ENST00000367635.7.2	21.9853	33.7255	4.19298	5.87461	22.8744	39.6653	10.3576	10.5074	0.222261	-0.527357
chr1:174999604-174999652:+	CACYBP	ENST00000613570.4	ENST00000613570.4.1	30.3795	4.29516	12.1034	11.7241	40.4547	70.5976	17.4608	50.2251	0.294578	-1.20224
chr1:184477466-184477505:+	C1orf21	ENST00000235307.6	ENST00000235307.6.2	13.5912	1	7.36362	9.55963	3.91015	7.94247	7.94322	9.63866	1.25711	0.464829
chr1:203802307-203802565:+	ZC3H11A	ENST00000639812.1	ENST00000639812.1.3	38.7736	61.776	26.1363	70.3035	46.9124	10.3458	16.3267	16.1298	2.07435	1.67322
chr1:206612388-206612442:-	EIF2D	ENST00000367114.7	ENST00000367114.7.1	34.5765	29.0505	6.05555	5.46226	11.1447	13.1493	5.86016	8.7437	0.977229	0.801126
chr1:213015723-213015804:-	ANGEL2	ENST00000360506.6	ENST00000360506.6.1	38.7736	5.51692	28.0666	7.82445	16.3177	4.45854	12.4962	6.14623	0.53009	0.834431
chr1:222712779-222712845:+	BROX	ENST00000340934.9	ENST00000340934.9.2	72.3501	94.5015	34.3103	45.0662	38.5508	58.8539	64.8121	66.5486	0.579343	0.229285
chr1:220046413-220046560:-	EPRS	ENST00000366923.7	ENST00000366923.7.1	50.1453	99.8549	188.046	234.007	49.7701	157.608	138.082	276.332	0.266026	-0.055224
chr1:226871352-226871379:+	PSEN2	ENST00000366783.7	ENST00000366783.7.1	72.3501	43.0757	33.3748	20.4955	33.9562	18.9081	25.3711	25.1482	0.598722	0.709135
chr1:227317542-227317677:-	CDC42BPA	ENST00000366769.7	ENST00000366769.7.2	126.912	113.202	38.8965	19.8697	19.5234	13.6034	26.2129	31.8435	3.25734	2.08151
chr1:227317866-227317920:-	CDC42BPA	ENST00000366769.7	ENST00000366769.7.3	24.4199	113.202	75.1997	65.985	38.0914	31.0532	35.1096	61.7229	1.15949	0.906392
chr1:241848754-241848802:+	EXO1	ENST00000366548.7	ENST00000366548.7.3	122.715	136.577	35.9999	59.9507	24.1082	55.9455	35.2232	36.1201	1.5485	1.35237
chr2:3377738-3377789:-	TSSC1	ENST00000382125.8	ENST00000382125.8.1	12.3062	13.3569	33.1999	21.9235	54.7089	28.2692	18.8536	44.2724	0.599806	-0.437548
chr2:6940973-6941051:+	RNF144A	ENST00000320892.10	ENST00000320892.10.1	13.5912	5.67508	2.86666	3.78507	3.64781	3.74877	2.92665	4.42785	1.15687	0.822533
chr2:27052939-27053002:+	AGBL5	ENST00000360131.4	ENST00000360131.4.1	84.9413	5.67508	16.2727	13.0686	15.3567	15.1104	19.4958	16.3045	2.11248	0.915137
chr2:32063803-32063971:+	SPAST	ENST00000315285.8	ENST00000315285.8.1	84.9413	75.8012	35.5332	28.898	36.2771	45.7704	13.6219	20.6135	0.490629	1.00144
chr2:37317028-37317127:-	PRKD3	ENST00000379066.5	ENST00000379066.5.2	84.9413	52.4258	12.2325	15.6238	27.6297	30.3921	18.7876	23.9597	0.995732	0.609386
chr2:38665975-38666032:+	GALM	ENST00000272252.9	ENST00000272252.9.1	34.5765	29.0505	52.6246	24.6731	28.8503	55.908	40.0961	55.0445	0.388692	-0.201413
chr2:65056477-65069398:+	CEP68	ENST00000377990.6	ENST00000377990.6.1	76.5472	5.94275	20.1333	25.1373	20.4952	33.9448	24.6128	45.7962	1.41325	0.399675
chr2:69829838-69829871:+	GMCL1	ENST00000282570.3	ENST00000282570.3.1	4.23033	43.0757	14.1249	5.64179	7.34041	29.8267	7.92649	11.4393	0.553021	0.102889
chr2:69829738-69829798:+	GMCL1	ENST00000282570.3	ENST00000282570.3.2	4.23033	2.18655	1.44872	1.19696	4.49218	9.75032	1.93574	2.12016	0.264421	-0.690281
chr2:71130467-71130572:+	MPHOSPH10	ENST00000244230.6	ENST00000244230.6.1	93.3354	150.602	18.5614	27.3855	19.819	18.8356	18.337	16.4065	2.77189	1.94359
chr2:74458483-74458594:+	WBP1	ENST00000233615.6	ENST00000233615.6.1	9.39413	5.67508	1.96552	1	5.33136	6.4908	1.34147	3.56405	0.568766	0.13164
chr2:74529639-74529783:-	AUP1	ENST00000377526.3	ENST00000377526.3.1	177.277	108.527	28.8055	17.6782	58.2891	144.447	23.6238	59.6674	1.04215	0.408247
chr2:102762608-102764388:+	TMEM182	ENST00000640575.1	ENST00000640575.1.1	0.192416	5.67508	1	0.365953	0.365959	0.450246	0.557884	0.535612	5.04829	1.96402
chr2:111883960-111884068:-	ANAPC1	ENST00000341068.7	ENST00000341068.7.1	42.9707	33.7255	16.2727	9.66563	11.676	11.994	14.8276	11.7564	1.18764	1.07241
chr2:119760212-119760281:+	PTPN4	ENST00000263708.6	ENST00000263708.6.1	21.9853	5.11895	6.40908	7.02344	8.89093	17.4724	10.1944	14.5834	0.876318	-0.0454129
chr2:135531529-135531628:+	R3HDM1	ENST00000409478.5	ENST00000409478.5.1	42.9707	33.7255	8.95452	10.5107	18.4361	15.8082	9.27751	19.4207	0.757712	0.577876
chr2:152175695-152175872:-	STAM2	ENST00000263904.4	ENST00000263904.4.1	26.1824	66.4511	19.6666	21.4239	58.174	46.5844	19.4215	40.6851	0.394729	-0.227804
chr2:201129778-201129853:+	CFLAR	ENST00000309955.7	ENST00000309955.7.1	63.956	33.7255	15.3181	6.7638	14.461	8.91205	10.5038	13.1414	1.60968	1.34766
chr2:202377209-202377284:+	BMPR2	ENST00000374580.8	ENST00000374580.8.1	38.7736	71.1261	28.3636	29.5321	50.6665	32.7025	20.8167	35.7292	0.565304	0.358766
chr2:203016277-203016331:+	NBEAL1	ENST00000449802.5	ENST00000449802.5.1	47.1677	43.0757	13.6	21.4239	33.0521	17.3788	12.3476	19.4978	0.565703	0.610207
chr2:218658797-218659398:-	ZNF142	ENST00000449707.5	ENST00000449707.5.1	12.1694	10.4855	10.4648	7.62361	7.66348	10.3458	12.0919	11.8342	0.349107	0.0395287
chr2:230068580-230068676:-	SLC16A14	ENST00000295190.8	ENST00000295190.8.1	8.26825	29.0505	4.31579	9.18421	4.36994	4.07438	6.0067	5.77175	2.51808	1.50231
chr2:234952159-234995351:+	SH3BP4	ENST00000392011.6	ENST00000392011.6.2	51.3648	8.41412	17.6551	45.5612	29.7787	25.5879	27.8446	29.723	0.587708	0.0774592
chr2:240586889-240589377:+	CAPN10	ENST00000270364.11	ENST00000270364.11.1	1	1	1	1	1	1.407	1.04811	1.052	0.11319	-0.145846
chr2:241687288-241687420:+	ING5	ENST00000636051.1	ENST00000636051.1.1	21.9853	5.94275	11.1379	11.7788	7.34041	10.7681	7.67904	9.98333	0.898801	0.62697
chr3:9792726-9792798:+	ARPC4	ENST00000397261.7	ENST00000397261.7.2	63.956	122.552	99.8743	26.9969	52.7527	44.7516	47.8817	61.5889	0.87042	0.694894
chr3:12664058-12664088:-	RAF1	ENST00000251849.8	ENST00000251849.8.2	72.3501	12.5331	49.9996	7.01034	87.6272	22.6237	34.0161	21.4186	0.428146	-0.332416
chr3:10248423-10248819:+	TATDN2	ENST00000287652.8	ENST00000287652.8.2	3.68065	5.94275	3.66304	7.98065	10.1185	9.07721	7.08151	5.81097	0.386964	-0.459432
chr3:14122006-14124676:-	CHCHD4	ENST00000295767.9	ENST00000295767.9.1	13.5912	5.67508	7.04544	20.0585	10.529	18.1588	9.69495	19.7855	0.362097	-0.258482
chr3:39383449-39383491:+	SLC25A38	ENST00000273158.9	ENST00000273158.9.1	38.7736	19.7003	3.72222	36.518	7.34041	8.81028	11.025	18.0326	1.78243	1.30466
chr3:38453968-38454130:+	ACVR2B	ENST00000352511.4	ENST00000352511.4.1	1	15.0252	7.99997	3.78507	3.09662	4.18197	7.91378	4.12999	1.25888	0.546752
chr3:40525110-40525785:+	ZNF621	ENST00000339296.9	ENST00000339296.9.1	0.382385	1.90338	2.68	2.85704	1.77604	3.0193	1.56912	1.59101	0.681222	0.120821
chr3:66221015-66221072:+	SLC25A26	ENST00000354883.10	ENST00000354883.10.1	9.39413	15.0252	4.3793	7.03432	3.71614	5.03861	5.78058	6.23555	0.929456	0.886674
chr3:100400935-100401118:-	TOMM70	ENST00000284320.5	ENST00000284320.5.1	16.1316	40.542	9.91257	18.6187	45.5314	16.0656	9.31667	12.873	0.784164	0.429783
chr3:120094068-120094176:-	GSK3B	ENST00000264235.12	ENST00000264235.12.1	7.46067	38.4006	9.67999	11.2367	17.1028	26.2887	8.02301	11.1959	0.377462	0.0381293
chr3:129439765-129440011:-	MBD4	ENST00000429544.6	ENST00000429544.6.1	5.03792	8.41412	6.87999	7.25434	4.89967	9.67278	6.00524	7.24066	0.098017	0.0163699
chr3:150408669-150408696:+	TSC22D2	ENST00000361875.7	ENST00000361875.7.1	21.9853	24.3754	48.2497	29.3149	46.9124	36.4093	28.3741	42.3281	0.480058	-0.179852
chr3:156674661-156674706:+	TIPARP	ENST00000295924.11	ENST00000295924.11.1	9.04196	8.67876	42.2758	30.7351	20.0212	24.7829	33.0982	27.003	0.407986	-0.314147
chr3:183643531-183650341:+	KLHL24	ENST00000454652.6	ENST00000454652.6.1	55.5619	113.202	44.8665	87.6294	34.4204	31.7383	22.7403	33.0327	0.744022	1.29377
chr3:171460320-171460395:-	TNIK	ENST00000436636.6	ENST00000436636.6.1	14.7289	75.8012	40.1998	31.4342	23.1914	27.9021	30.9021	44.4967	0.835924	0.421993
chr3:183269702-183269780:+	B3GNT5	ENST00000326505.3	ENST00000326505.3.1	2.61517	5.67508	3.44186	5.81424	14.461	9.30158	6.51834	10.4645	0.168771	-1.09341
chr3:196503293-196503395:-	RNF168	ENST00000318037.3	ENST00000318037.3.2	7.46067	5.94275	11.1379	20.4955	9.55955	5.15718	10.2479	10.8107	0.40987	0.297326
chr3:196708680-196711953:-	CEP19	ENST00000409690.3	ENST00000409690.3.1	1	1	2.74999	1.31702	8.79645	5.33904	2.20991	1.92878	0.453195	-0.844123
chr4:15686305-15686362:+	FAM200B	ENST00000422728.2	ENST00000422728.2.1	1	5.67508	2.90909	1.63405	3.59882	4.25603	2.41287	2.26848	0.418217	-0.177365
chr4:25026924-25030859:-	LGI2	ENST00000382114.8	ENST00000382114.8.1	0.192416	1	1.87499	2.85671	3.85318	3.84902	1.12844	1.77398	0.744472	-0.159371
chr4:39976607-39977467:-	PDS5A	ENST00000303538.12	ENST00000303538.12.1	135.306	122.552	102.733	160.398	241.824	267.304	247.271	197.856	0.153325	-0.833834
chr4:56907926-56908046:+	REST	ENST00000309042.11	ENST00000309042.11.1	2.90903	23.2424	33.5861	46.3343	20.207	42.5079	21.9052	71.8777	0.507161	-0.479645
chr4:86594599-86594764:+	PTPN13	ENST00000427191.6	ENST00000427191.6.1	194.065	155.278	57.318	41.3543	34.1757	94.6108	60.9829	84.3768	2.05686	1.12923
chr4:86594355-86594451:+	PTPN13	ENST00000427191.6	ENST00000427191.6.2	20.6581	155.278	84.0663	26.14	55.8445	94.6108	54.0417	36.0513	0.541095	0.101585
chr4:103076263-103076299:-	SLC9B2	ENST00000362026.7	ENST00000362026.7.1	1	15.0252	5.13635	5.33147	5.17755	8.32606	4.1112	4.42785	0.581236	0.154187
chr4:112232017-112232161:+	AP1AR	ENST00000274000.9	ENST00000274000.9.2	17.7883	29.0505	9.86663	4.21483	8.89093	11.1751	6.82492	6.93362	0.733438	0.73419
chr4:174283857-174284253:-	FBXO8	ENST00000393674.6	ENST00000393674.6.1	13.5912	38.4006	7.99998	18.6388	8.89093	7.0473	9.98792	13.3837	1.84264	1.19712
chr5:14871634-14871766:-	ANKH	ENST00000284268.7	ENST00000284268.7.2	55.5619	5.11895	15	11.4618	32.0996	9.79607	14.7726	6.74211	0.504428	0.312924
chr5:31529078-31530812:-	DROSHA	ENST00000511367.6	ENST00000511367.6.1	194.065	314.23	184.749	232.3	143.935	156.115	80.6147	72.9828	0.658548	1.14336
chr5:31530855-31530891:-	DROSHA	ENST00000511367.6	ENST00000511367.6.2	10.9097	55.3702	50.9654	64.548	52.6743	41.6818	39.424	57.5532	0.457262	-0.0182192
chr5:52788060-52788153:+	ITGA1	ENST00000282588.6	ENST00000282588.6.1	89.1384	13.1957	11.64	13.1408	45.5606	83.6217	38.1616	23.0704	0.713586	-0.420387
chr5:65988635-65992716:+	ERBIN	ENST00000284037.9	ENST00000284037.9.1	68.1531	108.527	105.124	32.5333	36.3844	56.1943	69.2333	131.714	0.679948	0.477631
chr5:74763680-74766944:-	GFM2	ENST00000296805.7	ENST00000296805.7.1	101.73	13.6474	36.4827	26.8354	23.0981	22.5905	24.648	16.5328	1.42636	1.02
chr5:77087114-77087249:-	ZBED3	ENST00000255198.2	ENST00000255198.2.2	1.44678	5.67508	4.30555	3.2364	4.46509	0.551266	0.956113	1	3.62564	2.19836
chr5:79512921-79512990:-	HOMER1	ENST00000334082.10	ENST00000334082.10.1	17.7883	3.25846	9.86663	5.1213	9.42486	9.07721	9.69495	4.92666	0.542492	0.105532
chr5:102865829-102865907:+	PAM	ENST00000438793.7	ENST00000438793.7.1	6.86735	99.1766	92.4663	46.7353	114.722	105.137	39.0728	46.4493	0.824494	0.129559
chr5:103120412-103129364:+	PPIP5K2	ENST00000321521.13	ENST00000321521.13.1	38.7736	12.5331	5.06	8.70278	22.8161	17.1544	15.6918	16.4796	0.52775	-0.286061
chr5:116574364-116574397:-	SEMA6A	ENST00000343348.10	ENST00000343348.10.1	76.5472	38.4006	50.8746	13.5328	45.5606	33.5603	22.2599	19.4984	0.594968	0.537018
chr5:136147886-136153598:+	SMAD5	ENST00000545279.5	ENST00000545279.5.1	17.1517	18.2996	10.7176	8.24263	29.1631	28.7219	11.8665	9.53355	0.13741	-0.418391
chr5:141970807-141970828:+	RNF14	ENST00000394520.6	ENST00000394520.6.1	5.8455	38.4006	23.8666	26.5298	27.4578	33.5603	15.92	31.4023	0.472029	-0.11204
chr5:141476010-141476052:+	PCDHGC3	ENST00000617641.4	ENST00000617641.4.1	38.7736	1	8.97221	4.77393	12.6043	7.05791	7.96626	11.0296	1.14391	0.256106
chr5:173328563-173328977:-	STC2	ENST00000265087.8	ENST00000265087.8.2	63.9915	173.978	39.8407	44.4558	79.8308	35.3175	67.9355	103.954	1.8757	0.753133
chr5:173329206-173329407:-	STC2	ENST00000265087.8	ENST00000265087.8.3	24.4694	16.8092	39.8407	33.9483	79.8308	35.3175	19.6766	32.0268	0.671734	-0.0486995
chr5:181223338-181223509:+	TRIM41	ENST00000315073.9	ENST00000315073.9.1	7.46067	10.8855	4.08	11.7788	2.95685	6.49612	3.02555	3.73703	0.708516	1.1209
chr6:16328341-16328431:-	ATXN1	ENST00000244769.8	ENST00000244769.8.1	30.3795	5.11895	3.41379	2.62487	4.36994	3.56552	4.27013	3.58123	2.59639	1.31034
chr6:24720243-24720330:-	C6orf62	ENST00000378119.8	ENST00000378119.8.3	9.39413	10.3502	0.78125	0.868025	2.1374	4.66303	0.330518	0.588592	1.08264	1.38587
chr6:28281798-28281843:+	PGBD1	ENST00000259883.3	ENST00000259883.3.1	21.9853	71.1261	27.2498	27.4582	29.587	46.2991	21.8689	18.0326	0.32121	0.335728
chr6:37354078-37354141:+	RNF8	ENST00000373479.8	ENST00000373479.8.1	93.3354	103.852	10.6026	12.565	28.5808	40.2642	12.3837	17.9634	1.10083	0.887637
chr6:37697463-37697913:-	MDGA1	ENST00000434837.7	ENST00000434837.7.1	5.03792	1.31115	3.86363	3.53619	10.1936	4.40716	4.48191	3.63458	0.272759	-0.606744
chr6:43171590-43171626:+	SRF	ENST00000265354.5	ENST00000265354.5.1	26.1824	52.4258	6.37209	3.59979	35.6509	29.1404	9.48497	8.94535	0.532777	-0.148913
chr6:82247567-82247627:-	IBTK	ENST00000306270.11	ENST00000306270.11.1	4.77513	13.1957	16.5965	15.5366	11.8866	22.3722	22.5624	42.016	0.148184	-0.931736
chr6:98926881-98934770:-	FBXL4	ENST00000369244.6	ENST00000369244.6.1	4.23033	4.61353	1.71654	1.47705	1.79387	0.926548	1.22298	1.45057	1.54516	1.28678
chr6:105161968-105161992:-	POPDC3	ENST00000254765.3	ENST00000254765.3.1	1	1	1	0.682977	2.85669	7.17715	1.88423	0.628532	0.351705	-0.924996
chr6:105133518-105137168:-	BVES	ENST00000314641.9	ENST00000314641.9.1	1.38181	5.51692	4.0625	4.54528	3.71507	6.24035	3.77123	4.81239	0.267641	-0.287294
chr6:109094387-109094471:-	SESN1	ENST00000436639.6	ENST00000436639.6.1	55.5619	52.4258	49.1247	12.4128	106.685	68.5626	21.294	40.9259	0.786744	-0.0381121
chr6:125781179-125781245:+	NCOA7	ENST00000368357.7	ENST00000368357.7.1	59.7589	85.1514	24.9302	10.0337	54.7089	68.2623	13.0363	15.0303	0.447554	0.298555
chr6:132814551-132814759:+	RPS12	ENST00000230050.3	ENST00000230050.3.1	2.28241	2.72616	2.09854	2.11781	1.83066	4.32906	3.85539	4.41685	0.305876	-0.463798
chr7:519355-519397:-	PDGFA	ENST00000402802.7	ENST00000402802.7.2	13.5912	19.7003	10.6249	4.46518	17.4592	6.29104	10.1944	14.8724	1.08301	0.39298
chr7:30284931-30285066:+	ZNRF2	ENST00000323037.4	ENST00000323037.4.1	5.19707	1.82379	1.21212	2.55209	1.62756	9.54707	3.50215	2.7182	1.20247	0.223175
chr7:45109218-45111669:-	TBRG4	ENST00000395655.8	ENST00000395655.8.1	19.8373	183.328	16.6154	12.8778	24.398	31.0532	16.9697	13.738	2.16324	1.1099
chr7:50674628-50674655:-	GRB10	ENST00000335866.7	ENST00000335866.7.1	17.1517	11.7093	23.5555	7.46679	29.5318	20.0712	15.6921	15.2304	0.412907	-0.342118
chr7:98106981-98107083:+	LMTK2	ENST00000297293.5	ENST00000297293.5.1	89.1384	7.32368	13.74	22.6641	15.9487	39.6653	25.9347	34.2435	2.22831	0.800194
chr7:100612768-100612915:+	MOSPD3	ENST00000223054.8	ENST00000223054.8.1	1	1	2.74999	1.95107	1.48142	1.44873	1.45529	1.46439	0.504293	0.197637
chr7:103029417-103074770:-	FBXL13	ENST00000379305.7	ENST00000379305.7.1	0.192416	1	0.533335	1	1	1.81401	0.410512	0.763597	0.483243	-0.254776
chr7:150325942-150325969:+	LRRC61	ENST00000359623.8	ENST00000359623.8.1	13.5912	1	8.46664	4.36997	13.0685	8.32606	11.0213	9.97817	0.345748	-0.75739
chr7:151080762-151080789:-	FASTK	ENST00000482571.2	ENST00000482571.2.1	47.1677	29.0505	9.27271	6.07237	22.8161	20.2178	20.7043	7.31495	0.614563	0.257665
chr7:151082585-151083545:-	TMUB1	ENST00000297533.8	ENST00000297533.8.1	2.7871	3.47137	3.94	9.87665	6.87054	3.01017	3.70319	3.94116	0.763273	0.358634
chr7:156892999-156893047:-	LMBR1	ENST00000353442.9	ENST00000353442.9.1	34.5765	61.776	58.7496	21.6065	90.226	65.7135	26.6886	20.5983	0.660923	0.193313
chr8:17923003-17923036:+	PCM1	ENST00000325083.12	ENST00000325083.12.1	29.2654	211.378	27.6491	77.7196	236.626	171.534	91.9286	96.9798	0.434718	-0.702441
chr8:28502707-28502737:+	FZD3	ENST00000240093.7	ENST00000240093.7.1	4.23033	38.4006	11.5	10.5107	19.1027	19.5133	10.4473	8.12304	0.623354	0.196629
chr8:41598860-41598998:+	AGPAT6	ENST00000396987.7	ENST00000396987.7.2	51.3648	15.0252	14.5333	20.0585	41.7148	8.62848	7.71558	10.9289	0.260031	0.742366
chr8:42049150-42049237:-	KAT6A	ENST00000406337.5	ENST00000406337.5.2	21.1896	27.3613	53.4999	29.5196	122.278	56.3525	42.5589	45.0892	0.39454	-0.637895
chr8:42049007-42049085:-	KAT6A	ENST00000406337.5	ENST00000406337.5.3	11.7226	155.278	27.3721	36.6254	65.52	31.0652	29.5114	69.863	1.94713	0.728815
chr8:38457459-38457492:-	FGFR1	ENST00000397091.9	ENST00000397091.9.1	34.5765	47.7508	7.36362	12.1403	15.4426	6.43929	7.87978	14.6997	2.69182	1.51285
chr8:69832821-69832989:-	SLCO5A1	ENST00000260126.8	ENST00000260126.8.1	5.19707	15.0252	2.39999	3.85321	1.46417	1.57854	2.0316	3.2421	3.40685	1.94839
chr8:78516310-78516457:+	PKIA	ENST00000396418.6	ENST00000396418.6.1	9.39413	5.67508	5.66665	5.17761	13.5327	13.3543	4.97905	4.35116	0.317387	-0.214582
chr8:81713961-81714875:-	ZFAND1	ENST00000523361.5	ENST00000523361.5.1	0.553225	0.688852	0.614173	0.759899	0.242176	0.377463	0.648113	0.765597	0.566317	0.596824
chr8:118111228-118111342:-	EXT1	ENST00000378204.6	ENST00000378204.6.2	47.1677	38.4006	15.9333	10.5107	4.31111	7.57102	9.80808	8.53798	3.89164	2.23791
chr8:118111551-118111599:-	EXT1	ENST00000378204.6	ENST00000378204.6.3	47.1677	38.4006	6.63888	4.06585	30.4533	8.74356	5.34661	9.90843	1.49876	0.924627
chr8:123256014-123256089:-	ZHX1	ENST00000395571.7	ENST00000395571.7.1	26.1824	38.4006	10.5454	11.7788	18.1191	19.8025	19.1268	18.1393	0.574198	0.196888
chr8:126558093-126558195:-	FAM84B	ENST00000304916.3	ENST00000304916.3.1	38.7736	29.0505	20.1333	6.82033	19.1027	8.81028	6.14016	8.5052	1.03193	1.23388
chr8:125083951-125084014:-	WASHC5	ENST00000318410.11	ENST00000318410.11.1	47.1677	47.7508	11.8889	20.6554	47.4172	21.9076	18.338	36.6031	0.645688	0.133237
chr8:144497082-144497316:+	PPP1R16A	ENST00000292539.8	ENST00000292539.8.2	1	5.67508	3.54545	2.90214	2.5851	1.44873	1.8485	2.70875	1.325	0.866613
chr9:22009006-22009084:-	CDKN2B	ENST00000276925.6	ENST00000276925.6.1	1	1.45169	4.11111	2.31418	1.91224	2.3376	4.19605	4.56414	0.191	-0.604521
chr9:32552341-32552386:+	RP11-205M20.3	ENST00000451672.2	ENST00000451672.2.1	0.106449	1	0.140352	0.682977	0.301127	1	0.325295	1.1182	0.249639	-0.739525
chr9:20622328-20622508:-	MLLT3	ENST00000380338.8	ENST00000380338.8.1	3.29084	22.4186	12.9123	8.42834	13.3002	9.99219	9.95089	12.0418	0.746971	0.166252
chr9:34126411-34126504:-	DCAF12	ENST00000361264.8	ENST00000361264.8.1	110.124	18.2996	21.0232	10.2971	9.78579	12.0931	8.36184	9.86276	4.17478	2.029
chr9:34336279-34338812:+	NUDT2	ENST00000379158.6	ENST00000379158.6.1	0.618194	2.80677	1.38043	3.33005	3.09662	5.03153	2.55557	2.49354	0.416226	-0.603235
chr9:35605548-35605593:+	TESK1	ENST00000336395.5	ENST00000336395.5.1	9.39413	6.76654	4.73332	3.78507	2.53752	8.73306	2.07693	6.17964	1.25513	0.881353
chr9:35748784-35748958:-	GBA2	ENST00000378103.7	ENST00000378103.7.1	8.26825	8.41412	11.7333	22.6573	7.01199	14.462	9.53675	15.6933	0.320015	0.148952
chr9:86947059-86947134:-	GAS1	ENST00000298743.8	ENST00000298743.8.1	5.19707	10.3502	9.74994	12.2618	10.2834	7.6532	8.94058	14.0042	0.310141	-0.0649599
chr9:83980860-83999720:+	RMI1	ENST00000325875.7	ENST00000325875.7.1	59.7589	14.1807	27.409	16.3269	24.1425	15.0712	16.6691	18.4958	0.645125	0.57124
chr9:79572190-79572214:+	TLE4	ENST00000376552.6	ENST00000376552.6.1	110.124	145.927	43.4665	65.5208	102.354	74.2606	33.4961	64.9181	0.378016	0.418979
chr9:96776068-96777620:-	ZNF510	ENST00000375231.5	ENST00000375231.5.2	5.24702	15.8282	6.90624	7.99208	8.42676	10.8722	8.70659	6.2969	0.339282	0.0499592
chr9:98119090-98119192:-	TRIM14	ENST00000375098.7	ENST00000375098.7.1	13.5912	10.3502	2.30232	5.1213	3.32812	5.03861	7.03683	3.43012	1.36013	0.992431
chr9:122264695-122264866:+	MRRF	ENST00000344641.7	ENST00000344641.7.1	42.9707	61.776	42.9997	27.4582	18.6386	36.0039	18.3899	22.4281	0.460138	0.922918
chr9:128322700-128322745:+	COQ4	ENST00000300452.7	ENST00000300452.7.2	5.46775	11.7093	8.36841	5.62856	23.1914	13.5646	10.4008	13.3936	0.262047	-0.783496
chr9:130714089-130714203:+	ABL1	ENST00000372348.6	ENST00000372348.6.1	72.3501	57.1009	66.6245	67.7046	80.697	53.5034	28.0808	80.8186	0.628677	0.37132
chr9:130444942-130452317:+	ASS1	ENST00000352480.9	ENST00000352480.9.1	7.48496	33.7255	9.8584	6.24715	4.30499	5.39804	5.12838	4.98009	2.01073	1.48067
chr9:136944025-136944091:-	FBXW5	ENST00000325285.7	ENST00000325285.7.1	76.5472	38.4006	5.11764	4.14789	5.80417	5.84195	4.86021	4.75048	5.03541	2.4388
chr9:134026524-134026620:+	RP11-374P20.5	ENST00000603928.2	ENST00000603928.2.2	1.80758	1	2.74999	1.92836	2.73254	0.551266	1.69138	1.1182	0.463777	0.542484
chr9:137301965-137302118:-	NRARP	ENST00000356628.3	ENST00000356628.3.1	5.19707	4.29516	2.39999	1.95107	4.16789	5.48734	3.74045	2.55355	0.230525	-0.219536
chr10:6089166-6097053:+	RBM17	ENST00000379888.8	ENST00000379888.8.1	59.7589	85.1514	76.2495	48.3462	80.697	45.3634	30.1388	53.1663	0.729357	0.598583
chr10:5685114-5712857:+	FAM208B	ENST00000328090.9	ENST00000328090.9.1	6.61054	12.8236	17.663	15.3679	15.5959	14.545	11.9847	16.0576	0.372458	-0.098363
chr10:21497042-21497138:-	CASC10	ENST00000377113.5	ENST00000377113.5.1	13.5912	1	2.86666	1.48142	1	2.3727	1.12844	0.912741	5.27716	2.18397
chr10:15860286-15860352:-	FAM188A	ENST00000277632.7	ENST00000277632.7.1	13.9213	75.8012	18.3055	16.7946	12.6406	51.7899	10.2772	12.5692	0.245427	0.506474
chr10:30437365-30438964:+	MAP3K8	ENST00000263056.5	ENST00000263056.5.1	5.19707	5.67508	4.26665	9.66294	0.68298	4.43175	2.6717	2.79702	2.5217	1.80133
chr10:28532786-28532897:+	WAC	ENST00000375664.8	ENST00000375664.8.2	97.5325	99.1766	31.8636	36.1896	59.3317	61.4574	21.9052	29.525	0.165797	0.569961
chr10:50460756-50460792:-	SGMS1	ENST00000361781.6	ENST00000361781.6.2	21.9853	38.4006	16.3999	33.0529	18.3254	5.33904	11.6108	7.65954	2.44663	1.81965
chr10:68572292-68572514:+	TET1	ENST00000373644.4	ENST00000373644.4.1	10.691	38.4006	19.6666	17.7104	20.3382	8.2962	13.2021	8.95863	1.52055	1.10784
chr10:88880150-88901656:+	STAMBPL1	ENST00000371927.7	ENST00000371927.7.1	1	4.29516	1.84	2.16547	3.09662	5.03153	2.12451	5.39766	0.250475	-0.710844
chr10:86521696-86521741:-	WAPL	ENST00000298767.9	ENST00000298767.9.2	21.5517	272.154	11.4136	10.291	52.9913	30.6796	16.4122	22.0487	3.61635	1.38401
chr10:87863708-87863846:+	PTEN	ENST00000371953.7	ENST00000371953.7.1	9.39413	19.7003	1.78873	2.16407	1.81243	5.26297	2.01556	2.26001	1.84225	1.42913
chr10:97619662-97633484:-	MORN4	ENST00000478953.1	ENST00000478953.1.1	0.073577	1	0.83721	0.580674	1.63404	0.633497	0.517238	0.470902	0.637815	0.161983
chr10:96129898-96132617:+	ZNF518A	ENST00000316045.9	ENST00000316045.9.1	6.55854	85.1514	16.9535	8.48887	14.2391	6.58611	10.6291	12.6641	5.22241	1.96854
chr10:114938227-114938296:+	TRUB1	ENST00000298746.4	ENST00000298746.4.1	13.9213	85.1514	17.24	17.0651	11.9144	45.7704	24.3646	29.8716	0.503564	0.106923
chr10:118046277-118046391:-	RAB11FIP2	ENST00000355624.7	ENST00000355624.7.1	1	24.3754	4.4186	2.7461	9.18415	10.8352	7.64245	6.36291	0.830212	-0.247987
chr10:121593864-121593897:-	FGFR2	ENST00000358487.9	ENST00000358487.9.1	42.9707	66.4511	38.6247	44.3147	19.7042	43.5537	36.662	42.6171	0.465082	0.536024
chr10:133302945-133302966:-	TUBGCP2	ENST00000252936.7	ENST00000252936.7.1	24.4199	94.5015	38.6551	63.6641	58.7705	19.504	76.0124	124.99	1.89154	0.650453
chr11:208065-208119:+	RIC8A	ENST00000526104.5	ENST00000526104.5.3	80.7443	85.1514	49.5331	52.988	67.703	62.7715	48.2255	54.869	0.152225	0.183323
chr11:2402314-2402338:+	TSSC4	ENST00000380996.9	ENST00000380996.9.2	34.5765	47.7508	17.5454	19.5671	32.1858	20.2178	20.2246	12.3437	0.576228	0.557979
chr11:9265172-9265274:-	DENND5A	ENST00000328194.7	ENST00000328194.7.1	42.9707	5.94275	19.6666	16.7821	33.9183	38.7493	8.44688	9.80917	0.794542	0.448735
chr11:10751054-10751171:+	CTR9	ENST00000361367.6	ENST00000361367.6.1	164.686	304.88	97.4088	72.3961	103.582	239.163	114.04	183.058	0.449147	0.0406549
chr11:36296378-36401125:+	PRR5L	ENST00000530639.5	ENST00000530639.5.1	1.80758	3.47137	0.78125	2.25798	1.86627	2.15708	1.51377	1.87259	0.395691	0.104251
chr11:45805654-45805735:+	SLC35C1	ENST00000314134.3	ENST00000314134.3.3	1.80758	1	11.4999	9.66294	2.5851	8.54985	4.28405	7.9505	0.952042	0.237546
chr11:57673055-57673163:+	ZDHHC5	ENST00000287169.7	ENST00000287169.7.1	13.1138	9.23791	16.2069	35.8134	10.2251	24.1416	12.0986	9.42749	1.26932	0.766288
chr11:57667926-57668016:+	ZDHHC5	ENST00000287169.7	ENST00000287169.7.2	7.25485	52.4258	31.3332	66.8383	23.1914	18.725	14.1517	12.6873	1.76984	1.40529
chr11:57672203-57672269:+	ZDHHC5	ENST00000287169.7	ENST00000287169.7.3	68.1531	9.23791	31.3332	35.8134	23.1914	11.1918	17.0441	21.6853	0.753207	0.858778
chr11:61333295-61333316:+	TKFC	ENST00000394900.7	ENST00000394900.7.1	9.39413	15.0252	36.8747	25.2562	58.174	28.454	31.5085	39.564	0.361174	-0.679106
chr11:61362196-61362280:-	CYB561A3	ENST00000294072.8	ENST00000294072.8.2	9.39413	15.0252	8.9333	4.48726	4.10416	2.83251	5.90519	6.35367	1.73878	1.29462
chr11:63813414-63813462:+	C11orf84	ENST00000294244.8	ENST00000294244.8.1	47.1677	38.4006	37.7497	37.3843	84.1621	49.7309	35.5689	40.473	0.185936	-0.269857
chr11:65613870-65613930:-	MAP3K11	ENST00000309100.7	ENST00000309100.7.1	21.9853	24.3754	17.6249	3.21916	11.3953	14.727	8.92488	7.9505	0.638898	0.576327
chr11:65640884-65640986:+	SIPA1	ENST00000534313.5	ENST00000534313.5.1	30.3795	33.7255	3.76744	7.97451	13.5327	8.52101	8.22123	11.3713	1.40138	0.880169
chr11:67505210-67505324:-	PITPNM1	ENST00000436757.6	ENST00000436757.6.1	13.5912	10.3502	5.19998	12.2618	5.64172	18.1588	9.81507	18.9368	0.79208	0.0553141
chr11:73876792-73876840:-	CHCHD8	ENST00000355693.4	ENST00000355693.4.1	59.7589	29.0505	73.6245	41.3835	33.9562	18.725	29.129	46.7866	0.58609	0.749181
chr11:102348659-102348692:+	BIRC2	ENST00000227758.6	ENST00000227758.6.1	3.42275	19.7003	29.8748	39.1169	37.3834	31.9323	29.7937	36.2009	0.391645	-0.51882
chr11:118365058-118365079:+	UBE4A	ENST00000252108.7	ENST00000252108.7.1	14.4033	9.54315	29.98	26.2993	56.1615	20.9896	23.66	24.5077	0.418914	-0.390555
chr12:389167-389197:-	KDM5A	ENST00000399788.6	ENST00000399788.6.1	315.78	389.031	55.6388	62.6955	35.9218	76.2101	58.0288	50.6505	3.20344	2.00828
chr12:753222-753300:+	WNK1	ENST00000535572.5	ENST00000535572.5.2	143.7	113.202	76.5997	53.6259	125.589	74.1173	102.303	123.62	0.411481	-0.0536083
chr12:7936124-7936205:-	SLC2A3	ENST00000075120.11	ENST00000075120.11.1	5.8455	47.7508	13.0909	7.00907	7.49918	5.95588	11.316	14.5387	3.13172	1.38348
chr12:12343381-12350113:-	MANSC1	ENST00000535902.5	ENST00000535902.5.1	21.9853	24.3754	11.1818	8.46207	15.9	21.8274	26.7024	20.9729	0.429758	-0.268081
chr12:42325982-42326024:-	ZCRB1	ENST00000266529.7	ENST00000266529.7.1	1.89355	33.7255	5.8611	4.85139	14.2391	32.7463	6.88092	27.7394	0.398738	-0.869352
chr12:49106993-49110569:-	LMBR1L	ENST00000267102.12	ENST00000267102.12.1	5.03792	5.94275	3.08772	7.0178	2.1037	1.96011	4.3378	3.15826	0.850996	1.06359
chr12:49348067-49348772:+	DNAJC22	ENST00000549441.6	ENST00000549441.6.1	1	5.67508	10.6249	5.33147	2.85669	5.1181	2.12411	4.40551	1.81147	0.939439
chr12:49806032-49828372:-	NCKAP5L	ENST00000335999.6	ENST00000335999.6.1	63.956	5.96861	19.8275	10.2618	53.8426	14.3064	15.0003	16.583	0.378219	-0.173948
chr12:50057628-50057655:+	ASIC1	ENST00000228468.8	ENST00000228468.8.1	3.42275	5.67508	2.16666	2.46238	10.147	4.35256	6.24029	7.74151	0.420001	-0.794329
chr12:54017295-54053923:+	HOXC4	ENST00000303406.4	ENST00000303406.4.1	0.407064	0.457342	0.393189	0.390631	0.387042	0.915713	0.754972	0.55904	0.221269	-0.529739
chr12:55729434-55729596:-	CD63	ENST00000549117.5	ENST00000549117.5.1	33.3033	304.88	60.6943	105.301	231.694	467.032	130.471	135.893	0.238068	-0.973827
chr12:57395760-57395793:-	R3HDM2	ENST00000347140.7	ENST00000347140.7.1	5.03792	29.0505	18.4999	14.4612	30.4533	29.1404	12.4077	20.4135	0.479785	-0.250786
chr12:64409961-64410027:+	XPOT	ENST00000332707.9	ENST00000332707.9.1	7.25485	8.41412	9.47368	6.47348	12.6013	8.86707	11.1132	12.2239	0.178081	-0.460623
chr12:69739456-69739555:+	RAB3IP	ENST00000550536.5	ENST00000550536.5.1	26.1824	47.7508	14.9999	27.8551	37.3834	46.9855	25.0388	42.0391	0.160992	-0.425496
chr12:71686619-71686643:+	TMEM19	ENST00000266673.9	ENST00000266673.9.2	26.1824	5.67508	12.2	11.2119	34.8846	67.576	35.6878	21.6499	0.243826	-1.23935
chr12:68808380-68808425:+	MDM2	ENST00000258149.9	ENST00000258149.9.2	74.4901	111.388	368.497	86.212	327.585	461.541	83.9795	119.497	1.73966	0.479782
chr12:98644740-98644896:-	IKBIP	ENST00000342502.6	ENST00000342502.6.1	34.5765	38.4006	27.1332	13.0469	54.7089	35.1883	26.7024	27.7394	0.259055	-0.317529
chr12:111406242-111418149:+	SH2B3	ENST00000341259.6	ENST00000341259.6.1	9.39413	5.67508	7.12496	2.58512	1.31702	3.7454	2.47372	4.13893	2.49681	1.60323
chr12:110614105-110614186:+	TCTN1	ENST00000551590.5	ENST00000551590.5.1	34.5765	19.7003	8.9655	19.5671	20.9723	57.9671	9.99607	26.7369	0.474998	-0.145097
chr12:111842023-111842197:+	MAPKAPK5	ENST00000550735.6	ENST00000550735.6.2	8.26825	33.7255	2.1831	5.46226	8.46202	7.36393	4.99243	5.90338	1.65885	0.790665
chr12:113186291-113186750:+	RITA1	ENST00000548278.1	ENST00000548278.1.2	17.7883	10.3502	1.72414	1.72214	3.21914	7.8635	2.01988	1.64205	1.93515	1.12835
chr12:113185914-113185989:+	RITA1	ENST00000548278.1	ENST00000548278.1.3	17.7883	10.3502	3.33332	3.32089	4.71338	3.31416	3.21058	3.16714	1.22439	1.16732
chr12:123230456-123230486:-	MPHOSPH9	ENST00000606320.5	ENST00000606320.5.1	76.5472	131.902	15.3889	24.3491	37.6696	26.1291	11.2127	10.3174	1.39979	1.43464
chr12:124011953-124012040:+	ZNF664	ENST00000539644.5	ENST00000539644.5.2	2.61517	19.7003	2.67605	3.76228	4.24988	3.46698	2.58932	2.61453	2.03574	1.13259
chr12:123972553-123972616:-	CCDC92	ENST00000238156.7	ENST00000238156.7.1	1	1	1	1	1	1.81401	0.486227	1	0.553508	0.204115
chr12:133080976-133081272:+	ZNF140	ENST00000355557.6	ENST00000355557.6.1	9.07584	33.7255	24.7999	15.4427	10.2834	28.454	9.73413	8.29378	0.642655	0.695442
chr13:26221270-26221330:-	RNF6	ENST00000381588.8	ENST00000381588.8.1	84.9413	9.23791	15.1944	12.182	20.9723	20.0582	18.1682	15.7993	1.4622	0.613082
chr13:36283698-36297719:-	CCDC169-SOHLH2	ENST00000511166.1	ENST00000511166.1.1	1	1	2.39999	1	0.365959	0.71073	0.852628	1.54944	0.914755	0.925954
chr13:67229884-67229983:-	PCDH9	ENST00000544246.5	ENST00000544246.5.1	4.39688	85.1514	32.2665	65.972	59.9065	40.122	13.5206	11.9074	1.95476	1.33951
chr13:102799339-102799420:+	BIVM	ENST00000257336.5	ENST00000257336.5.2	47.1677	29.0505	3.93023	12.1403	4.85136	8.17975	5.29204	3.64845	3.29999	2.11639
chr14:24114993-24115098:+	DCAF11	ENST00000446197.7	ENST00000446197.7.1	5.03792	61.776	35.1248	48.6462	33.9183	29.1404	13.7159	10.6557	1.56933	1.23183
chr14:35121925-35121988:-	PPP2R3C	ENST00000261475.9	ENST00000261475.9.1	2.54404	2.35507	6.44444	7.66196	2.70337	5.65265	6.92711	8.15525	0.225348	-0.30957
chr14:39103157-39103214:-	SEC23A	ENST00000307712.10	ENST00000307712.10.1	89.1384	117.877	29.2413	97.1586	180.318	271.422	76.4355	109.517	0.198867	-0.863581
chr14:49852736-49852997:-	NEMF	ENST00000298310.9	ENST00000298310.9.1	9.04196	20.771	43.6363	15.3482	36.1893	23.7974	20.77	19.2405	0.676711	0.00766485
chr14:44962384-44962525:+	TOGARAM1	ENST00000361577.7	ENST00000361577.7.1	21.9853	33.7255	11.2666	34.7855	13.5327	17.6871	7.2224	9.03772	0.940841	1.16032
chr14:50668006-50668138:-	SAV1	ENST00000324679.4	ENST00000324679.4.2	1	2.64758	9.86663	4.4922	6.07233	7.05791	3.65925	5.89562	1.00281	-0.000681388
chr14:55027412-55043015:+	SOCS4	ENST00000395472.2	ENST00000395472.2.2	4.23033	9.23791	6.87999	10.3125	5.06215	7.30282	5.63583	4.03357	0.649497	0.555349
chr14:70907577-70907754:+	PCNX1	ENST00000304743.6	ENST00000304743.6.1	23.6123	11.7093	23.2727	28.8507	8.47436	29.6377	8.1089	27.3153	1.07734	0.82937
chr14:73892090-73892123:+	ZNF410	ENST00000555044.5	ENST00000555044.5.1	34.5765	12.5331	6.46875	16.887	13.5169	8.37564	9.84985	19.9005	0.742697	0.475005
chr14:74692087-74692183:-	AREL1	ENST00000356357.8	ENST00000356357.8.1	17.7883	5.94275	12.3749	4.36997	17.4592	12.5708	9.40021	13.8202	0.404457	-0.356493
chr14:80916495-80939464:-	C14orf145	ENST00000555265.5	ENST00000555265.5.1	17.7883	10.3502	11.1818	12.3135	7.01776	6.86405	8.70659	18.0326	0.668023	0.587308
chr14:104795514-104795553:-	AKT1	ENST00000349310.7	ENST00000349310.7.1	76.5472	4.29516	38.6247	29.5877	29.8489	44.5494	29.4428	63.7147	0.948747	0.14963
chr15:43777413-43777482:+	SERF2	ENST00000381359.5	ENST00000381359.5.2	114.321	94.5015	46.7332	33.3364	91.9778	140.329	40.4967	75.1473	0.331617	-0.186903
chr15:45522419-45522467:-	SLC30A4	ENST00000261867.4	ENST00000261867.4.1	9.39413	5.67508	2.5909	3.78507	7.06391	14.0407	1.88423	6.49115	0.434334	-0.11551
chr15:50424463-50424493:+	USP8	ENST00000396444.7	ENST00000396444.7.2	51.3648	103.852	84.9994	20.0131	55.5752	91.5982	19.9142	30.5504	1.46647	0.803512
chr15:58771325-58771373:+	FAM63B	ENST00000559228.5	ENST00000559228.5.1	3.42275	19.7003	7.04544	6.07237	21.4236	29.1404	6.26617	18.9368	0.37048	-0.810434
chr15:77690870-77734999:-	LINGO1	ENST00000570216.5	ENST00000570216.5.1	1	1	0.363638	0.535821	0.535828	0.592997	0.735837	0.816854	0.606682	0.233508
chr15:81001888-81001969:+	MESDC1	ENST00000267984.3	ENST00000267984.3.4	21.9853	5.67508	6.13331	1.31702	3.85318	5.1181	1.6788	2.44461	2.06977	1.46031
chr15:84982065-84982116:+	PDE8A	ENST00000310298.8	ENST00000310298.8.1	26.1824	38.4006	14.5333	14.4612	26.1219	46.2991	16.8812	27.6809	0.174999	-0.315154
chr15:89333820-89333892:-	POLG	ENST00000268124.9	ENST00000268124.9.1	135.306	12.5331	19.6666	34.2874	39.6765	44.9564	25.4042	21.5932	1.19104	0.597186
chr16:3443766-3476227:+	NAA60	ENST00000407558.8	ENST00000407558.8.1	7.70163	4.29516	3.88235	5.78273	4.43374	3.22933	3.67352	3.24373	0.299678	0.56235
chr16:19114390-19114510:+	ITPRIPL2	ENST00000381440.4	ENST00000381440.4.1	5.19707	1	7.36362	3.40712	5.5735	3.68205	4.75323	3.9754	0.452552	-0.147888
chr16:31073942-31074008:-	ZNF668	ENST00000300849.4	ENST00000300849.4.1	26.1824	33.7255	26.3748	16.7821	19.1917	13.3543	10.6123	10.3405	0.514284	0.999632
chr16:31109046-31109106:+	BCKDK	ENST00000394951.5	ENST00000394951.5.1	5.03792	10.0617	4.74648	6.15063	18.5719	29.6377	11.1206	4.89352	0.398323	-0.801841
chr16:50749576-50749672:+	CYLD	ENST00000427738.7	ENST00000427738.7.2	30.3795	43.0757	24.7999	5.04692	16.851	12.6153	10.14	23.1037	1.16286	0.978483
chr16:57735794-57736988:+	KATNB1	ENST00000379661.7	ENST00000379661.7.1	80.7443	52.4258	14.6111	65.972	11.5465	19.5133	25.4042	24.2311	2.33238	1.69793
chr16:67571148-67571187:+	CTCF	ENST00000264010.9	ENST00000264010.9.1	20.382	16.3575	22.6562	29.6539	28.9375	31.9777	22.5309	44.8914	0.179432	-0.472924
chr16:71454158-71456796:-	ZNF23	ENST00000357254.8	ENST00000357254.8.1	9.39413	10.3502	3.89655	4.85139	2.90212	2.73562	2.66976	2.22163	0.903189	1.41463
chr16:89490470-89490536:-	ANKRD11	ENST00000301030.9	ENST00000301030.9.2	28.4578	192.678	10.7905	12.9531	23.2606	33.2523	15.0774	22.3687	2.15899	1.0553
chr17:3690956-3696054:-	P2RX5	ENST00000552276.5	ENST00000552276.5.1	1	1	2.27272	1.96285	4.24921	1.30974	2.66976	1.61665	0.349899	-0.384452
chr17:7405578-7405605:+	NLGN2	ENST00000575301.5	ENST00000575301.5.1	5.8455	29.0505	7.06664	5.17761	10.2834	16.0997	6.30539	13.1383	0.550426	-0.0410975
chr17:7466736-7484023:-	ZBTB4	ENST00000311403.4	ENST00000311403.4.1	4.23033	2.35507	19.1999	8.56644	6.53634	4.81424	5.26497	6.05196	1.26043	0.631944
chr17:16215472-16215526:-	NCOR1	ENST00000268712.7	ENST00000268712.7.1	131.109	117.877	75.1997	29.3256	128.647	140.602	82.433	56.8688	0.187824	-0.283917
chr17:16567766-16567805:-	ZNF287	ENST00000395825.3	ENST00000395825.3.1	63.956	33.7255	21.9998	23.5236	13.9941	24.3359	14.2081	12.5603	1.29702	1.22917
chr17:17681719-17681779:+	RAI1	ENST00000353383.5	ENST00000353383.5.1	135.306	99.1766	99.8743	24.3491	40.6275	79.2439	52.6805	53.0136	1.05266	0.79433
chr17:19282952-19282997:+	EPN2	ENST00000314728.9	ENST00000314728.9.2	17.7883	47.7508	35.1248	12.1403	15.2659	7.0473	15.5898	15.059	2.38451	1.45946
chr17:19977722-19977800:-	AKAP10	ENST00000225737.10	ENST00000225737.10.1	12.3062	131.902	20.7272	23.5087	14.9489	39.6653	32.3444	25.1283	1.09863	0.517267
chr17:29451486-29451507:+	TAOK1	ENST00000261716.7	ENST00000261716.7.1	164.686	164.628	43.4827	33.9819	83.6227	113.333	47.4399	35.7162	0.429489	0.403272
chr17:40100119-40100311:-	NR1D1	ENST00000246672.3	ENST00000246672.3.1	17.7883	5.67508	5.27777	9.2426	7.96259	6.29104	4.98174	6.57266	0.514653	0.485868
chr17:40122308-40122479:+	MSL1	ENST00000398532.8	ENST00000398532.8.1	34.5765	47.7508	10.5278	54.7102	17.1276	50.4172	7.92021	23.1037	0.558457	0.736199
chr17:56978109-56978229:+	SCPEP1	ENST00000262288.7	ENST00000262288.7.1	38.7736	38.4006	18.1379	19.7044	15.6238	46.5844	23.606	34.3775	0.767678	0.216476
chr17:57085380-57105446:+	AKAP1	ENST00000337714.7	ENST00000337714.7.1	30.073	17.4758	77.9997	31.089	51.1306	43.5226	48.3064	70.7788	0.497845	-0.394211
chr17:58417122-58417215:-	RNF43	ENST00000407977.6	ENST00000407977.6.1	21.9853	10.3502	6.24996	4.48726	4.71338	5.07003	2.54132	6.67754	1.43455	1.29825
chr17:63826928-63827159:-	FTSJ3	ENST00000427159.6	ENST00000427159.6.1	311.583	54.5464	124.454	317.197	205.44	99.9302	108.434	70.9031	1.51399	0.941842
chr17:67239480-67243813:-	HELZ	ENST00000358691.9	ENST00000358691.9.1	513.042	473.183	95.4998	124.639	120.292	121.88	69.6193	123.867	1.45442	1.39579
chr17:68248064-68248157:+	AMZ2	ENST00000359904.7	ENST00000359904.7.3	8.26825	47.7508	19.1999	18.1746	65.1041	20.2956	12.7093	10.8068	0.809112	0.503923
chr17:76550879-76550948:-	CYGB	ENST00000589145.1	ENST00000589145.1.1	1	1	0.222223	1	1	0.592997	0.410512	0.816854	0.412514	0.154419
chr17:81239272-81239374:+	C17orf89	ENST00000431388.2	ENST00000431388.2.1	2.61517	1.82379	2.26	8.79665	2.48095	2.64926	2.22435	2.68175	1.03204	0.594246
chr18:11689339-11689366:+	GNAL	ENST00000334049.10	ENST00000334049.10.1	21.9853	15.0252	25.4998	19.1922	6.68701	23.6496	13.7905	11.9905	0.94929	0.882211
chr18:32092046-32092082:+	RNF138	ENST00000261593.7	ENST00000261593.7.2	42.9707	61.776	24.3332	17.8022	61.6391	73.0668	25.6576	40.3051	0.190519	-0.447781
chr18:48950147-48950594:-	SMAD7	ENST00000262158.6	ENST00000262158.6.1	17.7883	2.64758	2.79487	2.20104	2.81707	5.26297	3.21054	2.72326	2.42331	1.08683
chr18:51046933-51047023:+	SMAD4	ENST00000398417.6	ENST00000398417.6.1	40.5716	262.804	38.24	41.1013	43.2464	22.03	22.2801	37.0203	4.63122	1.97215
chr18:61816563-61892840:-	RNF152	ENST00000312828.3	ENST00000312828.3.1	1	1	0.805556	1.32497	3.16639	1	2.2263	3.00763	0.275253	-0.917167
chr19:1021083-1021110:-	TMEM259	ENST00000356663.7	ENST00000356663.7.1	156.291	12.2923	22.5833	104.955	46.3339	102.58	29.3071	41.5915	1.30751	0.762783
chr19:6361456-6361534:+	CLPP	ENST00000245816.9	ENST00000245816.9.1	72.3501	80.4763	53.7331	17.7361	24.4821	31.0532	30.3786	39.7185	0.963706	0.956448
chr19:11356879-11356963:+	PLPPR2	ENST00000251473.9	ENST00000251473.9.1	5.19707	5.67508	2.39999	4.46518	10.529	3.84902	2.76846	4.47978	0.350771	-0.0620306
chr19:17245469-17245544:-	NR2F6	ENST00000291442.3	ENST00000291442.3.1	21.9853	38.4006	7.6818	9.35522	15.5829	19.3152	8.11741	12.4656	0.476999	0.349305
chr19:18155599-18155623:+	PIK3R2	ENST00000222254.12	ENST00000222254.12.2	30.3795	5.11895	14.0666	5.81424	51.2438	22.1642	10.0727	14.2243	0.445567	-0.605455
chr19:18155816-18155849:+	PIK3R2	ENST00000222254.12	ENST00000222254.12.3	30.3795	29.0505	26.3748	11.2119	11.4765	37.3766	10.9274	13.2406	0.863482	0.740874
chr19:18419576-18419612:+	SSBP4	ENST00000348495.10	ENST00000348495.10.1	9.39413	5.67508	7.12496	3.59888	13.9941	11.2953	10.5099	15.4504	0.180654	-0.940239
chr19:34772938-34773073:-	ZNF599	ENST00000329285.12	ENST00000329285.12.1	2.7871	1	2.47368	2.2999	3.11232	1.81401	1.70759	3.63458	0.350984	-0.181069
chr19:35248565-35248868:+	LSR	ENST00000602122.5	ENST00000602122.5.1	156.291	136.577	41.6388	27.8103	40.9756	38.5666	40.4977	58.8528	1.47999	1.14671
chr19:36689412-36689439:+	ZNF567	ENST00000536254.6	ENST00000536254.6.1	13.1138	13.3569	46.7332	31.1172	66.8367	33.1533	22.0742	51.8654	0.75724	-0.270494
chr19:36525202-36525301:-	ZNF260	ENST00000523638.5	ENST00000523638.5.1	63.956	61.776	7.23437	6.08678	11.0885	6.71007	7.74759	6.61663	3.4982	2.07278
chr19:36607613-36610665:+	ZNF382	ENST00000292928.6	ENST00000292928.6.1	11.4986	43.0757	11.6944	6.57113	6.77705	11.1244	7.14646	7.31495	1.11133	1.01856
chr19:37324921-37357996:+	HKR1	ENST00000591471.5	ENST00000591471.5.1	1.12317	2.38621	1.80186	1.854	1.98909	2.92023	1.3713	1.79702	0.275673	-0.101797
chr19:36235728-36235818:+	ZNF146	ENST00000443387.2	ENST00000443387.2.3	13.5097	18.2996	31.1	30.4322	23.3639	18.2134	13.943	19.0923	0.622423	0.434943
chr19:36115209-36115323:+	TBCB	ENST00000221855.7	ENST00000221855.7.1	194.065	188.003	83.5516	58.6213	241.906	139.271	194.24	168.017	0.395166	-0.448513
chr19:40799195-40800370:+	EGLN2	ENST00000303961.8	ENST00000303961.8.2	72.3501	10.0617	4.74747	4.84742	10.2251	9.67278	4.68694	4.83981	2.62301	1.34062
chr19:40751110-40751140:+	SNRPA	ENST00000243563.7	ENST00000243563.7.1	269.612	47.1323	119.045	120.518	117.043	66.9639	82.3125	63.6774	0.592999	0.665907
chr19:42220296-42224285:+	ZNF526	ENST00000301215.7	ENST00000301215.7.1	22.8048	10.8855	14.0278	4.85583	10.3877	6.49754	5.78762	7.66126	0.689645	0.792492
chr19:43924248-43924408:-	ZNF45	ENST00000269973.9	ENST00000269973.9.2	84.9413	61.776	20.7931	30.4832	49.5112	23.3852	23.9883	24.6259	0.664496	0.691963
chr19:44025436-44027063:+	ZNF222	ENST00000187879.12	ENST00000187879.12.1	84.9413	52.4258	42.1247	10.2618	6.23827	9.09955	13.7467	9.74693	4.7721	2.55426
chr19:45901688-45901811:-	MYPOP	ENST00000322217.5	ENST00000322217.5.1	1	10.3502	8.87494	2.16407	3.59882	2.22101	1.8991	3.94113	2.12876	1.34487
chr19:48753004-48753347:-	FUT1	ENST00000310160.7	ENST00000310160.7.1	13.5912	1	7.36362	3.91017	3.78503	3.05905	4.27013	3.67684	1.21078	0.745362
chr19:48753453-48753492:-	FUT1	ENST00000310160.7	ENST00000310160.7.2	13.5912	1	20.2499	3.91017	7.06391	3.05905	5.36707	5.15543	1.3341	0.76179
chr19:48645935-48646025:-	CA11	ENST00000084798.8	ENST00000084798.8.1	2.34033	1.90338	1.41176	3.85321	3.32812	2.53719	2.68676	5.25357	0.0897105	-0.56049
chr19:46746068-46748085:+	FKRP	ENST00000318584.9	ENST00000318584.9.1	4.08808	24.3754	9.3611	17.7104	7.59634	10.5459	14.853	9.69235	0.762717	0.407906
chr19:46755412-46755433:+	FKRP	ENST00000318584.9	ENST00000318584.9.2	55.5619	24.3754	42.1247	33.0529	18.1744	25.0223	21.0604	23.8933	0.784951	0.890415
chr19:49876982-49877072:-	AKT1S1	ENST00000391835.1	ENST00000391835.1.3	38.7736	61.776	23.2727	22.5576	41.383	9.85077	18.2453	25.524	2.27357	1.22766
chr19:51974356-51974386:-	ZNF350	ENST00000243644.8	ENST00000243644.8.1	59.7589	10.8855	14.0454	9.90634	8.89093	9.14007	6.89488	14.5834	2.39602	1.40989
chr19:52025741-52025813:-	ZNF614	ENST00000356322.10	ENST00000356322.10.2	2.61517	1.82379	2.75	1.32771	3.53616	1.61948	1.47909	2.2841	0.49344	0.106428
chr19:49813142-49813163:-	FUZ	ENST00000313777.8	ENST00000313777.8.1	9.88342	9.23791	24.5454	17.6091	10.3877	18.0669	22.7784	10.5074	0.416027	0.0759516
chr19:50020614-50025399:-	VRK3	ENST00000599538.5	ENST00000599538.5.1	15.5365	6.87199	11.193	13.2634	38.598	25.5879	11.4336	10.676	0.401393	-0.467733
chr19:55280063-55280253:-	HSPBP1	ENST00000255631.9	ENST00000255631.9.1	126.912	75.8012	45.8965	41.4396	26.0273	110.13	27.0343	33.6415	1.62889	1.08643
chr19:55648946-55649054:+	CCDC106	ENST00000592996.5	ENST00000592996.5.1	1	1.82379	9.74994	2.95685	8.42676	1.89747	4.47451	7.8557	0.794339	-0.137953
chr19:57819912-57856116:+	CTD-2583A14.10	ENST00000596498.2	ENST00000596498.2.1	0.017998	0.0296511	0.0316208	0.0273837	0.0714588	0.0885328	0.0508445	0.0623892	0.138178	-1.27963
chr19:57819912-57839032:+	ZNF587B	ENST00000594328.1	ENST00000594328.1.1	0.106449	15.0252	3.52777	2.96214	0.512542	3.44202	2.27275	4.11349	1.60561	0.775101
chr19:58129468-58154871:-	ZNF329	ENST00000601887.1	ENST00000601887.1.1	0.192416	1	0.507043	0.588624	0.277869	0.479824	0.239811	0.484539	0.60192	0.610162
chr19:58229567-58230432:+	ZNF544	ENST00000595981.5	ENST00000595981.5.1	1.80758	5.11895	2.82	2.17615	3.85318	2.57057	1.52921	2.45666	0.639514	0.375842
chr20:349248-349290:+	NRSN2	ENST00000608467.5	ENST00000608467.5.1	0.192416	1	2.55555	2.46238	25.2556	14.0407	3.7815	6.17964	0.268422	-1.79447
chr20:24992684-24992834:-	APMAP	ENST00000217456.2	ENST00000217456.2.1	10.3823	150.602	21.1403	27.1604	109.152	238.477	34.4812	28.5551	0.30676	-0.804091
chr20:37519330-37527808:-	BLCAP	ENST00000373537.6	ENST00000373537.6.1	1	1	1.97674	0.805989	3.32812	7.91906	1.67634	3.32743	0.418773	-1.1139
chr20:50115855-50115936:-	UBE2V1	ENST00000371677.7	ENST00000371677.7.1	6.65309	4.29516	13.1333	14.9254	13.3638	12.9251	9.17532	9.56227	0.545602	-0.065526
chr21:15730120-15730153:+	USP25	ENST00000285681.6	ENST00000285681.6.1	21.9853	71.1261	12.7727	20.9597	13.7576	60.0261	29.0008	60.2466	0.52064	-0.163555
chr21:33324990-33325029:+	IFNAR1	ENST00000270139.7	ENST00000270139.7.1	4.23033	1.90338	10.1389	10.1471	20.6553	41.7003	21.0371	16.2704	0.226676	-1.56058
chr21:29024631-29027897:+	USP16	ENST00000399976.6	ENST00000399976.6.1	25.2275	5.41129	11.2212	8.92802	12.1071	11.8161	7.77799	9.05336	0.597683	0.313391
chr21:31276877-31339289:-	TIAM1	ENST00000286827.7	ENST00000286827.7.1	47.1677	33.7255	24.3332	44.3147	42.7755	46.5844	38.6133	34.2812	0.27087	-0.0932982
chr21:39313580-39313616:-	BRWD1	ENST00000333229.6	ENST00000333229.6.1	139.503	122.552	30.4482	61.3432	59.0216	120.425	24.9209	42.0143	0.513918	0.600058
chr21:42010291-42010345:-	ZBTB21	ENST00000310826.9	ENST00000310826.9.1	34.9185	136.577	87.333	72.3302	37.2055	38.4443	30.4135	79.3211	1.16855	1.04868
chr21:42502330-42518408:+	SLC37A1	ENST00000398341.7	ENST00000398341.7.1	5.19707	5.67508	7.12496	2.39254	3.88852	8.54985	2.02441	3.81497	1.17909	0.619869
chr21:46323278-46323362:-	C21orf58	ENST00000291691.11	ENST00000291691.11.2	26.1824	4.29516	3.89655	4.36997	0.580676	2.44635	2.69699	4.17121	18.9128	3.62462
chr22:20982294-20982444:+	LZTR1	ENST00000215739.12	ENST00000215739.12.1	84.9413	43.0757	17.8965	20.0162	22.5574	16.4813	12.4547	16.2302	1.0153	1.17782
chr22:19432177-19432288:+	MRPL40	ENST00000333130.3	ENST00000333130.3.1	122.715	122.552	42.9998	102.356	160.394	100.716	104.816	127.874	0.285853	-0.325278
chr22:21945945-21946059:-	PPM1F	ENST00000263212.9	ENST00000263212.9.1	26.1824	8.41412	6.83332	4.91371	4.27472	7.45026	6.08037	6.25999	2.21805	1.19583
chr22:27801182-27801218:-	MN1	ENST00000302326.4	ENST00000302326.4.1	5.19707	15.0252	11.7333	4.80428	15.7266	7.17715	10.1944	15.7978	0.732696	-0.0443101
chr22:31754870-31754903:+	DEPDC5	ENST00000642696.1	ENST00000642696.1.1	42.9707	66.4511	22.8748	5.57353	8.42676	22.9632	4.07323	9.66858	1.9963	1.82634
chr22:37566186-37566228:+	CDC42EP1	ENST00000249014.4	ENST00000249014.4.1	4.23033	24.3754	4.82812	3.59979	9.90628	11.703	7.45604	9.15001	0.696877	-0.171841
chr22:41833136-41833163:+	SREBF2	ENST00000361204.8	ENST00000361204.8.2	36.5337	178.653	149.749	69.6984	124.934	230.927	107.571	203.884	0.441249	-0.51457
chrX:10158460-10158490:+	CLCN4	ENST00000380833.8	ENST00000380833.8.1	5.19707	5.67508	5.19998	7.96268	13.9941	5.80445	6.18534	7.34664	0.272109	-0.289106
chrX:13689127-13703850:+	RAB9A	ENST00000464506.1	ENST00000464506.1.2	7.17615	33.1278	5.37154	7.86696	5.5095	11.2052	6.50237	6.90919	0.826516	0.637767
chrX:24024878-24024899:-	KLHL15	ENST00000328046.8	ENST00000328046.8.1	315.78	230.079	83.0907	150.466	80.1937	271.422	91.3391	170.41	1.32416	0.71766
chrX:55146232-55161176:-	FAM104B	ENST00000358460.8	ENST00000358460.8.1	1	1	1	1	1.19796	1.0466	1.11966	1	0.0625397	-0.118981
chrX:47145446-47147425:+	RBM10	ENST00000377604.7	ENST00000377604.7.1	36.5337	41.3658	19.7174	16.29	27.3662	16.8282	16.1956	16.6166	0.569006	0.582775
chrX:47218339-47218372:+	CDK16	ENST00000457458.6	ENST00000457458.6.2	72.0674	295.53	121.4	34.7973	25.3117	20.5105	22.2321	26.4084	5.07103	2.58701
chrX:70133722-70133848:+	IGBP1	ENST00000342206.10	ENST00000342206.10.1	9.88342	80.4763	24.8636	6.59471	31.1712	25.8272	12.9564	16.0958	1.15766	0.526508
chrX:68829156-68829222:+	EFNB1	ENST00000204961.4	ENST00000204961.4.1	68.1531	43.0757	14.2758	7.98694	60.8783	16.257	17.2063	11.0719	0.775661	0.411489
chrX:80809619-80809643:-	BRWD3	ENST00000373275.4	ENST00000373275.4.1	51.3648	47.7508	12.7727	13.6809	23.5084	43.3283	18.6846	18.1245	0.600662	0.240449
chrX:119565223-119565355:-	CXorf56	ENST00000320339.8	ENST00000320339.8.1	2.61517	5.67508	5.34482	4.88022	2.68497	1.87283	4.67603	6.39415	0.906433	0.563274
chrX:129841979-129842060:-	ZDHHC9	ENST00000357166.10	ENST00000357166.10.1	4.23033	3.71015	5.70312	4.63416	22.2404	5.33492	4.69602	5.88403	0.364116	-0.470081
chrX:134796810-134796933:-	FAM122B	ENST00000370790.5	ENST00000370790.5.1	5.8455	29.0505	9.20688	3.59988	2.84765	4.21105	2.81296	3.98563	2.24999	1.71453
chrX:153971557-153971590:-	HCFC1	ENST00000310441.11	ENST00000310441.11.2	59.9536	244.104	33.9359	24.3398	103.825	193.106	106.79	105.734	0.405557	-0.743278
chr1:67685114-67685381:+	GADD45A	ENST00000370986.8	ENST00000370986.8.1	6.34528	11.579	3.91864	5.5095	10.0992	6.16401	6.20465	9.63304	0.549525	-0.108468
chr10:100987566-100987617:+	TWNK	ENST00000370228.2	ENST00000370228.2.2	19.5744	3.71015	35.0665	36.7418	12.6043	22.2769	24.3347	18.4883	0.678287	0.363968
chr13:29553791-29595679:-	SLC7A1	ENST00000380752.9	ENST00000380752.9.1	8.69445	43.0133	14.0044	12.448	27.8102	14.2273	15.5711	22.4162	1.07445	0.260213
chr1:38859473-38859800:-	RRAGC	ENST00000373001.3	ENST00000373001.3.1	42.9707	29.0505	6.25	7.66196	5.53744	7.98403	6.74926	6.37594	2.73945	1.7577
chr5:135033972-135034029:-	PITX1	ENST00000265340.11	ENST00000265340.11.1	38.7736	19.7003	4.86206	10.7478	4.82331	15.6521	10.7888	14.4673	3.14031	1.39108
chr5:150778569-150795434:+	SMIM3	ENST00000526627.1	ENST00000526627.1.1	1	5.67508	1.63636	3.59888	3.21914	0.775633	1.22765	1.95136	2.7214	1.43357
chr7:157139041-157139263:+	UBE3C	ENST00000348165.9	ENST00000348165.9.1	6.6627	6.56206	4.19118	3.4748	6.00945	9.15585	3.59051	7.09249	0.279873	-0.199823
chr10:77637644-77637725:-	KCNMA1	ENST00000639913.1	ENST00000639913.1.1	1	1	3.62498	2.73259	4.46509	1.68635	2.32081	1.86702	0.568419	-0.0579521
chr14:103057231-103057387:-	CDC42BPB	ENST00000361246.6	ENST00000361246.6.1	13.1138	7.59033	9.13952	9.34248	7.15765	14.0057	7.33407	17.1695	0.539425	0.058103
chr16:83807952-83808090:+	HSBP1	ENST00000433866.6	ENST00000433866.6.1	1.14047	2.24759	2.08621	2.71923	1.37117	4.65272	2.07037	3.54614	0.188817	-0.37273
chr17:4940111-4940141:+	RNF167	ENST00000571816.5	ENST00000571816.5.1	114.321	150.602	132.249	48.8705	127.476	149.252	89.2303	83.0496	0.32109	-0.00853232
chr1:227318173-227318266:-	CDC42BPA	ENST00000366769.7	ENST00000366769.7.4	7.13459	10.9372	22.56	9.38044	14.735	17.9187	42.2854	36.9547	0.132918	-1.08779
chr2:74958632-74958818:+	POLE4	ENST00000483063.1	ENST00000483063.1.1	9.39413	10.3502	3.94	5.0921	6.52453	5.20771	2.6673	3.27384	0.219076	0.691494
chr3:57756321-57756583:+	SLMAP	ENST00000295951.7	ENST00000295951.7.2	2.61517	6.76654	12.6666	9.8194	12.0957	20.0918	11.4235	26.7841	0.351934	-0.979645
chr4:54064502-54064532:-	CHIC2	ENST00000263921.7	ENST00000263921.7.2	13.5912	29.0505	18.4999	22.6573	27.8544	18.1588	23.2578	23.8316	0.406003	-0.061189
chr5:160415296-160419053:-	SLU7	ENST00000297151.8	ENST00000297151.8.1	31.3807	412.407	56.0175	75.64	76.1959	74.5924	81.7007	57.6825	2.07217	0.988704
chr7:23246715-23246832:+	GPNMB	ENST00000258733.8	ENST00000258733.8.1	5.19707	1	5.37497	2.73259	9.66272	5.1181	4.23096	4.36314	0.38874	-0.604987
chr7:101321466-101321709:-	IFT22	ENST00000517481.5	ENST00000517481.5.1	2.34033	24.3754	6.31033	18.3259	15.3893	10.5459	13.4448	15.1842	0.830386	0.049523
chr8:89984613-89984649:-	NBN	ENST00000265433.7	ENST00000265433.7.1	42.9707	57.1009	29.9332	67.7046	67.703	75.8122	61.6703	56.7785	0.263629	-0.383787
chr9:93451735-93451780:+	FAM120A	ENST00000277165.10	ENST00000277165.10.1	72.3501	113.202	92.8743	77.2339	152.598	130.72	95.4511	105.943	0.186607	-0.394919
chr10:91923922-91924042:+	BTAF1	ENST00000265990.10	ENST00000265990.10.1	10.3823	178.653	71.9331	27.9676	130.075	77.9236	34.909	56.1074	0.958797	0.302037
chr10:118754789-118755218:-	CACUL1	ENST00000369151.7	ENST00000369151.7.1	5.8455	1.45169	1.59434	2.43442	6.19956	2.6601	2.59282	3.69205	0.151115	-0.53382
chr11:126268739-126268958:-	SRPRA	ENST00000332118.10	ENST00000332118.10.1	72.3501	85.1514	32.862	24.2356	18.4718	30.6867	29.3071	16.9839	1.11698	1.20788
chr12:123973623-123973992:+	ZNF664	ENST00000539644.5	ENST00000539644.5.3	13.5912	3.47137	6.55171	5.57353	5.3929	10.4471	6.60006	7.24414	0.823968	0.206188
chr13:72782191-72782233:+	PIBF1	ENST00000326291.10	ENST00000326291.10.1	21.9853	47.7508	30.3999	14.4799	42.5811	33.1533	35.6053	21.375	0.349168	-0.197665
chr14:52730245-52730341:+	STYX	ENST00000354586.4	ENST00000354586.4.1	21.9853	29.0505	5.5862	7.97451	7.97445	8.73306	7.67904	5.20437	1.0175	1.0606
chr17:42017385-42017481:-	DNAJC7	ENST00000457167.8	ENST00000457167.8.1	56.7233	22.4692	29.3134	25.9612	20.4995	33.1444	27.1553	45.3879	0.882496	0.349489
chr18:8609719-8609902:+	RAB12	ENST00000329286.6	ENST00000329286.6.1	21.9853	33.7255	5.23943	15.266	11.3991	9.12854	6.53711	10.3816	1.07127	0.980974
chr19:48165573-48170328:-	LIG1	ENST00000263274.11	ENST00000263274.11.1	349.356	56.194	36.1093	29.5592	105.617	59.8237	42.4148	50.0884	1.09622	0.508069
chr22:23095422-23095476:+	GNAZ	ENST00000615612.1	ENST00000615612.1.1	13.5912	5.67508	6.24996	2.73259	19.1917	14.727	11.8307	9.74417	0.160549	-1.07229
chrX:153972573-153982066:+	TMEM187	ENST00000369982.4	ENST00000369982.4.1	1	2.35507	2.39999	2.39254	1.92834	3.0193	7.47784	3.60044	0.171539	-0.808409
chr1:1087506-1092020:-	C1orf159	ENST00000421241.6	ENST00000421241.6.1	5.19707	1	1.08235	3.21916	0.910349	1.28689	1.31025	1.38398	2.00405	1.26874
chr1:15210513-15215025:+	TMEM51	ENST00000376014.7	ENST00000376014.7.1	17.7883	3.47137	7.99997	8.89104	5.12126	9.2362	9.71737	17.1844	1.26664	0.37571
chr1:27558733-27558883:-	AHDC1	ENST00000247087.10	ENST00000247087.10.1	2.34033	24.3754	11.2666	20.0585	20.058	7.91906	12.359	11.9888	1.09177	0.530935
chr1:27914631-27914715:-	RPA2	ENST00000373912.7	ENST00000373912.7.1	21.1896	113.202	47.4544	31.71	65.6722	101.123	62.8963	34.2318	0.2943	-0.357102
chr1:37689876-37690398:-	C1orf109	ENST00000358011.8	ENST00000358011.8.1	1.94378	12.5331	5.30769	7.86751	9.14842	17.8275	5.68783	5.04943	0.483827	-0.231602
chr1:45012157-45012229:+	UROD	ENST00000246337.8	ENST00000246337.8.1	189.868	178.653	190.874	114.26	196.778	191.119	211.372	196.08	0.153772	-0.240673
chr1:52552946-52553096:-	ZCCHC11	ENST00000371544.7	ENST00000371544.7.1	14.7289	9.08986	30.2727	8.5307	15.2009	19.5522	49.2236	30.5809	0.253165	-0.781025
chr1:89579591-89579654:+	LRRC8B	ENST00000640258.1	ENST00000640258.1.1	3.42275	29.0505	2.57746	1.30408	7.03424	3.74929	1.50386	1.78351	2.9677	1.41683
chr1:108885308-108885374:+	GPSM2	ENST00000406462.6	ENST00000406462.6.2	30.3795	38.4006	25.7332	46.0473	43.4473	22.1167	41.6811	67.7608	0.46469	-0.0998813
chr1:113073269-113073425:+	LRIG2	ENST00000361127.5	ENST00000361127.5.2	42.9707	103.852	59.6246	19.0534	19.1027	44.9264	10.7888	13.7344	1.57738	1.5204
chr1:117367787-117367895:+	MAN1A2	ENST00000356554.7	ENST00000356554.7.2	59.7589	9.23791	16.909	26.0657	13.9984	29.927	17.7817	17.7735	1.51175	0.806354
chr1:149936676-149936790:-	MTMR11	ENST00000439741.3	ENST00000439741.3.1	9.39413	5.67508	1.87499	4.46518	2.73254	2.3727	2.43598	1.57802	0.988984	1.23711
chr1:154974745-154974829:+	CKS1B	ENST00000368439.5	ENST00000368439.5.1	1	0.176209	0.533335	1	1.86627	1	1	0.633707	0.524371	-0.502573
chr1:154983875-154983896:+	FLAD1	ENST00000315144.14	ENST00000315144.14.1	72.3501	94.5015	23.8666	29.3149	68.5692	60.7125	28.6551	38.545	0.31126	0.0721433
chr1:153967922-153968048:+	CREB3L4	ENST00000368607.7	ENST00000368607.7.1	13.5912	1	15.8749	7.34047	4.80424	9.95407	4.24219	10.8652	1.49817	0.877195
chr1:157045224-157045353:-	ARHGEF11	ENST00000368194.7	ENST00000368194.7.1	47.1677	52.4258	27.1332	24.6731	23.1914	33.5603	13.7488	23.2219	0.388786	0.729439
chr1:156738552-156741189:-	MRPL24	ENST00000434558.5	ENST00000434558.5.1	3.40452	3.10975	3.58461	2.99231	3.24213	3.66067	3.47756	3.20444	0.08043	-0.0498397
chr1:169367714-169367780:-	NME7	ENST00000367811.7	ENST00000367811.7.1	13.5912	4.29516	9.68964	10.8692	7.98436	7.45026	12.4042	11.0422	0.424297	0.0158668
chr1:173825082-173825142:+	DARS2	ENST00000361951.4	ENST00000361951.4.1	177.277	169.303	126.066	27.7633	46.3984	29.6561	23.7361	32.1218	1.90278	1.97316
chr1:179955103-179990520:+	CEP350	ENST00000367607.7	ENST00000367607.7.2	122.715	34.7754	133.999	24.2356	16.7612	24.1997	17.7055	33.2406	3.1919	2.09218
chr1:180632119-180632269:+	XPR1	ENST00000367590.8	ENST00000367590.8.1	30.3795	61.776	8.65115	31.1716	13.3489	37.1587	22.9638	18.0875	0.696334	0.594164
chr1:185311280-185316985:-	IVNS1ABP	ENST00000367498.7	ENST00000367498.7.1	16.3441	5.66723	10.3333	6.8729	22.9046	14.9467	12.0764	5.64655	0.300591	-0.337529
chr1:204213902-204214037:-	GOLT1A	ENST00000308302.3	ENST00000308302.3.1	1	1	1	1	1	0.592997	0.735837	1.57802	0.393334	0.226217
chr1:223292641-223364073:-	SUSD4	ENST00000494793.6	ENST00000494793.6.1	5.19707	1	1.93333	2.39254	1.95106	5.1181	2.38276	2.26848	0.911379	0.240365
chr1:222579849-222588563:-	TAF1A	ENST00000366890.5	ENST00000366890.5.1	1.70784	1.31115	1.24852	1.30588	1.3679	1.48883	2.13514	1.52234	0.236007	-0.163381
chr1:246566183-246566222:-	TFB2M	ENST00000366514.4	ENST00000366514.4.1	26.1824	38.4006	30.7498	31.3203	30.4533	24.3359	17.1139	23.8316	0.34916	0.47215
chr2:9418665-9418710:-	ITGB1BP1	ENST00000360635.7	ENST00000360635.7.1	42.9707	29.0505	26.3748	20.9248	11.7787	17.1991	14.4819	17.8728	0.936167	1.05818
chr2:10303006-10303060:+	HPCAL1	ENST00000307845.7	ENST00000307845.7.1	21.9853	10.3502	4.73332	4.46518	9.3551	16.7861	13.4156	12.8831	0.834813	-0.125756
chr2:25982383-25982422:-	KIF3C	ENST00000264712.7	ENST00000264712.7.1	21.9853	5.67508	6.24996	3.59888	5.5735	16.0997	10.774	15.4504	1.54488	0.353364
chr2:27086785-27086863:+	KHK	ENST00000260599.10	ENST00000260599.10.1	2.61517	3.47137	18.4999	23.5236	13.9968	12.8031	22.8988	16.7506	0.487543	-0.583041
chr2:27661295-27662199:-	SUPT7L	ENST00000337768.9	ENST00000337768.9.1	5.48297	5.60308	7.50442	10.5377	5.94907	7.4221	10.6394	9.30594	0.167007	-0.186773
chr2:46542735-46542987:+	RHOQ	ENST00000238738.8	ENST00000238738.8.1	9.39413	0.176209	1	2.85671	0.75929	2.44635	3.08963	1.82741	5.1059	1.84109
chr2:47170751-47176541:-	CALM2	ENST00000272298.11	ENST00000272298.11.1	8.55027	13.4459	30.5774	27.6072	22.3357	28.074	36.6365	39.0672	0.179057	-0.735146
chr2:63841113-63841158:+	UGP2	ENST00000394417.6	ENST00000394417.6.1	22.8048	29.0089	69.0907	57.808	163.859	132.869	39.6915	60.7725	0.647523	-0.391468
chr2:55617350-55617419:-	PPP4R3B	ENST00000611717.4	ENST00000611717.4.1	55.5619	5.96861	23.909	16.1649	14.1614	29.5872	29.8997	39.3372	1.51038	0.415699
chr2:86623121-86623169:-	RNF103	ENST00000237455.4	ENST00000237455.4.1	7.46067	43.0757	65.7495	15.6834	71.1681	34.4307	35.5689	27.4267	0.662411	-0.083043
chr2:105855056-105881487:+	NCK2	ENST00000233154.8	ENST00000233154.8.1	1.44678	15.0252	1.19718	2.67416	2.11425	1.48983	2.39113	2.6017	4.05206	1.62036
chr2:105816434-105816530:+	NCK2	ENST00000233154.8	ENST00000233154.8.2	13.5912	15.0252	3.86363	23.5236	29.587	13.6171	11.9055	11.52	0.678923	-0.0257323
chr2:120223292-120223388:-	TMEM185B	ENST00000426077.2	ENST00000426077.2.1	21.9853	5.11895	22.4666	23.7448	36.7413	40.8863	27.3796	46.5145	0.251136	-0.961127
chr2:121605925-121606051:-	CLASP1	ENST00000409078.7	ENST00000409078.7.1	15.7436	13.6474	15.9872	35.34	54.8935	39.7178	33.8035	29.331	0.368691	-0.793217
chr2:127526329-127526437:-	IWS1	ENST00000295321.8	ENST00000295321.8.1	32.4958	314.23	85.9543	135.148	60.5998	97.8668	67.9069	59.8904	1.00996	0.861832
chr2:157818422-157874894:-	ACVR1	ENST00000263640.7	ENST00000263640.7.1	6.65309	38.4006	15.2414	14.315	19.5669	38.4443	14.545	14.8622	0.288783	-0.255865
chr2:156435522-156435606:+	GPD2	ENST00000310454.10	ENST00000310454.10.1	47.1677	33.7255	66.6245	64.2395	72.9006	107.384	76.7482	102.153	0.197379	-0.702499
chr2:165295815-165297026:+	SCN2A	ENST00000636071.2	ENST00000636071.2.1	1	5.67508	1.87499	1.86629	1	1.407	1	1	1.12009	1.13336
chr2:173965178-173965412:-	SP3	ENST00000310015.10	ENST00000310015.10.1	16.3441	113.202	28.0344	41.896	18.8735	47.6683	31.7597	30.4063	0.612581	0.459783
chr2:202911713-202911788:-	WDR12	ENST00000261015.4	ENST00000261015.4.2	17.9593	23.2424	84.9994	103.223	30.4829	26.1055	29.0005	38.3517	1.04463	0.828208
chr2:203016182-203016209:+	NBEAL1	ENST00000449802.5	ENST00000449802.5.2	47.1677	43.0757	25.4998	39.9832	33.0521	31.5253	30.0787	30.7678	0.228179	0.304729
chr2:216371335-216371599:-	MARCH4	ENST00000273067.4	ENST00000273067.4.1	1	1	1	1	1	1	1	0.77579	0.125144	0.100644
chr2:219279388-219279817:+	DNAJB2	ENST00000336576.9	ENST00000336576.9.1	21.9853	6.76654	14.0666	5.46226	8.42676	5.26297	14.4723	7.17972	0.718738	0.492477
chr3:9428830-9428911:+	SETD5	ENST00000406341.5	ENST00000406341.5.1	13.0629	145.927	31.1724	33.2554	17.6332	37.7372	19.0624	21.0485	1.15895	0.967717
chr3:12557068-12568928:+	MKRN2	ENST00000170447.11	ENST00000170447.11.1	13.0629	89.8264	6.93939	16.7946	25.5525	8.87695	8.80272	11.2207	3.99427	1.69102
chr3:9950136-9952384:-	PRRT3	ENST00000412055.5	ENST00000412055.5.1	2.23523	33.7255	17.6249	15.727	6.70637	5.48734	6.87671	8.58501	2.13586	1.44284
chr3:15099105-15099132:-	RBSN	ENST00000253699.7	ENST00000253699.7.2	55.5619	43.0757	8.97673	8.95446	39.9823	17.6871	14.309	14.2706	0.741345	0.344803
chr3:40457311-40457350:+	RPL14	ENST00000338970.10	ENST00000338970.10.1	80.7443	71.1261	147.999	143.072	140.47	145.82	161.112	107.275	0.333089	-0.271043
chr3:31981780-31988768:+	ZNF860	ENST00000360311.4	ENST00000360311.4.1	1	10.3502	1	1.92836	1	1.68635	1.52833	0.77579	2.17196	1.36143
chr3:52198673-52198826:+	ALAS1	ENST00000394965.6	ENST00000394965.6.1	114.321	89.8264	55.1331	38.0917	36.7413	12.7063	25.0216	28.0682	2.18793	1.78047
chr3:55487080-55487338:-	WNT5A	ENST00000474267.5	ENST00000474267.5.1	21.9853	24.3754	14.1249	12.2618	10.5106	11.9891	6.45277	17.3673	0.608155	0.811441
chr3:52770685-52770946:-	NEK4	ENST00000233027.9	ENST00000233027.9.1	3.68065	57.1009	7.02777	4.91371	5.78271	11.8118	10.3074	9.29869	1.82757	0.740054
chr3:100401645-100401672:+	LNP1	ENST00000383693.7	ENST00000383693.7.2	1	5.67508	1.87499	2.73259	1	1	2.07699	2.15603	2.00426	1.1449
chr3:100492769-100492874:+	TMEM45A	ENST00000323523.8	ENST00000323523.8.1	9.39413	5.67508	1.72414	2.90214	10.529	3.24367	3.59267	4.61925	0.491566	-0.0931189
chr3:101782156-101782231:+	NXPE3	ENST00000491511.6	ENST00000491511.6.1	5.19707	15.0252	8.9333	20.0585	8.42676	9.54707	9.46938	19.7855	0.344269	0.0523194
chr3:113216211-113249796:+	BOC	ENST00000495514.5	ENST00000495514.5.1	5.19707	10.3502	5.19998	7.06406	10.529	1.18325	4.69828	3.16714	3.29414	1.65283
chr3:114389060-114389105:-	ZBTB20	ENST00000357258.8	ENST00000357258.8.1	9.39413	1	4.49997	5.33147	2.73254	3.05905	3.15398	3.02306	1.1156	0.798078
chr3:112561596-112561629:-	ATG3	ENST00000283290.9	ENST00000283290.9.1	21.9853	75.8012	14.6818	13.6809	21.4236	65.5169	12.3114	12.6055	0.0642952	0.157381
chr3:120244342-120285033:-	GPR156	ENST00000464295.5	ENST00000464295.5.1	1	1	1	1	1	2.3727	1.71799	1.44842	0.211406	-0.57028
chr3:170172708-170181738:-	PHC3	ENST00000495893.6	ENST00000495893.6.1	63.956	4.32234	8.97673	14.1928	12.0957	8.56771	8.2556	8.78484	1.8684	1.0866
chr3:172750791-172750824:+	ECT2	ENST00000232458.9	ENST00000232458.9.2	252.824	46.3085	84.9998	151.394	188.981	136.939	142.591	127.554	0.411412	-0.209644
chr3:185282998-185285532:+	MAP3K13	ENST00000446828.5	ENST00000446828.5.1	0.192416	15.0252	1	1.63405	1.95106	0.598619	0.92746	1.59101	10.5576	2.77103
chr4:26860716-26860944:+	STIM2	ENST00000467087.5	ENST00000467087.5.1	1.70784	52.4258	8.83999	9.77429	20.0311	14.0133	16.556	16.1472	1.45692	0.311991
chr4:40750607-40750655:+	NSUN7	ENST00000381782.6	ENST00000381782.6.1	5.19707	1	1.63636	1	3.59882	1	1.41793	2.08357	0.349962	0.0278982
chr4:54229374-54229401:+	PDGFRA	ENST00000257290.9	ENST00000257290.9.1	13.5912	5.67508	4.49997	3.59888	2.73254	3.7454	4.58996	6.20214	1.74164	1.00893
chr4:54229228-54229288:+	PDGFRA	ENST00000257290.9	ENST00000257290.9.2	13.5912	5.67508	4.49997	3.59888	2.73254	3.7454	4.58996	6.20214	1.74164	1.00893
chr4:55510005-55546898:-	CLOCK	ENST00000513440.5	ENST00000513440.5.2	17.7883	2.35507	4.4186	5.46226	7.34041	9.67809	8.32126	6.79188	0.845088	0.000688632
chr4:78057966-78237562:+	FRAS1	ENST00000512123.3	ENST00000512123.3.1	47.1677	43.0757	14.5172	20.9725	24.1082	33.9767	27.5877	20.5392	0.515431	0.254478
chr4:147617441-147617471:+	TMEM184C	ENST00000508208.5	ENST00000508208.5.3	9.39413	5.67508	7.99997	2.44427	26.1219	24.3359	12.8873	11.5378	0.162767	-1.4886
chr4:170089686-170089710:-	AADAT	ENST00000515480.5	ENST00000515480.5.1	13.5912	1	4.49997	5.33147	3.59882	7.8635	4.23096	4.58735	1.35719	0.615778
chr5:6713618-6713690:+	PAPD7	ENST00000230859.7	ENST00000230859.7.1	68.1531	9.23791	18.8181	20.9725	29.7787	30.7112	16.7618	27.5954	0.73594	0.160961
chr5:52800237-52800285:+	PELO	ENST00000274311.2	ENST00000274311.2.1	143.7	13.3569	20.0351	71.0621	85.8947	94.3436	17.0853	37.9974	0.669522	0.280182
chr5:73562977-73565270:-	ANKRA2	ENST00000296785.7	ENST00000296785.7.1	1	2.64758	8.95452	4.29819	4.48722	4.84828	4.61595	6.70818	0.65512	-0.256016
chr5:87412777-87412846:-	CCNH	ENST00000256897.8	ENST00000256897.8.1	4.70569	66.4511	18.907	25.7933	8.17208	17.6287	33.8814	42.5543	1.38119	0.461912
chr5:102866054-102866099:+	PAM	ENST00000438793.7	ENST00000438793.7.2	17.9593	17.4758	27.74	21.209	34.5459	42.9771	32.833	68.8164	0.202028	-0.943712
chr5:136153602-136153722:+	SMAD5	ENST00000545279.5	ENST00000545279.5.2	17.1517	5.27158	12.831	10.9553	7.99468	6.5171	7.38655	9.53355	0.516506	0.546085
chr5:140827986-140828016:+	PCDHA6	ENST00000529310.5	ENST00000529310.5.1	5.19707	1	1	1.86629	1.86627	3.05905	3.51297	2.73405	1.03068	0.0281805
chr5:141970731-141970848:+	RNF14	ENST00000394520.6	ENST00000394520.6.2	5.8455	38.4006	9.94443	13.7577	11.4765	9.75017	6.28534	10.4167	1.27576	0.877882
chr5:141637646-141637895:+	RELL2	ENST00000297164.7	ENST00000297164.7.2	1	1	1.93333	1	2.73254	1.81401	1.52833	1.40214	0.335718	-0.466227
chr5:159268904-159268937:+	UBLCP1	ENST00000296786.7	ENST00000296786.7.1	14.7289	71.1261	24.1724	30.4832	98.0225	37.1005	30.4312	20.5302	0.672769	0.119855
chr5:169583793-169583817:+	SPDL1	ENST00000265295.8	ENST00000265295.8.1	4.17756	6.69544	12.831	23.5038	8.18072	39.408	17.0689	20.9349	0.347566	-0.646683
chr5:178113768-178119577:+	RP11-889L3.3	ENST00000274605.5	ENST00000274605.5.1	1	5.67508	1.46666	5.33147	5.33136	2.3727	2.6717	2.73405	0.923644	0.344369
chr6:13974242-13976930:+	RNF182	ENST00000488300.5	ENST00000488300.5.1	9.39413	2.64758	3.86363	6.10597	5.64172	4.18197	3.69731	8.58501	0.406715	0.0195001
chr6:26224904-26224937:+	HIST1H3E	ENST00000634733.1	ENST00000634733.1.1	38.7736	19.7003	11.2666	3.65573	25.2556	14.0407	5.21146	7.02088	0.585631	0.490807
chr6:26402284-26402365:+	BTN3A1	ENST00000289361.10	ENST00000289361.10.1	9.39413	1	2.74999	1	1	4.43175	1.41793	2.73405	3.76313	1.57591
chr6:36874864-36874996:-	PPIL1	ENST00000373699.5	ENST00000373699.5.1	12.4259	11.2043	15.3657	30.2757	44.3279	29.0274	29.7584	38.7411	0.187376	-1.0261
chr6:108260901-108261225:-	SNX3	ENST00000230085.12	ENST00000230085.12.1	2.23523	61.776	3.07407	4.3449	7.21268	18.1075	5.91781	6.52603	1.2678	0.294775
chr6:135490726-135492275:-	AHI1	ENST00000367800.8	ENST00000367800.8.1	42.9707	38.4006	8.48274	41.7158	12.3134	22.1167	19.1487	18.0188	1.09686	0.997138
chr6:136289741-136289801:-	BCLAF1	ENST00000531224.5	ENST00000531224.5.1	33.3033	18.616	68.1362	12.7327	111.883	53.2775	26.7516	40.4833	0.964267	-0.189109
chr6:142783547-142836971:-	HIVEP2	ENST00000367604.6	ENST00000367604.6.1	59.7589	71.1261	24.5454	22.5576	26.9937	43.3283	20.1857	27.5562	0.51757	0.558256
chr6:154733422-154733554:+	SCAF8	ENST00000367178.7	ENST00000367178.7.1	63.1839	375.006	72.5554	73.7542	233.161	250.831	260.554	190.009	0.51414	-0.71746
chr7:1709170-1709245:+	ELFN1	ENST00000424383.4	ENST00000424383.4.1	1	1	3.62498	1.46418	3.59882	5.1181	2.84914	2.34526	0.424218	-0.755188
chr7:2232872-2232935:-	MAD1L1	ENST00000406869.5	ENST00000406869.5.1	131.109	85.1514	31.8965	59.0223	26.9967	43.3283	67.8332	101.864	1.76881	0.976617
chr7:2958516-3043893:-	CARD11	ENST00000396946.8	ENST00000396946.8.1	1.30881	1.45169	2.09375	6.77709	4.89967	2.85845	3.43281	4.86117	0.422527	-0.525418
chr7:25179332-25180180:-	C7orf31	ENST00000409280.5	ENST00000409280.5.1	13.5912	3.47137	5.45453	7.4985	5.33136	8.54985	3.71651	3.54688	0.806828	0.708644
chr7:73829308-73829530:+	CLDN4	ENST00000435050.1	ENST00000435050.1.1	1	1	1	0.535821	0.535828	1	1	1.28901	0.517682	0.0982704
chr7:66921339-66921384:+	TMEM248	ENST00000341567.8	ENST00000341567.8.1	80.7443	43.0757	12.8611	41.3835	42.8467	70.5976	77.0624	55.2887	0.633366	-0.230211
chr7:91940881-91940941:+	AKAP9	ENST00000356239.7	ENST00000356239.7.1	47.0323	440.457	103.136	178.316	178.586	248.086	143.912	156.153	0.55716	-0.0374976
chr7:76404471-76409592:-	SSC4D	ENST00000275560.3	ENST00000275560.3.1	9.39413	1	1.87499	1	1	2.3727	1.71799	1.57802	3.76574	1.52866
chr7:76409525-76409624:-	SSC4D	ENST00000275560.3	ENST00000275560.3.2	9.39413	1	1.87499	1	1	2.3727	1.71799	1.57802	3.76574	1.52866
chr7:100478098-100478170:-	TSC22D4	ENST00000300181.6	ENST00000300181.6.2	7.46067	19.7003	3.60465	2.59424	2.88267	3.01332	2.21923	2.95712	2.18226	1.53946
chr7:101816020-101816077:+	CUX1	ENST00000437600.9	ENST00000437600.9.1	12.6162	206.703	17.0704	16.55	20.7382	7.45256	16.0684	15.8337	11.6194	2.92846
chr7:128476765-128479161:+	METTL2B	ENST00000480046.5	ENST00000480046.5.1	4.23033	1	2.7907	1.3586	2.74609	5.03153	4.52323	4.21991	0.525307	-0.578757
chr7:134316805-134316850:-	SLC35B4	ENST00000378509.8	ENST00000378509.8.1	51.3648	52.4258	31.3332	12.5366	25.6011	83.362	70.6452	37.0798	0.673279	-0.227326
chr7:152660748-152676132:-	XRCC2	ENST00000359321.1	ENST00000359321.1.1	17.7883	4.61353	15.9333	6.15063	3.79549	6.6808	4.84461	5.5746	1.62906	1.28828
chr8:33461509-33461599:-	FUT10	ENST00000327671.9	ENST00000327671.9.2	9.39413	1	4.81817	11.2119	4.80424	1.80462	1.62571	1.69807	2.23903	1.59407
chr8:42472540-42472615:-	SLC20A2	ENST00000342228.7	ENST00000342228.7.1	21.9853	1	8.87494	7.93035	13.1278	3.8927	10.4033	10.641	0.50958	-0.18035
chr8:38468283-38468310:-	FGFR1	ENST00000397091.9	ENST00000397091.9.2	34.5765	47.7508	7.36362	22.6573	29.7787	37.3766	34.225	14.6997	0.500629	0.0687317
chr8:41599015-41599084:+	AGPAT6	ENST00000396987.7	ENST00000396987.7.3	9.88342	15.0252	14.5333	10.7478	41.7148	26.395	14.1646	9.77368	0.351144	-0.448182
chr8:42271370-42272088:+	IKBKB	ENST00000520810.5	ENST00000520810.5.1	80.7443	66.4511	33.6665	32.5642	39.116	19.3152	19.3215	30.5957	0.865495	1.05509
chr8:56212779-56212815:+	CHCHD7	ENST00000523975.5	ENST00000523975.5.1	9.39413	19.7003	21.1249	18.3259	33.9183	13.7279	13.0737	18.1579	0.515506	0.116733
chr8:103300009-103300102:+	FZD6	ENST00000522566.5	ENST00000522566.5.1	38.7736	85.1514	10.8	19.3873	39.0621	38.4693	21.5405	21.3564	0.639353	0.206419
chr8:123267351-123274265:-	ZHX1-C8orf76	ENST00000622816.2	ENST00000622816.2.2	13.5912	15.0252	1.24561	3.91017	2.9401	1.74311	1.57584	2.01966	3.0121	1.9972
chr8:143247195-143247291:+	RP13-582O9.6	ENST00000522452.1	ENST00000522452.1.1	5.19707	1	5.37497	1.63405	1.92834	1.68635	2.58498	4.17909	0.974907	0.525669
chr9:6757788-6757845:+	KDM4C	ENST00000381309.7	ENST00000381309.7.1	55.5619	10.8855	27.1332	71.1698	33.9183	44.2401	28.7371	50.1313	0.53373	0.0867896
chr9:12775020-12775101:+	LURAP1L	ENST00000319264.3	ENST00000319264.3.2	5.19707	24.3754	3.33332	12.2618	3.32086	0.690258	3.90579	2.46517	14.3092	3.41636
chr9:35546445-35546529:+	RUSC2	ENST00000361226.7	ENST00000361226.7.1	21.9853	2.64758	18.2666	33.9192	26.1219	21.5905	15.8363	29.9008	0.417325	-0.298619
chr9:70259007-70264305:+	SMC5	ENST00000361138.6	ENST00000361138.6.1	6.72709	10.0144	11.7168	12.7458	8.72054	13.6998	14.3408	12.1675	0.122651	-0.248557
chr9:71768394-71768460:-	TMEM2	ENST00000377044.8	ENST00000377044.8.1	55.5619	197.353	23.9444	10.1225	39.996	103.76	26.2452	16.0519	0.483549	0.27326
chr9:78236102-78236177:+	CEP78	ENST00000424347.6	ENST00000424347.6.1	26.0351	27.3613	44.909	75.7328	34.9402	57.9892	71.8383	42.86	0.50855	-0.148365
chr9:92289378-92293461:-	IARS	ENST00000375643.7	ENST00000375643.7.1	6.97355	11.7696	36.9953	46.2733	48.9786	120.806	53.7392	120.559	0.234861	-1.60818
chr9:122270866-122270998:+	MRRF	ENST00000344641.7	ENST00000344641.7.2	4.5742	61.776	11.862	8.26831	9.66557	7.03461	9.05191	16.4153	3.48863	1.46847
chr9:128683719-128691223:+	SET	ENST00000372692.8	ENST00000372692.8.1	0.752943	1.30154	0.721162	0.940755	0.82472	2.72305	0.880657	1.69003	0.179621	-0.531947
chr9:128818475-128818565:+	ENDOG	ENST00000372642.4	ENST00000372642.4.1	1.70784	5.06522	8.29577	6.81032	28.2638	9.31436	8.56238	17.2353	0.326237	-1.0231
chr9:134026304-134026505:+	RP11-374P20.5	ENST00000603928.2	ENST00000603928.2.3	1.80758	1	0.758621	1.92836	0.386832	1	0.550197	0.702826	1.43849	1.29209
chr10:26860838-26860880:-	ABI1	ENST00000376138.7	ENST00000376138.7.1	24.4199	113.202	37.909	41.579	19.431	58.7945	43.8654	30.4063	0.379476	0.436639
chr10:37838001-37856474:-	ZNF248	ENST00000615949.6	ENST00000615949.6.1	0.382385	0.176209	0.58	0.672287	0.509466	1.3665	0.848374	0.942727	0.255211	-0.813309
chr10:44959831-44970171:+	RASSF4	ENST00000340258.9	ENST00000340258.9.1	1	1	1.87499	1	1.86627	2.3727	2.07699	2.44504	0.199903	-0.817927
chr10:32305872-32378647:-	EPC1	ENST00000375110.6	ENST00000375110.6.1	4.24535	15.0044	3.97345	3.14675	2.18778	6.08456	3.08155	3.81095	0.624128	0.705231
chr10:58269074-58269185:+	CISD1	ENST00000333926.5	ENST00000333926.5.1	4.23033	19.7003	25.4998	7.65749	24.6728	10.3872	13.0737	23.3439	0.838941	0.119874
chr10:87096939-87151455:+	FAM35A	ENST00000298786.4	ENST00000298786.4.1	9.39413	10.3502	3.33332	0.580674	4.24921	2.15708	2.10305	2.14722	1.64707	1.14803
chr10:86364017-86366414:-	GRID1	ENST00000327946.11	ENST00000327946.11.1	1	33.7255	5.82758	3.85321	7.40233	7.59705	6.73064	5.81097	1.70311	0.609591
chr10:113853776-113853818:-	DCLRE1A	ENST00000369305.1	ENST00000369305.1.1	51.3648	61.776	48.2497	26.994	18.1744	25.0132	25.0307	31.9238	0.748337	1.01242
chr11:28097933-28108069:-	KIF18A	ENST00000263181.6	ENST00000263181.6.1	36.5337	136.577	22.9767	20.1309	24.3489	20.9813	29.2282	28.5332	2.40679	1.24816
chr11:47214993-47215017:+	DDB2	ENST00000256996.8	ENST00000256996.8.1	20.382	225.404	94.6243	109.287	144.801	39.5911	93.98	100.13	2.17415	0.987749
chr11:59142881-59143275:+	FAM111A	ENST00000528737.5	ENST00000528737.5.1	13.5912	29.0505	10.6249	4.4922	7.93018	4.59523	3.6527	3.54688	1.9806	1.61011
chr11:57753519-57791389:+	CTNND1	ENST00000524630.5	ENST00000524630.5.1	5.894	13.2306	18.0866	16.1465	26.1123	11.713	20.8145	20.4145	0.329662	-0.407767
chr11:61333248-61334700:+	TKFC	ENST00000394900.7	ENST00000394900.7.2	9.39413	15.0252	5.17543	7.0178	31.1712	6.42049	5.23824	6.66891	0.736691	0.227094
chr11:61361819-61362095:-	CYB561A3	ENST00000294072.8	ENST00000294072.8.3	0.358796	2.64758	1.35354	4.48726	5.09208	3.46804	1.87703	2.18187	0.720503	-0.147364
chr11:60913899-60914088:+	TMEM109	ENST00000227525.7	ENST00000227525.7.1	14.7289	61.776	21.8372	29.1633	91.9586	18.8704	31.6575	24.027	1.18002	0.416147
chr11:64305704-64307171:+	ESRRA	ENST00000406310.5	ENST00000406310.5.1	1.80758	1	1.77778	3.21916	12.2615	5.07003	3.21058	3.32555	0.329178	-1.09975
chr11:64317976-64318009:-	TRMT112	ENST00000544844.5	ENST00000544844.5.1	68.1531	71.1261	73.6245	97.1586	65.0558	158.861	92.9286	101.894	0.228371	-0.303504
chr11:66288240-66289145:-	YIF1A	ENST00000376901.8	ENST00000376901.8.1	3.48174	2.44837	3.50459	3.09911	3.2219	3.67832	3.72123	4.13199	0.162211	-0.218397
chr11:68030653-68032164:+	NDUFS8	ENST00000313468.9	ENST00000313468.9.1	3.24747	10.2551	8.92386	7.99733	10.5926	17.4759	9.13346	13.6027	0.238606	-0.702301
chr11:106022143-106022182:-	MSANTD4	ENST00000301919.8	ENST00000301919.8.1	55.5619	94.5015	98.1243	109.287	42.5811	77.8712	43.5302	70.0729	0.407696	0.662705
chr11:107565665-107565722:-	ALKBH8	ENST00000428149.6	ENST00000428149.6.1	38.7736	15.0252	24.6248	11.4618	14.8604	9.09955	17.1139	14.0034	0.643105	0.70438
chr11:111937376-111937409:+	DIXDC1	ENST00000440460.6	ENST00000440460.6.1	13.5912	5.67508	2.27272	6.19776	9.66272	7.51205	7.60407	4.8699	0.439675	-0.0994433
chr11:131370619-131370724:+	NTM	ENST00000374791.7	ENST00000374791.7.1	5.19707	1	1	1	2.73254	1.68635	1	1	0.479027	0.168293
chr12:3697008-3733103:-	EFCAB4B	ENST00000440314.6	ENST00000440314.6.1	1	5.67508	1	1.86629	1	1.68635	1.20896	3.02306	1.11266	0.538491
chr12:989953-990034:-	RAD52	ENST00000430095.6	ENST00000430095.6.1	38.7736	29.0505	8.87494	16.5933	5.33136	7.8635	7.46193	9.38123	2.37729	1.79963
chr12:2874477-2874504:-	FOXM1	ENST00000361953.7	ENST00000361953.7.1	105.927	71.1261	57.8746	55.5765	66.8367	30.7112	24.1061	31.8507	0.352621	1.00837
chr12:10613518-10613599:-	MAGOHB	ENST00000320756.6	ENST00000320756.6.1	42.9707	29.0505	14.7586	7.63419	6.39588	16.5764	9.67548	8.57462	2.3291	1.44449
chr12:21501185-21501221:-	RECQL	ENST00000444129.6	ENST00000444129.6.1	31.6882	216.054	224.998	202.846	176.853	96.7482	101.25	114.001	0.842448	0.681197
chr12:39443085-39443109:-	KIF21A	ENST00000361961.7	ENST00000361961.7.1	30.3795	57.1009	51.7496	39.1169	72.9006	90.2255	72.0812	72.0959	0.111643	-0.792047
chr12:6493497-6493617:+	NCAPD2	ENST00000315579.9	ENST00000315579.9.1	882.384	739.662	254.59	165.521	69.3826	87.4969	67.4202	51.3695	3.85559	2.81607
chr12:45729744-45729765:+	ARID2	ENST00000334344.10	ENST00000334344.10.1	89.1384	117.877	67.7331	57.1656	157.795	156.115	100.589	125.851	0.113294	-0.708658
chr12:49348788-49348869:+	DNAJC22	ENST00000549441.6	ENST00000549441.6.2	1	5.67508	5.66665	1.48142	2.85669	2.15708	3.59267	6.38103	0.980935	0.260148
chr12:51246794-51270548:-	SMAGP	ENST00000603798.5	ENST00000603798.5.1	5.19707	1.82379	3.33332	2.39254	1.08227	2.0841	3.59267	1.34578	1.60303	1.06742
chr12:52949749-52949842:-	KRT8	ENST00000552551.5	ENST00000552551.5.1	33.3033	178.653	102.182	32.7622	112.866	127.989	49.5254	31.7448	0.638465	0.258874
chr12:53252110-53252845:+	MFSD5	ENST00000329548.4	ENST00000329548.4.1	34.5765	33.7255	21.5333	10.5107	13.0286	27.8622	8.10153	12.7174	0.829902	0.877496
chr12:56042015-56042063:+	RPS26	ENST00000356464.10	ENST00000356464.10.3	1	1	1.24138	1.97006	2.73254	0.380516	0.637301	1.26809	0.821669	0.699418
chr12:71686486-71686684:+	TMEM19	ENST00000266673.9	ENST00000266673.9.3	26.1824	0.377703	2.85937	2.96214	5.30962	4.81288	6.89053	6.04537	1.99931	0.56427
chr12:89524355-89524661:-	GALNT4	ENST00000529983.2	ENST00000529983.2.1	3.42275	4.29516	9.39997	7.0178	19.1917	18.8451	5.66676	11.9888	0.596199	-0.593779
chr12:109469700-109477498:-	KCTD10	ENST00000228495.10	ENST00000228495.10.1	30.3795	5.94275	21.0666	42.5821	53.8426	36.4093	38.5111	24.6838	0.585416	-0.415241
chr12:116737972-116737993:-	C12orf49	ENST00000261318.4	ENST00000261318.4.1	5.19707	10.3502	7.12496	2.85671	13.9941	7.51205	5.80614	6.41786	0.451029	-0.225395
chr12:121804189-121804733:+	SETD1B	ENST00000542440.5	ENST00000542440.5.1	38.7736	33.7255	19.1999	13.2763	8.96182	22.5712	33.1802	26.4134	1.55157	0.787016
chr12:132828464-132828734:-	GOLGA3	ENST00000456883.6	ENST00000456883.6.2	126.912	24.8899	123.499	74.8044	33.4959	41.4977	35.9438	59.0574	1.36589	1.18447
chr13:25287295-25287598:-	MTMR6	ENST00000381801.5	ENST00000381801.5.1	63.956	11.7093	14.8372	22.2406	18.4609	27.938	18.1287	16.0667	1.17295	0.605546
chr13:27424543-27424780:+	GTF3A	ENST00000381140.8	ENST00000381140.8.1	26.1824	38.4006	2.46511	17.4596	4.68619	10.7681	5.35238	11.8357	1.97359	1.47106
chr13:36995540-36999307:-	ALG5	ENST00000239891.3	ENST00000239891.3.1	38.7736	5.51692	10.6552	5.21361	6.89882	9.55374	6.95176	5.90595	2.03119	1.10656
chr13:32586526-32648869:+	PDS5B	ENST00000315596.14	ENST00000315596.14.1	236.036	22.2295	25.0702	18.0337	18.4718	14.9096	16.7691	17.0272	4.95241	2.07238
chr13:49433381-49434151:-	CAB39L	ENST00000409308.5	ENST00000409308.5.1	5.19707	10.3502	6.24996	3.78507	2.39252	5.88404	1.83585	4.17909	0.90041	1.04288
chr13:51791225-51804109:-	DHRS12	ENST00000218981.5	ENST00000218981.5.1	5.19707	1	0.533335	1	0.68298	0.266994	1.25689	0.865954	2.81172	1.69309
chr13:80337646-80337748:-	SPRY2	ENST00000377104.3	ENST00000377104.3.1	6.65309	19.7003	9.59089	6.04429	6.07233	7.10505	3.96974	4.61152	0.711014	0.92506
chr14:20684216-20693571:+	ANG	ENST00000336811.10	ENST00000336811.10.1	0.192416	1	0.511629	4.46518	1.92834	4.43175	2.25378	2.44504	0.712913	-0.749854
chr14:24430833-24430953:-	CBLN3	ENST00000555436.1	ENST00000555436.1.1	1	1	1	1	1	1	1	1	0	0
chr14:49620983-49621022:+	MGAT2	ENST00000305386.3	ENST00000305386.3.2	30.3795	29.0505	25.2666	28.7214	15.9	62.0852	34.2845	45.1693	0.569815	-0.0925688
chr14:77105666-77105705:+	CIPC	ENST00000361786.6	ENST00000361786.6.1	9.39413	61.776	6.0465	5.26825	32.1858	32.5721	15.6274	9.51378	0.65014	-0.354238
chr14:103385545-103385662:+	MARK3	ENST00000429436.6	ENST00000429436.6.1	55.5619	75.8012	31.3332	19.0703	52.1101	78.5576	47.7568	31.1604	0.194722	-0.277858
chr15:40323755-40323863:+	INAFM2	ENST00000638170.1	ENST00000638170.1.1	1	0.176209	3.54545	6.19776	5.64172	3.84902	6.81158	6.2278	0.367095	-1.20198
chr15:56917762-56918062:-	RP11-566D24.2	ENST00000559000.6	ENST00000559000.6.2	30.3795	24.3754	5.66665	19.1922	13.1278	14.727	10.774	11.6933	0.642446	0.617423
chr15:60479003-60479099:-	ICE2	ENST00000261520.8	ENST00000261520.8.1	12.3062	15.0044	64.8745	32.1	20.9594	27.0482	12.1547	9.28962	2.02521	1.31248
chr15:65611464-65611605:+	SLC24A1	ENST00000537259.5	ENST00000537259.5.1	9.39413	1	4.18181	5.17761	2.90212	8.54985	2.88066	4.81156	1.1301	0.556235
chr15:74956907-74957081:-	RPP25	ENST00000322177.5	ENST00000322177.5.1	1	5.67508	3.33332	2.39254	6.1059	0.71073	3.07413	5.33512	3.22991	1.27521
chr15:79923576-79923735:-	ST20-MTHFS	ENST00000479961.1	ENST00000479961.1.1	21.9853	2.55574	7.01754	7.15011	17.168	13.2348	14.2181	9.39723	0.399707	-0.55208
chr15:90868703-90875750:+	FURIN	ENST00000268171.7	ENST00000268171.7.2	13.1138	3.25846	4.85897	7.49922	16.2737	25.6804	9.42691	20.7447	0.246529	-1.14429
chr16:3609437-3609530:-	SLX4	ENST00000294008.3	ENST00000294008.3.2	21.9853	5.11895	7.75861	13.0469	4.36994	5.21478	18.1706	14.0034	1.85345	0.881926
chr16:30651024-30651111:+	PRR14	ENST00000300835.8	ENST00000300835.8.1	12.3062	52.4258	5.55813	3.65573	15.8535	11.703	5.75158	9.03051	1.64228	0.728384
chr16:46884383-46884434:+	GPT2	ENST00000340124.8	ENST00000340124.8.1	101.73	99.1766	82.1997	165.596	59.9065	36.0039	41.7487	72.361	0.393277	1.12269
chr16:67416269-67416335:-	ZDHHC1	ENST00000348579.6	ENST00000348579.6.1	1	5.67508	2.39999	3.59888	3.85318	3.84902	4.13444	5.76181	0.449688	-0.444653
chr16:67518572-67538469:+	FAM65A	ENST00000562116.1	ENST00000562116.1.1	0.192416	1	0.517242	1	0.535828	0.421461	0.481466	0.527193	0.771345	0.511707
chr16:70398884-70399052:-	ST3GAL2	ENST00000393640.8	ENST00000393640.8.3	2.61517	0.176209	0.543479	1.58203	2.25797	0.611826	1.22355	1.45121	0.383794	-0.424433
chr16:72960131-73058643:-	ZFHX3	ENST00000641206.2	ENST00000641206.2.1	97.5325	85.1514	70.9995	17.4852	16.4055	14.9271	17.2109	19.6324	2.0163	2.05879
chr17:5419996-5420119:-	NUP88	ENST00000573584.5	ENST00000573584.5.1	278.006	356.306	193.733	372.64	155.105	302.308	286.761	198.615	0.48811	0.465393
chr17:6651781-6651835:+	C17orf100	ENST00000542475.2	ENST00000542475.2.1	5.19707	0.176209	2.39999	2.39254	5.33136	1.407	1.20896	1.59101	0.689832	0.19818
chr17:19648909-19649098:+	ALDH3A2	ENST00000176643.10	ENST00000176643.10.1	6.89864	11.8406	16.6406	16.5151	9.17116	16.4491	8.3623	9.43734	0.573398	0.381828
chr17:28717319-28718267:-	RAB34	ENST00000301043.10	ENST00000301043.10.1	1.78138	2.15077	2.04407	3.22951	2.23507	2.92086	2.4471	4.84041	0.0636553	-0.397893
chr17:28902797-28902944:-	DHRS13	ENST00000394901.7	ENST00000394901.7.1	11.4986	10.0617	9.59089	3.2364	12.4127	10.5459	5.68783	6.77844	0.433297	0.0158214
chr17:31094993-31095038:+	NF1	ENST00000356175.7	ENST00000356175.7.1	27.6503	206.703	55.7271	62.5025	204.574	62.3892	65.2216	59.6036	1.19012	0.419903
chr17:42730877-42745017:-	EZH1	ENST00000415827.6	ENST00000415827.6.1	68.1531	33.7255	29.8748	22.8164	30.4533	30.5131	14.7915	17.3	0.470925	0.740242
chr17:42348526-42388559:-	STAT3	ENST00000264657.9	ENST00000264657.9.1	55.1081	57.0178	28.8205	24.7775	42.0733	28.4048	21.6693	40.2771	0.492272	0.395703
chr17:44216637-44221545:-	UBTF	ENST00000302904.8	ENST00000302904.8.1	21.5517	11.1651	10.5266	9.14373	7.96741	8.0203	10.8989	13.1054	0.771084	0.526229
chr17:59731441-59731486:+	VMP1	ENST00000262291.8	ENST00000262291.8.1	20.382	10.9372	13.8333	10.6262	37.2799	15.7219	20.0952	13.3331	0.0890859	-0.552283
chr17:59155143-59155257:-	SKA2	ENST00000330137.11	ENST00000330137.11.1	34.5765	6.76654	11.5	30.454	14.9489	8.94275	6.07778	7.01655	1.29506	1.21755
chr17:60391887-60391950:-	USP32	ENST00000300896.8	ENST00000300896.8.1	55.5619	11.7093	39.4997	20.3384	18.1744	31.1182	40.6244	21.7772	1.02193	0.416754
chr17:64496980-64497001:-	POLG2	ENST00000539111.6	ENST00000539111.6.1	59.7589	57.1009	25.4998	10.5107	15.7266	12.3961	12.0948	17.4735	1.54698	1.47457
chr17:64661945-64662035:-	SMURF2	ENST00000262435.13	ENST00000262435.13.1	21.9853	29.0505	12.2	4.36997	9.34243	35.3175	7.10918	13.6003	0.785535	0.382176
chr17:73088663-73092645:-	SLC39A11	ENST00000255559.7	ENST00000255559.7.1	9.39413	3.47137	2.75	4.4922	3.45267	3.27974	5.49643	4.70593	0.841964	0.38796
chr17:80263576-80263621:+	RNF213	ENST00000582970.5	ENST00000582970.5.1	173.08	131.902	157.624	178.59	127.476	167.783	90.227	90.9249	0.447492	0.549673
chr17:7251440-7251524:-	CTDNEP1	ENST00000573600.5	ENST00000573600.5.1	4.23033	19.7003	12.2	20.9248	14.9252	9.38882	9.22036	12.9301	0.664962	0.412283
chr18:13730627-13730678:+	RNMT	ENST00000383314.6	ENST00000383314.6.1	25.2275	35.5992	70.9998	72.0132	50.7722	53.6471	69.2333	80.72	0.203793	-0.377955
chr18:21612288-21612318:+	SNRPD1	ENST00000300413.9	ENST00000300413.9.1	51.3648	99.1766	37.909	113.618	53.3084	171.215	134.93	177.584	0.242363	-0.699264
chr18:34493361-34493412:+	DTNA	ENST00000596745.5	ENST00000596745.5.1	30.3795	29.0505	15.9333	46.0473	31.3195	21.3502	13.4448	29.6118	0.216022	0.342205
chr18:75210938-75211181:+	TSHZ1	ENST00000322038.5	ENST00000322038.5.1	42.9707	5.11895	11.7333	4.24974	8.89093	8.52101	7.5506	15.6517	1.80511	0.859832
chr19:2737153-2737300:-	AC006538.4	ENST00000586572.1	ENST00000586572.1.2	1	10.3502	2.26	3.16641	1.82275	1.37155	1.69807	1.87767	2.78354	1.47407
chr19:4818331-4818478:-	TICAM1	ENST00000248244.5	ENST00000248244.5.1	5.19707	1	7.12496	4.46518	7.93018	4.25603	6.28325	7.35817	0.319423	-0.604331
chr19:12610921-12611047:+	ZNF791	ENST00000446165.2	ENST00000446165.2.1	1	1	2.39999	2.26809	1	0.816749	1.83585	1	0.485554	0.535992
chr19:13116704-13116725:-	TRMT1	ENST00000592062.5	ENST00000592062.5.1	55.5619	52.4258	41.5998	87.6294	59.9065	39.4356	49.0776	51.6714	0.339519	0.263158
chr19:43780881-43781151:-	KCNN4	ENST00000262888.7	ENST00000262888.7.1	1	1	1	1	1	1	1	1	0	0
chr19:43827441-43828267:+	ZNF283	ENST00000618787.4	ENST00000618787.4.1	7.70163	4.16184	7.70422	5.55315	2.34476	3.58201	1.97448	2.47575	1.04284	1.40482
chr19:45863090-45863225:-	SYMPK	ENST00000245934.11	ENST00000245934.11.1	29.1468	262.804	336.123	66.9697	236.626	191.805	149.363	55.2873	0.755959	0.308888
chr19:48619443-48620427:+	SPHK2	ENST00000245222.8	ENST00000245222.8.1	30.3795	4.29516	9.39997	2.7461	3.32812	8.54985	6.01249	8.12062	3.63615	1.52758
chr19:48646236-48646275:-	CA11	ENST00000084798.8	ENST00000084798.8.2	21.9853	19.7003	7.99997	5.64179	14.8604	14.727	17.1548	11.9888	0.472725	-0.0915368
chr19:52619052-52660824:-	ZNF83	ENST00000601257.5	ENST00000601257.5.1	0.192416	0.0507606	1	0.350052	0.68298	0.330591	0.410512	0.277695	0.916242	0.0467787
chr19:55675401-55675425:+	EPN1	ENST00000270460.10	ENST00000270460.10.1	84.9413	80.4763	28.9999	31.1716	41.3541	110.816	17.1331	26.8991	0.506272	0.493565
chr20:4801061-4823600:-	RASSF2	ENST00000379400.7	ENST00000379400.7.2	13.5912	29.0505	8.9333	8.60856	12.6043	14.4311	8.07386	8.82232	0.418329	0.371157
chr20:16526146-16573282:-	KIF16B	ENST00000636835.1	ENST00000636835.1.1	38.7736	61.776	6.37209	6.82033	4.73718	4.04351	6.0067	6.36865	5.89295	2.67776
chr20:23350761-23354094:+	NXT1	ENST00000254998.2	ENST00000254998.2.1	1.44678	1.45169	1.33071	1.82275	1.9848	3.48316	2.01084	2.49189	0.128907	-0.655772
chr20:34792472-34792514:-	NCOA6	ENST00000359003.6	ENST00000359003.6.1	72.3501	71.1261	18.1818	21.9235	80.697	20.204	45.6435	39.827	1.27091	0.423786
chr20:32277680-32309720:+	KIF3B	ENST00000375712.3	ENST00000375712.3.1	26.1824	33.7255	43.8747	26.9888	33.9183	27.4552	25.8313	21.8787	0.327609	0.302285
chr20:35801512-35801542:+	PHF20	ENST00000374012.7	ENST00000374012.7.1	9.07584	80.4763	21.3636	22.2406	9.90628	44.9264	26.2845	15.6933	0.394517	0.303766
chr20:37365247-37365271:+	SRC	ENST00000373578.6	ENST00000373578.6.1	34.5765	15.0252	17.6249	20.0585	54.7089	40.8083	41.9255	19.0962	0.268613	-0.694921
chr20:41269043-41269076:-	ZHX3	ENST00000559234.5	ENST00000559234.5.1	21.9853	15.0252	2.75	3.16641	12.1401	21.5905	4.44931	7.02288	0.536786	-0.161725
chr20:44589837-44589861:+	PKIG	ENST00000372887.5	ENST00000372887.5.1	1	1	1	1	6.19763	2.62801	2.5556	2.46517	0.100481	-1.57904
chr20:45363229-45363271:+	SYS1	ENST00000426004.5	ENST00000426004.5.1	5.19707	10.3502	2.86666	2.58512	3.32086	9.2362	6.74394	5.33512	0.471437	-0.153928
chr20:53582970-53583036:-	ZNF217	ENST00000371471.6	ENST00000371471.6.1	59.7589	117.877	73.6245	43.2403	59.9065	62.7715	38.7753	29.7921	0.368748	0.638204
chr21:36057197-36058888:-	SETD4	ENST00000399201.5	ENST00000399201.5.1	26.1824	19.7003	5.61999	6.13418	9.3551	2.16316	5.32529	3.45169	3.19141	1.88151
chr22:20117118-20117376:-	TRMT2A	ENST00000403707.7	ENST00000403707.7.1	93.3354	38.4006	12.5581	20.0162	11.0741	42.8674	18.3726	10.3352	3.17763	1.57825
chr22:25360096-25360183:-	LRP5L	ENST00000444995.7	ENST00000444995.7.1	3.42275	1	1.87499	3.59888	1.86627	1.68635	1.71799	1.86702	0.549384	0.445195
chr22:41301577-41301661:+	ZC3H7B	ENST00000352645.4	ENST00000352645.4.1	13.1138	47.7508	41.2497	8.63688	34.9212	27.2509	18.72	15.8648	0.777842	0.285609
chr22:44702270-44702381:+	PRR5-ARHGAP8	ENST00000361473.9	ENST00000361473.9.1	55.5619	29.0505	49.1247	10.6285	17.246	16.3313	22.9513	16.7503	0.923735	0.958927
chr22:50474910-50475012:-	SBF1	ENST00000380817.7	ENST00000380817.7.1	8.1484	47.7508	15.4666	27.8551	43.365	115.62	28.7827	22.015	0.403519	-0.734844
chr22:50508249-50508276:+	NCAPH2	ENST00000420993.6	ENST00000420993.6.1	114.321	14.5507	6.82301	11.8603	9.05816	14.9579	8.51529	17.6517	5.11302	1.91329
chrX:48696762-48698992:+	SUV39H1	ENST00000376687.3	ENST00000376687.3.1	19.5744	8.67876	39.2665	23.3862	17.3683	17.1261	11.6861	7.83422	1.20542	0.99621
chrX:52369056-52369119:+	XAGE2	ENST00000286049.2	ENST00000286049.2.1	1	1	1	1	1	1	1	1	0	0
chrX:48476177-48476318:+	FTSJ1	ENST00000348411.2	ENST00000348411.2.2	8.26825	3.71015	7.51162	4.4468	10.6284	2.74744	4.59235	6.56007	0.397223	0.15117
chrX:78138920-78139631:-	TAF9B	ENST00000341864.5	ENST00000341864.5.1	12.3062	33.7255	9.95348	9.44932	12.7411	14.6407	7.8737	5.34291	0.508901	0.655838
chrX:153971731-153971788:-	HCFC1	ENST00000310441.11	ENST00000310441.11.3	33.1678	23.5846	91.2757	59.493	169.655	106.453	106.79	139.265	0.263973	-1.23534
chr1:154405344-154405410:+	IL6R	ENST00000368485.7	ENST00000368485.7.1	13.5912	1	11.4999	7.06406	1.86627	1.68635	7.07574	4.11349	2.62279	1.48775
chr2:231463308-231464585:-	NCL	ENST00000322723.8	ENST00000322723.8.1	25.6545	34.8598	21.1711	25.8456	19.0177	18.3882	21.0143	34.4481	0.428767	0.322645
chr3:47513573-47513702:-	ELP6	ENST00000296149.8	ENST00000296149.8.1	6.65309	38.4006	7.29999	6.84953	14.6319	5.17437	5.58728	8.44554	2.8583	1.321
chr4:145098284-145098362:+	ABCE1	ENST00000296577.8	ENST00000296577.8.1	42.9707	71.1261	59.7998	24.6694	28.441	71.4116	48.6524	40.6401	0.331105	0.118698
chr5:36225563-36225620:-	NADK2	ENST00000397338.5	ENST00000397338.5.1	7.46067	43.0757	3.90566	4.94921	9.34243	10.2531	4.99523	5.91917	1.47052	0.72636
chr5:177351520-177351703:-	LMAN2	ENST00000303127.11	ENST00000303127.11.2	20.5835	12.5077	11.1985	11.3445	13.0346	14.036	18.0914	15.4082	0.37228	-0.064343
chr6:46652572-46652761:-	CYP39A1	ENST00000275016.2	ENST00000275016.2.1	9.39413	3.47137	8.46664	5.54963	3.88852	8.81028	1.50679	2.89002	1.90236	1.37144
chr6:166999258-167000064:+	FGFR1OP	ENST00000366847.8	ENST00000366847.8.1	6.80808	61.776	14.0345	13.1408	10.2251	7.98624	15.1566	10.3776	2.94467	1.40509
chr7:6578663-6580647:+	ZDHHC4	ENST00000396706.2	ENST00000396706.2.2	7.46067	15.0252	1.08235	1.6582	1.39593	4.45188	2.15434	1.94467	1.97231	1.33267
chr7:50565304-50565358:-	DDC	ENST00000444124.6	ENST00000444124.6.1	1	1	1.87499	1	1	1	1	1	0.378883	0.2854
chr14:95534986-95543953:+	GLRX5	ENST00000331334.4	ENST00000331334.4.1	1.23595	1	1.29167	1.7065	1.1029	1.538	1.26647	1.38642	0.218229	0.00776415
chr15:34969746-34969830:-	AQR	ENST00000156471.9	ENST00000156471.9.1	168.883	24.0661	137.499	73.8761	107.551	143.761	78.928	73.8681	0.61472	0.163448
chr16:84101898-84101973:-	MBTPS1	ENST00000343411.7	ENST00000343411.7.4	21.1896	17.4758	32.3792	48.2365	54.844	23.6112	26.6065	36.961	0.371932	-0.13268
chr19:929279-929321:+	ARID3A	ENST00000263620.7	ENST00000263620.7.1	21.9853	5.67508	5.19998	7.34047	34.7846	13.2101	21.0764	30.1898	0.159867	-1.36633
chr19:10565026-10566030:-	KRI1	ENST00000312962.10	ENST00000312962.10.1	11.2758	15.0024	12.4366	10.4671	33.4921	8.94275	11.1084	10.7883	0.477397	0.0370555
chr20:35742131-35742260:-	RBM39	ENST00000361162.10	ENST00000361162.10.1	273.809	68.5509	80.1388	39.6944	59.7333	117.576	50.118	121.105	1.69085	0.826532
chr21:14968518-15014422:-	NRIP1	ENST00000400202.5	ENST00000400202.5.1	84.9413	75.8012	44.8665	77.2339	65.9704	46.5844	55.6817	55.2587	0.299723	0.355635
chr22:18149904-18157584:+	USP18	ENST00000215794.7	ENST00000215794.7.1	9.39413	5.67508	1.81395	1.83865	2.68497	4.76051	2.76162	4.05924	1.21318	0.536226
chr5:82277824-82278483:-	RPS23	ENST00000296674.12	ENST00000296674.12.1	3.3417	2.62659	3.50563	4.6006	3.20365	5.8061	4.57258	5.70026	0.210247	-0.382125
chr8:19313628-19313790:+	SH2D4A	ENST00000265807.7	ENST00000265807.7.1	34.5765	15.0252	39.4997	21.4239	19.1917	14.727	27.2067	36.837	0.458086	0.279564
chr8:70608258-70608336:-	TRAM1	ENST00000262213.6	ENST00000262213.6.1	80.7443	155.278	17.52	9.96168	33.3997	108.042	17.9821	21.3493	0.71868	0.404799
chr10:90871973-90872027:+	RPP30	ENST00000371703.7	ENST00000371703.7.1	5.0145	9.58214	7.85858	6.74093	8.88928	8.47044	6.64643	9.27043	0.262635	-0.150053
chr11:75563727-75566413:+	SERPINH1	ENST00000533603.5	ENST00000533603.5.1	34.9549	26.2947	22	24.6908	19.6213	32.8303	29.5257	25.3918	0.416406	0.104307
chr12:113185700-113185823:+	RITA1	ENST00000548278.1	ENST00000548278.1.4	3.42275	1	0.877193	1.38802	1.97005	2.57057	2.7982	2.7426	0.581927	-0.441246
chr16:47132016-47143971:-	NETO2	ENST00000562435.5	ENST00000562435.5.2	5.03792	19.7003	2.22807	1	3.53382	3.7284	3.16159	4.57714	1.99571	0.932191
chr16:88803674-88804775:+	CDT1	ENST00000301019.8	ENST00000301019.8.1	6.09402	5.20668	5.36913	6.39057	6.93373	11.8207	5.70739	5.89408	0.240245	-0.258282
chr3:62319752-62319827:+	C3orf14	ENST00000494481.5	ENST00000494481.5.1	9.39413	1	2.86666	6.19776	5.64172	7.91906	6.30539	5.64388	0.592726	-0.258352
chr9:12775114-12775216:+	LURAP1L	ENST00000319264.3	ENST00000319264.3.3	5.19707	24.3754	1.72414	6.57014	3.32086	1.81401	2.5556	2.46517	5.15899	2.19709
chr19:11435437-11436071:+	PRKCSH	ENST00000591462.5	ENST00000591462.5.1	100.333	94.9122	41.8176	28.6117	106.465	106.357	50.5129	32.9925	0.0415494	-0.180383
chrX:151601549-151604709:+	PASD1	ENST00000370357.4	ENST00000370357.4.1	1	1	1	1	1	1	1	1.28901	0.0970856	-0.0832213
chr1:156194133-156200131:+	SLC25A44	ENST00000359511.4	ENST00000359511.4.2	1	0.83907	1.20588	1.26209	0.905457	1.30553	1.1777	1.32136	0.174932	-0.102294
chr2:157443884-157443986:-	CYTIP	ENST00000439355.5	ENST00000439355.5.1	1	1	1	1	1	1	1	1	0	0
chr4:61201682-61201724:+	ADGRL3	ENST00000512091.6	ENST00000512091.6.1	1.80758	19.7003	26.3748	10.2836	30.4533	39.4356	29.0017	25.6631	0.303053	-1.09769
chr16:3397471-3397627:-	ZSCAN32	ENST00000396852.8	ENST00000396852.8.1	51.3648	6.76654	11.1818	9.42492	19.1917	11.9816	7.04226	6.76399	0.752553	0.637462
chr16:18801485-18801623:-	ARL6IP1	ENST00000304414.11	ENST00000304414.11.1	135.306	15.9058	33.48	14.6186	37.7038	50.3149	33.3979	35.1951	1.32979	0.412132
chr16:28489348-28491764:-	CLN3	ENST00000569430.6	ENST00000569430.6.2	72.3501	7.59033	8.36841	12.7949	27.922	12.1783	13.9783	9.88402	0.808517	0.352642
chr19:579562-579601:+	BSG	ENST00000545507.6	ENST00000545507.6.1	24.0993	51.5895	21.2247	14.7656	25.905	27.7156	16.3361	14.045	0.358067	0.362397
chr1:45660664-45660745:-	GPBP1L1	ENST00000290795.7	ENST00000290795.7.2	2.7871	24.3754	5.8611	20.9597	6.29563	3.40829	9.78847	10.8469	2.72968	1.33993
chr1:244451726-244451903:-	ADSS	ENST00000366535.3	ENST00000366535.3.1	4.36632	4.04967	12.708	17.7416	11.0226	14.2473	11.5168	16.3883	0.378555	-0.480774
chr3:185285537-185285564:+	MAP3K13	ENST00000446828.5	ENST00000446828.5.2	1	15.0252	3.62498	4.46518	5.33136	5.1181	4.58996	3.89008	1.02368	0.339386
chr5:65554878-65561511:-	CENPK	ENST00000396679.5	ENST00000396679.5.1	9.07584	5.06522	4.36792	3.55817	4.43135	5.00932	5.3416	5.36564	0.541387	0.182728
chr6:132814561-132814991:+	RPS12	ENST00000230050.3	ENST00000230050.3.2	1.96708	2.72616	2.09854	2.03362	1.83066	4.32906	3.92328	4.21129	0.233494	-0.555309
chr7:124898354-124928937:-	POT1	ENST00000357628.7	ENST00000357628.7.1	2.7871	75.8012	8.55999	14.9613	11.4617	9.61282	9.43722	7.77726	3.0305	1.45409
chr7:130204087-130205421:-	TMEM209	ENST00000397622.6	ENST00000397622.6.1	89.1384	141.252	40.1034	60.8791	35.1809	93.3898	42.4317	50.9994	0.604536	0.62879
chr10:84139504-84141585:+	GHITM	ENST00000372134.5	ENST00000372134.5.1	13.5996	19.0466	13.4919	18.264	15.7725	23.1073	13.6571	12.1079	0.273933	0.0644818
chr11:70203251-70206151:+	FADD	ENST00000301838.4	ENST00000301838.4.1	2.09246	2.77022	2.43066	2.9324	1.99625	2.21274	2.30735	3.06822	0.108045	0.10746
chr16:31202478-31202979:-	PYCARD	ENST00000247470.9	ENST00000247470.9.1	1	1	1	1	1	1	1.359	1	0.114386	-0.0985684
chr19:36139982-36141025:+	CAPNS1	ENST00000246533.7	ENST00000246533.7.1	24.3059	12.4144	19.1061	15.8742	32.8023	35.1876	24.1161	22.6572	0.172741	-0.628903
chr3:52270714-52270780:-	WDR82	ENST00000463624.1	ENST00000463624.1.1	5.19707	1	1.72414	1.24071	4.71338	11.9816	1.61315	2.13437	0.415932	-0.496049
chr6:10406821-10419490:-	TFAP2A	ENST00000319516.8	ENST00000319516.8.1	0.782867	1.07349	1.28116	1.29658	1.30477	1.30913	1.35519	1.56399	0.124867	-0.324452
chr7:56051681-56051861:+	CCT6A	ENST00000275603.8	ENST00000275603.8.1	26.9398	31.4925	19.6903	41.068	25.776	44.529	30.0043	28.93	0.30601	-0.0633315
chr11:73234128-73234188:+	P2RY2	ENST00000311131.6	ENST00000311131.6.1	1	1	3.62498	1	1	1.68635	1	1.86702	1.27506	0.524462
chr12:7093735-7109194:-	C1RL	ENST00000545280.5	ENST00000545280.5.1	0.553225	1	0.434344	0.372442	0.293504	0.290527	0.307862	0.376233	0.927564	0.950035
chr19:6590122-6603965:-	CD70	ENST00000597430.2	ENST00000597430.2.1	1	1	1	0.535821	1	1	0.614671	0.77579	0.340388	0.110218
chr19:10379647-10379767:-	TYK2	ENST00000525621.5	ENST00000525621.5.1	11.4986	5.66723	5.92187	3.40209	5.9308	7.97897	8.34607	8.25731	0.587839	-0.0852017
chr19:36236068-36236134:+	ZNF146	ENST00000443387.2	ENST00000443387.2.4	9.33781	18.2996	12.9583	14.466	7.54498	8.48097	12.075	13.2468	0.447716	0.475223

## Sheet: Experiment_specific_results
coordinates	gene_symbol	transcript_id	uORF_id	Ratio-A-1	Ratio-A-2	Ratio-A-3	Ratio-A-4	Ratio-B-1	Ratio-B-2	Ratio-B-3	Ratio-B-4	std_main_ORF_to_uORF_ratios	log2FC_main_ORF_to_uORF_ratios
chr8:144509076-144509445:+	MFSD3	ENST00000301327.4	ENST00000301327.4.1	1	0.0665547	1.85965	0.753175	0.634548	1.47815	1.17995	1.98438	0.692029	-0.161435
chr1:24415814-24419407:+	NIPAL3	ENST00000003912.7	ENST00000003912.7.1	2.23523	1.71193	2.73451	1.93973	1.86664	2.033	1.2029	2.00956	0.565242	0.400007
chr18:65751093-65809714:+	CDH7	ENST00000397968.3	ENST00000397968.3.1	2.88757	2.86689	2.93283	3.61404	3.40154	2.05422	2.45199	3.16336	0.195637	0.196318
chr10:95693685-95694015:-	TCTN3	ENST00000265993.13	ENST00000265993.13.1	5.32331	2.24459	2.7973	2.53813	2.71501	3.60987	3.02276	2.70884	0.506467	0.152144
chr6:63572680-63576531:+	PTP4A1	ENST00000370651.5	ENST00000370651.5.1	1.09882	2.19601	1.15909	1.28889	0.752463	0.949349	0.567773	0.528663	0.376475	1.04491
chr2:96208543-96208630:-	STARD7	ENST00000337288.9	ENST00000337288.9.1	2.0535	2.94792	2.82789	4.0167	2.4965	4.74497	2.08023	2.92225	0.330329	0.06273
chr19:32959971-32971914:-	CEP89	ENST00000305768.9	ENST00000305768.9.1	1	2.33763	1.18421	2.07986	1.79649	2.43017	1.76996	1.92858	0.211556	-0.292448
chr12:92145756-92145828:-	BTG1	ENST00000256015.4	ENST00000256015.4.1	6.89864	13.6474	5.96913	6.11633	7.11423	14.4292	6.04843	4.738	0.140813	0.0680893
chr14:103334575-103335924:+	EIF5	ENST00000216554.7	ENST00000216554.7.1	2.9576	4.43871	5.35206	7.45954	2.56931	2.02692	2.55346	3.41907	0.436622	0.929554
chr12:2885284-2885512:+	RHNO1	ENST00000489288.6	ENST00000489288.6.1	1.1603	1	1.39773	1.92383	1.63009	1.64255	1.32941	1.40971	0.29766	-0.098236
chr19:37169899-37169965:-	ZNF585A	ENST00000292841.9	ENST00000292841.9.1	1	3.47137	1.69014	1.5279	0.721718	1.11457	0.68026	0.968214	0.698816	1.09807
chr1:114716156-114716849:-	NRAS	ENST00000369535.4	ENST00000369535.4.1	1.92642	5.11895	4.09167	3.36858	6.77755	5.8248	3.56428	2.33951	0.42628	-0.0927701
chr3:132660317-132660422:+	UBA5	ENST00000356232.8	ENST00000356232.8.1	2.65162	12.5331	7.14034	8.23541	6.27325	30.7112	7.97195	11.2198	0.20781	-0.701067
chr7:27179748-27179910:-	HOXA10	ENST00000396344.4	ENST00000396344.4.1	3.77927	43.0757	8.69999	5.80646	3.43265	7.556	7.67241	6.13981	2.01072	1.1508
chr15:41096325-41116280:-	INO80	ENST00000361937.7	ENST00000361937.7.1	2.7871	33.7255	6.37209	8.70278	17.4592	12.2184	10.8521	10.8107	0.998592	0.108376
chr19:49929395-49930906:+	ATF5	ENST00000423777.6	ENST00000423777.6.1	1.07023	1.94924	1.2561	1.48358	0.277787	0.687963	0.552715	0.591704	0.60321	1.51928
chr6:34425214-34426078:-	RPS10	ENST00000326199.12	ENST00000326199.12.1	0.0194686	0.176209	0.165385	0.163373	0.164682	0.187299	0.0876893	0.08449	0.749125	0.28649
chr16:19523960-19524023:+	CCP110	ENST00000396212.6	ENST00000396212.6.1	5.63211	131.902	12.7209	3.17937	9.53644	17.2615	15.2279	7.5982	3.04622	1.24577
chr19:40742432-40744683:-	C19orf54	ENST00000470681.5	ENST00000470681.5.1	0.264601	0.197425	0.342609	0.439303	0.302691	0.32392	0.377344	0.359482	0.217253	-0.146547
chr11:112025173-112025509:+	DLAT	ENST00000280346.10	ENST00000280346.10.1	5.96348	9.08986	10.7008	14.0656	11.1432	22.4716	9.29219	15.8846	0.29369	-0.426263
chr6:24720331-24720439:-	C6orf62	ENST00000378119.8	ENST00000378119.8.1	0.358796	0.688852	0.273224	0.593759	0.544596	0.342439	0.171657	0.190824	0.880776	0.882383
chrX:103376402-103377041:+	BEX3	ENST00000361298.8	ENST00000361298.8.1	4.17756	11.579	8	12.1925	14.3966	33.8561	12.8118	27.782	0.127496	-1.23831
chr5:52788128-52788173:+	PELO	ENST00000274311.2	ENST00000274311.2.1	143.7	7.32368	16.0845	24.4861	46.0247	39.7621	49.5693	34.3648	1.19152	0.11884
chr9:125707113-125707143:-	MAPKAP1	ENST00000373511.6	ENST00000373511.6.1	38.7736	24.3754	5.33999	6.2383	22.1825	18.4089	7.68271	11.8504	0.489942	0.102166
chr1:9942630-9942735:-	LZIC	ENST00000377223.5	ENST00000377223.5.1	1	1.45169	4.28125	2.34897	1.95014	3.45682	3.69127	5.2019	0.304251	-0.652832
chr13:71867109-71867181:-	DACH1	ENST00000613252.4	ENST00000613252.4.1	14.7289	4.11148	6.8169	9.24674	13.9984	27.8622	13.459	14.5754	0.32335	-0.773087
chr4:155667205-155696947:+	GUCY1A3	ENST00000393832.7	ENST00000393832.7.1	2.61517	3.47137	3.89655	1.98616	2.53752	2.37465	2.81349	2.38745	0.257341	0.235517
chr5:57175831-57175858:+	GPBP1	ENST00000424459.7	ENST00000424459.7.1	59.7589	89.8264	39.1817	131.81	58.174	89.5392	66.3373	71.2289	0.457193	0.160796
chr1:36397811-36397868:-	LSM10	ENST00000315732.2	ENST00000315732.2.1	7.46067	0.176209	1.71795	4.4922	2.34897	9.2362	2.92059	3.40768	1.19009	0.350978
chr1:233327785-233327887:+	RP5-862P8.2	ENST00000366624.7	ENST00000366624.7.1	4.5742	61.776	3.35869	4.06585	5.9308	8.21297	8.53075	10.851	3.0389	1.17974
chr4:145180009-145180147:-	OTUD4	ENST00000447906.7	ENST00000447906.7.1	21.9853	10.3502	3.65517	23.5236	9.81928	29.8267	19.6678	16.3843	0.837176	0.0729957
chr14:70342694-70359603:-	COX16	ENST00000389912.6	ENST00000389912.6.1	7.46067	2.24459	4.18182	3.75341	1.55828	1.62449	1.78135	1.66082	1.26633	1.42989
chr4:75630141-75630276:-	CDKL2	ENST00000429927.6	ENST00000429927.6.1	5.19707	5.67508	1.72414	2.26809	6.57007	6.20685	6.22406	6.60524	0.27572	-0.782313
chr1:53838275-53838407:-	NDC1	ENST00000371429.3	ENST00000371429.3.1	12.1694	16.652	30.931	29.1633	27.3228	43.4347	37.8911	65.6103	0.171544	-0.936788
chr16:66934549-66934678:+	CES2	ENST00000317091.8	ENST00000317091.8.1	9.39413	10.3502	3.44186	1.65543	2.92568	2.73562	1.80867	2.13759	1.16831	1.27379
chr11:2400608-2400794:+	TSSC4	ENST00000380996.9	ENST00000380996.9.1	3.68065	4.61353	5.43662	2.322	8.94344	6.60918	3.3623	6.59177	0.506328	-0.377637
chr9:95875916-95880940:+	ERCC6L2	ENST00000288985.11	ENST00000288985.11.1	3.23388	1.6223	3.82456	4.54528	1.15662	2.1759	2.19551	2.93696	0.730892	0.772127
chr3:47805344-47805419:+	DHX30	ENST00000445061.5	ENST00000445061.5.1	286.4	22.2295	40.5438	42.9326	30.3849	14.9796	21.5659	28.5473	3.38253	1.8373
chr16:67227148-67227879:+	TMEM208	ENST00000304800.13	ENST00000304800.13.1	10.3823	7.32368	6.43529	4.30499	5.80417	5.27687	3.54546	4.17533	0.322105	0.590429
chr5:64768954-64768993:+	CWC27	ENST00000381070.7	ENST00000381070.7.1	63.956	47.7508	23.75	72.9024	59.9065	51.8754	75.2297	53.7462	0.379911	-0.128075
chr19:57389920-57390004:+	ZNF548	ENST00000366197.9	ENST00000366197.9.1	17.1517	85.1514	26.4545	17.5737	17.246	33.2585	29.5296	16.4796	0.684547	0.463903
chr19:48872553-48872634:+	PPP1R15A	ENST00000200453.5	ENST00000200453.5.1	47.0323	24.9584	6.46341	7.99907	6.05492	7.7803	4.64609	3.56448	2.46115	1.86896
chr19:43596714-43597139:+	SRRM5	ENST00000607544.1	ENST00000607544.1.1	0.0454849	0.0260413	0.0925929	0.0337978	0.0572765	0.10827	0.131509	0.0975776	0.233068	-0.939882
chr15:68278130-68278184:+	FEM1B	ENST00000306917.4	ENST00000306917.4.1	122.715	11.8406	29	22.2858	20.7082	154.742	53.8904	72.6706	2.43848	0.775517
chr21:36699296-36699383:+	SIM2	ENST00000290399.10	ENST00000290399.10.1	5.8455	19.7003	2.8421	3.33093	5.26822	5.71171	3.90825	4.0954	1.12001	0.608627
chr8:55762965-55763007:-	TMEM68	ENST00000334667.6	ENST00000334667.6.1	5.19707	33.7255	4.09302	7.4985	6.57007	7.07466	2.52333	10.4168	1.65057	0.981857
chr15:50908720-50912112:+	AP4E1	ENST00000261842.9	ENST00000261842.9.1	2.34033	4.61353	9.20688	5.90536	7.40233	14.0171	5.19498	13.262	0.61207	-0.482551
chr10:22321234-22321324:+	BMI1	ENST00000376663.7	ENST00000376663.7.1	13.1138	9.23791	19.7727	20.3384	19.625	25.5557	26.5602	14.6176	0.374889	-0.337561
chr4:39366298-39366319:-	RFC1	ENST00000381897.5	ENST00000381897.5.1	101.73	183.328	70.0664	39.0325	141.336	50.3608	83.5402	77.1597	1.28388	0.512137
chr14:57268838-57268874:-	EXOC5	ENST00000621441.4	ENST00000621441.4.1	17.7883	43.0757	8.9655	14.9254	34.7846	36.4093	7.49283	16.5494	0.278301	-0.0767014
chr9:112297861-112333477:-	PTBP3	ENST00000374257.5	ENST00000374257.5.1	12.3062	5.35608	8.88732	13.7195	11.8879	9.99589	15.0808	10.4242	0.322787	-0.202385
chr1:244835527-244835566:+	COX20	ENST00000411948.6	ENST00000411948.6.1	5.19707	19.7003	1	0.518576	1.63404	1.81401	1.59395	1.57361	4.2523	1.90665
chr2:27134485-27134578:-	PREB	ENST00000260643.6	ENST00000260643.6.1	9.48873	19.1234	7.00885	8.71	31.751	26.5778	8.44992	10.7061	0.215728	-0.587823
chr20:10420545-10420737:-	RP5-931K24.3	ENST00000609375.1	ENST00000609375.1.1	0.292163	0.0507606	0.234973	0.321303	0.125304	0.233028	0.177794	0.212772	0.753617	0.427914
chr1:235328581-235328719:+	RP11-293G6.1	ENST00000645655.1	ENST00000645655.1.1	6.55854	6.91182	7.69565	6.16854	10.1224	11.8161	8.9379	8.43422	0.103318	-0.501619
chr3:99817948-99817978:+	CMSS1	ENST00000421999.7	ENST00000421999.7.1	47.1677	80.4763	5.31313	4.87705	12.0586	11.0455	8.94818	8.71067	2.77998	1.62657
chr17:32007988-32017986:+	LRRC37B	ENST00000543378.6	ENST00000543378.6.1	0.691192	1	0.805556	1.31702	0.80599	2.22101	1	0.585065	0.687804	0.125797
chr17:58351501-58352135:-	SUPT4H1	ENST00000577396.5	ENST00000577396.5.1	5.8455	5.06522	4.11111	4.26888	2.61211	3.56977	5.14351	7.18532	0.639744	0.33633
chr2:44169013-44169133:+	PPM1B	ENST00000378551.6	ENST00000378551.6.1	76.5472	94.5015	19.48	24.0731	42.7755	35.1038	18.2943	21.6757	0.659153	0.734869
chr2:44168902-44168929:+	PPM1B	ENST00000378551.6	ENST00000378551.6.2	76.5472	94.5015	22.6511	68.7701	17.8789	45.2583	26.7752	44.7346	1.28617	1.12974
chr19:1911902-1912160:+	ADAT3	ENST00000329478.3	ENST00000329478.3.1	4.23033	15.0252	4.3793	4.36997	1.44825	1.46461	1.95583	2.1144	3.41408	2.1281
chr17:28339417-28339453:+	TNFAIP1	ENST00000226225.6	ENST00000226225.6.1	51.3648	5.94275	4.92	8.40809	5.26026	12.8915	3.87919	9.57531	3.86245	1.62902
chr14:57269195-57269291:+	AP5M1	ENST00000261558.7	ENST00000261558.7.1	8.26825	8.41412	5.47999	7.86751	15.8535	6.4982	4.31405	6.4633	0.321329	0.105646
chr1:179852705-179852780:-	TOR1AIP2	ENST00000367612.7	ENST00000367612.7.1	7.46067	10.0617	7.85999	14.9613	20.0161	19.8468	16.9517	24.2311	0.0879971	-1.02855
chr9:131530631-131531196:-	UCK1	ENST00000372215.4	ENST00000372215.4.1	30.3795	89.8264	5.96063	5.95223	4.43623	6.09825	6.52207	8.95122	5.72458	2.53336
chr3:152269025-152269076:+	MBNL1	ENST00000355460.6	ENST00000355460.6.1	101.73	127.227	32.4999	14.4864	19.5347	18.2256	13.7275	10.7751	2.23927	1.99098
chr7:129054849-129054888:-	TNPO3	ENST00000265388.9	ENST00000265388.9.1	215.05	173.978	33.7209	20.893	72.4826	132.779	35.9542	35.023	0.909834	0.538945
chr2:191013637-191013661:-	STAT1	ENST00000361099.7	ENST00000361099.7.1	30.073	192.678	50.4827	115.188	72.9636	283.776	101.077	101.133	0.280614	-0.551326
chr7:75073752-75073776:-	WBSCR16	ENST00000610322.4	ENST00000610322.4.1	59.7589	5.11895	22.4666	21.4239	61.6391	69.635	16.2055	50.9987	0.503472	-0.489318
chr17:42824188-42824248:-	BECN1	ENST00000361523.8	ENST00000361523.8.1	47.1677	15.8282	15.6363	8.54786	17.1276	62.7715	12.6562	12.9787	0.949326	0.292821
chr11:65041010-65041058:+	SAC3D1	ENST00000531072.1	ENST00000531072.1.1	5.8455	47.7508	20.0909	8.26831	7.66193	9.42957	13.6718	25.5416	1.86905	0.929811
chr7:35694433-35694487:-	HERPUD2	ENST00000396081.5	ENST00000396081.5.1	26.1824	5.11895	6.86046	13.3639	4.93255	7.5035	8.90683	11.4333	1.92885	0.987212
chr13:113491127-113495505:+	TMCO3	ENST00000434316.6	ENST00000434316.6.1	1	33.7255	6.79309	9.2426	11.7787	23.8523	12.5476	24.4581	0.495101	-0.72612
chr12:96400192-96400222:-	CDK17	ENST00000261211.7	ENST00000261211.7.1	10.691	19.1234	14.0278	7.55427	30.1659	53.5034	31.3126	24.3855	0.0502062	-1.44457
chr7:134646838-134661464:+	BPGM	ENST00000344924.7	ENST00000344924.7.1	1.80758	2.80677	4.36	2.67245	4.08724	3.01017	2.73488	3.98506	0.431494	-0.136255
chr10:96832302-96833452:+	LCOR	ENST00000421806.3	ENST00000421806.3.1	13.1138	7.77537	18.907	7.84185	21.2197	12.4698	11.6997	9.4053	0.409555	-0.115862
chr1:156728642-156728873:+	RRNAD1	ENST00000368218.8	ENST00000368218.8.1	2.7871	5.11895	2.75	4.29819	3.59978	3.01154	1.672	3.87106	0.384332	0.386562
chr16:70398784-70398952:-	ST3GAL2	ENST00000393640.8	ENST00000393640.8.1	2.61517	1	0.505051	1.58203	2.25797	1.73301	1.37753	1.87399	0.296503	-0.441211
chr16:70399325-70399433:-	ST3GAL2	ENST00000393640.8	ENST00000393640.8.2	13.5912	1	1	1.96285	3.88852	2.73562	2.96137	2.64439	1.31458	0.304717
chr1:52055508-52055691:-	TXNDC12	ENST00000371626.8	ENST00000371626.8.1	9.93551	52.4258	14.6316	12.4754	52.6743	126.764	25.4258	20.7564	0.164381	-1.16918
chr9:105574979-105575033:+	FKTN	ENST00000223528.6	ENST00000223528.6.1	9.88342	43.0757	6.37209	3.18476	4.89967	2.09983	2.84986	5.25218	8.20526	2.66524
chr12:122483446-122492734:-	ZCCHC8	ENST00000543897.5	ENST00000543897.5.1	6.24973	3.67839	5.82432	6.69062	4.49694	5.98157	6.65042	8.76525	0.291514	-0.134547
chr9:107489437-107489620:-	KLF4	ENST00000374672.4	ENST00000374672.4.1	7.46067	3.47137	7.38596	19.3873	11.2118	11.9891	11.4717	17.2536	0.296149	-0.555076
chr10:100987823-100987892:+	TWNK	ENST00000370228.2	ENST00000370228.2.1	19.5744	38.4006	35.0665	7.79512	12.6043	7.28228	8.70659	7.1954	1.7313	1.57738
chr11:13349986-13350007:+	ARNTL	ENST00000401424.5	ENST00000401424.5.1	1	19.7003	2.93103	4.48726	7.96259	9.92255	9.45321	7.77642	0.731367	-0.415959
chr19:18557906-18562105:+	KXD1	ENST00000222307.8	ENST00000222307.8.1	2.21385	2.52483	2.45201	1.81513	1.33219	1.37398	1.2538	1.28643	0.20506	0.779484
chr13:97275991-97276057:+	MBNL2	ENST00000397601.5	ENST00000397601.5.1	30.3795	61.776	17.4138	33.0283	16.5929	6.20685	15.7931	11.0731	3.52019	1.98815
chr6:133241609-133241675:+	EYA4	ENST00000367895.9	ENST00000367895.9.1	47.1677	61.776	5.15625	7.88198	13.0355	14.6864	8.50733	6.89157	1.54463	1.2592
chr19:41268222-41272087:+	HNRNPUL1	ENST00000352456.7	ENST00000352456.7.1	13.5464	10.8984	9.07045	9.71156	8.29842	5.97382	9.68948	11.3394	0.422494	0.392134
chrX:17746075-17749445:+	SCML1	ENST00000380045.7	ENST00000380045.7.1	6.3613	5.35608	6.78261	6.1299	8.30904	2.74895	5.95387	4.83431	0.427597	0.356479
chr5:176238508-176261111:+	SIMC1	ENST00000443967.5	ENST00000443967.5.1	72.3501	66.4511	22.6363	36.7418	18.6386	55.908	34.8128	19.5577	1.22432	0.925846
chr2:189661520-189666111:+	ASNSD1	ENST00000260952.8	ENST00000260952.8.1	4.39688	1.22703	1.29915	1.0391	1.27368	1.09049	1.04485	1.37077	1.05875	0.717811
chr16:84102015-84102051:-	MBTPS1	ENST00000343411.7	ENST00000343411.7.1	110.124	99.1766	42.6817	48.2365	37.4573	34.2063	21.8513	26.1221	0.511465	1.26891
chr12:56216532-56216574:-	RNF41	ENST00000345093.8	ENST00000345093.8.1	4.23033	6.76654	5.89999	4.04814	3.84017	6.91227	7.69573	7.93008	0.224552	-0.252547
chrX:38327440-38327485:-	RPGR	ENST00000318842.11	ENST00000318842.11.1	13.5912	3.47137	6.72726	11.6761	7.34041	19.3152	7.02433	28.4558	0.643682	-0.234756
chr9:105244803-105244827:+	SLC44A1	ENST00000374724.1	ENST00000374724.1.1	51.3648	117.877	37.3999	10.0993	58.5574	188.374	23.9931	27.0035	0.441487	-0.219394
chr4:41990503-41990632:+	SLC30A9	ENST00000264451.11	ENST00000264451.11.1	14.7289	7.77537	7.25882	10.5037	13.5086	41.2085	6.44017	11.5966	0.378504	-0.272344
chr22:26481762-26481792:-	HPS4	ENST00000398145.6	ENST00000398145.6.1	3.42275	3.71015	8.24136	12.6045	7.02339	7.59705	8.62616	4.95186	0.845292	0.162369
chr17:81395488-81399608:+	BAHCC1	ENST00000584436.7	ENST00000584436.7.1	13.1138	9.23791	8.13999	7.01034	7.33517	10.7123	8.64666	19.7101	0.514164	-0.0191597
chr12:47964211-47964298:+	TMEM106C	ENST00000256686.10	ENST00000256686.10.1	2.90903	38.4006	4.22124	4.49735	3.77855	3.57595	4.14834	3.17047	4.19359	1.80163
chr21:46318040-46322905:-	C21orf58	ENST00000291691.11	ENST00000291691.11.1	0.555091	0.83907	0.573604	0.622698	0.228836	0.287096	0.559747	0.568097	0.826155	0.900953
chr12:111842236-111842371:+	MAPKAPK5	ENST00000550735.6	ENST00000550735.6.1	8.26825	33.7255	2.42187	13.0686	4.31111	7.36393	6.34306	5.90338	1.5023	1.1848
chr4:39527314-39527500:-	UGDH	ENST00000316423.10	ENST00000316423.10.1	93.3354	103.852	9.82608	17.9128	8.14939	22.9845	7.26431	11.9967	4.0965	2.23398
chr7:105532286-105536573:+	RINT1	ENST00000257700.6	ENST00000257700.6.1	7.70163	5.27158	14.72	14.2786	5.9075	15.6624	14.2748	13.6218	0.359174	-0.104819
chr10:28535610-28590796:+	WAC	ENST00000375664.8	ENST00000375664.8.1	1.89882	2.30238	2.03779	1.67494	2.25069	2.11491	2.16406	2.67781	0.168319	-0.192873
chr17:18314780-18314822:-	TOP3A	ENST00000321105.9	ENST00000321105.9.1	23.7855	155.278	47.1362	77.5895	49.7381	55.1314	54.7034	22.0865	1.27868	0.939106
chr22:20917764-20917812:+	CRKL	ENST00000354336.7	ENST00000354336.7.1	21.1896	16.652	11.8889	13.293	31.2224	27.872	23.289	62.376	0.175949	-1.0002
chr6:159790513-159790549:+	MRPL18	ENST00000367034.4	ENST00000367034.4.1	76.5472	145.927	17.2436	26.6305	18.478	39.1163	15.9401	21.4145	1.39577	1.35029
chr14:69398689-69398821:+	SLC39A9	ENST00000556605.5	ENST00000556605.5.1	1.92642	29.0505	3.33333	1.44067	13.2762	6.73779	3.39102	4.23259	1.68379	0.531078
chr2:219245896-219245980:+	STK16	ENST00000409638.7	ENST00000409638.7.1	3.42275	19.7003	2.4	2.2999	3.92475	1.31723	1.45902	2.9473	6.00955	2.19008
chr7:98881102-98881126:+	TRRAP	ENST00000355540.7	ENST00000355540.7.1	496.254	449.807	171.227	204.31	423.741	404.574	208.082	230.482	0.146658	-0.00279474
chr19:49929358-49929397:-	IL4I1	ENST00000595948.5	ENST00000595948.5.1	0.073577	1	0.211268	0.103488	0.277869	0.290527	0.285099	0.117451	1.23932	0.413855
chr3:15096710-15098157:-	RBSN	ENST00000253699.7	ENST00000253699.7.1	55.5619	43.0757	13.3103	14.632	39.9823	12.5708	21.8689	19.4978	1.12615	0.626533
chr6:7389889-7389952:+	RIOK1	ENST00000379834.6	ENST00000379834.6.1	16.3441	220.729	65.9089	30.8976	11.2419	40.713	37.6868	24.0239	1.70776	1.30895
chr20:44521993-44522038:-	SERINC3	ENST00000342374.4	ENST00000342374.4.1	9.93551	113.202	17.52	7.93312	44.0871	34.7	15.4842	15.4177	1.18846	0.359994
chr17:47189181-47189250:-	CDC27	ENST00000066544.7	ENST00000066544.7.1	168.883	150.602	68.4544	26.8584	103.118	105.193	32.4418	62.4649	0.612915	0.487869
chr3:196503548-196503614:-	RNF168	ENST00000318037.3	ENST00000318037.3.1	7.46067	33.7255	14.6818	8.56644	9.55955	26.395	8.15341	9.66797	0.400219	0.246385
chrX:23783277-23783367:+	SAT1	ENST00000379270.4	ENST00000379270.4.1	8.52081	13.2749	5.00872	2.73678	3.97133	2.59092	2.36163	1.62878	1.3728	1.46863
chr11:94494005-94496639:+	ANKRD49	ENST00000544612.5	ENST00000544612.5.1	38.7736	3.25846	5.08333	12.6045	5.5735	4.84828	7.91378	11.7621	2.67336	1.22386
chr5:176361647-176361710:-	KIAA1191	ENST00000298569.8	ENST00000298569.8.1	4.12743	7.59033	8.16278	1.27542	2.16546	2.79761	1.83363	1.34062	1.28506	1.32513
chr5:77077874-77078689:-	ZBED3	ENST00000255198.2	ENST00000255198.2.1	0.519097	0.548308	1.68478	1.63585	0.837514	0.551266	0.956113	0.554992	0.889927	0.660854
chr17:18315568-18315607:+	SMCR8	ENST00000406438.4	ENST00000406438.4.1	51.3648	10.8855	44.7497	55.5765	59.0402	60.7125	43.0019	49.2051	0.373012	-0.313197
chr1:53889352-53889463:-	YIPF1	ENST00000072644.6	ENST00000072644.6.1	21.9853	43.0757	9.44826	20.9597	30.2429	25.8772	25.7168	26.2007	0.476403	-0.168551
chr11:7252173-7303165:+	SYT9	ENST00000318881.10	ENST00000318881.10.1	1.89355	19.7003	2.96875	3.2364	2.52041	2.30925	2.47369	2.82712	3.25177	1.53944
chr16:30700708-30704082:+	SRCAP	ENST00000262518.8	ENST00000262518.8.1	11.744	8.73456	14.2959	11.2249	7.14433	6.23572	7.79517	8.1652	0.188227	0.644598
chr19:36114934-36115024:-	POLR2I	ENST00000221859.8	ENST00000221859.8.1	3.5954	5.51692	5.88679	5.07218	4.61766	13.6523	11.1933	5.84186	0.187018	-0.634369
chr11:95924050-95924092:-	MTMR2	ENST00000346299.9	ENST00000346299.9.1	59.7589	15.8282	26.1363	32.5642	22.1825	55.1314	17.04	31.5625	0.875459	0.471609
chr5:65624828-65624951:+	CTC-534A2.2	ENST00000510585.2	ENST00000510585.2.1	13.5912	1	2.54	1.59088	2.5851	2.12184	1.65533	1	1.81315	1.14635
chr9:34179060-34179147:+	UBAP1	ENST00000297661.8	ENST00000297661.8.1	97.5325	17.4758	16.9535	22.5352	18.4361	66.2033	9.74217	10.6219	1.83172	1.23512
chr5:147671902-147782553:-	JAKMIP2	ENST00000265272.9	ENST00000265272.9.1	26.1824	5.11895	6.0465	10.8692	4.85136	5.71171	3.26819	4.81627	1.68862	1.37851
chr8:123347259-123356434:-	ATAD2	ENST00000521903.5	ENST00000521903.5.1	5.96933	6.35677	6.85789	6.3194	3.61703	4.8889	5.19036	5.44382	0.179597	0.44167
chr7:83648741-83648792:-	SEMA3E	ENST00000643230.1	ENST00000643230.1.1	21.9853	5.94275	7.75861	6.87056	46.0462	9.30158	8.95809	16.4796	0.173824	-0.737343
chrX:153447877-153454493:-	TREX2	ENST00000370232.3	ENST00000370232.3.1	1	0.176209	0.0707969	0.0714571	0.113682	0.0942605	0.07784	0.0876863	3.31601	1.63114
chr5:173328349-173328385:-	STC2	ENST00000265087.8	ENST00000265087.8.1	24.4694	173.978	125.055	50.7374	79.8308	35.3175	138.915	84.0775	1.88352	0.751959
chr9:38392734-38395780:+	ALDH1B1	ENST00000377698.3	ENST00000377698.3.1	10.691	15.8282	16.4	10.7495	16.1112	9.29189	12.3214	14.2453	0.426201	0.154661
chr13:39037785-39037938:-	PROSER1	ENST00000352251.7	ENST00000352251.7.1	3.23388	4.61353	2.75	2.08725	14.7205	13.0946	7.76052	10.5647	0.0727815	-1.83144
chr1:204411486-204411642:-	PPP1R15B	ENST00000367188.4	ENST00000367188.4.1	5.6883	9.64388	5.45293	8.5745	4.5629	4.17698	4.31397	4.77812	0.437769	0.725525
chr1:204411663-204411690:-	PPP1R15B	ENST00000367188.4	ENST00000367188.4.2	244.43	370.331	97.4088	151.858	65.9841	24.2307	114.854	65.7745	5.71755	2.4689
chr14:50668148-50668271:-	SAV1	ENST00000324679.4	ENST00000324679.4.1	1	1	1.49495	3.76228	2.09237	5.76454	2.25087	2.8853	0.413653	-0.610702
chr21:46636928-46644318:+	PRMT2	ENST00000355680.7	ENST00000355680.7.1	21.9853	10.8855	3.82456	4.41222	5.33311	14.462	4.30494	4.77543	1.41627	0.741461
chr3:119498631-119498691:+	TIMMDC1	ENST00000494664.5	ENST00000494664.5.1	2.85285	5.96861	11.3055	4.4468	4.78912	17.3094	5.2035	8.86224	0.738085	-0.146019
chr5:61161109-61161196:-	SMIM15	ENST00000339020.7	ENST00000339020.7.1	3.42275	3.47137	1.76562	1.98616	3.76226	2.83294	5.1856	3.24032	0.330156	-0.373067
chr5:141320513-141320723:-	TAF7	ENST00000313368.7	ENST00000313368.7.1	7.21696	46.3085	22.8053	17.9299	20.1051	16.4959	19.341	30.269	0.95598	0.303839
chr12:124863595-124863901:-	SCARB1	ENST00000339570.9	ENST00000339570.9.1	5.46775	43.0757	11.8889	7.49948	9.47432	7.10981	10.3533	9.72151	2.27237	1.09685
chr19:36236033-36236153:+	ZNF146	ENST00000443387.2	ENST00000443387.2.1	3.27315	6.91182	10.5068	10.7174	4.75487	3.15029	8.34732	10.3279	0.557618	0.372622
chr19:36236265-36236337:+	ZNF146	ENST00000443387.2	ENST00000443387.2.2	5.77258	18.2996	16.9022	12.3127	10.3473	9.31012	9.69401	12.3726	0.566221	0.395657
chr14:92121987-92122041:+	CPSF2	ENST00000298875.8	ENST00000298875.8.1	76.5472	99.1766	23.9444	26.6095	69.2334	110.077	40.2192	54.5367	0.244876	-0.372448
chr1:172442690-172442729:-	PIGC	ENST00000367728.1	ENST00000367728.1.1	21.9853	29.0505	5.10344	4.88022	6.23827	5.01646	10.5792	6.88611	2.18491	1.3932
chr12:49460794-49484661:+	SPATS2	ENST00000553127.5	ENST00000553127.5.1	26.1824	7.59033	5.06	9.14847	8.96182	3.78191	6.29214	8.70807	0.838245	0.761989
chr9:134025862-134025988:+	RP11-374P20.5	ENST00000603928.2	ENST00000603928.2.1	9.39413	1	0.156029	0.315815	0.222855	0.149297	0.252299	0.128779	16.9868	3.69829
chr22:21000770-21002150:-	THAP7	ENST00000399133.2	ENST00000399133.2.1	1.6412	1.76718	1.77778	1.88133	1.04514	1.16974	1.12114	1.15492	0.0423474	0.654375
chr19:11529065-11529122:-	ECSIT	ENST00000270517.11	ENST00000270517.11.1	5.91453	38.4006	9.13952	9.90634	8.26828	10.7681	6.53617	14.5252	1.17595	0.669433
chr2:9423673-9423721:+	CPSF3	ENST00000238112.7	ENST00000238112.7.1	303.189	225.404	100.272	297.273	121.685	119.601	98.8551	132.886	0.558574	0.931231
chr1:1375164-1375296:-	AURKAIP1	ENST00000338338.9	ENST00000338338.9.1	27.6503	21.5948	38.1162	61.2344	48.7709	44.8285	53.954	65.4125	0.171895	-0.571726
chr5:140564843-140566762:+	SLC35A4	ENST00000323146.7	ENST00000323146.7.1	0.822037	2.12651	0.594203	0.28184	0.0766473	0.133215	0.0475446	0.0492333	3.69367	3.48897
chr1:236795320-236803436:+	MTR	ENST00000366577.9	ENST00000366577.9.1	12.3814	22.1581	11.2445	15.4527	12.1883	17.9331	15.2921	16.0878	0.177958	-0.0191443
chr10:114174042-114174087:-	CCDC186	ENST00000369287.7	ENST00000369287.7.1	76.5472	9.58214	35.0665	27.63	18.7531	53.9104	39.2401	31.0264	1.51269	0.595443
chr15:81001167-81001221:+	MESDC1	ENST00000267984.3	ENST00000267984.3.1	21.9853	1	2.13953	0.580674	2.92568	2.15708	1.83445	2.26299	3.00063	1.23283
chr15:81001260-81001410:+	MESDC1	ENST00000267984.3	ENST00000267984.3.2	4.23033	1	0.621622	0.315815	0.92398	0.788516	0.908196	1.65005	1.7159	0.748986
chr12:45990414-45990441:-	SCAF11	ENST00000369367.7	ENST00000369367.7.1	257.021	496.558	48.4035	43.1658	143.965	146.213	96.947	45.2443	1.10402	0.730044
chr12:118016827-118017690:+	RFC5	ENST00000392542.6	ENST00000392542.6.1	32.4958	13.6474	7.04734	10.973	10.9303	15.1337	10.3916	10.0307	0.913329	0.497457
chr18:57621772-57621820:-	NARS	ENST00000256854.9	ENST00000256854.9.1	128.598	477.858	126.125	166.075	211.502	182.064	115.355	137.583	0.751192	0.468098
chr17:15651674-15677212:-	TRIM16	ENST00000578237.5	ENST00000578237.5.1	0.691192	15.0252	1.63636	7.03432	1.92834	1.407	4.23096	2.39316	4.22432	1.84433
chr6:127343373-127343427:-	ECHDC1	ENST00000454859.7	ENST00000454859.7.1	12.3062	26.5375	19.5581	29.1633	47.602	177.392	29.0004	63.3315	0.200539	-1.37425
chr11:7020077-7020116:-	ZNF214	ENST00000278314.4	ENST00000278314.4.1	13.5912	1.82379	1.48276	13.9944	2.39252	8.54985	5.30795	4.58735	2.25997	1.2054
chr22:28883593-28883683:+	ZNRF3	ENST00000544604.6	ENST00000544604.6.1	9.39413	24.3754	8.9655	11.4618	19.1917	7.6532	10.5064	9.20419	1.04049	0.529344
chr13:52024717-52028590:+	UTP14C	ENST00000521776.2	ENST00000521776.2.1	1	0.377703	1.14894	0.751915	0.619898	0.673766	0.728154	0.485323	0.442049	0.406247
chr12:107685781-107685889:+	PWP1	ENST00000412830.7	ENST00000412830.7.1	8.55027	9.08986	10.7559	10.815	14.8222	26.4375	15.0696	15.8578	0.144982	-0.788096
chr1:156194123-156194192:+	SLC25A44	ENST00000359511.4	ENST00000359511.4.1	6.65309	2.35507	4.92	6.73079	3.71614	11.1244	3.59835	6.25584	0.578171	0.15226
chr3:12663905-12663959:-	RAF1	ENST00000251849.8	ENST00000251849.8.1	13.9213	12.5331	9.30231	15.9001	19.625	50.2474	12.732	18.2361	0.234174	-0.643111
chr6:34392524-34392644:-	NUDT3	ENST00000607016.1	ENST00000607016.1.1	1.89355	19.7003	2.4	1.7358	11.1447	20.5362	6.89147	4.09928	0.294257	-1.07331
chr5:5422785-5422881:+	ICE1	ENST00000296564.8	ENST00000296564.8.1	15.5365	5.66723	17.38	13.8593	15.5934	74.6676	24.5034	43.6708	0.353886	-0.930367
chr17:16380933-16380957:+	UBB	ENST00000302182.7	ENST00000302182.7.1	86.6039	304.88	361.265	305.976	560.612	420.36	553.892	932.761	0.233444	-1.10468
chr7:17940324-17940483:-	SNX13	ENST00000428135.7	ENST00000428135.7.1	1.92642	38.4006	3.73437	6.68704	4.12645	9.31436	5.52237	7.01296	1.49259	0.63676
chr17:3668826-3668862:+	TMEM93	ENST00000248378.5	ENST00000248378.5.1	1.47189	4.29516	0.65407	0.501203	5.08059	2.94764	1.09365	1.11677	0.451415	-0.517812
chr17:77088764-77088881:+	SEC14L1	ENST00000392476.6	ENST00000392476.6.1	55.5619	12.5331	3.60177	7.28989	19.2369	22.9902	7.13924	13.2762	1.02006	0.165763
chr5:138542936-138543204:-	ETF1	ENST00000360541.9	ENST00000360541.9.1	17.9593	159.953	18.3521	17.4949	16.9487	60.4573	27.4799	26.7312	0.818173	0.329885
chr12:54183813-54183948:-	SMUG1	ENST00000513838.5	ENST00000513838.5.1	2.61517	1.93345	2.30232	2.59424	2.62486	3.24367	2.52038	3.39003	0.152436	-0.290218
chr6:35281122-35281179:+	ZNF76	ENST00000373953.7	ENST00000373953.7.1	4.5742	5.11895	7.71999	7.25851	13.9978	9.75032	7.67366	7.66231	0.284925	-0.511936
chr22:41092589-41092703:+	EP300	ENST00000263253.8	ENST00000263253.8.1	78.528	49.7827	42.4531	49.3178	72.0095	79.9814	41.0344	42.9282	0.207014	-0.0378707
chr9:93453254-93453491:-	FAM120AOS	ENST00000375412.9	ENST00000375412.9.1	5.19707	0.176209	0.517242	0.675026	1	1.70947	1.91059	2.37419	2.15659	0.549715
chr6:152975614-152983469:-	FBXO5	ENST00000367241.3	ENST00000367241.3.1	12.6451	4.43871	6.4416	8.06366	4.07017	5.92929	8.54507	5.42232	0.961887	0.607943
chr5:62306472-62308343:+	KIF2A	ENST00000381103.6	ENST00000381103.6.1	80.7443	141.252	24.3333	22.1233	89.1928	33.78	35.101	46.1842	1.51829	0.645949
chr17:30832278-30832320:+	ATAD5	ENST00000321990.4	ENST00000321990.4.1	13.9565	16.8092	12.6941	23.9326	13.89	58.8539	16.7431	19.0351	0.358676	-0.274979
chr14:77028549-77028597:-	IRF2BPL	ENST00000238647.4	ENST00000238647.4.1	6.80808	14.1807	7.38596	8.4744	43.4473	29.8972	55.9458	20.3417	0.152176	-1.76166
chr1:227563694-227650975:+	ZNF678	ENST00000608949.5	ENST00000608949.5.1	1	0.195352	0.820513	0.461795	0.11867	0.446634	0.529973	0.493489	3.25112	1.50438
chr2:113756463-113756490:-	SLC35F5	ENST00000245680.6	ENST00000245680.6.1	26.1824	29.0505	11.6207	6.43231	98.0225	136.211	41.2326	30.7037	0.0319963	-2.0414
chr10:18651382-18651448:-	NSUN6	ENST00000377304.6	ENST00000377304.6.1	34.5765	19.7003	5.27777	17.2463	6.38935	11.9816	12.6232	14.901	1.92862	1.10958
chr10:68721250-68722467:+	CCAR1	ENST00000265872.10	ENST00000265872.10.1	29.5936	61.9605	31.6923	22.4523	34.3174	61.7095	35.6718	35.7315	0.136401	-0.241603
chr5:180851346-180851466:-	ZFP62	ENST00000512132.5	ENST00000512132.5.1	17.7883	6.76654	12.6666	6.43231	4.36994	4.11527	11.3707	7.5011	1.27276	0.942295
chr12:107760610-107761008:-	PRDM4	ENST00000228437.9	ENST00000228437.9.1	4.5742	2.80677	7.57999	7.20836	10.6284	6.73023	11.182	10.4702	0.129871	-0.853506
chr11:83285968-83286172:-	CCDC90B	ENST00000529689.5	ENST00000529689.5.1	21.9853	38.4006	5.72092	3.59979	49.5112	14.462	8.21222	5.60452	0.897353	0.149993
chr19:56601558-56621291:+	ZNF71	ENST00000328070.10	ENST00000328070.10.1	38.7736	29.0505	4.28125	4.49438	5.09208	3.54795	8.62616	3.63458	3.53294	2.13219
chr3:88058138-88058216:-	CGGBP1	ENST00000462901.5	ENST00000462901.5.1	2.61517	2.80677	5.8125	3.5847	8.2875	4.96871	4.47963	5.27979	0.361504	-0.485533
chr5:138021109-138021157:-	FAM13B	ENST00000033079.7	ENST00000033079.7.1	51.3648	14.1807	14.0454	16.7149	4.85136	9.52595	12.7019	5.82908	3.85238	2.00447
chr1:158076215-158078060:+	KIRREL	ENST00000360089.8	ENST00000360089.8.1	13.5912	5.11895	10.5454	6.82033	6.05492	9.24632	4.18414	5.61321	0.790762	0.707891
chr18:2571272-2571296:-	METTL4	ENST00000319888.10	ENST00000319888.10.1	5.19707	5.67508	12.2	7.73994	21.7905	21.5905	8.51598	13.2708	0.483326	-0.668193
chr10:92291216-92311190:+	MARCH5	ENST00000358935.2	ENST00000358935.2.1	7.25485	2.44837	3.2037	3.32007	3.88882	3.46221	3.27324	3.9527	0.453518	0.134695
chr7:64679198-64691247:+	ZNF107	ENST00000344930.7	ENST00000344930.7.1	10.691	29.0505	6.2093	6.03709	13.0468	11.7696	6.0067	6.84636	0.678521	0.379404
chr9:128702572-128702839:+	PKN3	ENST00000291906.4	ENST00000291906.4.1	51.3648	3.25846	20.409	14.7206	10.7005	19.8025	10.6478	18.973	1.78089	0.93685
chr12:120687179-120687227:+	MLEC	ENST00000228506.7	ENST00000228506.7.1	7.25485	13.3569	11.7187	9.21022	12.8476	22.0541	6.98333	14.729	0.467973	-0.20351
chr19:55599465-55599495:-	FIZ1	ENST00000590714.1	ENST00000590714.1.1	5.19707	1.82379	3.86363	3.21916	5.17755	3.7454	3.76551	3.94902	0.215932	-0.263634
chr9:128886027-128886105:+	LRRC8A	ENST00000372600.8	ENST00000372600.8.1	13.1138	71.1261	9.8421	8.48068	17.0861	15.4831	12.8073	11.8993	1.66476	0.774521
chr2:218737595-218737664:+	TTLL4	ENST00000392102.5	ENST00000392102.5.1	8.1484	75.8012	15.1944	20.257	17.2486	20.9687	19.7011	27.4772	1.28463	0.48436
chr10:99659877-99659928:+	ENTPD7	ENST00000370489.4	ENST00000370489.4.1	26.1824	33.7255	7.03447	2.52407	12.7948	7.34972	6.94421	5.00652	1.57396	1.02718
chr1:241848840-241848906:+	EXO1	ENST00000366548.7	ENST00000366548.7.1	9.029	24.0661	52.7998	25.0574	8.97893	11.0345	15.9387	20.0192	0.906811	0.954364
chr1:240091945-240092071:+	FMN2	ENST00000319653.13	ENST00000319653.13.1	17.7883	19.7003	2.38028	11.7788	15.8535	22.9632	6.28485	7.29317	0.446979	-0.00950885
chr19:36589619-36589691:-	ZNF529	ENST00000586115.5	ENST00000586115.5.1	17.7883	15.0252	3.17241	3.13412	2.16406	4.47124	3.24821	3.74838	2.98613	1.74341
chr16:67893275-67908685:+	PSKH1	ENST00000291041.5	ENST00000291041.5.1	17.7883	1	1.84	0.5076	1.1793	1.80462	0.911205	1.83758	6.15585	2.16458
chr8:109540190-109540424:+	EBAG9	ENST00000337573.9	ENST00000337573.9.1	17.7883	19.7003	3.52777	5.33282	4.49218	12.8031	3.78736	5.16044	1.23063	0.899834
chr18:59139642-59139930:+	SEC11C	ENST00000587834.5	ENST00000587834.5.1	42.9707	57.1009	38.5454	59.4865	26.8033	52.6894	70.7935	35.7509	0.45242	0.291398
chr11:64234537-64234792:+	VEGFB	ENST00000309422.6	ENST00000309422.6.1	1	3.47137	0.461539	0.5076	0.543878	0.702757	0.467228	0.563003	1.64219	1.11565
chr2:55419163-55419202:-	CCDC88A	ENST00000263630.13	ENST00000263630.13.1	89.1384	89.8264	26.4545	24.1083	21.5651	55.3827	51.8434	49.6588	1.48473	0.755131
chr9:96777684-96777828:-	ZNF510	ENST00000375231.5	ENST00000375231.5.1	93.3354	15.8282	15.2414	70.3035	15.7266	33.2585	14.1646	17.5915	2.21429	1.52146
chr14:20329246-20329366:-	CCNB1IP1	ENST00000358932.8	ENST00000358932.8.1	1.96181	1.41586	1.08861	0.704867	0.50635	1.32111	0.247759	0.314819	1.31913	1.53343
chr15:77252443-77252497:-	PEAK1	ENST00000560626.6	ENST00000560626.6.1	72.3501	47.7508	15.3181	24.2089	20.9723	36.8163	14.0731	27.4701	1.0328	0.747721
chrX:13735071-13740108:+	OFD1	ENST00000380567.5	ENST00000380567.5.1	3.77927	14.0991	5.95283	9.33666	8.35802	5.57419	6.59308	8.84111	0.779498	0.304645
chrX:38033670-38033766:+	SYTL5	ENST00000297875.6	ENST00000297875.6.1	9.39413	29.0505	4.4186	8.29154	9.3551	9.38882	4.63408	7.9739	0.907674	0.606836
chr8:17247067-17247109:+	VPS37A	ENST00000324849.8	ENST00000324849.8.1	13.5912	24.3754	8.95452	9.8194	8.89093	30.5131	16.5856	16.022	0.391784	-0.200799
chr16:53951-55489:+	SNRNP25	ENST00000293861.7	ENST00000293861.7.1	1.1909	1.45169	1	0.900766	0.880736	0.817707	0.957011	0.922541	0.315349	0.364238
chr12:120534696-120534957:+	RNF10	ENST00000325954.8	ENST00000325954.8.1	11.4986	11.7093	12.8276	9.7305	5.03429	10.3872	7.27204	8.56956	0.482718	0.657815
chr19:57559747-57559786:-	ZNF550	ENST00000601415.5	ENST00000601415.5.1	5.19707	10.3502	1.77778	2.68498	3.59882	1.81401	2.05665	1.1548	1.87539	1.37006
chr17:49707822-49708086:-	SLC35B1	ENST00000240333.10	ENST00000240333.10.1	5.95486	21.5948	7.8761	12.3607	15.5286	21.92	17.5702	33.0292	0.254126	-0.868318
chr16:47143754-47143856:-	NETO2	ENST00000562435.5	ENST00000562435.5.1	5.03792	19.7003	3.52777	1.49054	7.86748	5.31428	3.72306	7.00978	1.3704	0.461419
chr3:186570661-186570862:+	DNAJB11	ENST00000439351.5	ENST00000439351.5.1	189.868	272.154	16.7376	13.6837	27.9727	29.4446	15.4108	33.3022	3.74327	2.13155
chr20:325669-325732:+	SOX12	ENST00000342665.4	ENST00000342665.4.1	26.1824	61.776	4.41025	5.78273	3.42058	14.8849	7.07666	4.71899	2.78843	1.77117
chr5:77030624-77030723:+	AGGF1	ENST00000312916.11	ENST00000312916.11.1	9.07584	7.59033	7.01999	7.70921	7.62221	22.406	3.98878	8.17977	0.51014	0.081299
chr9:38068784-38068904:-	SHB	ENST00000377707.3	ENST00000377707.3.1	2.34033	47.7508	7.51162	6.82033	25.2556	15.6521	7.86103	11.4205	1.12604	0.231484
chr4:104491977-104492040:-	CXXC4	ENST00000394767.2	ENST00000394767.2.1	21.9853	5.11895	3.60465	14.4612	18.3254	8.81028	7.91378	9.51378	0.438034	-0.0907065
chr4:82900166-82900435:-	SEC31A	ENST00000355196.6	ENST00000355196.6.1	9.20883	30.3599	15.4179	5.85937	61.4183	97.0375	54.7246	37.2695	0.0727465	-2.14919
chr12:14803426-14803465:-	WBP11	ENST00000261167.6	ENST00000261167.6.1	30.8806	23.2424	23.3023	20.8481	39.0424	49.8404	27.6428	23.0503	0.169293	-0.412767
chr15:89088485-89088539:+	ABHD2	ENST00000352732.9	ENST00000352732.9.1	10.691	80.4763	22.7777	18.8736	77.5885	135.525	44.5943	29.9184	0.195711	-1.09448
chr15:22838747-22838861:+	NIPA2	ENST00000337451.7	ENST00000337451.7.1	6.65309	0.176209	3.94737	5.05348	11.1098	7.02729	7.41349	3.51045	0.507532	-0.623748
chr7:72879425-72879524:+	POM121	ENST00000395270.5	ENST00000395270.5.1	1.89355	3.47137	6.0909	2.95685	4.85136	3.01154	9.3585	13.4273	0.352211	-0.728541
chr1:168178961-168179081:+	TIPRL	ENST00000367833.6	ENST00000367833.6.1	13.9213	23.2424	12.0353	24.8634	14.3955	25.9551	24.6536	34.7179	0.184974	-0.38323
chr16:689833-689917:-	WDR24	ENST00000293883.8	ENST00000293883.8.1	59.7589	38.4006	6.2093	3.06808	5.65624	10.2566	12.7898	16.0132	4.17628	1.90556
chr16:57204541-57204658:+	RSPRY1	ENST00000394420.8	ENST00000394420.8.1	51.3648	3.71015	5.21795	5.26027	8.95441	4.19537	5.13749	9.46947	2.13604	1.03417
chr17:59699157-59699898:-	PTRH2	ENST00000409433.2	ENST00000409433.2.1	1.75772	3.49334	5.75373	5.80245	14.4184	28.1212	36.4503	27.4267	0.0362098	-2.70006
chr12:110583230-110583302:-	PPTC7	ENST00000354300.4	ENST00000354300.4.1	21.9853	1	3.65517	6.70642	13.9968	9.67809	5.07953	13.2289	0.536032	-0.463648
chr22:40400700-40400757:+	SGSM3	ENST00000248929.13	ENST00000248929.13.1	9.07584	85.1514	14.2222	8.53741	10.1759	13.2348	9.32309	9.14148	2.31583	1.2906
chr14:28767104-28767299:+	FOXG1	ENST00000313071.6	ENST00000313071.6.1	7.46067	61.776	8.72412	9.66563	9.24253	11.4137	6.74751	24.6986	2.00953	0.98257
chr16:70523834-70523873:+	SF3B3	ENST00000302516.9	ENST00000302516.9.1	65.8851	1249.25	178.442	229.933	555.686	518.214	377.974	353.241	0.885611	-0.131209
chr2:37316836-37316893:-	PRKD3	ENST00000379066.5	ENST00000379066.5.1	84.9413	52.4258	23.909	44.6328	20.979	24.8227	35.6796	40.9522	1.3044	0.98566
chr2:175118339-175136443:-	ATF2	ENST00000345739.9	ENST00000345739.9.1	5.02098	8.67876	1.95789	3.04562	3.89663	3.92147	2.95949	2.88268	0.57025	0.383987
chr9:35732635-35732824:+	CREB3	ENST00000353704.2	ENST00000353704.2.1	2.88757	43.0757	2.68518	5.84116	2.982	4.36418	2.77316	4.73579	3.81794	1.70491
chr17:80013492-80013576:-	TBC1D16	ENST00000310924.6	ENST00000310924.6.1	13.5912	15.0252	9.27271	7.4985	10.1936	6.20685	7.39745	5.55647	0.48143	0.668361
chr15:70097054-70097132:-	TLE3	ENST00000558939.5	ENST00000558939.5.1	19.5285	11.579	21.9239	17.233	30.4454	17.6268	18.9727	22.2493	0.207656	-0.309175
chrX:129841979-129842060:-	ZDHHC9	ENST00000357166.10	ENST00000357166.10.1	4.23033	3.71015	5.70312	4.63416	22.2404	5.33492	4.69602	5.88403	0.364116	-0.470081
chr9:136116980-136118602:-	C9orf69	ENST00000418388.5	ENST00000418388.5.1	0.764054	1	0.416667	0.72045	0.243655	0.584976	0.292004	0.645211	0.772958	0.885342
chr3:28348696-28348783:-	AZI2	ENST00000479665.5	ENST00000479665.5.1	17.7883	2.80677	2.41414	2.52407	4.35459	4.48949	2.07693	2.36681	1.37193	0.794714
chr16:28491769-28491796:-	CLN3	ENST00000569430.6	ENST00000569430.6.1	72.3501	43.0757	13.25	8.63688	11.6706	10.2923	6.5808	9.88402	2.04514	1.7303
chr6:24719329-24719554:-	C6orf62	ENST00000378119.8	ENST00000378119.8.2	1.80758	1.82379	1.38889	3.16641	2.55208	0.741217	0.705704	0.811036	1.14417	1.17649
chr7:35253937-35253970:-	TBX20	ENST00000408931.3	ENST00000408931.3.1	13.5912	15.0252	8.46664	19.1922	13.9941	5.04977	16.0778	18.6295	0.943804	0.460335
chr9:128127843-128128413:-	PTGES2	ENST00000338961.10	ENST00000338961.10.1	5.8455	29.0505	8.36841	8.23541	13.5114	10.9236	15.0002	10.8729	0.906699	0.139919
chr19:39168229-39168271:+	PAK4	ENST00000599386.5	ENST00000599386.5.1	6.42675	6.87199	9.0566	6.01133	16.0614	10.834	5.10692	4.48047	0.548377	0.0529394
chr3:94063014-94064501:+	NSUN3	ENST00000314622.8	ENST00000314622.8.1	2.7871	24.3754	1.39623	4.80166	4.07504	3.3518	3.85071	4.19608	2.84637	1.24232
chr10:98443214-98445396:-	HPS1	ENST00000325103.10	ENST00000325103.10.1	5.19707	1	6.44444	3.71616	7.01431	2.74333	6.89147	6.5627	0.210991	-0.617703
chr5:90529456-90529525:-	LYSMD3	ENST00000315948.10	ENST00000315948.10.1	59.7589	6.4203	15.1628	26.5155	7.97445	17.1991	11.7582	14.9316	2.79433	1.45054
chr19:40800522-40800603:+	EGLN2	ENST00000303961.8	ENST00000303961.8.1	7.70163	57.1009	2.47368	2.36541	4.52846	7.38526	4.81098	3.7981	2.97474	1.40182
chr11:124623042-124623087:+	TBRG1	ENST00000441174.7	ENST00000441174.7.1	5.8455	5.11895	4.71875	7.33579	3.65572	16.8731	3.94526	5.56093	0.484972	0.143263
chr6:53065601-53065673:+	FBXO9	ENST00000323557.11	ENST00000323557.11.1	6.24973	3.61041	2.56081	1.19259	4.11992	2.62521	2.06217	1.11006	0.163573	0.380835
chr11:61364355-61366169:+	TMEM138	ENST00000278826.10	ENST00000278826.10.1	1.89355	2.24459	2.16667	2.72778	1.43332	1.53155	1.25598	1.57202	0.176017	0.643153
chr2:112646592-112646670:+	SLC20A1	ENST00000272542.7	ENST00000272542.7.1	17.9593	20.771	12.7935	8.75255	19.2188	26.3781	8.05322	12.7658	0.351701	-0.00139296
chr1:165827833-165885147:+	UCK2	ENST00000642653.1	ENST00000642653.1.1	47.1677	75.8012	15	15.1173	11.2281	15.6906	17.7211	16.8412	1.83561	1.42975
chr4:183099457-183099499:+	WWC2	ENST00000403733.7	ENST00000403733.7.1	21.9853	52.4258	15.3181	19.5671	38.2497	56.5944	35.3411	45.7962	0.202702	-0.760095
chr22:50294745-50307627:-	PLXNB2	ENST00000449103.5	ENST00000449103.5.1	13.2692	57.8416	12.5294	24.3383	41.2908	24.7744	23.4428	28.0543	0.786682	0.0208031
chr3:50613894-50617683:+	MAPKAPK3	ENST00000446044.5	ENST00000446044.5.1	1.80758	2.64758	2.28169	7.34047	2.55208	2.53719	2.04534	3.85539	0.438392	0.25438
chr7:99408834-99408885:+	BUD31	ENST00000403633.6	ENST00000403633.6.1	68.1531	18.2996	12.4844	5.87489	27.7188	28.5971	7.82874	5.15616	0.669126	0.544167
chr8:120811833-120813121:-	SNTB1	ENST00000395601.7	ENST00000395601.7.1	9.39413	19.7003	4.31579	18.1746	9.55955	16.0997	8.66491	10.3367	0.453784	0.157908
chr7:103344697-103344754:-	DNAJC2	ENST00000379263.7	ENST00000379263.7.1	101.73	131.902	16.54	45.3833	17.3683	60.0155	32.7567	46.9744	2.09994	1.25188
chr9:135484056-135484455:+	PPP1R26	ENST00000605286.5	ENST00000605286.5.1	5.91453	4.29516	15	5.46226	24.3894	6.83354	11.8892	7.6317	0.363839	-0.489836
chr6:35411046-35421847:+	PPARD	ENST00000311565.4	ENST00000311565.4.1	3.42275	15.0252	2.20312	1.53791	2.6773	3.93202	1.79178	1.64261	1.16488	0.861065
chr8:43097556-43102538:+	POMK	ENST00000331373.9	ENST00000331373.9.1	4.39688	6.4203	8.30434	5.72184	12.3217	6.03874	6.38692	3.70081	0.443923	0.0929989
chr16:75644452-75647639:-	KARS	ENST00000319410.9	ENST00000319410.9.1	46.2247	39.7182	15.5355	28.7148	18.9571	47.4761	18.0474	45.9082	0.72636	0.251348
chr14:24141267-24141547:-	EMC9	ENST00000216799.8	ENST00000216799.8.1	2.65162	1.93345	2.73759	2.7366	3.94941	6.4982	2.18991	2.71559	0.358667	-0.309914
chr7:66205482-66240404:+	TPST1	ENST00000304842.5	ENST00000304842.5.1	9.39413	5.94275	8.24136	6.53638	4.49437	4.80671	5.30173	8.24251	0.472782	0.504371
chr7:108569625-108569682:-	THAP5	ENST00000415914.3	ENST00000415914.3.1	5.91453	3.71015	17.8636	16.6463	11.1447	19.8468	10.7353	20.9729	0.546527	-0.333079
chr1:93180446-93180557:-	TMED5	ENST00000370282.7	ENST00000370282.7.1	59.7589	75.8012	24.6551	21.3712	100.621	159.547	112.648	77.4555	0.150926	-1.35496
chr2:241315603-241315645:-	HDLBP	ENST00000310931.8	ENST00000310931.8.1	61.7614	120.45	55.0909	48.2472	134.916	153.655	76.4746	101.773	0.144974	-0.715412
chr1:173811305-173823975:-	CENPL	ENST00000356198.6	ENST00000356198.6.1	34.5765	5.94275	6.05555	3.06808	8.92551	3.64355	4.69953	6.79188	1.26575	0.857026
chr11:73981511-73983034:-	UCP2	ENST00000310473.7	ENST00000310473.7.1	1.44678	0.688852	1.58333	1.10924	0.462094	0.365548	0.305207	0.659865	1.39501	1.57096
chr7:27179663-27179858:-	HOXA10-HOXA9	ENST00000470747.4	ENST00000470747.4.1	2.65162	52.4258	6.0465	3.462	1.63585	3.24666	2.3952	2.58931	6.21628	2.43496
chr1:231241225-231241339:+	GNPAT	ENST00000366647.8	ENST00000366647.8.1	7.48496	19.9472	8.08235	15.956	7.99501	5.94746	7.35509	5.97423	1.02784	1.01074
chr12:29371657-29381143:-	ERGIC2	ENST00000360150.8	ENST00000360150.8.1	47.1677	57.1009	12.8276	9.7305	13.9987	24.3342	14.0616	14.9695	1.1035	0.863589
chr13:32522224-32538637:-	N4BP2L2	ENST00000504114.5	ENST00000504114.5.1	0.308241	0.851587	0.301109	0.263774	0.302844	0.31758	0.368189	0.410061	0.814182	0.367477
chr3:52700483-52704854:-	GLT8D1	ENST00000478968.6	ENST00000478968.6.1	30.3795	43.0757	11.8182	14.9254	21.8878	19.1737	10.675	13.6848	0.47034	0.544066
chrX:135973623-135973947:-	MMGT1	ENST00000305963.2	ENST00000305963.2.1	1.89355	6.76654	2.04054	1.76734	4.95306	7.19798	2.88092	3.78416	0.217977	-0.679405
chr6:95586431-95586506:+	MANEA	ENST00000358812.8	ENST00000358812.8.1	63.956	11.3889	23.3023	18.2236	11.2202	9.01604	22.0365	15.1517	1.96108	1.2053
chr2:207769431-207769509:-	FZD5	ENST00000295417.3	ENST00000295417.3.1	17.7883	15.0252	14.9999	11.3955	9.66557	11.5821	5.26497	8.78484	0.633607	0.864699
chr19:38081398-38081497:+	SIPA1L3	ENST00000222345.10	ENST00000222345.10.1	13.1138	14.1807	6.55434	10.9334	6.07603	5.80057	9.39199	10.4104	0.731554	0.667002
chr20:408240-408705:+	RBCK1	ENST00000356286.9	ENST00000356286.9.1	1.13815	1.23731	1.98823	3.06808	1.60591	1	1.48207	1.40737	0.527206	0.450902
chr11:117229843-117232337:-	PCSK7	ENST00000320934.7	ENST00000320934.7.1	4.23033	47.7508	2.4	6.04429	2.4716	3.22058	3.81568	3.24856	5.83318	2.25005
chr3:23945457-23945511:+	NR1D2	ENST00000312521.8	ENST00000312521.8.1	55.5619	66.4511	15.9655	32.5642	29.8489	108.757	82.8511	87.9914	0.653687	-0.398194
chr7:150368902-150388451:+	RP11-511P7.7	ENST00000478789.5	ENST00000478789.5.1	0.1572	0.0966169	0.0402195	0.100547	0.0816154	0.199081	0.0666657	0.0828518	0.57283	0.0800783
chr10:112445458-112445542:-	ZDHHC6	ENST00000626395.2	ENST00000626395.2.1	30.3795	24.3754	6.79309	8.76045	6.29563	4.54736	3.32493	7.97666	1.80247	1.7363
chr14:57268708-57268816:-	EXOC5	ENST00000621441.4	ENST00000621441.4.2	3.42275	7.59033	8.9655	6.2383	6.52453	36.4093	8.03636	9.17229	0.326769	-0.66154
chrX:154379382-154379442:+	EMD	ENST00000369842.8	ENST00000369842.8.1	19.5744	127.227	32.1817	10.6445	15.0752	44.9759	13.4669	26.679	0.948727	0.789917
chr17:68248451-68248553:+	AMZ2	ENST00000359904.7	ENST00000359904.7.1	42.9707	47.7508	35.9997	33.9192	14.5807	36.8163	39.5678	12.6927	0.869504	0.968321
chr12:46268860-46268905:-	SLC38A1	ENST00000398637.9	ENST00000398637.9.1	14.85	145.927	91.3634	52.995	30.735	99.9018	69.2395	130.489	0.476144	-0.124406
chr16:58599326-58599386:-	CNOT1	ENST00000317147.9	ENST00000317147.9.1	95.4873	100.679	33.4403	51.0975	55.2192	98.7056	37.1157	28.4899	0.403299	0.444598
chr16:29862928-29863342:-	CDIPT	ENST00000219789.10	ENST00000219789.10.1	9.93551	6.28952	2.61274	4.42358	5.23505	7.92715	2.78677	4.71651	0.440548	0.191165
chr3:66500784-66500820:-	LRIG1	ENST00000383703.3	ENST00000383703.3.1	38.7736	43.0757	17.3333	7.25851	20.3382	14.3064	21.2694	26.5599	1.05146	0.586309
chr1:52142373-52216464:+	ZFYVE9	ENST00000357206.6	ENST00000357206.6.1	13.5912	10.3502	9.59089	9.18421	5.7515	4.94969	9.86887	11.5633	0.681757	0.636967
chr19:42325917-42325989:+	MEGF8	ENST00000334370.8	ENST00000334370.8.1	51.3648	43.0757	16.3999	11.6761	21.0565	24.7673	20.4881	26.4345	0.785037	0.438493
chr19:49877134-49877185:-	AKT1S1	ENST00000391835.1	ENST00000391835.1.1	7.46067	61.776	14.2222	7.77274	28.2638	21.2489	14.2748	17.9389	1.05004	0.201895
chr6:21593910-21594057:+	SOX4	ENST00000244745.3	ENST00000244745.3.1	6.03996	7.54289	8.56757	7.63894	7.37957	4.98971	9.298	7.4502	0.265716	0.0965773
chr3:152299842-152299980:+	MBNL1	ENST00000355460.6	ENST00000355460.6.2	101.73	22.4186	32.4999	17.2969	15.7448	22.3149	13.7275	23.3042	2.28864	1.40266
chr1:11982068-11982092:+	MFN2	ENST00000235329.9	ENST00000235329.9.1	21.9972	6.93275	15.5326	21.8478	21.2611	13.1049	32.4556	17.9526	0.31811	-0.295487
chr2:111121152-111123765:+	BCL2L11	ENST00000393256.7	ENST00000393256.7.1	2.17973	5.94275	2.0566	2.38574	2.61372	1.84104	1.36542	1.87767	0.909141	0.773716
chr5:112976904-112985968:+	DCP2	ENST00000389063.2	ENST00000389063.2.1	72.3501	2.66346	2.94444	3.07054	1.92856	2.21342	2.04352	1.79262	15.6166	3.38792
chr18:74148596-74148623:+	TIMM21	ENST00000169551.10	ENST00000169551.10.1	34.5765	15.0252	13.5517	18.7533	13.2762	8.33122	13.5168	9.88402	0.567781	0.869437
chr17:4999896-5000223:+	KIF1C	ENST00000320785.9	ENST00000320785.9.1	76.5472	43.0757	31.3332	13.0469	14.3867	23.2738	12.3699	14.8312	1.65219	1.40385
chr15:66703084-66703195:+	SMAD6	ENST00000288840.9	ENST00000288840.9.1	17.7883	5.67508	1.58333	4.80428	1.81243	4.25603	3.06321	3.09422	3.77843	1.72438
chr17:44324716-44324764:-	SLC25A39	ENST00000225308.12	ENST00000225308.12.1	17.9593	6.76654	4.69811	1.81018	13.5069	20.204	5.19036	3.40744	0.380018	-0.36729
chr1:154272679-154272727:+	HAX1	ENST00000328703.11	ENST00000328703.11.1	9.93551	71.1261	5.52941	10.3271	3.88882	3.9799	4.47495	6.78652	6.98901	2.53503
chr17:19867473-19867560:-	ULK2	ENST00000361658.6	ENST00000361658.6.1	84.9413	52.4258	28.9998	28.7214	17.2968	57.2807	29.8368	29.6373	1.71432	0.957373
chr1:113759066-113759126:-	PHTF1	ENST00000369604.5	ENST00000369604.5.1	30.3795	4.29516	5.39534	5.57353	13.6808	12.2815	4.71985	6.67077	0.686457	0.185533
chr4:17804650-17804689:-	DCAF16	ENST00000382247.5	ENST00000382247.5.1	17.7883	5.11895	10.2272	6.77709	11.4617	23.563	25.8665	30.4788	0.556149	-0.744824
chr1:179082103-179082193:+	TOR3A	ENST00000352445.10	ENST00000352445.10.1	59.7589	5.51692	10.5454	7.33699	6.21943	3.96453	10.7353	10.9475	3.72998	1.66135
chr13:39601049-39601355:-	LHFP	ENST00000379589.3	ENST00000379589.3.1	9.39413	5.67508	1.36842	1.16249	0.92935	1.04263	1.42042	1.64695	3.84361	2.10606
chr1:203802093-203802192:+	ZC3H11A	ENST00000639812.1	ENST00000639812.1.1	4.12743	10.8855	11.5	3.8363	5.91568	2.63117	3.98716	1.9367	1.25729	1.27797
chr22:37608501-37608630:+	GGA1	ENST00000343632.8	ENST00000343632.8.1	8.1484	131.902	19.6666	22.4234	16.5208	21.8274	21.5405	19.6721	2.26111	1.1025
chr1:113905495-113905570:+	DCLRE1B	ENST00000369563.3	ENST00000369563.3.1	2.65162	57.1009	7.23437	12.8347	4.40674	7.83923	8.89102	6.96613	2.72455	1.39805
chr13:102799221-102799323:+	BIVM-ERCC5	ENST00000639435.1	ENST00000639435.1.1	11.2758	19.9472	10.5789	27.3129	8.84855	27.0343	13.4359	11.1457	0.689666	0.392332
chr18:50663190-50663238:+	MAPK4	ENST00000400384.6	ENST00000400384.6.1	13.5912	5.67508	1.95454	3.59888	6.07233	3.02489	6.28325	5.02922	0.795427	0.362053
chr10:91222719-91222824:+	PCGF5	ENST00000336126.5	ENST00000336126.5.1	17.7883	2.64758	3.38	3.45268	4.93255	6.6734	4.21886	5.41829	1.30465	0.443986
chr13:106535381-106535444:-	EFNB2	ENST00000646441.1	ENST00000646441.1.1	3.68065	9.23791	8.41999	25.6015	20.0161	14.5444	15.0002	19.5392	0.405969	-0.572056
chr2:65431995-65432040:-	SPRED2	ENST00000356388.8	ENST00000356388.8.1	38.7736	2.64758	4.62068	8.29154	9.81928	7.10505	5.24248	8.37254	1.40538	0.630655
chr11:68263865-68268196:-	C11orf24	ENST00000304271.10	ENST00000304271.10.1	1	0.28807	1.23333	1.32994	1.20883	5.96179	2.41868	1.95206	0.292813	-0.952612
chr10:100912983-100913136:+	SLF2	ENST00000238961.8	ENST00000238961.8.1	34.1109	15.0024	17.7344	55.211	7.3027	27.6997	20.2851	17.874	1.68586	1.19783
chr19:38893847-38899521:-	SIRT2	ENST00000392081.6	ENST00000392081.6.1	6.86735	6.4203	14.8906	11.7343	13.0132	9.89358	14.8077	17.3559	0.177059	-0.484814
chr12:56216458-56216524:-	RNF41	ENST00000345093.8	ENST00000345093.8.2	21.9853	3.71015	13.4091	10.8692	16.3177	40.122	16.7688	11.1123	0.45602	-0.314028
chr17:76729705-76729792:+	METTL23	ENST00000588783.5	ENST00000588783.5.1	3.16165	2.80677	1.55118	2.3164	1.991	2.33682	1.48455	1.6397	0.206124	0.391399
chr1:211829298-211830631:-	LPGAT1	ENST00000366997.8	ENST00000366997.8.1	21.9853	5.11895	3.24	7.49922	4.53782	16.1774	4.79379	8.45569	1.83802	0.74934
chr4:77066297-77075543:-	CCNI	ENST00000237654.8	ENST00000237654.8.1	11.4986	1.82379	7.51723	7.03432	4.9132	5.79365	3.6607	5.97918	0.793509	0.557067
chr19:50507676-50511158:-	JOSD2	ENST00000598418.5	ENST00000598418.5.1	0.691192	3.47137	1.19811	1.24809	2.25511	1.64221	1.26029	1.31027	0.65194	0.112215
chr1:31919562-31938010:-	PTP4A2	ENST00000647444.1	ENST00000647444.1.1	13.5912	1	0.704226	0.80304	1.22033	3.00751	1.43946	1.30272	4.6161	1.65254
chr6:78867553-78867742:+	IRAK1BP1	ENST00000369940.6	ENST00000369940.6.1	3.68065	1.82379	5.5862	2.96214	1.82275	2.37465	2.10792	3.0039	0.766065	0.683362
chr1:113929846-113929921:+	HIPK1	ENST00000369558.5	ENST00000369558.5.1	89.1384	16.652	13.46	21.9419	13.0121	55.2968	22.4304	31.096	2.73841	1.08019
chr16:77191221-77193648:+	MON1B	ENST00000248248.7	ENST00000248248.7.1	2.38155	3.30154	2.84052	1.97787	1.8086	1.41326	1.64184	1.65391	0.445621	0.717838
chr10:71964629-72005757:+	CHST3	ENST00000373115.4	ENST00000373115.4.1	17.7883	10.3502	3.54545	11.3955	7.01776	9.92255	6.87671	4.85229	0.854352	0.687486
chr12:56041949-56041973:+	RPS26	ENST00000356464.10	ENST00000356464.10.1	1	1	0.83721	1.64995	0.440901	0.259806	0.369365	0.440823	0.765221	1.6001
chr16:29995981-29996272:+	INO80E	ENST00000563197.5	ENST00000563197.5.1	19.5744	15.0044	20.5517	23.1173	21.2197	46.5844	23.9937	31.2789	0.233417	-0.494023
chr19:35937227-35937341:+	LRFN3	ENST00000588831.5	ENST00000588831.5.1	30.3795	15.0252	7.53331	2.20356	8.63685	3.8927	3.83035	6.77844	1.40282	1.27338
chr2:199955476-199955536:-	TYW5	ENST00000354611.8	ENST00000354611.8.1	4.23033	29.0505	11.7333	11.7788	3.52213	7.6532	8.73162	10.8899	1.12406	0.891871
chr9:137459131-137459278:-	NSMF	ENST00000265663.12	ENST00000265663.12.1	12.3062	61.776	4.14102	4.21483	1.61903	5.29128	1.91152	3.23447	4.21704	2.50751
chr6:53041265-53041385:-	ICK	ENST00000350082.9	ENST00000350082.9.1	5.03792	2.80677	4.88888	3.71616	1.16455	1.6874	3.75651	3.13712	1.2865	1.08329
chr5:134618203-134620981:-	SAR1B	ENST00000507419.5	ENST00000507419.5.1	1.44678	4.11148	3.28261	8.82741	3.07304	2.82477	5.43168	6.79283	0.426202	-0.0625915
chr17:35735123-35740485:+	RASL10B	ENST00000603017.1	ENST00000603017.1.1	1.80758	1	1.72414	1.24071	1.12957	0.94582	1.35745	1.21313	0.22981	0.307544
chr16:30925868-30930145:+	FBXL19	ENST00000471231.6	ENST00000471231.6.1	0.691192	10.3502	1.77778	1.8739	0.507601	2.0841	1.52109	1.53148	1.61014	1.12437
chr12:89656025-89656094:-	ATP2B1	ENST00000428670.7	ENST00000428670.7.1	28.4578	216.054	59.6551	23.2845	39.5778	90.61	119.744	62.3412	0.812367	-0.00898763
chr19:36115085-36115211:-	POLR2I	ENST00000221859.8	ENST00000221859.8.2	12.3062	10.0617	4.65671	8.71	4.80883	9.26846	3.96261	5.45984	0.584145	0.681474
chr16:25111843-25111894:+	LCMT1	ENST00000399069.7	ENST00000399069.7.1	59.7589	57.1009	31.7999	15.9389	14.1614	22.988	18.987	29.0112	1.33759	1.15834
chr12:49566197-49568050:-	MCRS1	ENST00000343810.8	ENST00000343810.8.1	5.48843	3.55664	4.69919	4.6913	3.58858	1.5303	2.55648	2.18358	0.303463	0.97088
chr22:39520746-39521528:+	ATF4	ENST00000404241.6	ENST00000404241.6.1	8.9442	22.6728	20.3018	18.7892	3.46825	3.27974	14.9641	16.9605	2.33287	1.57971
chr5:134758801-134758837:+	DDX46	ENST00000452510.6	ENST00000452510.6.1	282.203	337.605	305.498	124.005	157.426	234.62	199.305	352.434	0.550772	0.355078
chr6:97282439-97282520:-	MMS22L	ENST00000275053.8	ENST00000275053.8.1	18.4242	13.7571	18.36	17.4949	17.0579	39.2532	37.8632	20.4243	0.290359	-0.529049
chr22:50343432-50372117:+	PPP6R2	ENST00000359139.7	ENST00000359139.7.1	2.85285	1.93345	4.5	7.56944	5.25714	10.3872	4.69981	6.08581	0.402052	-0.449065
chr18:26226826-26226922:+	TAF4B	ENST00000269142.9	ENST00000269142.9.1	17.7883	38.4006	10.5454	11.6761	4.21482	10.3611	5.73435	11.7237	1.31994	1.42782
chrX:134796810-134796933:-	FAM122B	ENST00000370790.5	ENST00000370790.5.1	5.8455	29.0505	9.20688	3.59988	2.84765	4.21105	2.81296	3.98563	2.24999	1.71453
chr1:3856991-3857192:-	CEP104	ENST00000378230.7	ENST00000378230.7.1	4.5742	8.41412	4.10377	8.64664	6.81031	24.7201	9.73012	7.99133	0.288654	-0.668984
chr8:73294935-73294959:+	RDH10	ENST00000240285.9	ENST00000240285.9.1	1	15.0252	14.1249	9.66294	19.1027	32.5721	13.1198	25.8547	0.370804	-1.02621
chr7:1158246-1160132:-	ZFAND2A	ENST00000401903.5	ENST00000401903.5.1	1.80758	1	0.708333	0.642209	0.56305	0.894258	0.746604	0.42113	0.896465	0.766021
chr21:46636502-46636913:+	PRMT2	ENST00000355680.7	ENST00000355680.7.2	21.9853	61.776	9.90907	5.26825	17.168	18.6454	13.8214	12.6927	1.12997	0.517475
chr3:179347748-179347793:+	MFN1	ENST00000471841.5	ENST00000471841.5.1	14.7289	52.4258	51.3998	48.8104	17.609	80.6166	25.6611	29.1497	0.563724	0.368559
chr10:12195809-12195911:-	NUDT5	ENST00000491614.5	ENST00000491614.5.1	29.2654	11.3889	28.72	81.7671	46.9836	50.3497	28.4736	67.8405	0.375407	-0.385045
chr7:75486175-75486202:-	POM121C	ENST00000615331.4	ENST00000615331.4.1	5.03792	24.3754	11.7333	6.70642	6.70637	10.6089	8.94058	6.67754	0.586764	0.423723
chr19:39831874-39834198:-	DYRK1B	ENST00000323039.9	ENST00000323039.9.1	8.78621	5.66696	4.97633	4.01907	3.45077	3.09722	2.40651	3.37546	0.488234	0.932511
chr13:29850116-29850173:-	UBL3	ENST00000380680.4	ENST00000380680.4.1	1	5.67508	3.79999	4.17023	5.43829	9.14007	12.0948	14.2284	0.162379	-1.5022
chr8:144519619-144519967:+	LRRC14	ENST00000292524.5	ENST00000292524.5.1	4.12743	3.25846	5.08333	4.38637	4.49218	4.09742	2.83712	2.96386	0.407057	0.317802
chr22:18078019-18078348:+	PEX26	ENST00000329627.11	ENST00000329627.11.1	3.23388	1	0.732241	2.85704	1.23318	4.78386	0.822302	2.65409	0.88265	0.262546
chr11:207788-207950:+	RIC8A	ENST00000526104.5	ENST00000526104.5.1	15.5365	85.1514	49.5331	13.9992	10.924	20.5199	19.5821	33.8868	1.38631	1.08993
chr20:6768277-6768589:+	BMP2	ENST00000378827.4	ENST00000378827.4.1	1.61762	1	3.60465	5.0921	2.9696	9.75032	2.96789	5.72183	0.412705	-0.539635
chr20:6768191-6768278:+	BMP2	ENST00000378827.4	ENST00000378827.4.2	21.9853	1.82379	10.3333	5.0921	13.9968	12.5708	6.77994	11.8577	0.638263	-0.124476
chr19:47352776-47352818:+	DHX34	ENST00000328771.8	ENST00000328771.8.1	29.2654	89.8264	49.5331	35.2385	17.3683	19.5133	11.637	12.7384	1.17299	1.73457
chr8:23449986-23457608:-	ENTPD4	ENST00000356206.10	ENST00000356206.10.1	4.23033	47.7508	21.9998	25.2562	15.2659	39.4356	25.8313	30.1472	0.333985	-0.332153
chr15:81001988-81002279:+	MESDC1	ENST00000267984.3	ENST00000267984.3.3	4.23033	5.67508	3.17241	1.92836	1.69887	5.1181	1.43524	3.60044	0.796596	0.66559
chr2:53765501-53859947:-	GPR75-ASB3	ENST00000406625.5	ENST00000406625.5.1	3.88542	2.86689	6.70652	7.28782	5.59222	7.06816	5.29517	6.27115	0.349404	-0.180719
chr11:66438782-66438821:-	MRPL11	ENST00000430466.6	ENST00000430466.6.1	3.23388	2.55574	2.85841	2.37088	4.6201	11.9951	3.80001	3.72767	0.213154	-0.797578
chr12:100142604-100142811:-	UHRF1BP1L	ENST00000279907.11	ENST00000279907.11.1	13.1138	9.23791	13.0689	5.52513	7.44501	24.4308	17.5044	12.2829	0.552981	-0.261891
chr8:144517670-144517784:-	RECQL4	ENST00000621189.4	ENST00000621189.4.1	4.23033	2.35507	9.59089	5.85028	8.92551	8.32606	3.47392	5.79948	0.977538	0.178364
chr13:41311220-41311412:+	NAA16	ENST00000379406.7	ENST00000379406.7.1	51.3648	66.4511	6.44444	6.35265	12.5541	60.7125	20.1584	15.6933	1.53873	0.563278
chr14:99971814-99971874:+	EVL	ENST00000402714.6	ENST00000402714.6.1	4.23033	71.1261	6.72726	9.8194	7.65743	18.1588	7.14646	13.2708	1.38053	0.620732
chr17:81893566-81893587:+	ANAPC11	ENST00000571570.5	ENST00000571570.5.1	2.33632	15.8282	2.28198	1.65408	8.69064	3.2493	1.86073	3.13383	1.85076	0.785406
chr12:121400162-121400216:+	RNF34	ENST00000392464.3	ENST00000392464.3.1	4.08808	5.35608	14.0232	8.75409	11.5913	35.5953	8.97937	22.5814	0.555098	-0.705722
chr6:156777382-156777520:+	ARID1B	ENST00000346085.9	ENST00000346085.9.1	21.9972	150.602	15.0986	14.9842	27.3854	36.45	38.9131	38.3191	1.56983	0.514512
chr18:10454632-10454866:+	APCDD1	ENST00000355285.9	ENST00000355285.9.1	13.5912	1	5.19998	3.59888	5.81421	4.25229	5.59862	3.62792	0.761305	0.167854
chr20:32743437-32743716:-	COMMD7	ENST00000278980.10	ENST00000278980.10.1	9.39413	10.3502	5.5862	6.3894	5.07421	12.8601	9.81507	7.02088	0.48786	0.0480193
chr11:108009040-108009148:+	CUL5	ENST00000393094.6	ENST00000393094.6.1	84.9413	17.4758	6.07086	7.4998	24.6692	40.5823	12.94	13.1759	1.27992	0.296368
chr3:149812901-149813291:+	RNF13	ENST00000392894.7	ENST00000392894.7.1	4.23033	47.7508	21.9998	3.92476	7.49918	15.4635	13.9687	12.9384	1.09316	0.467372
chr5:150001014-150004883:+	HMGXB3	ENST00000503427.5	ENST00000503427.5.1	10.3823	89.8264	5.77647	10.2252	3.96728	8.37564	4.41276	8.80047	3.95038	1.98301
chr1:26111863-26111914:+	PDIK1L	ENST00000374271.8	ENST00000374271.8.1	30.3795	7.59033	7.99999	12.3135	9.87657	11.703	11.4235	14.3191	1.01608	0.401831
chr22:41544136-41544262:-	POLR3H	ENST00000355209.8	ENST00000355209.8.1	34.5765	43.0757	4.07017	5.85028	6.87054	20.9596	5.57048	6.73156	1.73	1.11894
chr2:166307064-166311764:-	SCN9A	ENST00000409672.5	ENST00000409672.5.1	9.88342	7.59033	10.6552	6.45123	4.02803	6.499	4.68092	5.36637	0.593415	0.827827
chr2:149587666-149587714:-	MMADHC	ENST00000303319.9	ENST00000303319.9.1	13.0629	26.5375	32.36	50.8609	36.7469	95.8804	66.1982	46.8187	0.317754	-0.857631
chr10:32056173-32056200:-	KIF5B	ENST00000302418.4	ENST00000302418.4.1	29.2654	272.154	67.4999	51.6959	94.5129	61.3425	137.732	81.5958	1.71808	0.553342
chr1:241848809-241848917:+	EXO1	ENST00000366548.7	ENST00000366548.7.2	4.68692	13.1957	18.4186	12.7191	6.60894	7.87404	10.848	14.5969	0.452016	0.30867
chr5:79619623-79619707:+	PAPD4	ENST00000423041.6	ENST00000423041.6.1	38.7736	61.776	31.7999	17.6091	7.37695	6.72194	12.4455	8.78918	2.84307	2.2483
chr22:24548046-24555016:-	GUCD1	ENST00000435822.5	ENST00000435822.5.1	2.33632	3.80034	4.74747	5.38028	4.40674	3.05582	5.46525	5.76032	0.253409	-0.161452
chrX:47218426-47218471:+	CDK16	ENST00000457458.6	ENST00000457458.6.1	72.0674	52.075	82.7725	41.5483	25.3117	18.3417	27.2932	15.8263	0.144255	1.5039
chr7:66996843-66996897:+	TYW1	ENST00000359626.9	ENST00000359626.9.1	3.42275	2.64758	7.27585	4.68621	2.25797	11.9891	6.80499	11.0731	0.515292	-0.308874
chr17:78997819-78997939:-	CANT1	ENST00000302345.6	ENST00000302345.6.1	5.02098	5.94275	30.3999	26.994	17.609	9.20817	23.4374	19.7579	0.452194	-0.154484
chr3:50292303-50292483:-	IFRD2	ENST00000436390.5	ENST00000436390.5.1	9.07584	2.64758	12.8276	9.90634	4.49437	7.7803	2.98016	5.98279	1.42809	1.05655
chr12:57755187-57755280:+	MARCH9	ENST00000266643.5	ENST00000266643.5.1	5.8455	24.3754	3.22727	4.17023	0.672288	3.8927	2.27275	1.82987	2.95861	2.22155
chrX:24054923-24054947:+	EIF2S3	ENST00000253039.8	ENST00000253039.8.1	194.065	253.454	26.9412	30.1159	29.4194	86.334	12.7176	23.9877	2.03435	1.68999
chr10:38010753-38012345:+	ZNF33A	ENST00000469037.2	ENST00000469037.2.1	9.39413	0.688852	13.2499	6.07237	11.3953	1.93872	1.92717	2.81642	2.58157	1.35207
chr10:124046318-124046444:-	CHST15	ENST00000346248.7	ENST00000346248.7.1	17.7883	10.3502	5.19998	4.48726	5.09208	5.33904	12.8873	8.37254	1.25129	0.671598
chr16:89418324-89490305:-	ANKRD11	ENST00000301030.9	ENST00000301030.9.1	28.4578	33.9516	24.9531	32.8688	23.2606	52.49	34.8386	31.9035	0.234185	-0.145302
chr1:17005067-17011757:-	ATP13A2	ENST00000452699.5	ENST00000452699.5.1	3.47046	1.48698	4.61666	3.71508	3.24794	2.23464	3.10049	2.60777	0.328343	0.216477
chr22:38700353-38700404:-	JOSD1	ENST00000216039.9	ENST00000216039.9.1	2.61517	1	3.11628	2.53753	2.20161	4.48667	2.71843	4.69988	0.40879	-0.369132
chr2:24793409-24799726:+	CENPO	ENST00000473706.5	ENST00000473706.5.1	17.1517	4.73378	8.69999	3.45375	3.42058	3.97022	3.53599	3.25544	1.58789	1.28213
chr11:803397-804419:-	PIDD1	ENST00000347755.9	ENST00000347755.9.1	1.4809	2.55574	1.58333	2.31085	1.9848	2.05742	2.10305	1.73313	0.271069	0.0266387
chr16:11668537-11676010:+	SNN	ENST00000329565.5	ENST00000329565.5.1	1	1	2.74999	2.39254	3.78503	3.7454	2.88066	5.64388	0.282993	-1.06662
chr4:5711349-5719288:+	EVC	ENST00000264956.10	ENST00000264956.10.1	1.80758	15.0252	1.46666	2.58512	1.8739	4.36551	2.32849	6.15682	1.21523	0.44789
chr11:10808853-10808904:-	EIF4G2	ENST00000339995.9	ENST00000339995.9.1	22.3244	33.1859	21.6337	27.1658	25.8907	61.2317	28.5524	47.5233	0.132289	-0.549229
chr1:112619385-112619493:+	CAPZA1	ENST00000263168.3	ENST00000263168.3.1	13.9213	15.8282	45.8635	65.5208	31.2656	25.2149	67.718	60.6919	0.231559	-0.499284
chr1:50968787-50969330:+	CDKN2C	ENST00000262662.5	ENST00000262662.5.1	0.719067	1.96558	1.01781	1.3381	0.978334	1.21072	0.837783	0.992829	0.321698	0.298987
chr15:82875400-82952621:-	HOMER2	ENST00000304231.12	ENST00000304231.12.1	17.7883	3.47137	3.27907	17.4596	1.91224	4.59523	4.90309	4.71454	3.5075	1.85098
chr2:175136458-175151079:-	ATF2	ENST00000345739.9	ENST00000345739.9.2	47.1677	89.8264	16.909	14.632	6.02492	5.0871	11.7301	6.20032	6.4476	2.87223
chr8:33453499-33461642:-	FUT10	ENST00000327671.9	ENST00000327671.9.1	9.39413	1	2.12	2.37872	1.85844	1	0.74807	0.795586	1.43583	1.57031
chr2:201045506-201045566:-	FAM126B	ENST00000418596.7	ENST00000418596.7.1	9.39413	5.11895	14.1249	8.46207	8.42676	9.54707	3.80007	13.5557	1.29994	0.583094
chr12:68808246-68808291:+	MDM2	ENST00000258149.9	ENST00000258149.9.1	74.4901	25.9334	51.7192	29.4672	15.6557	79.515	29.576	37.999	1.72719	0.927577
chr7:101252018-101252120:-	FIS1	ENST00000474120.5	ENST00000474120.5.1	4.23033	29.0505	5.06	1.99045	5.69721	24.1992	5.2132	7.26595	0.342596	-0.32755
chr4:105708817-105717738:+	GSTCD	ENST00000394730.7	ENST00000394730.7.1	2.17973	6.76654	4.67948	4.92429	2.16588	4.14219	2.65662	3.68787	0.291394	0.520213
chr20:3854587-3854638:+	MAVS	ENST00000428216.3	ENST00000428216.3.1	7.17615	89.8264	95.4993	34.4209	35.1809	17.6759	33.0982	57.6554	1.95757	1.13228
chr2:218562685-218562772:-	USP37	ENST00000258399.7	ENST00000258399.7.1	34.5765	9.23791	35.9999	22.6641	16.8869	27.924	42.1656	37.9963	0.656125	-0.0631773
chr16:30762115-30762223:+	RNF40	ENST00000324685.10	ENST00000324685.10.1	68.0295	290.855	333.498	161.606	118.932	151.591	208.896	125.127	0.498178	0.427256
chr22:49913704-49913842:-	ALG12	ENST00000330817.10	ENST00000330817.10.1	72.3501	6.87199	12.2	7.82883	8.26828	9.15894	11.0895	8.28246	3.38775	1.52932
chr3:49510435-49510459:+	DAG1	ENST00000308775.6	ENST00000308775.6.1	23.6123	159.953	47.1034	51.4067	127.719	162.292	123.034	156.377	0.306052	-1.0877
chr1:45691012-45691060:+	TMEM69	ENST00000372025.4	ENST00000372025.4.1	5.03792	2.64758	12.2	9.2426	10.7476	12.8601	7.0293	15.2854	0.584726	-0.4079
chr2:134254265-134254310:+	MGAT5	ENST00000409645.5	ENST00000409645.5.1	47.1677	5.94275	17.5454	5.38715	25.0935	36.4093	14.2585	6.08581	0.619286	0.0561045
chr4:147617623-147617659:+	TMEM184C	ENST00000508208.5	ENST00000508208.5.1	1.80758	5.67508	5.45453	3.21916	7.25847	10.2566	4.98547	9.42473	0.32776	-0.837796
chr4:147617704-147617833:+	TMEM184C	ENST00000508208.5	ENST00000508208.5.2	9.39413	0.548308	7.99997	3.21916	7.25847	10.2566	4.52323	2.78764	0.628272	0.0946176
chr15:78123719-78131261:-	CIB2	ENST00000258930.7	ENST00000258930.7.1	1.80758	15.0252	2.93103	5.64179	3.06197	3.01577	3.29094	2.51379	1.73537	1.12226
chr18:36129220-36129250:-	SLC39A6	ENST00000269187.9	ENST00000269187.9.1	93.3354	113.202	13.2807	29.404	30.0731	110.891	53.814	31.7809	1.06985	0.405027
chr8:38176276-38176606:-	LSM1	ENST00000311351.8	ENST00000311351.8.1	1.92642	3.47137	2.61538	2.39868	3.43265	7.38526	3.10788	3.07308	0.152714	-0.592198
chr1:222712693-222712714:+	BROX	ENST00000340934.9	ENST00000340934.9.1	72.3501	94.5015	124.374	123.147	74.3393	82.8077	76.0145	111.311	0.251543	0.280061
chr10:102424780-102432576:-	CUEDC2	ENST00000369937.4	ENST00000369937.4.1	3.62494	3.3731	5.10059	7.00431	7.36443	7.12234	6.27631	8.35032	0.171791	-0.611923
chr22:29603841-29603943:+	NF2	ENST00000338641.8	ENST00000338641.8.1	5.91453	1.71193	4.45882	3.71479	3.48524	14.3617	6.05957	5.13392	0.564947	-0.288228
chr1:35557212-35557269:-	KIAA0319L	ENST00000325722.7	ENST00000325722.7.1	89.1384	11.7093	21.5172	31.1172	30.6074	45.2583	20.1403	31.1044	0.978116	0.389516
chr15:50648801-50686717:-	TRPM7	ENST00000313478.11	ENST00000313478.11.1	14.7289	7.32368	5.04687	3.9619	4.04813	4.43702	4.64266	3.78763	1.05672	0.89183
chr21:31731896-31731953:-	SCAF4	ENST00000399804.5	ENST00000399804.5.1	38.9564	230.079	35.8772	53.577	42.3241	163.665	49.0272	76.4748	0.281966	-0.0898101
chr15:89247637-89247730:+	FANCI	ENST00000300027.12	ENST00000300027.12.1	13.0138	31.3036	26.8523	19.1107	14.8395	19.0669	11.4975	13.4285	0.52273	0.650161
chr9:120788274-120793252:-	FBXW2	ENST00000608872.5	ENST00000608872.5.1	3.23388	3.71015	2.69697	3.9648	1.991	12.3056	2.52015	5.12814	0.479749	-0.0857966
chr5:69094205-69094247:+	SLC30A5	ENST00000396591.7	ENST00000396591.7.1	51.3648	8.22706	14.2222	14.7206	10.6881	22.6237	12.3624	15.1769	1.74692	0.865885
chr16:68266597-68274779:+	SLC7A6	ENST00000219343.10	ENST00000219343.10.1	5.03792	24.3754	4.28125	5.89213	7.99012	8.92245	4.78381	5.98905	0.830994	0.389896
chr16:56451289-56451310:-	NUDT21	ENST00000300291.9	ENST00000300291.9.1	131.109	10.967	27.7969	26.3407	26.9091	73.7894	25.3507	39.7157	1.86475	0.761422
chr6:24403000-24405171:+	MRS2	ENST00000378386.7	ENST00000378386.7.1	15.5365	4.08503	3.54545	2.9904	2.30663	2.75842	2.04179	1.95262	2.23321	1.52161
chr2:27211485-27212205:-	SLC5A6	ENST00000310574.7	ENST00000310574.7.1	55.5619	10.0617	10.7674	3.73674	8.38598	6.53366	5.35478	4.80131	2.2868	1.45347
chr8:43102587-43122120:+	POMK	ENST00000331373.9	ENST00000331373.9.2	2.28241	3.3731	3.2931	2.50686	2.7416	2.30012	3.67072	2.82966	0.258639	0.0292922
chr2:38778194-38778278:+	GEMIN6	ENST00000409011.5	ENST00000409011.5.1	0.691192	19.7003	1.97674	4.68621	1.14885	4.06652	2.34709	2.49114	1.68776	1.03025
chr2:232550240-232550285:-	TIGD1	ENST00000408957.4	ENST00000408957.4.1	0.192416	5.67508	2.86666	2.26809	1.46417	4.43175	2.88066	2.47451	0.425963	-0.267215
chr22:24035476-24035515:+	CABIN1	ENST00000263119.9	ENST00000263119.9.1	147.897	131.902	53.2665	76.3676	30.6074	28.1212	46.2853	66.9327	1.80839	1.56247
chr15:52019250-52045844:+	MAPK6	ENST00000261845.6	ENST00000261845.6.1	9.39413	1.82379	4.86206	4.80428	2.63856	2.69187	3.15387	5.08615	1.12922	0.749328
chr1:41159925-41186133:-	SCMH1	ENST00000372596.5	ENST00000372596.5.1	7.46067	24.3754	5.08333	3.45268	3.09662	2.24319	3.08513	2.42566	3.93128	2.03093
chr11:63813414-63813462:+	C11orf84	ENST00000294244.8	ENST00000294244.8.1	47.1677	38.4006	37.7497	37.3843	84.1621	49.7309	35.5689	40.473	0.185936	-0.269857
chr12:123230456-123230486:-	MPHOSPH9	ENST00000606320.5	ENST00000606320.5.1	76.5472	131.902	15.3889	24.3491	37.6696	26.1291	11.2127	10.3174	1.39979	1.43464
chr4:112232017-112232161:+	AP1AR	ENST00000274000.9	ENST00000274000.9.1	17.7883	29.0505	9.86663	4.21483	8.89093	11.1751	6.82492	6.93362	0.733438	0.73419
chr4:112231822-112231903:+	AP1AR	ENST00000274000.9	ENST00000274000.9.2	17.7883	29.0505	2.96	9.55963	4.61065	5.03153	5.66673	6.93362	2.07016	1.52768
chr1:147611589-147611796:+	BCL9	ENST00000234739.7	ENST00000234739.7.1	8.26825	2.80677	38.6247	8.95446	11.1447	21.3502	9.06072	9.90843	1.61526	0.59454
chr18:2571529-2573062:+	NDC80	ENST00000261597.8	ENST00000261597.8.1	59.9536	15.0013	26.3982	17.4983	32.1489	21.5309	21.3684	21.8754	0.459985	0.200659
chr2:27052939-27053002:+	AGBL5	ENST00000360131.4	ENST00000360131.4.1	84.9413	5.67508	16.2727	13.0686	15.3567	15.1104	19.4958	16.3045	2.11248	0.915137
chr2:119760212-119760281:+	PTPN4	ENST00000263708.6	ENST00000263708.6.1	21.9853	5.11895	6.40908	7.02344	8.89093	17.4724	10.1944	14.5834	0.876318	-0.0454129
chr1:75724531-75724627:+	ACADM	ENST00000370841.8	ENST00000370841.8.1	47.1677	117.877	27.0908	81.5653	51.5948	131.407	41.9642	37.0515	0.607997	0.219775
chr17:44117682-44123592:-	HDAC5	ENST00000225983.10	ENST00000225983.10.1	34.5765	2.35507	4.07017	4.77393	5.54961	3.68205	11.6108	7.12825	2.46143	0.980084
chr9:86947059-86947134:-	GAS1	ENST00000298743.8	ENST00000298743.8.1	5.19707	10.3502	9.74994	12.2618	10.2834	7.6532	8.94058	14.0042	0.310141	-0.0649599
chr7:103029417-103074770:-	FBXL13	ENST00000379305.7	ENST00000379305.7.1	0.192416	1	0.533335	1	1	1.81401	0.410512	0.763597	0.483243	-0.254776
chr2:64653757-64653796:-	SERTAD2	ENST00000313349.3	ENST00000313349.3.1	3.42275	29.0505	49.9996	40.8495	17.246	29.1404	21.7413	15.3978	0.988749	0.620136
chrX:47145446-47147425:+	RBM10	ENST00000377604.7	ENST00000377604.7.1	36.5337	41.3658	19.7174	16.29	27.3662	16.8282	16.1956	16.6166	0.569006	0.582775
chr3:87227522-87245727:+	CHMP2B	ENST00000471660.5	ENST00000471660.5.1	2.65162	2.28744	2.8806	1.02691	2.54071	2.57834	2.29844	2.27971	0.294702	-0.138217
chr8:144104624-144104747:+	MAF1	ENST00000322428.9	ENST00000322428.9.1	8.26825	43.0757	5.03846	5.69722	5.55314	9.04615	4.96619	7.5706	1.61367	1.00321
chr1:74733207-74733324:+	TYW3	ENST00000370867.7	ENST00000370867.7.1	38.7736	1.95898	5.26562	3.81276	5.47873	9.31436	4.10251	4.2247	2.74568	1.24389
chr1:93079495-93079522:+	MTF2	ENST00000370298.8	ENST00000370298.8.1	13.5097	23.2424	10.8437	11.1306	19.7754	75.1258	15.8706	12.1679	0.216967	-0.626745
chr19:18155480-18155573:+	PIK3R2	ENST00000222254.12	ENST00000222254.12.1	30.3795	5.11895	4.22	5.81424	8.26828	12.2184	6.50907	11.6318	1.36726	0.38994
chr19:18155599-18155623:+	PIK3R2	ENST00000222254.12	ENST00000222254.12.2	30.3795	5.11895	14.0666	5.81424	51.2438	22.1642	10.0727	14.2243	0.445567	-0.605455
chr19:18155816-18155849:+	PIK3R2	ENST00000222254.12	ENST00000222254.12.3	30.3795	29.0505	26.3748	11.2119	11.4765	37.3766	10.9274	13.2406	0.863482	0.740874
chr10:5685114-5712857:+	FAM208B	ENST00000328090.9	ENST00000328090.9.1	6.61054	12.8236	17.663	15.3679	15.5959	14.545	11.9847	16.0576	0.372458	-0.098363
chr15:99731407-99731999:-	LYSMD4	ENST00000344791.6	ENST00000344791.6.1	2.34033	2.80677	2.39999	2.20356	3.4071	3.31416	2.91584	2.05161	0.139015	-0.221392
chr6:95577575-95586428:+	MANEA	ENST00000358812.8	ENST00000358812.8.2	63.956	117.877	66.7997	26.9969	24.2812	18.5003	13.3324	31.0172	2.12108	1.89592
chr18:32092046-32092082:+	RNF138	ENST00000261593.7	ENST00000261593.7.1	42.9707	61.776	24.3332	17.8022	61.6391	73.0668	25.6576	40.3051	0.190519	-0.447781
chr20:47502006-47583223:+	NCOA3	ENST00000372004.7	ENST00000372004.7.1	9.07584	75.8012	8.38888	6.15063	23.8255	45.3634	12.752	20.3851	0.546312	-0.409528
chr20:33993688-33993982:+	RALY	ENST00000375114.7	ENST00000375114.7.1	105.927	27.3613	11.859	25.4454	68.2083	74.4745	34.0728	35.7345	0.488387	-0.424449
chr11:94768424-94768493:+	AMOTL1	ENST00000317829.12	ENST00000317829.12.1	143.7	150.602	25.2558	21.6867	74.3393	59.4325	41.9764	98.4339	0.945372	0.403002
chr11:2402314-2402338:+	TSSC4	ENST00000380996.9	ENST00000380996.9.2	34.5765	47.7508	17.5454	19.5671	32.1858	20.2178	20.2246	12.3437	0.576228	0.557979
chr5:31529078-31530812:-	DROSHA	ENST00000511367.6	ENST00000511367.6.1	194.065	314.23	184.749	232.3	143.935	156.115	80.6147	72.9828	0.658548	1.14336
chr5:31530855-31530891:-	DROSHA	ENST00000511367.6	ENST00000511367.6.2	10.9097	55.3702	50.9654	64.548	52.6743	41.6818	39.424	57.5532	0.457262	-0.0182192
chr11:904826-910780:-	CHID1	ENST00000323578.12	ENST00000323578.12.1	3.24421	15.0044	6.81132	5.51683	11.7581	24.3338	9.55989	10.5996	0.162363	-0.912207
chr12:54017295-54053923:+	HOXC4	ENST00000303406.4	ENST00000303406.4.1	0.407064	0.457342	0.393189	0.390631	0.387042	0.915713	0.754972	0.55904	0.221269	-0.529739
chr20:50903959-50928818:-	ADNP	ENST00000396029.8	ENST00000396029.8.1	5.69726	12.1536	25.7187	12.5124	18.8248	18.6085	16.5513	15.0452	0.456419	-0.259594
chr14:74692087-74692183:-	AREL1	ENST00000356357.8	ENST00000356357.8.1	17.7883	5.94275	12.3749	4.36997	17.4592	12.5708	9.40021	13.8202	0.404457	-0.356493
chr11:9265172-9265274:-	DENND5A	ENST00000328194.7	ENST00000328194.7.1	42.9707	5.94275	19.6666	16.7821	33.9183	38.7493	8.44688	9.80917	0.794542	0.448735
chr1:184477466-184477505:+	C1orf21	ENST00000235307.6	ENST00000235307.6.1	13.5912	1	7.36362	9.55963	3.91015	7.94247	7.94322	9.63866	1.25711	0.464829
chr17:19282952-19282997:+	EPN2	ENST00000314728.9	ENST00000314728.9.1	17.7883	47.7508	35.1248	12.1403	15.2659	7.0473	15.5898	15.059	2.38451	1.45946
chr19:46746068-46748085:+	FKRP	ENST00000318584.9	ENST00000318584.9.1	4.08808	24.3754	9.3611	17.7104	7.59634	10.5459	14.853	9.69235	0.762717	0.407906
chr19:46755412-46755433:+	FKRP	ENST00000318584.9	ENST00000318584.9.2	55.5619	24.3754	42.1247	33.0529	18.1744	25.0223	21.0604	23.8933	0.784951	0.890415
chr1:213015723-213015804:-	ANGEL2	ENST00000360506.6	ENST00000360506.6.1	38.7736	5.51692	28.0666	7.82445	16.3177	4.45854	12.4962	6.14623	0.53009	0.834431
chr19:57819912-57856116:+	CTD-2583A14.10	ENST00000596498.2	ENST00000596498.2.1	0.017998	0.0296511	0.0316208	0.0273837	0.0714588	0.0885328	0.0508445	0.0623892	0.138178	-1.27963
chr1:156727994-156728312:-	ISG20L2	ENST00000313146.10	ENST00000313146.10.1	5.46775	29.0505	11.6207	13.2763	3.82057	11.1244	4.99243	4.90542	0.503505	1.18216
chr1:156727802-156727976:-	ISG20L2	ENST00000313146.10	ENST00000313146.10.2	51.3648	29.0505	22.4666	25.6015	26.9882	26.395	13.8214	21.4031	0.325026	0.542381
chr1:156727692-156727749:-	ISG20L2	ENST00000313146.10	ENST00000313146.10.3	51.3648	29.0505	15.3181	8.96186	6.04426	11.1244	12.0461	9.12611	3.04036	1.74019
chr3:171460320-171460395:-	TNIK	ENST00000436636.6	ENST00000436636.6.1	14.7289	75.8012	40.1998	31.4342	23.1914	27.9021	30.9021	44.4967	0.835924	0.421993
chr13:36283698-36297719:-	CCDC169-SOHLH2	ENST00000511166.1	ENST00000511166.1.1	1	1	2.39999	1	0.365959	0.71073	0.852628	1.54944	0.914755	0.925954
chr11:61333295-61333316:+	TKFC	ENST00000394900.7	ENST00000394900.7.1	9.39413	15.0252	36.8747	25.2562	58.174	28.454	31.5085	39.564	0.361174	-0.679106
chr4:103076263-103076299:-	SLC9B2	ENST00000362026.7	ENST00000362026.7.1	1	15.0252	5.13635	5.33147	5.17755	8.32606	4.1112	4.42785	0.581236	0.154187
chr12:15882404-15882425:+	STRAP	ENST00000419869.6	ENST00000419869.6.1	13.9565	29.0089	24.625	27.7342	154.641	89.4314	74.5647	84.2256	0.102959	-1.8968
chr17:7405578-7405605:+	NLGN2	ENST00000575301.5	ENST00000575301.5.1	5.8455	29.0505	7.06664	5.17761	10.2834	16.0997	6.30539	13.1383	0.550426	-0.0410975
chr12:110614105-110614186:+	TCTN1	ENST00000551590.5	ENST00000551590.5.1	34.5765	19.7003	8.9655	19.5671	20.9723	57.9671	9.99607	26.7369	0.474998	-0.145097
chr1:51519203-51519245:-	EPS15	ENST00000371733.7	ENST00000371733.7.1	168.883	225.404	74.733	41.6803	51.4062	61.7466	30.9557	45.1409	1.05056	1.36082
chr17:56978109-56978229:+	SCPEP1	ENST00000262288.7	ENST00000262288.7.1	38.7736	38.4006	18.1379	19.7044	15.6238	46.5844	23.606	34.3775	0.767678	0.216476
chr14:49620883-49620925:+	MGAT2	ENST00000305386.3	ENST00000305386.3.1	3.23388	29.0505	17.2272	7.98065	15.9	26.1665	27.1203	19.2598	0.33652	-0.759265
chr17:58417122-58417215:-	RNF43	ENST00000407977.6	ENST00000407977.6.1	21.9853	10.3502	6.24996	4.48726	4.71338	5.07003	2.54132	6.67754	1.43455	1.29825
chr17:39451191-39451245:-	MED1	ENST00000394287.7	ENST00000394287.7.1	13.1138	14.1807	11.6944	7.62224	22.8744	18.7754	11.9456	11.5433	0.151217	-0.430575
chr19:55648946-55649054:+	CCDC106	ENST00000592996.5	ENST00000592996.5.1	1	1.82379	9.74994	2.95685	8.42676	1.89747	4.47451	7.8557	0.794339	-0.137953
chr9:98119090-98119192:-	TRIM14	ENST00000375098.7	ENST00000375098.7.1	13.5912	10.3502	2.30232	5.1213	3.32812	5.03861	7.03683	3.43012	1.36013	0.992431
chr5:102865829-102865907:+	PAM	ENST00000438793.7	ENST00000438793.7.1	6.86735	99.1766	92.4663	46.7353	114.722	105.137	39.0728	46.4493	0.824494	0.129559
chr19:36525202-36525301:-	ZNF260	ENST00000523638.5	ENST00000523638.5.1	63.956	61.776	7.23437	6.08678	11.0885	6.71007	7.74759	6.61663	3.4982	2.07278
chr17:68248064-68248157:+	AMZ2	ENST00000359904.7	ENST00000359904.7.2	8.26825	47.7508	19.1999	18.1746	65.1041	20.2956	12.7093	10.8068	0.809112	0.503923
chr12:46243229-46243274:-	SLC38A1	ENST00000398637.9	ENST00000398637.9.2	14.85	145.927	16.75	22.4738	30.735	29.0242	20.3011	33.0433	1.89399	0.810682
chr17:67239480-67243813:-	HELZ	ENST00000358691.9	ENST00000358691.9.1	513.042	473.183	95.4998	124.639	120.292	121.88	69.6193	123.867	1.45442	1.39579
chr6:37354078-37354141:+	RNF8	ENST00000373479.8	ENST00000373479.8.1	93.3354	103.852	10.6026	12.565	28.5808	40.2642	12.3837	17.9634	1.10083	0.887637
chr6:105161968-105161992:-	POPDC3	ENST00000254765.3	ENST00000254765.3.1	1	1	1	0.682977	2.85669	7.17715	1.88423	0.628532	0.351705	-0.924996
chr7:45109218-45111669:-	TBRG4	ENST00000395655.8	ENST00000395655.8.1	19.8373	183.328	16.6154	12.8778	24.398	31.0532	16.9697	13.738	2.16324	1.1099
chr1:100894689-100894770:-	EXTL2	ENST00000370114.7	ENST00000370114.7.1	4.23033	15.0252	11.5	5.65627	9.66557	7.50459	3.69882	14.1365	1.13787	0.572652
chr1:100895425-100895641:-	EXTL2	ENST00000370114.7	ENST00000370114.7.2	21.9853	2.64758	16.8666	13.5328	18.6386	19.7222	13.7467	19.3146	0.441313	-0.303377
chr19:49876982-49877072:-	AKT1S1	ENST00000391835.1	ENST00000391835.1.2	38.7736	61.776	23.2727	22.5576	41.383	9.85077	18.2453	25.524	2.27357	1.22766
chr2:111883960-111884068:-	ANAPC1	ENST00000341068.7	ENST00000341068.7.1	42.9707	33.7255	16.2727	9.66563	11.676	11.994	14.8276	11.7564	1.18764	1.07241
chr1:160031792-160031888:-	PIGM	ENST00000368090.4	ENST00000368090.4.1	5.8455	85.1514	13.0555	30.2433	22.2404	80.6166	12.2272	27.2731	0.353362	-0.194403
chrX:55146232-55161176:-	FAM104B	ENST00000358460.8	ENST00000358460.8.1	1	1	1	1	1.19796	1.0466	1.11966	1	0.0625397	-0.118981
chr11:65640884-65640986:+	SIPA1	ENST00000534313.5	ENST00000534313.5.1	30.3795	33.7255	3.76744	7.97451	13.5327	8.52101	8.22123	11.3713	1.40138	0.880169
chr1:11980455-11980482:+	MFN2	ENST00000235329.9	ENST00000235329.9.2	114.321	13.1957	178.624	154.334	110.081	130.034	94.1632	154.808	0.635036	0.0121742
chr10:6089166-6097053:+	RBM17	ENST00000379888.8	ENST00000379888.8.1	59.7589	85.1514	76.2495	48.3462	80.697	45.3634	30.1388	53.1663	0.729357	0.598583
chr1:151006571-151006697:-	FAM63A	ENST00000361936.9	ENST00000361936.9.1	9.39413	1	8.46664	7.96268	4.36994	24.3359	6.3497	11.0617	0.777191	0.0854376
chr19:17245469-17245544:-	NR2F6	ENST00000291442.3	ENST00000291442.3.1	21.9853	38.4006	7.6818	9.35522	15.5829	19.3152	8.11741	12.4656	0.476999	0.349305
chr5:65988635-65992716:+	ERBIN	ENST00000284037.9	ENST00000284037.9.1	68.1531	108.527	105.124	32.5333	36.3844	56.1943	69.2333	131.714	0.679948	0.477631
chr18:11689339-11689366:+	GNAL	ENST00000334049.10	ENST00000334049.10.1	21.9853	15.0252	25.4998	19.1922	6.68701	23.6496	13.7905	11.9905	0.94929	0.882211
chr14:99481425-99481458:+	CCNK	ENST00000555049.5	ENST00000555049.5.1	30.3795	43.0757	63.9995	8.4744	18.1744	64.1442	32.6995	17.9028	0.633013	0.255094
chr13:27621925-27621961:+	POLR1D	ENST00000636817.1	ENST00000636817.1.1	0.192416	5.67508	2.90909	1.27955	0.837514	1.15487	2.01677	0.655619	1.72237	1.09388
chr3:150408669-150408696:+	TSC22D2	ENST00000361875.7	ENST00000361875.7.1	21.9853	24.3754	48.2497	29.3149	46.9124	36.4093	28.3741	42.3281	0.480058	-0.179852
chr1:119711901-119711946:+	PHGDH	ENST00000641597.1	ENST00000641597.1.1	1100.63	618.11	379.777	233.882	493.333	201.809	216.097	298.185	0.823546	0.970055
chr16:71454158-71456796:-	ZNF23	ENST00000357254.8	ENST00000357254.8.1	9.39413	10.3502	3.89655	4.85139	2.90212	2.73562	2.66976	2.22163	0.903189	1.41463
chr17:16567766-16567805:-	ZNF287	ENST00000395825.3	ENST00000395825.3.1	63.956	33.7255	21.9998	23.5236	13.9941	24.3359	14.2081	12.5603	1.29702	1.22917
chr4:174283857-174284253:-	FBXO8	ENST00000393674.6	ENST00000393674.6.1	13.5912	38.4006	7.99998	18.6388	8.89093	7.0473	9.98792	13.3837	1.84264	1.19712
chr14:70907577-70907754:+	PCNX1	ENST00000304743.6	ENST00000304743.6.1	23.6123	11.7093	23.2727	28.8507	8.47436	29.6377	8.1089	27.3153	1.07734	0.82937
chr8:41598860-41598998:+	AGPAT6	ENST00000396987.7	ENST00000396987.7.1	51.3648	15.0252	14.5333	20.0585	41.7148	8.62848	7.71558	10.9289	0.260031	0.742366
chr2:151828232-151828403:-	ARL5A	ENST00000295087.12	ENST00000295087.12.1	0.192416	0.176209	0.758621	0.860225	1	0.775633	0.211647	0.701621	1.37852	0.386817
chr15:90875625-90875691:+	FURIN	ENST00000268171.7	ENST00000268171.7.1	68.1531	5.94275	8.81394	14.4612	46.4889	78.5576	16.7278	45.7714	0.526992	-0.746312
chr5:103120412-103129364:+	PPIP5K2	ENST00000321521.13	ENST00000321521.13.1	38.7736	12.5331	5.06	8.70278	22.8161	17.1544	15.6918	16.4796	0.52775	-0.286061
chr15:58771325-58771373:+	FAM63B	ENST00000559228.5	ENST00000559228.5.1	3.42275	19.7003	7.04544	6.07237	21.4236	29.1404	6.26617	18.9368	0.37048	-0.810434
chr1:203802307-203802565:+	ZC3H11A	ENST00000639812.1	ENST00000639812.1.2	38.7736	61.776	26.1363	70.3035	46.9124	10.3458	16.3267	16.1298	2.07435	1.67322
chr19:2737331-2737364:-	SLC39A3	ENST00000545664.5	ENST00000545664.5.1	8.26825	15.0252	25.7332	8.94349	27.9467	17.4884	15.8178	20.133	0.516662	-0.310213
chr14:80916495-80939464:-	C14orf145	ENST00000555265.5	ENST00000555265.5.1	17.7883	10.3502	11.1818	12.3135	7.01776	6.86405	8.70659	18.0326	0.668023	0.587308
chr12:111406242-111418149:+	SH2B3	ENST00000341259.6	ENST00000341259.6.1	9.39413	5.67508	7.12496	2.58512	1.31702	3.7454	2.47372	4.13893	2.49681	1.60323
chr2:102762608-102764388:+	TMEM182	ENST00000640575.1	ENST00000640575.1.1	0.192416	5.67508	1	0.365953	0.365959	0.450246	0.557884	0.535612	5.04829	1.96402
chr19:35248565-35248868:+	LSR	ENST00000602122.5	ENST00000602122.5.1	156.291	136.577	41.6388	27.8103	40.9756	38.5666	40.4977	58.8528	1.47999	1.14671
chr13:102799339-102799420:+	BIVM-ERCC5	ENST00000639435.1	ENST00000639435.1.2	105.927	113.202	14.0232	39.991	17.3683	20.9687	17.555	14.7238	2.12211	1.90808
chr13:67229884-67229983:-	PCDH9	ENST00000544246.5	ENST00000544246.5.1	4.39688	85.1514	32.2665	65.972	59.9065	40.122	13.5206	11.9074	1.95476	1.33951
chr8:125083951-125084014:-	WASHC5	ENST00000318410.11	ENST00000318410.11.1	47.1677	47.7508	11.8889	20.6554	47.4172	21.9076	18.338	36.6031	0.645688	0.133237
chr9:35605548-35605593:+	TESK1	ENST00000336395.5	ENST00000336395.5.1	9.39413	6.76654	4.73332	3.78507	2.53752	8.73306	2.07693	6.17964	1.25513	0.881353
chr5:179801905-179806626:-	MGAT4B	ENST00000292591.11	ENST00000292591.11.1	2.28241	5.96861	2.92035	4.24984	2.45626	5.21941	3.37518	3.0425	0.208095	0.115975
chr7:100612768-100612915:+	MOSPD3	ENST00000223054.8	ENST00000223054.8.1	1	1	2.74999	1.95107	1.48142	1.44873	1.45529	1.46439	0.504293	0.197637
chr12:50057628-50057655:+	ASIC1	ENST00000228468.8	ENST00000228468.8.1	3.42275	5.67508	2.16666	2.46238	10.147	4.35256	6.24029	7.74151	0.420001	-0.794329
chr2:74529639-74529783:-	AUP1	ENST00000377526.3	ENST00000377526.3.1	177.277	108.527	28.8055	17.6782	58.2891	144.447	23.6238	59.6674	1.04215	0.408247
chr1:28516732-28516795:+	RCC1	ENST00000373833.10	ENST00000373833.10.1	97.5325	136.577	127.874	47.6024	31.2656	72.2256	48.4643	72.2062	0.928262	1.05454
chr19:48753004-48753347:-	FUT1	ENST00000310160.7	ENST00000310160.7.1	13.5912	1	7.36362	3.91017	3.78503	3.05905	4.27013	3.67684	1.21078	0.745362
chr19:48753453-48753492:-	FUT1	ENST00000310160.7	ENST00000310160.7.2	13.5912	1	20.2499	3.91017	7.06391	3.05905	5.36707	5.15543	1.3341	0.76179
chr1:16608532-16608640:-	NBPF1	ENST00000430580.6	ENST00000430580.6.1	0.073577	0.176209	0.300001	0.208148	0.301127	0.225644	0.0967689	0.100409	1.11499	0.631902
chrX:119565223-119565355:-	CXorf56	ENST00000320339.8	ENST00000320339.8.1	2.61517	5.67508	5.34482	4.88022	2.68497	1.87283	4.67603	6.39415	0.906433	0.563274
chr6:28281798-28281843:+	PGBD1	ENST00000259883.3	ENST00000259883.3.1	21.9853	71.1261	27.2498	27.4582	29.587	46.2991	21.8689	18.0326	0.32121	0.335728
chr16:84116750-84116810:-	MBTPS1	ENST00000343411.7	ENST00000343411.7.2	11.7226	9.58214	32.3792	36.6254	22.9231	44.1012	23.2355	42.8937	0.437463	-0.426601
chr13:48975931-48976012:+	FNDC3A	ENST00000492622.6	ENST00000492622.6.1	105.927	141.252	97.2493	63.1999	42.7755	46.3221	34.1587	93.7715	0.939398	1.17738
chr4:127880936-127881026:+	PLK4	ENST00000270861.9	ENST00000270861.9.1	4.5742	57.1009	19.7727	52.1113	7.65743	10.2566	10.1059	19.7303	1.81644	1.42792
chr5:79512921-79512990:-	HOMER1	ENST00000334082.10	ENST00000334082.10.1	17.7883	3.25846	9.86663	5.1213	9.42486	9.07721	9.69495	4.92666	0.542492	0.105532
chr19:36115209-36115323:+	TBCB	ENST00000221855.7	ENST00000221855.7.1	194.065	188.003	83.5516	58.6213	241.906	139.271	194.24	168.017	0.395166	-0.448513
chr4:86594599-86594764:+	PTPN13	ENST00000427191.6	ENST00000427191.6.1	194.065	155.278	57.318	41.3543	34.1757	94.6108	60.9829	84.3768	2.05686	1.12923
chr4:86594355-86594451:+	PTPN13	ENST00000427191.6	ENST00000427191.6.2	20.6581	155.278	84.0663	26.14	55.8445	94.6108	54.0417	36.0513	0.541095	0.101585
chr15:45522419-45522467:-	SLC30A4	ENST00000261867.4	ENST00000261867.4.1	9.39413	5.67508	2.5909	3.78507	7.06391	14.0407	1.88423	6.49115	0.434334	-0.11551
chr3:38453968-38454130:+	ACVR2B	ENST00000352511.4	ENST00000352511.4.1	1	15.0252	7.99997	3.78507	3.09662	4.18197	7.91378	4.12999	1.25888	0.546752
chr21:46323278-46323362:-	C21orf58	ENST00000291691.11	ENST00000291691.11.2	26.1824	4.29516	3.89655	4.36997	0.580676	2.44635	2.69699	4.17121	18.9128	3.62462
chr21:42502330-42518408:+	SLC37A1	ENST00000398341.7	ENST00000398341.7.1	5.19707	5.67508	7.12496	2.39254	3.88852	8.54985	2.02441	3.81497	1.17909	0.619869
chr12:111842023-111842197:+	MAPKAPK5	ENST00000550735.6	ENST00000550735.6.2	8.26825	33.7255	2.1831	5.46226	8.46202	7.36393	4.99243	5.90338	1.65885	0.790665
chr12:49348067-49348772:+	DNAJC22	ENST00000549441.6	ENST00000549441.6.1	1	5.67508	10.6249	5.33147	2.85669	5.1181	2.12411	4.40551	1.81147	0.939439
chr15:50424572-50439025:+	USP8	ENST00000396444.7	ENST00000396444.7.1	51.3648	18.2996	18.8889	16.7612	6.31791	20.6686	12.0764	16.7179	3.03301	1.53383
chr15:50424463-50424493:+	USP8	ENST00000396444.7	ENST00000396444.7.2	51.3648	103.852	84.9994	20.0131	55.5752	91.5982	19.9142	30.5504	1.46647	0.803512
chr5:136147886-136153598:+	SMAD5	ENST00000545279.5	ENST00000545279.5.1	17.1517	18.2996	10.7176	8.24263	29.1631	28.7219	11.8665	9.53355	0.13741	-0.418391
chr9:128322700-128322745:+	COQ4	ENST00000300452.7	ENST00000300452.7.1	5.46775	11.7093	8.36841	5.62856	23.1914	13.5646	10.4008	13.3936	0.262047	-0.783496
chr1:77641540-77641579:-	ZZZ3	ENST00000370798.5	ENST00000370798.5.1	21.9853	1.90338	4.69444	4.61068	23.5231	4.25229	4.98547	6.91009	0.205593	-0.419322
chr10:50460756-50460792:-	SGMS1	ENST00000361781.6	ENST00000361781.6.1	21.9853	38.4006	16.3999	33.0529	18.3254	5.33904	11.6108	7.65954	2.44663	1.81965
chr6:63572553-63572688:+	PTP4A1	ENST00000370651.5	ENST00000370651.5.2	6.86735	25.7137	25.5	25.373	6.22807	9.81558	5.67656	5.53012	1.44329	1.67837
chr10:28532786-28532897:+	WAC	ENST00000375664.8	ENST00000375664.8.2	97.5325	99.1766	31.8636	36.1896	59.3317	61.4574	21.9052	29.525	0.165797	0.569961
chr3:10248423-10248819:+	TATDN2	ENST00000287652.8	ENST00000287652.8.1	3.68065	5.94275	3.66304	7.98065	10.1185	9.07721	7.08151	5.81097	0.386964	-0.459432
chr3:10249041-10249366:+	TATDN2	ENST00000287652.8	ENST00000287652.8.2	34.5765	5.94275	6.73999	2.72778	6.39588	5.42538	3.4096	3.44398	1.83548	1.21261
chr9:115118001-115118229:-	TNC	ENST00000350763.8	ENST00000350763.8.1	28.4578	36.6836	70.3859	40.6345	70.1617	55.982	55.1451	45.3988	0.321015	-0.307434
chr19:43935004-43935106:-	ZNF45	ENST00000269973.9	ENST00000269973.9.1	6.24973	4.11148	5.025	6.79328	5.12394	5.01502	5.59945	5.73144	0.174533	0.0434214
chr19:43924248-43924408:-	ZNF45	ENST00000269973.9	ENST00000269973.9.2	84.9413	61.776	20.7931	30.4832	49.5112	23.3852	23.9883	24.6259	0.664496	0.691963
chr5:141476010-141476052:+	PCDHGC3	ENST00000617641.4	ENST00000617641.4.1	38.7736	1	8.97221	4.77393	12.6043	7.05791	7.96626	11.0296	1.14391	0.256106
chr12:48852113-48852137:-	DDX23	ENST00000308025.7	ENST00000308025.7.1	164.686	127.227	42.0453	154.334	175.121	178.765	53.7901	112.719	0.255409	-0.0728783
chr10:87863708-87863846:+	PTEN	ENST00000371953.7	ENST00000371953.7.1	9.39413	19.7003	1.78873	2.16407	1.81243	5.26297	2.01556	2.26001	1.84225	1.42913
chr17:16215472-16215526:-	NCOR1	ENST00000268712.7	ENST00000268712.7.1	131.109	117.877	75.1997	29.3256	128.647	140.602	82.433	56.8688	0.187824	-0.283917
chr21:42010291-42010345:-	ZBTB21	ENST00000310826.9	ENST00000310826.9.1	34.9185	136.577	87.333	72.3302	37.2055	38.4443	30.4135	79.3211	1.16855	1.04868
chr15:57706727-57708746:+	POLR2M	ENST00000299638.7	ENST00000299638.7.1	1	1	3.65517	1.39392	1.95106	1.09563	1.18361	0.935428	0.980091	0.585817
chrX:13689127-13703850:+	RAB9A	ENST00000464506.1	ENST00000464506.1.1	7.17615	33.1278	5.37154	7.86696	5.5095	11.2052	6.50237	6.90919	0.826516	0.637767
chr7:151082585-151083545:-	TMUB1	ENST00000297533.8	ENST00000297533.8.1	2.7871	3.47137	3.94	9.87665	6.87054	3.01017	3.70319	3.94116	0.763273	0.358634
chr16:19114390-19114510:+	ITPRIPL2	ENST00000381440.4	ENST00000381440.4.1	5.19707	1	7.36362	3.40712	5.5735	3.68205	4.75323	3.9754	0.452552	-0.147888
chr20:24992684-24992834:-	APMAP	ENST00000217456.2	ENST00000217456.2.1	10.3823	150.602	21.1403	27.1604	109.152	238.477	34.4812	28.5551	0.30676	-0.804091
chr2:202377209-202377284:+	BMPR2	ENST00000374580.8	ENST00000374580.8.1	38.7736	71.1261	28.3636	29.5321	50.6665	32.7025	20.8167	35.7292	0.565304	0.358766
chr5:141970807-141970828:+	RNF14	ENST00000394520.6	ENST00000394520.6.1	5.8455	38.4006	23.8666	26.5298	27.4578	33.5603	15.92	31.4023	0.472029	-0.11204
chr12:12343381-12350113:-	MANSC1	ENST00000535902.5	ENST00000535902.5.1	21.9853	24.3754	11.1818	8.46207	15.9	21.8274	26.7024	20.9729	0.429758	-0.268081
chr6:106293079-106316208:-	ATG5	ENST00000636437.1	ENST00000636437.1.1	1.61762	1.23731	2.90909	2.10166	1.5524	1.27746	1.7251	1.66276	0.27958	0.310594
chr1:154220521-154220560:-	C1orf43	ENST00000350592.7	ENST00000350592.7.1	17.9593	5.96861	6.25	4.9392	10.1759	21.8661	10.6351	11.0145	0.585974	-0.379911
chr11:73876792-73876840:-	CHCHD8	ENST00000355693.4	ENST00000355693.4.1	59.7589	29.0505	73.6245	41.3835	33.9562	18.725	29.129	46.7866	0.58609	0.749181
chrX:154092264-154097665:-	MECP2	ENST00000303391.10	ENST00000303391.10.1	59.7589	5.11895	6.2807	4.92429	4.38636	3.96078	5.87788	6.47407	5.45199	2.06569
chr3:196503293-196503395:-	RNF168	ENST00000318037.3	ENST00000318037.3.2	7.46067	5.94275	11.1379	20.4955	9.55955	5.15718	10.2479	10.8107	0.40987	0.297326
chr14:49852736-49852997:-	NEMF	ENST00000298310.9	ENST00000298310.9.1	9.04196	20.771	43.6363	15.3482	36.1893	23.7974	20.77	19.2405	0.676711	0.00766485
chr12:69739456-69739555:+	RAB3IP	ENST00000550536.5	ENST00000550536.5.1	26.1824	47.7508	14.9999	27.8551	37.3834	46.9855	25.0388	42.0391	0.160992	-0.425496
chr8:123256014-123256089:-	ZHX1	ENST00000395571.7	ENST00000395571.7.1	26.1824	38.4006	10.5454	11.7788	18.1191	19.8025	19.1268	18.1393	0.574198	0.196888
chr18:51046933-51047023:+	SMAD4	ENST00000398417.6	ENST00000398417.6.1	40.5716	262.804	38.24	41.1013	43.2464	22.03	22.2801	37.0203	4.63122	1.97215
chr6:125781179-125781245:+	NCOA7	ENST00000368357.7	ENST00000368357.7.1	59.7589	85.1514	24.9302	10.0337	54.7089	68.2623	13.0363	15.0303	0.447554	0.298555
chr3:40525110-40525785:+	ZNF621	ENST00000339296.9	ENST00000339296.9.1	0.382385	1.90338	2.68	2.85704	1.77604	3.0193	1.56912	1.59101	0.681222	0.120821
chr19:52025741-52025813:-	ZNF614	ENST00000356322.10	ENST00000356322.10.1	2.61517	1.82379	2.75	1.32771	3.53616	1.61948	1.47909	2.2841	0.49344	0.106428
chr11:57673055-57673163:+	ZDHHC5	ENST00000287169.7	ENST00000287169.7.1	13.1138	9.23791	16.2069	35.8134	10.2251	24.1416	12.0986	9.42749	1.26932	0.766288
chr11:57667926-57668016:+	ZDHHC5	ENST00000287169.7	ENST00000287169.7.2	7.25485	52.4258	31.3332	66.8383	23.1914	18.725	14.1517	12.6873	1.76984	1.40529
chr11:57672203-57672269:+	ZDHHC5	ENST00000287169.7	ENST00000287169.7.3	68.1531	9.23791	31.3332	35.8134	23.1914	11.1918	17.0441	21.6853	0.753207	0.858778
chr6:132814551-132814759:+	RPS12	ENST00000230050.3	ENST00000230050.3.1	2.28241	2.72616	2.09854	2.11781	1.83066	4.32906	3.85539	4.41685	0.305876	-0.463798
chr2:161179642-161179744:+	TANK	ENST00000259075.6	ENST00000259075.6.1	51.3648	57.1009	6.03508	6.24341	4.04813	4.73522	4.5736	4.2422	5.49378	2.78338
chr5:77087114-77087249:-	ZBED3	ENST00000255198.2	ENST00000255198.2.2	1.44678	5.67508	4.30555	3.2364	4.46509	0.551266	0.956113	1	3.62564	2.19836
chr3:184315496-184315800:+	EIF4G1	ENST00000346169.6	ENST00000346169.6.1	32.5601	38.9822	25.4825	23.6313	37.7846	47.3507	26.226	29.9364	0.0685487	-0.215066
chr12:88142403-88142460:+	TMTC3	ENST00000266712.10	ENST00000266712.10.1	12.3062	113.202	21.6316	43.8467	59.9658	192.492	32.0411	22.681	0.64966	-0.233777
chr13:26221270-26221330:-	RNF6	ENST00000381588.8	ENST00000381588.8.1	84.9413	9.23791	15.1944	12.182	20.9723	20.0582	18.1682	15.7993	1.4622	0.613082
chr17:21284844-21284889:+	MAP2K3	ENST00000342679.8	ENST00000342679.8.1	11.4986	57.1009	13.3103	9.12434	7.98873	10.1626	7.90505	6.64455	1.78774	1.33844
chr19:45901688-45901811:-	MYPOP	ENST00000322217.5	ENST00000322217.5.1	1	10.3502	8.87494	2.16407	3.59882	2.22101	1.8991	3.94113	2.12876	1.34487
chr17:82023611-82023770:+	LRRC45	ENST00000306688.7	ENST00000306688.7.1	10.691	15.8282	4.80701	7.01034	6.03707	4.75487	4.16724	3.59356	0.794804	1.03634
chr3:66221015-66221072:+	SLC25A26	ENST00000354883.10	ENST00000354883.10.1	9.39413	15.0252	4.3793	7.03432	3.71614	5.03861	5.78058	6.23555	0.929456	0.886674
chr2:27370638-27370668:+	SNX17	ENST00000233575.6	ENST00000233575.6.1	84.9413	117.877	61.6664	20.0131	177.72	100.716	38.1642	41.7129	0.483487	-0.0954408
chr12:753222-753300:+	WNK1	ENST00000535572.5	ENST00000535572.5.1	143.7	113.202	76.5997	53.6259	125.589	74.1173	102.303	123.62	0.411481	-0.0536083
chr12:753275-753431:+	WNK1	ENST00000535572.5	ENST00000535572.5.2	143.7	113.202	52.2271	40.7175	55.3724	74.1173	70.297	75.6437	0.807662	0.433954
chr1:45660611-45660635:-	GPBP1L1	ENST00000290795.7	ENST00000290795.7.1	26.1824	24.3754	3.70175	4.93256	8.29147	5.02035	8.12737	5.05163	1.761	1.23955
chr10:21497042-21497138:-	CASC10	ENST00000377113.5	ENST00000377113.5.1	13.5912	1	2.86666	1.48142	1	2.3727	1.12844	0.912741	5.27716	2.18397
chr16:50749576-50749672:+	CYLD	ENST00000427738.7	ENST00000427738.7.1	30.3795	43.0757	24.7999	5.04692	16.851	12.6153	10.14	23.1037	1.16286	0.978483
chr6:109094387-109094471:-	SESN1	ENST00000436639.6	ENST00000436639.6.1	55.5619	52.4258	49.1247	12.4128	106.685	68.5626	21.294	40.9259	0.786744	-0.0381121
chr15:89333820-89333892:-	POLG	ENST00000268124.9	ENST00000268124.9.1	135.306	12.5331	19.6666	34.2874	39.6765	44.9564	25.4042	21.5932	1.19104	0.597186
chr12:68746253-68746652:+	SLC35E3	ENST00000398004.3	ENST00000398004.3.1	2.61517	2.18655	2.61538	5.33282	2.52407	3.07026	2.63276	3.31735	0.325125	0.120755
chr14:55027412-55043015:+	SOCS4	ENST00000395472.2	ENST00000395472.2.1	4.23033	9.23791	6.87999	10.3125	5.06215	7.30282	5.63583	4.03357	0.649497	0.555349
chr16:31073942-31074008:-	ZNF668	ENST00000300849.4	ENST00000300849.4.1	26.1824	33.7255	26.3748	16.7821	19.1917	13.3543	10.6123	10.3405	0.514284	0.999632
chr19:10500010-10503551:-	KEAP1	ENST00000171111.9	ENST00000171111.9.1	47.1677	6.91182	7.50877	5.53746	9.77425	9.51106	6.86137	7.8286	1.73153	0.878552
chr6:82247567-82247627:-	IBTK	ENST00000306270.11	ENST00000306270.11.1	4.77513	13.1957	16.5965	15.5366	11.8866	22.3722	22.5624	42.016	0.148184	-0.931736
chr17:63826928-63827159:-	FTSJ3	ENST00000427159.6	ENST00000427159.6.1	311.583	54.5464	124.454	317.197	205.44	99.9302	108.434	70.9031	1.51399	0.941842
chr1:169368247-169368280:+	BLZF1	ENST00000329281.6	ENST00000329281.6.1	51.3648	71.1261	20.7931	16.5209	35.3488	60.7125	24.5795	36.1641	0.371535	-0.0264284
chr2:152175695-152175872:-	STAM2	ENST00000263904.4	ENST00000263904.4.1	26.1824	66.4511	19.6666	21.4239	58.174	46.5844	19.4215	40.6851	0.394729	-0.227804
chrX:68829156-68829222:+	EFNB1	ENST00000204961.4	ENST00000204961.4.1	68.1531	43.0757	14.2758	7.98694	60.8783	16.257	17.2063	11.0719	0.775661	0.411489
chr10:33334597-33334663:-	NRP1	ENST00000265371.8	ENST00000265371.8.1	11.2758	145.927	41.409	32.2358	39.802	38.7498	26.3626	33.0168	1.30431	0.721652
chr3:100400935-100401118:-	TOMM70	ENST00000284320.5	ENST00000284320.5.1	16.1316	40.542	9.91257	18.6187	45.5314	16.0656	9.31667	12.873	0.784164	0.429783
chr19:37324921-37357996:+	HKR1	ENST00000591471.5	ENST00000591471.5.1	1.12317	2.38621	1.80186	1.854	1.98909	2.92023	1.3713	1.79702	0.275673	-0.101797
chr1:68497006-68497027:-	DEPDC1	ENST00000370966.9	ENST00000370966.9.1	1.6412	2.24459	2.39007	2.83689	3.72894	10.6011	3.07168	4.97973	0.205474	-1.00026
chr1:113073279-113073339:+	LRIG2	ENST00000361127.5	ENST00000361127.5.1	42.9707	103.852	59.6246	36.7418	19.1027	44.9264	12.1746	22.9725	1.26268	1.46701
chr6:43171590-43171626:+	SRF	ENST00000265354.5	ENST00000265354.5.1	26.1824	52.4258	6.37209	3.59979	35.6509	29.1404	9.48497	8.94535	0.532777	-0.148913
chr5:74763680-74766944:-	GFM2	ENST00000296805.7	ENST00000296805.7.1	101.73	13.6474	36.4827	26.8354	23.0981	22.5905	24.648	16.5328	1.42636	1.02
chr17:19977722-19977800:-	AKAP10	ENST00000225737.10	ENST00000225737.10.1	12.3062	131.902	20.7272	23.5087	14.9489	39.6653	32.3444	25.1283	1.09863	0.517267
chr5:173328563-173328977:-	STC2	ENST00000265087.8	ENST00000265087.8.2	63.9915	173.978	39.8407	44.4558	79.8308	35.3175	67.9355	103.954	1.8757	0.753133
chr5:173329206-173329407:-	STC2	ENST00000265087.8	ENST00000265087.8.3	24.4694	16.8092	39.8407	33.9483	79.8308	35.3175	19.6766	32.0268	0.671734	-0.0486995
chr19:40751110-40751140:+	SNRPA	ENST00000243563.7	ENST00000243563.7.1	269.612	47.1323	119.045	120.518	117.043	66.9639	82.3125	63.6774	0.592999	0.665907
chr3:44959432-44976117:-	ZDHHC3	ENST00000296127.7	ENST00000296127.7.1	5.19707	1.82379	4.81817	1.77604	1.65542	3.11484	2.18073	3.20965	1.10272	0.697708
chr16:67571148-67571187:+	CTCF	ENST00000264010.9	ENST00000264010.9.1	20.382	16.3575	22.6562	29.6539	28.9375	31.9777	22.5309	44.8914	0.179432	-0.472924
chr18:9708368-9775333:+	RAB31	ENST00000578921.5	ENST00000578921.5.1	1.47189	1	1.9899	2.06958	1.52702	2.11852	2.02217	1.97585	0.230026	-0.206143
chr12:64409961-64410027:+	XPOT	ENST00000332707.9	ENST00000332707.9.1	7.25485	8.41412	9.47368	6.47348	12.6013	8.86707	11.1132	12.2239	0.178081	-0.460623
chr9:34336279-34338812:+	NUDT2	ENST00000379158.6	ENST00000379158.6.1	0.618194	2.80677	1.38043	3.33005	3.09662	5.03153	2.55557	2.49354	0.416226	-0.603235
chr14:50668006-50668138:-	SAV1	ENST00000324679.4	ENST00000324679.4.2	1	2.64758	9.86663	4.4922	6.07233	7.05791	3.65925	5.89562	1.00281	-0.000681388
chr1:226871352-226871379:+	PSEN2	ENST00000366783.7	ENST00000366783.7.1	72.3501	43.0757	33.3748	20.4955	33.9562	18.9081	25.3711	25.1482	0.598722	0.709135
chr4:15686305-15686362:+	FAM200B	ENST00000422728.2	ENST00000422728.2.1	1	5.67508	2.90909	1.63405	3.59882	4.25603	2.41287	2.26848	0.418217	-0.177365
chr3:9649540-9649564:+	MTMR14	ENST00000353332.9	ENST00000353332.9.1	8.26825	19.7003	4.0625	5.61258	6.76378	20.0918	8.98077	9.77568	0.309309	-0.308717
chr10:15860286-15860352:-	FAM188A	ENST00000277632.7	ENST00000277632.7.1	13.9213	75.8012	18.3055	16.7946	12.6406	51.7899	10.2772	12.5692	0.245427	0.506474
chr12:132822200-132822248:-	GOLGA3	ENST00000456883.6	ENST00000456883.6.1	126.912	141.252	123.499	74.8044	44.1148	98.4617	65.9874	59.0574	0.625932	0.897172
chr19:6361456-6361534:+	CLPP	ENST00000245816.9	ENST00000245816.9.1	72.3501	80.4763	53.7331	17.7361	24.4821	31.0532	30.3786	39.7185	0.963706	0.956448
chr19:48645935-48646025:-	CA11	ENST00000084798.8	ENST00000084798.8.1	2.34033	1.90338	1.41176	3.85321	3.32812	2.53719	2.68676	5.25357	0.0897105	-0.56049
chr1:111137545-111137566:-	DRAM2	ENST00000286692.8	ENST00000286692.8.1	21.9853	33.7255	27.2498	24.3899	38.2497	62.7715	23.1897	18.5821	0.347565	-0.152125
chr19:36235728-36235818:+	ZNF146	ENST00000443387.2	ENST00000443387.2.3	13.5097	18.2996	31.1	30.4322	23.3639	18.2134	13.943	19.0923	0.622423	0.434943
chr8:17245235-17246782:-	CNOT7	ENST00000361272.8	ENST00000361272.8.1	17.7883	29.0505	22.8748	8.42686	7.34041	8.62848	5.64254	7.50074	1.09919	1.45518
chr14:23299591-23307260:+	BCL2L2	ENST00000553824.5	ENST00000553824.5.1	1	1	0.385966	0.301124	0.440901	0.172282	0.38152	0.417857	2.02145	1.29349
chr9:34126411-34126504:-	DCAF12	ENST00000361264.8	ENST00000361264.8.1	110.124	18.2996	21.0232	10.2971	9.78579	12.0931	8.36184	9.86276	4.17478	2.029
chr7:43650550-43729464:-	COA1	ENST00000310564.10	ENST00000310564.10.1	55.5619	6.76654	5.57692	5.48256	2.44441	3.00466	3.82237	5.57292	9.176	2.77742
chr19:11356879-11356963:+	PLPPR2	ENST00000251473.9	ENST00000251473.9.1	5.19707	5.67508	2.39999	4.46518	10.529	3.84902	2.76846	4.47978	0.350771	-0.0620306
chr2:61145127-61162862:+	C2orf74	ENST00000426997.5	ENST00000426997.5.1	1	1.82379	2.5909	1.27955	1.19401	1.3665	1.67634	1.32102	0.282516	0.22846
chr17:40122308-40122479:+	MSL1	ENST00000398532.8	ENST00000398532.8.1	34.5765	47.7508	10.5278	54.7102	17.1276	50.4172	7.92021	23.1037	0.558457	0.736199
chr1:161045937-161045964:-	USF1	ENST00000368021.7	ENST00000368021.7.1	55.5619	52.4258	47.3747	49.5125	53.8426	40.122	20.4531	55.0445	0.555359	0.473618
chr16:57735794-57736988:+	KATNB1	ENST00000379661.7	ENST00000379661.7.1	80.7443	52.4258	14.6111	65.972	11.5465	19.5133	25.4042	24.2311	2.33238	1.69793
chr6:37697463-37697913:-	MDGA1	ENST00000434837.7	ENST00000434837.7.1	5.03792	1.31115	3.86363	3.53619	10.1936	4.40716	4.48191	3.63458	0.272759	-0.606744
chr19:1021083-1021110:-	TMEM259	ENST00000356663.7	ENST00000356663.7.1	156.291	12.2923	22.5833	104.955	46.3339	102.58	29.3071	41.5915	1.30751	0.762783
chr7:151080762-151080789:-	FASTK	ENST00000482571.2	ENST00000482571.2.1	47.1677	29.0505	9.27271	6.07237	22.8161	20.2178	20.7043	7.31495	0.614563	0.257665
chr22:19432177-19432288:+	MRPL40	ENST00000333130.3	ENST00000333130.3.1	122.715	122.552	42.9998	102.356	160.394	100.716	104.816	127.874	0.285853	-0.325278
chr12:109093363-109093411:-	ALKBH2	ENST00000343075.7	ENST00000343075.7.1	38.7736	19.7003	31.6248	23.5236	27.8544	24.3359	11.2392	16.3174	0.735818	0.690853
chr5:52788060-52788153:+	ITGA1	ENST00000282588.6	ENST00000282588.6.1	89.1384	13.1957	11.64	13.1408	45.5606	83.6217	38.1616	23.0704	0.713586	-0.420387
chr9:134026524-134026620:+	RP11-374P20.5	ENST00000603928.2	ENST00000603928.2.2	1.80758	1	2.74999	1.92836	2.73254	0.551266	1.69138	1.1182	0.463777	0.542484
chr19:36689412-36689439:+	ZNF567	ENST00000536254.6	ENST00000536254.6.1	13.1138	13.3569	46.7332	31.1172	66.8367	33.1533	22.0742	51.8654	0.75724	-0.270494
chr11:65613870-65613930:-	MAP3K11	ENST00000309100.7	ENST00000309100.7.1	21.9853	24.3754	17.6249	3.21916	11.3953	14.727	8.92488	7.9505	0.638898	0.576327
chr8:42049150-42049237:-	KAT6A	ENST00000406337.5	ENST00000406337.5.1	21.1896	27.3613	53.4999	29.5196	122.278	56.3525	42.5589	45.0892	0.39454	-0.637895
chr8:42049007-42049085:-	KAT6A	ENST00000406337.5	ENST00000406337.5.2	11.7226	155.278	27.3721	36.6254	65.52	31.0652	29.5114	69.863	1.94713	0.728815
chr11:128694217-128758133:+	FLI1	ENST00000527786.6	ENST00000527786.6.1	26.1824	38.4006	14.5333	20.0585	13.9968	16.0997	6.39461	9.24514	0.191322	1.12071
chr21:29024631-29027897:+	USP16	ENST00000399976.6	ENST00000399976.6.1	25.2275	5.41129	11.2212	8.92802	12.1071	11.8161	7.77799	9.05336	0.597683	0.313391
chr12:123972553-123972616:-	CCDC92	ENST00000238156.7	ENST00000238156.7.1	1	1	1	1	1	1.81401	0.486227	1	0.553508	0.204115
chr11:208065-208119:+	RIC8A	ENST00000526104.5	ENST00000526104.5.2	80.7443	85.1514	49.5331	52.988	67.703	62.7715	48.2255	54.869	0.152225	0.183323
chr14:104795514-104795553:-	AKT1	ENST00000349310.7	ENST00000349310.7.1	76.5472	4.29516	38.6247	29.5877	29.8489	44.5494	29.4428	63.7147	0.948747	0.14963
chr12:133080976-133081272:+	ZNF140	ENST00000355557.6	ENST00000355557.6.1	9.07584	33.7255	24.7999	15.4427	10.2834	28.454	9.73413	8.29378	0.642655	0.695442
chr1:161176439-161176505:-	B4GALT3	ENST00000367998.5	ENST00000367998.5.1	2.7871	2.80677	2.81176	1.37142	4.18847	2.18209	2.17366	3.05408	0.374253	-0.114699
chr9:130714089-130714203:+	ABL1	ENST00000372348.6	ENST00000372348.6.1	72.3501	57.1009	66.6245	67.7046	80.697	53.5034	28.0808	80.8186	0.628677	0.37132
chr3:168095442-168095559:-	GOLIM4	ENST00000470487.5	ENST00000470487.5.1	10.3823	23.1329	20.2051	15.2712	31.8476	46.6805	25.1057	32.2924	0.174264	-0.930116
[truncated: 236 more rows]
